# Supplementary material for: Herbal plants coordinate COVID-19 in multiple dimensions - An insight analysis for clinically applied remedies
Source: PubMed Central journal article supplement (PMC7646114; doi:10.7150/ijms.50260), 2020-10-22
Supplement: ijmsv17p3125s1.pdf [file ijmsv17p3125s1.pdf]

**Table S1. The regional distribution of TCM coverage and curative rate nationwide.**

| NO. | Regions       | TCM Coverage (%) | Cut-off Date | Source                                                                                                                         | Cumulative Cured Cases | Cumulative Confirmed Cases (Import Abroad Excluded) | Curative Rate (Cured Patients / Confirmed Cases) (%) |
|-----|---------------|------------------|--------------|--------------------------------------------------------------------------------------------------------------------------------|------------------------|-----------------------------------------------------|------------------------------------------------------|
| 1   | Beijing       | 87.00            | 2020.2.25    | Beijing municipal Health Commission<br>( <a href="http://wjw.beijing.gov.cn/">http://wjw.beijing.gov.cn/</a> )                 | 334                    | 415 (20)                                            | 80.48                                                |
| 2   | Shanxi 1 (山西) | 98.40            | 2020.3.10    | National Administration of Traditional Chinese Medicine<br>( <a href="http://www.satcm.gov.cn/">http://www.satcm.gov.cn/</a> ) | 132                    | 133                                                 | 99.25                                                |
| 3   | Zhejiang      | 97.76            | 2020.3.2     | Zhejiang Administration of Traditional Chinese Medicine<br>( <a href="http://www.zjtcn.gov.cn/">http://www.zjtcn.gov.cn/</a> ) | 1,209                  | 1,215                                               | 99.51                                                |
| 4   | Shandong      | > 98.00          | 2020.3.5     | National Administration of Traditional Chinese Medicine<br>( <a href="http://www.satcm.gov.cn/">http://www.satcm.gov.cn/</a> ) | 734                    | 760                                                 | 96.58                                                |
| 5   | Tianjin       | 99.00            | 2020.3.4     | National Administration of Traditional Chinese Medicine<br>( <a href="http://www.satcm.gov.cn/">http://www.satcm.gov.cn/</a> ) | 132                    | 136                                                 | 97.06                                                |
| 6   | Henan         | 98.74            | 2020.2.27    | National Administration of Traditional Chinese Medicine<br>( <a href="http://www.satcm.gov.cn/">http://www.satcm.gov.cn/</a> ) | 1,249                  | 1,273                                               | 98.11                                                |
| 7   | Hubei         | > 90.00          | 2020.3.6     | National Administration of Traditional Chinese Medicine<br>( <a href="http://www.satcm.gov.cn/">http://www.satcm.gov.cn/</a> ) | 50,316                 | 67,781                                              | 74.23                                                |

|    |               |        |           |                                                                                                                                                                                                                            |       |         |       |
|----|---------------|--------|-----------|----------------------------------------------------------------------------------------------------------------------------------------------------------------------------------------------------------------------------|-------|---------|-------|
| 8  | Sichuan       | 93.20  | 2020.2.26 | Sichuan administration of traditional Chinese medicine<br>( <a href="http://sctcm.sc.gov.cn/">http://sctcm.sc.gov.cn/</a> )                                                                                                | 496   | 539     | 92.02 |
| 9  | Yunnan        | 100.00 | 2020.2.25 | Yunnan administration of traditional Chinese medicine<br>( <a href="http://ynewsjkw.yn.gov.cn/">ynewsjkw.yn.gov.cn</a> )                                                                                                   | 170   | 174     | 97.70 |
| 10 | Shanxi 2 (陕西) | 93.50  | 2020.3.4  | Shanxi administration of traditional Chinese medicine<br>( <a href="http://atcm.shaanxi.gov.cn/">http://atcm.shaanxi.gov.cn/</a> )                                                                                         | 232   | 245     | 94.69 |
| 11 | Hunan         | 100.00 | 2020.3.4  | Hu'nan provincial health commission<br>( <a href="http://wjw.hunan.gov.cn/">http://wjw.hunan.gov.cn/</a> )                                                                                                                 | 999   | 1,018   | 98.13 |
| 12 | Gansu         | 97.80  | 2020.3.4  | Health Commission of Gansu municipal<br>( <a href="http://wsjk.gansu.gov.cn/">http://wsjk.gansu.gov.cn/</a> )                                                                                                              | 88    | 91 (36) | 96.70 |
| 13 | Hainan        | 93.00  | 2020.2.27 | National Administration of Traditional Chinese Medicine<br>( <a href="http://www.satcm.gov.cn/">http://www.satcm.gov.cn/</a> )                                                                                             | 160   | 168     | 95.24 |
| 14 | Guangdong     | 93.54  | 2020.2.23 | National Administration of Traditional Chinese Medicine<br>( <a href="http://www.satcm.gov.cn/">http://www.satcm.gov.cn/</a> )                                                                                             | 1,289 | 1,356   | 95.06 |
| 15 | Jiangxi       | 95.00  | 2020.2.16 | COVID 19 epidemic prevention and control work press<br>conference of Jiangxi province<br>( <a href="https://www.chinanews.com/sh/2020/02-16/9093640.shtml">https://www.chinanews.com/sh/2020/02-16/9093640.shtml</a><br>1) | 934   | 935     | 99.89 |

|    |              |            |            |                                                                                                                                                                                                                         |     |     |        |
|----|--------------|------------|------------|-------------------------------------------------------------------------------------------------------------------------------------------------------------------------------------------------------------------------|-----|-----|--------|
| 16 | Guizhou      | 94.52      | 2020.2.25  | Guizhou Administration of Traditional Chinese Medicine<br>( <a href="http://atcm.guizhou.gov.cn/">http://atcm.guizhou.gov.cn/</a> )                                                                                     | 137 | 146 | 93.84  |
| 17 | Heilongjiang | 95.26      | 2020.2.18  | Heilongjiang Administration of Traditional Chinese<br>Medicine<br>( <a href="http://news.cnr.cn/native/city/20200220/t20200220_524983029.shtml">http://news.cnr.cn/native/city/20200220/t20200220_524983029.shtml</a> ) | 440 | 482 | 91.29  |
| 18 | Jilin        | 100.00     | 2020.2.27  | National Administration of Traditional Chinese Medicine<br>( <a href="http://www.satcm.gov.cn/">http://www.satcm.gov.cn/</a> )                                                                                          | 91  | 93  | 97.85  |
| 19 | Liaoning     | > 90.00    | 2020.3.4   | National Administration of Traditional Chinese Medicine<br>( <a href="http://www.satcm.gov.cn/">http://www.satcm.gov.cn/</a> )                                                                                          | 111 | 125 | 88.80  |
| 20 | Anhui        | 98.50      | 2020.2.20  | National Administration of Traditional Chinese Medicine<br>( <a href="http://www.satcm.gov.cn/">http://www.satcm.gov.cn/</a> )                                                                                          | 984 | 990 | 99.39  |
| 21 | Qinghai      | unreported | unreported | unreported                                                                                                                                                                                                              | 18  | 18  | 100.00 |
| 22 | Jiangsu      | 96.35      | 2020.3.11  | Jiangsu Provincial Party Committee<br>( <a href="http://www.jszsb.gov.cn/zyxw/info_110.aspx?itemid=29064">http://www.jszsb.gov.cn/zyxw/info_110.aspx?itemid=29064</a> )                                                 | 629 | 631 | 99.68  |
| 23 | Shanghai     | 95.00      | 2020.3.7   | National Administration of Traditional Chinese Medicine<br>( <a href="http://www.satcm.gov.cn/">http://www.satcm.gov.cn/</a> )                                                                                          | 321 | 344 | 93.31  |
| 24 | Chongqing    | 92.36      | 2020.3.4   | National Administration of Traditional Chinese Medicine<br>( <a href="http://www.satcm.gov.cn/">http://www.satcm.gov.cn/</a> )                                                                                          | 554 | 576 | 96.18  |

|    |                                  |        |           |                                                                                                                                                          |     |     |        |
|----|----------------------------------|--------|-----------|----------------------------------------------------------------------------------------------------------------------------------------------------------|-----|-----|--------|
| 25 | Guangxi                          | 97.60  | 2020.3.4  | Guangxi zhuang autonomous region administration of traditional Chinese medicine<br>( <a href="http://wsjkw.gxzf.gov.cn/">http://wsjkw.gxzf.gov.cn/</a> ) | 241 | 252 | 95.63  |
| 26 | Neimenggu                        | 98.70  | 2020.3.12 | Health commission of Inner Mongolia autonomous region<br>( <a href="http://wjw.nmg.gov.cn/">http://wjw.nmg.gov.cn/</a> )                                 | 71  | 75  | 94.67  |
| 27 | Suzhou, Jiangsu                  | 100.00 | 2020.3.12 | China News<br>( <a href="http://www.js.chinanews.com/news/2020/0311/194630.html">http://www.js.chinanews.com/news/2020/0311/194630.html</a> )            | 87  | 87  | 100.00 |
| 28 | Fujian                           | 99.00  | 2020.3.6  | Health commission of Fujian province<br>( <a href="http://wjw.fujian.gov.cn/">http://wjw.fujian.gov.cn/</a> )                                            | 295 | 296 | 99.66  |
| 29 | Hebei                            | 97.00  | 2020.2.29 | National Administration of Traditional Chinese Medicine<br>( <a href="http://www.satcm.gov.cn/">http://www.satcm.gov.cn/</a> )                           | 310 | 318 | 97.48  |
| 30 | Ningxia                          | 98.60  | 2020.2.27 | National Administration of Traditional Chinese Medicine<br>( <a href="http://www.satcm.gov.cn/">http://www.satcm.gov.cn/</a> )                           | 72  | 75  | 96.00  |
| 31 | Shenzhen                         | 95.70  | 2020.3.7  | National Administration of Traditional Chinese Medicine<br>( <a href="http://www.satcm.gov.cn/">http://www.satcm.gov.cn/</a> )                           | 392 | 420 | 93.33  |
| 32 | 49 designated hospitals in Wuhan | 94.74  | 2020.2.28 | Health Commission of Hubei province<br>( <a href="http://wjw.hubei.gov.cn/">http://wjw.hubei.gov.cn/</a> )                                               |     |     |        |
| 33 | 43 designated hospitals in Hubei | 97.71  | 2020.2.28 | Health Commission of Hubei province<br>( <a href="http://wjw.hubei.gov.cn/">http://wjw.hubei.gov.cn/</a> )                                               |     |     |        |

We developed COVID-19 epidemiology based on the openly published data from National Administration of Traditional Chinese Medicine largely, and the according websites were attached here. The regions nationwide, including provinces and the main hospitals. Provinces were noted by Chinese Pinyin by convention, and the two with same Pin Yin were differed by attaching numbers and Chinese characters. This included Shanxi 1 (山西) and Shanxi 2 (陕西). The confirmed and cured cases were recorded up to March 15, 2020. And curative rate was calculated out by them. In addition, confirmed cases imported abroad newly were excluded, including Beijing and Gansu, as shown in the brackets of "Cumulative confirmed cases (import abroad excluded)", e.g., Beijing: 415 (20), etc.

**Table S2. The regional epidemiology nationwide in China.**

| NO. | Areas            | Cumulative Confirmed Cases | Cumulative Cured Cases | Cure Rate(%) | Cumulative Death Toll | Fatal Rate(%) |
|-----|------------------|----------------------------|------------------------|--------------|-----------------------|---------------|
| 1   | Nationwide       | 81753                      | 73301                  | 89.66154147  | 3283                  | 4.015754774   |
| 2   | Hubei region     | 67801                      | 60323                  | 88.97066415  | 3160                  | 4.66069822    |
| 3   | Non-hubei region | 13952                      | 12978                  | 93.01892202  | 123                   | 0.881594037   |
| 4   | Hubei            | 67801                      | 60323                  | 88.97066415  | 3160                  | 4.66069822    |
| 5   | Guangdong        | 1428                       | 1333                   | 93.34733894  | 8                     | 0.56022409    |
| 6   | Henan            | 1274                       | 1250                   | 98.11616954  | 22                    | 1.726844584   |

|    |              |      |      |             |    |             |
|----|--------------|------|------|-------------|----|-------------|
| 7  | Zhejiang     | 1240 | 1221 | 98.46774194 | 1  | 0.080645161 |
| 8  | Hunan        | 1018 | 1014 | 99.60707269 | 4  | 0.392927308 |
| 9  | Anhui        | 990  | 984  | 99.39393939 | 6  | 0.606060606 |
| 10 | Jiangxi      | 936  | 934  | 99.78632479 | 1  | 0.106837607 |
| 11 | Shandong     | 768  | 752  | 97.91666667 | 7  | 0.911458333 |
| 12 | Jiangshu     | 636  | 631  | 99.21383648 | 0  | 0           |
| 13 | Chongqing    | 578  | 570  | 98.61591696 | 6  | 1.038062284 |
| 14 | Beijing      | 558  | 401  | 71.86379928 | 8  | 1.433691756 |
| 15 | Sichuan      | 545  | 536  | 98.34862385 | 3  | 0.550458716 |
| 16 | Heilongjiang | 484  | 468  | 96.69421488 | 13 | 2.685950413 |
| 17 | Shanghai     | 414  | 330  | 79.71014493 | 4  | 0.966183575 |
| 18 | Hebei        | 319  | 310  | 97.17868339 | 6  | 1.880877743 |
| 19 | Fujian       | 318  | 295  | 92.7672956  | 1  | 0.314465409 |
| 20 | Guangxi      | 254  | 250  | 98.42519685 | 2  | 0.787401575 |
| 21 | Shanxi 2(陕西) | 249  | 240  | 96.38554217 | 3  | 1.204819277 |
| 22 | Yunan        | 176  | 172  | 97.72727273 | 2  | 1.136363636 |
| 23 | Hainan       | 168  | 162  | 96.42857143 | 6  | 3.571428571 |
| 24 | Guizhou      | 146  | 144  | 98.63013699 | 2  | 1.369863014 |
| 25 | Tianjing     | 142  | 133  | 93.66197183 | 3  | 2.112676056 |
| 26 | Ganshu       | 136  | 118  | 86.76470588 | 2  | 1.470588235 |
| 27 | Shanxi 1(山西) | 134  | 133  | 99.25373134 | 0  | 0           |
| 28 | Niaoling     | 127  | 124  | 97.63779528 | 2  | 1.57480315  |
| 29 | Jiling       | 93   | 92   | 98.92473118 | 1  | 1.075268817 |
| 30 | Xinjiang     | 76   | 73   | 96.05263158 | 3  | 3.947368421 |
| 31 | Neimenggu    | 75   | 74   | 98.66666667 | 0  | 0           |
| 32 | Ninxia       | 75   | 75   | 100         | 0  | 0           |

|    |          |     |     |             |   |             |
|----|----------|-----|-----|-------------|---|-------------|
| 33 | Qinghai  | 18  | 18  | 100         | 0 | 0           |
| 34 | Xizhang  | 1   | 1   | 100         | 0 | 0           |
| 35 | Hangkong | 356 | 101 | 28.37078652 | 4 | 1.123595506 |
| 36 | Taiwan   | 195 | 29  | 14.87179487 | 2 | 1.025641026 |
| 37 | Macao    | 25  | 10  | 40          | 0 | 0           |

Up to March 24, 2020, the specific accumulative confirmed number, cure rate and fatal rate among the accumulative confirmed cases NO. Areas Confirmed Cumulative Cumulative Cure Rate Cumulative Fatal Rate were collected and calculated, which were divided into Hubei and non-Hubei in general. Provinces were noted by Chinese Pin Yin by convention, except for Hongkong and Macao, and the two with same Pin Yin were differed by attaching numbers and Chinese characters. This included Shanxi 1 (山西) and Shanxi 2 (陕西).

**Table S3. The database of 185 clinically applied TCM remedies in details.**

| NO. | Formula Name                      | Composition of Herbs                            | References                                   | Unified Phases | Basic Recipes     | Herbs Number of Basic Recipes | Intersections | The Similarity (%) | Monarch Herb | Minister Herb | Correspond to Cytoscape |
|-----|-----------------------------------|-------------------------------------------------|----------------------------------------------|----------------|-------------------|-------------------------------|---------------|--------------------|--------------|---------------|-------------------------|
| 1   | Pneumonia prophylaxis I (Modified | Radix Astragali seu Hedysari (黄芪, Huang Qi)15g, | Agreement on the prevention and treatment of | Prevention     | Yupingfeng Powder | 3                             | 3             | 100.00             | 1            | 1             | Pneumonia prophylaxis I |

|   |                               |                                                                                                                                                                                                                                                                                            |                                                                          |            |                      |   |   |       |   |   |
|---|-------------------------------|--------------------------------------------------------------------------------------------------------------------------------------------------------------------------------------------------------------------------------------------------------------------------------------------|--------------------------------------------------------------------------|------------|----------------------|---|---|-------|---|---|
|   | Yupingfeng Powder)            | Rhizoma Atractylodis Macrocephalae(白术, Bai Zhu)10g, Radix Saposhnikoviae(防风, Fang Feng)10g, RhizomaCyrptomiiFortunei(贯众, Guan Zhong)6g, Flos Lonicerae(金银花, Jin Yin Hua)10g, Pericarpium Citri Reticulatae(陈皮, Chen Pi)6g, Herba Eupatorii(佩兰, Pei Lan)10g Radix Bupleuri(柴胡, Chai Hu) 6g, | COVID-19 in Hubei hospital of traditional Chinese medicine (1st edition) |            |                      |   |   |       |   |   |
| 2 | Modified Xiaochaihu Decoction | Radix Scutellariae(黄芩, Huang Qin) 6g, Rhizoma Pinelliae(半夏, Ban Xia) 6g, Radix Codonopsis(党参,                                                                                                                                                                                              | The prevention and control of COVID-19 in Shanxi province (Trial)        | Prevention | Xiaochaihu Decoction | 7 | 6 | 85.70 | 1 | 1 |



|   |                                  |                                                                                                                                                                                                                                                                                                                                                                                                                                                                              |                                                                               |            |                      |   |   |        |   |   |      |
|---|----------------------------------|------------------------------------------------------------------------------------------------------------------------------------------------------------------------------------------------------------------------------------------------------------------------------------------------------------------------------------------------------------------------------------------------------------------------------------------------------------------------------|-------------------------------------------------------------------------------|------------|----------------------|---|---|--------|---|---|------|
| 3 | Modified<br>Yupingfeng<br>Powder | Dang Shen) 6g,<br>Radix<br>Saposhnikoviae(防<br>风, Fang Feng) 6g,<br>Fructus<br>Forsythiae(连翘,<br>Lian Qiao) 6g,<br>Adenophora stricta<br>Miq.(沙参, Sha<br>Shen) 6g, Flos<br>Lonicerae(金银花,<br>Jin Yin Hua) 6g,<br>Rhizoma Zingiberis<br>Recens(生姜, Sheng<br>Jiang) 6g, Radix<br>Glycyrrhizae(甘草,<br>Gan Cao) 6g<br>Radix Astragali seu<br>Hedysari(生黄芪,<br>Sheng Huang Qi)<br>12g, Rhizoma<br>Atractylodis<br>Macrocephalae(白<br>术, Bai Zhu) 9g,<br>Radix<br>Saposhnikoviae(防 | The prevention and<br>control of<br>COVID-19 in<br>Shanxi<br>province(Trial ) | Prevention | Yupingfeng<br>Powder | 3 | 3 | 100.00 | 1 | 1 | 3SX1 |
|---|----------------------------------|------------------------------------------------------------------------------------------------------------------------------------------------------------------------------------------------------------------------------------------------------------------------------------------------------------------------------------------------------------------------------------------------------------------------------------------------------------------------------|-------------------------------------------------------------------------------|------------|----------------------|---|---|--------|---|---|------|

|   |                               |                                                                                                                                                                                                                                                                                                                                                                                                                                                                                                                    |                                                                                        |            |                   |    |   |       |   |      |      |
|---|-------------------------------|--------------------------------------------------------------------------------------------------------------------------------------------------------------------------------------------------------------------------------------------------------------------------------------------------------------------------------------------------------------------------------------------------------------------------------------------------------------------------------------------------------------------|----------------------------------------------------------------------------------------|------------|-------------------|----|---|-------|---|------|------|
| 4 | Modified<br>Yinqiao<br>Powder | <p>风, Fang Feng) 9g,<br/>Herba<br/>Agastaches(藿香,<br/>Huo Xiang) 6g,<br/>Radix Glehniae(北<br/>沙参, Bei Sha<br/>Shen)12g, Flos<br/>Lonicerae(金银花,<br/>Jin Yin Hua) 9g,<br/>Bulbus Lili(百合,<br/>Bai He) 12g,<br/>RhizomaCyrtomiiF<br/>ortunei(贯众, Guan<br/>Zhong) 6g, Fructus<br/>Forsythiae(连翘,<br/>Lian Qiao) 9g<br/>Flos Lonicerae(金<br/>银花, Jin Yin Hua),<br/>Fructus<br/>Forsythiae(连翘,<br/>Lian Qiao), Herba<br/>Schizonepetae(荆<br/>芥, Jing Jie), Herba<br/>Menthae<br/>Heplocalycis(薄荷,<br/>Bo He), Radix</p> | The prevention and<br>control of<br>COVID-19 in<br>Hunan province<br>(Trial version 3) | Prevention | Yinqiao<br>Powder | 10 | 6 | 60.00 | 1 | 2月4日 | 4HuN |
|---|-------------------------------|--------------------------------------------------------------------------------------------------------------------------------------------------------------------------------------------------------------------------------------------------------------------------------------------------------------------------------------------------------------------------------------------------------------------------------------------------------------------------------------------------------------------|----------------------------------------------------------------------------------------|------------|-------------------|----|---|-------|---|------|------|





|   |                                                          |                                                                                                                                                                                                                                        |                                                                                                           |            |                                               |      |     |                  |                                                     |                                                          |     |
|---|----------------------------------------------------------|----------------------------------------------------------------------------------------------------------------------------------------------------------------------------------------------------------------------------------------|-----------------------------------------------------------------------------------------------------------|------------|-----------------------------------------------|------|-----|------------------|-----------------------------------------------------|----------------------------------------------------------|-----|
|   |                                                          | Zingiberis<br>Recens(生姜,Sheng<br>Jiang)用 5~10 片)<br>Flos Lonicerae(金<br>银花, Jin Yin<br>Hua)15g, Fructus<br>Forsythiae(连翘,<br>Lian Qiao)15g,<br>Radix Astragali seu<br>Hedysari(黄芪,<br>Huang Qi)15g,<br>Radix                           |                                                                                                           |            |                                               |      |     |                  |                                                     |                                                          |     |
| 7 | Yinqiao<br>Powder I(Close<br>contact with<br>historians) | Saposhnikoviae(防<br>风, Fang Feng)10g,<br>Rhizoma<br>Atractylodis<br>Macrocephalae(白<br>术, Bai Zhu)15g,<br>Fructus Arctii(牛蒡<br>子, Niu Bang<br>Zi)15g, Rhizoma<br>Phragmitis(芦根,<br>Lu Gen)30g, Radix<br>Glycyrrhizae(甘草,<br>Gan Cao)6g | <b>Recommendation<br/>plan for TCM<br/>treatment of<br/>COVID-19 in<br/>zhejiang province<br/>(Trial)</b> | Prevention | Yinqiao<br>Powder and<br>Yupingfeng<br>Powder | 10/3 | 5/3 | 50.00/100.<br>00 | Yinqiao<br>Powder: 1<br>Yupingfen<br>g Powder:<br>1 | Yinqiao<br>Powder:<br>1/4<br>Yupingfen<br>g Powder:<br>1 | 7ZJ |
| 8 |                                                          | Radix Astragali seu                                                                                                                                                                                                                    | The prevention and                                                                                        | Prevention | Yupingfeng                                    | 3    | 3   | 100.00           | 1                                                   | 1                                                        | 8GS |

|   |                                                                                                                                                                                                                                                                                                                                                                                                                                                                          |                                                            |                                            |                               |    |    |        |   |   |
|---|--------------------------------------------------------------------------------------------------------------------------------------------------------------------------------------------------------------------------------------------------------------------------------------------------------------------------------------------------------------------------------------------------------------------------------------------------------------------------|------------------------------------------------------------|--------------------------------------------|-------------------------------|----|----|--------|---|---|
|   | Hedysari(生黄芪,<br>Sheng Huang<br>Qi)15-30g,<br>Rhizoma<br>Atractylodis<br>Macrocephalae(白<br>术, Bai Zhu)15-30g,<br>Radix<br>Saposhnikoviae(防<br>风, Fang Feng)6-9g,<br>Rhizoma et Radix<br>Notopterygii(羌活,<br>Qiang Huo)3-6g,<br>Herba Eupatorii(佩<br>兰, Pei Lan)10-15g,<br>Rhizoma Zingiberis<br>Recens(生姜, Sheng<br>Jiang)3-6g<br>Radix Bupleuri(柴<br>胡, Chai Hu)18g,<br>Radix<br>Scutellariae(黄芩,<br>Huang Qin)12g,<br>Fructus Aurantii(枳<br>壳, Zhi Qiao)12g,<br>Radix | control of<br>COVID-19 in<br>Gansu province<br>(Trial )    | of frail<br>crowd                          | Powder                        |    |    |        |   |   |
| 9 |                                                                                                                                                                                                                                                                                                                                                                                                                                                                          | The prevention and<br>control of<br>COVID-19 in<br>Tianjin | Prevention<br>of close<br>contact<br>group | Chaihu<br>Dayuan<br>Decoction | 10 | 10 | 100.00 | 1 | 1 |

Platycodonis(桔梗,  
Jie Geng)10g,  
Cortex Magnoliae  
Officinalis(厚朴,  
Hou Pu)12g, Semen  
Arecae(槟榔, Bin  
Lang)18g, Flos  
Lonicerae(金银花,  
Jin Yin Hua)15g,  
RhizomaCyrtoniiF  
ortunei(贯众, Guan  
Zhong)10g  
Fructus Tsaoko(草  
果, Cao Guo)6g  
Pericarpium Citri  
Reticulatae  
Viride(青皮, Qing  
Pi)6g, Herba  
Eupatorii(佩兰, Pei  
Lan)10g, lotus  
petiole(荷梗, He  
Geng)6g, Radix  
Astragali seu  
Hedysari(黄芪,  
Huang Qi)18g ,  
Radix

|    |                                   |                                                                                                                                                                                                                                                                                                                                                                                                                   |                                                                           |                                 |                                              |     |     |             |                                               |                                                 |       |
|----|-----------------------------------|-------------------------------------------------------------------------------------------------------------------------------------------------------------------------------------------------------------------------------------------------------------------------------------------------------------------------------------------------------------------------------------------------------------------|---------------------------------------------------------------------------|---------------------------------|----------------------------------------------|-----|-----|-------------|-----------------------------------------------|-------------------------------------------------|-------|
| 10 | Hospital-made Prescription of TCM | <p>Glycyrrhizae(甘草, Gan Cao)6g<br/> Herba Ephedrae(生麻黄, Sheng Ma Huang)6g, Gypsum Fibrosum(生石膏, Sheng Shi Gao)15g, Semen Armeniacae Amarum(杏仁, Xing Ren)9g, Rhizoma et Radix Notopterygii(羌活, Qiang Huo)15g, Semen Lepidii(葶苈子, Ting Li Zi)15g, RhizomaCyrptomiiFortunei(贯众, Guan Zhong)15g, Lumbricus(地龙, Di Long)15g, Radix Cynanchi Paniculati(徐长卿, Xu Chang Qing)15g, Herba Agastaches(藿香, Huo Xiang)15g,</p> | The notification of the use of TCM agreement in the treatment of COVID-19 | Prevention of COVID-19 suspects | Maxing Shigan Decoction and Dayuan Decoction | 4/7 | 3/3 | 75.00/42.86 | Maxing Yigan Decoction: 1 Dayuan Decoction: 1 | Maxing Yigan Decoction : 1 Dayuan Decoction : 1 | 10txl |
|----|-----------------------------------|-------------------------------------------------------------------------------------------------------------------------------------------------------------------------------------------------------------------------------------------------------------------------------------------------------------------------------------------------------------------------------------------------------------------|---------------------------------------------------------------------------|---------------------------------|----------------------------------------------|-----|-----|-------------|-----------------------------------------------|-------------------------------------------------|-------|



Herba Eupatorii(佩  
 兰, Pei Lan)9g,  
 Rhizoma  
 Atractylodis(苍术,  
 Cang Shu)15g,  
 Poria(茯苓, Fu  
 Ling)45g, Rhizoma  
 Atractylodis  
 Macrocephalae(生  
 白术, Sheng Bai  
 Zhu)30g, (焦三仙,  
 Jiao San Xian)各  
 9g, Cortex  
 Magnoliae  
 Officinalis(厚朴,  
 Hou Pu)15g, Semen  
 Arecae(槟榔, Bin  
 Lang)9g, Fructus  
 Tsaoko(草果, Cao  
 Guo)9g, Rhizoma  
 Zingiberis  
 Recens(生姜, Sheng  
 Jiang)15g

|    |                                  |                                                     |                                                       |            |                      |   |   |        |   |   |       |
|----|----------------------------------|-----------------------------------------------------|-------------------------------------------------------|------------|----------------------|---|---|--------|---|---|-------|
| 11 | Modified<br>Yupingfeng<br>Powder | Radix Astragali seu<br>Hedysari(生黄芪,<br>Sheng Huang | Chinese medicine<br>prevention plan of<br>COVID-19 in | Prevention | Yupingfeng<br>Powder | 3 | 3 | 100.00 | 1 | 1 | 11SX2 |
|----|----------------------------------|-----------------------------------------------------|-------------------------------------------------------|------------|----------------------|---|---|--------|---|---|-------|

|                   |                         |                      |   |   |        |   |   |  |
|-------------------|-------------------------|----------------------|---|---|--------|---|---|--|
| 12                | Qi)15g, Rhizoma         | Shanxi province      |   |   |        |   |   |  |
|                   | Atractylodis            |                      |   |   |        |   |   |  |
|                   | Macrocephalae(炒         |                      |   |   |        |   |   |  |
|                   | 白术, Chao Bai            |                      |   |   |        |   |   |  |
|                   | Zhu)10g, Radix          |                      |   |   |        |   |   |  |
|                   | Saposhnikoviae(防        |                      |   |   |        |   |   |  |
|                   | 风, Fang Feng)6g,        |                      |   |   |        |   |   |  |
|                   | Bulbus Lili(百合,         |                      |   |   |        |   |   |  |
|                   | Bai He)30g, Herba       |                      |   |   |        |   |   |  |
|                   | Dendrobii(石斛, Shi       |                      |   |   |        |   |   |  |
|                   | Hu)10g, pear            |                      |   |   |        |   |   |  |
|                   | peel(梨皮, Li             |                      |   |   |        |   |   |  |
| Pi)30g, Radix     | Zhong Nanshan's<br>team | Shengjiang<br>Powder | 4 | 4 | 100.00 | 1 | 1 |  |
| Platycodonis(桔梗,  |                         |                      |   |   |        |   |   |  |
| Jie Geng)10g,     |                         |                      |   |   |        |   |   |  |
| Rhizoma           |                         |                      |   |   |        |   |   |  |
| Phragmitis(芦根,    |                         |                      |   |   |        |   |   |  |
| Lu Gen)30g, Radix |                         |                      |   |   |        |   |   |  |
| Glycyrrhizae(生甘   |                         |                      |   |   |        |   |   |  |
| 草, Sheng Gan      |                         |                      |   |   |        |   |   |  |
| Cao)6g            |                         |                      |   |   |        |   |   |  |
| Radix Bupleuri(柴  |                         |                      |   |   |        |   |   |  |
| 胡, Chai           |                         |                      |   |   |        |   |   |  |
| Hu)10g, Radix     |                         |                      |   |   |        |   |   |  |
| Astragali seu     |                         |                      |   |   |        |   |   |  |
| Hedysari(黄芪,      |                         |                      |   |   |        |   |   |  |

Huang Qi)10g,  
Semen Coicis(薏苡  
仁, Yi Yi  
Ren)15g,Rhizoma  
Atractylodis(苍术,  
Cang Shu)10g,  
Radix  
Ophiopogonis(麦  
冬, Mai Dong)15g,  
Radix Glehniae(北  
沙参, Bei Sha  
Shen)15g, Radix  
Glycyrrhizae(生甘  
草, Sheng Gan  
Cao)10g, Flos  
Lonicerae(金银花,  
Jin Yin  
Hua)15g, Bombyx  
Batryticatus(僵蚕,  
Jiang Can)10g,  
Periostracum  
Cicadae(蝉蜕, Chan  
Tui)5g, Radix et  
Rhizoma Rhei(大  
黄, Da  
Huang)5g, Rhizoma

13

Curcumae  
 Longae(姜黄, Jiang  
 Huang)10g  
 Radix Astragali seu  
 Hedysari(黄芪,  
 Huang Qi)10g,  
 Rhizoma  
 Atractylodis  
 Macrocephalae(炒  
 白术, Chao Bai  
 Zhu)10g, Radix  
 Saposhnikoviae(防  
 风, Fang Feng)6g,  
 Radix  
 Pseudostellariae(太  
 子参, Tai Zi  
 Shen)12g, Radix  
 Ophiopogonis(麦  
 冬, Mai Dong)10g,  
 Fructus  
 Forsythiae(连翘,  
 Lian Qiao)10g, Flos  
 Lonicerae(金银花,  
 Jin Yin Hua)15g,  
 Folium Perillae(紫  
 苏叶, Zi Su Ye)6g,

The prevention and  
 control of Winter  
 and Spring Flu 2020  
 and COVID-19 in  
 Shandong province

Prevention  
 for healthy  
 people

Yupingfeng  
 Powder and  
 Yinqiao  
 Powder

3/10

3/3

100.00/30.  
 00

Yupingfen  
 g Powder:  
 1 Yinqiao  
 Powder: 1

Yupingfen  
 g Powder:  
 1 Yinqiao  
 Powder: 0

13SD

|    |                                            |                                                                                                                                                                                                                                                                                                                                                                                        |                                                                                            |            |                   |   |   |        |   |   |      |
|----|--------------------------------------------|----------------------------------------------------------------------------------------------------------------------------------------------------------------------------------------------------------------------------------------------------------------------------------------------------------------------------------------------------------------------------------------|--------------------------------------------------------------------------------------------|------------|-------------------|---|---|--------|---|---|------|
| 14 | Prevention of coronary heart disease       | Radix Glycyrrhizae(甘草, Gan Cao)3g<br>Radix Codonopsis(党参, Dang Shen)12g,<br>Radix Ophiopogonis(麦冬, Mai Dong)9g,<br>Fructus Schisandrae Chinensis(五味子, Wu Wei Zi)3g,<br>Radix Salviae Miltiorrhizae(丹参, Dan Shen)9g, Flos Lonicerae(金银花, Jin Yin Hua)12g<br>Flos Lonicerae(金银花, Jin Yin Hua)9g, Radix Codonopsis(党参, Dang Shen)12g,<br>Rhizoma Atractylodis Macrocephalae(炒白术, Chao Bai | The prevention and control of Winter and Spring Flu 2020 and COVID-19 in Shandong province | Prevention | Shengjiang Powder | 3 | 3 | 100.00 | 1 | 1 | 14SD |
| 15 | Prevention of chronic respiratory diseases | Radix Codonopsis(党参, Dang Shen)12g,<br>Rhizoma Atractylodis Macrocephalae(炒白术, Chao Bai                                                                                                                                                                                                                                                                                                | The prevention and control of Winter and Spring Flu 2020 and COVID-19 in Shandong province | Prevention | Yupingfeng Powder | 3 | 3 | 100.00 | 0 | 1 | 15SD |

|    |                                                          |                                                                                                                                                                                                                                                                                                                                                 |                                                                   |            |                   |   |   |        |   |   |       |
|----|----------------------------------------------------------|-------------------------------------------------------------------------------------------------------------------------------------------------------------------------------------------------------------------------------------------------------------------------------------------------------------------------------------------------|-------------------------------------------------------------------|------------|-------------------|---|---|--------|---|---|-------|
| 16 | Partial cold constitution crowd square prevention square | Zhu)12g, Radix Saposhnikoviae(防风, Fang Feng)9g, Radix Glycyrrhizae(甘草, Gan Cao)6g Radix Astragali seu Hedysari(生黄芪, Sheng Huang Qi)15g, Rhizoma Atractylodis Macrocephalae(炒白术, Chao Bai Zhu)15g, Radix Saposhnikoviae(防风, Fang Feng)9g, Folium Perillae(紫苏叶, Zi Su Ye)9g, Herba Agastaches(藿香, Huo Xiang)9g, Radix Glycyrrhizae(甘草, Gan Cao)6g | The prevention and control of COVID-19 in Yunnan province (Trial) | Prevention | Yupingfeng Powder | 3 | 3 | 100.00 | 1 | 1 | 16YN  |
| 17 | Prevention for special                                   | Radix Astragali seu Hedysari(生黄芪,                                                                                                                                                                                                                                                                                                               | The prevention and control of                                     | Prevention | Yupingfeng Powder | 3 | 3 | 100.00 | 1 | 1 | 17HeN |

|    |                                                                                                                                                                                                                                                                                                                                                                                                                  |                                           |                                                          |                   |                                            |            |            |                     |                                               |                                               |             |
|----|------------------------------------------------------------------------------------------------------------------------------------------------------------------------------------------------------------------------------------------------------------------------------------------------------------------------------------------------------------------------------------------------------------------|-------------------------------------------|----------------------------------------------------------|-------------------|--------------------------------------------|------------|------------|---------------------|-----------------------------------------------|-----------------------------------------------|-------------|
| 18 | <p>population 2</p> <p>Sheng Huang Qi)15 克, Radix Saposhnikoviae(防风, Fang Feng)10 克, Rhizoma Atractylodis Macrocephalae(炒白术,Chao Bai Zhu)15 克, Radix Peucedani(前胡, Qian Hu)10 克, Herba Agastaches(藿香, Huo Xiang)10 克, Semen Coicis(生薏苡仁, Sheng Yi Yi Ren)15 克, Radix Glycyrrhizae(生甘草, Sheng Gan Cao)3 克 Cortex Mori(桑白皮, Sang Bai Pi)15 克, Cortex Lycii(地骨皮, Di Gu Pi)15 克, Radix Astragali seu Hedysari(生黄</p> | <p>COVID-19 in Henan province (Trial)</p> | <p>The prevention and control of COVID-19 in Tianjin</p> | <p>Prevention</p> | <p>Xiebai Powder and Yupingfeng Powder</p> | <p>4/3</p> | <p>3/3</p> | <p>75.00/100.00</p> | <p>Xiebai Powder: 1 Yupingfen g Powder: 1</p> | <p>Xiebai Powder: 1 Yupingfen g Powder: 1</p> | <p>18TJ</p> |
|----|------------------------------------------------------------------------------------------------------------------------------------------------------------------------------------------------------------------------------------------------------------------------------------------------------------------------------------------------------------------------------------------------------------------|-------------------------------------------|----------------------------------------------------------|-------------------|--------------------------------------------|------------|------------|---------------------|-----------------------------------------------|-----------------------------------------------|-------------|

|    |                              |                                                                                                                                                                                                                                                                                                                                |                                           |            |                     |     |     |               |                     |                     |       |
|----|------------------------------|--------------------------------------------------------------------------------------------------------------------------------------------------------------------------------------------------------------------------------------------------------------------------------------------------------------------------------|-------------------------------------------|------------|---------------------|-----|-----|---------------|---------------------|---------------------|-------|
|    |                              | 芪, Sheng Huang Qi)15 克, Rhizoma Phragmitis(芦根, Lu Gen)20 克, Radix Platycodonis(桔梗, Jie Geng)10 克, Rhizoma Atractylodis Macrocephalae(炒白术, Chao Bai Zhu)10 克, Radix Scrophulariae(玄参, Xuan She)20 克, Radix Scutellariae(黄芩, Huang Qin)10 克, Radix Glycyrrhizae(生甘草, Sheng Gan Cao)10 克, Radix Saposhnikoviae(防风, Fang Feng)10 克 |                                           |            |                     |     |     |               |                     |                     |       |
| 19 | Guizhi Decoction, Yupingfeng | Radix Astragali seu Hedysari(黄芪, Huang Qi),                                                                                                                                                                                                                                                                                    | The prevention and control of COVID-19 in | Prevention | Huangqi Guizhi Wuwu | 5/3 | 5/3 | 100.00/100.00 | Huangqi Guizhi Wuwu | Huangqi Guizhi Wuwu | 19HuN |





|    |                            |                                                                                                                                                                                                                                                                                                                                                                                               |                                                                                                   |            |                               |    |   |       |     |   |
|----|----------------------------|-----------------------------------------------------------------------------------------------------------------------------------------------------------------------------------------------------------------------------------------------------------------------------------------------------------------------------------------------------------------------------------------------|---------------------------------------------------------------------------------------------------|------------|-------------------------------|----|---|-------|-----|---|
| 21 | Prevention for the elderly | <p>克, Radix Saposhnikoviae(防风, Fang Feng)6 克, Rhizoma Atractylodis Macrocephalae(炒白术, Chao Bai Zhu)10 克, Folium Eriobotryae(枇杷叶, Pi Pa Ye)3 克, RhizomaCyrptomiiF ortunei(贯众, Guan Zhong)5 克, Fructus Jujubae(大枣, Da Zao)6 克, Radix Glycyrrhizae(甘草, Gan Cao)3 克 Radix Codonopsis(党参, Dang Shen)10g, Poria(茯苓, Fu Ling)15g, Rhizoma Atractylodis Macrocephalae(炒白术, Chao Bai Zhu)9g, Radix</p> | <p>The prevention and control of Winter and Spring Flu 2020 and COVID-19 in Shandong province</p> | Prevention | <p>Shenling Baizhu Powder</p> | 11 | 3 | 27.30 | 2/3 | 0 |
|----|----------------------------|-----------------------------------------------------------------------------------------------------------------------------------------------------------------------------------------------------------------------------------------------------------------------------------------------------------------------------------------------------------------------------------------------|---------------------------------------------------------------------------------------------------|------------|-------------------------------|----|---|-------|-----|---|



|    |                                         |                                                                                                                                                                                                                                      |                                                                                              |                                               |                                                        |      |     |                  |                                                             |                                                                   |        |
|----|-----------------------------------------|--------------------------------------------------------------------------------------------------------------------------------------------------------------------------------------------------------------------------------------|----------------------------------------------------------------------------------------------|-----------------------------------------------|--------------------------------------------------------|------|-----|------------------|-------------------------------------------------------------|-------------------------------------------------------------------|--------|
| 23 | Lianhuaqingwe<br>n Capsule<br>(Granule) | Anemarrhenae(知<br>母, Zhi Fu), Fructus                                                                                                                                                                                                | 1, The prevention<br>and control of<br>COVID-19 in<br>Shanxi province<br>(Trial)             | Treatment<br>Medical<br>observation<br>period | Maxing<br>Shigan<br>Decoction<br>and Yinqiao<br>Powder | 4/10 | 4/2 | 100.00/20.<br>00 | Maxing<br>Shigan<br>Decoction:<br>1<br>Yinqiao<br>Powder: 1 | Maxing<br>Shigan<br>Decoction<br>: 1<br>Yinqiao<br>Powder:<br>1/4 | 23lhqw |
|    |                                         | Arctii(牛蒡子, Niu<br>Bang Zi), Herba                                                                                                                                                                                                   |                                                                                              |                                               |                                                        |      |     |                  |                                                             |                                                                   |        |
|    |                                         | Artemisiae<br>Annuae(青蒿, Qing<br>Hao), Herba                                                                                                                                                                                         |                                                                                              |                                               |                                                        |      |     |                  |                                                             |                                                                   |        |
|    |                                         | Menthae<br>Heplocalycis(薄荷,<br>Bo He), Radix<br>Glycyrrhizae(甘草,<br>Gan Cao)<br>Fructus                                                                                                                                              | 2, Diagnosis and<br>treatment of<br>COVID-19(Trial<br>version 6)                             |                                               |                                                        |      |     |                  |                                                             |                                                                   |        |
|    |                                         | Forsythiae(连翘,<br>Lian Qiao), Flos<br>Lonicerae(金银花,<br>Jin Yin Hua), Herba<br>Ephedrae(麻黄, Ma<br>Huang), Semen<br>Armeniaca<br>Amarum(杏仁,<br>Xing Ren), Gypsum<br>Fibrosum(石膏, Shi<br>Gao), Radix<br>Isatidis(板蓝根,<br>Ban Lan Gen), | 3, The prevention<br>and control of<br>COVID-19 in<br>Hainan province<br>(The public version |                                               |                                                        |      |     |                  |                                                             |                                                                   |        |

|    |                                         |                                                                                                                                                                                                                                                                                                                                                                                           |                                                                                                |                                               |                                 |    |    |        |   |   |
|----|-----------------------------------------|-------------------------------------------------------------------------------------------------------------------------------------------------------------------------------------------------------------------------------------------------------------------------------------------------------------------------------------------------------------------------------------------|------------------------------------------------------------------------------------------------|-----------------------------------------------|---------------------------------|----|----|--------|---|---|
|    |                                         | <p>RhizomaCyrptomiiF<br/>ortunei(贯众, Guan<br/>Zhong), Herba<br/>Houttuyniae(鱼腥<br/>草, Yu Xing Cao),<br/>Herba<br/>Agastaches(藿香,<br/>Huo Xiang), Radix<br/>et Rhizoma Rhei(大<br/>黄, Da Huang),<br/>Herba Rhodiolae(红<br/>景天, Hong<br/>Jingtian), Herba<br/>Menthae<br/>Heplocalycis(薄荷,<br/>Bo He)脑, Radix<br/>Glycyrrhizae(甘草,<br/>Gan<br/>Cao).Excipients are<br/>starch.<br/>Radix</p> | of the second<br>edition of the trial)                                                         |                                               |                                 |    |    |        |   |   |
| 24 | Fangfengtongs<br>heng Pill<br>(Granule) | <p>Saposhnikoviaie(防<br/>风, Fang Feng),<br/>Herba<br/>Schizonepetae(荆<br/>芥, Jing Jie), Herba</p>                                                                                                                                                                                                                                                                                         | The prevention and<br>control of<br>COVID-19 in<br>Shanxi province<br>(Trial)<br>Diagnosis and | Treatment<br>Medical<br>observation<br>period | Fangfeng<br>Tongsheng<br>Powder | 17 | 17 | 100.00 | 1 | 1 |

Menthae  
Heplocalycis(薄荷,  
Bo He), Herba  
Ephedrae(麻黄, Ma  
Huang), Radix et  
Rhizoma Rhei(大  
黄, Da Huang),  
Natrii Sulfas(芒硝,  
Mang Xiao),  
Gardenia  
jasminoides Ellis(梔  
子, Zhi Zi),  
Talcum(滑石, Hua  
Shi), Radix  
Platycodonis(桔梗,  
Jie Geng), Gypsum  
Fibrosum(石膏, Shi  
Gao), Rhizoma  
Ligustici  
Chuanxiong(川芎,  
Chuan Qiong),  
Radix Angelicae  
Sinensis(当归,  
Dang Gui), Radix  
Scutellariae(黄芩,  
Huang Qin),

treatment of  
COVID-19(Trial  
version 4)



|    |                                                       |                                                                                                                                                                                                                                                                                                                                                                                                                                 |                       |            |                                            |       |     |             |                                                 |                                                   |         |
|----|-------------------------------------------------------|---------------------------------------------------------------------------------------------------------------------------------------------------------------------------------------------------------------------------------------------------------------------------------------------------------------------------------------------------------------------------------------------------------------------------------|-----------------------|------------|--------------------------------------------|-------|-----|-------------|-------------------------------------------------|---------------------------------------------------|---------|
| 26 | Prevention for adults (Professor Gu Xiaohong of BUCM) | <p>苓, Fu Ling),<br/>Pericarpium<br/>Arecae(大腹皮, Da Fu Pi), Rhizoma<br/>Pinelliae(生半夏, Sheng Ban Xia),<br/>Radix<br/>Glycyrrhizae(甘草, Gan Cao), Herba<br/>Agastaches(藿香, Huo Xiang), Folium<br/>Perillae(紫苏叶, Zi Su Ye)<br/>Radix Astragali seu Hedysari(生黄芪, Sheng Huang Qi)9g, Flos<br/>Lonicerae(金银花, Jin Yin Hua)9g,<br/>Fructus<br/>Forsythiae(连翘, Lian Qiao)9g,<br/>Herba<br/>Agastaches(藿香, Huo Xiang)6g,<br/>Rhizoma</p> | Professor Gu Xiaohong | Prevention | Yinqiao Powder and Huoxiang Zhengqi Powder | 10/13 | 4/6 | 40.00/46.15 | Yinqiao Powder: 1<br>Huoxiang Zhengqi Powder: 1 | Yinqiao Powder: 0<br>Huoxiang Zhengqi Powder: 2/4 | 26bucmg |
|----|-------------------------------------------------------|---------------------------------------------------------------------------------------------------------------------------------------------------------------------------------------------------------------------------------------------------------------------------------------------------------------------------------------------------------------------------------------------------------------------------------|-----------------------|------------|--------------------------------------------|-------|-----|-------------|-------------------------------------------------|---------------------------------------------------|---------|



|    |                                         |                                                                                                                                                                                                                                                                                                                                                                                           |                       |            |                |    |   |       |   |   |         |
|----|-----------------------------------------|-------------------------------------------------------------------------------------------------------------------------------------------------------------------------------------------------------------------------------------------------------------------------------------------------------------------------------------------------------------------------------------------|-----------------------|------------|----------------|----|---|-------|---|---|---------|
| 27 | Prevention for children and adolescents | <p>Atractylodis(苍术, Cang Shu)6g, Cortex Magnoliae Officinalis(厚朴, Hou Pu)6g, Pericarpium Citri Reticulatae(陈皮, Chen Pi)6g, Poria(茯苓, Fu Ling)9g, Radix Platycodonis(桔梗, Jie Geng)6g, Rhizoma Phragmitis(芦根, Lu Gen)15g Herba Agastaches(藿香, Huo Xiang)3g, Semen Raphani(莱菔子, Lai Fu Zi)6g, Pericarpium Citri Reticulatae(陈皮, Chen Pi)3g, Poria(茯苓, Fu Ling)6g, Radix Platycodonis(桔梗,</p> | Professor Gu Xiaohong | Prevention | Yinqiao Powder | 10 | 4 | 40.00 | 1 | 0 | 27bucmg |
|----|-----------------------------------------|-------------------------------------------------------------------------------------------------------------------------------------------------------------------------------------------------------------------------------------------------------------------------------------------------------------------------------------------------------------------------------------------|-----------------------|------------|----------------|----|---|-------|---|---|---------|

|    |                                       |                                                                                                                                                                                                                                                                                                                                                                                                                                                                                           |                                                                                                                                      |            |                                               |      |     |                 |      |
|----|---------------------------------------|-------------------------------------------------------------------------------------------------------------------------------------------------------------------------------------------------------------------------------------------------------------------------------------------------------------------------------------------------------------------------------------------------------------------------------------------------------------------------------------------|--------------------------------------------------------------------------------------------------------------------------------------|------------|-----------------------------------------------|------|-----|-----------------|------|
| 28 | Prevention<br>(general<br>population) | <p>Jie Geng)3g, Flos<br/>Lonicerae(金银花,<br/>Jin Yin Hua)6g,<br/>Fructus<br/>Forsythiae(连翘,<br/>Lian Qiao)6g,<br/>Rhizoma<br/>Phragmitis(芦根,<br/>Lu Gen)9g, Radix<br/>Scrophulariae(玄参,<br/>Xuan She)6g<br/>Flos Lonicerae(金<br/>银花, Jin Yin<br/>Hua)10g Fructus<br/>Forsythiae(连翘,<br/>Lian Qiao)10g<br/>Radix<br/>Saposhnikoviae(防<br/>风, Fang Feng)10g<br/>Herba Menthae<br/>Heplocalycis(薄荷,<br/>Bo He)10g Herba<br/>Agastaches(藿香,<br/>Huo Xiang)10g<br/>Rhizoma<br/>Atractylodis</p> | <p>Technical<br/>guidelines for TCM<br/>prevention and<br/>control of<br/>COVID-19 in<br/>Sichuan province<br/>(Revised edition)</p> | Prevention | Yinqiao<br>Powder and<br>Yupingfeng<br>Powder | 10/4 | 3/2 | 30.00/50.0<br>0 | 28SC |
|----|---------------------------------------|-------------------------------------------------------------------------------------------------------------------------------------------------------------------------------------------------------------------------------------------------------------------------------------------------------------------------------------------------------------------------------------------------------------------------------------------------------------------------------------------|--------------------------------------------------------------------------------------------------------------------------------------|------------|-----------------------------------------------|------|-----|-----------------|------|

|    |                           |                                                                                                                                                                                                                                                                                                                                                                                                                                          |                                                                                                                     |            |                                      |      |     |              |                                         |                                           |      |
|----|---------------------------|------------------------------------------------------------------------------------------------------------------------------------------------------------------------------------------------------------------------------------------------------------------------------------------------------------------------------------------------------------------------------------------------------------------------------------------|---------------------------------------------------------------------------------------------------------------------|------------|--------------------------------------|------|-----|--------------|-----------------------------------------|-------------------------------------------|------|
| 29 | Prevention (for the weak) | <p>Macrocephalae(生白术, Sheng Bai Zhu)10g</p> <p>Radix Astragali seu Hedysari(黄芪, Huang Qi)15g</p> <p>Radix Saposhnikoviae(防风, Fang Feng)10g</p> <p>Flos Lonicerae(金银花, Jin Yin Hua)10g</p> <p>Fructus Forsythiae(连翘, Lian Qiao)10g</p> <p>Herba Menthae Heplocalycis(薄荷, Bo He)10g</p> <p>Herba Agastaches(藿香, Huo Xiang)10g</p> <p>Rhizoma Atractylodis Macrocephalae(炒白术, Chao Bai Zhu)10g</p> <p>Fructus Aurantii(枳壳, Zhi Qiao)10g</p> | <p><b>Technical guidelines for TCM prevention and control of COVID-19 in Sichuan province (Revised edition)</b></p> | Prevention | Yupingfeng Powder and Yinqiao Powder | 3/10 | 3/3 | 100.00/30.00 | Yupingfen g Powder: 1 Yinqiao Powder: 1 | Yupingfen g Powder: 1 Yinqiao Powder: 1/4 | 29SC |
|----|---------------------------|------------------------------------------------------------------------------------------------------------------------------------------------------------------------------------------------------------------------------------------------------------------------------------------------------------------------------------------------------------------------------------------------------------------------------------------|---------------------------------------------------------------------------------------------------------------------|------------|--------------------------------------|------|-----|--------------|-----------------------------------------|-------------------------------------------|------|

|    |                                                                                  |                                                                                                                                                                                                                                                                       |                                                                                                                       |                               |                                                          |            |            |                         |       |       |                |
|----|----------------------------------------------------------------------------------|-----------------------------------------------------------------------------------------------------------------------------------------------------------------------------------------------------------------------------------------------------------------------|-----------------------------------------------------------------------------------------------------------------------|-------------------------------|----------------------------------------------------------|------------|------------|-------------------------|-------|-------|----------------|
| 30 | Prevention<br>(children)                                                         | Flos Lonicerae(金银花, Jin Yin Hua)10g, Fructus Forsythiae(连翘, Lian Qiao)10g, Herba Schizonepetae(荆芥, Jing Jie)10g, Herba Menthae Heplocalycis(薄荷, Bo He)10g, Radix Isatidis(板蓝根, Ban Lan Gen)10g, Rhizoma Phragmitis(芦根, Lu Gen)10g, Herba Agastaches(藿香, Huo Xiang)10g | Technical guidelines for TCM prevention and control of COVID-19 in Sichuan province (Revised edition)                 | Prevention                    | Yinqiao Powder                                           | 10         | 5          | 50.00                   | 1     | 2/4   | 30SC           |
| 31 | Pneumonia IV (Sini with Renshen Decoction, Angong Niu Huang Pills, Zixue Powder) | Radix Ginseng(人参, Ren Shen)10g, Radix Aconiti Lateralis Preparata(附子, Fu Zi)10g, Angong Niu Huang Pills(安宫牛黄丸) or Zixue                                                                                                                                               | Agreement on the prevention and treatment of COVID-19 in hubei hospital of traditional Chinese medicine (1st edition) | Treatment<br>Critical illness | Shenfu Decoction and Angong Niu Huang Pills or Zixue Dan | 2/11 or 15 | 2/11 or 15 | 100.00/100.00 or 100.00 | 1/1/1 | 1/1/1 | 31pneumonia IV |





|    |                                                                              |                                                                                                                                                                                                                                                                                                                                                                                                       |                                   |                                                                        |                  |              |                                |         |         |       |  |
|----|------------------------------------------------------------------------------|-------------------------------------------------------------------------------------------------------------------------------------------------------------------------------------------------------------------------------------------------------------------------------------------------------------------------------------------------------------------------------------------------------|-----------------------------------|------------------------------------------------------------------------|------------------|--------------|--------------------------------|---------|---------|-------|--|
|    |                                                                              | Schisandrae<br>Chinensis(五味子, Wu Wei Zi),<br>Rhizoma<br>Phragmitis(芦根,<br>Lu Gen), Radix<br>Glycyrrhizae(生甘草, Sheng Gan Cao)<br>Radix Ginseng(人参, Ren Shen),<br>Radix Aconiti<br>Lateralis<br>Preparata(附子, Fu<br>Zi), Fructus<br>Corni(山茱萸, Shan<br>Zhu Yu),<br>tabasheer(天竺黄,<br>Tian<br>Zhuhuang)Decoction<br>and Angong<br>Niuhuang Pills(安<br>宫牛黄丸) or Zixue<br>Dan(紫雪丹) Smell<br>with your nose |                                   |                                                                        |                  |              |                                |         |         |       |  |
| 34 | Sini with<br>Renshen<br>Decoction,<br>Angong<br>Niuhuang Pills,<br>Zixue Dan | The prevention and<br>control of<br>COVID-19 in<br>Gansu province<br>(Trial)                                                                                                                                                                                                                                                                                                                          | Treatment/<br>Critical<br>illness | Shenfu<br>Decoction<br>and Angong<br>Niuhuang<br>Pills or<br>Zixue Dan | 2/11or16         | 2/11or16     | 100.00/100<br>.00 or<br>100.00 | 1/1/1   | 1/1/1   | 34GS  |  |
| 35 |                                                                              | The prevention and<br>control of                                                                                                                                                                                                                                                                                                                                                                      | Treatment/<br>Critical            | Shenfu<br>Decoction                                                    | 2/15or11or2<br>1 | 2/15or11or21 | 100.00/100<br>.00 or           | 1/1/1/1 | 1/1/1/1 | 35SX1 |  |

|    |                                                                                                                                                                                                                                                                                                                                                                                              |                                                                                                             |                            |                                                                       |          |          |                         |       |       |  |        |      |
|----|----------------------------------------------------------------------------------------------------------------------------------------------------------------------------------------------------------------------------------------------------------------------------------------------------------------------------------------------------------------------------------------------|-------------------------------------------------------------------------------------------------------------|----------------------------|-----------------------------------------------------------------------|----------|----------|-------------------------|-------|-------|--|--------|------|
|    | Radix Aconiti Lateralis Preparata(附子, Fu Zi) 10g(First decoction), Fructus Corni(山茱萸, Shan Zhu Yu) 15g, Suhexiang pills(苏合香丸) or Angong Niuhuang Pills(安宫牛黄丸) or Shexiang Niuhuang(麝香牛黄丸) Pills Radix Ginseng(生晒参, Sheng Shai Shen)20-30g, Radix Aconiti Lateralis Preparata(附子, Fu Zi)(First decoction)30-60g, Fructus Corni(山茱萸, Shan Zhu Yu)15-20g, Angong Niuhuang Pills(安宫牛黄丸) or Zixue | COVID-19 in Shanxi province (Trial)                                                                         | illness                    | and Suhexiang Pill or Angong Niuhuang Pills or Shexiang Niuhuang Pill |          |          |                         |       |       |  | 100.00 |      |
| 36 | Sini with Renshen Decoction (Shenfu Decoction),Angong Niuhuang Pills,Zixue Powder                                                                                                                                                                                                                                                                                                            | The Prescription for the intervention of TCM intervention of COVID-19 in sichuan province (Trial version 1) | Treatment/Critical illness | Shenfu Decoction and Angong Niuhuang Pills or Zixue Dan               | 2/11or15 | 2/11or15 | 100.00/100.00 or 100.00 | 1/1/1 | 1/1/1 |  |        | 36SC |



|    |                                 |                                                                                                                                                                                                                                                                                                                                                                                                                                                                                                 |                                                                                               |                                                          |                               |   |   |        |   |   |      |
|----|---------------------------------|-------------------------------------------------------------------------------------------------------------------------------------------------------------------------------------------------------------------------------------------------------------------------------------------------------------------------------------------------------------------------------------------------------------------------------------------------------------------------------------------------|-----------------------------------------------------------------------------------------------|----------------------------------------------------------|-------------------------------|---|---|--------|---|---|------|
|    |                                 | Powder.people of<br>Yang burst can use<br>Shenfu Injection by<br>Intravenous<br>injection<br>Radix Ginseng(人<br>参, Ren Shen),<br>Radix Aconiti<br>Lateralis<br>Preparata(附子, Fu<br>Zi), Bone fossil of<br>big mammals(煅龙<br>骨, Duan Long Gu),<br>Oyster(煅牡蛎,<br>Duan Mu Li)<br>Radix Ginseng<br>Rubra(红参, Hong<br>Shen)10g, Radix<br>Aconiti Lateralis<br>Preparata(附子, Fu<br>Zi)10g(First<br>decoction), Fructus<br>Corni(山茱萸, Shan<br>Zhu Yu)30g, Radix<br>Ophiopogonis(麦<br>冬, Mai Dong)20g, | The prevention and<br>control of<br>COVID-19 in<br>Hunan province<br>(Trial version 3)        | Treatment/<br>Critical<br>illness                        | Shenfulong<br>mu<br>Decoction | 4 | 4 | 100.00 | 1 | 1 |      |
| 37 | Shenfulongmu<br>Decoction       |                                                                                                                                                                                                                                                                                                                                                                                                                                                                                                 |                                                                                               |                                                          |                               |   |   |        |   |   |      |
| 38 | Modified<br>Shenfu<br>Decoction |                                                                                                                                                                                                                                                                                                                                                                                                                                                                                                 | The prevention and<br>control of<br>COVID-19 in<br>Guangdong<br>province (Trial<br>version 1) | Treatment/<br>Critical<br>illness<br>(critical<br>phase) | Shenfu<br>Decoction           | 2 | 2 | 100.00 | 1 | 1 | 38GD |

|    |                                                                                                   |                                                                                                                                                                                                                                                                                                                                                                                                                                          |                                                                                 |            |                                                                        |          |          |                                |   |   |      |
|----|---------------------------------------------------------------------------------------------------|------------------------------------------------------------------------------------------------------------------------------------------------------------------------------------------------------------------------------------------------------------------------------------------------------------------------------------------------------------------------------------------------------------------------------------------|---------------------------------------------------------------------------------|------------|------------------------------------------------------------------------|----------|----------|--------------------------------|---|---|------|
| 39 |                                                                                                   | Radix<br>Notoginseng(三七,<br>San Qi)10g<br>Radix Ginseng(人<br>参, Ren Shen),<br>Radix Aconiti<br>Lateralis<br>Preparata(附子, Fu<br>Zi), Fructus<br>Corni(山茱萸, Shan<br>Zhu Yu), Angong<br>Niuhuang Pills(安<br>宫牛黄丸) or Zixue<br>Powder(紫雪散)<br>Radix Ginseng(人<br>参, Ren Shen),<br>Radix Aconiti<br>Lateralis<br>Preparata(附子, Fu<br>Zi), Fructus<br>Corni(山茱萸, Shan<br>Zhu Yu), Angong<br>Niuhuang Pills(安<br>宫牛黄丸) or Zixue<br>Powder(紫雪散) | The prevention and<br>control of<br>COVID-19 in<br>Yunnan province<br>(Trial )  |            | Shenfu<br>Decoction<br>and Angong<br>Niuhuang<br>Pills or<br>Zixue Dan | 2/11or16 | 2/11or16 | 100.00/100<br>.00 or<br>100.00 | 1 | 1 | 39YN |
| 40 | Sini with<br>Renshen<br>Decoction<br>(Shenfu<br>Decoction),An<br>gong Niuhuang<br>Pills,Zixue Dan | Radix Aconiti<br>Lateralis<br>Preparata(附子, Fu<br>Zi), Fructus<br>Corni(山茱萸, Shan<br>Zhu Yu), Angong<br>Niuhuang Pills(安<br>宫牛黄丸) or Zixue<br>Powder(紫雪散)                                                                                                                                                                                                                                                                                | The prevention and<br>control of<br>COVID-19 in<br>Jiangxi province<br>(Trial ) |            | Shenfu<br>Decoction<br>and Angong<br>Niuhuang<br>Pills or<br>Zixue Dan | 2/11or16 | 2/11or16 | 100.00/100<br>.00 or<br>100.00 | 1 | 1 | 40JX |
| 41 |                                                                                                   | Radix Ginseng(人                                                                                                                                                                                                                                                                                                                                                                                                                          | Diagnosis and                                                                   | Treatment/ | Shenfu                                                                 | 2/15or11 | 2/15or11 | 100.00/100                     | 1 | 1 | 41 4 |

|    |                       |                                                                                                                                                                                                                 |                                                                                                                                                                                                      |                                   |                                                                         |   |   |                  |   |   |  |         |
|----|-----------------------|-----------------------------------------------------------------------------------------------------------------------------------------------------------------------------------------------------------------|------------------------------------------------------------------------------------------------------------------------------------------------------------------------------------------------------|-----------------------------------|-------------------------------------------------------------------------|---|---|------------------|---|---|--|---------|
|    |                       | 参, Ren Shen)15g,<br>Radix Aconiti<br>Lateralis<br>Preparata(附子, Fu<br>Zi)10g(First<br>decoction), Fructus<br>Corni(山茱萸, Shan<br>Zhu Yu)15g,<br>Suhexiang pills(苏<br>合香丸) or Angong<br>Niuhuang Pills(安<br>宫牛黄丸) | treatment of<br>COVID-19(Trial<br>version 4)                                                                                                                                                         | Critical<br>illness               | Decoction<br>and<br>Suhexiang<br>Pill or<br>Angong<br>Niuhuang<br>Pills |   |   | .00 or<br>100.00 |   |   |  |         |
| 42 | Shenfu<br>Injection   | Radix Ginseng<br>Rubra(红参, Hong<br>Shen), 附片(Radix<br>Aconiti Lateralis<br>Preparata(附子, Fu<br>Zi).Excipients:Polys<br>orbate 80g                                                                               | 1, The Prescription<br>for the intervention<br>of TCM<br>intervention of<br>COVID-19 in<br>Sichuan province<br>(Trial version 1)<br>2, Diagnosis and<br>treatment of<br>COVID-19(Trial<br>version 6) | Treatment/<br>Critical<br>illness | Shenfu<br>Decoction                                                     | 2 | 2 | 100.00           | 1 | 1 |  | 42SC/6  |
| 43 | Shengmai<br>Injection | Radix Ginseng<br>Rubra(红参, Hong<br>Shen), Radix                                                                                                                                                                 | The prevention and<br>control of<br>COVID-19 in                                                                                                                                                      |                                   | Shengjiang<br>Powder                                                    | 3 | 3 | 100.00           | 1 | 1 |  | 43SX1/6 |

|    |                                                           |                                                                                                                                                               |                                                                                                                        |                                        |     |     |               |                      |                       |         |
|----|-----------------------------------------------------------|---------------------------------------------------------------------------------------------------------------------------------------------------------------|------------------------------------------------------------------------------------------------------------------------|----------------------------------------|-----|-----|---------------|----------------------|-----------------------|---------|
|    |                                                           | Ophiopogonis(麦冬, Mai Dong), Fructus Schisandrae Chinensis(五味子, Wu Wei Zi)                                                                                     | Shanxi province (Trial )<br>Diagnosis and treatment of COVID-19(Trial version 6)                                       |                                        |     |     |               |                      |                       |         |
| 44 | Shenmai Injection                                         | Radix Ginseng Rubra(红参, Hong Shen), Radix Ophiopogonis(麦冬, Mai Dong)<br>Flos Carthami(红花, Hong Hua),<br>Radix Paeoniae Rubra(赤芍, Chi Shao), Rhizoma Ligustici | Diagnosis and treatment of COVID-19(Trial version 6)                                                                   | Shengjiang Powder                      | 3   | 2   | 66.70         | 1                    | 1                     | 44 6    |
| 45 | Xuebijing Injection, Shenfu Injection, Shengmai Injection | Chuanxiong(川芎, Chuan Qiong), Radix Salviae Miltiorrhizae(丹参, Dan Shen), Radix Angelicae Sinensis(当归, Dang Gui), Radix Ginseng Rubra(红                         | The prevention and control of COVID-19 in Shanxi province (Trial)/Diagnosis and treatment of COVID-19(Trial version 5) | Shenfu Decoction and Shengjiang Powder | 2/3 | 2/3 | 100.00/100.00 | Shenfu Decoction: 1  | Shenfu Decoction : 1  | 45SX1/5 |
|    |                                                           |                                                                                                                                                               |                                                                                                                        |                                        |     |     |               | Shengjiang Powder: 1 | Shengjian g Powder: 1 |         |

|    |                           |                                                                                                                                                                                                                                                                                                                                                                                                                                                      |                              |    |    |        |   |   |
|----|---------------------------|------------------------------------------------------------------------------------------------------------------------------------------------------------------------------------------------------------------------------------------------------------------------------------------------------------------------------------------------------------------------------------------------------------------------------------------------------|------------------------------|----|----|--------|---|---|
| 46 | Angong<br>Niu Huang Pills | 参, Hong Shen), 附<br>片(Radix Aconiti<br>Lateralis<br>Preparata(附子, Fu<br>Zi)), Radix<br>Ophiopogonis(麦<br>冬, Mai Dong),<br>Fructus Schisandrae<br>Chinensis(五味<br>子, Wu Wei Zi)<br>Calculus Bovis(牛<br>黄, Niu Huang),<br>Cornu Bubali(水牛<br>角, Shui Niu<br>Jiao)Concentrated<br>Powder,<br>Moschus(Moschus(<br>麝香, She<br>Xiang),She Xiang),<br>Margarita(珍珠,<br>Zhen Zhu),<br>Cinnabaris(朱砂,<br>Zhu Sha),<br>Realgar(雄黄,<br>Xiong Huang),<br>Rhizoma | Angong<br>Niu Huang<br>Pills | 11 | 11 | 100.00 | 1 | 1 |
|----|---------------------------|------------------------------------------------------------------------------------------------------------------------------------------------------------------------------------------------------------------------------------------------------------------------------------------------------------------------------------------------------------------------------------------------------------------------------------------------------|------------------------------|----|----|--------|---|---|

|    |           |                                                                                                                                                                                                                                                                                                                                                                                                                                                                        |           |    |    |        |   |   |
|----|-----------|------------------------------------------------------------------------------------------------------------------------------------------------------------------------------------------------------------------------------------------------------------------------------------------------------------------------------------------------------------------------------------------------------------------------------------------------------------------------|-----------|----|----|--------|---|---|
| 47 | Zixue Dan | Coptidis(黄连,<br>Huang Lian), Radix<br>Scutellariae(黄芩,<br>Huang Qin),<br>Gardenia<br>jasminoides Ellis(梔<br>子, Zhi Zi), Radix<br>Curcumae(郁金, Yu<br>Jin), Borneolum<br>Syntheticum(冰片,<br>Bing Pian)<br>Gypsum<br>Fibrosus(石膏, Shi<br>Gao), Calcitum(寒<br>水石, Han Shui<br>Shi),<br>Magnetitum(磁石,<br>Ci Shi), Talcum(滑<br>石, Hua Shi),<br>Rhinoceros<br>unicornis L. (犀角,<br>Xi Jiao), Cornu<br>Saigae Tataricae(羚<br>羊角, Ling Yang<br>Jiao), Radix<br>Aucklandiae(木香, | Zixue Dan | 16 | 16 | 100.00 | 1 | 1 |
|----|-----------|------------------------------------------------------------------------------------------------------------------------------------------------------------------------------------------------------------------------------------------------------------------------------------------------------------------------------------------------------------------------------------------------------------------------------------------------------------------------|-----------|----|----|--------|---|---|

Mu Xiang), Lignum  
 Aquilariae  
 Resinatum(沉香,  
 chenxiang),  
 Scrophularianingpo  
 ensis Hemsl.(元参,  
 Yuan Shen),  
 Rhizoma  
 Cimicifugae(升麻,  
 Sheng Ma), Radix  
 Glycyrrhizae(甘草,  
 Gan Cao), Flos  
 Caryophylli(丁香,  
 Ding Xiang),  
 mirabilite(朴硝, Po  
 Xiao), saltpetre(硝  
 石, Xiao Shi),  
 Moschus(Moschus(  
 麝香, She  
 Xiang), She Xiang),  
 Cinnabaris(朱砂,  
 Zhu Sha)  
 Gypsum  
 Fibrosum(生石膏,  
 Sheng Shi  
 Gao)30-60g(First

Diagnosis and  
 treatment of  
 COVID-19 (Trial  
 version 7)

Treatment/  
 Critical  
 illness

Qingwenbai  
 du Decoction

14

11

78.60

8/10

1

decoction),

Rhizoma

Anemarrhenae(知  
母, Zhi Fu)30g,

Radix Rehmanniae

Recens(生地, Sheng  
Di)30-60g, Cornu

Bubali(水牛角,

Shui Niu

Jiao)30g(First

decoction), Radix

Paeoniae Rubra(赤  
芍, Chi Shao)30g,

Radix

Scrophulariae(玄参,

Xuan She)30g,

Fructus

Forsythiae(连翘,

Lian Qiao)15g,

Moutan Cortex(丹

皮, Dan Pi)15g,

Rhizoma

Coptidis(黄连,

Huang Lian)6g,

Lophatherum

gracile(淡竹叶, Dan



|    |                                              |                                                                                                                                                                                                                                                                                                                                                                                                                                                       |           |                                                        |       |     |                 |                                                                |                                                                    |                  |  |  |  |
|----|----------------------------------------------|-------------------------------------------------------------------------------------------------------------------------------------------------------------------------------------------------------------------------------------------------------------------------------------------------------------------------------------------------------------------------------------------------------------------------------------------------------|-----------|--------------------------------------------------------|-------|-----|-----------------|----------------------------------------------------------------|--------------------------------------------------------------------|------------------|--|--|--|
|    |                                              | Zhu Ye)12g, Semen<br>Lepidii(葶苈子,<br>Ting Li Zi)15g,<br>Radix<br>Glycyrrhizae(生甘<br>草, Sheng Gan<br>Cao)6g<br>Flos Lonicerae(金<br>银花, Jin Yin<br>Hua)30g, Fructus<br>Forsythiae(连翘,<br>Lian Qiao)30g,<br>Herba<br>Schizonepetae(荆<br>芥, Jing Jie)15g,<br>Fructus Arctii(牛蒡<br>子, Niu Bang<br>Zi)15g, Herba<br>Menthae<br>Heplocalycis(薄荷,<br>Bo He)15g, Radix<br>Platycodonis(桔梗,<br>Jie Geng)30g,<br>Semen Armeniacae<br>Amarum(杏仁,<br>Xing Ren)15g, |           |                                                        |       |     |                 |                                                                |                                                                    |                  |  |  |  |
| 49 | Yinqiaohuopo<br>Antipyretic<br>(COVID-19 II) | Hospital of chengdu<br>university of<br>Chinese medicine<br>(Sichuan central<br>hospital)                                                                                                                                                                                                                                                                                                                                                             | Treatment | Yinqiao<br>Powder and<br>Huopu<br>Xialing<br>Decoction | 10/11 | 7/7 | 70.00/63.6<br>0 | Yinqiao<br>Powder: 1,<br>Huopu<br>Xialing<br>Decoction:<br>3/4 | Yinqiao<br>Powder:<br>3/4,<br>Huopu<br>Xialing<br>Decoction<br>: 1 | 49COVID19<br>2th |  |  |  |

Herba

Agastaches(藿香,

Huo Xiang)15g,

Cortex Magnoliae

Officinalis(厚朴,

Hou Pu)15g,

Poria(茯苓, Fu

Ling)30g, 法

Rhizoma

Pinelliae(半夏, Ban

Xia)15g, Fructus

Amomi

Rotundus(Fructus

Amomi

Rotundus(豆蔻,

Dou Kou), Dou

Kou)15g, Semen

Coicis(薏苡仁, Yi

Yi Ren)30g, Semen

Dolichoris

Album(白扁豆, Bai

Bian Dou)30g,

Crataegus

pinnatifida(焦山楂,

Jiao Shan Zha)30g,

(建曲, Jian Qu)15g,



|    |                                     |                                                                                                                                                                                                                                                                                                                                                                                                                                                         |                                                                                        |                                            |                                              |      |     |                  |                                                       |                                                         |       |
|----|-------------------------------------|---------------------------------------------------------------------------------------------------------------------------------------------------------------------------------------------------------------------------------------------------------------------------------------------------------------------------------------------------------------------------------------------------------------------------------------------------------|----------------------------------------------------------------------------------------|--------------------------------------------|----------------------------------------------|------|-----|------------------|-------------------------------------------------------|---------------------------------------------------------|-------|
| 51 | Sangju<br>Decoction, Yinqiao Powder | Gypsum<br>Fibrosum(生石膏,<br>Sheng Shi<br>Gao)(First<br>decoction), Semen<br>Armeniacae<br>Amarum(杏仁,<br>Xing Ren), Radix<br>Bupleuri(柴胡, Chai<br>Hu), Periostracum<br>Cicadae(蝉蜕, Chan<br>Tui), Radix<br>Glycyrrhizae(甘草,<br>Gan Cao)<br>Folium Mori(桑叶,<br>Sang Ye), Flos<br>Chrysanthemi(菊花,<br>Ju Hua), Radix<br>Platycodonis(桔梗,<br>Jie Geng), 苦<br>Semen Armeniacae<br>Amarum(杏仁,<br>Xing Ren), Fructus<br>Forsythiae(连翘,<br>Lian Qiao),<br>Rhizoma | The prevention and<br>control of<br>COVID-19 in<br>Hunan province<br>(Trial version 3) | Treatment/<br>Fever in the<br>early period | Sangju<br>Decoction<br>and Yinqiao<br>Powder | 8/10 | 8/9 | 100.00/90.<br>00 | Sangju<br>Decoction:<br>1<br><br>Yinqiao<br>Powder: 1 | Sangju<br>Decoction<br>: 1<br>Yinqiao<br>Powder:<br>3/4 | 51HuN |
|----|-------------------------------------|---------------------------------------------------------------------------------------------------------------------------------------------------------------------------------------------------------------------------------------------------------------------------------------------------------------------------------------------------------------------------------------------------------------------------------------------------------|----------------------------------------------------------------------------------------|--------------------------------------------|----------------------------------------------|------|-----|------------------|-------------------------------------------------------|---------------------------------------------------------|-------|



Cao), Radix  
 Bupleuri(柴胡,Chai  
 Hu), Radix  
 Scutellariae(黄  
 芩,Huang Qin),  
 Fructus  
 Forsythiae(连翘,  
 Lian Qiao),  
 RhizomaCyrtomiiF  
 ortunei(贯众,Guan  
 Zhong), Folium  
 Isatidis(大青叶,Da  
 Qing Ye), Fructus  
 Arctii(牛蒡子,Niu  
 Bang Zi), Rhizoma  
 Atractylodis(苍  
 术,Cang Shu),  
 Fructus Tsaoko(草  
 果,Cao Guo)

|    |                                                                                                                     |                                                                                                                    |                                                                                                                                     |                                                    |                                                                   |      |      |                   |                                                                      |                                                                         |       |
|----|---------------------------------------------------------------------------------------------------------------------|--------------------------------------------------------------------------------------------------------------------|-------------------------------------------------------------------------------------------------------------------------------------|----------------------------------------------------|-------------------------------------------------------------------|------|------|-------------------|----------------------------------------------------------------------|-------------------------------------------------------------------------|-------|
| 53 | Huopu Xialing<br>Decoction and<br>Maxing Yigan<br>Decoction,Qing<br>kailing oral<br>liquid,Tongxua<br>n Lifei Pills | Herba<br>Agastaches(藿香,<br>Huo Xiang)6g,<br>Rhizoma<br>Pinelliae(半夏, Ban<br>Xia)4.5g, light red<br>Indian Bread(赤茯 | The prevention and<br>control of<br>COVID-19 in<br>Hainan province<br>(The public version<br>of the second<br>edition of the trial) | Treatment/<br>Early<br>stage/Progr<br>essive stage | Huopu<br>Xialing<br>Decoction<br>and Maxing<br>Yigan<br>Decoction | 11/4 | 11/4 | 100.00/100<br>.00 | Huopu<br>Xialing<br>Decoction:<br>1<br>Maxing<br>Yigan<br>Decoction: | Huopu<br>Xialing<br>Decoction<br>:<br>1<br>Maxing<br>Yigan<br>Decoction | 53HaN |
|----|---------------------------------------------------------------------------------------------------------------------|--------------------------------------------------------------------------------------------------------------------|-------------------------------------------------------------------------------------------------------------------------------------|----------------------------------------------------|-------------------------------------------------------------------|------|------|-------------------|----------------------------------------------------------------------|-------------------------------------------------------------------------|-------|

苓, Chi Fu Ling)9g,  
Semen Armeniacae  
Amarum(杏仁,  
Xing Ren)9g,  
Semen Coicis(生薏  
苡仁, Sheng Yi Yi  
Ren)12g, Fructus  
Amomi  
Rotundus(Fructus  
Amomi  
Rotundus(豆蔻,  
Dou Kou), Dou  
Kou)3g, Medulla  
Tetrapanacis(通  
草, Tong Cao)3g,  
Polyporus  
Umbellatus(猪苓,  
Zhu Ling)9g,  
Semen Sojae  
Preparatum(淡豆豉,  
Dan Dou Chi)9g,  
Rhizoma  
Alismatis(泽泻, Ze  
Xie)4.5g, Cortex  
Magnoliae  
Officinalis(厚朴,

1

: 1





|                                                                                                                                                                                                                                                                                                                                      |                                                                                |                                   |                                                                               |            |            |                         |                                                                                          |                                                                                            |             |
|--------------------------------------------------------------------------------------------------------------------------------------------------------------------------------------------------------------------------------------------------------------------------------------------------------------------------------------|--------------------------------------------------------------------------------|-----------------------------------|-------------------------------------------------------------------------------|------------|------------|-------------------------|------------------------------------------------------------------------------------------|--------------------------------------------------------------------------------------------|-------------|
| <p>Atractylodis<br/>Macrocephalae(白<br/>术, Bai Zhu),<br/>Poria(茯苓, Fu<br/>Ling), Pericarpium<br/>Citri Reticulatae(陈<br/>皮, Chen Pi),<br/>Cortex Magnoliae<br/>Officinalis(厚朴,<br/>Hou Pu), Radix<br/>Glycyrrhizae(生甘<br/>草, Sheng Gan<br/>Cao); or select<br/>modified Maxing<br/>Yigan Decoction<br/>and Shengjiang<br/>Powder</p> | <p>The prevention and<br/>control of<br/>COVID-19 in<br/>Beijin(Version 2)</p> | <p>Treatment<br/>for children</p> | <p>Maxing<br/>Shigan<br/>Decoction<br/>and Maxing<br/>Yigan<br/>Decoction</p> | <p>4/4</p> | <p>3/3</p> | <p>75.00/75.0<br/>0</p> | <p>Maxing<br/>Shigan<br/>Decoction:<br/>1,<br/>Maxing<br/>Yigan<br/>Decoction:<br/>1</p> | <p>Maxing<br/>Shigan<br/>Decoction<br/>: 1,<br/>Maxing<br/>Yigan<br/>Decoction<br/>: 1</p> | <p>55BJ</p> |
|--------------------------------------------------------------------------------------------------------------------------------------------------------------------------------------------------------------------------------------------------------------------------------------------------------------------------------------|--------------------------------------------------------------------------------|-----------------------------------|-------------------------------------------------------------------------------|------------|------------|-------------------------|------------------------------------------------------------------------------------------|--------------------------------------------------------------------------------------------|-------------|





|    |                      |                                                                                                                                                                                                                                                                                                                                                                                                                                                                        |                                                                    |            |                      |   |   |        |                                    |                                     |       |
|----|----------------------|------------------------------------------------------------------------------------------------------------------------------------------------------------------------------------------------------------------------------------------------------------------------------------------------------------------------------------------------------------------------------------------------------------------------------------------------------------------------|--------------------------------------------------------------------|------------|----------------------|---|---|--------|------------------------------------|-------------------------------------|-------|
| 58 | Fanggan<br>Decoction | Amarum(杏仁,<br>Xing Ren), Gypsum<br>Fibrosum(生石<br>膏,Sheng Shi<br>Gao)(First<br>decoction),<br>Rhizoma<br>Phragmitis(芦根,<br>Lu Gen), Semen<br>Benincasae(冬瓜仁,<br>Dong Gua Ren),<br>Semen Persicae(桃<br>仁, Tao Ren),<br>Rhizoma Zingiberis<br>Recens(生姜, Sheng<br>Jiang), Semen<br>Coicis(生薏苡仁,<br>Sheng Yi Yi Ren),<br>Fructus Jujubae(大<br>枣, Da Zao), Radix<br>Glycyrrhizae(生甘<br>草,Sheng Gan Cao)<br>Radix Astragali seu<br>Hedysari(黄芪,<br>Huang Qi)20g,<br>Rhizoma | The prevention and<br>control of<br>COVID-19 in<br>Hainan province | Prevention | Yigan<br>Decoction   | 3 | 3 | 100.00 | 1                                  | 1                                   | 58HaN |
|    |                      |                                                                                                                                                                                                                                                                                                                                                                                                                                                                        |                                                                    |            | Yupingfeng<br>Powder |   |   |        |                                    |                                     |       |
|    |                      |                                                                                                                                                                                                                                                                                                                                                                                                                                                                        |                                                                    |            |                      |   |   |        | 1                                  | : 1                                 |       |
|    |                      |                                                                                                                                                                                                                                                                                                                                                                                                                                                                        |                                                                    |            |                      |   |   |        | Maxing<br>Yigan<br>Decoction:<br>1 | Maxing<br>Yigan<br>Decoction<br>: 1 |       |

|    |                                                                                    |                                                                                                                                                                                                                                                                                                                                                                                                       |                                                         |                                   |                                                    |     |     |                 |                               |                                                            |
|----|------------------------------------------------------------------------------------|-------------------------------------------------------------------------------------------------------------------------------------------------------------------------------------------------------------------------------------------------------------------------------------------------------------------------------------------------------------------------------------------------------|---------------------------------------------------------|-----------------------------------|----------------------------------------------------|-----|-----|-----------------|-------------------------------|------------------------------------------------------------|
| 59 | Pneumonia I (Xiaochaihu Decoction and Sanren Decoction or Ganlu Xiaodu micropills) | Atractylodis Macrocephalae(白术, Bai Zhu)15g, Radix Saposhnikoviae(防风, Fang Feng)10g, Radix Paeoniae Rubra(赤芍, Chi Shao)10g, Fructus Forsythiae(连翘, Lian Qiao)10g, Radix Isatidis(板蓝根, Ban Lan Gen)15g, Radix Glycyrrhizae(甘草, Gan Cao)10g Radix Bupleuri(柴胡, Chai Hu)24g, Radix Scutellariae(黄芩, Huang Qin)9g, Rhizoma Zingiberis Recens(生姜, Sheng Jiang)10g, Rhizoma Pinelliae(半夏, Ban Xia)12g, Semen | (The public version of the second edition of the trial) | Treatment/<br>Pneumonia<br>period | Xiaochaihu<br>Decoction<br>and Sanren<br>Decoction | 7/8 | 5/5 | 71.43/62.5<br>0 | Xiaochaihu<br>Decoction:<br>1 | Xiaochaihu<br>Decoction<br>: 1, Sanren<br>Decoction<br>: 1 |
|    |                                                                                    | Agreement on the prevention and treatment of COVID-19 in hubei hospital of traditional Chinese medicine (1st edition)                                                                                                                                                                                                                                                                                 |                                                         |                                   |                                                    |     |     |                 |                               |                                                            |

Armeniaca  
 Amarum(杏仁,  
 Xing Ren)15g,  
 Fructus Amomi  
 Rotundus(白  
 Fructus Amomi  
 Rotundus(豆蔻,  
 Dou Kou), Bai Dou  
 Kou)10g, Semen  
 Coicis(薏苡仁, Yi  
 Yi Ren)30g,  
 Lophatherum  
 gracile(淡竹叶, Dan  
 Zhu Ye)15g,  
 Talcum(滑石, Hua  
 Shi)15g, 土  
 Poria(茯苓, Fu  
 Ling)30g, Radix  
 Glycyrrhizae(生甘  
 草, Sheng Gan  
 Cao)10g

|    |                                                                |                                                                                        |                                                                                        |                                   |                                                   |         |         |                                   |                                                  |                                                  |                   |
|----|----------------------------------------------------------------|----------------------------------------------------------------------------------------|----------------------------------------------------------------------------------------|-----------------------------------|---------------------------------------------------|---------|---------|-----------------------------------|--------------------------------------------------|--------------------------------------------------|-------------------|
| 60 | Pneumonia<br>II(Maxing<br>Yigan<br>Decoction,Xiao<br>xianxiong | Herba Ephedrae(麻<br>黄, Ma Huang)10g,<br>Semen Armeniaca<br>Amarum(杏仁,<br>Xing Ren)10g, | Agreement on the<br>prevention and<br>treatment of<br>COVID-19 in hubei<br>hospital of | Treatment/<br>Pneumonia<br>period | Maxing<br>Yigan<br>Decoction,<br>Xiaoxianxi<br>ng | 4/3/8/9 | 4/3/3/4 | 100.00/100<br>.00/37.50/4<br>4.44 | Maxing<br>Yigan<br>Decoction:<br>1<br>Xiaoxianxi | Maxing<br>Yigan<br>Decoction<br>: 1<br>Xiaoxianx | 60pneumonia<br>II |
|----|----------------------------------------------------------------|----------------------------------------------------------------------------------------|----------------------------------------------------------------------------------------|-----------------------------------|---------------------------------------------------|---------|---------|-----------------------------------|--------------------------------------------------|--------------------------------------------------|-------------------|

Decoction, Cao guo Zhimu Decoction)

Semen Coicis(薏苡仁, Yi Yi Ren)30g,  
 Rhizoma Coptidis(黄连, Huang Lian)6g,  
 Rhizoma Pinelliae(半夏, Ban Xia)10g, Fructus Trichosanthis(瓜蒌, Gua Lou)皮 10g,  
 Fructus Tsaoako(草果, Cao Guo)10g,  
 Rhizoma Anemarrhenae(知母, Zhi Fu)10g,  
 Herba Houttuyniae(鱼腥草, Yu Xing Cao)15g, Radix Glycyrrhizae(生甘草, Sheng Gan Cao)10g, 白  
 Fructus Amomi Rotundus(Fructus Amomi Rotundus(豆蔻,

traditional Chinese medicine (1st edition)

Decoction, Cao guo Zhimu Decoction, Sanren Decoction

ong  
 Decoction: 1  
 Caoguo  
 Zhimu  
 Decoction: 1

iong  
 Decoction : 1  
 Caoguo  
 Zhimu  
 Decoction : 1/2

Sanren  
 Decoction: 0

Sanren  
 Decoction : 1





|    |                                                                         |                                                                                                                                                                                                                                                                                                                                                                                                   |                                                                                                                                            |                                               |                                                        |      |     |                 |                                                 |                                                  |      |
|----|-------------------------------------------------------------------------|---------------------------------------------------------------------------------------------------------------------------------------------------------------------------------------------------------------------------------------------------------------------------------------------------------------------------------------------------------------------------------------------------|--------------------------------------------------------------------------------------------------------------------------------------------|-----------------------------------------------|--------------------------------------------------------|------|-----|-----------------|-------------------------------------------------|--------------------------------------------------|------|
| 62 | Influenza I<br><br>(Gegen<br>Decoction or<br>Chaige Jieji<br>Decoction) | Coptidis(黄连,<br>Huang Lian)6g<br>Radix Puerariae(葛<br>根, Ge Gen)15g,<br>Herba Ephedrae(麻<br>黄, Ma Huang)10g,<br>Ramulus<br>Cinnamomi(桂枝,<br>Gui Zhi)6g, Radix<br>Paeoniae Alba(白<br>芍, Bai Shao)15g,<br>Rhizoma Zingiberis<br>Recens(生姜, Sheng<br>Jiang)10g, Radix<br>Glycyrrhizae(生甘<br>草, Sheng Gan<br>Cao)10g, Fructus<br>Jujubae(大枣, Da<br>Zao)10g, Flos<br>Lonicerae(金银花,<br>Jin Yin Hua)20g | Agreement on the<br>prevention and<br>treatment of<br>COVID-19 in hubei<br>hospital of<br>traditional Chinese<br>medicine (1st<br>edition) | Treatment/<br>Mild<br>Symptoms<br>/Flu period | Gegen<br>Decoction                                     | 7    | 7   | 100.00          | 1                                               | 1                                                |      |
| 63 | Maxing Shigan<br>Decoction and<br>Modified<br>Yinqiao<br>Powder         | Herba Ephedrae(麻<br>黄, Ma Huang),<br>Semen Armeniacae<br>Amarum(杏仁,<br>Xing Ren), Gypsum                                                                                                                                                                                                                                                                                                          | The prevention and<br>control of<br>COVID-19 in<br>Gansu province<br>(Trial)                                                               | Treatment                                     | Maxing<br>Shigan<br>Decoction<br>and Yinqiao<br>Powder | 4/10 | 3/2 | 75.00/20.0<br>0 | Maxing<br>Shigan<br>Decoction:<br>1,<br>Yinqiao | Maxing<br>Shigan<br>Decoction<br>: 1,<br>Yinqiao | 63GS |

Fibrosum(石膏, Shi Gao), Flos Lonicerae(金银花, Jin Yin Hua), Fructus Forsythiae(连翘, Lian Qiao), Radix Scutellariae(黄芩, Huang Qin), Radix Curcumae(郁金, Yu Jin), Bulbus Fritillariae Thunbergii(Bulbus Fritillariae Thunbergii(浙贝母, Zhe Bei Mu)母, Zhe Bei Mu), Radix Paeoniae Rubra(赤芍, Chi Shao), Rhizoma Arisaematis Cum Bile(胆南星, Dan Nan Xing)

Powder: 1 Powder: 0

|    |                                     |                                                     |                                                 |           |                                 |   |   |       |   |     |      |
|----|-------------------------------------|-----------------------------------------------------|-------------------------------------------------|-----------|---------------------------------|---|---|-------|---|-----|------|
| 64 | Xuanbai<br>Chengqi<br>Decoction and | Semen Armeniacae<br>Amarum(杏仁,<br>Xing Ren), Gypsum | The prevention and<br>control of<br>COVID-19 in | Treatment | Xuanbai<br>Chengqi<br>Decoction | 4 | 3 | 75.00 | 1 | 1/2 | 64GS |
|----|-------------------------------------|-----------------------------------------------------|-------------------------------------------------|-----------|---------------------------------|---|---|-------|---|-----|------|

|    |                                                                                 |                                                                                                                                                                                                                                                                                                                                                                                             |                                                                               |                                    |                                                      |        |       |                         |                                                  |                                                 |       |  |
|----|---------------------------------------------------------------------------------|---------------------------------------------------------------------------------------------------------------------------------------------------------------------------------------------------------------------------------------------------------------------------------------------------------------------------------------------------------------------------------------------|-------------------------------------------------------------------------------|------------------------------------|------------------------------------------------------|--------|-------|-------------------------|--------------------------------------------------|-------------------------------------------------|-------|--|
|    | Huanglian<br>Jiedu<br>Decoction, and<br>Modified<br>Xijiao Dihuang<br>Decoction | Fibrosum(生石膏, Sheng Shi Gao),<br>Rhizoma<br>Arisaematis Cum<br>Bile(胆南星, Dan<br>Nan Xing), Radix et<br>Rhizoma Rhei(大<br>黄, Da Huang),<br>Herba Ephedrae(麻<br>黄, Ma Huang),<br>Semen Lepidii(葶苈<br>子, Ting Li Zi),<br>Cornu Bubali(水牛<br>角, Shui Niu Jiao),<br>Semen Persicae(桃<br>仁, Tao Ren), Radix<br>Paeoniae Rubra(赤<br>芍, Chi Shao),<br>Radix<br>Glycyrrhizae(生甘<br>草, Sheng Gan Cao) | Gansu province<br>(Trial)                                                     |                                    |                                                      |        |       |                         |                                                  |                                                 |       |  |
| 65 | Maxing Yigan<br>Decoction, Modified<br>Sanren<br>Decoction                      | Herba Ephedrae(麻<br>黄, Ma Huang) 6g,<br>Semen Armeniacae<br>Amarum(杏仁,<br>Xing Ren) 9g,                                                                                                                                                                                                                                                                                                     | The prevention and<br>control of<br>COVID-19 in<br>Shanxi province<br>(Trial) | Treatment/<br>Preliminary<br>stage | Maxing<br>Shigan<br>Decoction<br>and Maxing<br>Yigan | 4/4/11 | 4/4/8 | 100.00/100<br>.00/72.72 | Maxing<br>Shigan<br>Decoction:<br>1/2,<br>Maxing | Maxing<br>Shigan<br>Decoction<br>: 1,<br>Maxing | 65SX1 |  |

Semen Coicis(薏苡仁, Yi Yi Ren) 18g,  
Fructus Amomi  
Rotundus(Fructus Amomi  
Rotundus(豆蔻, Dou Kou), Dou Kou) 9g, Herba Agastaches(藿香, Huo Xiang) 9g,  
Cortex Magnoliae Officinalis(厚朴, Hou Pu) 12g,  
Rhizoma Pinelliae(半夏, Ban Xia) 9g, Poria(茯苓, Fu Ling) 12g,  
Polyporus Umbellatus(猪苓, Zhu Ling) 9g, Radix Scutellariae(黄芩, Huang Qin)9g,  
Fructus Forsythiae(连翘, Lian Qiao) 12g,  
Radix

Decoction  
and Huopu  
Xialing  
Decoction

Yigan  
Decoction:  
1,  
Yigan  
Decoction  
: 1, Huopu  
Xialing  
Decoction  
: 1

Huopu  
Xialing  
Decoction:  
1



|    |                                                                |                                                                                                                                                                                                                                                                                                                                                                                                                                                                                |                                |                   |    |   |       |   |     |      |  |
|----|----------------------------------------------------------------|--------------------------------------------------------------------------------------------------------------------------------------------------------------------------------------------------------------------------------------------------------------------------------------------------------------------------------------------------------------------------------------------------------------------------------------------------------------------------------|--------------------------------|-------------------|----|---|-------|---|-----|------|--|
|    |                                                                | Fibrosum(生石膏,<br>Sheng Shi<br>Gao)(First<br>decoction), Semen<br>Armeniacae<br>Amarum(杏仁,<br>Xing Ren), Radix<br>Bupleuri(柴胡, Chai<br>Hu), Periostracum<br>Cicadae(蝉蜕, Chan<br>Tui), Radix<br>Glycyrrhizae(生甘<br>草, Sheng Gan Cao)<br>Flos Lonicerae(金<br>银花, Jin Yin Hua),<br>Fructus<br>Forsythiae(连翘,<br>Lian Qiao), Herba<br>Menthae<br>Heplocalycis(薄荷,<br>Bo He), Radix<br>Platycodonis(桔梗,<br>Jie Geng), Herba<br>Schizonepetae(荆<br>芥, Jing Jie),<br>Fructus Arctii(牛蒡 |                                |                   |    |   |       |   |     |      |  |
| 67 | Yinqiao<br>Powder and<br>Modified<br>Qingwenbaidu<br>Decoction | The prevention and<br>control of<br>COVID-19 in<br>Tianjin                                                                                                                                                                                                                                                                                                                                                                                                                     | Treatment/<br>Mild<br>Symptoms | Yinqiao<br>Powder | 10 | 8 | 80.00 | 1 | 3/4 | 67TJ |  |



Jin Yin Hua)15g,  
Rhizoma  
Anemarrhenae(知  
母, Zhi Fu)10g,  
Cornu Bubali(水牛  
角, Shui Niu  
Jiao)30g, Bulbus  
Fritillariae  
Thunbergii(Bulbus  
Fritillariae  
Thunbergii(浙贝母,  
Zhe Bei Mu)母, Zhe  
Bei Mu)10g,  
Fructus  
Trichosanthis(瓜蒌,  
Gua Lou)30g,  
Radix et Rhizoma  
Rhei(生大黄, Sheng  
Da  
Huang)10g(After  
decoction), Cortex  
Magnoliae  
Officinalis(厚朴,  
Hou Pu)15g,  
Lumbricus(地龙, Di  
Long)20g, Semen



|    |                                                                |                                                                                                                                                                                                                                                                                                                                                                             |                                                                             |                             |                                                       |     |     |               |                                                          |                                                            |       |
|----|----------------------------------------------------------------|-----------------------------------------------------------------------------------------------------------------------------------------------------------------------------------------------------------------------------------------------------------------------------------------------------------------------------------------------------------------------------|-----------------------------------------------------------------------------|-----------------------------|-------------------------------------------------------|-----|-----|---------------|----------------------------------------------------------|------------------------------------------------------------|-------|
| 69 | Maxing Ganshi decoction and Modified Xuanbai Chengqi Decoction | Lepidii(葶苈子, Ting Li Zi)20g, cRadix Paeoniae Rubra(赤芍, Chi Shao)20g, Radix Astragali seu Hedysari(生黄芪, ShengHuang Qi)20g Gypsum Fibrosum(生石膏, Sheng Shi Gao)(First decoction), Semen Armeniacae Amarum(杏仁, Xing Ren), Radix et Rhizoma Rhei(生大黄, Sheng Da Huang)(After decoction), Fructus Trichosanthis(瓜蒌, Gua Lou), Herba Ephedrae(麻黄, Ma Huang), Rhizoma Anemarrhenae(知 | The prevention and control of COVID-19 in Shanxi province (Trial version 1) | Treatment/ Critical illness | Maxing Shigan Decoction and Xuanbai Chengqi Decoction | 4/4 | 4/4 | 100.00/100.00 | Maxing Shigan Decoction: 1, Xuanbai Chengqi Decoction: 1 | Maxing Shigan Decoction : 1, Xuanbai Chengqi Decoction : 1 | 69SX2 |
|----|----------------------------------------------------------------|-----------------------------------------------------------------------------------------------------------------------------------------------------------------------------------------------------------------------------------------------------------------------------------------------------------------------------------------------------------------------------|-----------------------------------------------------------------------------|-----------------------------|-------------------------------------------------------|-----|-----|---------------|----------------------------------------------------------|------------------------------------------------------------|-------|

|    |                                            |                                                                                                                                                                                                                                                                                                                                                                                                                                                                                    |                                                                               |           |                                                        |      |     |                  |                                                                  |                                                               |      |
|----|--------------------------------------------|------------------------------------------------------------------------------------------------------------------------------------------------------------------------------------------------------------------------------------------------------------------------------------------------------------------------------------------------------------------------------------------------------------------------------------------------------------------------------------|-------------------------------------------------------------------------------|-----------|--------------------------------------------------------|------|-----|------------------|------------------------------------------------------------------|---------------------------------------------------------------|------|
| 70 | Maxing Shigan<br>Decoction, Yinqiao Powder | 母, Zhi Fu), Radix<br>Scutellariae(黄芩,<br>Huang Qin),<br>Rhizoma<br>Phragmitis(芦根,<br>Lu Gen), Radix<br>Glycyrrhizae(生甘<br>草, Sheng Gan Cao)<br>Herba Ephedrae(麻<br>黄, Ma Huang),<br>Semen Armeniacae<br>Amarum(杏仁,<br>Xing Ren), Gypsum<br>Fibrosum(石膏, Shi<br>Gao), Cortex<br>Mori(桑白皮, Sang<br>Bai Pi), Flos<br>Lonicerae(金银花,<br>Jin Yin Hua),<br>Fructus<br>Forsythiae(连翘,<br>Lian Qiao), Radix<br>Scutellariae(黄芩,<br>Huang Qin), Bulbus<br>Fritillariae<br>Thunbergii(Bulbus | The prevention and<br>control of<br>COVID-19 in<br>Yunnan province<br>(Trial) | Treatment | Maxing<br>Shigan<br>Decoction<br>and Yinqiao<br>Powder | 4/10 | 4/3 | 100.00/30.<br>00 | Maxing<br>Shigan<br>Decoction:<br>1,<br><br>Yinqiao<br>Powder: 1 | Maxing<br>Shigan<br>Decoction<br>: 1,<br>Yinqiao<br>Powder: 0 | 70YN |
|----|--------------------------------------------|------------------------------------------------------------------------------------------------------------------------------------------------------------------------------------------------------------------------------------------------------------------------------------------------------------------------------------------------------------------------------------------------------------------------------------------------------------------------------------|-------------------------------------------------------------------------------|-----------|--------------------------------------------------------|------|-----|------------------|------------------------------------------------------------------|---------------------------------------------------------------|------|

|    |                                           |                                                                                                                                                                                                                                                                                                                                                                                                                                                                                                                           |                                                                               |                                    |                               |    |   |       |   |     |       |
|----|-------------------------------------------|---------------------------------------------------------------------------------------------------------------------------------------------------------------------------------------------------------------------------------------------------------------------------------------------------------------------------------------------------------------------------------------------------------------------------------------------------------------------------------------------------------------------------|-------------------------------------------------------------------------------|------------------------------------|-------------------------------|----|---|-------|---|-----|-------|
| 71 | Modified<br>Huoxiang<br>Zhengqi<br>Powder | <p>Fritillariae<br/>Thunbergii(浙贝母,<br/>Zhe Bei Mu)母, Zhe<br/>Bei Mu), Radix<br/>Glycyrrhizae(生甘<br/>草, Sheng Gan Cao)<br/>Rhizoma<br/>Atractylodis(苍术,<br/>Cang Shu) 15g,<br/>Pericarpium Citri<br/>Reticulatae(陈皮,<br/>Chen Pi) 9g,<br/>Rhizoma<br/>Pinelliae(半夏, Ban<br/>Xia) 9g, Cortex<br/>Magnoliae<br/>Officinalis(厚朴,<br/>Hou Pu) 9g, Herba<br/>Ephedrae(麻黄, Ma<br/>Huang) 6g, Herba<br/>Agastaches(藿香,<br/>Huo Xiang) 9g,<br/>Fructus Tsaoko(草<br/>果, Cao Guo) 6g,<br/>Rhizoma et Radix<br/>Notopterygii(羌活,</p> | The prevention and<br>control of<br>COVID-19 in<br>Shanxi province<br>(Trial) | Treatment/<br>Preliminary<br>stage | Huoxiang<br>Zhengqi<br>Powder | 13 | 6 | 46.10 | 1 | 2/4 | 71SX1 |
|----|-------------------------------------------|---------------------------------------------------------------------------------------------------------------------------------------------------------------------------------------------------------------------------------------------------------------------------------------------------------------------------------------------------------------------------------------------------------------------------------------------------------------------------------------------------------------------------|-------------------------------------------------------------------------------|------------------------------------|-------------------------------|----|---|-------|---|-----|-------|



|    |                                               |                                                                                                                                                                                                                                       |                                                                                        |                                   |                                                        |         |       |                        |                                                              |                                                               |  |  |  |       |
|----|-----------------------------------------------|---------------------------------------------------------------------------------------------------------------------------------------------------------------------------------------------------------------------------------------|----------------------------------------------------------------------------------------|-----------------------------------|--------------------------------------------------------|---------|-------|------------------------|--------------------------------------------------------------|---------------------------------------------------------------|--|--|--|-------|
|    |                                               | Huang Qin),<br>Fructus Arctii(牛蒡<br>子, Niu Bang Zi),<br>Radix<br>Glycyrrhizae(生甘<br>草, Sheng Gan Cao)<br>Herba Ephedrae(麻<br>黄, Ma Huang),<br>Semen Armeniacae<br>Amarum(杏仁,<br>Xing Ren), Gypsum<br>Fibrosum(石膏, Shi<br>Gao), Cortex |                                                                                        |                                   |                                                        |         |       |                        |                                                              |                                                               |  |  |  |       |
| 73 | Maxing Shigan<br>Decoction,Sang<br>Bei Powder | Mori(桑白皮, Sang<br>Bai Pi), Bulbus<br>Fritillariae<br>Thunbergii(Bulbus<br>Fritillariae<br>Thunbergii(浙贝母,<br>Zhe Bei Mu)母, Zhe<br>Bei Mu), Radix<br>Glycyrrhizae(生甘<br>草, Sheng Gan Cao)                                              | The prevention and<br>control of<br>COVID-19 in<br>Hunan province<br>(Trial version 3) | Treatment/<br>Critical<br>illness | Maxing<br>Shigan<br>Decoction<br>and SangBei<br>Powder | 4/2     | 4/2   | 100.00/100<br>.00      | Maxing<br>Shigan<br>Decoction:<br>1,<br>SangBei<br>Powder: 1 | Maxing<br>Shigan<br>Decoction<br>: 1,<br>SangBei<br>Powder: 1 |  |  |  | 73HuN |
| 74 | Modified<br>Maxing Shigan<br>Decoction        | Herba Ephedrae(麻<br>黄, Ma Huang),<br>Semen Armeniacae                                                                                                                                                                                 | The prevention and<br>control of<br>COVID-19 in                                        | Treatment                         | Maxing<br>Shigan<br>Decoction,                         | 4/10/11 | 4/3/4 | 100.00/30.<br>00/36.36 | Maxing<br>Shigan<br>Decoction:                               | Maxing<br>Shigan<br>Decoction                                 |  |  |  | 74JX  |

Amarum(杏仁, Jiangxi province  
Xing Ren), Gypsum (Trial)  
Fibrosus(石膏, Shi  
Gao), Radix  
Glycyrrhizae(生甘  
草, Sheng Gan  
Cao), Flos  
Lonicerae(金银花,  
Jin Yin Hua),  
Fructus  
Forsythiae(连翘,  
Lian Qiao), Folium  
Isatidis(大青叶, Da  
Qing Ye), Radix  
Scutellariae(黄芩,  
Huang Qin), Bulbus  
Fritillariae  
Thunbergii(Bulbus  
Fritillariae  
Thunbergii(浙贝母,  
Zhe Bei Mu)母, Zhe  
Bei Mu), Rhizoma  
Atractylodis(苍术,  
Cang Shu),  
Talcum(滑石, Hua  
Shi), Herba

Yinqiao  
Powder and  
Ganlu  
Xiaodu  
micropills

1, : 1,  
Yinqiao  
Powder:  
0,  
Ganlu  
Xiaodu  
micropills  
: 1/3

Yinqiao  
Powder: 1,  
Ganlu  
Xiaodu  
micropills:  
2/3

|    |                                                                    |                                                                                                                                                                                                                                                                                                                                                                                                                     |                                                                            |                                      |                                                          |     |     |               |                                     |                                     |
|----|--------------------------------------------------------------------|---------------------------------------------------------------------------------------------------------------------------------------------------------------------------------------------------------------------------------------------------------------------------------------------------------------------------------------------------------------------------------------------------------------------|----------------------------------------------------------------------------|--------------------------------------|----------------------------------------------------------|-----|-----|---------------|-------------------------------------|-------------------------------------|
| 75 | Sangbei Zhisou Powder (empirical formula of professor Xiong Jibo ) | <p>Agastaches(藿香, Huo Xiang)</p> <p>Cortex Mori(桑白皮, Sang Bai Pi), Bulbus Fritillariae Thunbergii(Bulbus Fritillariae Thunbergii(浙贝母, Zhe Bei Mu)母, Zhe Bei Mu), Radix Stemonae(百部, Bai Bu), Radix Asteris(紫菀, Zi Wan), Rhizoma Cynanchi Stauntonii(白前, Bai Qian), Radix Platycodonis(桔梗, Jie Geng), Herba Schizonepetae(荆芥, Jing Jie), Pericarpium Citri Reticulatae(陈皮, Chen Pi), Semen Armeniacae Amarum(杏仁,</p> | The prevention and control of COVID-19 in Hunan province (Trial version 3) | Treatment/ Fever in the early period | Sangbei Zhisou Powder (SangBei Powder and Zhisou Powder) | 2/7 | 2/7 | 100.00/100.00 | SangBei Powder: 1, Zhisou Powder: 1 | SangBei Powder: 1, Zhisou Powder: 1 |
|----|--------------------------------------------------------------------|---------------------------------------------------------------------------------------------------------------------------------------------------------------------------------------------------------------------------------------------------------------------------------------------------------------------------------------------------------------------------------------------------------------------|----------------------------------------------------------------------------|--------------------------------------|----------------------------------------------------------|-----|-----|---------------|-------------------------------------|-------------------------------------|

|    |                                                          |                                                                                                                                                                                                                                                                                                                                                                                           |                                                                                        |                                   |                                                          |     |     |                   |                                                             |                                                                 |       |
|----|----------------------------------------------------------|-------------------------------------------------------------------------------------------------------------------------------------------------------------------------------------------------------------------------------------------------------------------------------------------------------------------------------------------------------------------------------------------|----------------------------------------------------------------------------------------|-----------------------------------|----------------------------------------------------------|-----|-----|-------------------|-------------------------------------------------------------|-----------------------------------------------------------------|-------|
| 76 | Xuanbai<br>Chengqi<br>Decoction and<br>SangBei<br>Powder | Xing Ren), Radix<br>Glycyrrhizae(甘草,<br>Gan Cao)<br>Semen Armeniacae<br>Amarum(杏仁,<br>Xing Ren), Gypsum<br>Fibrosum(生石膏,<br>Sheng Shi Gao),<br>Fructus<br>Trichosanthis(瓜蒌,<br>Gua Lou), Radix et<br>Rhizoma Rhei(大<br>黄, Da Huang),<br>Cortex Mori(桑白<br>皮, Sang Bai Pi),<br>Bulbus Fritillariae<br>Thunbergii(Bulbus<br>Fritillariae<br>Thunbergii(浙贝母,<br>Zhe Bei Mu)母, Zhe<br>Bei Mu) | The prevention and<br>control of<br>COVID-19 in<br>Hunan province<br>(Trial version 3) | Treatment/<br>Critical<br>illness | Xuanbai<br>Chengqi<br>Decoction<br>and SangBei<br>Powder | 4/2 | 4/2 | 100.00/100<br>.00 | Xuanbai<br>Chengqi<br>Decoction:<br>1, SangBei<br>Powder: 1 | Xuanbai<br>Chengqi<br>Decoction<br>: 1,<br>SangBei<br>Powder: 1 | 76HuN |
| 77 | Modified<br>Xuanbai<br>Chengqi<br>Decoction              | Semen Armeniacae<br>Amarum(杏仁,<br>Xing Ren), Gypsum<br>Fibrosum(生石膏,<br>Sheng Shi Gao),                                                                                                                                                                                                                                                                                                   | The prevention and<br>control of<br>COVID-19 in<br>Jiangxi province<br>(Trial)         | Treatment/<br>Critical<br>illness | Xuanbai<br>Chengqi<br>Decoction                          | 4   | 4   | 100.00            | 1                                                           | 1                                                               | 77JX  |





|    |                        |                                                                                                                                                                                                                                                                                                                                                                                                                                      |           |         |         |            |   |     |
|----|------------------------|--------------------------------------------------------------------------------------------------------------------------------------------------------------------------------------------------------------------------------------------------------------------------------------------------------------------------------------------------------------------------------------------------------------------------------------|-----------|---------|---------|------------|---|-----|
| 79 | COVID-19 III<br>(Baihu | Armeniacaec                                                                                                                                                                                                                                                                                                                                                                                                                          | Decoction | Chengqi | Chengqi | Decoction: | 1 | : 1 |
|    |                        | Amarum(杏仁,<br>Xing Ren) 9g,<br>Gypsum<br>Fibrosu(m生石膏,<br>Sheng Shi Gao)<br>30g, Semen<br>Lepidii(葶苈子,<br>Ting Li Zi) 9g,<br>Fructus<br>Trichosanthis(瓜蒌,<br>Gua Lou) 30g,<br>Fructus Tsaoko(草<br>果, Cao Guo) 6g,<br>Semen Arecae(槟<br>榔, Bin Lang) 12g,<br>Rhizoma<br>Atractylodis(苍术,<br>Cang Shu) 9g,<br>Semen Persicae(桃<br>仁, Tao Ren) 9g,<br>Radix et Rhizoma<br>Rhei(生大黄, Sheng<br>Da Huang) 6g<br>Gypsum<br>Fibrosu(m石膏, Shi |           |         |         |            |   |     |



|    |                                                         |                                                                                                                                                                                                                                                                                                                                                                                                                                                                                  |                                                                                                                       |                        |                                                   |       |     |             |                                                      |                                                         |      |
|----|---------------------------------------------------------|----------------------------------------------------------------------------------------------------------------------------------------------------------------------------------------------------------------------------------------------------------------------------------------------------------------------------------------------------------------------------------------------------------------------------------------------------------------------------------|-----------------------------------------------------------------------------------------------------------------------|------------------------|---------------------------------------------------|-------|-----|-------------|------------------------------------------------------|---------------------------------------------------------|------|
| 80 | Jingfang Baidu Powder, Modified Huopu Xialing Decoction | 鳖, Tu Bie)10g,<br>Retinervus Citri<br>Furctus(橘络, Ju Luo)15g, Semen<br>Raphani(莱菔子,<br>Lai Fu Zi)20g,<br>Semen Lepidii(葶苈<br>子, Ting Li Zi)15g,<br>Retinervus Luffae<br>Fructus(丝瓜络, Si<br>Gua Luo)30g<br>Herba<br>Schizonepetae(荆<br>芥, Jing Jie)15g,<br>Radix<br>Saposhnikoviae(防<br>风, Fang Feng)15g,<br>Rhizoma Ligustici<br>Chuanxiong(川芎,<br>Chuan Qiong)15g,<br>Radix Angelicae<br>Dahuricae(白芷,<br>Bai Zhi)15g, Herba<br>Menthae<br>Heplocalycis(薄荷,<br>Bo He)15g, Radix | Sichuan provincial administration of TCM/The prevention and control of COVID-19 in Sichuan province (Trial version 1) | Treatment/ Acute stage | Jingfang Baidu Powder and Huopu Xialing Decoction | 11/11 | 5/7 | 45.45/63.64 | Jingfang Baidu Powder: 1, Huopu Xialing Decoction: 1 | Jingfang Baidu Powder: 1/4, Huopu Xialing Decoction : 1 | 80SC |
|----|---------------------------------------------------------|----------------------------------------------------------------------------------------------------------------------------------------------------------------------------------------------------------------------------------------------------------------------------------------------------------------------------------------------------------------------------------------------------------------------------------------------------------------------------------|-----------------------------------------------------------------------------------------------------------------------|------------------------|---------------------------------------------------|-------|-----|-------------|------------------------------------------------------|---------------------------------------------------------|------|

Platycodonis(桔梗,

Jie Geng)30g,

Herba

Agastaches(藿香,

Huo Xiang)15g,

Folium Perillae(紫

苏叶, Zi Su Ye)15g,

Cortex Magnoliae

Officinalis(厚朴,

Hou Pu)15g,

Rhizoma

Atractylodis

Macrocephalae(白

术, Bai Zhu)30g,

Rhizoma

Pinelliae(半夏, Ban

Xia)15g, (建曲, Jian

Qu)15g, Semen

Coicis(薏苡仁, Yi

Yi Ren)30g,

Poria(茯苓, Fu

Ling)30g, Fructus

Amomi

Rotundus(Fructus

Amomi

Rotundus(豆蔻,

|    |                                        |                                                                                                                                                                                                                                                                                                                                                                                                                                           |                                                                               |                                    |                                                                      |     |     |                 |                                                                              |                                                                                 |       |
|----|----------------------------------------|-------------------------------------------------------------------------------------------------------------------------------------------------------------------------------------------------------------------------------------------------------------------------------------------------------------------------------------------------------------------------------------------------------------------------------------------|-------------------------------------------------------------------------------|------------------------------------|----------------------------------------------------------------------|-----|-----|-----------------|------------------------------------------------------------------------------|---------------------------------------------------------------------------------|-------|
| 81 | Modified<br>Maxing Shigan<br>Decoction | Dou Kou), Dou<br>Kou)15g, Semen<br>Armeniacae<br>Amarum(杏仁,<br>Xing Ren)15g,<br>Crataegus<br>pinnatifida(焦山楂,<br>Jiao Shan Zha)30g,<br>Semen Dolichoris<br>Album(白扁豆, Bai<br>Bian Dou)30g,<br>Rhizoma<br>Phragmitis(芦根,<br>Lu Gen)30g<br>Herba Ephedrae(麻<br>黄, Ma Huang)<br>9-12g, Semen<br>Armeniacae<br>Amarum(杏仁,<br>Xing Ren) 9g,<br>Gypsum<br>Fibrosum(生石膏,<br>Sheng Shi Gao)<br>30g, Fructus<br>Trichosanthis(瓜蒌,<br>Gua Lou) 30g, | The prevention and<br>control of<br>COVID-19 in<br>Shanxi province<br>(Trial) | Treatment/<br>Progressive<br>stage | Maxing<br>Shigan<br>Decoction<br>and Xuanbai<br>Chengqi<br>Decoction | 4/4 | 3/3 | 75.00/75.0<br>0 | Maxing<br>Shigan<br>Decoction:<br>1, Xuanbai<br>Chengqi<br>Decoction:<br>1/2 | Maxing<br>Shigan<br>Decoction<br>: 1,<br>Xuanbai<br>Chengqi<br>Decoction<br>: 1 | 81SX1 |
|----|----------------------------------------|-------------------------------------------------------------------------------------------------------------------------------------------------------------------------------------------------------------------------------------------------------------------------------------------------------------------------------------------------------------------------------------------------------------------------------------------|-------------------------------------------------------------------------------|------------------------------------|----------------------------------------------------------------------|-----|-----|-----------------|------------------------------------------------------------------------------|---------------------------------------------------------------------------------|-------|

|    |                                                                                                                                                                                                                                                                                                                                                              |                                                                                                             |                                                                              |           |                                                         |     |     |                 |                                                               |                                                               |      |
|----|--------------------------------------------------------------------------------------------------------------------------------------------------------------------------------------------------------------------------------------------------------------------------------------------------------------------------------------------------------------|-------------------------------------------------------------------------------------------------------------|------------------------------------------------------------------------------|-----------|---------------------------------------------------------|-----|-----|-----------------|---------------------------------------------------------------|---------------------------------------------------------------|------|
|    | Radix<br>Scutellariae(黄芩,<br>Huang Qin) 12g,<br>Cortex Mori(桑白<br>皮, Sang Bai Pi)<br>30g, Bulbus<br>Fritillariae<br>Thunbergii(Bulbus<br>Fritillariae<br>Thunbergii(浙贝母,<br>Zhe Bei Mu)母, Zhe<br>Bei Mu) 9g, Folium<br>Eriobotryae(枇杷<br>叶, Pi Pa Ye) 9g,<br>Adenophora stricta<br>Miq.(沙参, Sha<br>Shen) 12g,<br>Periostracum<br>Cicadae(蝉蜕, Chan<br>Tui) 6g |                                                                                                             |                                                                              |           |                                                         |     |     |                 |                                                               |                                                               |      |
| 82 | Maxing Yigan<br>Decoction<br>and Shengjiang<br>Powder or<br>Dayuan<br>Decoction; or                                                                                                                                                                                                                                                                          | Herba Ephedrae(麻<br>黄, Ma Huang),<br>Semen Armeniacae<br>Amarum(杏仁,<br>Xing Ren), Fructus<br>Tsaoko(草果, Cao | The prevention and<br>control of<br>COVID-19 in<br>Gansu province<br>(Trial) | Treatment | Maxing<br>Yigan<br>Decoction<br>and Dayuan<br>Decoction | 4/7 | 2/3 | 50.00/42.8<br>6 | Maxing<br>Yigan<br>Decoction:<br>1, Dayuan<br>Decoction:<br>1 | Maxing<br>Yigan<br>Decoction<br>: 1/2,<br>Dayuan<br>Decoction | 82GS |

Modified  
 Qianghuo  
 Shengshi  
 Decoction

Guo), Cortex  
 Magnoliae  
 Officinalis(厚朴,  
 Hou Pu), Semen  
 Arecae(槟榔, Bin  
 Lang), Periostracum  
 Cicadae(蝉蜕, Chan  
 Tui), Fructus  
 Forsythiae(连翘,  
 Lian Qiao),  
 Rhizoma et Radix  
 Notopterygii(羌活,  
 Qiang Huo),  
 Rhizoma  
 Atractylodis(苍术,  
 Cang Shu), Radix  
 Platycodonis(桔梗,  
 Jie Geng), Radix et  
 Rhizoma Rhei(大  
 黄, Da Huang)

83  
 Wangshi  
 Lianpu  
 Drink,Huopu  
 Xialing  
 Decoction

Rhizoma  
 Coptidis(黄连,  
 Huang Lian),  
 Cortex Magnoliae  
 Officinalis(厚朴,  
 Hou Pu), 法

The prevention and  
 control of  
 COVID-19 in  
 Hunan province  
 (Trial version 3)

Treatment/  
 Fever in the  
 early period  
 Huopu  
 Xialing  
 Decoction

11

10

90.10

1

1

83HuN



Rhizoma

Pinelliae(半夏, Ban

Xia), Herba

Agastaches(藿香,

Huo Xiang),

Poria(茯苓, Fu

Ling), Polyporus

Umbellatus(猪苓,

Zhu Ling),

Talcum(滑石, Hua

Shi), Fructus

Amomi

Rotundus(Fructus

Amomi

Rotundus(豆蔻,

Dou Kou), Dou

Kou), Semen

Armeniaca

Amarum(杏仁,

Xing Ren), Semen

Coicis(薏苡仁, Yi

Yi Ren), Medulla

Tetrapanacis(通草,

Tong Cao),

Rhizoma

Alismatis(泽泻, Ze

|    |                                                               |                                                                                                                                                                                                                                                                                                                                                                                                                                                  |                                                                                               |           |                                                      |     |     |                  |                                                         |                                                              |
|----|---------------------------------------------------------------|--------------------------------------------------------------------------------------------------------------------------------------------------------------------------------------------------------------------------------------------------------------------------------------------------------------------------------------------------------------------------------------------------------------------------------------------------|-----------------------------------------------------------------------------------------------|-----------|------------------------------------------------------|-----|-----|------------------|---------------------------------------------------------|--------------------------------------------------------------|
| 84 | Baihu<br>Decoction and<br>Modified<br>Qingwen Baidu<br>Powder | Xie)<br>Gypsum<br>Fibrosus(石膏, Shi<br>Gao)30g(First<br>decoction), Cornu<br>Bubali(水牛角,<br>Shui Niu Jiao)30g,<br>Talcum(滑石, Hua<br>Shi)10g, Radix<br>Lithospermi(紫草,<br>Zi Cao)15g, Radix<br>Glycyrrhizae(生甘<br>草, Sheng Gan<br>Cao)6g, Flos<br>Lonicerae(金银花,<br>Jin Yin Hua)15g,<br>Fructus<br>Forsythiae(连翘,<br>Lian Qiao)15g,<br>Radix<br>Scutellariae(黄芩,<br>Huang Qin)15g,<br>Radix Paeoniae<br>Rubra(赤芍, Chi<br>Shao)12g,<br>Periostracum | Recommendation<br>plan for TCM<br>treatment of<br>COVID-19 in<br>zhejiang province<br>(Trial) | Treatment | Qingying<br>Decoction<br>and<br>Shengjiang<br>Powder | 9/4 | 3/4 | 30.00/100.<br>00 | Qingying<br>Decoction:<br>1,<br>Shengjiang<br>Powder: 1 | Qingying<br>Decoction<br>: 0,<br>Shengjian<br>g Powder:<br>1 |
|----|---------------------------------------------------------------|--------------------------------------------------------------------------------------------------------------------------------------------------------------------------------------------------------------------------------------------------------------------------------------------------------------------------------------------------------------------------------------------------------------------------------------------------|-----------------------------------------------------------------------------------------------|-----------|------------------------------------------------------|-----|-----|------------------|---------------------------------------------------------|--------------------------------------------------------------|





|    |                                      |                                                                                                                                                                                 |                                                                                           |           |         |         |                           |                                                                                                   |                                                                                                    |                                                                                  |                                                                                                 |        |
|----|--------------------------------------|---------------------------------------------------------------------------------------------------------------------------------------------------------------------------------|-------------------------------------------------------------------------------------------|-----------|---------|---------|---------------------------|---------------------------------------------------------------------------------------------------|----------------------------------------------------------------------------------------------------|----------------------------------------------------------------------------------|-------------------------------------------------------------------------------------------------|--------|
| 87 | Qingfei Pai du mixture (Pneumonia I) | Radix Platycodonis(桔梗, Jie Geng)20-30g,                                                                                                                                         | Southwest medical medicine hospital/Diagnosis and treatment of COVID-19 (Trial version 6) | Treatment | 4/5/7/9 | 4/5/6/6 | 100.00/100.00/85.71/66.67 | Radix Scutellariae(黄芩, Huang Qin)15g,                                                             | Maxing Shigan Decoction: 1, Wuling Powder: 1, Xiaochaihu Decoction: 1, Sheganma huang Decoction: 1 | Fructus Arctii(牛蒡子, Niu Bang Zi)15g, Radix Glycyrrhizae(生甘草, Sheng Gan Cao)5-10g | Maxing Shigan Decoction and Wuling Powder and Xiaochaihu Decoction and Shegan Mahuang Decoction | 87qfpd |
|    |                                      | Herba Ephedrae(麻黄, Ma Huang)9g, Radix Glycyrrhizae(甘草, Gan Cao)6g, Semen Armeniacae Amarum(杏仁, Xing Ren)9g, Gypsum Fibrosum(生石膏, Sheng Shi Gao)15-30g(First decoction), Ramulus |                                                                                           |           |         |         |                           | Maxing Shigan Decoction : 1, Wuling Powder: 1, Xiaochaihu Decoction : 1, Sheganma huang Decoction |                                                                                                    |                                                                                  |                                                                                                 |        |

Cinnamomi(桂枝,  
Gui Zhi)9g,  
Rhizoma  
Alismatis(泽泻, Ze  
Xie)9g, Polyporus  
Umbellatus(猪苓,  
Zhu Ling)9g,  
Rhizoma  
Atractylodis  
Macrocephalae(白  
术, Bai Zhu)9g,  
Poria(茯苓, Fu  
Ling)15g, Radix  
Bupleuri(柴胡, Chai  
Hu)16g, Radix  
Scutellariae(黄芩,  
Huang Qin)6g, 姜  
Rhizoma  
Pinelliae(半夏, Ban  
Xia)9g, Rhizoma  
Zingiberis  
Recens(生姜, Sheng  
Jiang)9g, Radix  
Asteris(紫菀, Zi  
Wan)9g, Flos  
Farfarae(冬花,

: 1

|    |                                                                    |                                                                                                                                                                                                                                                                                                                                                                                                                                                                          |                                                                                                                                            |                           |                                                                    |      |     |                 |                                                                                |                                                                                    |      |
|----|--------------------------------------------------------------------|--------------------------------------------------------------------------------------------------------------------------------------------------------------------------------------------------------------------------------------------------------------------------------------------------------------------------------------------------------------------------------------------------------------------------------------------------------------------------|--------------------------------------------------------------------------------------------------------------------------------------------|---------------------------|--------------------------------------------------------------------|------|-----|-----------------|--------------------------------------------------------------------------------|------------------------------------------------------------------------------------|------|
| 88 | Qingqi Huatan<br>Decoction, Modified<br>Huopu Xialing<br>Decoction | Dong Hua)9g,<br>Rhizoma<br>Belamcandae(射干,<br>She Gan)9g,<br>Asarum sieboldii<br>Miq.(细辛, Xi<br>Xin)6g, Rhizoma<br>Dioscoreae(山药,<br>Shan Yao)12g,<br>Fructus Aurantii<br>Immaturus(枳实,<br>Zhi Shi)6g,<br>Pericarpium Citri<br>Reticulatae(陈皮,<br>Chen Pi)6g, Herba<br>Agastaches(藿香,<br>Huo Xiang)9g<br>Pericarpium Citri<br>Reticulatae(陈皮,<br>Chen Pi)10-15g,<br>Semen Armeniacae<br>Amarum(杏仁,<br>Xing Ren)10-15g,<br>Radix<br>Scutellariae(黄芩,<br>Huang Qin)10-15g, | Sichuan provincial<br>administration of<br>TCM/The<br>prevention and<br>control of<br>COVID-19 in<br>Sichuan province<br>(Trial version 1) | Treatment/<br>Acute stage | Qingqi<br>Huatan<br>Decoction<br>and Huopu<br>Xialing<br>Decoction | 8/11 | 5/4 | 62.50/36.3<br>6 | Qingqi<br>Huatan<br>Decoction<br>: 0,<br>Huopu<br>Xialing<br>Decoction:<br>3/4 | Qingqi<br>Huatan<br>Decoction<br>: 2/3 ,<br>Huopu<br>Xialing<br>Decoction<br>: 1/3 | 88SC |
|----|--------------------------------------------------------------------|--------------------------------------------------------------------------------------------------------------------------------------------------------------------------------------------------------------------------------------------------------------------------------------------------------------------------------------------------------------------------------------------------------------------------------------------------------------------------|--------------------------------------------------------------------------------------------------------------------------------------------|---------------------------|--------------------------------------------------------------------|------|-----|-----------------|--------------------------------------------------------------------------------|------------------------------------------------------------------------------------|------|

Fructus  
 Trichosanthis(瓜蒌,  
 Gua Lou)皮 10-15g,  
 Poria(茯苓, Fu  
 Ling)15-30g, Herba  
 Agastaches(藿香,  
 Huo Xiang)15g,  
 Cortex Magnoliae  
 Officinalis(厚朴,  
 Hou Pu)10-20g,  
 Herba Artemisiae  
 Annuae(青蒿, Qing  
 Hao)20-30g,  
 Rhizoma  
 Phragmitis(芦根,  
 Lu Gen)20-30g,  
 Flos Lonicerae(金  
 银花, Jin Yin  
 Hua)15-30g, Radix  
 Pseudostellariae(太  
 子参, Tai Zi  
 Shen)30g, Radix  
 Glycyrrhizae(生甘  
 草, Sheng Gan  
 Cao)5-10g

89 Sanren

Semen Armeniacae

The prevention and

Treatment/

Sanren

8/4

8/3

100.00/75.

Sanren

Sanren



Decoction  
and Modified  
Shengjiang  
Powder

Amarum(杏仁,  
Xing Ren), Semen  
Coicis(薏苡仁, Yi  
Yi Ren), Fructus  
Amomi  
Rotundus(Fructus  
Amomi  
Rotundus(豆蔻,  
Dou Kou), Dou  
Kou), Talcum(滑石,  
Hua Shi), Medulla  
Tetrapanacis(通草,  
Tong Cao),  
Lophatherum  
gracile(淡竹叶, Dan  
Zhu Ye), Rhizoma  
Pinelliae(半夏, Ban  
Xia), Cortex  
Magnoliae  
Officinalis(厚朴,  
Hou Pu), Rhizoma  
Alismatis(泽泻, Ze  
Xie), Radix et  
Rhizoma Rhei(大  
黄, Da Huang),  
Bombyx

control of  
COVID-19 in  
Tianjin

Mild  
Symptoms

Decoction  
and  
Shengjiang  
Powder

00

Decoction: 1,  
Shengjiang  
Powder: 1  
Decoction : 1,  
Shengjian  
g Powder:  
1/2

|    |                                                                                                                              |                                                                                                                                                                                                                                                                                                                                                                                                                                                                                                         |                                                                                                           |                                             |                                                                                  |     |     |                  |                                                                                         |                                                                                               |      |
|----|------------------------------------------------------------------------------------------------------------------------------|---------------------------------------------------------------------------------------------------------------------------------------------------------------------------------------------------------------------------------------------------------------------------------------------------------------------------------------------------------------------------------------------------------------------------------------------------------------------------------------------------------|-----------------------------------------------------------------------------------------------------------|---------------------------------------------|----------------------------------------------------------------------------------|-----|-----|------------------|-----------------------------------------------------------------------------------------|-----------------------------------------------------------------------------------------------|------|
| 90 | <p>Xuanbai<br/>Chengqi<br/>Decoction, Hua<br/>nglian Jiedu<br/>Decoction<br/>and Modified<br/>Jiedu Huoxue<br/>Decoction</p> | <p>Batryticatus(僵蚕,<br/>Jiang Can),<br/>Periostracum<br/>Cicadae(蝉蜕, Chan<br/>Tui), Poria(茯苓, Fu<br/>Ling), Radix<br/>Platycodonis(桔梗,<br/>Jie Geng), Rhizoma<br/>Cynanchi<br/>Stauntonii(白前,<br/>Bai Qian)<br/>Herba Ephedrae(麻<br/>黄, Ma Huang)8g,<br/>Semen Armeniacae<br/>Amarum(杏仁,<br/>Xing Ren)12g,<br/>Gypsum<br/>Fibrosum(生石膏,<br/>Sheng Shi Gao)30g,<br/>Radix et Rhizoma<br/>Rhei(生大黄, Sheng<br/>Da Huang)10g,<br/>Fructus<br/>Trichosanthis(瓜蒌,<br/>Gua Lou)仁 30g,<br/>Semen Persicae(桃</p> | <p>The prevention and<br/>control of<br/>COVID-19 in<br/>Guangdong<br/>province (Trial<br/>version 1)</p> | <p>Treatment/<br/>Progressive<br/>stage</p> | <p>Maxing<br/>Shigan<br/>Decoction<br/>and Xuanbai<br/>Chengqi<br/>Decoction</p> | 4/4 | 3/4 | 75.00/100.<br>00 | <p>Maxing<br/>Shigan<br/>Decoction:<br/>1, Xuanbai<br/>Chengqi<br/>Decoction:<br/>1</p> | <p>Maxing<br/>Shigan<br/>Decoction<br/>: 1,<br/>Xuanbai<br/>Chengqi<br/>Decoction<br/>: 1</p> | 90GD |
|----|------------------------------------------------------------------------------------------------------------------------------|---------------------------------------------------------------------------------------------------------------------------------------------------------------------------------------------------------------------------------------------------------------------------------------------------------------------------------------------------------------------------------------------------------------------------------------------------------------------------------------------------------|-----------------------------------------------------------------------------------------------------------|---------------------------------------------|----------------------------------------------------------------------------------|-----|-----|------------------|-----------------------------------------------------------------------------------------|-----------------------------------------------------------------------------------------------|------|

仁, Tao Ren)10g,  
Radix Paeoniae  
Rubra(赤芍, Chi  
Shao)15g, Semen  
Lepidii(葶苈子,  
Ting Li Zi)20g,  
Rhizoma  
Coptidis(黄连,  
Huang Lian)3g,  
Radix  
Scutellariae(黄芩,  
Huang Qin)10g,  
Cortex Mori(桑白  
皮, Sang Bai  
Pi)10g, Rhizoma  
Paridis(重楼,  
Chong Lou)10g,  
Moutan Cortex(丹  
皮, Dan Pi)15g,  
Radix Curcumae(郁  
金, Yu Jin)15g,  
Rhizoma Acori  
Tatarinowii(石菖蒲,  
Shi Chang Pu)15g,  
Radix Rehmanniae  
Recens(生地, Sheng

|    |                                        |                                                                                                                                                                                                                                                                                                                                                                                                                                                                                |                                                               |                                    |                                                                      |     |     |                  |                                                                            |                                                                                 |      |
|----|----------------------------------------|--------------------------------------------------------------------------------------------------------------------------------------------------------------------------------------------------------------------------------------------------------------------------------------------------------------------------------------------------------------------------------------------------------------------------------------------------------------------------------|---------------------------------------------------------------|------------------------------------|----------------------------------------------------------------------|-----|-----|------------------|----------------------------------------------------------------------------|---------------------------------------------------------------------------------|------|
| 91 | Modified<br>Maxing Shigan<br>Decoction | Di)15g, Radix<br>Scrophulariae(玄参,<br>Xuan She)15g<br>Semen Armeniacae<br>Amarum(杏仁,<br>Xing Ren)10g,<br>Gypsum<br>Fibrosum(生石膏,<br>Sheng Shi Gao)30g,<br>Fructus<br>Trichosanthis(瓜<br>蒌,Gua Lou)30g,<br>Radix et Rhizoma<br>Rhei(生大黄, Sheng<br>Da Huang)6g(After<br>decoction),Herba<br>Ephedrae(生/炙麻<br>黄, Sheng/Zhi Ma<br>Huang) respectively<br>6g, Semen<br>Lepidii(葶苈<br>子,Ting Li Zi)10g,<br>Semen Persicae(桃<br>仁, Tao Ren)10g,<br>Fructus Tsaoko(草<br>果, Cao Guo)6g, | Diagnosis and<br>treatment of<br>COVID-19(Trial<br>version 5) | Treatment/<br>Progressive<br>stage | Xuanbai<br>Chengqi<br>Decoction<br>and Maxing<br>Shigan<br>Decoction | 4/4 | 4/3 | 100.00/75.<br>00 | Xuanbai<br>Chengqi<br>Decoction:<br>1, Maxing<br>Shigan<br>Decoction:<br>1 | Xuanbai<br>Chengqi<br>Decoction<br>: 1,<br>Maxing<br>Shigan<br>Decoction<br>: 1 | 91 5 |
|----|----------------------------------------|--------------------------------------------------------------------------------------------------------------------------------------------------------------------------------------------------------------------------------------------------------------------------------------------------------------------------------------------------------------------------------------------------------------------------------------------------------------------------------|---------------------------------------------------------------|------------------------------------|----------------------------------------------------------------------|-----|-----|------------------|----------------------------------------------------------------------------|---------------------------------------------------------------------------------|------|

|    |                                            |                                                                                                                                                                                                                                                                                                                                                                                                                                  |                                                                                                                       |                           |                                            |      |     |                    |                                               |                                                |      |
|----|--------------------------------------------|----------------------------------------------------------------------------------------------------------------------------------------------------------------------------------------------------------------------------------------------------------------------------------------------------------------------------------------------------------------------------------------------------------------------------------|-----------------------------------------------------------------------------------------------------------------------|---------------------------|--------------------------------------------|------|-----|--------------------|-----------------------------------------------|------------------------------------------------|------|
| 92 | Maxing Shigan<br>Decoction, Yinqiao Powder | Semen Arecae(槟榔, Bin Lang)10g,<br>Rhizoma<br>Atractylodis(苍术, Cang Shu)10g<br>Herba Ephedrae(麻黄, Ma Huang)10g,<br>Semen Armeniacae<br>Amarum(杏仁, Xing Ren)10-15g,<br>Gypsum<br>Fibrosum(石膏, Shi Gao)20-30g, Cortex Mori(桑白皮, Sang Bai Pi)15g, Flos Lonicerae(金银花, Jin Yin Hua)20-30g,<br>Fructus Forsythiae(连翘, Lian Qiao)20-30g,<br>Radix Scutellariae(黄芩, Huang Qin)15g,<br>Bulbus Fritillariae Thunbergii(Bulbus Fritillariae | Sichuan provincial administration of TCM/The prevention and control of COVID-19 in Sichuan province (Trial version 1) | Treatment/<br>Acute stage | Maxing Shigan Decoction and Yinqiao Powder | 4/10 | 4/3 | 100.00%/3<br>0.00% | Maxing Shigan Decoction: 1, Yinqiao Powder: 1 | Maxing Shigan Decoction : 1, Yinqiao Powder: 0 | 92SC |
|----|--------------------------------------------|----------------------------------------------------------------------------------------------------------------------------------------------------------------------------------------------------------------------------------------------------------------------------------------------------------------------------------------------------------------------------------------------------------------------------------|-----------------------------------------------------------------------------------------------------------------------|---------------------------|--------------------------------------------|------|-----|--------------------|-----------------------------------------------|------------------------------------------------|------|

|    |                                                                                                  |                                                                                                                                                                                                                                                                                                                                                                                                                                                        |                                                                                               |                                    |                                                                                                                                         |          |         |                                    |                                                                                                                                               |                                                                                                                                                      |      |
|----|--------------------------------------------------------------------------------------------------|--------------------------------------------------------------------------------------------------------------------------------------------------------------------------------------------------------------------------------------------------------------------------------------------------------------------------------------------------------------------------------------------------------------------------------------------------------|-----------------------------------------------------------------------------------------------|------------------------------------|-----------------------------------------------------------------------------------------------------------------------------------------|----------|---------|------------------------------------|-----------------------------------------------------------------------------------------------------------------------------------------------|------------------------------------------------------------------------------------------------------------------------------------------------------|------|
| 93 | Maxing Shigan<br>Decoction,Ganlu<br>Xiaodu<br>micropills<br>and Modified<br>Shengjiang<br>Powder | Thunbergii(浙贝母,<br>Zhe Bei Mu)母, Zhe<br>Bei Mu)15g, Radix<br>Glycyrrhizae(生甘<br>草, Sheng Gan<br>Cao)5-10g<br>Herba Ephedrae(生<br>麻黄, Sheng Ma<br>Huang)8g, Semen<br>Armeniacae<br>Amarum(杏仁,<br>Xing Ren)12g,<br>Gypsum<br>Fibrosum(生石膏,<br>Sheng Shi Gao)30g,<br>Radix<br>Glycyrrhizae(生甘<br>草, Sheng Gan<br>Cao)10g,<br>Talcum(滑石, Hua<br>Shi)30g, Herba<br>Artemisiae<br>Scopariae(茵陈, Yin<br>Chen)20g, Radix<br>Scutellariae(黄芩,<br>Huang Qin)15g, | The prevention and<br>control of<br>COVID-19 in<br>Guangdong<br>province (Trial<br>version 1) | Treatment/<br>Progressive<br>stage | Maxing<br>Shigan<br>Decoction<br>and Ganlu<br>Xiaodu<br>micropills<br>and<br>Shengjiang<br>Powder and<br>Xijiao<br>Dihuang<br>Decoction | 4/11/4/4 | 4/5/4/3 | 100.00/45.<br>45/100.00/<br>100.00 | Maxing<br>Shigan<br>Decoction:<br>1, Ganlu<br>Xiaodu<br>micropills:<br>1,<br>Shengjiang<br>Powder: 1,<br>Xijiao<br>Dihuang<br>Decoction:<br>0 | Maxing<br>Shigan<br>Decoction<br>: 1, Ganlu<br>Xiaodu<br>micropills<br>: 1,<br>Shengjian<br>g Powder:<br>1,<br>Xijiao<br>Dihuang<br>Decoction<br>: 1 | 93GD |
|----|--------------------------------------------------------------------------------------------------|--------------------------------------------------------------------------------------------------------------------------------------------------------------------------------------------------------------------------------------------------------------------------------------------------------------------------------------------------------------------------------------------------------------------------------------------------------|-----------------------------------------------------------------------------------------------|------------------------------------|-----------------------------------------------------------------------------------------------------------------------------------------|----------|---------|------------------------------------|-----------------------------------------------------------------------------------------------------------------------------------------------|------------------------------------------------------------------------------------------------------------------------------------------------------|------|

Fructus Amomi  
Rotundus(Fructus  
Amomi  
Rotundus(豆蔻,  
Dou Kou), Dou  
Kou)10g(After  
decoction), Herba  
Agastaches(藿香,  
Huo Xiang)15g, 法  
Rhizoma  
Pinelliae(半夏, Ban  
Xia)15g, Rhizoma  
Atractylodis(苍术,  
Cang Shu)15g,  
Semen Lepidii(葶苈  
子, Ting Li Zi)20g,  
Fructus  
Forsythiae(连翘,  
Lian Qiao)15g, 白  
Bombyx  
Batryticatus(僵蚕,  
Jiang Can)5g,  
Periostracum  
Cicadae(蝉蜕, Chan  
Tui)5g, Rhizoma  
Curcumae

|    |                                                 |                                                                                                                                                                                                                                                                                                                                                  |                                                     |                              |                             |      |      |              |                             |                              |      |
|----|-------------------------------------------------|--------------------------------------------------------------------------------------------------------------------------------------------------------------------------------------------------------------------------------------------------------------------------------------------------------------------------------------------------|-----------------------------------------------------|------------------------------|-----------------------------|------|------|--------------|-----------------------------|------------------------------|------|
|    |                                                 | Longae(姜黄, Jiang Huang)10g, Radix et Rhizoma Rhei(生大黄, Sheng Da Huang)5g, Rhizoma Paridis(重楼, Chong Lou)10g, Moutan Cortex(丹皮, Dan Pi)15g, Radix Paeoniae Rubra(赤芍, Chi Shao)15g, Radix Curcumae(郁金, Yu Jin)15g, Rhizoma Acori Tatarinowii(石菖蒲, Shi Chang Pu)15g, Radix Rehmanniae Recens(生地, Sheng Di)15g, Radix Scrophulariae(玄参, Xuan She)15g |                                                     |                              |                             |      |      |              |                             |                              |      |
| 94 | Huopu Xialing Decoction and Modified Xiaochaihu | Herba Agastaches(藿香, Huo Xiang)10g(After                                                                                                                                                                                                                                                                                                         | The prevention and control of COVID-19 in Guangdong | Treatment/ Preliminary stage | Huopu Xialing Decoction and | 11/7 | 11/6 | 100.00/85.71 | Huopu Xialing Decoction: 1, | Huopu Xialing Decoction : 1, | 94GD |



Decoction  
decoction), Cortex  
Magnoliae  
Officinalis(厚朴,  
Hou Pu)10g, 法  
Rhizoma  
Pinelliae(半夏, Ban  
Xia)10g, Poria(茯  
苓, Fu Ling)15g,  
Radix Bupleuri(柴  
胡, Chai Hu)15g,  
Radix  
Scutellariae(黄芩,  
Huang Qin)10g,  
Radix  
Codonopsis(党参,  
Dang Shen)10g,  
Semen Armeniacae  
Amarum(杏仁,  
Xing Ren)10g,  
Semen Coicis(薏苡  
仁, Yi Yi Ren)20g,  
Polyporus  
Umbellatus(猪苓,  
Zhu Ling)10g,  
Rhizoma  
Alismatis(泽泻, Ze

province (Trial  
version 1)

Xiaochaihu  
Decoction

Xiaochaihu  
Decoction:  
1  
Xiaochaihu  
Decoction  
: 1



Xuan She), Radix  
Rehmanniae  
Recens(生地, Sheng  
Di), Moutan  
Cortex(丹皮, Dan  
Pi), Lophatherum  
gracile(淡竹叶, Dan  
Zhu Ye), Flos  
Lonicerae(金银花,  
Jin Yin Hua),  
Fructus  
Forsythiae(连翘,  
Lian Qiao), Radix  
Scutellariae(黄芩,  
Huang Qin),  
Gardenia  
jasminoides Ellis(梔  
子, Zhi Zi), Herba  
Menthae  
Heplocalycis(薄荷,  
Bo He), Radix  
Paeoniae Rubra(赤  
芍, Chi Shao),  
Radix Curcumae(郁  
金, Yu Jin), Semen  
Lepidii(葶苈子,



Officinalis(厚朴,  
Hou Pu)15g,  
Rhizoma  
Atractylodis  
Macrocephalae(白  
术, Bai Zhu)30g,  
Rhizoma  
Pinelliae(半夏, Ban  
Xia)15g, (建曲, Jian  
Qu)15g, Semen  
Coicis(薏苡仁, Yi  
Yi Ren)30g,  
Poria(茯苓, Fu  
Ling)30g, Fructus  
Amomi  
Rotundus(Fructus  
Amomi  
Rotundus(豆蔻,  
Dou Kou), Dou  
Kou)15g, Semen  
Armeniaca  
Amarum(杏仁,  
Xing Ren)15g,  
Crataegus  
pinnatifida(焦山楂,  
Jiao Shan Zha)30g,

|    |                                        |                                                                                                                                                                                                                                                                                                                                                                                                                                                                      |                                                            |                                   |                               |    |   |       |   |     |
|----|----------------------------------------|----------------------------------------------------------------------------------------------------------------------------------------------------------------------------------------------------------------------------------------------------------------------------------------------------------------------------------------------------------------------------------------------------------------------------------------------------------------------|------------------------------------------------------------|-----------------------------------|-------------------------------|----|---|-------|---|-----|
| 97 | Modified<br>Chaihu Dayuan<br>Decoction | Semen Dolichoris<br>Album(白扁豆, Bai<br>Bian Dou)30g,<br>Rhizoma<br>Phragmitis(芦根,<br>Lu Gen)30g<br>Radix Bupleuri(柴<br>胡, Chai Hu), Radix<br>Scutellariae(黄芩,<br>Huang Qin),<br>Fructus Aurantii(枳<br>壳, Zhi Qiao),<br>Fructus Tsaoko(草<br>果, Cao Guo),<br>Semen Armeniacae<br>Amarum(杏仁,<br>Xing Ren), Cortex<br>Magnoliae<br>Officinalis(厚朴,<br>Hou Pu), Semen<br>Arecae(槟榔, Bin<br>Lang), Herba<br>Agastaches(藿香,<br>Huo Xiang),<br>Talcum(滑石, Hua<br>Shi), Bulbus | The prevention and<br>control of<br>COVID-19 in<br>Tianjin | Treatment/<br>Critical<br>illness | Chaihu<br>Dayuan<br>Decoction | 10 | 6 | 60.00 | 1 | 3/6 |
|----|----------------------------------------|----------------------------------------------------------------------------------------------------------------------------------------------------------------------------------------------------------------------------------------------------------------------------------------------------------------------------------------------------------------------------------------------------------------------------------------------------------------------|------------------------------------------------------------|-----------------------------------|-------------------------------|----|---|-------|---|-----|



Gan Cao)10g,  
 Semen Arecae(槟榔, Bin Lang)10g,  
 Cortex Magnoliae  
 Officinalis(厚朴,  
 Hou Pu)10g,  
 Fructus Tsaoko(草果, Cao Guo)10g,  
 Rhizoma  
 Anemarrhenae(知母, Zhi Fu)10g,  
 Radix Paeoniae  
 Alba(白芍, Bai Shao)10g, Radix  
 Scutellariae(黄芩,  
 Huang Qin)15g,  
 Radix  
 Glycyrrhizae(甘草,  
 Gan Cao)5g  
 Radix  
 Scutellariae(黄芩,  
 Huang Qin)15g,  
 Rhizoma  
 Anemarrhenae(知母, Zhi Fu)10g,  
 Herba Ephedrae(麻

The prevention and  
 control of  
 COVID-19 in  
 Beijin (Version 2)

Treatment/  
 Ordinary  
 type

Maxing  
 Shigan  
 Decoction  
 and Maxing  
 Yigan  
 Decoction  
 and Sanren

4/4/8

3/3/3

75.00/75.0  
 0/37.50

Maxing  
 Shigan  
 Decoction:  
 1/2,  
 Maxing  
 Yigan  
 Decoction:  
 Maxing  
 Shigan  
 Decoction  
 : 1,  
 Maxing  
 Yigan  
 Decoction

99BJ



|                                                                                                                                                                                                                                                                                                                                                                                                                                                                  |                                                                      |                           |                                               |       |       |                        |                                                                 |                                                                                                                     |       |
|------------------------------------------------------------------------------------------------------------------------------------------------------------------------------------------------------------------------------------------------------------------------------------------------------------------------------------------------------------------------------------------------------------------------------------------------------------------|----------------------------------------------------------------------|---------------------------|-----------------------------------------------|-------|-------|------------------------|-----------------------------------------------------------------|---------------------------------------------------------------------------------------------------------------------|-------|
| 黄, Ma Huang)10g,<br>Semen Armeniacae<br>Amarum(杏仁,<br>Xing Ren)9g,<br>Fructus Amomi<br>Rotundus(豆蔻,<br>Dou Kou)6g,<br>Semen Coicis(薏苡<br>仁, Yi Yi Ren)30g,<br>Cortex Mori(桑白<br>皮, Sang Bai<br>Pi)15g, Rhizoma<br>Atractylodis(苍术,<br>Cang Shu)10g,<br>Radix Astragali seu<br>Hedysari(生黄芪,<br>Sheng Huang<br>Qi)10g, Semen<br>Lepidii(葶苈子,<br>Ting Li Zi)15g<br>Herba Ephedrae(麻<br>黄, Ma Huang)4g,<br>Gypsum<br>Fibrosum(生石膏,<br>Sheng Shi Gao)20g,<br>Rhizoma | The prevention and<br>control of<br>COVID-19 in<br>Beijin(Version 2) | Treatment<br>for children | Decoction<br>and Maxing<br>Yigan<br>Decoction | 4/4/4 | 3/3/4 | 75.00/75.0<br>0/100.00 | 1, Sanren<br>Decoction:<br>0<br>: 1, Sanren<br>Decoction<br>: 1 | Maxing<br>Shigan<br>Decoction:<br>1,<br>Maxing<br>Yigan<br>Maxing<br>Shigan<br>Decoction<br>: 1,<br>Maxing<br>Yigan | 100BJ |
|------------------------------------------------------------------------------------------------------------------------------------------------------------------------------------------------------------------------------------------------------------------------------------------------------------------------------------------------------------------------------------------------------------------------------------------------------------------|----------------------------------------------------------------------|---------------------------|-----------------------------------------------|-------|-------|------------------------|-----------------------------------------------------------------|---------------------------------------------------------------------------------------------------------------------|-------|





|                                                                                                                                                                                                                                                                                                                    |                                                             |                                         |                                                             |             |            |                     |                                                             |                                                              |              |
|--------------------------------------------------------------------------------------------------------------------------------------------------------------------------------------------------------------------------------------------------------------------------------------------------------------------|-------------------------------------------------------------|-----------------------------------------|-------------------------------------------------------------|-------------|------------|---------------------|-------------------------------------------------------------|--------------------------------------------------------------|--------------|
| <p>Sheng Huang Qi)9g, Rhizoma Atractylodis Macrocephalae(炒白术, Chao Bai Zhu)6g, Radix Saposhnikoviae(防风, Fang Feng)3g, Radix Scrophulariae(玄参, Xuan She)6g, Bulbus Lili(百合, Bai He)9g, Radix Platycodonis(桔梗, Jie Geng)6g, Cortex Magnoliae Officinalis(厚朴, Hou Pu)6g, Radix Glycyrrhizae(生甘草, Sheng Gan Cao)6g</p> | <p>COVID-19 in Shanxi province</p>                          | <p>Treatment/<br/>Mild<br/>Symptoms</p> | <p>Maxing<br/>Shigan<br/>Decoction<br/>and<br/>Huoxiang</p> | <p>4/13</p> | <p>4/6</p> | <p>100.00/46.15</p> | <p>Maxing<br/>Shigan<br/>Decoction:<br/>1,<br/>Huoxiang</p> | <p>Maxing<br/>Shigan<br/>Decoction<br/>: 1,<br/>Huoxiang</p> | <p>103 6</p> |
| <p>Herba Ephedrae(生麻黄, Sheng Ma Huang)6g, Gypsum Fibrosum(生石膏, Sheng Shi Gao)15g,</p>                                                                                                                                                                                                                              | <p>Diagnosis and treatment of COVID-19(Trial version 6)</p> |                                         |                                                             |             |            |                     |                                                             |                                                              |              |

Semen Armeniacae  
Amarum(杏仁,  
Xing Ren)9g,  
Rhizoma et Radix  
Notopterygii(羌  
活,Qiang Huo)15g,  
Semen Lepidii(葶苈  
子,Ting Li Zi)15g,  
RhizomaCyrtoniiF  
ortunei(贯众, Guan  
Zhong)9g,  
Lumbricus(地龙, Di  
Long)15g, Radix  
Cynanchi  
Paniculati(徐长卿,  
Xu Chang  
Qing)15g, Herba  
Agastaches(藿香,  
Huo Xiang)15g,  
Herba Eupatorii(佩  
兰, Pei Lan)9g,  
Rhizoma  
Atractylodis(苍术,  
Cang Shu)15g,  
Poria(茯苓, Fu  
Ling)45g, 生

Zhengqi  
Powder

Zhengqi      Zhengqi  
Powder: 1      Powder:  
2/4

|     |                                 |                                                                                                                                                                                                                                                                                                                                                                                                                                                                                                       |                                                               |                                |                               |    |   |       |   |     |
|-----|---------------------------------|-------------------------------------------------------------------------------------------------------------------------------------------------------------------------------------------------------------------------------------------------------------------------------------------------------------------------------------------------------------------------------------------------------------------------------------------------------------------------------------------------------|---------------------------------------------------------------|--------------------------------|-------------------------------|----|---|-------|---|-----|
| 104 | Modified<br>Dayuan<br>Decoction | <p>Rhizoma<br/>Atractylodis<br/>Macrocephalae(白<br/>术, Bai Zhu)30g,<br/>(焦三仙, Jiao San<br/>Xian)各 9g, Cortex<br/>Magnoliae<br/>Officinalis(厚朴,<br/>Hou Pu)15g, Semen<br/>Arecae(槟榔, Bin<br/>Lang)9g, Fructus<br/>Tsaoko(草果, Cao<br/>Guo)9g, Rhizoma<br/>Zingiberis<br/>Recens(生姜, Sheng<br/>Jiang)15g<br/>Semen Arecae(槟<br/>榔, Bin Lang)10g,<br/>Fructus Tsaoko(草<br/>果, Cao Guo)10g,<br/>Cortex Magnoliae<br/>Officinalis(厚朴,<br/>Hou Pu)10g,<br/>Rhizoma<br/>Anemarrhenae(知<br/>母, Zhi Fu)10g,</p> | Diagnosis and<br>treatment of<br>COVID-19(Trial<br>version 6) | Treatment/<br>Mild<br>Symptoms | Chaihu<br>Dayuan<br>Decoction | 10 | 5 | 50.00 | 1 | 3/6 |
|-----|---------------------------------|-------------------------------------------------------------------------------------------------------------------------------------------------------------------------------------------------------------------------------------------------------------------------------------------------------------------------------------------------------------------------------------------------------------------------------------------------------------------------------------------------------|---------------------------------------------------------------|--------------------------------|-------------------------------|----|---|-------|---|-----|

Radix  
 Scutellariae(黄芩,  
 Huang Qin)10g,  
 Radix Bupleuri(柴  
 胡, Chai Hu)10g,  
 Radix Paeoniae  
 Rubra(赤芍, Chi  
 Shao)10g, Fructus  
 Forsythiae(连翘,  
 Lian Qiao)15g,  
 Herba Artemisiae  
 Annuae(青蒿, Qing  
 Hao)10g(After  
 decoction),  
 Rhizoma  
 Atractylodis(苍术,  
 Cang Shu)10g,  
 Folium Isatidis(大  
 青叶, Da Qing  
 Ye)10g, Radix  
 Glycyrrhizae(生甘  
 草, Sheng Gan  
 Cao)5g

|     |                                                |                                                     |                                                 |                                |                               |     |     |                   |                                |                               |       |
|-----|------------------------------------------------|-----------------------------------------------------|-------------------------------------------------|--------------------------------|-------------------------------|-----|-----|-------------------|--------------------------------|-------------------------------|-------|
| 105 | Maxing Shigan<br>Decoction,Mod<br>ified Maxing | Herba Ephedrae(生<br>麻黄, Sheng Ma<br>Huang)6g, Semen | Diagnosis and<br>treatment of<br>COVID-19(Trial | Treatment/<br>Ordinary<br>type | Maxing<br>Shigan<br>Decoction | 4/4 | 4/4 | 100.00/100<br>.00 | Maxing<br>Shigan<br>Decoction: | Maxing<br>Shigan<br>Decoction | 105 6 |
|-----|------------------------------------------------|-----------------------------------------------------|-------------------------------------------------|--------------------------------|-------------------------------|-----|-----|-------------------|--------------------------------|-------------------------------|-------|

Yigan  
Decoction

Armeniacaecae version 6)  
Amarum(杏仁,  
Xing Ren)15g,  
Gypsum  
Fibrosus(生石膏,  
Sheng Shi Gao)30g,  
Semen Coicis(生薏  
苡仁,Sheng Yi Yi  
Ren)30g, Rhizoma  
Atractylodis(苍术,  
Cang Shu)10g,  
Herba  
Agastaches(藿香,  
Huo Xiang)15g,  
Herba Artemisiae  
Annuae(青蒿, Qing  
Hao)12g, Rhizoma  
Polygoni  
Cuspidati(Rhizoma  
Polygoni  
Cuspidati(虎杖, Hu  
Zhang),Hu  
Zhang)20g, Herba  
Herba Verbenae(马  
鞭草, Ma Bian  
Cao)30g, Rhizoma

and  
Maxing  
Yigan  
Decoction

1, Maxing : 1,  
Yigan Maxing  
Decoction: Yigan  
1 Decoction  
: 1



|     |                                                                                                      |                                                                                                                                                                                                                                                                                                                                                                                                                                                                     |                                                                                                                                      |                                   |                                                                    |      |     |                  |                                                                          |                                                                              |         |
|-----|------------------------------------------------------------------------------------------------------|---------------------------------------------------------------------------------------------------------------------------------------------------------------------------------------------------------------------------------------------------------------------------------------------------------------------------------------------------------------------------------------------------------------------------------------------------------------------|--------------------------------------------------------------------------------------------------------------------------------------|-----------------------------------|--------------------------------------------------------------------|------|-----|------------------|--------------------------------------------------------------------------|------------------------------------------------------------------------------|---------|
| 106 | Maxing Shigan<br>Decoction and<br>Modified<br>Huoxiang<br>Zhengqi<br>Powder, Huashi<br>Baidu formula | Phragmitis(芦根,<br>Lu Gen)30g, Semen<br>Lepidii(葶苈子,<br>Ting Li Zi)15g,<br>Citri Grandis<br>Exocarpium(化橘<br>红, Huajuhong)15g,<br>Radix<br>Glycyrrhizae(生甘<br>草, Sheng Gan<br>Cao)10g<br>Herba Ephedrae(生<br>麻黄, Sheng Ma<br>Huang)6g, Gypsum<br>Fibrosum(生石膏,<br>Sheng Shi Gao)15g,<br>Semen Armeniacae<br>Amarum(杏仁,<br>Xing Ren)9g, Radix<br>Glycyrrhizae(甘草,<br>Gan Cao)3g, Herba<br>Agastaches(藿香,<br>Huo<br>Xiang)10g(After<br>decoction), Cortex<br>Magnoliae | 1, Diagnosis and<br>treatment of<br>COVID-19(Trial<br>version 6)<br>2, Diagnosis and<br>treatment of<br>COVID-19(Trial<br>version 7) | Treatment/<br>Critical<br>illness | Maxing<br>Shigan<br>Decoction<br>and Huopu<br>Xialing<br>Decoction | 4/11 | 4/4 | 100.00/36.<br>36 | Maxing<br>Shigan<br>Decoction:<br>1, Huopu<br>Xialing<br>Decoction:<br>1 | Maxing<br>Shigan<br>Decoction<br>: 1, Huopu<br>Xialing<br>Decoction<br>: 1/3 | 106hsbd |
|-----|------------------------------------------------------------------------------------------------------|---------------------------------------------------------------------------------------------------------------------------------------------------------------------------------------------------------------------------------------------------------------------------------------------------------------------------------------------------------------------------------------------------------------------------------------------------------------------|--------------------------------------------------------------------------------------------------------------------------------------|-----------------------------------|--------------------------------------------------------------------|------|-----|------------------|--------------------------------------------------------------------------|------------------------------------------------------------------------------|---------|

Officinalis(厚朴,  
 Hou Pu)10g,  
 Rhizoma  
 Atractylodis(苍术,  
 Cang Shu)15g,  
 Fructus Tsaoko(草  
 果, Cao Guo)10g,  
 Rhizoma  
 Pinelliae(半夏, Ban  
 Xia)9g, Poria(茯苓,  
 Fu Ling)15g, Radix  
 et Rhizoma Rhei(生  
 大黄, Sheng Da  
 Huang)5g(After  
 decoction), Radix  
 Astragali seu  
 Hedysari(生黄芪,  
 Sheng Huang  
 Qi)10g, Semen  
 Lepidii(葶苈  
 子, Ting Li Zi)10g,  
 Radix Paeoniae  
 Rubra(赤芍, Chi  
 Shao)10g

|     |                     |                                     |                                  |                        |                  |   |   |        |   |   |        |
|-----|---------------------|-------------------------------------|----------------------------------|------------------------|------------------|---|---|--------|---|---|--------|
| 107 | Yinhuang<br>Qingfei | Semen Lepidii(葶苈<br>子, Ting Li Zi), | The prevention and<br>control of | Recommen<br>ded use of | Maxing<br>Shigan | 4 | 4 | 100.00 | 1 | 1 | 107HuN |
|-----|---------------------|-------------------------------------|----------------------------------|------------------------|------------------|---|---|--------|---|---|--------|

|         |                                                                                                                                                                                                                                                                                                                                                                                                                                                                       |                                                    |                                     |           |
|---------|-----------------------------------------------------------------------------------------------------------------------------------------------------------------------------------------------------------------------------------------------------------------------------------------------------------------------------------------------------------------------------------------------------------------------------------------------------------------------|----------------------------------------------------|-------------------------------------|-----------|
| Capsule | Herba Ephedrae(麻黄, Ma Huang),<br>Semen Armeniacae<br>Amarum(杏仁, Xing Ren), Bulbus<br>Fritillariae<br>Thunbergii(Bulbus<br>Fritillariae<br>Thunbergii(浙贝母, Zhe Bei Mu), Zhe<br>Bei Mu), Folium<br>Eriobotryae(枇杷<br>叶, Pi Pa Ye),<br>Folium Isatidis(大<br>青叶, Da Qing Ye),<br>Rhizoma Acori<br>Tatarinowii(石菖蒲,<br>Shi Chang Pu),<br>Dioscorea<br>nipponica<br>Makino(穿山龙,<br>Chuan Shan Long),<br>Artemisia rupestris<br>L.(一枝蒿, Yi<br>Zhihao), Folium<br>Ginkgo(银杏叶, | COVID-19 in<br>Hunan province<br>(Trial version 3) | proprietary<br>Chinese<br>medicines | Decoction |
|---------|-----------------------------------------------------------------------------------------------------------------------------------------------------------------------------------------------------------------------------------------------------------------------------------------------------------------------------------------------------------------------------------------------------------------------------------------------------------------------|----------------------------------------------------|-------------------------------------|-----------|

|     |                       |                                                                                                                                                                                                                                                                                                                                                                                                                                                                                                                                |                                                                            |                                                  |                |    |   |       |   |   |        |
|-----|-----------------------|--------------------------------------------------------------------------------------------------------------------------------------------------------------------------------------------------------------------------------------------------------------------------------------------------------------------------------------------------------------------------------------------------------------------------------------------------------------------------------------------------------------------------------|----------------------------------------------------------------------------|--------------------------------------------------|----------------|----|---|-------|---|---|--------|
| 108 | Qingre Jiedu Granules | <p>Yin Xingye),<br/> Fructus Schisandrae<br/> Chinensis(五味子,<br/> Wu Wei Zi), Fructus<br/> Aurantii<br/> Immaturus(枳实,<br/> Zhi Shi), Gypsum<br/> Fibrosus(生石膏,<br/> Sheng Shi Gao),<br/> Radix<br/> Glycyrrhizae(甘草,<br/> Gan Cao)<br/> Flos Lonicerae(金<br/> 银花, Jin Yin Hua),<br/> Fructus<br/> Forsythiae(连翘,<br/> Lian Qiao), Cornu<br/> Bubali(水牛角,<br/> Shui Niu Jiao),<br/> Folium Isatidis(大<br/> 青叶, Da Qing Ye),<br/> Gypsum<br/> Fibrosus(石膏, Shi<br/> Gao), Rhizoma<br/> Coptidis(黄连,<br/> Huang Lian), Radix</p> | The prevention and control of COVID-19 in Hunan province (Trial version 3) | Recommended use of proprietary Chinese medicines | Yinqiao Powder | 10 | 2 | 20.00 | 1 | 0 | 108HuN |
|-----|-----------------------|--------------------------------------------------------------------------------------------------------------------------------------------------------------------------------------------------------------------------------------------------------------------------------------------------------------------------------------------------------------------------------------------------------------------------------------------------------------------------------------------------------------------------------|----------------------------------------------------------------------------|--------------------------------------------------|----------------|----|---|-------|---|---|--------|

|     |                                |                                    |                                       |                                                                    |     |     |                  |            |           |
|-----|--------------------------------|------------------------------------|---------------------------------------|--------------------------------------------------------------------|-----|-----|------------------|------------|-----------|
| 109 | Mahuang<br>Guigan<br>Decoction | Rehmanniae                         | Professor Ding's<br>empirical formula | Mahuang<br>Decoction<br>and Huangqi<br>Guizhi<br>Wuwu<br>Decoction | 4/5 | 3/5 | 75.00/100.<br>00 | Mahuang    | Mahuang   |
|     |                                | Recens(生地, Sheng Di), Rhizoma      |                                       |                                                                    |     |     |                  | Decoction: | Decoction |
|     |                                | Anemarrhenae(知母, Zhi Fu), Radix    |                                       |                                                                    |     |     |                  | 1,         | : 1,      |
|     |                                | Scrophulariae(玄参, Xuan She),       |                                       |                                                                    |     |     |                  | Huangqi    | Huangqi   |
|     |                                | Excipients are                     |                                       |                                                                    |     |     |                  | Guizhi     | Guizhi    |
|     |                                | dextrin,sucrose                    |                                       |                                                                    |     |     |                  | Wuwu       | Wuwu      |
|     |                                | Herba Ephedrae(麻黄, Ma Huang),      |                                       |                                                                    |     |     |                  | Decoction: | Decoction |
|     |                                | Radix Astragali seu                |                                       |                                                                    |     |     |                  | 1          | : 1       |
|     |                                | Hedysari(黄芪, Huang Qi),            |                                       |                                                                    |     |     |                  |            |           |
|     |                                | Ramulus                            |                                       |                                                                    |     |     |                  |            |           |
|     |                                | Cinnamomi(桂枝, Gui Zhi), Radix      |                                       |                                                                    |     |     |                  |            |           |
|     |                                | Glycyrrhizae(甘草, Gan Cao), Folium  |                                       |                                                                    |     |     |                  |            |           |
|     |                                | Artemisiae Argyi(艾叶, Ai Ye), Radix |                                       |                                                                    |     |     |                  |            |           |
|     |                                | Paeoniae Alba(芍药, Bai Shao),       |                                       |                                                                    |     |     |                  |            |           |
|     |                                | Ajuga decumbens                    |                                       |                                                                    |     |     |                  |            |           |
|     |                                | thunb (散血草, San Xuecao), Rhizoma   |                                       |                                                                    |     |     |                  |            |           |

|     |                                           |                                                                                                                                                                                                                                                                                                                                                                               |                                                               |                                |                                               |      |     |                  |                                                      |                                                      |         |
|-----|-------------------------------------------|-------------------------------------------------------------------------------------------------------------------------------------------------------------------------------------------------------------------------------------------------------------------------------------------------------------------------------------------------------------------------------|---------------------------------------------------------------|--------------------------------|-----------------------------------------------|------|-----|------------------|------------------------------------------------------|------------------------------------------------------|---------|
| 110 |                                           | Zingiberis(干姜,<br>Gan Jiang), Fructus<br>Jujubae(大枣, Da<br>Zao)<br>Radix Astragali seu<br>Hedysari(黄芪,<br>Huang Qi)<br>10g,Rhizoma<br>Atractylodis<br>Macrocephalae(白<br>术, Bai<br>Zhu)10g,Radix<br>Saposhnikoviae(防<br>风, Fang Feng)10g,<br>Flos Lonicerae(金<br>银花, Jin Yin<br>Hua)10g,Fructus<br>Forsythiae(连翘,<br>Lian<br>Qiao)10g,Rhizoma<br>Phragmitis(芦根,<br>Lu Gen)10g | Shanxi Provincial<br>Hospital of TCM                          |                                | Yupingfeng<br>Powder and<br>Yinqiao<br>Powder | 3/10 | 3/3 | 100.00/30.<br>00 | Yupingfen<br>g Powder:<br>1,<br>Yinqiao<br>Powder: 1 | Yupingfen<br>g Powder:<br>1,<br>Yinqiao<br>Powder: 0 | 110sxxf |
| 111 | Modified<br>Huoxiang<br>Zhengqi<br>Powder | Rhizoma<br>Atractylodis(苍术,<br>Cang Shu)15g,<br>Pericarpium Citri                                                                                                                                                                                                                                                                                                             | Diagnosis and<br>treatment of<br>COVID-19(Trial<br>version 4) | Treatment/<br>Ordinary<br>type | Huoxiang<br>Zhengqi<br>Powder                 | 13   | 5   | 38.50            | 1                                                    | 1/4                                                  |         |

|     |                                |                                                                                                                                                                                                                                                                                                                                                                                                                                                                                 |                                      |                                                               |                                   |                                                                   |     |     |                 |                                                         |                                                          |       |
|-----|--------------------------------|---------------------------------------------------------------------------------------------------------------------------------------------------------------------------------------------------------------------------------------------------------------------------------------------------------------------------------------------------------------------------------------------------------------------------------------------------------------------------------|--------------------------------------|---------------------------------------------------------------|-----------------------------------|-------------------------------------------------------------------|-----|-----|-----------------|---------------------------------------------------------|----------------------------------------------------------|-------|
| 112 | Qingfeitongluo<br>Prescription | Reticulatae(陈皮,<br>Chen Pi)10g,<br>Cortex Magnoliae<br>Officinalis(厚朴,<br>Hou Pu)10g, Herba<br>Agastaches(藿香,<br>Huo Xiang)10g,<br>Fructus Tsaoko(草<br>果, Cao Guo)6g,<br>Herba Ephedrae(生<br>麻黄, Sheng Ma<br>Huang)6g, Rhizoma<br>et Radix<br>Notopterygii(羌活,<br>Qiang Huo)10g,<br>Rhizoma Zingiberis<br>Recens(生姜, Sheng<br>Jiang)10g, Semen<br>Arecacae(槟榔, Bin<br>Lang)10g<br>Herba Ephedrae(麻<br>黄, Ma Huang)9g<br>Semen Armeniacae<br>Amarum(杏仁,<br>Xing Ren)9g<br>Gypsum | Gansu Provincial<br>Health Committee | Diagnosis and<br>treatment of<br>COVID-19(Trial<br>version 6) | Treatment/<br>Critical<br>illness | Maxing<br>Shigan<br>Decoction<br>and Maxing<br>Yigan<br>Decoction | 4/4 | 3/3 | 75.00/75.0<br>0 | Maxing<br>Shigan<br>Decoction:<br>1,<br>Maxing<br>Yigan | Maxing<br>Shigan<br>Decoction<br>: 1,<br>Maxing<br>Yigan | 112GS |
|-----|--------------------------------|---------------------------------------------------------------------------------------------------------------------------------------------------------------------------------------------------------------------------------------------------------------------------------------------------------------------------------------------------------------------------------------------------------------------------------------------------------------------------------|--------------------------------------|---------------------------------------------------------------|-----------------------------------|-------------------------------------------------------------------|-----|-----|-----------------|---------------------------------------------------------|----------------------------------------------------------|-------|





Schizonepetae(荆 (Revised edition)

芥, Jing Jie)15g

Fructus Arctii(牛蒡

子, Niu Bang

Zi)15g Herba

Menthae

Heplocalycis(薄荷,

Bo He)15g Radix

Platycodonis(桔梗,

Jie Geng)30g

Semen Armeniacae

Amarum(杏仁,

Xing Ren)15g

Herba

Agastaches(藿香,

Huo Xiang)15g

Cortex Magnoliae

Officinalis(厚朴,

Hou Pu) 15g

Poria(茯苓, Fu

Ling) 30g Rhizoma

Pinelliae(半夏, Ban

Xia)15g Fructus

Amomi

Rotundus(Fructus

Amomi

: 1





|     |                                                                   |                                                                                                                                                                                                                                                                                                                                                                                                                              |                                                                                                                              |                                 |                                                          |     |     |                  |                            |                                                           |
|-----|-------------------------------------------------------------------|------------------------------------------------------------------------------------------------------------------------------------------------------------------------------------------------------------------------------------------------------------------------------------------------------------------------------------------------------------------------------------------------------------------------------|------------------------------------------------------------------------------------------------------------------------------|---------------------------------|----------------------------------------------------------|-----|-----|------------------|----------------------------|-----------------------------------------------------------|
| 116 | Zhuye Shigao<br>Decoction and<br>Modified<br>Sijunzi<br>Decoction | Hou Pu)10-15g                                                                                                                                                                                                                                                                                                                                                                                                                | The Prescription for<br>the intervention of<br>TCM intervention<br>of COVID-19 in<br>sichuan<br>province(Trial<br>version 1) | Treatment/<br>Convalesce<br>nce | Zhuye<br>Shigao<br>Decoction<br>and Sijunzi<br>Decoction | 7/4 | 6/4 | 85.71/100.<br>00 | Zhuye                      | Zhuye                                                     |
|     |                                                                   | Radix<br>Scutellariae(黄芩,<br>Huang Qin)15g<br>Radix<br>Glycyrrhizae(生甘<br>草, Sheng Gan<br>Cao)5-10g。<br>Lophatherum<br>gracile(淡竹叶, Dan<br>Zhu Ye)15g,<br>Gypsum<br>Fibrosum(石膏, Shi<br>Gao)15-20g, Radix<br>Pseudostellariae(太<br>子参, Tai Zi<br>Shen)20-30g, Radix<br>Ophiopogonis(麦<br>冬, Mai<br>Dong)10-15g,<br>Rhizoma<br>Pinelliae(半夏, Ban<br>Xia)10g, Rhizoma<br>Atractylodis<br>Macrocephalae(白<br>朮, Bai Zhu)15-20g, |                                                                                                                              |                                 |                                                          |     |     |                  | Shigao<br>Decoction:<br>1, | Shigao<br>Decoction<br>: 1,<br>Sijunzi<br>Decoction:<br>1 |

|     |                                                                            |                                                                                                                                                                                                                          |                                                                                                                                                                                                                      |                                                                                               |                                 |                                                                   |      |     |                  |                                                                   |        |
|-----|----------------------------------------------------------------------------|--------------------------------------------------------------------------------------------------------------------------------------------------------------------------------------------------------------------------|----------------------------------------------------------------------------------------------------------------------------------------------------------------------------------------------------------------------|-----------------------------------------------------------------------------------------------|---------------------------------|-------------------------------------------------------------------|------|-----|------------------|-------------------------------------------------------------------|--------|
| 117 | Erchen<br>Decoction and<br>Modified<br>Wangshiqingsh<br>uyiqi<br>Decoction | Poria(茯苓, Fu<br>Ling)15-20g, Radix<br>Glycyrrhizae(甘草,<br>Gan Cao)5-10g<br>Radix Panacis<br>Quinquefolii(西洋<br>参, Xi Yang<br>Shen)20g, Herba<br>Dendrobii(石斛, Shi<br>Hu)10g, Radix<br>Ophiopogonis(麦<br>冬, Mai Dong)10g, | Rhizoma<br>Anemarrhena(知<br>母, Zhi Fu)10g,<br>Lophatherum<br>gracile(淡竹叶, Dan<br>Zhu Ye)10g,<br>Rhizoma<br>Coptidis(黄连,<br>Huang Lian)3g,<br>Radix<br>Glycyrrhizae(甘草,<br>Gan Cao)6g,<br>Poria(茯苓, Fu<br>Ling)15g, 法 | The prevention and<br>control of<br>COVID-19 in<br>Guangdong<br>province (Trial<br>version 1) | Treatment/<br>Convalesce<br>nce | Erchen<br>Decoction<br>and<br>Wangshiqing<br>shuyiqi<br>Decoction | 4/10 | 4/7 | 100.00/70.<br>00 | Erchen                                                            | Erchen |
|     |                                                                            | Decoction:<br>1,<br>Wangshiqi<br>ngshuyiqi<br>Decoction:<br>1/2                                                                                                                                                          |                                                                                                                                                                                                                      |                                                                                               |                                 |                                                                   |      |     |                  | Decoction<br>: 1,<br>Wangshiq<br>ingshuyiqi<br>Decoction<br>: 2/3 |        |

Rhizoma  
 Pinelliae(半夏, Ban  
 Xia)10g, Citri  
 Exocarpium  
 Rubrum(橘红, Ju  
 Hong)10g,  
 Pericarpium Citri  
 Reticulatae(陈皮,  
 Chen Pi)10g,  
 Fructus Hordei  
 Germinatus(炒麦  
 芽, Chao Mai  
 Ya)30g  
 Adenophora stricta  
 Miq.(沙参, Sha  
 Shen)15g, Radix  
 Ophiopogonis(麦  
 冬, Mai Dong)15g,  
 Radix Astragali seu  
 Hedysari(生黄芪,  
 Sheng Huang  
 Qi)15g, Massa  
 Medicata  
 Fermentata(神曲,  
 Shen Qu)20g, Radix  
 Paeoniae Rubra(赤

The prevention and  
 control of  
 COVID-19 in  
 Beijin(Version 2)

Treatment/  
 Convalesce  
 nce

Shashen  
 Maidong  
 Decoction  
 and Xiebai  
 Powder

7/4

2/4

28.57/100.  
00

Shashen  
 Maidong  
 Decoction:  
 1, Xiebai  
 Powder: 1  
 Shashen  
 Maidong  
 Decoction  
 : 1, Xiebai  
 Powder: 1

119

芍, Chi Shao)15g,  
 Cortex Mori(桑白  
 皮, Sang Bai  
 Pi)15g, Cortex  
 Lycii(地骨皮, Di  
 Gu Pi)15g, Fructus  
 Aurantii(枳壳, Zhi  
 Qiao)10g, Herba  
 Artemisiae  
 Annuae(青蒿, Qing  
 Hao)15g, Radix  
 Rehmanniae  
 Recens(生地, Shen  
 Di)15g  
 Radix  
 Pseudostellariae(太  
 子参, Tai Zi Shen)  
 15g(or Radix  
 Panacis  
 Quinquefolii(西洋  
 参, Xi Yang Shen)  
 15g), Radix  
 Ophiopogonis(麦  
 冬, Mai Dong) 18g,  
 Fructus Schisandrae  
 Chinensis(五味子,

The prevention and  
 control of  
 COVID-19 in  
 Shanxi province  
 (Trial)

Convalesce  
 nce

Shengjiang  
 Powder and  
 Shenling  
 Baizhu  
 Powder

3/10

3/5

100.00/50.  
 00

Shengmai  
 Decoction:  
 1,  
 Shenling  
 Baizhu  
 Powder2/3

Shengmai  
 Decoction  
 : 1,  
 Shenling  
 Baizhu  
 Powder1/  
 4

119SX1

Wu Wei Zi) 9g,  
 Rhizoma  
 Pinelliae(半夏, Ban  
 Xia) 9g,  
 Pericarpium Citri  
 Reticulatae(陈皮,  
 Chen Pi) 9g,  
 Poria(茯苓, Fu  
 Ling) 15g, Fructus  
 Amomi Villosi(砂  
 仁, Sha Ren) 6g,  
 Lablab purpureus  
 (Linn.) Sweet(扁豆,  
 ai Pian Dou) 15g  
 Rhizoma  
 Pinelliae(半夏, Ban  
 Xia)9g, Pericarpium  
 Citri Reticulatae(陈  
 皮, Chen Pi)10g,  
 Radix  
 Codonopsis(党参,  
 Dang Shen)15g,  
 Radix Astragali seu  
 Hedysari(黄芪,  
 Huang Qi)30g,  
 Poria(茯苓, Fu

Diagnosis and  
 treatment of  
 COVID-19(Trial  
 version 4)

Treatment/  
 Convalesce  
 nce

Erchen  
 Decoction

6

3

50.00

1

1



|     |                                  |                                                                                                                                                                                                                                                                     |                                                    |                                                |   |   |        |     |     |
|-----|----------------------------------|---------------------------------------------------------------------------------------------------------------------------------------------------------------------------------------------------------------------------------------------------------------------|----------------------------------------------------|------------------------------------------------|---|---|--------|-----|-----|
|     |                                  | Ling)15g, Herba<br>Agastaches(藿香,<br>Huo Xiang)10g,<br>Fructus Amomi<br>Villosi(砂仁, Sha<br>Ren)6g(After<br>decoction)<br>Radix Astragali seu<br>Hedysari(黄芪,<br>Huang Qi), Radix<br>Codonopsis(党参,<br>Dang Shen),<br>Poria(茯苓, Fu<br>Ling), Rhizoma<br>Atractylodis | The prevention and<br>control of                   | Huangqi                                        |   |   |        |     |     |
| 121 | Huangqi<br>Liujunzi<br>Decoction | Macrocephalae(白<br>术, Bai Zhu), 法<br>Rhizoma<br>Pinelliae(半夏, Ban<br>Xia), Pericarpium<br>Citri Reticulatae(陈<br>皮, Chen Pi), Radix<br>Glycyrrhizae(甘草,<br>Gan Cao)                                                                                                 | COVID-19 in<br>Hunan province<br>(Trial version 3) | Liujunzi<br>Decoction                          | 8 | 7 | 87.50  | 1/2 | 2/3 |
| 122 | Shashen<br>Maidong               | Adenophora stricta<br>Miq.(沙参, Sha                                                                                                                                                                                                                                  | The prevention and<br>control of                   | Treatment/<br>Convalesce<br>Shashen<br>Maidong | 7 | 7 | 100.00 | 1   | 1   |

|     |                                 |                                                                                                                                                                                                                                                                                                                                                                                                                                                                     |                                                                |                                 |                     |   |   |       |   |   |  |
|-----|---------------------------------|---------------------------------------------------------------------------------------------------------------------------------------------------------------------------------------------------------------------------------------------------------------------------------------------------------------------------------------------------------------------------------------------------------------------------------------------------------------------|----------------------------------------------------------------|---------------------------------|---------------------|---|---|-------|---|---|--|
|     | Decoction                       | Shen), Radix<br>Ophiopogonis(麦冬, Mai Dong),<br>Lablab purpureus<br>(Linn.) Sweet(扁豆,<br>Bai Pian Dou),<br>Folium Mori(桑叶,<br>Sang Ye), Rhizoma<br>Polygonati<br>Odorati(玉竹, Yu<br>Zhu), Radix<br>Trichosanthis(天花<br>粉, Tian Huafen),<br>Radix<br>Glycyrrhizae(甘草,<br>Gan Cao)<br>Rhizoma<br>Pinelliae(半夏, Ban<br>Xia)9g, Pericarpium<br>Citri Reticulatae(陈<br>皮, Chen Pi)10g,<br>Radix<br>Codonopsis(党参,<br>Dang Shen)15g,<br>Radix Astragali seu<br>Hedysari(黄芪, | COVID-19 in<br>Hunan province<br>(Trial version 3)             | nce                             | Decoction           |   |   |       |   |   |  |
| 123 | Modified<br>Erchen<br>Decoction |                                                                                                                                                                                                                                                                                                                                                                                                                                                                     | Diagnosis and<br>treatment of<br>COVID-19 (Trial<br>version 6) | Treatment/<br>Convalesce<br>nce | Erchen<br>Decoction | 6 | 4 | 66.70 | 1 | 1 |  |

|     |                                       |                                                                                                                                                                                                                                                                                                                                                                                                                                                                                                                                              |                                                                                                                |                                            |                                         |    |    |        |   |   |
|-----|---------------------------------------|----------------------------------------------------------------------------------------------------------------------------------------------------------------------------------------------------------------------------------------------------------------------------------------------------------------------------------------------------------------------------------------------------------------------------------------------------------------------------------------------------------------------------------------------|----------------------------------------------------------------------------------------------------------------|--------------------------------------------|-----------------------------------------|----|----|--------|---|---|
| 124 | Modified<br>Shenling<br>Baizhu Powder | <p>Huang Qi)30g,<br/> Poria(茯苓, Fu<br/> Ling)15g, Herba<br/> Agastaches(藿香,<br/> Huo Xiang)10g,<br/> Fructus Amomi<br/> Villosi(砂仁, Sha<br/> Ren)6g(After<br/> decoction), Radix<br/> Glycyrrhizae(甘草,<br/> Gan Cao)6g<br/> Radix Ginseng(生<br/> 晒参, Sheng Shai<br/> Shen)10g, Rhizoma<br/> Atractylodis<br/> Macrocephalae(炒<br/> 白术, Chao Bai<br/> Zhu)15g, Poria(茯<br/> 苓, Fu Ling)15g,<br/> Semen Dolichoris<br/> Album(白扁豆, Bai<br/> Bian Dou)30g,<br/> Fructus Amomi<br/> Villosi(砂仁, Sha<br/> Ren)6g(After<br/> decoction), Semen</p> | <p>The prevention and<br/> control of<br/> COVID-19 in<br/> Guangdong<br/> province (Trial<br/> version 1)</p> | <p>Treatment/<br/> Convalesce<br/> nce</p> | <p>Shenling<br/> Baizhu<br/> Powder</p> | 10 | 10 | 100.00 | 1 | 1 |
|-----|---------------------------------------|----------------------------------------------------------------------------------------------------------------------------------------------------------------------------------------------------------------------------------------------------------------------------------------------------------------------------------------------------------------------------------------------------------------------------------------------------------------------------------------------------------------------------------------------|----------------------------------------------------------------------------------------------------------------|--------------------------------------------|-----------------------------------------|----|----|--------|---|---|



|     |                                                  |                                                                                                                                                                                                                                                                                                                                                                                                                                                                      |                                                                                                                                            |                                 |                                                                |     |     |                  |                                                                       |                                                                         |                   |
|-----|--------------------------------------------------|----------------------------------------------------------------------------------------------------------------------------------------------------------------------------------------------------------------------------------------------------------------------------------------------------------------------------------------------------------------------------------------------------------------------------------------------------------------------|--------------------------------------------------------------------------------------------------------------------------------------------|---------------------------------|----------------------------------------------------------------|-----|-----|------------------|-----------------------------------------------------------------------|-------------------------------------------------------------------------|-------------------|
| 126 | Pneumonia V<br>(Shashen<br>Maidong<br>Decoction) | 子参, Tai Zi Shen),<br>Radix<br>Ophiopogonis(麦<br>冬, Mai Dong),<br>Rhizoma<br>Pinelliae(半夏, Ban<br>Xia), japonica<br>Rice(粳米, Jing<br>Mi), Rhizoma<br>Phragmitis(芦根,<br>Lu Gen), Fructus<br>Setariae<br>Germinatus(炒谷<br>芽, Chao Gu Ya),<br>Radix<br>Glycyrrhizae(生甘<br>草, Sheng Gan Cao)<br>Adenophora stricta<br>Miq.(沙参, Sha<br>Shen)15g, Radix<br>Ophiopogonis(麦<br>冬, Mai Dong)15g,<br>Fructus Schisandrae<br>Chinensis(五味子,<br>Wu Wei Zi)15g,<br>Radix Ginseng(人 | Agreement on the<br>prevention and<br>treatment of<br>COVID-19 in hubei<br>hospital of<br>traditional Chinese<br>medicine (1st<br>edition) | Treatment/<br>Convalesce<br>nce | Shashen<br>Maidong<br>Decoction<br>and<br>Shengjiang<br>Powder | 7/3 | 3/3 | 42.86/100.<br>00 | Shashen<br>Maidong<br>Decoction:<br>1,<br>Shengmai<br>Decoction:<br>1 | Shashen<br>Maidong<br>Decoction<br>: 1,<br>Shengmai<br>Decoction<br>: 1 | 126pneumonia<br>V |
|-----|--------------------------------------------------|----------------------------------------------------------------------------------------------------------------------------------------------------------------------------------------------------------------------------------------------------------------------------------------------------------------------------------------------------------------------------------------------------------------------------------------------------------------------|--------------------------------------------------------------------------------------------------------------------------------------------|---------------------------------|----------------------------------------------------------------|-----|-----|------------------|-----------------------------------------------------------------------|-------------------------------------------------------------------------|-------------------|

参, Ren Shen)12g,  
Semen Raphani(莱  
菔子, Lai Fu  
Zi)15g, Retinervus  
Luffae Fructus(丝瓜  
络, Si Gua Luo)15g,  
Retinervus Citri  
Fructus(橘络, Ju  
Luo)15, Fructus  
Perillae(苏子, Su  
Zi)12g, Bulbus  
Fritillariae  
Thunbergii(Bulbus  
Fritillariae  
Thunbergii(浙贝母,  
Zhe Bei Mu)母,Zhe  
Bei Mu)12g,  
Semen Armeniacae  
Amarum(杏仁,  
Xing Ren)12g,  
Radix  
Scutellariae(黄芩,  
Huang Qin)15g,  
Radix  
Glycyrrhizae(生甘  
草, Sheng Gan

Cao)10g  
 Radix  
 Pseudostellariae(太  
 子参, Tai Zi Shen),  
 Radix  
 Ophiopogonis(麦  
 冬, Mai Dong),  
 Fructus Schisandrae  
 Chinensis(五味子,  
 Wu Wei Zi), Radix  
 Astragali seu  
 Hedysari(生黄芪,  
 Sheng Huang Qi),  
 Rhizoma  
 Atractylodis  
 Macrocephalae(炒  
 白术, Chao Bai  
 Zhu), Pericarpium  
 Citri Reticulatae(陈  
 皮, Chen Pi), Radix  
 Angelicae  
 Sinensis(当归,  
 Dang Gui), Radix  
 Glehniae(北沙参,  
 Bei Sha Shen),  
 Semen Armeniacae

The prevention and  
 control of  
 COVID-19 in  
 Shanxi province  
 (Trial version 1)

Shengjiang  
 Powder and  
 Buzhongyiqi  
 Decoction

3/8

3/6

100.00/75.  
 00

Shengmai      Shengmai  
 Decoction:    Decoction  
 1,                : 1,  
 Buzhongyi    Buzhongy  
 qi                iqi  
 Decoction:    Decoction  
 1                : 1

127SX2

|     |                                                       |                                                                                                                                                                                                                                                                                                                                                                                    |                                                       |               |                                              |     |     |              |                                                  |                                                    |       |
|-----|-------------------------------------------------------|------------------------------------------------------------------------------------------------------------------------------------------------------------------------------------------------------------------------------------------------------------------------------------------------------------------------------------------------------------------------------------|-------------------------------------------------------|---------------|----------------------------------------------|-----|-----|--------------|--------------------------------------------------|----------------------------------------------------|-------|
| 128 | Shengjiang Powder and Modified Zhuye Shigao Decoction | <p>Amarum(杏仁, Xing Ren), Folium Eriobotryae(枇杷叶, Pi Pa Ye), Bulbus Lili(百合, Bai He), Radix Glycyrrhizae(甘草, Gan Cao) Adenophrae Radix(南沙参, Nanshashen), Radix Glehniae(北沙参, Bei Sha Shen)各 10g, Radix Ophiopogonis(麦冬, Mai Dong)15g, Radix Panacis Quinquefolii(西洋参, Xi Yang Shen)6g, Fructus Schisandrae Chinensis(五味子, Wu Wei Zi)6g, Gypsum Fibrosum(生石膏, Sheng Shi Gao)15g,</p> | Diagnosis and treatment of COVID-19 (Trial version 6) | Convalescence | Shengjiang Powder and Zhuye Shigao Decoction | 3/7 | 3/5 | 100.00/71.43 | Shengmai Decoction: 1, Zhuye Shigao Decoction: 1 | Shengmai Decoction : 1, Zhuye Shigao Decoction : 1 | 128 6 |
|-----|-------------------------------------------------------|------------------------------------------------------------------------------------------------------------------------------------------------------------------------------------------------------------------------------------------------------------------------------------------------------------------------------------------------------------------------------------|-------------------------------------------------------|---------------|----------------------------------------------|-----|-----|--------------|--------------------------------------------------|----------------------------------------------------|-------|



Lophatherum  
 gracile(淡竹叶, Dan  
 Zhu Ye)10g, Folium  
 Mori(桑叶, Sang  
 Ye)10g, Rhizoma  
 Phragmitis(芦根,  
 Lu Gen)15g, Radix  
 Salviae  
 Miltiorrhizae(丹参,  
 Dan Shen)15g,  
 Radix  
 Glycyrrhizae(生甘  
 草, Sheng Gan  
 Cao)6g  
 Radix  
 Codonopsis(党参,  
 Dang Shen) 15g,  
 Radix Astragali seu  
 Hedysari(黄芪,  
 Huang Qi) 30g,  
 Poria(茯苓, Fu  
 Ling) 15g, Rhizoma  
 Pinelliae(半夏, Ban  
 Xia)9g, Pericarpium  
 Citri Reticulatae(陈  
 皮, Chen Pi) 9g,

The prevention and  
 control of  
 COVID-19 in  
 Shanxi province  
 (Trial )

Convalesce  
 nce

Erchen  
 Decoction

6

3

50.00

1

1

|     |                        |                                                                                                                                                                                                                                                                                                                                                                                                                                                 |                                      |          |                          |   |   |       |   |     |
|-----|------------------------|-------------------------------------------------------------------------------------------------------------------------------------------------------------------------------------------------------------------------------------------------------------------------------------------------------------------------------------------------------------------------------------------------------------------------------------------------|--------------------------------------|----------|--------------------------|---|---|-------|---|-----|
| 130 | Yifei Jianpi<br>Recipe | Herba<br>Agastaches(藿香,<br>Huo Xiang) 9g,<br>Fructus Amomi<br>Villosi(砂仁, Sha<br>Ren) 6g<br>Radix Astragali seu<br>Hedysari(黄芪,<br>Huang Qi)15g<br>Radix<br>Codonopsis(党参,<br>Dang Shen)6g<br>Pericarpium Citri<br>Reticulatae(陈皮,<br>Chen Pi)9g Radix<br>Angelicae<br>Sinensis(当归,<br>Dang Gui)9g Radix<br>Bupleuri(柴胡, Chai<br>Hu)6g Radix<br>Platycodonis(桔梗,<br>Jie Geng)3g 麸<br>Rhizoma<br>Atractylodis<br>Macrocephalae(炒<br>白术, Chao Bai | Gansu Provincial<br>Health Committee | Recovery | Buzhongyiqi<br>Decoction | 8 | 7 | 87.50 | 1 | 1/2 |
|-----|------------------------|-------------------------------------------------------------------------------------------------------------------------------------------------------------------------------------------------------------------------------------------------------------------------------------------------------------------------------------------------------------------------------------------------------------------------------------------------|--------------------------------------|----------|--------------------------|---|---|-------|---|-----|

Suggested  
Prescription of  
professor  
DuJiang(Miao  
medicine  
expert)

Zhu)15g 炒 Radix  
Paeoniae Alba(白  
芍, Bai Shao)9g  
Fructus Amomi  
Villosi(砂仁, Sha  
Ren)3g 生 Fructus  
Hordei  
Germinatus(麦芽,  
Mai Ya)15g 炙  
Radix  
Glycyrrhizae(甘草,  
Gan Cao)6g  
Serissa serissoides  
(DC.)Druce (锐过  
买 (白马骨), Bai  
Ma Gu)15g, (窝嘎  
乃 (墨斗菜), Wo  
Ga Nai)10g,  
Typhonium  
giganteum Engl.(加  
格略(独角莲), Du  
Jiao Lian)10g,  
Polygonum  
perfoliatum L. (加  
欧万囊 (蛇倒退),  
She Dao Tui)15g,

Guizhou provincial  
administration of  
TCM

Prevention

Hyrtanandra hirta  
 (Bl.) Miq.(加嘎旅  
 (生扯拢), Sheng  
 Che Long)12g,  
 Polygala japonica  
 Houtt. (锐草连 (爪  
 子金), Zhua Zi  
 Jin)10g, Saxifraga  
 stolonifera Curt.(窝  
 比省(虎耳草), Hu  
 Er Cao)12g,  
 Centellaasiatica(L.)  
 Urban(窝比踪溜  
 (积雪草), Ji Xue  
 Cao)12g, (锐阿都  
 偏 (岩虹豆), Yan  
 Hong Dou)12g,  
 Mahonia  
 oiwakensis  
 Hayata(都阿能 (十  
 大功劳), Shi Da  
 Gong Lao)10g  
 Serissa foetida  
 Comm(白马骨, Bai  
 Ma Gu)15g,Herba  
 Echiptae(墨旱莲,

The prevention and  
 control of  
 COVID-19 in  
 Beijin(Version 2)

Critical  
 illness

Mo Han  
 Lian)10g,Dysosma  
 pleiantha(独角莲,  
 Du Jiao  
 Lian)10g,Polygonu  
 m perfoliatum L.(蛇  
 倒退, She Diao  
 Tui)15g,Lycopodiu  
 m serratum  
 Thunb(生扯拢,  
 Sheng Che  
 Long)12g, (瓜子金,  
 Zhua Zi  
 Jin)10g,saxifrage(  
 虎耳草, Hu Er  
 Cao)12g,Centalla  
 asiatica(积雪草, Ji  
 Xue Cao)12g, (岩虹  
 豆, Yan Hong  
 Dou)12g,Mahonia  
 fortunei(十大功劳,  
 Shi Da Gong  
 Lao)10g  
 RhizomaCyrtomiiF  
 ortunei(贯众, Guan  
 Zhong)9-12g,

The prevention and  
 control of  
 COVID-19 in  
 Prevention

Professor Peng  
Yu's Child  
Prevention  
Advice

Perilla frutescens (L.) Britt.(苏梗, Su Geng)12-15g,  
Semen Sojae Preparatum(淡豆豉, Dan Dou Chi)3-6g,  
Radix et Rhizoma Rhei(大黄, Da Huang)3-6g,  
Rhizoma Atractylodis(苍术, Cang Shu)6-9g  
Radix Isatidis(板蓝根, Ban Lan Gen)20g,  
Rhizoma Cyrtomii fortunei(贯众, Guan Zhong)15g, Herba Agastaches(藿香, Huo Xiang)10g,  
Herba Menthae Heplocalycis(薄荷, Bo He)10g, Flos Chrysanthemi(菊花, Ju Hua)15g, Herba Schizonepetae(荆

Gansu province  
(Trial)

Guizhou provincial  
administration of  
TCM

Prevention

|     |                                                               |                                                                                                                                                                                                                                                                                                                                         |                                                                                            |                         |
|-----|---------------------------------------------------------------|-----------------------------------------------------------------------------------------------------------------------------------------------------------------------------------------------------------------------------------------------------------------------------------------------------------------------------------------|--------------------------------------------------------------------------------------------|-------------------------|
| 135 | Prevention of early pregnancy (Within 3 months of conception) | 芥, Jing Jie)10g,<br>Radix Puerariae(葛根, Ge Gen)6g,<br>Rhizoma Phragmitis(芦根, Lu Gen)10g, Radix Glycyrrhizae(甘草, Gan Cao)6g<br>Rhizoma Atractylodis Macrocephalae(白术, Bai Zhu)9g,<br>Radix Scutellariae(黄芩, Huang Qin)9g,<br>Folium Perillae(紫苏叶, Zi Su Ye)3g,<br>Flos Lonicerae(金银花, Jin Yin Hua)6g, Radix Ophiopogonis(麦冬, Mai Dong)6g | The prevention and control of Winter and Spring Flu 2021 and COVID-19 in Shandong province | Prevention              |
| 136 |                                                               | Flos Lonicerae(金银花, Jin Yin Hua)3g, Rhizoma Phragmitis(芦根,                                                                                                                                                                                                                                                                              | The prevention and control of COVID-19 in Beijing (Version 2)                              | Prevention for children |

|     |                                                                                                                                                                                                                                                                                                                                                                                                                                                                         |                                                                                     |            |
|-----|-------------------------------------------------------------------------------------------------------------------------------------------------------------------------------------------------------------------------------------------------------------------------------------------------------------------------------------------------------------------------------------------------------------------------------------------------------------------------|-------------------------------------------------------------------------------------|------------|
| 137 | <p>Lu Gen)6g,<br/> Pericarpium Citri<br/> Reticulatae(陈皮,<br/> Chen Pi)2g<br/> Radix Astragali seu<br/> Hedysari(生黄芪,<br/> Sheng Huang<br/> Qi)9g, Radix<br/> Glehniae(北沙参,<br/> Bei Sha Shen)9g,<br/> Rhizoma<br/> Anemarrhenae(知<br/> 母, Zhi Fu)9g,<br/> Troliius<br/> chinensis(金莲花,<br/> Jin Lian Hua)5g,<br/> Fructus<br/> Forsythiae(连翘,<br/> Lian Qiao)9g,<br/> Rhizoma<br/> Atractylodis(苍术,<br/> Cang Shu)9g, Radix<br/> Platycodonis(桔梗,<br/> Jie Geng)6g</p> | <p>The prevention and<br/> control of<br/> COVID-19 in<br/> Beijing (Version 2)</p> | Prevention |
| 138 | <p>Troliius<br/> chinensis(金莲花,</p>                                                                                                                                                                                                                                                                                                                                                                                                                                     | <p>The prevention and<br/> control of</p>                                           | Prevention |



|     |                                                                                                                                                                                                                                                                                                                                                                                                                                                                 |                                                                              |            |  |
|-----|-----------------------------------------------------------------------------------------------------------------------------------------------------------------------------------------------------------------------------------------------------------------------------------------------------------------------------------------------------------------------------------------------------------------------------------------------------------------|------------------------------------------------------------------------------|------------|--|
|     | Jin Lian Hua)two<br>flower,Radix<br>Ophiopogonis(麦<br>冬, Mai Dong)five<br>grain,Canarium<br>album (Lour.)<br>Raeusch.(青果,Qing<br>Gu)two<br>grain(Smash),Flos<br>Chrysanthemi(白菊<br>花, Bai Ju Hua)two<br>flower<br>Herba<br>Agastaches(藿香,<br>Huo Xiang)15-30g,<br>Herba Eupatorii(佩<br>兰,Pei Lan)15-30g,<br>Borneolum<br>Syntheticum(冰片,<br>Bing Pian)6-9g,<br>Radix Angelicae<br>Dahuricae(白芷,<br>Bai Zhi)15-30g<br>Radix<br>Ophiopogonis(麦<br>冬, Mai Dong)3g, | COVID-19 in<br>Beijing (Version 2)                                           |            |  |
| 139 |                                                                                                                                                                                                                                                                                                                                                                                                                                                                 | The prevention and<br>control of<br>COVID-19 in<br>Gansu province<br>(Trial) | Prevention |  |
| 140 |                                                                                                                                                                                                                                                                                                                                                                                                                                                                 | The prevention and<br>control of<br>COVID-19 in                              | Prevention |  |

|     |                           |                                                                                                                                                                                                                                                 |                                        |
|-----|---------------------------|-------------------------------------------------------------------------------------------------------------------------------------------------------------------------------------------------------------------------------------------------|----------------------------------------|
|     |                           | Folium Mori(桑叶,<br>Sang Ye)3g, Flos<br>Chrysanthemi(菊花,<br>Ju Hua)3g,<br>Pericarpium Citri<br>Reticulatae(陈皮,<br>Chen Pi)2g, Radix<br>Astragali seu<br>Hedysari(黄芪,<br>Huang Qi)10g                                                             | Beijing (Version 2)                    |
| 141 | Baihe Jiufei<br>Decoction |                                                                                                                                                                                                                                                 | Frontline treatment<br>effect feedback |
|     |                           | Rhizoma et Radix<br>Notopterygii(羌活,<br>Qiang Huo),<br>Heracleum<br>hemsleyanum<br>Diels(独活, Du<br>Huo), Radix<br>Peucedani(前胡,<br>Qian Hu), Radix<br>Bupleuri(柴胡, Chai<br>Hu), Fructus<br>Aurantii(枳壳, Zhi<br>Qiao), Radix<br>Platycodonis(桔梗, |                                        |
| 142 | Wuwei Baidu<br>Decoction  |                                                                                                                                                                                                                                                 | Frontline treatment<br>effect feedback |

|     |                                         |                                                                                                                                                                                                                                                                                                                                                                 |                                                |                             |
|-----|-----------------------------------------|-----------------------------------------------------------------------------------------------------------------------------------------------------------------------------------------------------------------------------------------------------------------------------------------------------------------------------------------------------------------|------------------------------------------------|-----------------------------|
|     |                                         | Jie Geng), Radix<br>Glycyrrhizae(甘草,<br>Gan Cao), Radix<br>Ginseng(人参, Ren<br>Shen), Poria(茯苓,<br>Fu Ling), Rhizoma<br>Ligustici<br>Chuanxiong(川芎,<br>Chuan Qiong),<br>Radix et Rhizoma<br>Rhei(大黄, Da<br>Huang), Rhizoma<br>Atractylodis(苍术,<br>Cang Shu)<br>Radix Astragali seu<br>Hedysari(黄芪,<br>Huang Qi), Fructus<br>Ligustri Lucidi(女<br>贞子, Nv Zhen Zi) | Frontline treatment<br>effect feedback         |                             |
| 143 | Zhenqifuzheng<br>Granules               |                                                                                                                                                                                                                                                                                                                                                                 |                                                |                             |
|     | Chaihu<br>Daxiong                       |                                                                                                                                                                                                                                                                                                                                                                 | Development of<br>Hubei Provincial             | Early                       |
| 144 | Prescription<br>(Strong<br>Pneumonia I) |                                                                                                                                                                                                                                                                                                                                                                 | Hospital of<br>Traditional Chinese<br>Medicine | stage/Progr<br>essive stage |
| 145 | Cold antifebrile<br>Prescription        |                                                                                                                                                                                                                                                                                                                                                                 | Development of<br>Hubei Provincial             |                             |

|     |                                                                                                             |                                                                                                                                                                                                    |                                                                                      |     |                              |                                                                                                                                                                                                    |                                            |     |                           |
|-----|-------------------------------------------------------------------------------------------------------------|----------------------------------------------------------------------------------------------------------------------------------------------------------------------------------------------------|--------------------------------------------------------------------------------------|-----|------------------------------|----------------------------------------------------------------------------------------------------------------------------------------------------------------------------------------------------|--------------------------------------------|-----|---------------------------|
|     |                                                                                                             |                                                                                                                                                                                                    | Hospital of<br>Traditional Chinese<br>Medicine                                       |     |                              |                                                                                                                                                                                                    |                                            |     |                           |
| 146 | Xuanqing<br>Hehua<br>Prescription<br>(Modified on<br>the basis of<br>"cold<br>antifebrile<br>Prescription") |                                                                                                                                                                                                    | Development of<br>Hubei Provincial<br>Hospital of<br>Traditional Chinese<br>Medicine |     |                              |                                                                                                                                                                                                    |                                            |     |                           |
| 147 | Xuanfeibaidu<br>Granule                                                                                     |                                                                                                                                                                                                    | National Health<br>Commission of the<br>People's Republic<br>of China                |     |                              |                                                                                                                                                                                                    |                                            |     |                           |
| 148 | Xuanfeihuazhu<br>o Powder                                                                                   | Herba Ephedrae(麻<br>黄, Ma Huang)6 g,<br>Fructus<br>Forsythiae(连翘,<br>Lian Qiao)15g,<br>Radix Peucedani(前<br>胡, Qian Hu)9g,<br>Rhizoma<br>Pinelliae(半夏, Ban<br>Xia)12g, Rhizoma<br>Atractylodis(苍术, | Gansu Provincial<br>Health Committee                                                 | 148 | Xuanfeihua<br>zhuo<br>Powder | Herba Ephedrae(麻<br>黄, Ma Huang)6 g,<br>Fructus<br>Forsythiae(连翘,<br>Lian Qiao)15g,<br>Radix Peucedani(前<br>胡, Qian Hu)9g,<br>Rhizoma<br>Pinelliae(半夏, Ban<br>Xia)12g, Rhizoma<br>Atractylodis(苍术, | Gansu<br>Provincial<br>Health<br>Committee | 148 | Xuanfeihuazh<br>uo Powder |



|     |                                                                          |                                                                                                                                                                                                |                                                                                                                                               |            |     |                                                                                                                                                                                                |                                                                                                                                                                |         |            |     |                                                                             |  |
|-----|--------------------------------------------------------------------------|------------------------------------------------------------------------------------------------------------------------------------------------------------------------------------------------|-----------------------------------------------------------------------------------------------------------------------------------------------|------------|-----|------------------------------------------------------------------------------------------------------------------------------------------------------------------------------------------------|----------------------------------------------------------------------------------------------------------------------------------------------------------------|---------|------------|-----|-----------------------------------------------------------------------------|--|
|     |                                                                          | Eugenia jambos<br>L.(蒲桃, Pu Tao),<br>Flos Carthami(红<br>花, Hong Hua),<br>Calculus Bovis(牛<br>黄, Niu Huang),<br>Moschus(Moschus(<br>麝香, She<br>Xiang),She Xiang),<br>Cinnabaris(朱砂,<br>Zhu Sha) |                                                                                                                                               |            |     | Eugenia jambos<br>L.(蒲桃, Pu Tao),<br>Flos Carthami(红<br>花, Hong Hua),<br>Calculus Bovis(牛<br>黄, Niu Huang),<br>Moschus(Moschus(<br>麝香, She<br>Xiang),She Xiang),<br>Cinnabaris(朱砂,<br>Zhu Sha) |                                                                                                                                                                |         |            |     |                                                                             |  |
|     |                                                                          |                                                                                                                                                                                                | Neijiang city<br>hospital of<br>traditional Chinese<br>medicine<br>development,Produ<br>ced by Sichuan<br>tiande<br>pharmaceutical co.<br>LTD |            |     |                                                                                                                                                                                                | Neijiang<br>city<br>hospital of<br>traditional<br>Chinese<br>medicine<br>developme<br>nt,Produce<br>d by<br>Sichuan<br>tiande<br>pharmaceu<br>tical co.<br>LTD |         |            |     |                                                                             |  |
| 152 | Fuzheng Kegan<br>Granule (Based<br>on<br>"Qixiangyiqijie<br>du Granule") |                                                                                                                                                                                                |                                                                                                                                               |            | 152 | Fuzheng<br>Kegan<br>Granule<br>(Based on<br>"Qixiangyiq<br>ijiedu<br>Granule")                                                                                                                 |                                                                                                                                                                |         |            | 152 | Fuzheng<br>Kegan<br>Granule<br>(Based on<br>"Qixiangyiqiji<br>edu Granule") |  |
| 153 | Qixiangyiqijied                                                          | Radix Astragali seu                                                                                                                                                                            | Sichuan Academy                                                                                                                               | Prevention | 153 | Qixiangyiqi                                                                                                                                                                                    | Radix Astragali seu                                                                                                                                            | Sichuan | Prevention | 153 | Qixiangyiqijie                                                              |  |







|     |                                       |                                                                                                                                                                                                           |                                                                                                       |            |     |                                       |                                                                                                                                                                                                           |                                                                                                       |            |     |                                       |
|-----|---------------------------------------|-----------------------------------------------------------------------------------------------------------------------------------------------------------------------------------------------------------|-------------------------------------------------------------------------------------------------------|------------|-----|---------------------------------------|-----------------------------------------------------------------------------------------------------------------------------------------------------------------------------------------------------------|-------------------------------------------------------------------------------------------------------|------------|-----|---------------------------------------|
| 156 | Chuanshegan total flavone Capsule     | Rhizoma<br>Belamcandae(射干,She Gan),<br>Flavonoids extracts                                                                                                                                                | Technical guidelines for TCM prevention and control of COVID-19 in Sichuan province (Revised edition) | Prevention | 156 | Chuanshegan total flavone Capsule     | Rhizoma<br>Belamcandae(射干,She Gan),<br>Flavonoids extracts                                                                                                                                                | Technical guidelines for TCM prevention and control of COVID-19 in Sichuan province (Revised edition) | Prevention | 156 | Chuanshegan total flavone Capsule     |
| 157 | Cold sliced mulberry ginger (Capsule) | Folium Mori(桑叶, Sang Ye), Fructus Forsythiae(连翘, Lian Qiao), Flos Chrysanthemi(菊花, Ju Hua), 苦 Semen Armeniacae<br>Amarum(杏仁, Xing Ren), Folium Perillae(紫苏叶, Zi Su Ye), Rhizoma Zingiberis(干姜, Gan Jiang) | Technical guidelines for TCM prevention and control of COVID-19 in Sichuan province (Revised edition) | Prevention | 157 | Cold sliced mulberry ginger (Capsule) | Folium Mori(桑叶, Sang Ye), Fructus Forsythiae(连翘, Lian Qiao), Flos Chrysanthemi(菊花, Ju Hua), 苦 Semen Armeniacae<br>Amarum(杏仁, Xing Ren), Folium Perillae(紫苏叶, Zi Su Ye), Rhizoma Zingiberis(干姜, Gan Jiang) | Technical guidelines for TCM prevention and control of COVID-19 in Sichuan province (Revised edition) | Prevention | 157 | Cold sliced mulberry ginger (Capsule) |
| 158 | Antivirus Granule                     | Radix Isatidis(板蓝根, Ban Lan Gen),                                                                                                                                                                         | Technical guidelines for TCM                                                                          | Prevention | 158 | Antivirus Granule                     | Radix Isatidis(板蓝根, Ban Lan Gen),                                                                                                                                                                         | Technical guidelines                                                                                  | Prevention | 158 | Antivirus Granule                     |

**Bufei  
Decoction and  
Modified Sanzi  
Yangqin**

Caulis Lonicerae(忍冬藤, Ren Dong Teng), Radix Sophorae Tonkinensis(山豆根, Shan Dou Gen), Rhizoma Belamcandae(射干, She Gan), Herba Houttuyniae(鱼腥草, Yu Xing Cao), Rhizoma Paridis(重楼, Chong Lou), Rhizoma Cyrtomii Fortunei(贯众, Guan Zhong), Radix Angelicae Dahuricae(白芷, Bai Zhi), Herba Artemisiae Annuae(青蒿, Qing Hao)  
 Radix Astragali seu Hedysari(黄芪, Huang Qi)15g  
 Radix

**prevention and control of COVID-19 in Sichuan province (Revised edition)**

**Technical guidelines for TCM prevention and control of**

Convalescence

**Bufei  
Decoction and  
Modified**

Caulis Lonicerae(忍冬藤, Ren Dong Teng), Radix Sophorae Tonkinensis(山豆根, Shan Dou Gen), Rhizoma Belamcandae(射干, She Gan), Herba Houttuyniae(鱼腥草, Yu Xing Cao), Rhizoma Paridis(重楼, Chong Lou), Rhizoma Cyrtomii Fortunei(贯众, Guan Zhong), Radix Angelicae Dahuricae(白芷, Bai Zhi), Herba Artemisiae Annuae(青蒿, Qing Hao)  
 Radix Astragali seu Hedysari(黄芪, Huang Qi)15g  
 Radix

**for TCM prevention and control of COVID-19 in Sichuan province (Revised edition)**

**Technical guidelines for TCM prevention**

Convalescence

**Bufei  
Decoction and  
Modified  
Sanzi Yangqin**

|     |                           |                                                                                                                                                                                                                                                                                                                                                                  |                                                                                                        |                               |     |                         |                                                                                                                                                                                                                                                                                                                                                                  |                                                               |                                                                      |                               |     |                           |                                                           |
|-----|---------------------------|------------------------------------------------------------------------------------------------------------------------------------------------------------------------------------------------------------------------------------------------------------------------------------------------------------------------------------------------------------------|--------------------------------------------------------------------------------------------------------|-------------------------------|-----|-------------------------|------------------------------------------------------------------------------------------------------------------------------------------------------------------------------------------------------------------------------------------------------------------------------------------------------------------------------------------------------------------|---------------------------------------------------------------|----------------------------------------------------------------------|-------------------------------|-----|---------------------------|-----------------------------------------------------------|
|     | Decoction                 | Pseudostellariae(太子参, Tai Zi Shen)15g Fructus<br>Corni(山茱萸, Shan Zhu Yu)15g Fructus<br>Aurantii<br>Immaturus(枳实, Zhi Shi)10g Fructus<br>Perillae(苏子, Su Zi)10g Semen<br>sinapis(白芥子, Bai Jie Zi)10g Fructus<br>Schisandrae Chinensis(五味子, Wu Wei Zi)10g<br>Semen Persicae(桃仁, Tao Ren)10g<br>Flos Carthami(红花, Hong Hua)10g<br>Flos Lonicerae(金银花, Jin Yin Hua), | COVID-19 in Sichuan province (Revised edition)                                                         |                               |     |                         |                                                                                                                                                                                                                                                                                                                                                                  |                                                               |                                                                      |                               |     |                           |                                                           |
| 160 | Huanglian Jiedu Decoction | Radix Scutellariae(黄芩, Huang Qin), Fructus Forsythiae(连翘,                                                                                                                                                                                                                                                                                                        | Chinese academy of sciences Shanghai institute of medicine and wuhan institute of virus joint research | Early stage/Progressive stage | 160 | Sanzi Yangqin Decoction | Pseudostellariae(太子参, Tai Zi Shen)15g Fructus<br>Corni(山茱萸, Shan Zhu Yu)15g Fructus<br>Aurantii<br>Immaturus(枳实, Zhi Shi)10g Fructus<br>Perillae(苏子, Su Zi)10g Semen<br>sinapis(白芥子, Bai Jie Zi)10g Fructus<br>Schisandrae Chinensis(五味子, Wu Wei Zi)10g<br>Semen Persicae(桃仁, Tao Ren)10g<br>Flos Carthami(红花, Hong Hua)10g<br>Flos Lonicerae(金银花, Jin Yin Hua), | and control of COVID-19 in Sichuan province (Revised edition) | Chinese academy of sciences Shanghai institute of medicine and wuhan | Early stage/Progressive stage | 160 | Huanglian Jiedu Decoction | Radix Scutellariae(黄芩, Huang Qin), Fructus Forsythiae(连翘, |



|     |                                                     |                                                                                                                                                                                                                                                                                                                                                 |                                                                  |            |     |                                          |                                                                                                                                                                                                                                                                                                                                                 |                               |                                                                  |            |     |                                                     |                                                                                                                                                                                                                                                                                                                                                 |                                         |
|-----|-----------------------------------------------------|-------------------------------------------------------------------------------------------------------------------------------------------------------------------------------------------------------------------------------------------------------------------------------------------------------------------------------------------------|------------------------------------------------------------------|------------|-----|------------------------------------------|-------------------------------------------------------------------------------------------------------------------------------------------------------------------------------------------------------------------------------------------------------------------------------------------------------------------------------------------------|-------------------------------|------------------------------------------------------------------|------------|-----|-----------------------------------------------------|-------------------------------------------------------------------------------------------------------------------------------------------------------------------------------------------------------------------------------------------------------------------------------------------------------------------------------------------------|-----------------------------------------|
| 163 | Formula I for General population adults             | <p>Lonicerae(金银花, Jin Yin Hua)6g,<br/>Radix<br/>Ophiopogonis(麦冬, Mai Dong)6g,<br/>Pericarpium Citri Reticulatae(陈皮, Chen Pi)6g<br/>Radix<br/>Lithospermi(紫草, Zi Cao)10 克,<br/>Semen Phaseoli(赤小豆, Chi Xiao Dou)30 克, Vigna radiata (Linn.)<br/>Trollius chinensis(金莲花, Jin Lian Hua)30 克,<br/>Radix<br/>Glycyrrhizae(生甘草, Sheng Gan Cao)6 克</p> | The prevention and control of COVID-19 in Henan province (Trial) | Prevention | 163 | pregnant)                                | <p>Lonicerae(金银花, Jin Yin Hua)6g,<br/>Radix<br/>Ophiopogonis(麦冬, Mai Dong)6g,<br/>Pericarpium Citri Reticulatae(陈皮, Chen Pi)6g<br/>Radix<br/>Lithospermi(紫草, Zi Cao)10 克,<br/>Semen Phaseoli(赤小豆, Chi Xiao Dou)30 克, Vigna radiata (Linn.)<br/>Trollius chinensis(金莲花, Jin Lian Hua)30 克,<br/>Radix<br/>Glycyrrhizae(生甘草, Sheng Gan Cao)6 克</p> | COVID-19 in Shandong province | The prevention and control of COVID-19 in Henan province (Trial) | Prevention | 163 | Formula I for General population adults             | <p>Lonicerae(金银花, Jin Yin Hua)6g,<br/>Radix<br/>Ophiopogonis(麦冬, Mai Dong)6g,<br/>Pericarpium Citri Reticulatae(陈皮, Chen Pi)6g<br/>Radix<br/>Lithospermi(紫草, Zi Cao)10 克,<br/>Semen Phaseoli(赤小豆, Chi Xiao Dou)30 克, Vigna radiata (Linn.)<br/>Trollius chinensis(金莲花, Jin Lian Hua)30 克,<br/>Radix<br/>Glycyrrhizae(生甘草, Sheng Gan Cao)6 克</p> | Formula I for General population adults |
| 164 | Prescription I for prevention of Special population | <p>Herba<br/>Agastaches(藿香, Huo Xiang)3g,<br/>Pericarpium Citri</p>                                                                                                                                                                                                                                                                             | The prevention and control of COVID-19 in Henan province         | Prevention | 164 | Prescription I for prevention of Special | <p>Herba<br/>Agastaches(藿香, Huo Xiang)3g,<br/>Pericarpium Citri</p>                                                                                                                                                                                                                                                                             | The prevention and control of | The prevention and control of                                    | Prevention | 164 | Prescription I for prevention of Special population |                                                                                                                                                                                                                                                                                                                                                 |                                         |

|     |                                                                     |                                                                                                                                                                                                                                                                                                                                                                                                                  |         |                                                                  |            |     |                                                                     |            |                                                                                                                                                                                                                                                                                                                                                                                                                  |                                    |                                                                  |            |     |                                                                     |
|-----|---------------------------------------------------------------------|------------------------------------------------------------------------------------------------------------------------------------------------------------------------------------------------------------------------------------------------------------------------------------------------------------------------------------------------------------------------------------------------------------------|---------|------------------------------------------------------------------|------------|-----|---------------------------------------------------------------------|------------|------------------------------------------------------------------------------------------------------------------------------------------------------------------------------------------------------------------------------------------------------------------------------------------------------------------------------------------------------------------------------------------------------------------|------------------------------------|------------------------------------------------------------------|------------|-----|---------------------------------------------------------------------|
| 165 | Prescription III for prevention of Special constitution of children | Reticulatae(陈皮,Chen Pi)3g,<br>Folium Mori(桑叶, Sang Ye)3g,<br>Rhizoma Phragmitis(芦根, Lu Gen)2 克, Radix Platycodonis(桔梗, Jie Geng)3g, Radix Glycyrrhizae(甘草, Gan Cao)2g<br>Herba Agastaches(藿香, Huo Xiang)6g,<br>Semen Coicis(薏苡仁, Yi Yi Ren)12g,<br>Rhizoma Atractylodis(苍术, Cang Shu)3g,<br>Cortex Magnoliae Officinalis(厚朴, Hou Pu)3g, Flos Lonicerae(金银花, Jin Yin Hua)3g,<br>RhizomaCyrptomiiFortunei(贯众, Guan | (Trial) | The prevention and control of COVID-19 in Henan province (Trial) | Prevention | 165 | Prescription III for prevention of Special constitution of children | population | Reticulatae(陈皮,Chen Pi)3g,<br>Folium Mori(桑叶, Sang Ye)3g,<br>Rhizoma Phragmitis(芦根, Lu Gen)2 克, Radix Platycodonis(桔梗, Jie Geng)3g, Radix Glycyrrhizae(甘草, Gan Cao)2g<br>Herba Agastaches(藿香, Huo Xiang)6g,<br>Semen Coicis(薏苡仁, Yi Yi Ren)12g,<br>Rhizoma Atractylodis(苍术, Cang Shu)3g,<br>Cortex Magnoliae Officinalis(厚朴, Hou Pu)3g, Flos Lonicerae(金银花, Jin Yin Hua)3g,<br>RhizomaCyrptomiiFortunei(贯众, Guan | COVID-19 in Henan province (Trial) | The prevention and control of COVID-19 in Henan province (Trial) | Prevention | 165 | Prescription III for prevention of Special constitution of children |
|-----|---------------------------------------------------------------------|------------------------------------------------------------------------------------------------------------------------------------------------------------------------------------------------------------------------------------------------------------------------------------------------------------------------------------------------------------------------------------------------------------------|---------|------------------------------------------------------------------|------------|-----|---------------------------------------------------------------------|------------|------------------------------------------------------------------------------------------------------------------------------------------------------------------------------------------------------------------------------------------------------------------------------------------------------------------------------------------------------------------------------------------------------------------|------------------------------------|------------------------------------------------------------------|------------|-----|---------------------------------------------------------------------|

|     |                                                      |                                                                                                                                                                                                                                                                                   |                                                                  |            |     |                                                      |                                                                                                                                                                                                                                                                                   |                                                                  |            |     |                                                      |
|-----|------------------------------------------------------|-----------------------------------------------------------------------------------------------------------------------------------------------------------------------------------------------------------------------------------------------------------------------------------|------------------------------------------------------------------|------------|-----|------------------------------------------------------|-----------------------------------------------------------------------------------------------------------------------------------------------------------------------------------------------------------------------------------------------------------------------------------|------------------------------------------------------------------|------------|-----|------------------------------------------------------|
| 166 | Prevention for eucrasia children                     | Zhong)5g<br>Gypsum<br>Fibrosum(生石膏, Sheng Shi Gao)10克, Vigna radiata (Linn.) Trolius chinensis(金莲花, Jin Lian Hua)12克, Herba Taraxaci(蒲公英, Pu Gong Ying)6克, Lophatherum gracile(淡竹叶, Dan Zhu Ye)6克<br>Rhizoma Phragmitis(芦根, Lu Gen)3克, RhizomaCyrptomiiFortunei(贯众, Guan Zhong)3克 | The prevention and control of COVID-19 in Henan province (Trial) | Prevention | 166 | Prevention for eucrasia children                     | Zhong)5g<br>Gypsum<br>Fibrosum(生石膏, Sheng Shi Gao)10克, Vigna radiata (Linn.) Trolius chinensis(金莲花, Jin Lian Hua)12克, Herba Taraxaci(蒲公英, Pu Gong Ying)6克, Lophatherum gracile(淡竹叶, Dan Zhu Ye)6克<br>Rhizoma Phragmitis(芦根, Lu Gen)3克, RhizomaCyrptomiiFortunei(贯众, Guan Zhong)3克 | The prevention and control of COVID-19 in Henan province (Trial) | Prevention | 166 | Prevention for eucrasia children                     |
| 167 | Prescription IV for prevention of Special population | Radix Astragali seu Hedysari(生黄芪, Sheng Huang Qi)9克, Rhizoma Belamcandae(射干, She Gan)5克,                                                                                                                                                                                          | The prevention and control of COVID-19 in Henan province (Trial) | Prevention | 167 | Prescription IV for prevention of Special population | Radix Astragali seu Hedysari(生黄芪, Sheng Huang Qi)9克, Rhizoma Belamcandae(射干, She Gan)5克, Radix                                                                                                                                                                                    | The prevention and control of COVID-19 in Henan                  | Prevention | 167 | Prescription IV for prevention of Special population |

168

Prevention of diabetes

Radix Glehniae(北沙参, Bei Sha Shen)9 克, Flos Lonicerae(金银花, Jin Yin Hua)9 克, Rhizoma Atractylodis(苍术, Cang Shu)9 克, Herba Agastaches(藿香, Huo Xiang)6 克, RhizomaCyrptomiiFortunei(贯众, Guan Zhong)5 克, Flos Lonicerae(金银花, Jin Yin Hua)12g, Adenophora stricta Miq.(沙参, Sha Shen)10g, Radix Ophiopogonis(麦冬, Mai Dong)15g, Rhizoma Phragmitis(芦根, Lu Gen)15g, Semen Coicis(生薏苡仁,

The prevention and control of Winter and Spring Flu 2020 and COVID-19 in Shandong province

Prevention

168

Prevention of diabetes

Glehniae(北沙参, Bei Sha Shen)9 克, Flos Lonicerae(金银花, Jin Yin Hua)9 克, Rhizoma Atractylodis(苍术, Cang Shu)9 克, Herba Agastaches(藿香, Huo Xiang)6 克, RhizomaCyrtomiiFortunei(贯众, Guan Zhong)5 克, Flos Lonicerae(金银花, Jin Yin Hua)12g, Adenophora stricta Miq.(沙参, Sha Shen)10g, Radix Ophiopogonis(麦冬, Mai Dong)15g, Rhizoma Phragmitis(芦根, Lu Gen)15g, Semen Coicis(生薏苡仁,

province (Trial)

The prevention and control of Winter and Spring Flu 2020 and COVID-19 in Shandong province

Prevention

168

Prevention of diabetes





|     |                                                       |                                                                                                                                                                                                                                                                                                                                                                                                             |                                                                  |            |     |                                                       |                                                                                                                                                                                                                                                                                                                                                                                                          |                                                                                            |            |     |                                                 |                                                                                                                                                                                                                                                                                                                                                                                                          |                                                                       |            |     |                                                 |
|-----|-------------------------------------------------------|-------------------------------------------------------------------------------------------------------------------------------------------------------------------------------------------------------------------------------------------------------------------------------------------------------------------------------------------------------------------------------------------------------------|------------------------------------------------------------------|------------|-----|-------------------------------------------------------|----------------------------------------------------------------------------------------------------------------------------------------------------------------------------------------------------------------------------------------------------------------------------------------------------------------------------------------------------------------------------------------------------------|--------------------------------------------------------------------------------------------|------------|-----|-------------------------------------------------|----------------------------------------------------------------------------------------------------------------------------------------------------------------------------------------------------------------------------------------------------------------------------------------------------------------------------------------------------------------------------------------------------------|-----------------------------------------------------------------------|------------|-----|-------------------------------------------------|
| 171 | Prescription III for prevention of Special population | Hedysari(黄芪, Huang Qi)10 克<br>Radix<br>Ophiopogonis(麦冬, Mai Dong)5,<br>Flos<br>Chrysanthemi(菊花, Ju Hua)2, Rhizoma<br>Belamcandae(射干, She Gan)2g, Folium<br>Mori(桑叶, Sang Ye)2g, Canarium album (Lour.)<br>Raeusch.(青果, Qing Gu)2g,<br>RhizomaCyrptomiiF<br>ortunei(贯众, Guan Zhong)2g<br>Flos Lonicerae(金银花, Jin Yin Hua)6g, Herba<br>Taraxaci(蒲公英, Pu Gong Ying)3g,<br>Radix<br>Glycyrrhizae(生甘草, Sheng Gan | The prevention and control of COVID-19 in Henan province (Trial) | Prevention | 171 | Prescription III for prevention of Special population | Hedysari(黄芪, Huang Qi)10 克<br>Radix<br>Ophiopogonis(麦冬, Mai Dong)5, Flos<br>Chrysanthemi(菊花, Ju Hua)2, Rhizoma<br>Belamcandae(射干, She Gan)2g, Folium<br>Mori(桑叶, Sang Ye)2g, Canarium album (Lour.)<br>Raeusch.(青果, Qing Gu)2g,<br>RhizomaCyrptomiiF<br>ortunei(贯众, Guan Zhong)2g<br>Flos Lonicerae(金银花, Jin Yin Hua)6g, Herba<br>Taraxaci(蒲公英, Pu Gong Ying)3g,<br>Radix<br>Glycyrrhizae(生甘草, Sheng Gan | The prevention and control of Winter and Spring Flu 2020 and COVID-19 in Shandong province | Prevention | 172 | Prevention for children (Jiedu Fanggan Formula) | Hedysari(黄芪, Huang Qi)10 克<br>Radix<br>Ophiopogonis(麦冬, Mai Dong)5, Flos<br>Chrysanthemi(菊花, Ju Hua)2, Rhizoma<br>Belamcandae(射干, She Gan)2g, Folium<br>Mori(桑叶, Sang Ye)2g, Canarium album (Lour.)<br>Raeusch.(青果, Qing Gu)2g,<br>RhizomaCyrptomiiF<br>ortunei(贯众, Guan Zhong)2g<br>Flos Lonicerae(金银花, Jin Yin Hua)6g, Herba<br>Taraxaci(蒲公英, Pu Gong Ying)3g,<br>Radix<br>Glycyrrhizae(生甘草, Sheng Gan | The prevention and control of Winter and Spring Flu 2020 and COVID-19 | Prevention | 172 | Prevention for children (Jiedu Fanggan Formula) |
|-----|-------------------------------------------------------|-------------------------------------------------------------------------------------------------------------------------------------------------------------------------------------------------------------------------------------------------------------------------------------------------------------------------------------------------------------------------------------------------------------|------------------------------------------------------------------|------------|-----|-------------------------------------------------------|----------------------------------------------------------------------------------------------------------------------------------------------------------------------------------------------------------------------------------------------------------------------------------------------------------------------------------------------------------------------------------------------------------|--------------------------------------------------------------------------------------------|------------|-----|-------------------------------------------------|----------------------------------------------------------------------------------------------------------------------------------------------------------------------------------------------------------------------------------------------------------------------------------------------------------------------------------------------------------------------------------------------------------|-----------------------------------------------------------------------|------------|-----|-------------------------------------------------|

|     |                                                                          |                                                                                                                                                                        |                                                                                            |            |     |                                                                          |                                                                                                                                                                        |                                                                                                                 |            |     |                                                                          |
|-----|--------------------------------------------------------------------------|------------------------------------------------------------------------------------------------------------------------------------------------------------------------|--------------------------------------------------------------------------------------------|------------|-----|--------------------------------------------------------------------------|------------------------------------------------------------------------------------------------------------------------------------------------------------------------|-----------------------------------------------------------------------------------------------------------------|------------|-----|--------------------------------------------------------------------------|
| 173 | Prevention for children (Prevention of Fuzheng)                          | Cao)1.5g<br><br>Radix Astragali seu Hedysari(生黄芪, Sheng Huang Qi)6g, Radix Scutellariae(黄芩, Huang Qin)3g, Radix Glycyrrhizae(甘草, Gan Cao)1.5g                          | The prevention and control of Winter and Spring Flu 2020 and COVID-19 in Shandong province | Prevention | 173 | Prevention for children (Prevention of Fuzheng)                          | Cao)1.5g<br><br>Radix Astragali seu Hedysari(生黄芪, Sheng Huang Qi)6g, Radix Scutellariae(黄芩, Huang Qin)3g, Radix Glycyrrhizae(甘草, Gan Cao)1.5g                          | in Shandong province The prevention and control of Winter and Spring Flu 2020 and COVID-19 in Shandong province | Prevention | 173 | Prevention for children (Prevention of Fuzheng)                          |
| 174 | Suggested Prescription of professor Liu Shangyi(Chinese Medicine Master) | Radix Glehniae(北沙参, Bei Sha Shen)10g, Rhizoma Polygonati Odorati(玉竹, Yu Zhu)20g, Herba Dendrobii(石斛, Shi Hu)20g, Rhizoma Cyrtomii Fortunei(贯众, Guan Zhong)20g, Rhizoma | Prevention of "COVID-19" Chinese medicine Prescription, ethnic medicine Prescription       | Prevention | 174 | Suggested Prescription of professor Liu Shangyi(Chinese Medicine Master) | Radix Glehniae(北沙参, Bei Sha Shen)10g, Rhizoma Polygonati Odorati(玉竹, Yu Zhu)20g, Herba Dendrobii(石斛, Shi Hu)20g, Rhizoma Cyrtomii Fortunei(贯众, Guan Zhong)20g, Rhizoma | Suggested Prescription of "COVID-19" Chinese medicine Prescription, ethnic medicine Prescription                | Prevention | 174 | Suggested Prescription of professor Liu Shangyi(Chinese Medicine Master) |

|     |                            |                                                                                                                                                                                                                                                                                                                                                                    |                                                                                            |            |     |                            |                                                                                                                                                                                                                                                                                                                                                                    |                                                                      |                  |     |                |                                                                |                  |     |                |
|-----|----------------------------|--------------------------------------------------------------------------------------------------------------------------------------------------------------------------------------------------------------------------------------------------------------------------------------------------------------------------------------------------------------------|--------------------------------------------------------------------------------------------|------------|-----|----------------------------|--------------------------------------------------------------------------------------------------------------------------------------------------------------------------------------------------------------------------------------------------------------------------------------------------------------------------------------------------------------------|----------------------------------------------------------------------|------------------|-----|----------------|----------------------------------------------------------------|------------------|-----|----------------|
| 175 | Prevention of hypertension | Atractylodis(苍术, Cang Shu)10g, Rhizoma Acori Tatarinowii(石菖蒲, Shi Chang Pu)10g Flos Chrysanthemi(菊花, Ju Hua)15g, Ramulus Uncariae Cum Uncis(钩藤, Gou Teng)12g, Radix Paeoniae Alba(白芍, Bai Shao)9g, Lycium barbarumL.(枸杞, Gou Qi)10g, Poria(茯苓, Fu Ling)9g Styrax(苏合香, Su He Xiang)50g , Benzoinum(安息香, An Xi Xiang)100g, Borneolum Syntheticum(冰片, Bing Pian)50g , | The prevention and control of Winter and Spring Flu 2020 and COVID-19 in Shandong province | Prevention | 175 | Prevention of hypertension | Atractylodis(苍术, Cang Shu)10g, Rhizoma Acori Tatarinowii(石菖蒲, Shi Chang Pu)10g Flos Chrysanthemi(菊花, Ju Hua)15g, Ramulus Uncariae Cum Uncis(钩藤, Gou Teng)12g, Radix Paeoniae Alba(白芍, Bai Shao)9g, Lycium barbarumL.(枸杞, Gou Qi)10g, Poria(茯苓, Fu Ling)9g Styrax(苏合香, Su He Xiang)50g , Benzoinum(安息香, An Xi Xiang)100g, Borneolum Syntheticum(冰片, Bing Pian)50g , | 1, The prevention and control of COVID-19 in Shanxi province (Trial) | Critical illness | 176 | Suhexiang Pill | 1, The prevention and control of COVID-19 in Shanxi province   | Critical illness | 176 | Suhexiang Pill |
| 175 | Prevention of hypertension | Atractylodis(苍术, Cang Shu)10g, Rhizoma Acori Tatarinowii(石菖蒲, Shi Chang Pu)10g Flos Chrysanthemi(菊花, Ju Hua)15g, Ramulus Uncariae Cum Uncis(钩藤, Gou Teng)12g, Radix Paeoniae Alba(白芍, Bai Shao)9g, Lycium barbarumL.(枸杞, Gou Qi)10g, Poria(茯苓, Fu Ling)9g Styrax(苏合香, Su He Xiang)50g , Benzoinum(安息香, An Xi Xiang)100g, Borneolum Syntheticum(冰片, Bing Pian)50g , | The prevention and control of Winter and Spring Flu 2020 and COVID-19 in Shandong province | Prevention | 175 | Prevention of hypertension | Atractylodis(苍术, Cang Shu)10g, Rhizoma Acori Tatarinowii(石菖蒲, Shi Chang Pu)10g Flos Chrysanthemi(菊花, Ju Hua)15g, Ramulus Uncariae Cum Uncis(钩藤, Gou Teng)12g, Radix Paeoniae Alba(白芍, Bai Shao)9g, Lycium barbarumL.(枸杞, Gou Qi)10g, Poria(茯苓, Fu Ling)9g Styrax(苏合香, Su He Xiang)50g , Benzoinum(安息香, An Xi Xiang)100g, Borneolum Syntheticum(冰片, Bing Pian)50g , | 1, The prevention and control of COVID-19 in Shandong province       | Critical illness | 176 | Suhexiang Pill | 1, The prevention and control of COVID-19 in Shandong province | Critical illness | 176 | Suhexiang Pill |

Cornu Bubali(水牛角, Shui Niu Jiao)Concentrated Powder200g ,  
Moschus(麝香, She Xiang)75g,  
Lignum Santali Albi(檀香,Tan Xiang)100g ,  
Lignum Aquilariae Resinatum(沉香, chenxiang)100g ,  
Flos Caryophylli(丁香, Ding Xiang)100g,  
Rhizoma Cyperi(香附, Xiang Fu)100g ,  
Radix Aucklandiae(木香, Mu Xiang)100g,  
Olibanum (乳香, Ru Xiang)(制)100g,  
Fructus Piperis Longi(荜茇, Bi Ba)100g,  
Rhizoma

2, Diagnosis and treatment of COVID-19(Trial version 4)

Cornu Bubali(水牛角, Shui Niu Jiao)Concentrated Powder200g ,  
Moschus(麝香, She Xiang)75g,  
Lignum Santali Albi(檀香,Tan Xiang)100g ,  
Lignum Aquilariae Resinatum(沉香, chenxiang)100g ,  
Flos Caryophylli(丁香, Ding Xiang)100g,  
Rhizoma Cyperi(香附, Xiang Fu)100g ,  
Radix Aucklandiae(木香, Mu Xiang)100g,  
Olibanum (乳香, Ru Xiang)(制)100g,  
Fructus Piperis Longi(荜茇, Bi Ba)100g,  
Rhizoma

(Trial)  
2,  
Diagnosis and treatment of COVID-19 (Trial version 4)

|     |                           |                                                                                                                                                                                                                                                                                                                                                                                                                                                                                                   |                                                                               |                     |     |                              |                                                                                                                                                                                                                                                                                                                                                                                                                                                                                                   |                                                                                        |                     |     |                           |
|-----|---------------------------|---------------------------------------------------------------------------------------------------------------------------------------------------------------------------------------------------------------------------------------------------------------------------------------------------------------------------------------------------------------------------------------------------------------------------------------------------------------------------------------------------|-------------------------------------------------------------------------------|---------------------|-----|------------------------------|---------------------------------------------------------------------------------------------------------------------------------------------------------------------------------------------------------------------------------------------------------------------------------------------------------------------------------------------------------------------------------------------------------------------------------------------------------------------------------------------------|----------------------------------------------------------------------------------------|---------------------|-----|---------------------------|
| 177 | Shexiang<br>Niuhuang Pill | <p>Atractylodis<br/>Macrocephalae(白<br/>术, Bai Zhu)100g,<br/>Fructus<br/>Chebulae(诃子肉,<br/>He Zi Rou)100g,<br/>Cinnabaris(朱砂,<br/>Zhu Sha)100g<br/>Calculus Bovis(牛<br/>黄, Niu Huang)3g,<br/>Moschus(麝香, She<br/>Xiang)1.5g, Radix<br/>Saposhnikoviae(防<br/>风, Fang Feng)9g,<br/>Radix Paeoniae<br/>Rubra(赤芍, Chi<br/>Shao)15g,<br/>Rhizoma<br/>Coptidis(黄连,<br/>Huang Lian)15g,<br/>Radix et Rhizoma<br/>Rhei(大黄, Da<br/>Huang)30g,<br/>Ramulus Uncariae<br/>Cum Uncis(钩藤,<br/>Gou Teng)15g,</p> | The prevention and<br>control of<br>COVID-19 in<br>Shanxi province<br>(Trial) | Critical<br>illness | 177 | Shexiang<br>Niuhuang<br>Pill | <p>Atractylodis<br/>Macrocephalae(白<br/>术, Bai Zhu)100g,<br/>Fructus<br/>Chebulae(诃子肉,<br/>He Zi Rou)100g,<br/>Cinnabaris(朱砂,<br/>Zhu Sha)100g<br/>Calculus Bovis(牛<br/>黄, Niu Huang)3g,<br/>Moschus(麝香, She<br/>Xiang)1.5g, Radix<br/>Saposhnikoviae(防<br/>风, Fang Feng)9g,<br/>Radix Paeoniae<br/>Rubra(赤芍, Chi<br/>Shao)15g,<br/>Rhizoma<br/>Coptidis(黄连,<br/>Huang Lian)15g,<br/>Radix et Rhizoma<br/>Rhei(大黄, Da<br/>Huang)30g,<br/>Ramulus Uncariae<br/>Cum Uncis(钩藤,<br/>Gou Teng)15g,</p> | The<br>prevention<br>and control<br>of<br>COVID-19<br>in Shanxi<br>province<br>(Trial) | Critical<br>illness | 177 | Shexiang<br>Niuhuang Pill |
|-----|---------------------------|---------------------------------------------------------------------------------------------------------------------------------------------------------------------------------------------------------------------------------------------------------------------------------------------------------------------------------------------------------------------------------------------------------------------------------------------------------------------------------------------------|-------------------------------------------------------------------------------|---------------------|-----|------------------------------|---------------------------------------------------------------------------------------------------------------------------------------------------------------------------------------------------------------------------------------------------------------------------------------------------------------------------------------------------------------------------------------------------------------------------------------------------------------------------------------------------|----------------------------------------------------------------------------------------|---------------------|-----|---------------------------|

Fructus

Forsythiae(连翘,

Lian Qiao)30g,

Cortex

Phellodendri(黄柏,

Huang Bo)15g,

Gardenia

jasminoides Ellis(梔

子, Zhi Zi)15g, Flos

Lonicerae(金银花,

Jin Yin Hua)30g,

Radix

Ophiopogonis(麦

冬, Mai Dong)9g,

Radix

Platycodonis(桔梗,

Jie Geng)12g,

Radix Angelicae

Sinensis(当归,

Dang Gui)15g,

Radix

Scutellariae(黄芩,

Huang Qin)15g,

Radix

Glycyrrhizae(甘草,

Gan Cao)9g,

Fructus

Forsythiae(连翘,

Lian Qiao)30g,

Cortex

Phellodendri(黄柏,

Huang Bo)15g,

Gardenia

jasminoides Ellis(梔

子, Zhi Zi)15g, Flos

Lonicerae(金银花,

Jin Yin Hua)30g,

Radix

Ophiopogonis(麦冬,

Mai Dong)9g,

Radix

Platycodonis(桔梗,

Jie Geng)12g,

Radix Angelicae

Sinensis(当归,

Dang Gui)15g,

Radix

Scutellariae(黄芩,

Huang Qin)15g,

Radix

Glycyrrhizae(甘草,

Gan Cao)9g,

|     |                                 |                                                                                                                                                                                                                                                                                                                                                                                                                                                                                      |                                                                                                                                              |                                |     |                                 |                                                                                                                                                                                                                                                                                                                                                                                                                                                                                      |                                                                                                                    |                                |     |                                 |
|-----|---------------------------------|--------------------------------------------------------------------------------------------------------------------------------------------------------------------------------------------------------------------------------------------------------------------------------------------------------------------------------------------------------------------------------------------------------------------------------------------------------------------------------------|----------------------------------------------------------------------------------------------------------------------------------------------|--------------------------------|-----|---------------------------------|--------------------------------------------------------------------------------------------------------------------------------------------------------------------------------------------------------------------------------------------------------------------------------------------------------------------------------------------------------------------------------------------------------------------------------------------------------------------------------------|--------------------------------------------------------------------------------------------------------------------|--------------------------------|-----|---------------------------------|
| 178 | Shufeng Jiedu Capsule (Granule) | <p>Gypsum<br/>Fibrosium(石膏, Shi Gao)30g,<br/>Realgar(雄黄,<br/>Xiong Huang)15g,<br/>Cinnabaris(朱砂,<br/>Zhu Sha)30g,<br/>Borneolum<br/>Syntheticum(冰片,<br/>Bing Pian)15g,<br/>Herba Menthae<br/>Heplocalycis(薄荷,<br/>Bo He)3g<br/>Rhizoma Polygoni<br/>Cuspidati(虎杖, Hu Zhang), Fructus<br/>Forsythiae(连翘,<br/>Lian Qiao), Radix<br/>Isatidis(板蓝根,<br/>Ban Lan Gen),<br/>Radix Bupleuri(柴胡, Chai Hu), Herba<br/>Patriniae (败酱草,<br/>Bai Jiang Cao),<br/>Herba Verbenae(马鞭草, Ma Bian</p> | <p>1, The prevention and control of COVID-19 in Shanxi province (Trial)<br/><br/>2, Diagnosis and treatment of COVID-19(Trial version 6)</p> | <p>Prevention /Early stage</p> | 178 | Shufeng Jiedu Capsule (Granule) | <p>Gypsum<br/>Fibrosium(石膏, Shi Gao)30g,<br/>Realgar(雄黄,<br/>Xiong Huang)15g,<br/>Cinnabaris(朱砂,<br/>Zhu Sha)30g,<br/>Borneolum<br/>Syntheticum(冰片,<br/>Bing Pian)15g,<br/>Herba Menthae<br/>Heplocalycis(薄荷,<br/>Bo He)3g<br/>Rhizoma Polygoni<br/>Cuspidati(虎杖, Hu Zhang), Fructus<br/>Forsythiae(连翘,<br/>Lian Qiao), Radix<br/>Isatidis(板蓝根,<br/>Ban Lan Gen),<br/>Radix Bupleuri(柴胡, Chai Hu), Herba<br/>Patriniae (败酱草,<br/>Bai Jiang Cao),<br/>Herba Verbenae(马鞭草, Ma Bian</p> | <p>1, The prevention and control of COVID-19 in Shanxi province (Trial)<br/><br/>2, Diagnosis and treatment of</p> | <p>Prevention /Early stage</p> | 178 | Shufeng Jiedu Capsule (Granule) |
|-----|---------------------------------|--------------------------------------------------------------------------------------------------------------------------------------------------------------------------------------------------------------------------------------------------------------------------------------------------------------------------------------------------------------------------------------------------------------------------------------------------------------------------------------|----------------------------------------------------------------------------------------------------------------------------------------------|--------------------------------|-----|---------------------------------|--------------------------------------------------------------------------------------------------------------------------------------------------------------------------------------------------------------------------------------------------------------------------------------------------------------------------------------------------------------------------------------------------------------------------------------------------------------------------------------|--------------------------------------------------------------------------------------------------------------------|--------------------------------|-----|---------------------------------|



|     |                        |                                                                                                                                                                                                                                                                                                                                                                                                |                                                                                                                   |                               |     |                        |                                                                                                                                                                                                                                                                                                                                                                                                |                                                                                    |                               |     |                        |
|-----|------------------------|------------------------------------------------------------------------------------------------------------------------------------------------------------------------------------------------------------------------------------------------------------------------------------------------------------------------------------------------------------------------------------------------|-------------------------------------------------------------------------------------------------------------------|-------------------------------|-----|------------------------|------------------------------------------------------------------------------------------------------------------------------------------------------------------------------------------------------------------------------------------------------------------------------------------------------------------------------------------------------------------------------------------------|------------------------------------------------------------------------------------|-------------------------------|-----|------------------------|
| 179 | Xingnaojing Injection  | Cao), Rhizoma Phragmitis(芦根, Lu Gen), Radix Glycyrrhizae(甘草, Gan Cao) Moschus(麝香, She Xiang), Radix Curcumae(郁金, Yu Jin), Borneolum Syntheticum(冰片, Bing Pian), Gardenia jasminoides Ellis(梔子, Zhi Zi). The auxiliary materials are polysorbate 80 and sodium chloride Herba Taraxaci(蒲公英, Pu Gong Ying), Radix Scutellariae(黄芩, Huang Qin), Corydalis Bungeanae Herba(苦地丁, Ku Di Ding), Radix | Diagnosis and treatment of COVID-19(Trial version 6/7)                                                            | Critical illness              | 179 | Xingnaojing Injection  | Cao), Rhizoma Phragmitis(芦根, Lu Gen), Radix Glycyrrhizae(甘草, Gan Cao) Moschus(麝香, She Xiang), Radix Curcumae(郁金, Yu Jin), Borneolum Syntheticum(冰片, Bing Pian), Gardenia jasminoides Ellis(梔子, Zhi Zi). The auxiliary materials are polysorbate 80 and sodium chloride Herba Taraxaci(蒲公英, Pu Gong Ying), Radix Scutellariae(黄芩, Huang Qin), Corydalis Bungeanae Herba(苦地丁, Ku Di Ding), Radix | COVID-19 (Trial version 6) Diagnosis and treatment of COVID-19 (Trial version 6/7) | Critical illness              | 179 | Xingnaojing Injection  |
| 180 | Pudilan Xiaoyan Tablet | Corydalis Bungeanae Herba(苦地丁, Ku Di Ding), Radix                                                                                                                                                                                                                                                                                                                                              | The prevention and control of COVID-19 in Hainan province (The public version of the second edition of the trial) | Early stage/Progressive stage | 180 | Pudilan Xiaoyan Tablet | Corydalis Bungeanae Herba(苦地丁, Ku Di Ding), Radix                                                                                                                                                                                                                                                                                                                                              | The prevention and control of COVID-19 in Hainan province (The public              | Early stage/Progressive stage | 180 | Pudilan Xiaoyan Tablet |

|     |                            |                                                                                                                                                                                                                                                                                                                                                                                                                                                   |                                                                                                                                     |                                      |     |                            |                                                                                                                                                                                                                                                                                                                                                                                                                                                   |                                                                                                                                                                                                                                                                                                                |                                                                                              |     |                            |
|-----|----------------------------|---------------------------------------------------------------------------------------------------------------------------------------------------------------------------------------------------------------------------------------------------------------------------------------------------------------------------------------------------------------------------------------------------------------------------------------------------|-------------------------------------------------------------------------------------------------------------------------------------|--------------------------------------|-----|----------------------------|---------------------------------------------------------------------------------------------------------------------------------------------------------------------------------------------------------------------------------------------------------------------------------------------------------------------------------------------------------------------------------------------------------------------------------------------------|----------------------------------------------------------------------------------------------------------------------------------------------------------------------------------------------------------------------------------------------------------------------------------------------------------------|----------------------------------------------------------------------------------------------|-----|----------------------------|
| 181 | Qingkailing<br>Oral Liquid | Isatidis(板蓝根,<br>Ban Lan Gen)<br><br>Cholic acid, Concha<br>Margaritifera(珍珠<br>母, Zhen Zhu Mu),<br>hyodeoxycholic<br>acid, Gardenia<br>jasminoides Ellis(梔<br>子, Zhi Zi), Cornu<br>Bubali(水牛角,<br>Shui Niu Jiao),<br>Radix Isatidis(板蓝<br>根, Ban Lan Gen),<br>Baicalin , Flos<br>Lonicerae(金银花,<br>Jin Yin Hua)<br>Cortex<br>Eucommiae(杜仲,<br>Du Zhong)30-45g,<br>Radix Dipsaci(川<br>断, Chuan<br>Duan)30-45g, Radix<br>Angelicae<br>Sinensis(当归, | The prevention and<br>control of<br>COVID-19 in<br>Hainan province<br>(The public version<br>of the second<br>edition of the trial) | Early<br>stage/Progr<br>essive stage | 181 | Qingkailing<br>Oral Liquid | Isatidis(板蓝根,<br>Ban Lan Gen)<br><br>Cholic acid, Concha<br>Margaritifera(珍珠<br>母, Zhen Zhu Mu),<br>hyodeoxycholic<br>acid, Gardenia<br>jasminoides Ellis(梔<br>子, Zhi Zi), Cornu<br>Bubali(水牛角,<br>Shui Niu Jiao),<br>Radix Isatidis(板蓝<br>根, Ban Lan Gen),<br>Baicalin , Flos<br>Lonicerae(金银花,<br>Jin Yin Hua)<br>Cortex<br>Eucommiae(杜仲,<br>Du Zhong)30-45g,<br>Radix Dipsaci(川<br>断, Chuan<br>Duan)30-45g, Radix<br>Angelicae<br>Sinensis(当归, | version of<br>the second<br>edition of<br>the trial)<br><br>The<br>prevention<br>and control<br>of<br>COVID-19<br>in Hainan<br>province<br>(The<br>public<br>version of<br>the second<br>edition of<br>the trial)<br><br>The<br>prevention<br>and control<br>of<br>COVID-19<br>in Gansu<br>province<br>(Trial) | Early<br>stage/Progr<br>essive<br>stage<br><br>Prevention<br>(Foot-bath<br>ing<br>Decoction) | 181 | Qingkailing<br>Oral Liquid |
| 182 |                            |                                                                                                                                                                                                                                                                                                                                                                                                                                                   |                                                                                                                                     |                                      | 182 |                            |                                                                                                                                                                                                                                                                                                                                                                                                                                                   |                                                                                                                                                                                                                                                                                                                |                                                                                              | 182 |                            |

|     |                     |                                                                                                                                                                                       |                                                                  |                                                                              |     |                     |                                                                                                                                                                                       |                                                                              |                                                                              |     |                     |
|-----|---------------------|---------------------------------------------------------------------------------------------------------------------------------------------------------------------------------------|------------------------------------------------------------------|------------------------------------------------------------------------------|-----|---------------------|---------------------------------------------------------------------------------------------------------------------------------------------------------------------------------------|------------------------------------------------------------------------------|------------------------------------------------------------------------------|-----|---------------------|
| 183 | Xiyanping Injection | Dang Gui)15-20g,<br>Radix Astragali seu<br>Hedysari(黄芪,<br>Huang Qi)30-45g,<br>Herba<br>Agastaches(藿香,<br>Huo Xiang)15-30g,<br>Rhizoma Zingiberis<br>Recens(生姜, Sheng<br>Jiang)15-20g | Diagnosis and<br>treatment of<br>COVID-19 (Trial<br>version 6/7) | Critical<br>illness<br>(Chinese<br>patent<br>medicine is<br>recommen<br>ded) | 183 | Xiyanping Injection | Dang Gui)15-20g,<br>Radix Astragali seu<br>Hedysari(黄芪,<br>Huang Qi)30-45g,<br>Herba<br>Agastaches(藿香,<br>Huo Xiang)15-30g,<br>Rhizoma Zingiberis<br>Recens(生姜, Sheng<br>Jiang)15-20g | Diagnosis<br>and<br>treatment<br>of<br>COVID-19<br>(Trial<br>version<br>6/7) | Critical<br>illness<br>(Chinese<br>patent<br>medicine is<br>recommen<br>ded) | 183 | Xiyanping Injection |
| 184 | Feiyuling Spray     | Rhizoma Polygonati<br>Odorati(玉竹, Yu<br>Zhu), (克龙母参,<br>Ke Long Mu Shen),<br>Radix<br>Scutellariae(黄芩,<br>Huang Qin),<br>Fructus                                                      | Professor Chen Hua                                               | Early<br>stage/Progr<br>essive<br>stage/Critic<br>al illness                 | 184 | Feiyuling Spray     | Rhizoma Polygonati<br>Odorati(玉竹, Yu<br>Zhu), (克龙母参,<br>Ke Long Mu Shen),<br>Radix<br>Scutellariae(黄芩,<br>Huang Qin), Fructus<br>Forsythiae(连翘,                                       | Professor<br>Chen Hua                                                        | Early<br>stage/Progr<br>essive<br>stage/Critic<br>al illness                 | 184 | Feiyuling Spray     |

Forsythiae(连翘,  
Lian Qiao),  
RhizomaCyrptomiiF  
ortunei(贯众, Guan  
Zhong), Tetrastigma  
hemsleyanum Diels  
et Gilg(三叶青, San  
Ye Qing), Flos  
Lonicerae(金银花,  
Jin Yin Hua),  
Bulbus Fritillariae  
Cirrhosae(川贝母,  
Chuan Bei Mu),  
Rhizoma  
Bolbostemmatis(土  
贝母, Tu Bei Mu),  
Sarcandra glabra  
(九节茶, Jiu Jie  
Cha), Rhizoma  
Belamcandae(射干,  
She Gan), Folium  
Mori(桑叶, Sang  
Ye)

Lian Qiao),  
RhizomaCyrptomiiF  
ortunei(贯众, Guan  
Zhong), Tetrastigma  
hemsleyanum Diels  
et Gilg(三叶青, San  
Ye Qing), Flos  
Lonicerae(金银花,  
Jin Yin Hua),  
Bulbus Fritillariae  
Cirrhosae(川贝母,  
Chuan Bei Mu),  
Rhizoma  
Bolbostemmatis(土  
贝母, Tu Bei Mu),  
Sarcandra glabra  
(九节茶, Jiu Jie  
Cha), Rhizoma  
Belamcandae(射干,  
She Gan), Folium  
Mori(桑叶, Sang  
Ye)

|     |                        |                                              |                                                  |                                 |     |                        |                                              |                               |                                 |     |                        |
|-----|------------------------|----------------------------------------------|--------------------------------------------------|---------------------------------|-----|------------------------|----------------------------------------------|-------------------------------|---------------------------------|-----|------------------------|
| 185 | Tanreqing<br>Injection | Radix<br>Scutellariae(黄芩,<br>Huang Qin), (熊胆 | Diagnosis and<br>treatment of<br>COVID-19 (Trial | Critical<br>illness<br>(Chinese | 185 | Tanreqing<br>Injection | Radix<br>Scutellariae(黄芩,<br>Huang Qin), (熊胆 | Diagnosis<br>and<br>treatment | Critical<br>illness<br>(Chinese | 185 | Tanreqing<br>Injection |
|-----|------------------------|----------------------------------------------|--------------------------------------------------|---------------------------------|-----|------------------------|----------------------------------------------|-------------------------------|---------------------------------|-----|------------------------|

|                                                                                                                                                                                                        |              |                                           |                                                                                                                                                                                                        |                                             |                                           |
|--------------------------------------------------------------------------------------------------------------------------------------------------------------------------------------------------------|--------------|-------------------------------------------|--------------------------------------------------------------------------------------------------------------------------------------------------------------------------------------------------------|---------------------------------------------|-------------------------------------------|
| 粉, Xiong Dan<br>Fen), Cornu caprae<br>hircus(山羊角,<br>Shan Yang Jiao),<br>Flos Lonicerae(金<br>银花, Jin Yin Hua),<br>Fructus<br>Forsythiae(连翘,<br>Lian Qiao), The<br>auxiliary material is<br>propanediol | version 6/7) | patent<br>medicine is<br>recommend<br>ed) | 粉, Xiong Dan Fen),<br>Cornu caprae<br>hircus(山羊角,<br>Shan Yang Jiao),<br>Flos Lonicerae(金<br>银花, Jin Yin Hua),<br>Fructus<br>Forsythiae(连翘,<br>Lian Qiao), The<br>auxiliary material is<br>propanediol | of<br>COVID-19<br>(Trial<br>version<br>6/7) | patent<br>medicine is<br>recommen<br>ded) |
|--------------------------------------------------------------------------------------------------------------------------------------------------------------------------------------------------------|--------------|-------------------------------------------|--------------------------------------------------------------------------------------------------------------------------------------------------------------------------------------------------------|---------------------------------------------|-------------------------------------------|

185 TCM recipes were collected throughout nationwide for combating COVID-19. The details were shown here. NO.1 to NO.130 were the recipes could trace back basic prescriptions. Some remedies attributed to top10 basic formulas would showed in Fig 2A as well, and the corrspoded names were indicated in the last line. The raw data showing the correlation between the clinical and basic remdies were presented at the last seven lines. Specifically, the list of intersection showed the common amounts within the both, regardless of monarch and stratum herbs. If one clinically applied remedy could correspond to more than one basic remedies, the amounts would be shown in sequence and divided by "/". We then calculated the similarity, using the amounts of intersection divided by the basic amounts. In addition, as for monarch or stratum herbs, we used A/B (A showed the actual amounts in clinical recipes, and B showed the original amounts) to describe various circumstances, except for the number "1" indicated the entire cosistence (the clinically applied recipes contained all of the monarch or remedies), while "0" showed the contrary. Composing herbs within each remedy were named by Latin name (Chinese name, Chinese Pin Yin), e.g., Flos Lonicerae(金银花, Jin Yin Hua). References showed the recipe which originated from, including The Diagnosis and Treatment Protocol for COVID-19 published by national and local health administration, renown experts, agreed hospital recipes and TCM patents, etc. The applying course of each remedy was showed in the "unified phase" based on clinical indications from the "references", including preventive, developing, severe and recovery stage. In particular, different terms were used for database searching, such as "prevention", "medical observation period" and the "suspects" for preventive stage; "mild", "heat in the early period", "acute stage", "medium", "influenza", and "pneumonia" for developing stage; "seriously ill", "very

period”, “severe”, and “ICU” for severe phase; while “recovery” and “convalescence” for the recovery stage.

**Table S4. The all list of 210 used herbs among 185 recipes.**

| <b>NO.</b> | <b>Herbs(Latin scientific name (Chinese name, Chinese Pinyin))</b> | <b>Acronym</b> | <b>English Name</b>               | <b>Frequency</b> |
|------------|--------------------------------------------------------------------|----------------|-----------------------------------|------------------|
| 1          | Radix Glycyrrhizae(甘草, Gan Cao)                                    | GC             | Liquorice Root                    | 84               |
| 2          | Semen Armeniacae Amarum(杏仁, Xing Ren)                              | XR             | Bitter Apricot Seed               | 59               |
| 3          | Flos Lonicerae(金银花, Jin Yin Hua)                                   | JYH            | Honeysuckle Bud and Flower        | 55               |
| 4          | Fructus Forsythiae(连翘, Lian Qiao)                                  | LQ             | Weeping Forsythia Capsule         | 51               |
| 5          | Gypsum Fibrosum(石膏, Shi Gao)                                       | SG             | Gypsum                            | 46               |
| 6          | Herba Ephedrae(麻黄, Ma Huang)                                       | MH             | Ephedra                           | 45               |
| 7          | Radix Scutellariae(黄芩, Huang Qin)                                  | HQin           | Baical Skullcap Root              | 42               |
| 8          | Herba Agastaches(藿香, Huo Xiang)                                    | HX             | Wrinkled Gianthyssop Herb         | 42               |
| 9          | Radix Astragali seu Hedysari(黄芪, Huang Qi)                         | HQ             | Milkvetch Root                    | 40               |
| 10         | Rhizoma Phragmitis(芦根, Lu Gen)                                     | LG             | Reed Rhizome                      | 34               |
| 11         | Rhizoma Atractylodis Macrocephalae(白术, Bai Zhu)                    | BZ             | Largehead Atractylodes<br>Rhizome | 34               |
| 12         | Poria(茯苓, Fu Ling)                                                 | FL             | Indian Bread                      | 31               |
| 13         | Rhizoma Atractylodis(苍术, Cang Shu)                                 | CZ             | Atractylodes Rhizome              | 31               |
| 14         | Radix Platycodonis(桔梗, Jie Geng)                                   | JG             | Platycodon Root                   | 30               |
| 15         | Cortex Magnoliae Officinalis(厚朴, Hou Po)                           | HP             | Officinal Magnolia Bark           | 27               |
| 16         | Rhizoma Pinelliae(半夏, Ban Xia)                                     | BX             | Pinellia Tuber                    | 26               |

|    |                                                 |     |                                            |    |
|----|-------------------------------------------------|-----|--------------------------------------------|----|
| 17 | Pericarpium Citri Reticulatae(陈皮, Chen Pi)      | CP  | Dried Tangerine Peel                       | 25 |
| 18 | Radix et Rhizoma Rhei(大黄, Da Huang)             | DH  | Rhubarb Root and Rhizome                   | 25 |
| 19 | Semen Coicis(薏苡仁, Yi Yi Ren)                    | YYR | Coix Seed                                  | 25 |
| 20 | Radix Ophiopogonis(麦冬, Mai Dong)                | MD  | Dwarf Lilyturf Tuber                       | 23 |
| 21 | Radix Saposhnikoviae(防风, Fang Feng)             | FF  | Divaricate Saposhnikovia Root              | 23 |
| 22 | Herba Menthae Heplocalycis(薄荷, Bo He)           | BH  | Wild Mint Herb                             | 21 |
| 23 | Rhizoma Cyrtomii Fortunei(贯众, Guan Zhong)       | GZ  | Fortunes Boss Fern Rhizome                 | 20 |
| 24 | Radix Ginseng(人参, Ren Shen)                     | RS  | Ginseng                                    | 20 |
| 25 | Semen Lepidii(葶苈子, Ting Li Zi)                  | TLZ | Pepperweed Seed                            | 20 |
| 26 | Fructus Tsaoko(草果, Cao Guo)                     | CG  | Fruit of Caoguo                            | 18 |
| 27 | Radix Paeoniae Rubra(赤芍, Chi Shao)              | CSh | Peony Root                                 | 17 |
| 28 | Rhizoma Anemarrhenae(知母, Zhi Mu)                | ZM  | Common Anemarrhena<br>Rhizome              | 15 |
| 29 | Radix Aconiti Lateralis Preparata(附子, Fu Zi)    | FZ  | Prepared Common Monkshood<br>Branched Root | 15 |
| 30 | Adenophora stricta Miq.(沙参, Sha Shen)           | SS  | Root of Straight Ldybell                   | 14 |
| 31 | Fructus Arctii(牛蒡子, Niu Bang Zi)                | NBZ | Great Burdock Achene                       | 14 |
| 32 | Radix Bupleuri(柴胡, Chai Hu)                     | CH  | Chinese Thorowax Root                      | 14 |
| 33 | Rhizoma Zingiberis Recens(生姜, Sheng Jiang)      | SJ  | Fresh Ginger                               | 13 |
| 34 | Bulbus Fritillariae Thunbergii(浙贝母, Zhe Bei Mu) | ZBM | Thunberg Fritillary Bulb                   | 13 |
| 35 | Cortex Mori(桑白皮, Sang Bai Pi)                   | SBP | White Mulberry Root-bark                   | 13 |
| 36 | Semen Arecae(槟榔, Bin Lang)                      | BL  | Areca Seed                                 | 13 |
| 37 | Herba Schizonepetae(荆芥, Jing Jie)               | JJ  | Fineleaf Schizonepeta Herb                 | 13 |
| 38 | Lophatherum gracile(淡竹叶, Dan Zhu Ye)            | DZY | Folium Phyllostachytis                     | 13 |
| 39 | Fructus Amomi Rotundus(豆蔻, Jave Amonum Fruit)   | DK  | Jave Amonum Fruit                          | 13 |
| 40 | Fructus Trichosanthis(瓜蒌, Gua Lou)              | GL  | Snakegourd Fruit                           | 12 |

|    |                                               |     |                                           |    |
|----|-----------------------------------------------|-----|-------------------------------------------|----|
| 41 | Rhinoceros unicornis L. (犀角, Xi Jiao)         | XJ  | Rhinoceros Horn                           | 11 |
| 42 | Talcum(滑石, Hua Shi)                           | HS  | Talc                                      | 11 |
| 43 | Fructus Schisandrae Chinensis(五味子, Wu Wei Zi) | WWZ | Chinese Magnoliavine Fruit                | 11 |
| 44 | Rhizoma Coptidis(黄连, Huang Lian)              | HL  | Golden Thread                             | 10 |
| 45 | Calculus Bovis(牛黄, Niu Huang)                 | NH  | Bezoar                                    | 10 |
| 46 | Radix Codonopsis(党参, Dang Shen)               | DS  | Tangshen                                  | 10 |
| 47 | Semen Persicae(桃仁, Tao Ren)                   | TR  | Peach Seed                                | 10 |
| 48 | Radix Scrophulariae(玄参, Xuan She)             | XS  | Figwort Root                              | 10 |
| 49 | Radix Isatidis(板蓝根, Ban Lan Gen)              | BLG | Isatis Root                               | 10 |
| 50 | Fructus Corni(山茱萸, Shan Zhu Yu)               | SZY | Asiatic Cornelian Cherry Fruit            | 9  |
| 51 | Rhizoma et Radix Notopterygii(羌活, Qiang Huo)  | QH  | Incised Notopterygium<br>Rhizome and Root | 9  |
| 52 | Folium Mori(桑叶, Sang Ye)                      | SY  | Mulberry Leaf                             | 9  |
| 53 | Cornu Bubali(水牛角, Shui Niu Jiao)              | SNJ | Buffalo Horn                              | 9  |
| 54 | Radix Pseudostellariae(太子参, Tai Zi Shen)      | TZS | Heterophylly Falsestarwort<br>Root        | 9  |
| 55 | Flos Chrysanthemi(菊花, Ju Hua)                 | JH  | Chrysanthemum Flower                      | 9  |
| 56 | Folium Perillae(紫苏叶, Zi Su Ye)                | ZSY | Perilla Leaf                              | 8  |
| 57 | Moschus(麝香, She Xiang)                        | SX  | Musk                                      | 7  |
| 58 | Gardenia jasminoides Ellis(栀子, Zhi Zi)        | ZZ  | GARDENIAE FRUCTUS                         | 7  |
| 59 | Radix Curcumae(郁金, Yu Jin)                    | YJ  | Turmeric Root Tuber                       | 7  |
| 60 | Periostracum Cicadae(蝉蜕, Chan Tui)            | CT  | Cicada Slough                             | 7  |
| 61 | Folium Isatidis(大青叶, Da Qing Ye)              | DQY | Dyers Woad Leaf                           | 7  |
| 62 | Fructus Jujubae(大枣, Da Zao)                   | DZ  | Chinese Date                              | 7  |
| 63 | Herba Eupatorii(佩兰, Pei Lan)                  | PL  | Fortune Eupatorium Herb                   | 7  |
| 64 | Radix Paeoniae Alba(白芍, Bai Shao)             | BS  | Debark Peony Root                         | 7  |



|    |                                               |     |                                |   |
|----|-----------------------------------------------|-----|--------------------------------|---|
| 65 | Lumbricus(地龙, Di Long)                        | DL  | Earthworm                      | 7 |
| 66 | Rhizoma Belamcandae(射干, She Gan)              | SGa | Blackberry Lily Rhizome        | 7 |
| 67 | Semen Sojae Preparatum(淡豆豉, Dan Dou Chi)      | DDC | Fermented Soybean              | 6 |
| 68 | Semen Dolichoris Album(白扁豆, Bai Bian Dou)     | BBD | Hyacinth Bean                  | 6 |
| 69 | Herba Artemisiae Annuae(青蒿, Qing Hao)         | QH  | Sweet Wormwood Herb            | 6 |
| 70 | Polyporus Umbellatus(猪苓, Zhu Ling)            | ZL  | Agaric                         | 6 |
| 71 | Radix Angelicae Sinensis(当归, Dang Gui)        | DG  | Chinese Angelica               | 6 |
| 72 | Rhizoma Ligustici Chuanxiong(川芎, Chuan Xiong) | CXi | Sichuan Lovage Rhizome         | 6 |
| 73 | Radix Rehmanniae Recens(生地, Shen Di)          | SD  | Unprocessed Rehmannia Root     | 6 |
| 74 | Fructus Amomi Villosi(砂仁, Sha Ren)            | SR  | Villous Amomum Fruit           | 6 |
| 75 | Radix Ginseng Rubra(红参, Hong Shen)            | HoS | Red Ginseng                    | 6 |
| 76 | Cinnabaris(朱砂, Zhu Sha)                       | ZS  | Cinnabar                       | 5 |
| 77 | Borneolum Syntheticum(冰片, Bing Pian)          | BP  | Borneol                        | 5 |
| 78 | Bulbus Lili(百合, Bai He)                       | BH  | Lily Bulb                      | 5 |
| 79 | Ramulus Cinnamomi(桂枝, Gui Zhi)                | GZ  | Cassia Twig                    | 5 |
| 80 | Bombyx Batryticatus(僵蚕, Jiang Can)            | JC  | BOMBYX BATRYTICATUS            | 5 |
| 81 | Medulla Tetrapanacis(通草, Tong Cao)            | TC  | Ricepaperplant Pith            | 5 |
| 82 | Radix Panacis Quinquefolii(西洋参, Xi Yang Shen) | XYS | American Ginseng               | 5 |
| 83 | Rhizoma Alismatis(泽泻, Ze Xie)                 | ZX  | Oriental Waterplantain Rhizome | 5 |
| 84 | Radix Angelicae Dahuricae(白芷, Bai Zhi)        | BaZ | Dahurian Angelica Root         | 5 |
| 85 | Moutan Cortex(丹皮, Dan Pi)                     | DP  | Tree Peony Bark                | 5 |
| 86 | Fructus Aurantii(枳壳, Zhi Qiao)                | ZQ  | AURANTII FRUCTUS               | 5 |
| 87 | Radix Salviae Miltiorrhizae(丹参, Dan Shen)     | DS  | Danshen Root                   | 4 |
| 88 | Crataegus pinnatifida(焦山楂, Jiao Shan Zha)     | JSZ | Charred FRUCTUS CRATAEGI       | 4 |

|     |                                                 |     |                              |   |
|-----|-------------------------------------------------|-----|------------------------------|---|
| 89  | Semen Raphani(莱菔子, Lai Fu Zi)                   | LFZ | Radish Seed                  | 4 |
| 90  | Folium Eriobotryae(枇杷叶, Pi Pa Ye)               | PPY | Loquat Leaf                  | 4 |
| 91  | Herba Taraxaci(蒲公英, Pu Gong Ying)               | PGY | Dandelion                    | 4 |
| 92  | Rhizoma Acori Tatarinowii(石菖蒲, Shi Chang Pu)    | SCP | Grassleaf Sweetflag Rhizome  | 4 |
| 93  | Herba Dendrobii(石斛, Shi Hu)                     | SH  | Dendrobium                   | 4 |
| 94  | Fructus Aurantii Immaturus(枳实, Zhi Shi)         | ZSh | Immature Orange Fruit        | 4 |
| 95  | Herba Houttuyniae(鱼腥草, Yu Xing Cao)             | YXC | Heartleaf Houttuynia Herb    | 4 |
| 96  | (建曲, Jian Qu)                                   | JQ  | /                            | 4 |
| 97  | Radix Ginseng(生晒参, Sheng Shai Shen)             | SSS | Dried Fresh Ginseng          | 4 |
| 98  | Radix Puerariae(葛根, Ge Gen)                     | GG  | Kudzuvine Root               | 3 |
| 99  | Rhizoma Curcumae Longae(姜黄, Jiang Huang)        | JH  | Turmeric                     | 3 |
| 100 | Rhizoma Dioscoreae(山药, Shan Yao)                | SYa | Common Yam Rhizome           | 3 |
| 101 | Rhizoma Polygonati Odorati(玉竹, Yu Zhu)          | YZ  | Fragrant Solomonseal Rhizome | 3 |
| 102 | Radix Lithospermi(紫草, Zi Cao)                   | ZC  | Gromwell Root                | 3 |
| 103 | Styrax(苏合香, Su He Xiang)                        | SHX | Storax                       | 3 |
| 104 | Fructus Hordei Germinatus(炒麦芽, Chao Mai Ya)     | CMY | Germinated Barley            | 3 |
| 105 | Rhizoma Arisaematis Cum Bile(胆南星, Dan Nan Xing) | DNX | Bile Arisaema                | 3 |
| 106 | Rhizoma Zingiberis(干姜, Gan Jiang)               | GJ  | Zingiber                     | 3 |
| 107 | Rhizoma Paridis(重楼, Chong Lou)                  | CL  | Paris Root                   | 3 |
| 108 | Radix Peucedani(前胡, Qian Hu)                    | QH  | Hogfennel Root               | 3 |
| 109 | Flos Carthami(红花, Hong Hua)                     | HH  | Safflower                    | 3 |
| 110 | Citri Exocarpium Rubrum(橘红, Ju Hong)            | JH  | dried tangerine peel         | 2 |
| 111 | Realgar(雄黄, Xiong Huang)                        | XH  | Realgar                      | 2 |
| 112 | Massa Medicata Fermentata(神曲, Shen Qu)          | SQ  | Medicated Leaven             | 2 |
| 113 | Radix Aucklandiae(木香, Mu Xiang)                 | MX  | Common Aucklandia Root       | 2 |
| 114 | Lignum Aquilariae Resinatum (沉香, Chen Xiang)    | CX  | Chinese Eaglewood            | 2 |

|     |                                                  |     |                                                              |   |
|-----|--------------------------------------------------|-----|--------------------------------------------------------------|---|
| 115 | Flos Caryophylli (丁香, Ding Xiang)                | DX  | Clove                                                        | 2 |
| 116 | Calcitum(寒水石, Han Shui Shi)                      | HSS | Gypsum Rubrum                                                | 2 |
| 117 | Rhizoma Cimicifugae(升麻, Sheng Ma)                | SM  | Large trifolious Bugbane<br>Rhizome                          | 2 |
| 118 | (焦三仙, Jiao San Xian)                             | JSX | Including 3 herbs: Malt, Burnt<br>Hawthorn, Medicated Leaven | 2 |
| 119 | Fructus Chebulae(诃子肉, He Zi Rou)                 | HZR | Medicine Terminalia Fruit                                    | 2 |
| 120 | Rhizoma Imperatae(白茅根, Bai Mao Gen)              | BMG | Cogon Grass Rhizome                                          | 2 |
| 121 | Rhizoma Cynanchi Stauntonii(白前, Bai Qian)        | BQ  | Willowleaf Rhizome                                           | 2 |
| 122 | Rhizoma Bolbostemmatis(土贝母, Tu Bei Mu)           | TBM | Paniculate Bolbostemma                                       | 2 |
| 123 | Cortex Lycii(地骨皮, Di Gu Pi)                      | DGP | Chinese Wolfberry Root-bark                                  | 2 |
| 124 | Trollius chinensis(金莲花, Jin Lian Hua)            | JLH | Chinese Globeflower Flower                                   | 2 |
| 125 | Retinervus Citri Furctus(橘络, Ju Luo)             | JL  | Tangerine Pith                                               | 2 |
| 126 | Vigna radiata (Linn.) Wilczek(绿豆, Lv Dou)        | LD  | Mung Bean, Green Gram                                        | 2 |
| 127 | Herba Verbenae(马鞭草, Ma Bian Cao)                 | MBC | European verbena herb                                        | 2 |
| 128 | Retinervus Luffae Fructus(丝瓜络, Si Gua Luo)       | SGL | Luffa Vegetable Sponge                                       | 2 |
| 129 | Radix Cynanchi Paniculati(徐长卿, Xu Chang Qing)    | XCQ | Paniculate Swallowwort Root                                  | 2 |
| 130 | Radix Asteris(紫菀, Zi Wan)                        | ZW  | Tatarian Aster Root                                          | 2 |
| 131 | Ramulus Uncariae Cum Uncis(钩藤, Gou Teng)         | GT  | Gambir Plant Nod                                             | 2 |
| 132 | Bulbus Fritillariae Cirrhosae(川贝母, Chuan Bei Mu) | CBM | Tendrilleaf Fritillary Bulb                                  | 2 |
| 133 | Rhizoma Polygoni Cuspidati(虎杖, Hu Zhang)         | HZ  | Giant Knotweed Rhizome                                       | 2 |
| 134 | Radix Notoginseng(三七, San Qi)                    | SQ  | Sanqi                                                        | 2 |
| 135 | Fructus Perillae(苏子, Su Zi)                      | SZ  | Perilla Fruit                                                | 2 |
| 136 | Poria Rubra(赤苓, Chi Ling)                        | CL  | light red Indian Bread                                       | 1 |
| 137 | Margarita(珍珠, Zhen Zhu)                          | ZZ  | Pearl                                                        | 1 |
| 138 | Magnetitum(磁石, Ci Shi)                           | CiS | Magnetite                                                    | 1 |

|     |                                                  |     |                                              |   |
|-----|--------------------------------------------------|-----|----------------------------------------------|---|
| 139 | Cornu Saigae Tataricae(羚羊角, Ling Yang Jiao)      | LYJ | Antelope Horn                                | 1 |
| 140 | mirabilite(朴硝, Po Xiao)                          | PX  | Mirabilitum Depuratum                        | 1 |
| 141 | saltpetre(硝石, Xiao Shi)                          | XiS | Saltpeter                                    | 1 |
| 142 | Benzoinum(安息香, An Xi Xiang)                      | AXX | Benzoin                                      | 1 |
| 143 | Lignum Santali Albi(檀香, Tan Xiang)               | TX  | Sandalwood                                   | 1 |
| 144 | Rhizoma Cyperi(香附, Xiang Fu)                     | XF  | Nutgrass Galingale Rhizome                   | 1 |
| 145 | Olibanum (乳香, Ru Xiang)                          | RX  | Frankincense                                 | 1 |
| 146 | Fructus Piperis Longi(萆茛, Bi Ba)                 | BBa | Long Pepper                                  | 1 |
| 147 | Folium Artemisiae Argyi(艾叶, Ai Ye)               | AY  | Argy Wormwood Leaf                           | 1 |
| 148 | Radix Stemonae(百部, Bai Bu)                       | BB  | Stemona Root                                 | 1 |
| 149 | Herba Patriniae (败酱草, Bai Jiang Cao)             | BJC | Atrina Glass                                 | 1 |
| 150 | silkworm excrement(蚕砂, Can Sha)                  | CS  | Silkworm sand                                | 1 |
| 151 | Fructus Setariae Germinatus(炒谷芽, Chao Gu Ya)     | CGY | Millet Sprout                                | 1 |
| 152 | Semen Phaseoli(赤小豆, Chi Xiao Dou)                | CXD | Rice Bean                                    | 1 |
| 153 | Radix Dipsaci(川断, Chuan Duan)                    | CD  | Himalayan Teasel Root                        | 1 |
| 154 | Dioscorea nipponica Makino(穿山龙, Chuan Shan Long) | CSL | Dioscorea Nipponica, JapanEse<br>Yam Rhizome | 1 |
| 155 | Herba Andrographis(穿心莲, Chuan Xin Lian)          | CXL | Common Andrographis Herb                     | 1 |
| 156 | Pericarpium Arecae(大腹皮, Da Fu Pi)                | DFP | Areca Peel                                   | 1 |
| 157 | Semen Benincasae(冬瓜仁, Dong Gua Ren)              | DGR | Waxgourd Seed                                | 1 |
| 158 | Flos Farfarae(冬花, Dong Hua)                      | DH  | Common Coltsfoot Flower                      | 1 |
| 159 | Cortex Eucommiae(杜仲, Du Zhong)                   | DZ  | Eucommia Bark                                | 1 |
| 160 | Bone fossil of big mammals(煅龙骨, Duan Long Gu)    | DLG | Forged Keel                                  | 1 |
| 161 | Oyster(煅牡蛎, Duan Mu Li)                          | DML | Calcined Oyster                              | 1 |
| 162 | <i>Lycium barbarum</i> L.(枸杞, Gou Qi)            | GQ  | Lycium chinensis                             | 1 |
| 163 | lotus petiole(荷梗, He Geng)                       | HG  | Lotus Petiole                                | 1 |

|     |                                                         |      |                                                |   |
|-----|---------------------------------------------------------|------|------------------------------------------------|---|
| 164 | Herba Rhodiolae(红景天, Hong Jing Tian)                    | HJT  | Rose-boot                                      | 1 |
| 165 | japonica Rice(粳米, Jing Mi)                              | JM   | Rice                                           | 1 |
| 166 | Sarcandra glabra (九节茶, Jiu Jie Cha)                     | JJC  | Glabrous Sarcandra Herb                        | 1 |
| 167 | (克龙母参, Ke Long Mu Shen)                                 | KLMS | /                                              | 1 |
| 168 | (梨皮, Li Pi)                                             | LP   | Pear Peel                                      | 1 |
| 169 | Semen Nelumbinis(莲子, Lian Zi)                           | LZ   | Lotus Seed                                     | 1 |
| 170 | Natrii Sulfas(芒硝, Mang Xiao)                            | MX   | Crystallized Sodium Sulfate                    | 1 |
| 171 | Pericarpium Citri Reticulatae Viride(青皮, Qing Pi)       | QP   | Immature Tangerine Peel                        | 1 |
| 172 | Tetrastigma hemsleyanum Diels et Gilg(三叶青, San Ye Qing) | SYQ  | Tetrastigma hemsleyanum Diels et Gilg          | 1 |
| 173 | Ajuga decumbens thunb (散血草, San Xue Cao)                | SXC  | Herb of Clarke Boea                            | 1 |
| 174 | Radix Trichosanthis(天花粉, Tian Hua Fen)                  | THF  | Snakegourd Root                                | 1 |
| 175 | tabasheer(天竺黄, Tian Zhu Huang)                          | TZH  | Concretio silicea bambusae,tabaschir,tabasheer | 1 |
| 176 | Eupolyphaga Seu Steleophaga(土鳖, Tu Bie)                 | TB   | Ground beetle                                  | 1 |
| 177 | Rumex madaio MakinoR. daiwoo Makino(土大黄, Tu Da Huang)   | TDH  | Nepal Dock Root                                | 1 |
| 178 | Radix et Rhizome Achyranthes (土牛膝, Tu Niu Xi )          | TNX  | Native Achyranthes (root)                      | 1 |
| 179 | Asarum sieboldii Miq.(细辛, Xi Xin)                       | XX   | Asari Radix                                    | 1 |
| 180 | <i>Artemisia rupestris</i> L.(一枝蒿, Yi Zhi Hao)          | YZH  | Alpine Yarrow Herb                             | 1 |
| 181 | Herba Artemisiae Scopariae(茵陈, Yin Chen)                | YC   | Virgate Wormwood Herb                          | 1 |
| 182 | Folium Ginkgo(银杏叶, Yin Xing Ye)                         | YXY  | Ginkgo Leaf                                    | 1 |
| 183 | Caulis Bambusae in Taenia(竹茹, Zhu Ru)                   | ZR   | Bamboo Shavings                                | 1 |
| 184 | Perilla frutescens (L.) Britt.(苏梗, Su Geng)             | SG   | Stem of Common Perilla                         | 1 |
| 185 | Lignum Sappan(苏木, Su Mu)                                | SM   | Sappan Wood                                    | 1 |
| 186 | Cornu caprae hircus(山羊角, Shan Yang Jiao)                | SYJ  | Goat Horn                                      | 1 |
| 187 | (熊胆粉, Xiong Dan Fen)                                    | XDF  | PULVIS ELLIS URS                               | 1 |

|     |                                                           |      |                                    |   |
|-----|-----------------------------------------------------------|------|------------------------------------|---|
| 188 | Concha Margaritifera(珍珠母, Zhen Zhu Mu)                    | ZZM  | Nacre                              | 1 |
| 189 | Corydalis Bungeanae Herba(苦地丁, Ku Di Ding)                | KDD  | Bunge Corydalis Herb               | 1 |
| 190 | Cortex Phellodendri(黄柏, Huang Bo)                         | HB   | Amur Cork-tree                     | 1 |
| 191 | Rhizoma Smilacis Glabrae(土茯苓, Tu Fu Ling)                 | TFL  | Glabrous Greenbrier Rhizome        | 1 |
| 192 | Hirudo(水蛭, Shui Zhi)                                      | SZ   | Leech                              | 1 |
| 193 | Radix angelicae seu hemsley(独活, Du Huo)                   | DuH  | Angelica Tuhov, Radix              | 1 |
| 194 | Fructus Ligustri Lucidi(女贞子, Nv Zhen Zi)                  | NZZ  | Fruit of Glossy Privet             | 1 |
| 195 | Syzygium jambos Alston (Eugenia jambos L.)(蒲桃, Pu Tao)    | PT   | Rose Apple                         | 1 |
| 196 | Gekko gecko(蛤蚧, Ge Jie)                                   | GJ   | GECKO                              | 1 |
| 197 | Caulis Lonicerae(忍冬藤, Ren Dong Teng)                      | RDT  | Honeysuckle Stem                   | 1 |
| 198 | Euchresta japonica Hook. f. ex Regel (山豆根, Shan Dou Gen)  | SDG  | Vietnamese Sophora Root            | 1 |
| 199 | Serissa serissoides (DC.)Druce(锐过买 (白马骨), Bai Ma Gu)      | BMG  | Serissa foetida Comm.              | 1 |
| 200 | (窝嘎乃 (墨斗菜), Wo Ga Nai)                                    | WGN  | /                                  | 1 |
| 201 | Typhonium giganteum Engl. (加格略 (独角莲), Du Jiao Lian)       | DJL  | RHIZOMA TYPHONII                   | 1 |
| 202 | Polygonum perfoliatum L. (加欧万囊 (蛇倒退), She Dao Tui)        | SDT  | Herba Polygoni Perfoliati          | 1 |
| 203 | Hyratanandra hirta (Bl.) Miq. (加嘎旅 (生扯拢), Sheng Che Long) | SCL  | Herb of Fanshaped<br>Corallodiscus | 1 |
| 204 | Polygala japonica Houtt. (锐草连 (瓜子金), Zhua Zi Jin)         | ZZJ  | Japanese milkwort                  | 1 |
| 205 | Saxifraga stolonifera Curt. (窝比省(虎耳草), Hu Er Cao)         | HEC  | Saxifraga                          | 1 |
| 206 | Centellaasiatica(L.)Urban(窝比赊溜 (积雪草), Ji Xue Cao)         | JXC  | HERBA CENTELLAE                    | 1 |
| 207 | (锐阿都偏 (岩虹豆), Yan Hong Dou)                                | YHD  | /                                  | 1 |
| 208 | Mahonia oiwakensis Hayata(都阿能 (十大功劳), Shi Da Gong Lao)    | SDGL | China Mahonia                      | 1 |
| 209 | Asparagus cochinchinensis(Lour.)Merr.(天冬, Tian Dong)      | TD   | asparagus cochinchinensis          | 1 |
| 210 | Canarium album (Lour.) Raeusch. (青果, Qing Gu)             | QG   | Chinese olive                      | 1 |

210 herbs were all listed in various names (herbs Latin name, Chinese name, Chinese Pin Yin, acronyms and English name) here with the frequency applied

among all 185 clinical recipes. Some specific herbs were not equipped with all of the names due to no records could find. e.g., (锐阿都偏 (岩虹豆), Yan Hong Dou), this herb showed without corresponded Latin name and English name (using "/" indicated this condition). The ethnologic herbs (NO. 199 to NO.208) were attached the local name in Chinese, and the general name were listed in the brackets, corresponded with the Chinese Pin Yin, such as Centellaasiatica(L.)Urban(窝比踪溜 (积雪草), Ji Xue Cao).

**Table S5. The target count (TC) with directions of 8 herbs.**

| Targets                | HQi   | HQin  | JYH   | GC     | LQ  | MH   | XR  | HX  | Regulation | Total Target Counts |
|------------------------|-------|-------|-------|--------|-----|------|-----|-----|------------|---------------------|
| PTGS2 (COX2)           | -39   | -71   | -78   | -112   | -61 | -122 | -46 | -44 | Inhibited  | -573                |
| Inos (NOS2)            | -13   | -23   | -12   | -73    | -6  | -4   | -4  | -9  | Inhibited  | -144                |
| RELA (P65)             | -6    | -6    | -10   | -9     | -12 | -15  | -6  | -5  | Inhibited  | -69                 |
| TNF                    | -5    | -5    | -11   | -6     | -10 | -19  | -6  | -5  | Inhibited  | -67                 |
| IL6                    | -4    | -3    | -8    | -3     | -6  | -11  | -3  | -1  | Inhibited  | -39                 |
| MAPK14 (P38 $\alpha$ ) | -8    | -5    | -4    | -55    | -3  | -1   | -5  | -5  | Inhibited  | -86                 |
| CASP3                  | -5/+5 | -8    | -11   | -7     | -10 | -16  | +2  | +3  | Inhibited  | -47                 |
| PTGS1 (COX1)           | -28   | +/-56 | -48   | =60    | /40 | -84  | -36 | +32 | Inhibited  | -164                |
| ICAM1                  | +3    | -1    | -6    | -4     | /7  | -10  | -1  | -4  | Inhibited  | -23                 |
| IL1B                   | -2    | -1    | +3    | -3     | -5  | -7   | -2  | -3  | Inhibited  | -20                 |
| TP53 (P53)             | -2    | -4    | -5    | =/-2+2 | -4  | /6   | +1  | /2  | Inhibited  | -14                 |
| BCL2                   | +4    | -8/+8 | -8/+8 | -5     | -7  | /10  | -3  | -3  | Inhibited  | -14                 |
| TGFB1 (TGF- $\beta$ 1) | -1    | -2    | /2    | -1     | -2  | -4   | -1  | -1  | Inhibited  | -12                 |

|                       |       |       |       |      |      |          |       |    |           |     |
|-----------------------|-------|-------|-------|------|------|----------|-------|----|-----------|-----|
| MAPK1                 | +1    | -0    | /2    | -3   | -2   | -4       | /1    | -2 | Inhibited | -10 |
| CXCL8 (IL8)           | -2    | +2    | -4    | -2   | /4   | /9       | /1    | -1 | Inhibited | -7  |
| CRP                   | -1    | -0    | -1    | /1   | -1   | -2       | -1    | /1 | Inhibited | -6  |
| CCL2                  | -1    | -1    | -1    | -1   | =2   | -2       | /0    | /1 | Inhibited | -6  |
| MAPK8                 | -1    | +/-0  | -2    | -2   | /2   | /2       | /1    | -0 | Inhibited | -5  |
| FOS (C-FOS)           | -2    | -2    | -3    | -3   | -3   | +6       | /2    | +2 | Inhibited | -5  |
| IL4                   | -/+2  | +2    | -2    | -1   | +1   | -5       | -0    | +1 | Inhibited | -4  |
| IL1A                  | /1    | -0    | -1    | /1   | -1   | -2       | -0    | /1 | Inhibited | -4  |
| STAT1                 | -3    | -0    | /2    | -2   | +3   | =4       | /0    | /1 | Inhibited | -2  |
| EGFR                  | -1/+1 | +0    | /2    | +1   | /2   | -4       | -0    | +1 | Activated | -2  |
| CXCL10                | +1    | -0    | /1    | -1   | /1   | -2       | /0    | /1 | Inhibited | -2  |
| SOD1                  | +3    | +1    | +2    | -6   | +2   | -5       | +3    | +1 | Activated | +1  |
| PARP1                 | -1    | +/-0  | /1    | +1   | +2   | /3       | -0    | +1 | Activated | +3  |
| CASP8                 | -1    | +2    | /4    | +2   | /4   | /4       | /2    | +1 | Activated | +4  |
| IFNG (IFN- $\gamma$ ) | -1    | -1    | +4    | -1   | -2   | +6       | +1    | /2 | Inhibited | -6  |
| IL2                   | -1    | -1    | +3    | -2   | +2   | +6       | /0    | /3 | —         | 7   |
| CAT                   | +2    | +0    | +1    | +2   | +1   | +/-/-/-7 | +3    | +1 | Activated | +10 |
| IL10                  | -/+2  | +2    | /4    | +1   | =/-3 | +8       | -2/+2 | +2 | Activated | +13 |
| HMOX1                 | +2    | +1    | /6    | +5   | +4   | /12      | /1    | +4 | Activated | +16 |
| BAX                   | -5    | +5/-5 | -5/+5 | +4   | +7   | +9       | +2    | +2 | Activated | +19 |
| BCL2L1                | -1    | +2    | /4    | +2   | -3   | /7       | /2    | /2 | —         | 0   |
| HSPA5                 | -1    | -0    | /1    | -/+1 | =1   | /2       | /0    | /1 | Inhibited | -1  |
| MCL1                  | -0    | -/+2  | /3    | -1   | -3   | /4       | /1    | /1 | Inhibited | -4  |



Herbs were named in acronyms here. The targets listed here were related to both 8 herbs and COVID-19. The merging database with duplicates were constructed after intersection of herbs and COVID-19 targets. As each compound from an herb might modulate multiple gene targets; thus, multiple ingredients could modulate a particular target multiple times; this frequency is also called target count (TC), which is presented as the number in each cross at the table. The directions regulated by herbs were confirmed by the sufficient literature reports, at least 3 were attached each herb with each target (Next table show the details below). The fore-symbols indicated the regulatory directions, “+” was activated, “-” was inhibited, “=” showed no difference and “/” showed unlisted reports. We then identified the integrated directions of whole herbs based on whether inhibited or activated took the hand, which was shown in the “Regulation” line. For instance, MAPK1 was activated only by HQi but inhibited by 5 herbs and two unlisted, that finally confirmed to inhibited. There were two targets (IL2 and BCL2L1) can’t confirm the general orientation, due to neck and neck for inhibited or activated, thus indicated by the symbol “-”. Total target counts were the addition of 8 herbs in one target, and the direction was the same as the “Regulation” (“+” was activated, “-” was inhibited and no fore-symbol was the uncertainty).

**Table S6. The literature records of the 33 crucial targets regulated from 8 core herbs.**

| NO. | Herb                                           | Target | Regulation | Key Points of Literature                                                                                                                                                                                                                            | References                                                                                                                                                                   |
|-----|------------------------------------------------|--------|------------|-----------------------------------------------------------------------------------------------------------------------------------------------------------------------------------------------------------------------------------------------------|------------------------------------------------------------------------------------------------------------------------------------------------------------------------------|
| 1   | HQi(Phenolic derivatives from Radix Astragali) | PTGS2  | -1         | All four compounds exhibited potent inhibitory effects on TNF- $\alpha$ production and TNF- $\alpha$ , COX-2, IL-1 $\beta$ , IL-6 and iNOS mRNA expression at 50 $\mu$ M.                                                                           | Chen W, Zhang YY, Wang Z ,et al. Wang HB. Phenolic derivatives from Radix Astragali and their anti-inflammatory activities. Nat Prod Commun. 9,1577–1580(2014).              |
| 2   | HQi(Hedysarum polybotrys)                      | PTGS2  | -1         | M-EA had the highest formononetin and total proanthocyanidin content and showed stronger inhibitory effects on the production and expression of NO, PGE2, iNOS and COX-2 in LPS-activated RAW 264.7 cells and splenocytes than the other fractions. | Huang GC, Lee CJ, Wang KT, et al. Immunomodulatory effects of Hedysarum polybotrys extract in mice macrophages, splenocytes and leucopenia. Molecules. 18,14862–14875(2013). |
| 3   | HQi(Phenolic derivatives from                  | iNOS   | -1         | All four compounds exhibited potent inhibitory effects on TNF- $\alpha$ production and TNF- $\alpha$ , COX-2, IL-1 $\beta$ , IL-6                                                                                                                   | Chen W, Zhang YY, Wang Z, et al. Phenolic derivatives from Radix Astragali and their anti-inflammatory activities. Nat Prod Commun.                                          |

|   |                                       |           |    |                                                                                                                                                                                                                                                                                                                                                                                                                                                                                                        |                                                                                                                                                                                                                                                                   |
|---|---------------------------------------|-----------|----|--------------------------------------------------------------------------------------------------------------------------------------------------------------------------------------------------------------------------------------------------------------------------------------------------------------------------------------------------------------------------------------------------------------------------------------------------------------------------------------------------------|-------------------------------------------------------------------------------------------------------------------------------------------------------------------------------------------------------------------------------------------------------------------|
|   | Radix Astragali)                      |           |    | and iNOS mRNA expression at 50 $\mu$ M.                                                                                                                                                                                                                                                                                                                                                                                                                                                                | 9,1577–1580(2014).                                                                                                                                                                                                                                                |
| 4 | HQi(Hedysarum polybotrys)             | iNOS      | -1 | M-EA had the highest formononetin and total proanthocyanidin content and showed stronger inhibitory effects on the production and expression of NO, PGE2, iNOS and COX-2 in LPS-activated RAW 264.7 cells and splenocytes than the other fractions. mRNA of iNOS (Figure 3A), IL-6 (Figure 3B), TNF- $\alpha$ (Figure 3D), and C-X-C motif chemokine 10 (CXCL10) (Figure 3E) were significantly induced in the Astragalus Polysaccharide(RAP )and LPS treatment group compared with the control group. | Huang GC, Lee CJ, Wang KT, et al. Immunomodulatory effects of Hedysarum polybotrys extract in mice macrophages, splenocytes and leucopenia. <i>Molecules</i> . 18,14862–14875(2013)                                                                               |
| 5 | HQi(Astragalus Polysaccharide RAP)    | iNOS      | +1 | The proliferative capacity of osteoarthritis chondrocytes after treatment with 5, 10, 20 and 20 mg / L astragalus total flavonoids increased, the content of IL-6 and IL-1 $\beta$ in the cell culture supernatant decreased, and the activities of SOD and GSH-Px increased. NF- $\kappa$ Bp65 and MMP-13 protein expression levels decreased (P <0.05)                                                                                                                                               | Wei Wei,Zhi-Peng Li,Zhao-Xiang Bian,et al. Astragalus Polysaccharide RAP Induces Macrophage Phenotype Polarization to M1 via the Notch Signaling Pathway. <i>Molecules</i> . 24,(2019).                                                                           |
| 6 | HQi(total flavonoids of Astragalus)   | RELA(P65) | -1 |                                                                                                                                                                                                                                                                                                                                                                                                                                                                                                        | Ren Weiliang, Jiao Yongwei, Zhang Jian, et al.Effects of total flavonoids of Astragalus on oxidative stress and secretion of inflammatory factors in chondrocytes of osteoarthritis. <i>Journal of Zhengzhou University(Medical Sciences)</i> . 54,603-606(2019). |
| 7 | HQi(Astragalus polysaccharide (APS) ) | TNF       | -1 | Astragalus polysaccharide (APS) can inhibit the secretion of TNF $\alpha$ , NO and IL-1 by activated macrophages to varying degrees                                                                                                                                                                                                                                                                                                                                                                    | Lu Jingtao, Yang Yan, Chen Minzhu. Effect of astragalus polysaccharides on IL-1, NO and TNF $\alpha$ secreted by lipopolysaccharide-induced normal rat peritoneal macrophages. <i>Acta Universitatis Medicinalis Anhui</i> . 39,(2004).                           |
| 8 | HQi(Astragalus Polysaccharide( RAP )) | TNF       | +1 | mRNA of iNOS (Figure 3A), IL-6 (Figure 3B), TNF- $\alpha$ (Figure 3D), and C-X-C motif chemokine 10 (CXCL10) (Figure 3E) were significantly induced in the Astragalus Polysaccharide(RAP )and LPS treatment                                                                                                                                                                                                                                                                                            | Wei Wei,Zhi-Peng Li,Zhao-Xiang Bian,et al. Astragalus Polysaccharide RAP Induces Macrophage Phenotype Polarization to M1 via the Notch Signaling Pathway. <i>Molecules</i> . 24,(2019).                                                                           |

|    |                                                         |     |    |                                                                                                                                                                                                                                                                                                                                                                                                                                                                                                                                            |                                                                                                                                                                                                                                                                                      |
|----|---------------------------------------------------------|-----|----|--------------------------------------------------------------------------------------------------------------------------------------------------------------------------------------------------------------------------------------------------------------------------------------------------------------------------------------------------------------------------------------------------------------------------------------------------------------------------------------------------------------------------------------------|--------------------------------------------------------------------------------------------------------------------------------------------------------------------------------------------------------------------------------------------------------------------------------------|
| 9  | HQi(Astragaloside)                                      | TNF | -1 | <p>group compared with the control group.</p> <p>The mental state of mice pretreated with AS-IV improved somewhat and the survival rate increased significantly; the bacterial load of blood, abdominal fluid and various organs decreased; the expression of CXCR2 on the surface of neutrophils was significantly increased, and CXCL2 tended to increase</p> <p>Neutrophils, increase the number of neutrophils in blood and peritoneal fluid; at the same time, the level of inflammatory factor TNF-<math>\alpha</math> decreases</p> | Huang Ping. Study on the effect of astragaloside on the bactericidal activity of neutrophils. Guangdong Pharmaceutical University. (2017).                                                                                                                                           |
| 10 | HQi(Astragalus polysaccharides)                         | TNF | -1 | <p>We also found that the decreased viral replication after APS treatment was associated with reduced mRNA levels of the cytokines IL-1B, IL-6, IL-8 and TNF-<math>\alpha</math></p> <p>At most time points, the titer of IBV-specific antibodies, lymphocyte proliferation, and IL-1<math>\beta</math>, IL-2, IL-8, and TNF-<math>\alpha</math> mRNA expression levels were higher in three APS groups than in the vaccine control group, and these increases were dose-dependent.</p>                                                    | Zhang P, Liu X, Liu H, et al. Astragalus polysaccharides inhibit avian infectious bronchitis virus infection by regulating viral replication. <i>Microb Pathog.</i> 114,124–128(2018).                                                                                               |
| 11 | HQi(Astragalus polysaccharides)                         | TNF | +1 | <p>COPD showed defective AM phagocytosis and increased levels of interleukin (IL)-6, IL-8, and tumor necrosis factor (TNF)-<math>\alpha</math> in bronchoalveolar lavage fluid and serum. PM2.5 exposure aggravated the damage, and this effect was reversed by APS and CPP gavage.</p> <p>The combination group had reduced levels of IL-1<math>\beta</math>, IL-8, and TNF-<math>\alpha</math> in LPS-induced MSCs, much more than in the other 2 groups. Compared with the other</p>                                                    | Zhang P, Wang J, Wang W, et al. Astragalus polysaccharides enhance the immune response to avian infectious bronchitis virus vaccination in chickens. <i>Microb Pathog.</i> 111,81–85(2017).                                                                                          |
| 12 | HQi(Astragalus and Codonopsis pilosula polysaccharides) | TNF | -1 |                                                                                                                                                                                                                                                                                                                                                                                                                                                                                                                                            | Chu X, Liu XJ, Qiu JM, Zeng XL, Bao HR, Shu J. Effects of Astragalus and Codonopsis pilosula polysaccharides on alveolar macrophage phagocytosis and inflammation in chronic obstructive pulmonary disease mice exposed to PM2.5. <i>Environ Toxicol Pharmacol.</i> 48, 76–84(2016). |
| 13 | HQi(Astragaloside and Baicalin)                         | TNF | -1 |                                                                                                                                                                                                                                                                                                                                                                                                                                                                                                                                            | Zhu L, Liu YJ, Shen H, Gu PQ, Zhang L. Astragalus and Baicalein Regulate Inflammation of Mesenchymal Stem Cells (MSCs) by the Mitogen-Activated Protein Kinase (MAPK)/ERK Pathway. <i>Med Sci</i>                                                                                    |

|    |                                                                   |     |    |                                                                                                                                                                                                                                                                                                            |                                                                                                                                                                                                                    |
|----|-------------------------------------------------------------------|-----|----|------------------------------------------------------------------------------------------------------------------------------------------------------------------------------------------------------------------------------------------------------------------------------------------------------------|--------------------------------------------------------------------------------------------------------------------------------------------------------------------------------------------------------------------|
|    |                                                                   |     |    | groups, the combination of Astragaloside and Baicalin more efficiently reduced IL-1 $\beta$ , IL-8, and TNF- $\alpha$ levels in the LPS-induced MSCs model, and ERK inhibitor was capable of recovering the inflammatory effect.                                                                           | Monit. 23,3209–3216(2017).                                                                                                                                                                                         |
| 14 | HQi(Astragalus)                                                   | IL6 | -1 | Astragalus can reduce the concentration of IL-1, IL-6, IFN- $\gamma$ , and TNF- $\alpha$ in children with viral myocarditis, and increase the level of HSP70                                                                                                                                               | Niu Ling, An Xinjiang, Xu Hui, et al. Fu Mingyu, Wang Qingwen, Li Chunli, Xu Yongmao.Effect of Astragalus Membranaceus on Cytokines and HSP70 in Children with Viral Myocarditis.Hebei Medicine. 26,154-158(2020). |
| 15 | HQi(Phenolic derivatives from Radix Astragali)                    | IL6 | -1 | All four compounds exhibited potent inhibitory effects on TNF- $\alpha$ production and TNF- $\alpha$ , COX-2, IL-1 $\beta$ , IL-6 and iNOS mRNA expression at 50 $\mu$ M.                                                                                                                                  | Chen W, Zhang YY, Wang Z, Luo XH, Sun WC, Wang HB. Phenolic derivatives from Radix Astragali and their anti-inflammatory activities. Nat Prod Commun. 9,1577–1580(2014).                                           |
| 16 | HQi(the Astragalus polysaccharide (APS) )                         | IL6 | -1 | Compared with the control group, the Astragalus polysaccharide (APS) group IL 1 $\beta$ , IL 2, IL 6, IL 12, TNF $\alpha$ , INF $\gamma$ , Fas, iNOS mRNA expression levels were significantly reduced, IL 4, IL 5, IL 10, TGF $\beta$ , Bcl 2, SOD mRNA expression levels were significantly up-regulated | Chen Wei, Yu Maohua, Liu Fang.Effects of Astragalus Polysaccharides of Gene Expression of Cytokines of NOD Mice's Islets.Fudan University Journal of Medical Sciences. 607-610 (2004)                              |
| 17 | HQi(Both Yupingfeng polysaccharide and Astragalus polysaccharide) | IL6 | +1 | Both Yupingfeng polysaccharide and Astragalus polysaccharide can significantly increase the levels of SIgA, IL-2, TGF- $\beta$ 1 and IL-6 in mice (P <0.05 or P <0.01)                                                                                                                                     | DENG Hua, YANG Hong, JIANG Yan-ping,et al.Regulatory Effects of Yupingfeng Polysaccharides on Intestinal Mucosal Immune Response and Immune Injury in Mice.Chinese Journal of Veterinary Drug 52, 43-48 (2018) .   |
| 18 | HQi(Cisplatin combined with astragaloside)                        | IL6 | -1 | Cisplatin combined with astragaloside IV is superior to cisplatin alone in the treatment of breast cancer in rats ~ + Level, down-regulate IL-1, IL-6, TNF- $\alpha$ , CD8 ~ +                                                                                                                             | Liu Tiegang, Wen Chunyan, Shen Xuansan.Effects of cisplatin combined with astragaloside on inflammatory factors and immune function in breast cancer rats.Chinese Journal of Gerontology 40,                       |

|    |                                                         |                        |    |                                                                                                                                                                                                                                                                                                                                                                               |                                                                                                                                                                                                                                                                    |
|----|---------------------------------------------------------|------------------------|----|-------------------------------------------------------------------------------------------------------------------------------------------------------------------------------------------------------------------------------------------------------------------------------------------------------------------------------------------------------------------------------|--------------------------------------------------------------------------------------------------------------------------------------------------------------------------------------------------------------------------------------------------------------------|
| 19 | HQi(Astragalus Polysaccharide RAP)                      | IL6                    | +1 | level mRNA of iNOS (Figure 3A), IL-6 (Figure 3B), TNF- $\alpha$ (Figure 3D), and C-X-C motif chemokine 10 (CXCL10) (Figure 3E) were significantly induced in the Astragalus Polysaccharide(RAP )and LPS treatment group compared with the control group.                                                                                                                      | 863-865 (2020) .<br>Wei Wei,Zhi-Peng Li,Zhao-Xiang Bian,et al. Astragalus Polysaccharide RAP Induces Macrophage Phenotype Polarization to M1 via the Notch Signaling Pathway. <i>Molecules</i> . 24, (2019) .                                                      |
| 20 | HQi(Astragalus polysaccharides)                         | IL6                    | -1 | We also found that the decreased viral replication after APS treatment was associated with reduced mRNA levels of the cytokines IL-1B, IL-6, IL-8 and TNF- $\alpha$                                                                                                                                                                                                           | Zhang P, Liu X, Liu H, et al. Astragalus polysaccharides inhibit avian infectious bronchitis virus infection by regulating viral replication. <i>Microb Pathog</i> . 114,124–128(2018).                                                                            |
| 21 | HQi(Astragalus and Codonopsis pilosula polysaccharides) | IL6                    | -1 | COPD showed defective AM phagocytosis and increased levels of interleukin (IL)-6, IL-8, and tumor necrosis factor (TNF)- $\alpha$ in bronchoalveolar lavage fluid and serum. PM2.5 exposure aggravated the damage, and this effect was reversed by APS and CPP gavage. Astragalus polysaccharide can significantly improve the                                                | Chu X, Liu XJ, Qiu JM,et al. Effects of Astragalus and Codonopsis pilosula polysaccharides on alveolar macrophage phagocytosis and inflammation in chronic obstructive pulmonary disease mice exposed to PM2.5. <i>Environ Toxicol Pharmacol</i> . 48,76–84(2016). |
| 22 | HQi(Astragalus polysaccharide)                          | MAPK14 (P38 $\alpha$ ) | -1 | cardiac function and reduce myocardial injury in diabetic cardiomyopathy model rats, and its role may be related to the inhibition of MAPK signaling pathway activity                                                                                                                                                                                                         | Wang Yu, Yu Ruixue, Hu Sibao,et al. Protective effect of astragalus polysaccharide on diabetic cardiomyopathy model rats. <i>The Chinese Journal of Clinical Pharmacology</i> . 35,2754-2758(2019).                                                                |
| 23 | HQi(Astragalus Polysaccharides )                        | CASP3                  | +1 | APS significantly promoted anti-proliferative and apoptotic effects of cisplatin on nasopharyngeal carcinoma cells. APS also enhanced the anti-tumor effects and cisplatin-induced apoptosis in the xenograft model. The level of Bcl-2 decreased, while the levels of Bax, caspase-3, and caspase-9 increased in cisplatin combined with APS treatment compared to cisplatin | Zhou Zhen,Meng Minhua,Ni Haifeng,Chemosensitizing Effect of Astragalus Polysaccharides on Nasopharyngeal Carcinoma Cells by Inducing Apoptosis and Modulating Expression of Bax/Bcl-2 Ratio and Caspases. <i>Med. Sci. Monit</i> . 23,462-469(2017).               |

|    |                                                             |                    |    |                                                                                                                                                                                                                                                                                                                                                                                                                                                                                                                                                                                                                                                                                                                                                                                                                                                                                                                                                                         |                                                                                                                                                                                                                                                       |
|----|-------------------------------------------------------------|--------------------|----|-------------------------------------------------------------------------------------------------------------------------------------------------------------------------------------------------------------------------------------------------------------------------------------------------------------------------------------------------------------------------------------------------------------------------------------------------------------------------------------------------------------------------------------------------------------------------------------------------------------------------------------------------------------------------------------------------------------------------------------------------------------------------------------------------------------------------------------------------------------------------------------------------------------------------------------------------------------------------|-------------------------------------------------------------------------------------------------------------------------------------------------------------------------------------------------------------------------------------------------------|
| 24 | HQi(hedysari polysaccharide )                               | CASP3              | -1 | <p>only treatment. The ratio of Bax to Bcl-2 was significantly enhanced by the APS to cisplatin</p> <p>We found that caspase-3 is overexpressed in high glucose-induced apoptosis; HPS can inhibit apoptosis in high glucose state, inhibit the generation of ROS, and inhibit the overexpression of JNK and caspase-3</p> <p>The WB results of gastric cancer cells show that specific protein bands can be seen at the relative molecular mass of <math>70 \times 10^3</math> in COX-1 groups, and specific protein bands can be seen at <math>80 \times 10^3</math> in the COX-2 groups. Gray scale analysis of each band, two drugs have inhibitory effects on COX1 \ COX2, Astragalus is greater than celecoxib</p> <p>Application of astragalus can help reduce liver function damage caused by OJ and have a protective effect on liver cells. The mechanism may be related to reducing the expression of TNF-<math>\alpha</math> and ICAM-1 in liver cells.</p> | <p>Liu Jing,Deng Wenjuan,Fan Lei et al. The role of radix hedysari polysaccharide on the human umbilical vein endothelial cells (HUVECs) induced by high glucose. .Eur. J. Intern. Med. 23,287-92(2012).</p>                                          |
| 25 | HQi(Astragalus)                                             | PTGS1(COX1)        | -1 | <p>Astragalus is greater than celecoxib</p> <p>Application of astragalus can help reduce liver function damage caused by OJ and have a protective effect on liver cells. The mechanism may be related to reducing the expression of TNF-<math>\alpha</math> and ICAM-1 in liver cells.</p>                                                                                                                                                                                                                                                                                                                                                                                                                                                                                                                                                                                                                                                                              | <p>Shen Hong, Liu Zengwei, Zhang Kun,et al.Effect of Astragalus membranaceus on expression of COX-1, COX-2, VEGF and PGE-2 in gastric cancer cell line SGC7901.Tumor. 194-198(2007).</p>                                                              |
| 26 | HQi(Astragalus injection)                                   | ICAM1              | -1 | <p>Application of astragalus can help reduce liver function damage caused by OJ and have a protective effect on liver cells. The mechanism may be related to reducing the expression of TNF-<math>\alpha</math> and ICAM-1 in liver cells.</p>                                                                                                                                                                                                                                                                                                                                                                                                                                                                                                                                                                                                                                                                                                                          | <p>Zhang Xinyu, Hu Fengai, Li Dezhi.The effects of astragalus injection on expression of TNF-<math>\alpha</math> and ICAM-1 in liver cells of rats with Obstructive Jaundice.Journal of Binzhou Medical University. 18-21(2015).</p>                  |
| 27 | HQi(Scutellaria baicalensis stem and leaf total flavonoids) | ICAM1              | -1 | <p>SSTF has an anti-AS effect, which may be related to the down-regulation of VCAM-1 and ICAM-1 expression, thereby inhibiting the inflammation of the blood vessel wall</p>                                                                                                                                                                                                                                                                                                                                                                                                                                                                                                                                                                                                                                                                                                                                                                                            | <p>Zhou Xiaohui, Ren Liqun, Gao Xuan, et al. Effects of scutellaria baicalensis stem and leaf total flavonoids on the expression of VCAM-1 and ICAM-1 in hyperlipidemia rabbit aorta .<i>Chinese Journal of Gerontology</i>.30, 3124- 3126(2010).</p> |
| 28 | HQi(Phenolic derivatives from Radix Astragali)              | IL1B(IL1 $\beta$ ) | -1 | <p>All four compounds exhibited potent inhibitory effects on TNF-<math>\alpha</math> production and TNF-<math>\alpha</math>, COX-2, IL-1<math>\beta</math>, IL-6 and iNOS mRNA expression at 50 <math>\mu</math>M.</p>                                                                                                                                                                                                                                                                                                                                                                                                                                                                                                                                                                                                                                                                                                                                                  | <p>Chen W, Zhang YY, Wang Z, et al. Phenolic derivatives from Radix Astragali and their anti-inflammatory activities. Nat Prod Commun. 9,1577–1580(2014).</p>                                                                                         |
| 29 | HQi(Astragalus)                                             | IL1B(IL1 $\beta$ ) | -1 | <p>Compared with the control group, the mRNA</p>                                                                                                                                                                                                                                                                                                                                                                                                                                                                                                                                                                                                                                                                                                                                                                                                                                                                                                                        | <p>Chen Wei, Yu Maohua, Liu Fang.Effects of Astragalus</p>                                                                                                                                                                                            |

|    |                                  |             |    |                                                                                                                                                                                                                                                                                                                                                                                                                       |                                                                                                                                                                                                                          |
|----|----------------------------------|-------------|----|-----------------------------------------------------------------------------------------------------------------------------------------------------------------------------------------------------------------------------------------------------------------------------------------------------------------------------------------------------------------------------------------------------------------------|--------------------------------------------------------------------------------------------------------------------------------------------------------------------------------------------------------------------------|
|    | Polysaccharides HQi)             | β)          |    | expression levels of IL 1β, IL 2, IL 6, IL 12, TNF α, INF γ, Fas, and iNOS in the APS group were significantly down-regulated, IL 4, IL 5, IL 10, TGF β, Bcl 2 , SOD mRNA expression level was significantly increased                                                                                                                                                                                                | Polysaccharides of Gene Expression of Cytokines of NOD Mice's Islets. Fudan University Journal of Medical Sciences. 607-610(2004)                                                                                        |
| 30 | HQi(Astragalus polysaccharides)  | IL1B(IL1 β) | -1 | We also found that the decreased viral replication after APS treatment was associated with reduced mRNA levels of the cytokines IL-1B, IL-6, IL-8 and TNF-α. At most time points, the titer of IBV-specific antibodies, lymphocyte proliferation, and IL-1β, IL-2, IL-8, and TNF-α mRNA expression levels were higher in three APS groups than in the vaccine control group, and these increases were dose-dependent. | Zhang P, Liu X, Liu H, et al. Astragalus polysaccharides inhibit avian infectious bronchitis virus infection by regulating viral replication. Microb Pathog. 114,124–128(2018).                                          |
| 31 | HQi(Astragalus polysaccharides)  | IL1B(IL1 β) | +1 | The combination group had reduced levels of IL-1β, IL-8, and TNF-α in LPS-induced MSCs, much more than in the other 2 groups. Compared with the other groups, the combination of Astragaloside and Baicalin more efficiently reduced IL-1β, IL-8, and TNF-α levels in the LPS-induced MSCs model, and ERK inhibitor was capable of recovering the inflammatory effect.                                                | Zhang P, Wang J, Wang W, et al. Astragalus polysaccharides enhance the immune response to avian infectious bronchitis virus vaccination in chickens. Microb Pathog. 111,81–85(2017).                                     |
| 32 | HQi(Astragalus and Baicalein)    | IL1B(IL1 β) | -1 | Astragalus polysaccharide can down-regulate the expression of P53, P65, VEGF protein in PLGC model rats, reduce AI, thereby controlling the progress of PLGC                                                                                                                                                                                                                                                          | Zhu L, Liu YJ, Shen H, Gu PQ, Zhang L. Astragalus and Baicalein Regulate Inflammation of Mesenchymal Stem Cells (MSCs) by the Mitogen-Activated Protein Kinase (MAPK)/ERK Pathway. Med Sci Monit. 23,3209–3216(2017).    |
| 33 | HQi(Astragalus Polysaccharides ) | TP53 (P53 ) | -1 | To study the effect and mechanism of Astragalus Decoction (AE) on renal tubular cell apoptosis in rats                                                                                                                                                                                                                                                                                                                | Xu Jingwen, Wang Nan. Effects of Astragalus Polysaccharides on the Protein Expression of P53,P65,VEGF and AI in Gastric Mucosa of Rats with Precancerous Lesions of Gastric Cancer. China Pharmacy. 027,3069-3071(2016). |
| 34 | HQi(Astragalus Decoction (AE))   | BCL2        | +1 |                                                                                                                                                                                                                                                                                                                                                                                                                       | Zhou Kan, Lu Dongning, Tao Zhihu. Effect of Astragalus Decoction on Apoptosis of Renal Tubular Cells in Rats with IR Injury and Its                                                                                      |

|    |                                       |              |    |                                                                                                                                                                                                                                                                                                                                                                                                         |                                                                                                                                                                                                        |
|----|---------------------------------------|--------------|----|---------------------------------------------------------------------------------------------------------------------------------------------------------------------------------------------------------------------------------------------------------------------------------------------------------------------------------------------------------------------------------------------------------|--------------------------------------------------------------------------------------------------------------------------------------------------------------------------------------------------------|
|    |                                       |              |    | with renal ischemia-reperfusion injury. The expression of Bax and Fas in the AE pretreatment group decreased significantly (P <0.05), while the expression of Bcl-2 increased significantly (P <0.05), so Bax / Bcl-2 decreased (P <0.05)                                                                                                                                                               | Mechanism Analysis.Guangxi Journal of Traditional Chinese Medicine. 42,39-41(2019).                                                                                                                    |
| 35 | HQi(Astragalus)                       | BCL2         | -1 | Astragalus can promote the apoptosis of leukemia cells and improve the efficacy of patients. The mechanism may be by reducing the expression of Bcl-2 and BCL-xl and increasing the expression of Bax and Bak.                                                                                                                                                                                          | Yu Dan, Cheng Hui, Yi Xue, et al.The Influence of Astragalus on BCL-2's family in Eld patients with acute myeloid leukemia.Harbin Medical Journal. 36,501-503(2016).                                   |
| 36 | HQi(Astragalus polysaccharide)        | TGFB1(TGFβ1) | -1 | this increase in tissue factor (TF), transforming growth factor (TGF-β), and interleukin-8 (IL-8) could be inhibited by the addition of APS. The immune response mediated by Toll-like receptor 4 (TLR4) in ECs may be unregulated by CSFV as it was also inhibited by pre-treatment with APS.                                                                                                          | Zhuge Z, Dong Y, Li L, et al. Effects of astragalus polysaccharide on the adhesion-related immune response of endothelial cells stimulated with CSFV in vitro. PeerJ . 5,e3862(2017).                  |
| 37 | HQi(Astragalus polysaccharide (APS) ) | TGFB1(TGFβ2) | -1 | Astragalus polysaccharide (APS) significantly reduced fasting blood glucose, blood creatinine, urea nitrogen, urine KIM-1, and urine OPN concentration in DM rats, and inhibited the activity of renal TGF-β1 / Smads signaling pathway. Conclusion APS has renal protective effect on DM rats, and its mechanism may be related to the inhibition of TGF-β1 / Smad signaling pathway in DM rat kidney. | Li Chengde, Wang Yu, Qu Jingrong,et al.Effects of astragalus polysaccharide on renal TGF-β1/Smads signaling pathway in rats with diabetes mellitus.Chinese Pharmacological Bulletin. 34,512-516(2018). |
| 38 | HQi(Astragalus polysaccharides)       | MAPK1        | +1 | Astragalus polysaccharides can increase the activity of ERK and Akt after ischemia-reperfusion injury in human cardiomyocytes and reduce apoptosis                                                                                                                                                                                                                                                      | Fan Zongjing, Xie Liandi, Cui Jie, et al.Study on the expression of ERK and Akt on HCMEC of myocardial ischemia-reperfusion injury and the effects of astragalus polysaccharides.Global                |



|    |                                       |             |    |                                                                                                                                                                                                                                                                                                                                       |                                                                                                                                                                                                                                                                                                       |
|----|---------------------------------------|-------------|----|---------------------------------------------------------------------------------------------------------------------------------------------------------------------------------------------------------------------------------------------------------------------------------------------------------------------------------------|-------------------------------------------------------------------------------------------------------------------------------------------------------------------------------------------------------------------------------------------------------------------------------------------------------|
| 39 | HQi(Astragaloside IV)                 | CXCL8 (IL8) | -1 | Astragaloside IV can protect the gastric mucosal Injury Induced by clopidogrel by reducing the levels of serum inflammatory factors IL-6, IL-8 and TNF- $\alpha$                                                                                                                                                                      | Traditional Chinese Medicine.11,207-210(2018).<br>Zhang Jing, Wang Yanrong, Zhang Qiuzhan.Effects of Astragaloside IV on Serum IL-6, IL-8 and TNF- $\alpha$ in Rats with Gastric Mucosal Injury Induced by Clopidogrel.Journal of Hebei North University(Natural Science Edition). 34,12-14,18(2018). |
| 40 | HQi(Astragalus mongholicus injection) | CRP         | -1 | Before treatment, there were no statistically significant differences in cTnI, hs-CRP, CK-MB, miR-146b, miR-155, IL-10, TNF- $\beta$ , IL-17, IL-21, etc. Serum cTnI, hs-CRP, CK-MB and other myocardial injury indicators were lower than before treatment, and the observation group was significantly lower than the control group | Qi Guibin, Gao Jianbu.Effect of Astragalus Injection on miR and Treg / Th17 Cytokines in Patients with Viral Myocarditis.Journal of Chinese Medicinal Materials. 42,924-927(2019).                                                                                                                    |
| 41 | HQi(Huangqi glycoprotein)             | CCL2        | -1 | HQGP treatment also reduced the expression of chemokines such as CCL2 and CCL5 and the production of tumor necrosis factor $\alpha$ (TNF- $\alpha$ ), interleukin (IL)-1 $\beta$ , IL-6, but increased the level of IL-10.                                                                                                            | Xing Y, Liu B, Zhao Y, et al. Immunomodulatory and neuroprotective mechanisms of Huangqi glycoprotein treatment in experimental autoimmune encephalomyelitis. Folia Neuropathol. 57,117–128(2019).                                                                                                    |
| 42 | HQi(Astragalus)                       | CCL2        | -1 | In brain, chemokines such as CCL2 and CCL5 were inhibited in HQGP-treated EAE compared with control mice.                                                                                                                                                                                                                             | Zhang H, Guo M, Zhang L, et al. Folia Neuropathol. 55,308–316(2017).                                                                                                                                                                                                                                  |
| 43 | HQi(Astragalus mongholicus injection) | CCL2        | -1 | Astragalus injection can significantly reduce the expression level of ccl2mrna and the activity of ccl2 protein in rat serum and lung tissue                                                                                                                                                                                          | Wang Jun. The Preventive and therapeutic effect of astragalus mongholicus injection on acute radiation-induced lung and its mechanism [D].Hubei University Of Traditional Chinese Medicine. (2015).                                                                                                   |
| 44 | HQi(Astragalus polysaccharide)        | MAPK8(JNK)  | -1 | Astragalus polysaccharides (APS) alleviate LPS-induced cardiomyocyte apoptosis by inhibiting                                                                                                                                                                                                                                          | Han Lin, Wang Hongxin, Lu Meili.Effect of Astragalus polysaccharide on LPS-induced cardiomyocyte apoptosis by                                                                                                                                                                                         |

|    |                                |            |    |                                                                                                                                                                                                                                                                                                                                                                  |                                                                                                                                                                                                                                                      |
|----|--------------------------------|------------|----|------------------------------------------------------------------------------------------------------------------------------------------------------------------------------------------------------------------------------------------------------------------------------------------------------------------------------------------------------------------|------------------------------------------------------------------------------------------------------------------------------------------------------------------------------------------------------------------------------------------------------|
|    |                                |            |    | NF-κB and JNK signaling pathways.                                                                                                                                                                                                                                                                                                                                | inhibiting NF-κB and JNK signaling pathway.Chinese Pharmacological Bulletin.34,243-249(2018).                                                                                                                                                        |
| 45 | HQi(Astragalus polysaccharide) | FOS(C-FOS) | +1 | After treatment with APS, the number of hippocampal neuronal apoptosis in rats with traumatic brain injury was significantly reduced, the expression of c-fos protein and genes in brain tissue was up-regulated, and the content of NO decreased (P <0.01).                                                                                                     | Wu Dan, Zhao Yanhe, Zhang Haibo,et al.Effects of Astragalus Polysaccharide on hippocampal neuronal apoptosis and cfos and NO contents in brain tissue of rats with brain injury.Progress of Anatomical Sciences.25,579-582(2019).                    |
| 46 | HQi(Astragalus polysaccharide) | FOS(C-FOS) | -1 | APS intervention significantly inhibited the activity of NF-κB and MAPK signaling pathways in rat hippocampus (all P <0.05), and reduced the levels of p-c-Fos and p-c-Jun (all P <0.05)                                                                                                                                                                         | Li Chengde. The antidepressant effects and the mechanism of Astragalus polysaccharide in rat models of depression induced by chronic unpredictable mild stress and lipopolysaccharide[D].Shandong University Of Traditional Chinese Medicine.(2018). |
| 47 | HQi(Astragalus)                | FOS(C-FOS) | +1 | After astragalus intervention, the blood sugar decreased slightly during acute hypoglycemia, which had no effect on the basic blood glucose. Epinephrine and Cortisol in the Astragalus group were significantly higher than those in the control group. The expression of c-fos in PVN of Astragalus group was significantly higher than that of control group. | Mao Dandan, Chen Gang, Lu Lingyun,et al.Effective component of Radix Astragali on impaired retroregulation of endocrine in rat models induced by hypoglycemia.Shanghai Journal of Traditional Chinese Medicine. 46,64-66(2012).                      |
| 48 | HQi(Astragalus polysaccharide) | FOS(C-FOS) | -1 | Stress control group (B), intraperitoneal injection of 0.5ml saline per day after amputation; stress + APS high (C), medium (D), low (E) dose group, APS1000mgkg, 500mgkg, 250mgkg, respectively The saline was diluted to 0.5ml intraperitoneally and injected once a day. Compared with group B, the expressions of NFκBmRNA and IL10mRNA in thymus            | Zeng Guangxian, Liu Junying, Xiong Jinrong, et al.Study on effect of Astragalus polysaccharide for traumatic stress mice cell immunity.Chinese Journal of Microbiology and Immunology. 20-23(2004).                                                  |

|    |                                            |                      |    |                                                                                                                                                                                                                                                                                                                                                                                                                                                       |                                                                                                                                                                                                                                                                        |
|----|--------------------------------------------|----------------------|----|-------------------------------------------------------------------------------------------------------------------------------------------------------------------------------------------------------------------------------------------------------------------------------------------------------------------------------------------------------------------------------------------------------------------------------------------------------|------------------------------------------------------------------------------------------------------------------------------------------------------------------------------------------------------------------------------------------------------------------------|
| 49 | HQi(astragalosides)                        | FOS(C-FOS)           | -1 | <p>and spleen tissues of mice in groups C, D and E were suppressed (P &lt;0.01); CD4 + antigen level and CD4 + CD8 + ratio in thymus and spleen tissues were increased (P &lt;0.01 ); C-fos antigen levels in thymus and spleen tissue decreased (P &lt;0.01)</p> <p>astragalosides can reduce the content of smooth muscle in atherosclerotic plaques, and its mechanism may be related to the reduction of Ras, c-jun, c-fos, c-myc expression.</p> | Li Jun'an, Zhang Guoyuan, fan quming, et al.Effects of astragalosides on smooth muscle in rabbit atherosclerotic plaques.Pharmacology and Clinics of Chinese Materia Medica. 25,25-27(2009).                                                                           |
| 50 | HQi(Astragalus )                           | IL4                  | -1 | <p>Astragalus intervention mice compared with each group of asthma model mice IL-2 content in alveolar lavage fluid increased, IL-4 content was significantly reduced (P &lt;0.01); Astragalus + hormone intervention group compared with simple hormone group, IL-2 Increased content, decreased IL-4 (P &lt;0.01)</p>                                                                                                                               | Zhang Ya, Yang Lin, Jiang Rongyan, et al..Effect of Astragalus on IL-2, IL-4 and behavioral changes in bronchoalveolar lavage fluid of asthmatic mice.Journal of Taishan Medical College.40,914-916(2019).                                                             |
| 51 | HQi(Selenium-enriched Astragalus extract ) | IL4                  | +1 | <p>Compared with the model group, the levels of IL-2, IL-4, and IFN-<math>\gamma</math> in each intervention group were increased, and the content of TNF-<math>\alpha</math> was decreased, the difference was statistically significant (P &lt;0.05)</p>                                                                                                                                                                                            | Li Qin, fan Qiang, Hu Jihong, et al.Effects of Selenium-enriched Astragalus extract on immunosuppressed cytokines IL-2, IL-4, IFN- $\gamma$ and TNF- $\alpha$ Effects of $\gamma$ and TNF- $\alpha$ .Western Journal of Traditional Chinese Medicine. 31,22-25(2018) . |
| 52 | HQi                                        | IL1A(IL-1 $\alpha$ ) |    |                                                                                                                                                                                                                                                                                                                                                                                                                                                       |                                                                                                                                                                                                                                                                        |
| 53 | HQi(Astragaloside IV)                      | STAT1                | -1 | <p>Astragaloside IV (ASI) can inhibit IFN-<math>\gamma</math>-induced microglial activation, and its mechanism is to inhibit the activation of STAT1 / I<math>\kappa</math>B / NF-<math>\kappa</math>B signaling pathway, and reduce the IL-1<math>\beta</math>, TNF- Gene expression of <math>\alpha</math> and i NOS is related to the reduction of</p>                                                                                             | He Yixin, Shi Hailian, Liu hongshuai,et al.Astragaloside IV regulates STAT1 / I $\kappa$ B / NF- $\kappa$ B signaling pathway to inhibit activation of BV-2 cells.China Journal of Chinese Materia Medica.40,124-128 (2015) .                                          |

|    |                                      |        |    |                                                                                                                                                                                                                                                                                                                                                                                                                                                                                                                            |                                                                                                                                                                                                                                                      |
|----|--------------------------------------|--------|----|----------------------------------------------------------------------------------------------------------------------------------------------------------------------------------------------------------------------------------------------------------------------------------------------------------------------------------------------------------------------------------------------------------------------------------------------------------------------------------------------------------------------------|------------------------------------------------------------------------------------------------------------------------------------------------------------------------------------------------------------------------------------------------------|
| 54 | HQi(Astragalus Polysaccharide)       | EGFR   | -1 | <p>NO and TNF-<math>\alpha</math> production.</p> <p>The research results showed that APS can effectively inhibit the growth and metastasis of Lewis lung cancer in mice, improve immune organ function, inhibit the protein expression of VEGF and EGFR in tumor tissues, and have a concentration-effect relationships.</p> <p>All eight astragalosides studied enhanced epidermal growth factor receptor (EGFR) activity in HaCaT cells. Among them, astragaloside VI (AS-VI) showed the strongest EGFR activation.</p> | <p>Zhao L, Zhong Y, Liang J, et al. Effect of Astragalus Polysaccharide on the Expression of VEGF and EGFR in Mice with Lewis Transplantable Lung Cancer. <i>J Coll Physicians Surg Pak.</i> 29, 392–394(2019).</p>                                  |
| 55 | HQi(Astragaloside IV)                | EGFR   | +1 | <p>Astragaloside IV can significantly down-regulate the phosphorylation levels of EGFR and Akt, and the expression levels of EGFR and Akt total protein remain unchanged</p>                                                                                                                                                                                                                                                                                                                                               | <p>Lee SY, Chang WL, Li ZX, et al. Astragaloside VI and cycloastragenol-6-O-beta-D-glucoside promote wound healing in vitro and in vivo. <i>Phytomedicine.</i> 38,183–191(2018).</p>                                                                 |
| 56 | HQi(Astragaloside IV)                | EGFR   | -1 | <p>mRNA of iNOS (Figure 3A), IL-6 (Figure 3B), TNF-<math>\alpha</math> (Figure 3D), and C-X-C motif chemokine 10 (CXCL10) (Figure 3E) were significantly induced in the Astragalus Polysaccharide(RAP) and LPS treatment group compared with the control group.</p>                                                                                                                                                                                                                                                        | <p>Li Xiao, Zhou Yanyan, song Xiaojie, et al. Effect of Astragaloside IV on Radiosensitivity of Cervical Cancer Cell Lines and Related Mechanisms. <i>Chinese Journal of Basic Medicine in Traditional Chinese Medicine.</i> 24,1540-1543(2018).</p> |
| 57 | HQi(Astragalus Polysaccharide)       | CXCL10 | +1 | <p>Compared with the control group, the Astragalus polysaccharide (APS) group IL 1<math>\beta</math>, IL 2, IL 6, IL 12, TNF <math>\alpha</math>, INF <math>\gamma</math>, Fas, iNOS mRNA expression levels were significantly reduced, IL 4, IL 5, IL 10, TGF <math>\beta</math>, Bcl 2, SOD mRNA expression levels were significantly up-regulated</p>                                                                                                                                                                   | <p>Wei Wei, Zhi-Peng Li, Zhao-Xiang Bian, et al. Astragalus Polysaccharide RAP Induces Macrophage Phenotype Polarization to M1 via the Notch Signaling Pathway. <i>Molecules.</i> 24,(2019).</p>                                                     |
| 58 | HQi(Astragalus polysaccharide (APS)) | SOD1   | +1 | <p>Astragalus polysaccharide treatment and prophylactic</p>                                                                                                                                                                                                                                                                                                                                                                                                                                                                | <p>Chen Wei, Yu Maohua, Liu Fang. Effects of Astragalus Polysaccharides of Gene Expression of Cytokines of NOD Mice's Islets. <i>Fudan University Journal of Medical Sciences.</i> 607-610(2004).</p>                                                |
| 59 | HQi(Astragalus                       | SOD1   | -1 |                                                                                                                                                                                                                                                                                                                                                                                                                                                                                                                            | <p>Lu Chunhua, Ma Yanmei, Wang Hongxia, et al. Protective effect and</p>                                                                                                                                                                             |

|    |                                               |                       |    |                                                                                                                                                                                                                                                                                                                                                                                                                                                                                                                                                                                                                                             |                                                                                                                                                                                                             |
|----|-----------------------------------------------|-----------------------|----|---------------------------------------------------------------------------------------------------------------------------------------------------------------------------------------------------------------------------------------------------------------------------------------------------------------------------------------------------------------------------------------------------------------------------------------------------------------------------------------------------------------------------------------------------------------------------------------------------------------------------------------------|-------------------------------------------------------------------------------------------------------------------------------------------------------------------------------------------------------------|
|    | polysaccharide)                               |                       |    | administration can reduce lung index and reduce lung injury; down-regulate lung MDA level and up-regulate SOD, GSH-Px activity (P <0.05); inhibit TNF- $\alpha$ , IFN- $\alpha$ , IL-6, IL -1 $\beta$ secretion (P <0.05); reduce the expression of Caspase-3, 8, 9 (P <0.05)<br>After 20 g / L Astragalus injection for 0, 6, 12, and 24 hours, the expression of cleared caspase-3 and cleared caspase-9 in human cervical immortalized epithelial cells H8 gradually increased, and the difference was significant (P <0.05) ); The expression of Cleared PARP protein gradually decreased, and the difference was significant (P <0.05) | mechanism of Astragalus polysaccharide treatment and prophylactic administration on PR8 infected mice.Chinese Journal of Immunology. 35,1699-1702+1707(2019).                                               |
| 60 | HQi(Astragalus injection)                     | PARP1                 | -1 |                                                                                                                                                                                                                                                                                                                                                                                                                                                                                                                                                                                                                                             | Lu Ling, Xiao Chenguang, Liu Qing, et al.Effects of astragalus injection on human immortalized cervical epithelial cell apoptosis in vitro.Chinese Journal of Tissue Engineering Research.20,743-747(2016). |
| 61 | HQi                                           | CASP8                 | /  |                                                                                                                                                                                                                                                                                                                                                                                                                                                                                                                                                                                                                                             |                                                                                                                                                                                                             |
| 62 | HQi(the Astragalus polysaccharide (APS) )     | IFNG(IFN - $\gamma$ ) | -1 | Compared with the control group, the Astragalus polysaccharide (APS) group IL 1 $\beta$ , IL 2, IL 6, IL 12, TNF $\alpha$ , INF $\gamma$ , Fas, iNOS mRNA expression levels were significantly reduced, IL 4, IL 5, IL 10, TGF $\beta$ , Bcl 2, SOD mRNA expression levels were significantly up-regulated                                                                                                                                                                                                                                                                                                                                  | Chen Wei, Yu Maohua, Liu Fang.Effects of Astragalus Polysaccharides of Gene Expression of Cytokines of NOD Mice's Islets.Fudan University Journal of Medical Sciences. 607-610(2004).                       |
| 63 | HQi(Cisplatin combined with astragaloside IV) | IFNG(IFN - $\gamma$ ) | +1 | Compared with the control group, the mRNA expression levels of IL 1 $\beta$ , IL 2, IL 6, IL 12, TNF $\alpha$ , INF- $\gamma$ , Fas, iNOS in APS group were significantly down regulated, while the mRNA expression levels of IL 4, IL 5, IL 10, TGF $\beta$ , BCL 2, SOD were significantly up regulated                                                                                                                                                                                                                                                                                                                                   | Liu Tiegang, Wen Chunyan, Shen Xuansan.Effects of cisplatin combined with astragaloside on inflammatory factors and immune function in breast cancer rats.Chinese Journal of Gerontology. 40,863-865(2020). |
| 64 | HQi(Radix                                     | IL2                   | -1 | Radix Astragali significantly attenuated elevated levels                                                                                                                                                                                                                                                                                                                                                                                                                                                                                                                                                                                    | Zhao P, Su G, Xiao X, et al. Chinese medicinal herb Radix Astragali                                                                                                                                         |

|    |                                                |     |    |                                                                                                                                                                                                                                                                                                            |                                                                                                                                                                                                              |
|----|------------------------------------------------|-----|----|------------------------------------------------------------------------------------------------------------------------------------------------------------------------------------------------------------------------------------------------------------------------------------------------------------|--------------------------------------------------------------------------------------------------------------------------------------------------------------------------------------------------------------|
|    | Astragali )                                    |     |    | of the Th1 cytokines (IFN-gamma and IL-2), and increased the Th2 cytokines (IL-4 and IL-10) in autoimmune myocarditis.                                                                                                                                                                                     | suppresses cardiac contractile dysfunction and inflammation in a rat model of autoimmune myocarditis. Toxicol Lett. 182,29–35(2008).                                                                         |
| 65 | HQi(Astragalus polysaccharide (APS) )          | IL2 | -1 | Compared with the control group, the Astragalus polysaccharide (APS) group IL 1 $\beta$ , IL 2, IL 6, IL 12, TNF $\alpha$ , INF $\gamma$ , Fas, iNOS mRNA expression levels were significantly reduced, IL 4, IL 5, IL 10, TGF $\beta$ , Bcl 2, SOD mRNA expression levels were significantly up-regulated | Chen Wei, Yu Maohua, Liu Fang.Effects of Astragalus Polysaccharides of Gene Expression of Cytokines of NOD Mice's Islets.Fudan University Journal of Medical Sciences. 607-610(2004).                        |
| 66 | HQi(Astragalus polysaccharide )                | IL2 | +1 | Yupingfeng polysaccharides and Astragalus polysaccharides enhanced SIgA, IL-2, TGF- $\beta$ 1 and IL-6 levels significantly ( P<0.05 or P<0.01)                                                                                                                                                            | Deng Hua,Yang Hong,Jiang Yan-ping,et al.Regulatory Effects of Yupingfeng Polysaccharides on Intestinal Mucosal Immune Response and Immune Injury in Mice.Chinese Journal of Veterinary Drug. 52,43-48(2018). |
| 67 | HQi(Cisplatin combined with astragaloside IV ) | IL2 | +1 | Cisplatin combined with astragaloside IV is superior to cisplatin alone in the treatment of breast cancer in rats ~ + Level, down-regulate IL-1, IL-6, TNF- $\alpha$ , CD8 ~ + level                                                                                                                       | Liu Tiegang, Wen Chunyan, Shen Xuansan.Effects of cisplatin combined with astragaloside on inflammatory factors and immune function in breast cancer rats.Chinese Journal of Gerontology. 40,863-865(2020).  |
| 68 | HQi(Astragalus )                               | IL2 | +1 | Astragalus intervention mice compared with each group of asthma model mice IL-2 content in alveolar lavage fluid increased, IL-4 content was significantly reduced (P <0.01); Astragalus + hormone intervention group compared with simple hormone group, IL-2 Increased content, decreased IL-4 (P <0.01) | Zhang Ya,Yamg Lin,JIANG Rong-yan,et al.The effect of Astragalus membranaceus on the changes of IL 2, IL 4 and their behavior in BALF of asthmatic mice.Journal of Taishan Medical College. 40,914-916(2019). |
| 69 | HQi(Radix Astragali )                          | IL2 | -1 | Radix Astragali significantly attenuated elevated levels of the Th1 cytokines (IFN-gamma and IL-2), and increased the Th2 cytokines (IL-4 and IL-10) in                                                                                                                                                    | Zhao P, Su G, Xiao X,et al. Chinese medicinal herb Radix Astragali suppresses cardiac contractile dysfunction and inflammation in a rat model of autoimmune myocarditis. Toxicol Lett. 182,29–35(2008).      |

|    |                                       |      |    |                                                                                                                                                                                                                                                                                                                                                          |                                                                                                                                                                                                                                 |
|----|---------------------------------------|------|----|----------------------------------------------------------------------------------------------------------------------------------------------------------------------------------------------------------------------------------------------------------------------------------------------------------------------------------------------------------|---------------------------------------------------------------------------------------------------------------------------------------------------------------------------------------------------------------------------------|
| 70 | HQi(Astragalus polysaccharides )      | IL2  | +1 | <p>autoimmune myocarditis.</p> <p>At most time points, the titer of IBV-specific antibodies, lymphocyte proliferation, and IL-1<math>\beta</math>, IL-2, IL-8, and TNF-<math>\alpha</math> mRNA expression levels were higher in three APS groups than in the vaccine control group, and these increases were dose-dependent.</p>                        | <p>Zhao P, Su G, Xiao X, et al. Chinese medicinal herb Radix Astragali suppresses cardiac contractile dysfunction and inflammation in a rat model of autoimmune myocarditis. <i>Toxicol Lett.</i> 182,29–35(2008).</p>          |
| 71 | HQi(Fufang Huangqi Yiqi oral liquid ) | CAT  | +1 | <p>The content of GSH-Px, SOD and CAT in liver tissue increased significantly, and the amount of MDA production decreased significantly (P &lt;0.05)</p>                                                                                                                                                                                                 | <p>Yan Wenrui, Wang Lingzhi, Hou Lingling, et al. Protective effect of Fufang Huangqi Yiqi oral liquid against acute liver injury induced by AFB1 in rats. <i>Journal of Shanxi Medical University.</i> 50,1435-1439(2019).</p> |
| 72 | HQi(Astragalus polysaccharide )       | IL10 | -1 | <p>Compared with group B (stress group), the expression of NF<math>\kappa</math>B mRNA and IL10 mRNA in thymus and spleen tissues of mice in groups C, D and E (stress + astragalus polysaccharide group) was suppressed (P &lt;0.01)</p>                                                                                                                | <p>Zeng Guangxian, Liu Junying, Xiong Jinrong, et al. Study on effect of Astragalus polysaccharide for traumatic stress mice cell immunity. <i>Chinese Journal of Microbiology and Immunology.</i> 20-23(2004).</p>             |
| 73 | HQi(Astragalus polysaccharide )       | IL10 | +1 | <p>Compared with the control group, the Astragalus polysaccharide (APS) group IL 1<math>\beta</math>, IL 2, IL 6, IL 12, TNF <math>\alpha</math>, INF <math>\gamma</math>, Fas, iNOS mRNA expression levels were significantly reduced, IL 4, IL 5, IL 10, TGF <math>\beta</math>, Bcl 2, SOD mRNA expression levels were significantly up-regulated</p> | <p>Chen Wei, Yu Maohua, Liu Fang. Effects of Astragalus Polysaccharides of Gene Expression of Cytokines of NOD Mice's Islets. <i>Fudan University Journal of Medical Sciences.</i> 607-610(2004).</p>                           |
| 74 | HQi(Radix Astragali )                 | IL10 | +1 | <p>Radix Astragali significantly attenuated elevated levels of the Th1 cytokines (IFN-gamma and IL-2), and increased the Th2 cytokines (IL-4 and IL-10) in autoimmune myocarditis.</p>                                                                                                                                                                   | <p>Zhao P, Su G, Xiao X, et al. Chinese medicinal herb Radix Astragali suppresses cardiac contractile dysfunction and inflammation in a rat model of autoimmune myocarditis. <i>Toxicol Lett.</i> 182,29–35(2008).</p>          |
| 75 | HQi(Astragalus )                      | IL10 | +1 | <p>Astragalus injection can reduce the expression of</p>                                                                                                                                                                                                                                                                                                 | <p>Li Qiang, Qin Yi, Du Qinchuan, et al. Effect of Astragalus Injection</p>                                                                                                                                                     |

|    |                                                       |       |    |                                                                                                                                                                                                                                                                                                                                                  |                                                                                                                                                                                                                       |
|----|-------------------------------------------------------|-------|----|--------------------------------------------------------------------------------------------------------------------------------------------------------------------------------------------------------------------------------------------------------------------------------------------------------------------------------------------------|-----------------------------------------------------------------------------------------------------------------------------------------------------------------------------------------------------------------------|
|    | injection)                                            |       |    | TNF- $\alpha$ around the bleeding focus and increase the expression of IL-10 around the bleeding focus                                                                                                                                                                                                                                           | on the expression of TNF-a and IL-10 around the focal cerebral hemorrhage in rats.Ningxia Medical Journal. 33,105-107+92(2011).                                                                                       |
| 76 | HQi                                                   | HMOX1 | +1 |                                                                                                                                                                                                                                                                                                                                                  |                                                                                                                                                                                                                       |
| 77 | HQi(Astragalus Decoction (AE))                        | BAX   | -1 | To study the effect and mechanism of Astragalus Decoction (AE) on renal tubular cell apoptosis in rats with renal ischemia-reperfusion injury. The expression of Bax and Fas in the AE pretreatment group decreased significantly (P <0.05), while the expression of Bcl-2 increased significantly (P <0.05), so Bax / Bcl-2 decreased (P <0.05) | Zhan Kan,LV Dongning, Tao Zhihu.Effect of Astragalus Decoction on Apoptosis of Renal Tubular Cells in Rats with IR Injury and Its Mechanism Analysis.Guangxi Journal of Traditional Chinese Medicine. 42,39-41(2019). |
| 78 | HQin(Flavonoids: from the extract of Scutellariae)    | PTGS2 | -1 | The expression level of Cox-2 was shown in similar pattern with that of NF $\kappa$ B, and the inhibitory effect was in a dose-dependent manner                                                                                                                                                                                                  | Gong G, Wang H, Kong X, et al. Flavonoids are identified from the extract of Scutellariae Radix to suppress inflammatory-induced angiogenic responses in cultured RAW 264.7 macrophages. Sci Rep. 8,17412(2018).      |
| 79 | HQin(Wogonin, a plant flavone from Scutellaria radix) | PTGS2 | -1 | wogonin at the doses of 250-1000 microg/ear/3 days potently lowered mRNA levels of COX-2 and tumor necrosis factor-alpha with less effect on intercellular adhesion molecule-1 and interleukin-1beta in a sub-chronic skin inflammation model of tetradecanoylphorbol-13-acetate-induced ear edema (multiple treatment).                         | Chi YS, Lim H, Park H, et al. Effects of wogonin, a plant flavone from Scutellaria radix, on skin inflammation: in vivo regulation of inflammation-associated gene expression. Biochem Pharmacol. 66,1271-1278(2003). |
| 80 | HQin(Baicalein)                                       | PTGS2 | -1 | Baicalein can significantly inhibit the production of inflammatory mediators NO and PGE2 and the release of inflammatory factors TNF- $\alpha$ and IL-6, and significantly reduce the expression levels of iNOS and COX-2                                                                                                                        | Zhang Qian, Li Hui-Xiang, Liu Pan,et al.In vitro Anti-inflammatory and Antioxidative Activity of Baicalein.Journal of Yantai University(Natural Science and Engineering Edition).31,232-238(2018).                    |



|    |                                                    |           |    |                                                                                                                                                                                                                                                                                                                                                                                                                                                                                          |                                                                                                                                                                                                                                                                                                                              |
|----|----------------------------------------------------|-----------|----|------------------------------------------------------------------------------------------------------------------------------------------------------------------------------------------------------------------------------------------------------------------------------------------------------------------------------------------------------------------------------------------------------------------------------------------------------------------------------------------|------------------------------------------------------------------------------------------------------------------------------------------------------------------------------------------------------------------------------------------------------------------------------------------------------------------------------|
| 81 | HQin(Flavonoids: from the extract of Scutellariae) | iNOS      | -1 | <p>The expression of LPS-induced iNOS was decreased under application of various concentrations of SR herbal extract, as compared to the control</p>                                                                                                                                                                                                                                                                                                                                     | <p>Gong G, Wang H, Kong X, et al. Flavonoids are identified from the extract of Scutellariae Radix to suppress inflammatory-induced angiogenic responses in cultured RAW 264.7 macrophages. <i>Sci Rep.</i> 8,17412(2018).</p>                                                                                               |
| 82 | HQin(Baicalein)                                    | iNOS      | -1 | <p>Baicalein can significantly inhibit the production of inflammatory mediators NO and PGE2 and the release of inflammatory factors TNF-<math>\alpha</math> and IL-6, and significantly reduce the expression levels of iNOS and COX-2</p>                                                                                                                                                                                                                                               | <p>Zhang Qian, Li Hui-Xiang, Liu Pan, et al. In vitro Anti-inflammatory and Antioxidative Activity of Baicalein. <i>Journal of Yantai University(Natural Science and Engineering Edition).</i> 31,232-238(2018).</p>                                                                                                         |
| 83 | HQin(Heat-Processed Scutellariae Radix)            | RELA(P65) | -1 | <p>The augmented expressions of hepatic oxidative stress and inflammation-related proteins, phospho-p38, phosphorylated extracellular signal-regulated kinase, phosphorylated c-Jun N-terminal kinase, nuclear factor-[Formula: see text] B p65, activator protein-1, cyclooxygenase-2, inducible nitric oxide synthase, MCP-1, intercellular adhesion molecule-1, tumor necrosis factor-[Formula: see text], and IL-6, were downregulated by the heat-processed Scutellariae Radix.</p> | <p>Park CH, Shin MR, An BK, et al. Heat-Processed Scutellariae Radix Protects Hepatic Inflammation through the Amelioration of Oxidative Stress in Lipopolysaccharide-Induced Mice. <i>Am J Chin Med.</i> 45,1233–1252(2017).</p>                                                                                            |
| 84 | HQin(Baicalein)                                    | RELA(P65) | -1 | <p>Moreover, baicalein significantly inhibited reactive oxygen species (ROS) production, decreased cyclooxygenase-2 (COX-2) and nuclear factor-<math>\kappa</math>B (NF-<math>\kappa</math>B)/p65 expression</p>                                                                                                                                                                                                                                                                         | <p>Yan Jiao-Jiao, Du Guan-Hua, Qin Xue-Mei, et al. Baicalein attenuates the neuroinflammation in LPS-activated BV-2 microglial cells through suppression of pro-inflammatory cytokines, COX2/NF-<math>\kappa</math>B expressions and regulation of metabolic abnormality. <i>Int. Immunopharmacol.</i> 79, 106092(2020).</p> |
| 85 | HQin(Heat-Processed)                               | RELA(P65) | -1 | <p>The augmented expressions of hepatic oxidative stress and inflammation-related proteins, phospho-p38,</p>                                                                                                                                                                                                                                                                                                                                                                             | <p>Park CH, Shin MR, An BK, et al. Heat-Processed Scutellariae Radix Protects Hepatic Inflammation through the Amelioration of</p>                                                                                                                                                                                           |

|    |                                           |     |    |                                                                                                                                                                                                                                                                                                                                                                                                                                                                                                                                                                                                                                                                                                                                                                                                                                                                               |                                                                                                                                                                                                                                                                                                                                                                                                                  |
|----|-------------------------------------------|-----|----|-------------------------------------------------------------------------------------------------------------------------------------------------------------------------------------------------------------------------------------------------------------------------------------------------------------------------------------------------------------------------------------------------------------------------------------------------------------------------------------------------------------------------------------------------------------------------------------------------------------------------------------------------------------------------------------------------------------------------------------------------------------------------------------------------------------------------------------------------------------------------------|------------------------------------------------------------------------------------------------------------------------------------------------------------------------------------------------------------------------------------------------------------------------------------------------------------------------------------------------------------------------------------------------------------------|
|    | Scutellariae Radix)                       |     |    | phosphorylated extracellular signal-regulated kinase, phosphorylated c-Jun N-terminal kinase, nuclear factor-[Formula: see text] B p65, activator protein-1, cyclooxygenase-2, inducible nitric oxide synthase, MCP-1, intercellular adhesion molecule-1, tumor necrosis factor-[Formula: see text], and IL-6, were downregulated by the heat-processed Scutellariae Radix.                                                                                                                                                                                                                                                                                                                                                                                                                                                                                                   | Oxidative Stress in Lipopolysaccharide-Induced Mice. <i>Am J Chin Med.</i> 45,1233–1252(2017).                                                                                                                                                                                                                                                                                                                   |
| 86 | HQin(Baicalein)                           | TNF | -1 | Baicalin may play a protective role in pancreatic tissue by reducing the production and release of TNF- $\alpha$ and IL-6, and down-regulating TNF- $\alpha$ / IL-10.<br><br>After treatment with BA and BA-NL, the positive expression of macrophages and neutrophils in the liver of the mice was significantly reduced compared with the MCD group. The expression of m RNA of molecules (ICAM, ECAM, ELAM) and chemokines (CCL2, CXCL2) was significantly reduced, and the expression of TLR4, NF- $\kappa$ B, P-P65, P-P38 protein in liver tissue decreased<br><br>In HMC-1 cells, SB restored IL-8 and TNF- $\alpha$ expression and inhibited MAP kinase expression in compound 48/80-induced HMC-1 cells. These data suggest that SB may prove to be a useful anti-inflammatory agent through its downregulation of the expression of various inflammatory mediators. | Li Huiyan, Zhao Shuguang, Zhao Baomin, et al. Effects of baicalin on TNF- $\alpha$ , IL-6 and IL-10 in rats with severe acute pancreatitis. <i>Medical Journal of National Defending Forces in Southwest China.</i> 32-35(2009).<br><br>Yuan Yinglin. Baicalin nanoliposomes ameliorated non-alcoholic fatty liver disease by suppression TLR4 signaling pathway in mice[D].Chongqing Medical University.(2017). |
| 87 | HQin(Baicalin and Baicalin nanoliposomes) | TNF | -1 |                                                                                                                                                                                                                                                                                                                                                                                                                                                                                                                                                                                                                                                                                                                                                                                                                                                                               |                                                                                                                                                                                                                                                                                                                                                                                                                  |
| 88 | HQin(Scutellaria baicalensis)             | TNF | +1 |                                                                                                                                                                                                                                                                                                                                                                                                                                                                                                                                                                                                                                                                                                                                                                                                                                                                               | Jung HS, Kim MH, Gwak NG, et al. Antiallergic effects of <i>Scutellaria baicalensis</i> on inflammation in vivo and in vitro. <i>J Ethnopharmacol.</i> 141,345–349(2012).                                                                                                                                                                                                                                        |

|    |                                                           |     |    |                                                                                                                                                                                                                                                                                                                                                                                                                                                                                                                                                                                                                                                                                                                                                                                                                                                                                                             |                                                                                                                                                                                                                                                                                                                                                                                                                                                                                                                                                                          |
|----|-----------------------------------------------------------|-----|----|-------------------------------------------------------------------------------------------------------------------------------------------------------------------------------------------------------------------------------------------------------------------------------------------------------------------------------------------------------------------------------------------------------------------------------------------------------------------------------------------------------------------------------------------------------------------------------------------------------------------------------------------------------------------------------------------------------------------------------------------------------------------------------------------------------------------------------------------------------------------------------------------------------------|--------------------------------------------------------------------------------------------------------------------------------------------------------------------------------------------------------------------------------------------------------------------------------------------------------------------------------------------------------------------------------------------------------------------------------------------------------------------------------------------------------------------------------------------------------------------------|
| 89 | HQin(Scutellaria baicalensis water Extraction)            | IL6 | -1 | <p>Compared with the model group, the expression of IL-6 mRNA in the jejunum of mice in each dose group of Scutellaria baicalensis water Extraction decreased significantly (P &lt;0.01)</p> <p>Scutellaria can significantly reduce the content of serum TNF-<math>\alpha</math>, IL-1, IL-6 on the third day after infection, and can increase the content of IFN-<math>\gamma</math> in each phase after infection, and increase IL-10 on the first 1 to 5 days after infection content</p>                                                                                                                                                                                                                                                                                                                                                                                                              | <p>Liu Xiaoxi, Dong Jie, Li Minxia, et al. Effect of the Scutellaria baicalensis Water Extraction on the Regulation of Jejunum Damage and Repair in the Model of Enteritis Mice[J/OL]. Chinese Journal of Animal and Veterinary Sciences. 392-398 (2020).</p> <p>Li Yali, Xu Hongri, Cao Hongyun, et al. Study on the Mechanism of Anti-influenza of Five Kinds of Heat-clearing and Detoxifying Drugs from the Perspective of Immunoinflammatory Injury and Its Clinical Significance. Journal of Emergency in Traditional Chinese Medicine. 29, 189-192+205(2020).</p> |
| 90 | HQin(Scutellaria a)                                       | IL6 | -1 |                                                                                                                                                                                                                                                                                                                                                                                                                                                                                                                                                                                                                                                                                                                                                                                                                                                                                                             |                                                                                                                                                                                                                                                                                                                                                                                                                                                                                                                                                                          |
| 91 | HQin(Flavonoids :from the extract of Scutellariae Radix ) | IL6 | -1 | <p>The mRNAs encoding IL-1<math>\beta</math>, IL-6 and TNF-<math>\alpha</math> were restrained upon the SR treatment. The SR herbal extract (1 mg/mL) showed the strongest inhibition, i.e. ~50% for IL-1<math>\beta</math>, ~60% for IL-6 and ~60% for TNF-<math>\alpha</math></p> <p>Baicalein can significantly inhibit the production of inflammatory mediators NO and PGE2 and the release of inflammatory factors TNF-<math>\alpha</math> and IL-6, and significantly reduce the expression levels of iNOS and COX-2</p> <p>The augmented expressions of hepatic oxidative stress and inflammation-related proteins, phospho-p38, phosphorylated extracellular signal-regulated kinase, phosphorylated c-Jun N-terminal kinase, nuclear factor-[Formula: see text] B p65, activator protein-1, cyclooxygenase-2, inducible nitric oxide synthase, MCP-1, intercellular adhesion molecule-1, tumor</p> | <p>Gong G, Wang H, Kong X, et al. Flavonoids are identified from the extract of Scutellariae Radix to suppress inflammatory-induced angiogenic responses in cultured RAW 264.7 macrophages. Sci Rep. 8, 17412(2018).</p> <p>Zhang Qian, Li Hui-Xiang, Liu Pan, et al. In vitro Anti-inflammatory and Antioxidative Activity of Baicalein. Journal of Yantai University(Natural Science and Engineering Edition). 31, 232-238(2018).</p>                                                                                                                                  |
| 92 | HQin(Baicalein)                                           | IL6 | -1 |                                                                                                                                                                                                                                                                                                                                                                                                                                                                                                                                                                                                                                                                                                                                                                                                                                                                                                             |                                                                                                                                                                                                                                                                                                                                                                                                                                                                                                                                                                          |
| 93 | HQin(Heat-Processed Scutellariae Radix)                   | IL6 | -1 |                                                                                                                                                                                                                                                                                                                                                                                                                                                                                                                                                                                                                                                                                                                                                                                                                                                                                                             | <p>Park CH, Shin MR, An BK, et al. Heat-Processed Scutellariae Radix Protects Hepatic Inflammation through the Amelioration of Oxidative Stress in Lipopolysaccharide-Induced Mice. Am J Chin Med. 45, 1233–1252(2017).</p>                                                                                                                                                                                                                                                                                                                                              |

|    |                                           |                        |    |                                                                                                                                                                                                                                                                                                                                                                                                                                                                                                                               |                                                                                                                                                                                                                                                                                                                                                                                                                                              |
|----|-------------------------------------------|------------------------|----|-------------------------------------------------------------------------------------------------------------------------------------------------------------------------------------------------------------------------------------------------------------------------------------------------------------------------------------------------------------------------------------------------------------------------------------------------------------------------------------------------------------------------------|----------------------------------------------------------------------------------------------------------------------------------------------------------------------------------------------------------------------------------------------------------------------------------------------------------------------------------------------------------------------------------------------------------------------------------------------|
| 94 | HQin(Baicalin and Baicalin nanoliposomes) | IL6                    | -1 | <p>necrosis factor-[Formula: see text], and IL-6, were downregulated by the heat-processed <i>Scutellariae Radix</i>.</p> <p>After treatment with BA and BA-NL, the positive expression of macrophages and neutrophils in the liver of the mice was significantly reduced compared with the MCD group. The expression of mRNA of molecules (ICAM, ECAM, ELAM) and chemokines (CCL2, CXCL2) was significantly reduced, and the expression of TLR4, NF-<math>\kappa</math>B, P-P65, P-P38 protein in liver tissue decreased</p> | <p>Yuan Yinglin. Baicalin nanoliposomes ameliorated non-alcoholic fatty liver disease by suppression TLR4 signaling pathway in mice[D].Chongqing Medical University. (2017).</p>                                                                                                                                                                                                                                                             |
| 95 | HQin( <i>Scutellaria</i> )                | MAPK14 (P38 $\alpha$ ) | -1 | <p>It is speculated that the anti-inflammatory substances in <i>Scutellaria baicalensis</i> reduce the release of pro-inflammatory cytokines such as IL-<math>\beta</math> and TNF-<math>\alpha</math> by inhibiting the MAPK14 gene, thereby exerting an anti-inflammatory effect</p>                                                                                                                                                                                                                                        | <p>1) Kong T T, Zhang C M, Liu Z P. Recent developments of p38<math>\alpha</math> MAP kinase inhibitors as antiinflammatory agents based on the imidazole scaffolds . <i>Curr Med Chem.</i> 20, 1997-2016(2013).<br/>2) Liu Yu. Study on the Analgesia,Healing and anti-inflammatory Mechanisms of Simiaojunyi ointment based on the Neuroendocrine-immunoregulatory Network [D]. Changsha:Hunan University Of Chinese Medicine. (2016).</p> |
| 96 | HQin(Baicalein)                           | CASP3                  | -1 | <p>Baicalein can inhibit the oxidative stress response of adrenal epithelial cells, and by down-regulating the level of phosphorylated Caspase-3 protein, thereby inhibiting apoptosis and reducing cell damage</p>                                                                                                                                                                                                                                                                                                           | <p>Guo Yaju, Zhang Yongjun, Song Shuxian.Effect of baicalein on H2O2-induced apoptosis of renal tubular epithelial cells.<i>Journal of Clinical and Experimental Medicine.</i> 17,2053-2056(2018).</p>                                                                                                                                                                                                                                       |
| 97 | HQin(Baicalein)                           | CASP3                  | +1 | <p>caspase-3 caspase-9 increased expression in vivo and in vitro after baicalin treatment</p>                                                                                                                                                                                                                                                                                                                                                                                                                                 | <p>Baicalin induces apoptosis of gallbladder carcinoma cells in vitro via a mitochondrial-mediated pathway and suppresses tumor growth in vivo.</p>                                                                                                                                                                                                                                                                                          |
| 98 | HQin(wogonin,                             | PTGS1(C                | +1 | <p>When applied topically on the intact skin, only a high</p>                                                                                                                                                                                                                                                                                                                                                                                                                                                                 | <p>Chi YS, Lim H, Park H, et al. Effects of wogonin, a plant flavone</p>                                                                                                                                                                                                                                                                                                                                                                     |

|     |                                                                  |                    |    |                                                                                                                                                                                                                                                                                                                                                                                                                                                                                                                                                                                                                                                                                                                       |                                                                                                                                                                                                                                                                                          |
|-----|------------------------------------------------------------------|--------------------|----|-----------------------------------------------------------------------------------------------------------------------------------------------------------------------------------------------------------------------------------------------------------------------------------------------------------------------------------------------------------------------------------------------------------------------------------------------------------------------------------------------------------------------------------------------------------------------------------------------------------------------------------------------------------------------------------------------------------------------|------------------------------------------------------------------------------------------------------------------------------------------------------------------------------------------------------------------------------------------------------------------------------------------|
|     | a plant flavone from <i>Scutellaria radix</i> )                  | OX1)               |    | dose treatment of wogonin (1000 microg/ear/3 days) slightly increased COX-1 and fibronectin mRNA.                                                                                                                                                                                                                                                                                                                                                                                                                                                                                                                                                                                                                     | from <i>Scutellaria radix</i> , on skin inflammation: in vivo regulation of inflammation-associated gene expression. <i>Biochem Pharmacol.</i> 66,1271–1278(2003).                                                                                                                       |
| 99  | HQin(Baicalin and Baicalin nanoliposomes)                        | ICAM1              | -1 | After treatment with BA and BA-NL, the positive expression of macrophages and neutrophils in the liver of the mice was significantly reduced compared with the MCD group. The expression of mRNA of molecules (ICAM, ECAM, ELAM) and chemokines (CCL2, CXCL2) was significantly reduced, and the expression of TLR4, NF- $\kappa$ B, P-P65, P-P38 protein in liver tissue decreased<br>The results of the research on the mechanism of Huangqin Decoction's effective part formula in the treatment of UC rats showed that the content of IL-1 $\beta$ in the peripheral blood of UC rats was significantly increased, further confirming the important role of IL-1 $\beta$ in the development of ulcerative colitis | Yuan Yinglin. Baicalin nanoliposomes ameliorated non-alcoholic fatty liver disease by suppression TLR4 signaling pathway in mice[D].Chongqing Medical University. (2017).                                                                                                                |
| 100 | HQin(Huangqin Decoction)                                         | IL1B(IL1 $\beta$ ) | +1 | The mRNAs encoding IL-1 $\beta$ , IL-6 and TNF- $\alpha$ were restrained upon the SR treatment. The SR herbal extract (1 mg/mL) showed the strongest inhibition, i.e.~50% for IL-1 $\beta$ , ~60% for IL-6 and ~60% for TNF- $\alpha$                                                                                                                                                                                                                                                                                                                                                                                                                                                                                 | Ding Xiaogang. Experimental Study on Anti-ulcerative Colitis in Rats Treated by Effective Components of Huangqin Decoction[D].Beijing University of Chinese Medicine.(2003).                                                                                                             |
| 101 | HQin(Flavonoids :from the extract of <i>Scutellariae Radix</i> ) | IL1B(IL1 $\beta$ ) | -1 | There were increases (P < 0.05) in the relative expression of ileal IFNG, TNFA, IL8, and IL1B at 3 DPI of layers in response to <i>S. pullorum</i> challenge (Figure 1). However, they were all decreased (P < 0.05)                                                                                                                                                                                                                                                                                                                                                                                                                                                                                                  | Gong G, Wang H, Kong X, et al. Flavonoids are identified from the extract of <i>Scutellariae Radix</i> to suppress inflammatory-induced angiogenic responses in cultured RAW 264.7 macrophages. <i>Sci Rep.</i> 8, 17412(2018).                                                          |
| 102 | HQin(Extracts From Flos <i>Ionicerae</i> in Combination          | IL1B(IL1 $\beta$ ) | -1 |                                                                                                                                                                                                                                                                                                                                                                                                                                                                                                                                                                                                                                                                                                                       | Wang W, Jia H., Zhang H., et al. Supplemental Plant Extracts From Flos <i>Ionicerae</i> in Combination With Baikal skullcap Attenuate Intestinal Disruption and Modulate Gut Microbiota in Laying Hens Challenged by <i>Salmonella pullorum</i> . <i>Frontiers in Microbiology</i> , 10. |

|     |                                           |             |    |                                                                                                                                                                                                                                                                                                                                                                                                                                                                                                                                                                                                  |                                                                                                                                                                                                                   |
|-----|-------------------------------------------|-------------|----|--------------------------------------------------------------------------------------------------------------------------------------------------------------------------------------------------------------------------------------------------------------------------------------------------------------------------------------------------------------------------------------------------------------------------------------------------------------------------------------------------------------------------------------------------------------------------------------------------|-------------------------------------------------------------------------------------------------------------------------------------------------------------------------------------------------------------------|
|     | With Baikal skullcap)                     |             |    | in layers of T group when compared with those in PC group. Furthermore, an up-regulation (P < 0.05) in the relative expression of ileal IL10 at 3 DPI was observed in the birds from T group relative to PC group.<br>After treatment with BA and BA-NL, the positive expression of macrophages and neutrophils in the liver of the mice was significantly reduced compared with the MCD group. The expression of mRNA of molecules (ICAM, ECAM, ELAM) and chemokines (CCL2, CXCL2) was significantly reduced, and the expression of TLR4, NF-κB, P-P65, P-P38 protein in liver tissue decreased |                                                                                                                                                                                                                   |
| 103 | HQin(Baicalin and Baicalin nanoliposomes) | IL1B(IL1 β) | -1 | Baicalin has a strong effect on inducing apoptosis in human liver cancer HepG-2 cells, and its mechanism may be related to the down-regulation of P53 gene expression and the reduction of Bcl-2 / Bax ratio<br>In the SAP + baicalein group, the levels of serum amylase, IL-6, TNF-α, MDA content in the lung tissue and apoptosis index decreased, SOD activity increased, Bax and p-p38MAPK in the lung tissue of the rats in the SAP and baicalein group Decreased protein expression, increased Bcl-2 protein expression (P <0.05)                                                         | Yuan Yinglin. Baicalin nanoliposomes ameliorated non-alcoholic fatty liver disease by suppression TLR4 signaling pathway in mice[D].Chongqing Medical University. (2017).                                         |
| 104 | HQin(Baicalin)                            | TP53 (P53)  | -1 | The protective effect of baicalin on SH-SY5Y cell damage induced by H2O2 may be related to baicalin up-regulating the expression of Bcl-2 and Bcl-xL to                                                                                                                                                                                                                                                                                                                                                                                                                                          | Meng Lu, Zhang Xuewu, Li Zhenglu. Experimental Study on Anti-ulcerative Colitis in Rats Treated by Effective Components of Huangqin Decoction. Lishizhen Medicine and Materia Medica Research.21,2212-2213(2010). |
| 105 | HQin(Baicalein)                           | BCL2        | +1 |                                                                                                                                                                                                                                                                                                                                                                                                                                                                                                                                                                                                  | Zhu Xiaolin, Zhao Haiyan, Yang Jilin.Effects of baicalein on lung tissue injury in rats with severe acute pancreatitis[J/OL].Journal of Zhengzhou University(Medical Sciences). 37-40(2020).                      |
| 106 | HQin(Baicalin)                            | BCL2        | +1 |                                                                                                                                                                                                                                                                                                                                                                                                                                                                                                                                                                                                  | Yan Ming, Li Hongzhi, Liu Jieting, et al.Effects of Baicalin on Bcl-2 and Bcl-xL mRNA Expression Against SH-SY5Y Cells Apoptosis.Herald of Medicine. 31,843-845(2012).                                            |

|     |                               |                      |    |                                                                                                                                                                                                                                                                                                                            |                                                                                                                                                                                                                                   |
|-----|-------------------------------|----------------------|----|----------------------------------------------------------------------------------------------------------------------------------------------------------------------------------------------------------------------------------------------------------------------------------------------------------------------------|-----------------------------------------------------------------------------------------------------------------------------------------------------------------------------------------------------------------------------------|
| 107 | HQin(Baicalein)               | BCL2                 | -1 | <p>play an anti-apoptotic role.</p> <p>After 20, 40 and 80 <math>\mu\text{mol} / \text{L}</math> baicalein treatment for 24 h, the expression of pro-apoptotic protein Bax in ovarian cancer HO-8910 cells was significantly increased, while the expression of anti-apoptotic protein Bcl-2 was significantly reduced</p> | <p>Huang Yan, Fu Jingli. Baicalein induces apoptosis in human ovarian cancer HO-8910 cells by activating Caspase and Bcl-2 family proteins. <i>Chinese Traditional and Herbal Drugs</i>.50,2620-2624(2019).</p>                   |
| 108 | HQin(Baicalin)                | TGFB1(TGF $\beta$ 1) | -1 | <p>Baicalin down-regulates miR-21 expression of RA synovial fibroblasts, promotes the expression of Smad7 protein, and then inhibits the expression of TGF-<math>\beta</math>1, thereby reducing the excessive secretion of synthetic extracellular matrix by RA synovial fibroblasts.</p>                                 | <p>Duan Haizheng, Bai Lin, Bai Ya, et al. Study on the molecular mechanism of baicalin on alleviating synthesis of extracellular matrix of HFLS-RA. <i>Lishizhen Medicine and Materia Medica Research</i>.30,1299-1302(2019).</p> |
| 109 | HQin(Wogonoside)              | MAPK1                | -1 | <p>wogonoside down-regulates miR-21 expression of RA synovial fibroblasts, promotes the expression of Smad7 protein, and then inhibits the expression of TGF-<math>\beta</math>1, thereby reducing the excessive secretion of synthetic extracellular matrix by RA synovial fibroblasts.</p>                               | <p>Song Yan, Gong Rui, Yang Bo et al. Effects of wogonoside on anoxia-reoxygenation induced H9c2 myocardial cells injury and expression of P38 and ERK1/2. <i>Medical Journal of West China</i>.31,1820-1825(2019).</p>           |
| 110 | HQin(Scutellaria Decoction)   | CXCL8 (IL8)          | -1 | <p>Serum level of IL-6, IL-8 and MTV in the observation group</p> <p>All are significantly lower than the control group (<math>P &lt; 0.01</math>)</p>                                                                                                                                                                     | <p>Wang Jinling. Study on the Effect of Scutellaria Decoction and the Changes of Serum IL-6 IL-8 and MVD and the Quality of Life in Patients with Gastric Cancer. <i>Hebei Medicine</i>,23,679-682(2017).</p>                     |
| 111 | HQin(Scutellaria baicalensis) | CXCL8 (IL8)          | +1 | <p>In HMC-1 cells, SB restored IL-8 and TNF-<math>\alpha</math> expression and inhibited MAP kinase expression in compound 48/80-induced HMC-1 cells. These data suggest that SB may prove to be a useful anti-inflammatory agent through its downregulation of the expression of various inflammatory mediators.</p>      | <p>Jung HS, Kim MH, Gwak NG, et al. Antiallergic effects of Scutellaria baicalensis on inflammation in vivo and in vitro. <i>J Ethnopharmacol</i>. 141,345–349(2012).</p>                                                         |

|     |                                                |       |    |                                                                                                                                                                                                                                                                                                                                                                                                                                                                                                                                                                                                                                                                                                |                                                                                                                                                                                                                                              |
|-----|------------------------------------------------|-------|----|------------------------------------------------------------------------------------------------------------------------------------------------------------------------------------------------------------------------------------------------------------------------------------------------------------------------------------------------------------------------------------------------------------------------------------------------------------------------------------------------------------------------------------------------------------------------------------------------------------------------------------------------------------------------------------------------|----------------------------------------------------------------------------------------------------------------------------------------------------------------------------------------------------------------------------------------------|
| 112 | HQin(Baicalin Oral Sustained Release Membrane) | CRP   | -1 | <p>Compared with the control group, the test group had lower levels of CRP, TNF-<math>\alpha</math>, and IL-6</p> <p>The augmented expressions of hepatic oxidative stress and inflammation-related proteins, phospho-p38, phosphorylated extracellular signal-regulated kinase, phosphorylated c-Jun N-terminal kinase, nuclear factor-[Formula: see text] B p65, activator protein-1, cyclooxygenase-2, inducible nitric oxide synthase, MCP-1, intercellular adhesion molecule-1, tumor necrosis factor-[Formula: see text], and IL-6, were downregulated by the heat-processed Scutellariae Radix.</p>                                                                                     | <p>Guo Changqing.Effect of Baicalin Oral Sustained Release Membrane Combined with Minocycline on Inflammatory Indicators in Patients with Type 2 Diabetic Periodontitis.Guangming Journal of Chinese Medicine. 34,3801-3803(2019).</p>       |
| 113 | HQin(Heat-Processed Scutellariae Radix)        | CCL2  | -1 | <p>Baicalin induces apoptosis of human hepatocellular carcinoma HepG2 cells by activating JNK signaling pathway</p>                                                                                                                                                                                                                                                                                                                                                                                                                                                                                                                                                                            | <p>Park CH, Shin MR, An BK, et al. Heat-Processed Scutellariae Radix Protects Hepatic Inflammation through the Amelioration of Oxidative Stress in Lipopolysaccharide-Induced Mice. Am J Chin Med. 45,1233–1252(2017).</p>                   |
| 114 | HQin(Baicalin)                                 | MAPK8 | +1 | <p>The relative expression levels of various indexes in the baicalin treatment and preventive administration groups were PERK (<math>1.53 \pm 0.09</math>, <math>1.96 \pm 0.21</math>), CHOP (<math>2.10 \pm 0.26</math>, <math>2.75 \pm 0.12</math>), pJNK (<math>2.57 \pm 0.33</math>, <math>3.42 \pm 0.34</math>) and Caspase-12 (<math>1.75 \pm 0.21</math>, <math>2.44 \pm 0.38</math>), compared with the PR8 group (<math>2.86 \pm 0.23</math>, <math>4.75 \pm 0.38</math>, <math>5.02 \pm 0.49</math>, <math>3.64 \pm 0.36</math>), the expression level decreased significantly (<math>F = 135.340</math>, <math>P &lt; 0.01</math>; <math>F = 74.100</math>, <math>P &lt;</math></p> | <p>Zhou Shu, Cai Tao, Qin Xinggui et al.Effect of JNK Signal Transduction of Pathway on Apoptosis Induced by Baicalin in Hepatoma Carcinoma Cells.Medical &amp; Pharmaceutical Journal of Chinese People's Liberation Army. 20-23(2015).</p> |
| 115 | HQin(Baicalin)                                 | MAPK8 | -1 |                                                                                                                                                                                                                                                                                                                                                                                                                                                                                                                                                                                                                                                                                                | <p>Wu Tong, Niu Shuli, Bai Mei.Effects of a baicalin intervention on endoplasmic reticulum stress in response to infection with the PR8 strain of influenza virus.Journal of Pathogen Biology. 12,553-556,559(2017).</p>                     |



|     |                                              |                     |    |                                                                                                                                                                                                                                                                                                                                                                                                                                                                                                                                                                                                                                                        |                                                                                                                                                                                                                                           |
|-----|----------------------------------------------|---------------------|----|--------------------------------------------------------------------------------------------------------------------------------------------------------------------------------------------------------------------------------------------------------------------------------------------------------------------------------------------------------------------------------------------------------------------------------------------------------------------------------------------------------------------------------------------------------------------------------------------------------------------------------------------------------|-------------------------------------------------------------------------------------------------------------------------------------------------------------------------------------------------------------------------------------------|
| 116 | HQin(Baicalein)                              | FOS(C-FOS)          | -1 | 0.01).<br>Baicalein co-acted for 1 h, can down-regulate the expression of c-FOS, CTGF, CYR61, and EGR1 downstream of estrogen-induced GPR30 in MCF-10A cells; similarly, baicalein can also inhibit estrogen up-regulation of target gene c- in MCF-12A cells. MRNA levels of FOS and CYR61.<br>Baicalin 750 and 375 mg.kg-1 doses can significantly reduce the inflammatory damage of lung tissue; significantly reduce the expression of c-jun and c-fosmRNA (P <0.05, P <0.01), significantly reduce c-jun and phosphorylation c-jun protein expression (P <0.01); significantly inhibits the secretion of TNF- $\alpha$ and IL-1 $\beta$ (P <0.01) | Wang Jing.baicalein has protective effects on the 17 $\beta$ -estradiol-induced transformation of breast epithelial cells by interfering with estrogen receptor 30-mediated signaling transduction[D].Guizhou Medical University. (2017). |
| 117 | HQin(Baicalin )                              | FOS(C-FOS)          | -1 | Baicalin not only significantly inhibits the secretion of INF- $\gamma$ and IL-2 factors by Th1-type cells, but also significantly promotes the secretion of IL-4 and IL-10 factors by Th2-type cells, which makes Th2 in the immune microenvironment The overall level of type cytokines is up-regulated, which promotes the Th1 / Th2 balance to develop towards Th2 type                                                                                                                                                                                                                                                                            | Wan Qiaofeng, Gu Ligang, Yin Shengjun,et al.Mechanism of Baicalin on lung tissue injury of mice with FM1 induced pneumonia.Chinese Pharmacological Bulletin.28,208-212(2012).                                                             |
| 118 | HQin(Baicalin )                              | IL4                 | +1 |                                                                                                                                                                                                                                                                                                                                                                                                                                                                                                                                                                                                                                                        | Ma Yannan, Yang Xiaoqi, Ma Xiaojun et al.Effect of the Baicalin on recurrent spontaneous abortion mouse model of maternal fetal immune microenvironment.Journal of Changchun University of Chinese Medicine. 34,627-630(2018).            |
| 119 | HQin                                         | IL1AIL-1 $\alpha$ ) | /  |                                                                                                                                                                                                                                                                                                                                                                                                                                                                                                                                                                                                                                                        |                                                                                                                                                                                                                                           |
| 120 | HQin(scutellaria baicalensis stem-leaf total | STAT1               | -1 | scutellaria baicalensis stem-leaf total flavonoids (SSTF) may have a certain preventive effect on apoptosis during myocardial ischemia-reperfusion injury by                                                                                                                                                                                                                                                                                                                                                                                                                                                                                           | Yu Xiaomin, Hao Xiangjun, Gong Mingyu.Protective effect and mechanism of scutellaria baicalensis stem-leaf total flavonoids on myocardial ischemia-reperfusion apoptosis in rats.Chinese Journal                                          |

|     |                                                                 |        |    |                                                                                                                                                                                                                                                                                                                                                                                                                                                                                  |                                                                                                                                                                                                    |
|-----|-----------------------------------------------------------------|--------|----|----------------------------------------------------------------------------------------------------------------------------------------------------------------------------------------------------------------------------------------------------------------------------------------------------------------------------------------------------------------------------------------------------------------------------------------------------------------------------------|----------------------------------------------------------------------------------------------------------------------------------------------------------------------------------------------------|
|     | flavonoids (SSTF)                                               |        |    | down-regulating STAT1 protein and up-regulating STAT3 protein expression                                                                                                                                                                                                                                                                                                                                                                                                         | of Gerontology. 33,3132-3134(2013).                                                                                                                                                                |
| 121 | HQin(scutellaria baicalensis stem-leaf total flavonoids (SSTF)) | STAT1  | -1 | scutellaria baicalensis stem-leaf total flavonoids (SSTF) can prevent JAK2 and STAT1 protein expression and up-regulate STAT3 protein expression by prophylactic medication. Among them, SSTFII and III groups have better protective effect than SSTFI group, and SSTFII and III groups have an effect on injured myocardium. No obvious difference in protection                                                                                                               | Yu Xiaomin. Intervention of scutellaria baicalensis stem-leaf total flavonoids on myocardial ischemia and reperfusion JAK / STAT pathway in rats[D].Chengde Medical College.(2012).                |
| 122 | HQin(Baicalein)                                                 | EGFR   | -1 | Different concentrations of baicalein (10 μM, 20 μM, 40 μM, and 80 μM) after 24 h of U251 cells significantly inhibited the phosphorylation of protein EGFR and Akt in U251 cells, and blocked the promoting effect of hEGF on it. More obvious                                                                                                                                                                                                                                  | Yuelinlin. Baicalein suppresses hEGF-induced proliferation and migration of glioma cells via the EGFR / Akt signaling pathway[D].Qingdao University. (2017).                                       |
| 123 | HQin(Skutellaria extract SBX)                                   | EGFR   | +1 | Protein Pathway Array technology was used to analyze the effect of SBX on H1975 protein expression. A total of 166 phosphorylated and non-phosphorylated proteins were detected, 53 of which were expressed, and 15 differentially expressed proteins. Among them, Cdk6, EGFR, Survivin and mTor protein expression levels were up-regulated, while p27, p-RB, Cyclin D1, Cyclin E, XIAP, p53, p-p53, p-AKT, Akt, Notch4 and Cdk4 protein expression levels were down regulated. | Liu Xiao-liang, Zhao Xin, Han Wei,et al.Influence of Skutellaria extract SBX on NSCLC cell proliferation and signaling networks.Chinese Journal of Cancer Prevention and Treatment.21,25-28(2014). |
| 124 | HQin(Baicalin)                                                  | CXCL10 | -1 | Fluorescence real-time quantitative PCR detection showed that the expression of CXCL9, CXCL10, CXCR3 and RAB27A in the halide group and 5%                                                                                                                                                                                                                                                                                                                                       | Zhu Yiping,Jin Rong, Wang Suiquan,et al.Effect of baicalin on vitiligo mice induced by monobenzone.Chinese Journal of Clinical Pharmacology and Therapeutics.22,27-32(2017).                       |

|     |                                                        |       |    |                                                                                                                                                                                                                                                                                                                                                                                                                                                                                                              |                                                                                                                                                                                                                                        |
|-----|--------------------------------------------------------|-------|----|--------------------------------------------------------------------------------------------------------------------------------------------------------------------------------------------------------------------------------------------------------------------------------------------------------------------------------------------------------------------------------------------------------------------------------------------------------------------------------------------------------------|----------------------------------------------------------------------------------------------------------------------------------------------------------------------------------------------------------------------------------------|
| 125 | HQin(Scutellaria baicalensis)                          | SOD1  | +1 | baicalin group was significantly lower than that in the model group, while PI3K was significantly increased. Biochemical index test results showed that baicalin can significantly increase the content of antioxidant enzymes SOD and CAT in Drosophila (P <0.05 or P <0.01); RT-PCR results showed that baicalin significantly up-regulated antioxidant enzymes in Drosophila. Related gene SOD1, SOD2 and CAT expression levels (P <0.01 or P <0.001) and down-regulated MTH expression levels (P <0.001) | Xue Liying. Study on Screening and Mechanism of anti-aging Effective Ingredients of Scutellaria baicalensis Georgi[D].Shanxi University.(2018).                                                                                        |
| 126 | HQin(Scutellaria flavonoids bw-lzj-6504, bw-lzj-6517a) | PARP1 | -1 | Scutellaria flavonoids bw-lzj-6504, bw-lzj-6517a can significantly reduce PARP1, caspase-3 protein levels. After 48 hours of 50 and 100 µg / mL baicalin, the expression levels of Parp-1 and caspase 3 spiroosomal protein were significantly higher than those of the control group (all P values <0.01), while XIAP, NF-κB and Bcl-2. The level of protein expression was significantly reduced (all P values <0.05)                                                                                      | Nie Mingxiu, Zhang Hongxiu, Jiang Liping, et al. Scutellaria flavonoids bw-lzj-6504 and bw-lzj-6517a inhibit proliferation of renal clear cell carcinoma cells in vitro. Chinese Journal of Cellular and Molecular Immunology. (2016). |
| 127 | HQin(Baicalin)                                         | PARP1 | +1 | After 48 hours of 50 and 100 µg / mL baicalin, the expression levels of Parp-1 and caspase 3 spiroosomal protein were significantly higher than those of the control group (all P values <0.01), while XIAP, NF-κB and Bcl-2. The level of protein expression was significantly reduced (all P values <0.05)                                                                                                                                                                                                 | Bai Huiru, Sa Yunli, Lu Shan, et al..Baicalin induces cell cycle arrest and apoptosis of human colon cancer in vitro and in vivo.Tumor.37,208-217(2017).                                                                               |
| 128 | HQin(Saikosaponin d combined with baicalin)            | PARP1 | -1 | Saikosaponin d combined with baicalin may inhibit the expression of PARP-1 in MCAO rats, reduce NAD <sup>+</sup> consumption, and achieve its neuroprotective effect on cerebral ischemia / reperfusion injury in rats                                                                                                                                                                                                                                                                                       | Dong Liping, Cui Yuhuan, Zhao Baomin, et al..Effect of saikosaponin d combined with baicalin on PARP-1 expression in rats with cerebral ischemia / reperfusion injury.Shanxi Journal of Traditional Chinese Medicine.37,929-931(2016). |
| 129 | HQin(Baicalin)                                         | CASP8 | +1 | Baicalin can obviously induce the apoptosis of tongue squamous cell carcinoma Tca8113, which may be                                                                                                                                                                                                                                                                                                                                                                                                          | Zhang Ying, Li Junmei, Qin Bowen, et al.The effects of scutellarin on apoptosis and the expression of caspase-8 in human tongue                                                                                                        |

|     |                                                                        |                      |    |                                                                                                                                                                                                                                                                                                                                                                                                                                                                                                                                                                                                                                                                                                                                                         |                                                                                                                                                                                                                                                                                                                                                                                                                                                                                                                            |
|-----|------------------------------------------------------------------------|----------------------|----|---------------------------------------------------------------------------------------------------------------------------------------------------------------------------------------------------------------------------------------------------------------------------------------------------------------------------------------------------------------------------------------------------------------------------------------------------------------------------------------------------------------------------------------------------------------------------------------------------------------------------------------------------------------------------------------------------------------------------------------------------------|----------------------------------------------------------------------------------------------------------------------------------------------------------------------------------------------------------------------------------------------------------------------------------------------------------------------------------------------------------------------------------------------------------------------------------------------------------------------------------------------------------------------------|
| 130 | HQin(Baicalin)                                                         | IFNG(IFN- $\gamma$ ) | -1 | <p>related to the up-regulation of caspase-8 protein expression.</p> <p>After baicalin intervention, the abortion rate and embryo absorption rate of group C were significantly lower than those of group B of RSA model (<math>P &lt; 0.01</math>), and the contents of INF-<math>\gamma</math> and IL-2 in uterine homogenate tissue were significantly reduced (<math>P &lt; 0.01</math>)</p> <p>The levels of IL-4, IL-10 and progesterone were significantly increased (<math>P &lt; 0.05</math>)</p> <p>There were increases (<math>P &lt; 0.05</math>) in the relative expression of ileal IFNG, TNFA, IL8, and IL1B at 3 DPI of layers in response to <i>S. pullorum</i> challenge</p>                                                          | <p>squamous carcinoma Tca8113 cells.Tianjin Medical Journal.43,237-240(2015).</p> <p>Ma Yannan, Yang Xiaoqi, Ma Xiaojun, et al. Effect of the Baicalin on recurrent spontaneous abortion mouse model of maternal fetal immune microenvironment. Journal of Changchun University of Chinese Medicine. 34, 627-630 (2018).</p>                                                                                                                                                                                               |
| 131 | HQin(Extracts From Flos Ionicerae in Combination With Baikal skullcap) | IFNG(IFN- $\gamma$ ) | -1 | <p>(Figure 1). However, they were all decreased (<math>P &lt; 0.05</math>) in layers of T group when compared with those in PC group. Furthermore, an up-regulation (<math>P &lt; 0.05</math>) in the relative expression of ileal IL10 at 3 DPI was observed in the birds from T group relative to PC group.</p> <p>After baicalin intervention, the abortion rate and embryo absorption rate of group C were significantly lower than those of group B of RSA model (<math>P &lt; 0.01</math>), and the contents of INF-<math>\gamma</math> and IL-2 in uterine homogenate tissue were significantly reduced (<math>P &lt; 0.01</math>)</p> <p>The levels of IL-4, IL-10 and progesterone were significantly increased (<math>P &lt; 0.05</math>)</p> | <p>Wang W, Jia H., Zhang H., et al. Supplemental Plant Extracts From Flos Ionicerae in Combination With Baikal skullcap Attenuate Intestinal Disruption and Modulate Gut Microbiota in Laying Hens Challenged by <i>Salmonella pullorum</i>. Frontiers in Microbiology. 10.</p> <p>Ma Yannan, Yang Xiaoqi, Ma Xiaojun, et al. Effect of the Baicalin on recurrent spontaneous abortion mouse model of maternal fetal immune microenvironment. Journal of Changchun University of Chinese Medicine. 34, 627-630 (2018).</p> |
| 132 | HQin(Baicalin)                                                         | IL2                  | -1 | <p>Compared with the H group, the uterine tissue damage of the H + Bai (baicalin) group was reduced, the level</p>                                                                                                                                                                                                                                                                                                                                                                                                                                                                                                                                                                                                                                      | <p>Gao Shansong, Wang Lei, Li Huatao, et al. Baicalin Regulates Heat Stress-induced Uterine Oxidative Damage in Mice (<i>Mus musculus</i>)</p>                                                                                                                                                                                                                                                                                                                                                                             |

of apoptosis was reduced, the content of malondialdehyde (MDA) was significantly reduced ( $P < 0.01$ ), and the total superoxide dismutase Enzyme (total superoxide dismutase, T-SOD) activity is significantly increased ( $P < 0.01$ ), glutathione peroxidase (glutathione peroxidase, GSH-Px) and catalase (catalase, CAT) Significantly increased ( $P < 0.05$ )

After baicalin intervention, the abortion rate and embryo absorption rate of group C were significantly lower than those of group B of RSA model ( $P < 0.01$ ), and the contents of INF- $\gamma$  and IL-2 in uterine homogenate tissue were significantly reduced ( $P < 0.01$ ) The levels of IL-4, IL-10 and progesterone were significantly increased ( $P < 0.05$ )

In the SAP + baicalein group, the levels of serum amylase, IL-6, TNF- $\alpha$ , MDA content in the lung tissue and apoptosis index decreased, SOD activity increased, Bax and p-p38MAPK in the lung tissue of the rats in the SAP and baicalein group Decreased protein expression, increased Bcl-2 protein expression ( $P < 0.05$ )

After 20, 40 and 80  $\mu\text{mol} / \text{L}$  baicalein treatment for 24 h, the expression of pro-apoptotic protein Bax in ovarian cancer HO-8910 cells was significantly

via Nrf2/Keap1 Signaling Pathway. *Journal of Agricultural Biotechnology*.27,2013-2022(2019).

Ma Yannan, Yang Xiaoqi, Ma Xiaojun, et al. Effect of the Baicalin on recurrent spontaneous abortion mouse model of maternal fetal immune microenvironment. *Journal of Changchun University of Chinese Medicine*.34,627-630(2018).

Zhu Xiaolin, Zhao Haiyan, Yang Jilin. Effects of baicalein on lung tissue injury in rats with severe acute pancreatitis[J/OL]. *Journal of Zhengzhou University(Medical Sciences)*.37-40(2020).

Huang Yan, Fu Jingli. Baicalein induces apoptosis in human ovarian cancer HO-8910 cells by activating Caspase and Bcl-2 family proteins. *Chinese Traditional and Herbal Drugs*.50,2620-2624(2019).

134 HQin(Baicalin) IL10 +1

135 HQin HMOX1 /

136 HQin(Baicalein) BAX -1

137 HQin(Baicalein) BAX +1

|     |                                                                        |           |    |                                                                                                                                                                                                                                                                                                                                                                                                                                                                                                                                                                                                   |                                                                                                                                                                                                                               |
|-----|------------------------------------------------------------------------|-----------|----|---------------------------------------------------------------------------------------------------------------------------------------------------------------------------------------------------------------------------------------------------------------------------------------------------------------------------------------------------------------------------------------------------------------------------------------------------------------------------------------------------------------------------------------------------------------------------------------------------|-------------------------------------------------------------------------------------------------------------------------------------------------------------------------------------------------------------------------------|
| 138 | JYH(Flos Lonicerae extracts)                                           | PTGS2     | -1 | <p>increased, while the expression of anti-apoptotic protein Bcl-2 was significantly reduced</p> <p>The suppression of transcription of IL-1<math>\beta</math>, IL-6, COX-2, and P-Selectin genes with Flos Lonicerae extracts was greater than that of CGA in PFOS-treated HUVECs, while the degree of suppression on PFOS-induced expression of NOS3 and ICAM-1 was greater for CGA.</p>                                                                                                                                                                                                        | Liao Y, Dong S, Kiyama R, et al. Flos lonicerae extracts and chlorogenic acid protect human umbilical vein endothelial cells from the toxic damage of perfluorooctane sulphonate. <i>Inflammation</i> . 36,767–779(2013).     |
| 139 | JYH(unfermented Flos Lonicera (UFL) and fermented Flos Lonicera (FFL)) | PTGS2     | -1 | <p>In cell-based studies, treatment with both unfermented Flos Lonicera (UFL) and fermented Flos Lonicera (FFL) formulations resulted in suppression of LPS-induced NO production and gene expression of vital proinflammatory cytokines (TNF-<math>\alpha</math>, COX-2, and IL-6) in RAW 264.7 cells</p> <p>Boiled LJ aqueous extracts directly inhibited both COX-1 and COX-2 activity, while non-boiled extracts stimulated COX-1. Boiled LJ extracts also inhibited expression of IL-1beta-induced COX-2 protein expression and suppressed its mRNA induction by IL-1beta in A549 cells.</p> | Wang JH, Bose S, Kim GC, et al. Flos Lonicera ameliorates obesity and associated endotoxemia in rats through modulation of gut permeability and intestinal microbiota. <i>PLoS One</i> . 9,e86117(2014).                      |
| 140 | JYH(extracts of Lonicera japonica)                                     | PTGS2     | -1 | <p>Boiled LJ aqueous extracts directly inhibited both COX-1 and COX-2 activity, while non-boiled extracts stimulated COX-1. Boiled LJ extracts also inhibited expression of IL-1beta-induced COX-2 protein expression and suppressed its mRNA induction by IL-1beta in A549 cells.</p>                                                                                                                                                                                                                                                                                                            | Xu Y, Oliverson BG, Simmons DL. Trifunctional inhibition of COX-2 by extracts of Lonicera japonica: direct inhibition, transcriptional and post-transcriptional down regulation. <i>J Ethnopharmacol</i> . 111,667–670(2007). |
| 141 | JYH                                                                    | iNOS      | /  |                                                                                                                                                                                                                                                                                                                                                                                                                                                                                                                                                                                                   |                                                                                                                                                                                                                               |
| 142 | JYH(Lonicera japonica aqueous extract )                                | RELA(P65) | -1 | <p>Observation of the improvement effect and mechanism of the Lonicera japonica aqueous extract on diabetic retinopathy. Western blot results showed that FL can inhibit the nuclear factor-<math>\kappa</math>B (NF-<math>\kappa</math>B, NF-<math>\kappa</math>B in streptozotocin (STZ) -induced diabetic mouse</p>                                                                                                                                                                                                                                                                            | Zhou Lingyu, Yu Zengyang, Palida Abuliz, et al. Improvement of Lonicera japonica aqueous extract on diabetic retinopathy. <i>Chinese Pharmacological Bulletin</i> . 31,1710-1714(2015).                                       |

|     |                                                                        |                        |    |                                                                                                                                                                                                                                                                                                                                                                                                                                                                            |                                                                                                                                                                                                                                                                                                            |
|-----|------------------------------------------------------------------------|------------------------|----|----------------------------------------------------------------------------------------------------------------------------------------------------------------------------------------------------------------------------------------------------------------------------------------------------------------------------------------------------------------------------------------------------------------------------------------------------------------------------|------------------------------------------------------------------------------------------------------------------------------------------------------------------------------------------------------------------------------------------------------------------------------------------------------------|
| 143 | JYH(Honeysuckle)                                                       | TNF                    | -1 | retina) ) Transnuclear activation of the p65 subunit. Honeysuckle can inhibit the overexpression of IL-1 $\beta$ , PGE2, and TNF- $\alpha$ , reduce cervical mucosal necrosis, and has a certain effect on rat cervicitis.                                                                                                                                                                                                                                                 | Wang Ping, Zhang Xiaoling. Therapeutic effect of honeysuckle on cervicitis in rats. Chinese Journal of Gerontology.032,1441-1443(2012).                                                                                                                                                                    |
| 144 | JYH(Lonicera japonica Thunb extract)                                   | IL6                    | -1 | Lonicera japonica Thunb extract has an immunosuppressive effect, inhibiting or reducing inflammation by inhibiting pro-inflammatory cytokines such as TNF- $\alpha$ , IL-1 $\beta$ , and IL-6<br>The suppression of transcription of IL-1 $\beta$ , IL-6, COX-2, and P-Selectin genes with Flos Lonicerae extracts was greater than that of CGA in PFOS-treated HUVECs, while the degree of suppression on PFOS-induced expression of NOS3 and ICAM-1 was greater for CGA. | Yan Xuelong, Meng Aiping, Pu sheban. Research Progress on Activities of Anti-inflammation and Immunity from the flower of Lonicera japonica Thunb.. Chinese Wild Plant Resources.35,41-44(2016).                                                                                                           |
| 145 | JYH(Flos Lonicerae extracts)                                           | IL6                    | -1 | In cell-based studies, treatment with both unfermented Flos Lonicera (UFL) and fermented Flos Lonicera (FFL) formulations resulted in suppression of LPS-induced NO production and gene expression of vital proinflammatory cytokines (TNF- $\alpha$ , COX-2, and IL-6) in RAW 264.7 cells                                                                                                                                                                                 | Liao Y, Dong S, Kiyama R, et al. Flos lonicerae extracts and chlorogenic acid protect human umbilical vein endothelial cells from the toxic damage of perfluorooctane sulphonate. Inflammation. 36,767-779(2013).                                                                                          |
| 146 | JYH(unfermented Flos Lonicera (UFL) and fermented Flos Lonicera (FFL)) | IL6                    | -1 | polyphenol components isolated from Korea L. japonica T. should have anti-inflammatory effect on LPS-stimulated RAW 264.7 cells through the decrease of proinflammatory mediators expression by suppressing NF- $\kappa$ B and p38 MAPK activity.                                                                                                                                                                                                                          | Wang JH, Bose S, Kim GC, et al. Flos Lonicera ameliorates obesity and associated endotoxemia in rats through modulation of gut permeability and intestinal microbiota. PLoS One.9, e86117(2014).                                                                                                           |
| 147 | JYH(Polyphenol Components Isolated from Korea Lonicera japonica)       | MAPK14 (P38 $\alpha$ ) | -1 |                                                                                                                                                                                                                                                                                                                                                                                                                                                                            | Park Kwang-Il, Kang Sang-Rim, Park Hyeon-Soo, et al. Regulation of Proinflammatory Mediators via NF- $\kappa$ B and p38 MAPK-Dependent Mechanisms in RAW 264.7 Macrophages by Polyphenol Components Isolated from Korea Lonicera japonica THUNB. . Evid Based Complement Alternat Med. 2012, 828521(2012). |

|     |                                                                  |                    |    |                                                                                                                                                                                                                                                                                           |                                                                                                                                                                                                                                                                                                           |
|-----|------------------------------------------------------------------|--------------------|----|-------------------------------------------------------------------------------------------------------------------------------------------------------------------------------------------------------------------------------------------------------------------------------------------|-----------------------------------------------------------------------------------------------------------------------------------------------------------------------------------------------------------------------------------------------------------------------------------------------------------|
| 148 | JYH(Honeysuckle)                                                 | CASP3              | -1 | Honeysuckle can significantly inhibit the expression of Caspase-3 and NF- $\kappa$ B in mice with viral myocarditis, providing an experimental basis for the clinical application of honeysuckle in the treatment of viral myocarditis                                                    | Lou Xusheng, Hu Jinghong, Wang Fen, et al. Effect of honeysuckle on expression of Caspase-3 and NF- $\kappa$ B in mice with viral myocarditis. <i>Shanghai Journal of Traditional Chinese Medicine</i> . 53,71-74(2019).                                                                                  |
| 149 | JYH(extracts of Lonicera japonica)                               | PTGS1(COX1)        | -1 | Boiled LJ aqueous extracts directly inhibited both COX-1 and COX-2 activity, while non-boiled extracts stimulated COX-1. Boiled LJ extracts also inhibited expression of IL-1 $\beta$ -induced COX-2 protein expression and suppressed its mRNA induction by IL-1 $\beta$ in A549 cells.  | Xu Y, Oliverson BG, Simmons DL. Trifunctional inhibition of COX-2 by extracts of <i>Lonicera japonica</i> : direct inhibition, transcriptional and post-transcriptional down regulation. <i>J Ethnopharmacol</i> . 111,667–670(2007).                                                                     |
| 150 | JYH(Honeysuckle)                                                 | ICAM1              | -1 | Compared with normal saline group, serum IFN- $\gamma$ level and ICAM-I and IL-12 expression in skin lesions of dexamethasone group, Cortex Dictamni group, honeysuckle group and radix angelicae sinensis group were significantly lower than that of normal saline group (P <0.01-0.05) | Huang Peng. Study on the mechanism of the effects of Cortex Dictamni, rehmannia glutinosa, catmint, angelica, honeysuckle and radix angelicae sinensis on allergic contact dermatitis[D]. Guangdong: Guangdong Medical University.(2007).                                                                 |
| 151 | JYH(Lonicera japonica Thunb extract)                             | IL1B(IL1 $\beta$ ) | -1 | <i>Lonicera japonica</i> Thunb extract has an immunosuppressive effect, inhibiting or reducing inflammation by inhibiting pro-inflammatory cytokines such as TNF- $\alpha$ , IL-1 $\beta$ , and IL-6                                                                                      | Yan Xuelong, Meng Aiping, Pu sheban. Research Progress on Activities of Anti-inflammation and Immunity from the flower of <i>Lonicera japonica</i> Thunb.. <i>Chinese Wild Plant Resources</i> . 35,41-44(2016).                                                                                          |
| 152 | JYH(Flavonoids Isolated from Flowers of Lonicera japonica Thunb) | IL1B(IL1 $\beta$ ) | -1 | PELJ significantly inhibited LPS-induced interleukin-1 $\beta$ and tumor necrosis factor- $\alpha$ expressions and LPS-induced nitric oxide (NO) and prostaglandin E2 expressions by down-regulating inducible enzyme NO synthase and cyclooxygenase-2 at the protein and                 | Han MH, Lee WS, Nagappan A, et al. Flavonoids Isolated from Flowers of <i>Lonicera japonica</i> Thunb. Inhibit Inflammatory Responses in BV2 Microglial Cells by Suppressing TNF- $\alpha$ and IL- $\beta$ Through PI3K/Akt/NF- $\kappa$ B Signaling Pathways. <i>Phytother Res</i> . 30,1824–1832(2016). |



|     |                                    |                    |    |                                                                                                                                                                                                                                                                                                                                                                                                                                                                                                                                                                                                                                                                                     |                                                                                                                                                                                                                                               |
|-----|------------------------------------|--------------------|----|-------------------------------------------------------------------------------------------------------------------------------------------------------------------------------------------------------------------------------------------------------------------------------------------------------------------------------------------------------------------------------------------------------------------------------------------------------------------------------------------------------------------------------------------------------------------------------------------------------------------------------------------------------------------------------------|-----------------------------------------------------------------------------------------------------------------------------------------------------------------------------------------------------------------------------------------------|
| 153 | JYH(Flos Lonicerae extracts)       | IL1B(IL1 $\beta$ ) | -1 | <p>mRNA levels.</p> <p>The suppression of transcription of IL-1<math>\beta</math>, IL-6, COX-2, and P-Selectin genes with Flos Lonicerae extracts was greater than that of CGA in PFOS-treated HUVECs, while the degree of suppression on PFOS-induced expression of NOS3 and ICAM-1 was greater for CGA.</p> <p>Boiled LJ aqueous extracts directly inhibited both COX-1 and COX-2 activity, while non-boiled extracts stimulated COX-1. Boiled LJ extracts also inhibited expression of IL-1beta-induced COX-2 protein expression and suppressed its mRNA induction by IL-1beta in A549 cells.</p>                                                                                | <p>Liao Y, Dong S, Kiyama R, et al. Flos lonicerae extracts and chlorogenic acid protect human umbilical vein endothelial cells from the toxic damage of perfluorooctane sulphonate. <i>Inflammation</i>.36,767–779( 2013).</p>               |
| 154 | JYH(extracts of Lonicera japonica) | IL1B(IL1 $\beta$ ) | -1 | <p>Honeysuckle mainly increases the effect on Mdm2 protein in the P53 pathway. P53 can initiate apoptosis, and Mdm2 can feedback inhibit P53 expression.</p> <p>Pharmacological effects</p> <p>Protein Pathway Array technology was used to analyze the effect of SBX on H1975 protein expression. A total of 166 phosphorylated and non-phosphorylated proteins were detected, 53 of which were expressed, and 15 differentially expressed proteins. Among them, Cdk6, EGFR, Survivin and mTor protein expression levels were up-regulated, while p27, p-RB, Cyclin D1, Cyclin E, XIAP, p53, p-p53, p-AKT, Akt, Notch4 and Cdk4 protein expression levels were down regulated.</p> | <p>Xu Y, Oliverson BG, Simmons DL. Trifunctional inhibition of COX-2 by extracts of Lonicera japonica: direct inhibition, transcriptional and post-transcriptional down regulation. <i>J Ethnopharmacol</i>. 111,667–670(2007).</p>           |
| 155 | JYH(Honeysuckle)                   | TP53 (P53)         | -1 | <p>Pharmacological effects</p> <p>Protein Pathway Array technology was used to analyze the effect of SBX on H1975 protein expression. A total of 166 phosphorylated and non-phosphorylated proteins were detected, 53 of which were expressed, and 15 differentially expressed proteins. Among them, Cdk6, EGFR, Survivin and mTor protein expression levels were up-regulated, while p27, p-RB, Cyclin D1, Cyclin E, XIAP, p53, p-p53, p-AKT, Akt, Notch4 and Cdk4 protein expression levels were down regulated.</p>                                                                                                                                                              | <p>Ouyang Yulin. Study on literature research of Traditional Chinese Medicine in Intervening Cardiomyocyte apoptosis and the study on pharmacological mechanism of Yixin Jiedu Formula [D].Beijing University of Chinese Medicine.(2013).</p> |
| 156 | JYH(Skutellaria extract SBX)       | TP53 (P53)         | -1 | <p>Protein Pathway Array technology was used to analyze the effect of SBX on H1975 protein expression. A total of 166 phosphorylated and non-phosphorylated proteins were detected, 53 of which were expressed, and 15 differentially expressed proteins. Among them, Cdk6, EGFR, Survivin and mTor protein expression levels were up-regulated, while p27, p-RB, Cyclin D1, Cyclin E, XIAP, p53, p-p53, p-AKT, Akt, Notch4 and Cdk4 protein expression levels were down regulated.</p>                                                                                                                                                                                             | <p>Liu Xiaoliang, Zhao Xin, Han Wei,et al.Influence of Skutellaria extract SBX on NSCLC cell proliferation and signaling networks.Chinese Journal of Cancer Prevention and Treatment.21,25-28(2014).</p>                                      |

|     |                                                                       |              |    |                                                                                                                                                                                                                                                                                                                                                                                                                                                                                                                                                                                    |                                                                                                                                                                                                                                                                                            |
|-----|-----------------------------------------------------------------------|--------------|----|------------------------------------------------------------------------------------------------------------------------------------------------------------------------------------------------------------------------------------------------------------------------------------------------------------------------------------------------------------------------------------------------------------------------------------------------------------------------------------------------------------------------------------------------------------------------------------|--------------------------------------------------------------------------------------------------------------------------------------------------------------------------------------------------------------------------------------------------------------------------------------------|
| 157 | JYH(Polysaccharide from Lonicera japonica)                            | BCL2         | -1 | The experimental results show that the Polysaccharide from Lonicera japonica in the 30 mg / (kg · d) and 90 mg / (kg · d) dose groups can up-regulate the expression level of Bax protein in mice S180 sarcoma and down-regulate the expression level of Bcl-2 protein, Bax / Bcl-2 Ratio increase<br>To explore the molecular mechanism of the anti-oxidation of honeysuckle. The apoptosis rate of the Jb group was significantly lower than that of the H2 and Ja groups, the expression of Bcl-2 increased, and the expressions of HSP-70, NF-kB, Bax and Caspase-3 decreased. | Liu Yuguo, Liu Yuhong, Jiang Haiqiang. Inhibitory Effect and Mechanism of Polysaccharide from Lonicera japonica on Mice Bearing S180 Sarcoma. Journal of Oncology. 18, 584-587 (2012).                                                                                                     |
| 158 | JYH(Honeysuckle)                                                      | BCL2         | +1 |                                                                                                                                                                                                                                                                                                                                                                                                                                                                                                                                                                                    | Meng Mingli, Gong Cuicui, Zheng Yuxia, et al. The molecular mechanism of anti-oxidative effects of honeysuckle: An experimental study. Practical Journal of Medicine & Pharmacy. 1104-1106 (2008).                                                                                         |
| 159 | JYH                                                                   | TGFB1(TGFβ1) | /  |                                                                                                                                                                                                                                                                                                                                                                                                                                                                                                                                                                                    |                                                                                                                                                                                                                                                                                            |
| 160 | JYH                                                                   | MAPK1        | /  |                                                                                                                                                                                                                                                                                                                                                                                                                                                                                                                                                                                    |                                                                                                                                                                                                                                                                                            |
| 161 | JYH(Extracts From Flos lonicerae in Combination With Baikal skullcap) | CXCL8 (IL8)  | -1 | pullorum challenge impaired ( P < 0.05) the production performance (egg production, feed intake, and feed efficiency) of laying hens, increased ( P < 0.05) serum endotoxin content and frequency of Salmonella -positive organs, as well as up-regulated ( P < 0.05) ileal expression of pro-inflammatory cytokines including IFNG , TNFA , IL8 , and IL1B , whereas PE addition reversed ( P < 0.05) these changes and increased ( P < 0.05) ileal IL10 expression.                                                                                                              | Wang Wei-Wei, Jia Hong-Jie, Zhang Hai-Jun, et al. Supplemental Plant Extracts From Flos lonicerae in Combination With Baikal skullcap Attenuate Intestinal Disruption and Modulate Gut Microbiota in Laying Hens Challenged by Salmonella pullorum .. Frontiers in microbiology. 10, 2019. |
| 162 | JYH(Honeysuckle decoction)                                            | CRP          | -1 | Honeysuckle decoction can effectively reduce the levels of inflammatory factors and CPR in patients, and                                                                                                                                                                                                                                                                                                                                                                                                                                                                           | Song Changliang, Du Xuefei, Yang Qiong, et al. Immunomodulatory effect of honeysuckle decoction on patients with radiation                                                                                                                                                                 |

|     |                                    |            |    |                                                                                                                                                                                                                                                                                                                                                                                                                                                                                                                                                                                                                                                                                                                                                             |                                                                                                                                                                                                                                                                                                                                                                |
|-----|------------------------------------|------------|----|-------------------------------------------------------------------------------------------------------------------------------------------------------------------------------------------------------------------------------------------------------------------------------------------------------------------------------------------------------------------------------------------------------------------------------------------------------------------------------------------------------------------------------------------------------------------------------------------------------------------------------------------------------------------------------------------------------------------------------------------------------------|----------------------------------------------------------------------------------------------------------------------------------------------------------------------------------------------------------------------------------------------------------------------------------------------------------------------------------------------------------------|
|     |                                    |            |    | stabilize the proportion of lymphocyte subgroup structure                                                                                                                                                                                                                                                                                                                                                                                                                                                                                                                                                                                                                                                                                                   | esophagitis. <i>Journal of Modern Oncology</i> .27,580-583(2019).                                                                                                                                                                                                                                                                                              |
| 163 | JYH                                | CCL2       | /  |                                                                                                                                                                                                                                                                                                                                                                                                                                                                                                                                                                                                                                                                                                                                                             |                                                                                                                                                                                                                                                                                                                                                                |
| 164 | JYH((Honeysuckle) Caffeic acid CA) | MAPK8      | -1 | (Honeysuckle) Caffeic acid CA can inhibit APAP-induced phosphorylation activation of ERK1 / 2 and JNK. After applying inhibitors, we found that ERK1 / 2 inhibitors can inhibit APAP-induced Egr1 nuclear translocation<br>Mechanistically, ChondroT and its constituent herbs downregulated the expressional levels of osteoclast-specific proteins such as NFATc1, c-Fos, Cathepsin K, and matrix metalloproteinase 9 (MMP9) by suppressing NF-κB translocation to nucleus and MAPKs phosphorylation at different levels.<br>WIN-34B increased the OPG/RANKL ratio and the expression of RUNX2, and suppressed the expression of IL-17, c-Fos, and TNF-α. It also suppressed the activation of NF-κB, IκBα, p38 MAPK, and JNK in a dose-dependent manner. | Pang Chun. Caffeic acid antagonizes acetaminophen hepatotoxicity and its mechanism[D].Shanghai:Shanghai University of Traditional Chinese Medicine.(2015).<br>Guo RH, Kim SJ, Choi CH, Na CS, Kang BY, Kim YR. Inhibitory effects of ChondroT and its constituent herbs on RANKL-induced osteoclastogenesis. <i>BMC Complement Altern Med</i> . 20,319(2019) . |
| 165 | JYH                                | FOS(C-FOS) | -1 | WIN-34B increased the OPG/RANKL ratio and the expression of RUNX2, and suppressed the expression of IL-17, c-Fos, and TNF-α. It also suppressed the activation of NF-κB, IκBα, p38 MAPK, and JNK in a dose-dependent manner.                                                                                                                                                                                                                                                                                                                                                                                                                                                                                                                                | Seo BK, Ryu HK, Park YC, Huh JE, Baek YH. Dual effect of WIN-34B on osteogenesis and osteoclastogenesis in cytokine-induced mesenchymal stem cells and bone marrow cells. <i>J Ethnopharmacol</i> . 193,227-236(2016).                                                                                                                                         |
| 166 | JYH(WIN-34B)                       | FOS(C-FOS) | -1 | The eosinophil count, serum IL-4, IL-17, sIgE levels, tissue IL-17 mRNA expression, IL-17 protein expression level in the nasal mucosa pathological section of the honeysuckle treatment group and the positive control group were all compared with the model The control group decreased (all P <0.01), while the serum levels of IL-2 and IFN-γ increased (all                                                                                                                                                                                                                                                                                                                                                                                           | Jian Lei, Xiao caiwen, he Qingwen, et al.Effect of Honeysuckle Extract on Expression of Cytokines in Mice with Allergic Rhinitis. <i>Acta Medicinae Universitatis Scientiae et Technologiae Huazhong</i> .46,285-290(2017).                                                                                                                                    |
| 167 | JYH(Honeysuckle Extract)           | IL4        | -1 |                                                                                                                                                                                                                                                                                                                                                                                                                                                                                                                                                                                                                                                                                                                                                             |                                                                                                                                                                                                                                                                                                                                                                |

P <0.01).

|     |                                  |                 |    |                                                                                                                                                                                                                                                                                                |                                                                                                                                                                                                                                                                                |
|-----|----------------------------------|-----------------|----|------------------------------------------------------------------------------------------------------------------------------------------------------------------------------------------------------------------------------------------------------------------------------------------------|--------------------------------------------------------------------------------------------------------------------------------------------------------------------------------------------------------------------------------------------------------------------------------|
| 168 | JYH                              | IL1AAIL-1<br>α) | /  |                                                                                                                                                                                                                                                                                                |                                                                                                                                                                                                                                                                                |
| 169 | JYH(Honeysuckle alcohol extract) | STAT1           | -1 | Honeysuckle alcohol extract can significantly inhibit the lipopolysaccharide-induced JNK, ERK 1/2, p38 MAPKs, PI3K / Akt and JAK1 pathway signaling and STAT1 / 3 transcriptional activation, thereby inhibiting the activation of NF-κB                                                       | Li Yongwei, Wang Zhisheng, Liu Xinwei. Advances in anti-infective effects of honeysuckle. China Modern Doctor. 57, 165-168 (2019).                                                                                                                                             |
| 170 | JYH                              | EGFR            | /  |                                                                                                                                                                                                                                                                                                |                                                                                                                                                                                                                                                                                |
| 171 | JYH                              | CXCL10          | /  |                                                                                                                                                                                                                                                                                                |                                                                                                                                                                                                                                                                                |
| 172 | JYH(Honeysuckle)                 | SOD1            | +1 | After intragastric administration of honeysuckle for 1 to 2 hours, the plasma levels of T-AOC, GSH-Px, GSH, and SOD in rats were significantly higher than before gavage (P <0.05), while the MDA content was significantly reduced (P <0.05)                                                  | Gong Cuicui, Zheng Naigang, Wu Jinglan, et al. Antioxidant effect of honeysuckle on hepatic RBL cells of rats in vivo and in vitro and mechanism. Journal of Jilin University (Medicine Edition). 35, 1074-1078 (2009).                                                        |
| 173 | JYH                              | PARP1           | /  |                                                                                                                                                                                                                                                                                                |                                                                                                                                                                                                                                                                                |
| 174 | JYH                              | CASP8           | /  |                                                                                                                                                                                                                                                                                                |                                                                                                                                                                                                                                                                                |
| 175 | JYH(Flos Lonicerae Japonicas)    | IFNG(IFN-γ)     | -1 | Compared with normal saline group, serum IFN-γ level and ICAM-I and IL-12 expression in skin lesions of dexamethasone group, Cortex Dictamni group, Flos Lonicerae Japonicas group and Radix Angelicae Sinensis group were significantly lower than that of normal saline group (P <0.01-0.05) | Huang Peng. Study on the mechanism of allergic contact dermatitis in mice with Cortex Dictamni, adhesive rehmannia, Herba Schizonepetae, Radix Angelicae Sinensis, Flos Lonicerae Japonicas and Radix Angelicae Dahuricae[D]. Guangdong: Guangdong Medical University. (2007). |
| 176 | JYH(Honeysuckle Extract)         | IFNG(IFN-γ)     | +1 | The eosinophil count, serum IL-4, IL-17, sIgE levels, tissue IL-17mRNA expression, IL-17 protein expression level in the nasal mucosa pathological                                                                                                                                             | Jian Lei, Xiao caiwen, he Qingwen, et al. Effect of Honeysuckle Extract on Expression of Cytokines in Mice with Allergic Rhinitis. Acta Medicinæ Universitatis Scientiæ et Technologiæ                                                                                         |

|     |                                              |       |    |                                                                                                                                                                                                                                                                                                                                                                                                                                                                                                                                                                                            |                                                                                                                                                                                                                                                 |
|-----|----------------------------------------------|-------|----|--------------------------------------------------------------------------------------------------------------------------------------------------------------------------------------------------------------------------------------------------------------------------------------------------------------------------------------------------------------------------------------------------------------------------------------------------------------------------------------------------------------------------------------------------------------------------------------------|-------------------------------------------------------------------------------------------------------------------------------------------------------------------------------------------------------------------------------------------------|
| 177 | JYH(Honeysuckle Extract)                     | IL2   | +1 | section of the honeysuckle treatment group and the positive control group were all compared with the model control Group decreased (all P <0.01), while serum IL-2 and IFN- $\gamma$ levels increased (all P <0.01) The eosinophil count, serum IL-4, IL-17, sIgE levels, tissue IL-17mRNA expression, IL-17 protein expression level in the nasal mucosa pathological section of the honeysuckle treatment group and the positive control group were all compared with the model control Group decreased (all P <0.01), while serum IL-2 and IFN- $\gamma$ levels increased (all P <0.01) | Huazhong.46,285-290(2017).                                                                                                                                                                                                                      |
| 178 | JYH(Flavonoids from Lonicera japonica Thunb) | CAT   | +1 | Flavonoids from Lonicera japonica Thunb in each dose group significantly increased the total antioxidant capacity of cells and cell culture fluids (P <0.05), and significantly increased SOD, GSH-Px, CAT activity and GSH content (P <0.05)                                                                                                                                                                                                                                                                                                                                              | Jian Lei, Xiao caiwen, he Qingwen,et al.Effect of Honeysuckle Extract on Expression of Cytokines in Mice with Allergic Rhinitis.Acta Medicinae Universitatis Scientiae et Technologiae Huazhong.46,285-290(2017).                               |
| 179 | JYH                                          | IL10  | /  |                                                                                                                                                                                                                                                                                                                                                                                                                                                                                                                                                                                            | Luo Lei, Zhang Bingjie, Wei Qianqian, et AL.Protective Effects of Flavonoids from Lonicera japonica Thunb. on Hydrogen Peroxide Induced Toxicity in RAW 264.7 Cells.Journal of Chinese Institute of Food Science and Technology.19,18-25(2019). |
| 180 | JYH                                          | HMOX1 | /  |                                                                                                                                                                                                                                                                                                                                                                                                                                                                                                                                                                                            |                                                                                                                                                                                                                                                 |
| 181 | JYH(Polysaccharide from Lonicera japonica)   | BAX   | +1 | The experimental results show that the Polysaccharide from Lonicera japonica in the 30 mg / (kg · d) and 90 mg / (kg · d) dose groups can up-regulate the expression level of Bax protein in mice S180 sarcoma and down-regulate the expression level of Bcl-2 protein, Bax / Bcl-2 Ratio increase                                                                                                                                                                                                                                                                                         | Liu Yuguo, Liu Yuhong, Jiang Haiqiang.Inhibitory Effect and Mechanism of Polysaccharide from Lonicera japonica on Mice Bearing S180 Sarcoma.Journal of Chinese Oncology.18,584-587(2012).                                                       |
| 182 | JYH(Honeysuckle)                             | BAX   | -1 | To explore the molecular mechanism of the anti-oxidation of honeysuckle. The apoptosis rate of                                                                                                                                                                                                                                                                                                                                                                                                                                                                                             | Meng Mingli, Gong Cuicui, Zheng Yuxia,et al.The molecular mechanism of anti-oxidative effects of honeysuckle: An experimental                                                                                                                   |

|     |                                                               |       |    |                                                                                                                                                                                                                                                                                                                                                                                                                                                                                                                                                                                                                                                                         |                                                                                                                                                                                                                              |
|-----|---------------------------------------------------------------|-------|----|-------------------------------------------------------------------------------------------------------------------------------------------------------------------------------------------------------------------------------------------------------------------------------------------------------------------------------------------------------------------------------------------------------------------------------------------------------------------------------------------------------------------------------------------------------------------------------------------------------------------------------------------------------------------------|------------------------------------------------------------------------------------------------------------------------------------------------------------------------------------------------------------------------------|
| 183 | JYH(Lonicera japonica solution)                               | BAX   | -1 | <p>the Jb group was significantly lower than that of the H2 and Ja groups, the expression of Bcl-2 increased, and the expressions of HSP-70, NF-κB, Bax and Caspase-3 decreased.</p> <p>Lonicera japonica solution affects the expression of Bax protein, Caspase-3 protein and NF-κB protein in the myocardial tissue of mice with heart injury induced by ephedrine. Lonicera japonica solution has a strong antioxidant effect, which can reduce the production of oxidation products, increase the activity of antioxidant enzymes, reduce the expression of apoptosis proteins caused by ephedrine, reduce the damage of cardiomyocytes, and protect the heart</p> | <p>study.Practical Journal of Medicine &amp; Pharmacy.1104-1106(2008).</p> <p>Liu Tingting. Effect of Lonicera japonica solution on the damage of mice heart induced by ephedrine[D].Northwest Normal University.(2016).</p> |
| 184 | GC(Gl radix and glycyrrhizin (GL), the main part of Gl radix) | PTGS2 | -1 | <p>The present study was performed to clarify the effects of Gl radix and glycyrrhizin (GL), the main part of Gl radix, on estradiol (E2)-related endometrial carcinogenesis. Both Gl radix and GL exerted a significant decrease in the COX-2, IL-1α and TNF-α mRNA expressions.</p>                                                                                                                                                                                                                                                                                                                                                                                   | <p>Niwa K, Lian Z, Onogi K, et al. Preventive effects of glycyrrhizin on estrogen-related endometrial carcinogenesis in mice. <i>Oncol Rep.</i> 17,617–622(2007).</p>                                                        |
| 185 | GC(Glycyrrhizin)                                              | PTGS2 | -1 | <p>The results showed that glycyrrhizin significantly suppressed LPS-induced TNF-α, IL-1β, NO, and PGE2 production. Also, LPS-induced iNOS and COX-2 expression were attenuated by glycyrrhizin.</p>                                                                                                                                                                                                                                                                                                                                                                                                                                                                    | <p>Wang XR, Hao HG, Chu L. Glycyrrhizin inhibits LPS-induced inflammatory mediator production in endometrial epithelial cells. <i>Microb Pathog.</i> 109,110–113(2017).</p>                                                  |
| 186 | GC(Licorice ethanol extract)                                  | PTGS2 | +1 | <p>The transcriptional level of Kitl was not significantly different between the groups, whereas mRNA levels of Cyp11a1 and Ptgs2 were significantly up-regulated in</p>                                                                                                                                                                                                                                                                                                                                                                                                                                                                                                | <p>Yang H, Kim HJ, Pyun BJ, et al. Licorice ethanol extract improves symptoms of polycytic ovary syndrome in Letrozole-induced female rats. <i>Integr Med Res.</i> 7,264–270(2018).</p>                                      |

the GRR treatment group as compared with the PCOS group

18β glycyrrhetic acid, isoliquiritigenin, and ursolic acid inhibited the gene expressions of ICAM-1, TNF-α, COX-2, and iNOS, partly through inhibiting NF-κB expression and attenuating NF-κB nuclear translocation.

Jun-Xian Zhou, Michael Wink. Evidence for Anti-Inflammatory Activity of Isoliquiritigenin, 18β Glycyrrhetic Acid, Ursolic Acid, and the Traditional Chinese Medicine Plants *Glycyrrhiza glabra* and *Eriobotrya japonica*, at the Molecular Level. *Medicines*.6,(2019).

DSS markedly induced COX-2 expression in colon tissue versus control group, but increased COX-2 expression was significantly reduced by GR administration

Jeon YD, Bang KS, Shin MK, et al. Regulatory effects of glycyrrhizae radix extract on DSS-induced ulcerative colitis. *BMC Complement Altern Med*. 16,459(2016).

The results showed that glycyrrhizin significantly suppressed LPS-induced TNF-α, IL-1β, NO, and PGE2 production. Also, LPS-induced iNOS and COX-2 expression were attenuated by glycyrrhizin.

Wang XR, Hao HG, Chu L. Glycyrrhizin inhibits LPS-induced inflammatory mediator production in endometrial epithelial cells. *Microb Pathog*. 109,110–113(2017).

Total flavonoid from *Glycyrrhizae Radix et Rhizoma* (TFRG) and isoliquiritigenin (ISL) dose-dependently inhibited the expression of arginase 1 (Arg-1) at the gene and protein levels, and increased the heme oxygenase 1 (HO-1) Gene expression, while increasing the protein expression of inducible nitric oxide synthase (iNOS), increasing the expression of microRNA-155 and one of its target genes, SHIP1, and reducing signal transduction and transcriptional activation factors 3 and 6 (STAT3 / 6 ) Protein

Wang Yuanyuan, Tan Xi, Yang Xiaolu, et al. Total flavonoid from *Glycyrrhizae Radix et Rhizoma* and its ingredient isoliquiritigenin regulation M2 phenotype polarization of macrophages. *China Journal of Chinese Materia Medica*.40,4475-4481(2015).

|     |                                                                                                  |             |    |
|-----|--------------------------------------------------------------------------------------------------|-------------|----|
| 187 | GC(18β glycyrrhetic acid, isoliquiritigenin, and ursolic acid)                                   | PTGS2       | -1 |
| 188 | GC( <i>Glycyrrhiza</i> radix extract)                                                            | PTGS2       | -1 |
| 189 | GC( <i>Glycyrrhiza</i> radix)                                                                    | iNOS(NO S2) | -1 |
| 190 | GC(Total flavonoid from <i>Glycyrrhizae Radix et Rhizoma</i> (TFRG) and isoliquiritigenin (ISL)) | iNOS(NO S2) | +1 |

|     |                                 |           |    |                                                                                                                                                                                                                                                                                                                                                                                                                                                                                                                     |                                                                                                                                                                                                                            |
|-----|---------------------------------|-----------|----|---------------------------------------------------------------------------------------------------------------------------------------------------------------------------------------------------------------------------------------------------------------------------------------------------------------------------------------------------------------------------------------------------------------------------------------------------------------------------------------------------------------------|----------------------------------------------------------------------------------------------------------------------------------------------------------------------------------------------------------------------------|
| 191 | GC(Glycyrrhetic acid)           | RELA(P65) | -1 | <p>phosphorylation level</p> <p>The cells in the experimental group were treated with 100 <math>\mu\text{mol}\cdot\text{L}^{-1}</math> glycyrrhetic acid, the control group was treated with 10 <math>\mu\text{g}\cdot\text{L}^{-1}</math> doxorubicin (DOX), and the cells in the blank group were treated with the same amount of normal saline. As a result, after intervention for 48 h, the p65 protein was relatively The expression levels were <math>1.06 \pm 0.21, 0.63 \pm 0.15, 0.66 \pm 0.24</math></p> | Ding Peijian, Wang Jingjing, Zhao Jin, et al. Effect of glycyrrhetic acid on proliferation of gastric cancer cell line SGC7901 and its mechanism. The Chinese Journal of Clinical Pharmacology. 35, 1902-1904+1908 (2019). |
| 192 | GC(Glycyrrhizin)                | TNF       | -1 | <p>After treatment, the TNF-<math>\alpha</math>, IL-6 and PASI scores of the study group were lower than those of the control group, the difference was statistically significant (<math>P &lt; 0.05</math>);</p> <p>Glycyrrhetic acid can reduce airway inflammation and improve asthma symptoms by reducing inflammatory cells (lymphocytes and eosinophils) and down-regulating the levels of cytokines IgE, IL-4 and TNF-<math>\alpha</math>.</p>                                                               | Lin Junjie. Effect of Acitretin Capsule Combined With Compound Glycyrrhizin on Psoriasis Effect and Inflammation. China Health Standard Management. 11, 81-83 (2020).                                                      |
| 193 | GC(Glycyrrhetic acid)           | TNF       | -1 | <p>Glycyrrhetic acid can reduce airway inflammation and improve asthma symptoms by reducing inflammatory cells (lymphocytes and eosinophils) and down-regulating the levels of cytokines IgE, IL-4 and TNF-<math>\alpha</math>.</p>                                                                                                                                                                                                                                                                                 | Chen Wei, Ma Lei, Yang Lishan. Effects of glycyrrhetic acid on IgE, IL-4 and TNF- $\alpha$ in bronchial asthma rats. Pharmacology and Clinics of Chinese Materia Medica. 031, 52-55 (2015).                                |
| 194 | GC(Glycyrrhizae radix extract)  | IL6       | -1 | <p>IL-6 levels were lower in the GR groups (25 mg/kg; <math>63.620 \pm 7.942</math> pg/mL, 50 mg/kg; <math>36.143 \pm 6.652</math> pg/mL)</p>                                                                                                                                                                                                                                                                                                                                                                       | Jeon YD, Bang KS, Shin MK, et al. Regulatory effects of glycyrrhizae radix extract on DSS-induced ulcerative colitis. BMC Complement Altern Med. 16, 459 (2016).                                                           |
| 195 | GC(Prepared Licorice Decoction) | IL6       | -1 | <p>Prepared Licorice Decoction may promote the expression of IL-2 and IL-12 by inhibiting the expression of serum IL-1<math>\beta</math> and IL-6, regulate the immune function, reduce fatigue symptoms, and play the role of treating chronic fatigue syndrome</p>                                                                                                                                                                                                                                                | Liu Weicheng, Li Jiexuan, Guo Yongning, et al. Effects of Prepared Licorice Decoction on Behavioristics and 4 Kinds of IL in Rats with Chronic Fatigue Syndrome. Progress in Veterinary Medicine. 39, 70-73 (2018).        |



|     |                        |     |    |                                                                                                                                                                                                                                                                                                                                                                                                                                                                                                                                  |                                                                                                                                                                                         |
|-----|------------------------|-----|----|----------------------------------------------------------------------------------------------------------------------------------------------------------------------------------------------------------------------------------------------------------------------------------------------------------------------------------------------------------------------------------------------------------------------------------------------------------------------------------------------------------------------------------|-----------------------------------------------------------------------------------------------------------------------------------------------------------------------------------------|
| 196 | GC(Isoliquiritigenin)  | IL6 | -1 | Further analysis demonstrated that ISL not only downregulated IL-6 expression but also significantly decreased levels of phosphorylated ERK and STAT3 and could inhibit phosphorylation levels of ERK and STAT3 induced by recombinant human IL-6, which are critical signaling proteins in IL-6 signaling regulation networks.                                                                                                                                                                                                  | Chen X, Wu Y, Jiang Y, et al. Isoliquiritigenin inhibits the growth of multiple myeloma via blocking IL-6 signaling. <i>J Mol Med (Berl)</i> . 90,1311-9(2012).                         |
| 197 | GC(Isoliquiritigenin)  | IL6 | -1 | The increased expression of fibrosis markers ( $\alpha$ -SMA, FN, COL-1) and related inflammatory factors (CCL2, CD68, F4 / 80, TNF- $\alpha$ , and IL-6) in the model group were different degrees in the treatment group reduce. In HepG2 and L02 cells, the expression levels of CXCL9, CXCL10, CXCL11, and IL-6 increased after treatment with IFN- $\gamma$ . This high expression can be suppressed by ISL in a dose-dependent manner (IFN- $\gamma$ + 5 $\mu$ g / ml ISL Group vs IFN- $\gamma$ induction group, P <0.05) | He Lin. molecular mechanism of isoliquiritigenin in ameliorating experimental mouse chronic pancreatitis[D]. The Second Military Medical University. 2019.                              |
| 198 | GC(Isoliquiritigenin)  | IL6 | -1 | Magnesium isoglycyrrhizinate downregulates the expression of chemokines and their receptors CCL3, CCL5, CCL8, CCL11, CCL13, CCL19, CCL21, CXCL1, CXCL2, CXCL8, CCR1, CCR3, CCR4, CCR7, CXCR1, CXCR2 in gastric cancer tissues of mice; TLRs, MyD88, Tollip, NF- $\kappa$ b expression in mouse gastric cancer tissues; down-regulation of il1a, il1b, il1r1, il1rap, il1rn, il5, il6, il6r, il10, il10rb, il15, il17a, il18 in mouse gastric cancer tissues , Il22,                                                              | Wu Shanshan. The role of the isoliquiritigenin on the inflammation reaction of IFN- $\gamma$ -induced hepatocytes and its mechanism[D]. Zhejiang University. (2016).                    |
| 199 | GC(Isoglycyrrhizinate) | IL6 | -1 |                                                                                                                                                                                                                                                                                                                                                                                                                                                                                                                                  | Miao Yuqing. Anti-tumor mechanism of Magnesium Isoglycyrrhizinate in regulating the inflammatory microenvironment of Gastric Cancer[D]. The Second Military Medical University. (2017). |

il23a, il23r expression, up-regulated the expression of il2, il12

|     |                                           |                        |    |                                                                                                                                                                                                                                                     |                                                                                                                                                                                                                                                                     |
|-----|-------------------------------------------|------------------------|----|-----------------------------------------------------------------------------------------------------------------------------------------------------------------------------------------------------------------------------------------------------|---------------------------------------------------------------------------------------------------------------------------------------------------------------------------------------------------------------------------------------------------------------------|
| 200 | GC(Glycyrrhetic acid)                     | MAPK14 (P38 $\alpha$ ) | -1 | Glycyrrhetic acid may inhibit ionizing radiation-induced inflammation by inhibiting NADPH oxidase / ROS / p38MAPK signaling pathway                                                                                                                 | Su Li, Wang Qi, Huang Fei, et al. Effect of glycyrrhetic acid attenuating radiation-induced inflammation and its mechanism. Chinese Journal of Clinical Pharmacology and Therapeutics. 21,1088-1094(2016).                                                          |
| 201 | GC(flavonoids from Glycyrrhiza uralensis) | CASP3                  | -1 | flavonoids from Glycyrrhiza uralensis can resist the thioacetamide-induced hepatic fibrosis in rats. Its mechanism may be related to the downregulation of the protein expressions of TGF- $\beta$ 1 and Caspase-3.                                 | Jing Jing, Zhao Jinying, Hua Bing, et al. Inhibitory effect of flavonoids from Glycyrrhiza uralensis on expressions of TGF- $\beta$ 1 and Caspase-3 in thioacetamide-induced hepatic fibrosis in rats. China Journal of Chinese Materia Medica. 40,3034-3040(2015). |
| 202 | GC(Licochalcone A)                        | PTGS1(COX1)            | —  | Licochalcone A had no effect on COX-1-dependent PGE2 production, whereas indometacin (100 nM), a dual inhibitor of COX-1 and COX-2, was very effective.                                                                                             | Furuhashi I, Iwata S, Shibata S, et al. Inhibition by licochalcone A, a novel flavonoid isolated from liquorice root, of IL-1beta-induced PGE2 production in human skin fibroblasts. J Pharm Pharmacol. 57, 1661–1666(2005).                                        |
| 203 | GC(Isoliquiritigenin)                     | ICAM1                  | -1 | The effect of isoliquiritigenin in inhibiting gliomas may be related to reducing the expression of ICAM-1 and VCAM-1 in glioma rats                                                                                                                 | Cao Yang, Wang Yong, Dai Jinying, et al. Effect of Isoliquiritigenin on the expression of ICAM-1 and VCAM-1 in rat brain glioma. Progress of Anatomical Sciences. 22,513-515(2016).                                                                                 |
| 204 | GC(Prepared Licorice Decoction)           | IL1B(IL1 $\beta$ )     | -1 | Prepared licorice decoction may promote the expression of IL-2 and IL-12 by inhibiting the expression of serum IL-1 $\beta$ and IL-6, regulate the immune function, reduce fatigue symptoms, and play the role of treating chronic fatigue syndrome | Liu Weicheng, Li Jiexuan, Guo Yongning, et al. Effects of Prepared Licorice Decoction on Behavioristics and 4 Kinds of IL in Rats with Chronic Fatigue Syndrome. Progress in Veterinary Medicine. 39,70-73(2018).                                                   |
| 205 | GC(Glycyrrhizin)                          | IL1B(IL1 $\beta$ )     | -1 | glycyrrhizin significantly suppressed LPS-induced TNF- $\alpha$ , IL-1 $\beta$ , NO, and PGE2 production. Also, LPS-induced iNOS and COX-2 expression were attenuated by glycyrrhizin. Furthermore, glycyrrhizin                                    | Wang XR, Hao HG, Chu L. Glycyrrhizin inhibits LPS-induced inflammatory mediator production in endometrial epithelial cells. Microb Pathog. 109,110–113(2017).                                                                                                       |

|     |                                  |            |    |                                                                                                                                                                                                                                                                                                                                                                                                                                                                                                                                                                                                                                                                                                                                         |                                                                                                                                                                                         |
|-----|----------------------------------|------------|----|-----------------------------------------------------------------------------------------------------------------------------------------------------------------------------------------------------------------------------------------------------------------------------------------------------------------------------------------------------------------------------------------------------------------------------------------------------------------------------------------------------------------------------------------------------------------------------------------------------------------------------------------------------------------------------------------------------------------------------------------|-----------------------------------------------------------------------------------------------------------------------------------------------------------------------------------------|
| 206 | GC(Isoliquiritigenin(ISL))       | IL1B(IL1β) | -1 | <p>significantly attenuated TLR4 expression and NF-κB activation induced by LPS in MEEC.</p> <p>When stimulated by LPS for 12 h, the expression of TNF-α and IL-1β mRNA in the culture medium are reduced by ISL pre-treatment (P&lt;0.05). After LPS stimulation for 24 h, the expression of COX2 and iNOS mRNA and protein can be reduced (P&lt;0.05). After stimulated by LPS from 0.5 to 2 h, p-ERK expression has been decreased.</p>                                                                                                                                                                                                                                                                                              | FU Yan, YANG Pin, ZHAO Yang, XU Ying. Isoliquiritigenin suppresses microglial activation and neuroinflammation in primary microglia. <i>中国药理学与毒理学杂志</i> . 30, 1024 (2016).              |
| 207 | GC(Glycyrrhizin)                 | IL1B(IL1β) | -1 | <p>The results showed that glycyrrhizin significantly suppressed LPS-induced TNF-α, IL-1β, NO, and PGE2 production. Also, LPS-induced iNOS and COX-2 expression were attenuated by glycyrrhizin.</p> <p>Magnesium isoglycyrrhizinate downregulates the expression of chemokines and their receptors CCL3, CCL5, CCL8, CCL11, CCL13, CCL19, CCL21, CXCL1, CXCL2, CXCL8, CCR1, CCR3, CCR4, CCR7, CXCR1, CXCR2 in gastric cancer tissues of mice; TLRs, MyD88, Tollip, NF-κB expression in mouse gastric cancer tissues; down-regulation of il1a, il1b, il1r1, il1rap, il1rn, il5, il6, il6r, il10, il10rb, il15, il17a, il18 in mouse gastric cancer tissues, il22, il23a, il23r expression, up-regulated the expression of il2, il12</p> | Wang XR, Hao HG, Chu L. Glycyrrhizin inhibits LPS-induced inflammatory mediator production in endometrial epithelial cells. <i>Microb Pathog</i> . 109, 110–113 (2017).                 |
| 208 | GC(Magnesium isoglycyrrhizinate) | IL1B(IL1β) | -1 | <p>Magnesium isoglycyrrhizinate downregulates the expression of chemokines and their receptors CCL3, CCL5, CCL8, CCL11, CCL13, CCL19, CCL21, CXCL1, CXCL2, CXCL8, CCR1, CCR3, CCR4, CCR7, CXCR1, CXCR2 in gastric cancer tissues of mice; TLRs, MyD88, Tollip, NF-κB expression in mouse gastric cancer tissues; down-regulation of il1a, il1b, il1r1, il1rap, il1rn, il5, il6, il6r, il10, il10rb, il15, il17a, il18 in mouse gastric cancer tissues, il22, il23a, il23r expression, up-regulated the expression of il2, il12</p>                                                                                                                                                                                                      | Miao Yuqing. Anti-tumor mechanism of Magnesium Isoglycyrrhizinate in regulating the inflammatory microenvironment of Gastric Cancer[D]. The Second Military Medical University. (2017). |
| 209 | GC(Glycyrrhiza Uralensis)        | TP53 (P53) | —  | Glycyrrhiza Uralensis extract has no effect on p53 gene expression                                                                                                                                                                                                                                                                                                                                                                                                                                                                                                                                                                                                                                                                      | Ma Jing, Pang Daben. Apoptosis of Human Gastric Cancer Cell Line MGC-803 Induced by Glycyrrhiza Uralensis Extract. <i>Chinese</i>                                                       |

|     |                                                    |            |    |                                                                                                                                                                                                                                                                       |                                                                                                                                                                                                                                                                                                                                                                                                                                                                                                         |
|-----|----------------------------------------------------|------------|----|-----------------------------------------------------------------------------------------------------------------------------------------------------------------------------------------------------------------------------------------------------------------------|---------------------------------------------------------------------------------------------------------------------------------------------------------------------------------------------------------------------------------------------------------------------------------------------------------------------------------------------------------------------------------------------------------------------------------------------------------------------------------------------------------|
|     | extract)                                           |            |    |                                                                                                                                                                                                                                                                       | Journal of Integrated Traditional and Western Medicine.20,928-930(2000).                                                                                                                                                                                                                                                                                                                                                                                                                                |
| 210 | GC(Diammonium glycyrrhizinate (DG))                | TP53 (P53) | +1 | Diammonium glycyrrhizinate (DG) has obvious cytotoxicity and proliferation inhibition effect on human hepatocellular carcinoma SMMC-7721. The mechanism may be related to up-regulation of p53 expression.                                                            | Zhang Jianfeng, Li Hao, Li Chaoqian, et al. Effect of diammonium glycyrrhizinate on proliferation in liver cancer cell SMMC-7721 and p53 expression. Chongqing Medicine.41, 2852-2853(2012)                                                                                                                                                                                                                                                                                                             |
| 211 | GC(Glycyrrhizic acid)                              | TP53 (P53) | -1 | glycyrrhizic acid can slow down the process of liver fibrosis, and its molecular mechanism may be related to the down-regulation of p53 protein expression                                                                                                            | Cao Qin, Cai Yu, Guo Xiaoling, et al. Effects of glycyrrhizic acid on the expression of p53 protein in rat liver fibrosis induced by CC14.Chinese Journal of Digestion and Medical Imageology(Electronic Edition).16-19(2014).<br>Kim SC, Byun SH, Yang CH, et al. Cytoprotective effects of Glycyrrhizae radix extract and its active component liquiritigenin against cadmium-induced toxicity (effects on bad translocation and cytochrome c-mediated PARP cleavage). Toxicology. 197,239-51(2004) . |
| 212 | GC(Glycyrrhizae radix extract)                     | BCL2       | +1 | Glycyrrhizae radix extract (GRE) blocks Cd-induced cell death by inhibiting the transfer of Bad to mitochondria, the reduction of mitochondrial Bcl (xL) and cytochrome c, and the cleavage of poly ADP ribose polymerase.                                            | Cheng Ruifeng, Hua Bing, Jing Jing, et al, .Modulation of the apoptotic protein expression in hippocampus is associated with the antidepressant effects of licorice flavonoids from Glycyrrhiza uralensis in rats.Pharmacology and Clinics of Chinese Materia Medica.30,69-72(2014).                                                                                                                                                                                                                    |
| 213 | GC(Licorice flavonoids from Glycyrrhiza uralensis) | BCL2       | +1 | licorice flavonoids from Glycyrrhiza uralensis can significantly improve the stress and depression behavior of CUS rats; the expression of Bcl-xl protein in hippocampus is significantly increased, and the expression of Caspase-3 protein is significantly reduced | Zhao Shiyuan, nongzhixin, Zhong Zhenguo, et al.Experimental study on antitumor effect of the total flavonoids from radix glycyrrhizae and its mechanisms.Guangxi Medical Journal.1496-1499(2006).                                                                                                                                                                                                                                                                                                       |
| 214 | GC(the total flavonoids from radix glycyrrhizae)   | BCL2       | -1 | the total flavonoids from radix glycyrrhizae in each group can significantly inhibit the growth of S180 mouse sarcoma. Immunohistochemistry showed that the expression of Bcl-2 protein in mouse tumor tissue                                                         |                                                                                                                                                                                                                                                                                                                                                                                                                                                                                                         |

was down-regulated, while the expression of Bax protein was up-regulated

|     |                                |              |    |                                                                                                                                                                                                                                                                                                                                                                            |                                                                                                                                                                                                                                |
|-----|--------------------------------|--------------|----|----------------------------------------------------------------------------------------------------------------------------------------------------------------------------------------------------------------------------------------------------------------------------------------------------------------------------------------------------------------------------|--------------------------------------------------------------------------------------------------------------------------------------------------------------------------------------------------------------------------------|
| 215 | GC(Glycyrrhizin)               | TGFB1(TGFβ1) | -1 | 1000μmol / L glycyrrhizin can inhibit TGF-β1 secreted by hepatic stellate cells in the supernatant                                                                                                                                                                                                                                                                         | Dong Ling. Effects of glycyrrhizin on TGF-β / smad signal transduction in hepatic stellate cells in rats[D]. Fudan University.(2005).                                                                                          |
| 216 | GC(18α glycyrrhizin)           | TGFB1(TGFβ1) | -1 | 18α GL can significantly reduce the transcription and protein levels of TGF-β1, Smad2, and Smad3 in liver fibrosis tissue. Immunohistochemistry also found that 18α GL can reduce the expression of phosphorylated Smad2, phosphorylated Smad3, and transcription factor SP-1 without With significant changes in Smad7                                                    | Qu Ying. Effects of 18α glycyrrhizin on liver collagen and TGFβ1 / Smad signaling pathway [D]. (2012).                                                                                                                         |
| 217 | GC(Diammonium glycyrrhizinate) | TGFB1(TGFβ1) | -1 | Diammonium glycyrrhizinate can reduce the level of TGF-β1 secreted by AECII induced by PQ.                                                                                                                                                                                                                                                                                 | Xiang Li, Fang Chen, Zhou Zhibing, et al. Effects of diammonium glycyrrhizinate on the expression of TGF-β1 in alveolar epithelial cell IIcultured with paraquat. The Journal of Practical Medicine.034, 2320-2323,2328(2018). |
| 218 | GC(Gancaoganjiang Decotion)    | TGFB1(TGFβ1) | -1 | After 28 days of action, Gancao Ganjiang Decotion can significantly increase the activity of superoxide dismutase in rat lung tissue, reduce the content of reactive oxygen species, malondialdehyde and hydroxyproline, and at the same time, significantly downregulate TGF-β1, Smad3, α-SMA, ColI And SIRT1 protein expression and up-regulate Smad7 protein expression | Lu Guohui, Li yanru, Gao Jianmei. Gancaoganjiang Decotion inhibit bleomycin induced pulmonary fibrosis through regulating SIRT1 and TGF-β1 exprssion. Pharmacology and Clinics of Chinese Materia Medica. 25-28(2014).         |
| 219 | GC(Guizhi Gancao Decotion)     | TGFB1(TGFβ1) | -1 | Guizhi Gancao Decotion can effectively protect myocardial function in rats with heart failure caused by coronary artery ligation, and its mechanism may be                                                                                                                                                                                                                 | Shen Dongdong. Effects of Guizhi Gancao Decotion on Myocardial Apoptosis and Expression of TGF-β1 and ICAM-1 in Myocardial Cells of Rats with Chronic Heart Failure. Chinese                                                   |

|     |                                      |              |    |                                                                                                                                                                                                                                                                                                                                                                                                                                                                                                                                                                                                                                                                                                                                                                   |                                                                                                                                                                                                                                                       |
|-----|--------------------------------------|--------------|----|-------------------------------------------------------------------------------------------------------------------------------------------------------------------------------------------------------------------------------------------------------------------------------------------------------------------------------------------------------------------------------------------------------------------------------------------------------------------------------------------------------------------------------------------------------------------------------------------------------------------------------------------------------------------------------------------------------------------------------------------------------------------|-------------------------------------------------------------------------------------------------------------------------------------------------------------------------------------------------------------------------------------------------------|
| 220 | GC(Glycyrrhizin)                     | TGFB1(TGFβ1) | -1 | <p>related to its anti-lipid oxidation, scavenging oxygen free radicals and down-regulating the expression of TGF-β1 and ICAM-1</p> <p>From the protein and mRNA levels, it was confirmed that glycyrrhizin has a significant inhibitory effect on the expression of TGFβ1 protein and mRNA, and has an early protective effect on rat glomerulosclerosis, which provides a basis for clinical application.</p> <p>MG can significantly reduce airway hyperresponsiveness, inhibit the expression of IL-4, IL-5 and IL-13 in BALF and lung tissue, reduce the expression of blood EOS and serum IgE, and reduce the inflammation and collagen deposition of lung tissue. Further results indicate that MG can inhibit the expression of TGF-β1 in lung tissue</p> | <p>Archives of Traditional Chinese Medicine.036, 932-935(2018).</p> <p>Huang Yihui, Yu Li, Zhang Lei,et al.Protective effects of glycyrrhizin on experimental transforming growth factorβ1.Progress in Modern Biomedicine.9,3262-3265+3192(2009).</p> |
| 221 | GC(Mahuang-Gancao Couplet Medicines) | TGFB1(TGFβ1) | -1 | <p>MG can significantly reduce airway hyperresponsiveness, inhibit the expression of IL-4, IL-5 and IL-13 in BALF and lung tissue, reduce the expression of blood EOS and serum IgE, and reduce the inflammation and collagen deposition of lung tissue. Further results indicate that MG can inhibit the expression of TGF-β1 in lung tissue</p>                                                                                                                                                                                                                                                                                                                                                                                                                 | <p>Yuan Weiyuan, Wei pan, Bao Kaifan,et al.Effects and Mechanism of Mahuang-Gancao Couplet Medicines on Allergic Asthma.Journal of Nanjing University of Traditional Chinese Medicine.36,41-45(2020).</p>                                             |
| 222 | GC(Glycyrrhizic acid)                | MAPK1(ERK2)  | -1 | <p>Asthmatic mice have ERK1 / 2 and p38 MAPK signaling pathways activated, and glycyrrhizin can inhibit ERK1 / 2 and p38 MAPK signaling pathways in asthmatic mice</p> <p>Magnesium isoglycyrrhizinate downregulates the expression of chemokines and their receptors CCL3, CCL5, CCL8, CCL11, CCL13, CCL19, CCL21, CXCL1, CXCL2, CXCL8, CCR1, CCR3, CCR4, CCR7, CXCR1, CXCR2 in gastric cancer tissues of mice; TLRs, MyD88, Tollip, NF-κb expression in mouse gastric cancer tissues; down-regulation of il1a,</p>                                                                                                                                                                                                                                              | <p>Zhang Wuyue, Gu Yongchun, Tang Ying, et al.Effects of glycyrrhizic acid on ERK1/2 and p38 MAPK signaling pathway in a murine model of asthma.National Medical Journal of China.98,1273-1278(2018).</p>                                             |
| 223 | GC(Magnesium isoglycyrrhizinate)     | CXCL8(IL8)   | -1 | <p>Magnesium isoglycyrrhizinate downregulates the expression of chemokines and their receptors CCL3, CCL5, CCL8, CCL11, CCL13, CCL19, CCL21, CXCL1, CXCL2, CXCL8, CCR1, CCR3, CCR4, CCR7, CXCR1, CXCR2 in gastric cancer tissues of mice; TLRs, MyD88, Tollip, NF-κb expression in mouse gastric cancer tissues; down-regulation of il1a,</p>                                                                                                                                                                                                                                                                                                                                                                                                                     | <p>Miao Yuqing. Anti-tumor mechanism of Magnesium Isoglycyrrhizinate in regulating the inflammatory microenvironment of Gastric Cancer[D].The Second Military Medical University.(2017).</p>                                                          |

|     |                                 |            |    |                                                                                                                                                                                                                                                                                                                                                                                                                                                                                                                                                                                                                                                                                          |                                                                                                                                                                                                              |
|-----|---------------------------------|------------|----|------------------------------------------------------------------------------------------------------------------------------------------------------------------------------------------------------------------------------------------------------------------------------------------------------------------------------------------------------------------------------------------------------------------------------------------------------------------------------------------------------------------------------------------------------------------------------------------------------------------------------------------------------------------------------------------|--------------------------------------------------------------------------------------------------------------------------------------------------------------------------------------------------------------|
| 224 | GC(Prepared licorice decoction) | CRP        | -1 | <p>il1b, il1r1, il1rap, il1rn, il5, il6, il6r, il10, il10rb, il15, il17a, il18 in mouse gastric cancer tissues , Il22, il23a, il23r expression, up-regulated the expression of il2, il12</p> <p>Effect of Prepared licorice decoction on Coronary Heart Disease with Arrhythmia</p> <p>If it is accurate, it can effectively reduce the patient's serum hs-CRP, TNF-<math>\alpha</math>, IL-8 levels.</p>                                                                                                                                                                                                                                                                                | <p>Jin Cunwang.Prepared licorice decoction for the Treatment of Coronary Heart Disease with Arrhythmia .Considerations of Contemporary Medicine.17,192-193( 2019).</p>                                       |
| 225 | GC(Isoliquiritigenin)           | CCL2       | -1 | <p>The increased expression of fibrosis markers (<math>\alpha</math>-SMA, FN, COL-1) and related inflammatory factors (CCL2, CD68, F4 / 80, TNF-<math>\alpha</math>, and IL-6) in the model group were different degrees in the treatment group reduce. Compared with the control group, the isoliquiritigenin group significantly induced apoptosis of HCT116 cells in a concentration-dependent manner (P &lt;0.05), significantly increased the expression of cleaved caspase-3 protein (P &lt;0.05), and significantly inhibited the invasion and migration of HCT116 cells (P &lt;0.05), significantly down-regulate pJNK / JNK, pERK1 / 2 / ERK1 / 2, pP38 / P38 (P &lt; 0.05)</p> | <p>He Lin. molecular mechanism of isoliquiritigenin in ameliorating experimental mouse chronic pancreatitis[D].The Second Military Medical University.(2019) .</p>                                           |
| 226 | GC(Isoliquiritigenin)           | MAPK8      | -1 | <p>After treatment with Licochalcone B from Glycyrrhizin uralensis, the expression of genes related to the death receptor pathway at the mRNA level (TNF, TNF-R1, Caspase8, Caspases 8, Fas, FasL, FOS, JUN) and at the protein level (TNF-R1, Fas , Caspases 8)</p>                                                                                                                                                                                                                                                                                                                                                                                                                     | <p>Wang Zhiguo, Huang Xianming, Zhao Yan, et al.Effects of isoliquiritigenin on proliferation, invasion and migration of colorectal cancer cells.Chinese Traditional Patent Medicine.41,1800-1805(2019).</p> |
| 227 | GC(Licochalcone A and B)        | FOS(C-FOS) | +1 | <p>After treatment with Licochalcone B from Glycyrrhizin uralensis, the expression of genes related to the death receptor pathway at the mRNA level (TNF, TNF-R1, Caspase8, Caspases 8, Fas, FasL, FOS, JUN) and at the protein level (TNF-R1, Fas , Caspases 8)</p>                                                                                                                                                                                                                                                                                                                                                                                                                     | <p>Wang Jun. Licochalcone A and B from Glycyrrhizin uralensis: Extraction, Anti-cancerous potential and the Molecular Mechanism [D].Hefei University of Technology.(2019).</p>                               |

|     |                                                         |               |    |                                                                                                                                                                                                                                                                                                                                                                                                                                |                                                                                                                                                                                                                                                          |
|-----|---------------------------------------------------------|---------------|----|--------------------------------------------------------------------------------------------------------------------------------------------------------------------------------------------------------------------------------------------------------------------------------------------------------------------------------------------------------------------------------------------------------------------------------|----------------------------------------------------------------------------------------------------------------------------------------------------------------------------------------------------------------------------------------------------------|
| 228 | GC(Licoricidin)                                         | FOS(C-FOS)    | -1 | <p>The expression is up-regulated</p> <p>Mechanistically, this appeared to be due to licoricidin-dependent inhibition of mitogen-activated protein kinases ( MAPK ) phosphorylation, which resulted in decreased c-Jun activation and reduced c-Jun and c-Fos expression.</p> <p>Conclusion</p> <p>Licoricidin blocks UVA -induced photoaging via ROS scavenging. This activity converges to limit the activity of MMP -1.</p> | <p>K. J. Kim,S. H. Xuan,S. N. Park. Licoricidin, an isoflavonoid isolated from Glycyrrhiza uralensis Fisher, prevents UVA -induced photoaging of human dermal fibroblasts. International Journal of Cosmetic Science.39,(2017).</p>                      |
| 229 | GC(18β-glycyrrhetic acid sodium (18β-SGA))              | IL4           | -1 | <p>18β-glycyrrhetic acid sodium (18β-SGA) may play an anti-inflammatory role by inhibiting the activity of the NF-κB signaling pathway, reducing the expression of NF-κBp50, and down-regulating serum IL-4 levels</p>                                                                                                                                                                                                         | <p>Li Li, Wang Youhu, Hou Yun, et al.Effects of 18beta-solidum glycyrrhetic acid on nuclear factor-kappaBp50 of nasal mucosa and IL-4 of serum in rats with allergic rhinitis.Journal of Xi'an Jiaotong University(Medical Sciences).41,58-63(2020).</p> |
| 230 | GC(Licorzinc granules combined with loratadine tablets) | IL4           | -1 | <p>Treatment of chronic urticaria patients with licorzinc granules combined with loratadine tablets can effectively reduce IL-4 and IL-10 levels and improve Th1 / Th2 cell imbalance</p>                                                                                                                                                                                                                                      | <p>Zhang Li.Study on the Effect of Combined Use of Licorzinc Granules and Loratadine Tablets in Treating Chronic Urticaria on IL-4 and IL-10.Health Guide.221(2018).</p>                                                                                 |
| 231 | GC(Magnesium isoglycyrrhizinate)                        | IL1A<br>IL-1α | -1 | <p>Magnesium isoglycyrrhizinate downregulates the expression of chemokines and their receptors CCL3, CCL5, CCL8, CCL11, CCL13, CCL19, CCL21, CXCL1, CXCL2, CXCL8, CCR1, CCR3, CCR4, CCR7, CXCR1, CXCR2 in gastric cancer tissues of mice; TLRs, MyD88, Tollip, NF-κb expression in mouse gastric cancer tissues; down-regulation of il1a, il1b, il1r1, il1rap, il1rn, il5, il6, il6r, il10, il10rb, il15,</p>                  | <p>Miao Yuqing. Anti-tumor mechanism of Magnesium Isoglycyrrhizinate in regulating the inflammatory microenvironment of Gastric Cancer[D].The Second Military Medical University.(2017).</p>                                                             |



|     |                              |        |    |                                                                                                                                                                                                                                                                                                                                                                                                                                                                                                                  |                                                                                                                                                                                                                               |
|-----|------------------------------|--------|----|------------------------------------------------------------------------------------------------------------------------------------------------------------------------------------------------------------------------------------------------------------------------------------------------------------------------------------------------------------------------------------------------------------------------------------------------------------------------------------------------------------------|-------------------------------------------------------------------------------------------------------------------------------------------------------------------------------------------------------------------------------|
|     |                              |        |    | il17a, il18 in mouse gastric cancer tissues , Il22, il23a, il23r expression, up-regulated the expression of il2, il12                                                                                                                                                                                                                                                                                                                                                                                            |                                                                                                                                                                                                                               |
| 232 | GC(Glycyrrhizin (GL))        | STAT1  | -1 | glycyrrhizin (GL) may block IFN- $\gamma$ -mediated JAK / STAT1 signal activation, thereby inhibiting IFN- $\gamma$ -induced HaXaT cell secretion of CXCL10                                                                                                                                                                                                                                                                                                                                                      | Xu Manyuan, min Zhongsheng, Wei Yuegang.Glycyrrhizin inhibits IFN- $\gamma$ -induced CXCL10 by suppressing the JAK/STAT1 signal pathway in HaCaT cells.Chinese Journal of Cellular and Molecular Immunology.34,708-713(2018). |
| 233 | GC(Licorzinc granules)       | EGFR   | +1 | Licorzinc granules can protect gastric tissue and accelerate ulcer healing by decreasing ulcer index of gastric ulcer rats model and increasing expressions of EGF and EGFR protein in the gastric tissue. After treatment, the expression levels of EGFR and EGF in the gastric mucosa of the two groups of patients were higher than before treatment, P <0.05; the expression levels of EGFR and EGF in the gastric mucosa of the experimental group were higher than those of the reference group, P <0.05 . | Deng Shaobo, Bai Guang.Effect of Licorzinc Granules on Ulcer Healing and Expressions of EGF and EGFR in Gastric Ulcer Model in Rats.Liaoning Journal of Traditional Chinese Medicine.37,556-559(2010).                        |
| 234 | GC(Shaoyao Gancao Decoction) | EGFR   | +1 | In HepG2 and L02 cells, the expression levels of CXCL9, CXCL10, CXCL11 and IL-6 increased after treatment with IFN- $\gamma$ . This high expression can be suppressed by ISL (isoglycyrrhizin) in a dose-dependent (IFN- $\gamma$ + 5 $\mu$ g / mlISL group vs IFN- $\gamma$ induced group, P <0.05)                                                                                                                                                                                                             | Du Guofu.Analysis of the Effect of Shaoyao Gancao Decoction on Acute Gastric Ulcer.Contemporary Medical Symposium.16,138-140(2018).                                                                                           |
| 235 | GC(Isoliquiritigenin)        | CXCL10 | -1 | After adding licorice, the activities of superoxide dismutase, peroxidase and malondialdehyde in the liver of crucian carp were lower than those in the                                                                                                                                                                                                                                                                                                                                                          | Wu Shanshan. The role of the isoliquiritigenin on the inflammation reaction of IFN- $\gamma$ -induced hepatocytes and its mechanism[D].Zhejiang University.(2016).                                                            |
| 236 | GC(Licorice)                 | SOD1   | -1 |                                                                                                                                                                                                                                                                                                                                                                                                                                                                                                                  | Wang Shifeng, Xu Ping, gulimire anwair, et al.Effect of Licorice on Antioxidant Enzyme Activity in Hepatopancreas and Micronucleus Number in Red Blood Cell of Crucian Carp Carassius auratus                                 |

|     |                                 |             |    |                                                                                                                                                                                                                                                                                                                                                                                                                                                                                                                                                                                                                           |                                                                                                                                                                                                                                                                                             |
|-----|---------------------------------|-------------|----|---------------------------------------------------------------------------------------------------------------------------------------------------------------------------------------------------------------------------------------------------------------------------------------------------------------------------------------------------------------------------------------------------------------------------------------------------------------------------------------------------------------------------------------------------------------------------------------------------------------------------|---------------------------------------------------------------------------------------------------------------------------------------------------------------------------------------------------------------------------------------------------------------------------------------------|
| 237 | GC(Zhigancao decoction)         | SOD1        | +1 | <p>copper-added group.</p> <p>Zhigancao decoction can significantly increase the activity of SOD in blood (P &lt;0.01) and reduce the content of MDA and ROS (P &lt;0.01)</p>                                                                                                                                                                                                                                                                                                                                                                                                                                             | <p>exposed to Cu<sup>2+</sup> Stress.Fisheries Science.33,713-717(2014).</p> <p>Yuan Jie.The Effects of Zhi Gan Cao Decoction on the Left Cardiac Function and Antioxidative Enzymes in Ischemia-Reperfusion Injured Rats.Lishizhen Medicine and Materia Medica Research.411-412(2008).</p> |
| 238 | GC(Licorice extract)            | PARP1       | +1 | <p>Western blot results showed that with the increase of the action time of licorice extract (GC-3) (25μg / ml), PARP-1 was activated and sheared, and the expression level of its cleaved protein Cleaved-PARP-124 kD increased accordingly, and From 6 h, there is a significant difference from the normal control group (P &lt;0.05), showing a significant time-effect relationship</p> <p>Compared with the control group, cells in the G2 / M phase of the 18β-GA and A30 groups were significantly increased, caspase-8 protein level was significantly increased, and Bcl2 level was significantly decreased</p> | <p>Shang Xiaoyun, Li Xin, Yu Bo, et al.The studies on apoptosis of HeLa cells induced by licorice extract in vitro and related molecular mechanism.Chinese Journal of Clinicians(Electronic Edition).10798-10801(2013).</p>                                                                 |
| 239 | GC(18β-glycyrrhetic acid)       | CASP8       | +1 | <p>The level of IFN-γ in patients with alopecia areata was significantly higher than that in the healthy control group (P &lt;0.05) .There was no significant difference in the level of IL-4 compared with the healthy control group. , IL-4 level did not change significantly before treatment</p>                                                                                                                                                                                                                                                                                                                     | <p>Zhong Like.18β-glycyrrhetic acid piperazine derivative A30 inhibits the proliferation of SMMC-7721 hepatoma cells.Chinese Journal of Cellular and Molecular Immunology.33,1212-1216(2017).</p>                                                                                           |
| 240 | GC(Compound glycyrrhizin)       | IFNG(IFN-γ) | -1 | <p>Prepared Licorice Decoction may promote the expression of IL-2 and IL-12 by inhibiting the expression of serum IL-1β and IL-6, regulate the immune function, reduce fatigue symptoms, and play</p>                                                                                                                                                                                                                                                                                                                                                                                                                     | <p>Teng Wei, Wei Li, Bi Chunxia,et al.Effect of compound glycyrrhizin on serum cytokines IFN-γ and IL-4 in patients with alopecia areata.China Journal of Leprosy and Skin Diseases.27,694-695(2011).</p>                                                                                   |
| 241 | GC(Prepared Licorice Decoction) | IL2         | +1 | <p>Prepared Licorice Decoction may promote the expression of IL-2 and IL-12 by inhibiting the expression of serum IL-1β and IL-6, regulate the immune function, reduce fatigue symptoms, and play</p>                                                                                                                                                                                                                                                                                                                                                                                                                     | <p>Liu Weicheng, Li Jiexuan, Guo Yongning,et al.Effects of Prepared Licorice Decoction on Behavioristics and 4 Kinds of IL in Rats with Chronic Fatigue Syndrome.Progress in Veterinary Medicine.39,70-73(2018).</p>                                                                        |

|     |                                            |      |    |                                                                                                                                                                                                                                                                                                                                                                                                                                                                                                                                                                                       |                                                                                                                                                                                                                                                                        |
|-----|--------------------------------------------|------|----|---------------------------------------------------------------------------------------------------------------------------------------------------------------------------------------------------------------------------------------------------------------------------------------------------------------------------------------------------------------------------------------------------------------------------------------------------------------------------------------------------------------------------------------------------------------------------------------|------------------------------------------------------------------------------------------------------------------------------------------------------------------------------------------------------------------------------------------------------------------------|
| 242 | GC(Magnesium Isoglycyrrhizinate)           | IL2  | +1 | the role of treating chronic fatigue syndrome<br>Magnesium isoglycyrrhizinate downregulates the expression of chemokines and their receptors CCL3, CCL5, CCL8, CCL11, CCL13, CCL19, CCL21, CXCL1, CXCL2, CXCL8, CCR1, CCR3, CCR4, CCR7, CXCR1, CXCR2 in gastric cancer tissues of mice; TLRs, MyD88, Tollip, NF- $\kappa$ b expression in mouse gastric cancer tissues; down-regulation of il1a, il1b, il1r1, il1rap, il1rn, il5, il6, il6r, il10, il10rb, il15, il17a, il18 in mouse gastric cancer tissues, Il22, il23a, il23r expression, up-regulated the expression of il2, il12 | Miao Yuqing. Anti-tumor mechanism of Magnesium Isoglycyrrhizinate in regulating the inflammatory microenvironment of Gastric Cancer[D].The Second Military Medical University.(2017).                                                                                  |
| 243 | GC                                         | CAT  | /  |                                                                                                                                                                                                                                                                                                                                                                                                                                                                                                                                                                                       |                                                                                                                                                                                                                                                                        |
| 244 | GC(Water Extract of Glycyrrhiza uralensis) | IL10 | +1 | Water Extract of Glycyrrhiza uralensis can alleviate acute liver injury induced by triptolide, the mechanism may be related to down-regulation of pro-inflammatory factor TNF- $\alpha$ expression and up-regulation of anti-inflammatory factor IL-10<br>Compared with the model group, different concentrations of glycyrrhizic acid can significantly increase the activities of SOD, GSH and CAT (P <0.01), and significantly reduce the expression of IL-1 $\beta$ , IL-6, and TNF- $\alpha$ (P <0.05, P < 0.01)                                                                 | Zhu Shengnan, Zhang Jing, Tan relatives and friends,et al.Improvement Effects of Water Extract of Glycyrrhiza uralensis on Acute Hepatic Injury Caused by Triptolide and Its Effects on the Levels of IL-10 and TNF- $\alpha$ in Rats.China Pharmacy.30,216-220(2019). |
| 245 | GC(Glycyrrhizic Acid)                      | IL10 | +1 |                                                                                                                                                                                                                                                                                                                                                                                                                                                                                                                                                                                       | Zhang Lihong, Fu Yun, Wang yeqiu, et al.Protective Role of Glycyrrhizic Acid on Light Aging Cells of HaCaT and Its Influence to Inflammatory Cytokines.Information on Traditional Chinese Medicine.35,9-12(2018).                                                      |
| 246 | GC(Magnesium Isoglycyrrhizinate)           | IL10 | -1 | Magnesium isoglycyrrhizinate downregulates the expression of chemokines and their receptors CCL3, CCL5, CCL8, CCL11, CCL13, CCL19, CCL21,                                                                                                                                                                                                                                                                                                                                                                                                                                             | Miao Yuqing. Anti-tumor mechanism of Magnesium Isoglycyrrhizinate in regulating the inflammatory microenvironment of Gastric Cancer[D].The Second Military Medical                                                                                                     |

|     |                                                  |             |    |                                                                                                                                                                                                                                                                                                                                                                                                                                                                                                                                                                               |                                                                                                                                                                                                       |
|-----|--------------------------------------------------|-------------|----|-------------------------------------------------------------------------------------------------------------------------------------------------------------------------------------------------------------------------------------------------------------------------------------------------------------------------------------------------------------------------------------------------------------------------------------------------------------------------------------------------------------------------------------------------------------------------------|-------------------------------------------------------------------------------------------------------------------------------------------------------------------------------------------------------|
| 247 | GC                                               | HMOX1       | /  | CXCL1, CXCL2, CXCL8, CCR1, CCR3, CCR4, CCR7, CXCR1, CXCR2 in gastric cancer tissues of mice; TLRs, MyD88, Tollip, NF-κb expression in mouse gastric cancer tissues; down-regulation of il1a, il1b, il1r1, il1rap, il1rn, il5, il6, il6r, il10, il10rb, il15, il17a, il18 in mouse gastric cancer tissues , Il22, il23a, il23r expression, up-regulated the expression of il2, il12                                                                                                                                                                                            | University.(2017).                                                                                                                                                                                    |
| 248 | GC(the total flavonoids from radix glycyrrhizae) | BAX         | +1 | the total flavonoids from radix glycyrrhizae in each group can significantly inhibit the growth of S180 mouse sarcoma. Immunohistochemistry showed that the expression of Bcl-2 protein in mouse tumor tissue was down-regulated, while the expression of Bax protein was up-regulated<br>FFE inhibited COX-2 expression in LPS-stimulated RAW 264.7 cells.In addition, the expression levels of iNOS protein in RAW 264.7 cells were evaluated. As shown in Fig. 7, FFE effectively inhibited iNOS expression, which was in-line with its observed effects on NO production. | Zhao Shiyuan, nongzhixin, Zhong Zhenguo, et al.Experimental study on antitumor effect of the total flavonoids from radix glycyrrhizae and its mechanisms.Guangxi Medical Journal.1496-1499(2006).     |
| 249 | LQ(methanol extract of forsythia fructus)        | PTGS2(COX2) | +1 | FFE inhibited COX-2 expression in LPS-stimulated RAW 264.7 cells.In addition, the expression levels of iNOS protein in RAW 264.7 cells were evaluated. As shown in Fig. 7, FFE effectively inhibited iNOS expression, which was in-line with its observed effects on NO production.                                                                                                                                                                                                                                                                                           | Lee SE, Lim C, Kim H, Cho S.A study of the anti-inflammatory effects of the ethyl acetate fraction of the methanol extract of forsythia fructus.Afr J Tradit Complement Altern Med 13, 102-113(2016). |
| 250 | LQ(methanol extract of forsythia fructus)        | iNOS        | +1 | FFE inhibited COX-2 expression in LPS-stimulated RAW 264.7 cells.In addition, the expression levels of iNOS protein in RAW 264.7 cells were evaluated. As shown in Fig. 7, FFE effectively inhibited iNOS expression, which was in-line with its observed effects on NO production.                                                                                                                                                                                                                                                                                           | Lee SE, Lim C, Kim H, Cho S.A study of the anti-inflammatory effects of the ethyl acetate fraction of the methanol extract of forsythia fructus.Afr J Tradit Complement Altern Med 13, 102-113(2016). |

|     |                     |                       |    |                                                                                                                                                                                                                                                                                                                                                                                                                                                                                                                                                                                                                                                                                                                                                                                                                                                                                                                                                                                                                                                                                                                                                                                                                                                                                                                                                                                                   |                                                                                                                                                                                                                                                                                                                                          |
|-----|---------------------|-----------------------|----|---------------------------------------------------------------------------------------------------------------------------------------------------------------------------------------------------------------------------------------------------------------------------------------------------------------------------------------------------------------------------------------------------------------------------------------------------------------------------------------------------------------------------------------------------------------------------------------------------------------------------------------------------------------------------------------------------------------------------------------------------------------------------------------------------------------------------------------------------------------------------------------------------------------------------------------------------------------------------------------------------------------------------------------------------------------------------------------------------------------------------------------------------------------------------------------------------------------------------------------------------------------------------------------------------------------------------------------------------------------------------------------------------|------------------------------------------------------------------------------------------------------------------------------------------------------------------------------------------------------------------------------------------------------------------------------------------------------------------------------------------|
| 251 | LQ                  | RELA(P65, NF-KB3)     | -1 | <p>effects on NO production.</p> <p>Forsythia 3. 5 g/kg can significantly inhibit rat feeding kaolin chemotherapy, improve the gastrointestinal mucosa pathological damage, reduce chemotherapy rats serum TNF-<math>\alpha</math>, IL-1<math>\beta</math>, PGE2 levels, inflammatory markers and PGE2 by gastric antrum and ileum in the organization the NF-<math>\kappa</math>B p65 and gastric antrum COX-2 positive expression</p> <p>This study focused on the effect of antipyretic and detoxification Chinese medicine honeysuckle forsythiae on TNF-<math>\alpha</math> induced SV40 MES 13 NF-<math>\kappa</math>B signaling pathway, and explored the effective mechanism of antipyretic and detoxification Chinese medicine in the treatment of kidney disease. TNF-<math>\alpha</math> significantly promoted the proliferation of SV40MES 13 (P&lt;0.05 or P&lt;0.01), and the drug treatment group inhibited the proliferation of SV40MES 13 (P&lt;0.01).</p> <p>ELISA results showed that the protein expression of cytoplasm p-I<math>\kappa</math>B<math>\alpha</math> and nucleus NF-<math>\kappa</math>Bp65 was significantly decreased in the groups treated with different drugs(Honeysuckle Bud and Flower, forsythia fructus, Dandelion) (p &lt;0.01), and the contents of McP-1 and Il-6 in the supernatant of cell culture were significantly reduced (p &lt;0.01).</p> | <p>Meng Qi, Zhang Tian, Li Mengjiao et al. Study on the prevention and treatment of chemotherapy-induced nausea and vomiting by Forsythia suspensa and its anti-inflammatory activity. <i>Pharmacol Clin Chin Mater Med</i> 35, 125-130(2019).</p>                                                                                       |
| 252 | LQ                  | TNF                   | -1 | <p>This study focused on the effect of antipyretic and detoxification Chinese medicine honeysuckle forsythiae on TNF-<math>\alpha</math> induced SV40 MES 13 NF-<math>\kappa</math>B signaling pathway, and explored the effective mechanism of antipyretic and detoxification Chinese medicine in the treatment of kidney disease. TNF-<math>\alpha</math> significantly promoted the proliferation of SV40MES 13 (P&lt;0.05 or P&lt;0.01), and the drug treatment group inhibited the proliferation of SV40MES 13 (P&lt;0.01).</p> <p>ELISA results showed that the protein expression of cytoplasm p-I<math>\kappa</math>B<math>\alpha</math> and nucleus NF-<math>\kappa</math>Bp65 was significantly decreased in the groups treated with different drugs(Honeysuckle Bud and Flower, forsythia fructus, Dandelion) (p &lt;0.01), and the contents of McP-1 and Il-6 in the supernatant of cell culture were significantly reduced (p &lt;0.01).</p>                                                                                                                                                                                                                                                                                                                                                                                                                                         | <p>Yao Yuanzhang, Zhang Min, Cao Peng. The Influence of the Heat -clearing and Detoxifying Herbs to NF -<math>\kappa</math>B Signaling Pathway in the Glomerular Mesangial Cells of Mice Induced by TNF-<math>\alpha</math>. <i>Chinese journal of integrated traditional and western medicine nephropathy</i> 14, 1047-1050(2013).</p>  |
| 253 | LQ                  | IL6                   | -1 | <p>ELISA results showed that the protein expression of cytoplasm p-I<math>\kappa</math>B<math>\alpha</math> and nucleus NF-<math>\kappa</math>Bp65 was significantly decreased in the groups treated with different drugs(Honeysuckle Bud and Flower, forsythia fructus, Dandelion) (p &lt;0.01), and the contents of McP-1 and Il-6 in the supernatant of cell culture were significantly reduced (p &lt;0.01).</p>                                                                                                                                                                                                                                                                                                                                                                                                                                                                                                                                                                                                                                                                                                                                                                                                                                                                                                                                                                              | <p>Yao Yuanzhang, Zhang Min, Cao Peng. The Influence of the Heat — clearing and Detoxifying Herbs to NF -<math>\kappa</math>B Signaling Pathway in the Glomerular Mesangial Cells of Mice Induced by TNF-<math>\alpha</math>. <i>Chinese journal of integrated traditional and western medicine nephropathy</i> 14, 1047-1050(2013).</p> |
| 254 | LQ(Forsythiaside A) | MAPK14(P38 $\alpha$ ) | -1 | <p>To investigate the effects of forsythiaside A( FSA) on airway inflammation in asthmatic mice, and to explore</p>                                                                                                                                                                                                                                                                                                                                                                                                                                                                                                                                                                                                                                                                                                                                                                                                                                                                                                                                                                                                                                                                                                                                                                                                                                                                               | <p>Lin Xing, Li Junfeng, Che Nan et al. Forsythiaside A suppresses airway inflammation of asthma through inhibition of p38 MAPK</p>                                                                                                                                                                                                      |

|     |                     |             |    |                                                                                                                                                                                                                                                                                                                                                                                                                                                               |                                                                                                                                                                      |
|-----|---------------------|-------------|----|---------------------------------------------------------------------------------------------------------------------------------------------------------------------------------------------------------------------------------------------------------------------------------------------------------------------------------------------------------------------------------------------------------------------------------------------------------------|----------------------------------------------------------------------------------------------------------------------------------------------------------------------|
|     |                     |             |    | its possible mechanism of action. Conclusion: FSA could inhibit airway inflammation in asthmatic mice, and its mechanism may be related to inhibition of p38 MAPK/NF-κB signaling pathway.                                                                                                                                                                                                                                                                    | /NF-kappa B signaling pathway. Chinese journal of immunology 35, 2971-2974+2979(2019).                                                                               |
| 255 | LQ(Phillyrin)       | CASP3       | -1 | The alcohol-induced hepatocyte injury was alleviated by concentration of forsythia .DAPI staining results showed that forsythia could significantly reverse alcohol-induced liver nucleus concentration and nuclear disintegration, and the expression of apoptosis-related proteins PARP and caspase 3 was also significantly inhibited.                                                                                                                     | Liu Yinhua, Qi Zhilin, Xu Guoxiang et al. Protective effect of phillyrin on alcoholic liver injury. Chinese clinical pharmacology and therapeutics 21, 6-9+15(2016). |
| 256 | LQ                  | PTGS1(COX1) | /  |                                                                                                                                                                                                                                                                                                                                                                                                                                                               |                                                                                                                                                                      |
| 257 | LQ                  | ICAM1       | /  |                                                                                                                                                                                                                                                                                                                                                                                                                                                               |                                                                                                                                                                      |
| 258 | LQ(Forsythiaside A) | IL1B(IL1β)  | -1 | Test showed that LPS can induce chicken spleen lymphocytes IL-1β protein and mRNA expression quantity increases, and forsythiaside A group prevention chicken spleen lymphocytes IL-1β protein and mRNA expression decreased, show forsythiaside A can inhibit LPS through transcription and translation way in chicken spleen lymphocytes induced by IL-1β protein and mRNA expression quantity rise, reduce inflammation, exert anti-inflammatory function. | Cheng Guangdong, Zhang Qiang, Guan Nannan. Effect of forsythiaside A on IL-1β of spleen lymphocyte induced by endotoxin in chicken. Feed Research 10-13+17(2017).    |
| 259 | LQ(Phillyrin)       | TP53(P53)   | -1 | In the phillyrin(PHN)(2, 5, 10 mg/ml) group, the cell activity and the expression levels of PCNA,                                                                                                                                                                                                                                                                                                                                                             | Luo Shan, Huo Yongxin, Liu Ying et al. Effect of phillyrin on IL-1β induced apoptosis of human articular chondrocytes and                                            |

|     |                                                |              |    |                                                                                                                                                                                                                                                                                                                                                                                                                                           |                                                                                                                                                                                                                                    |
|-----|------------------------------------------------|--------------|----|-------------------------------------------------------------------------------------------------------------------------------------------------------------------------------------------------------------------------------------------------------------------------------------------------------------------------------------------------------------------------------------------------------------------------------------------|------------------------------------------------------------------------------------------------------------------------------------------------------------------------------------------------------------------------------------|
|     |                                                |              |    | BCL-2 and PARP proteins were significantly increased, and the apoptosis rate and the expression levels of p53, Bad, Bax and cl-caspase-3 were significantly decreased.                                                                                                                                                                                                                                                                    | extracellular matrix degradation. Journal of Immunology 35, 645-652, 658(2019).                                                                                                                                                    |
| 260 | LQ(Forsythia extract)                          | BCL2         | -1 | Alcohol extract from forsythia root can up-regulate Bax, Bad and Noxa, and down-regulate the expression of Bcl-2, Bcl-xl and McL-1, thus inducing the apoptosis of esophageal cancer cells<br>Forsythin inhibits inflammatory response in diabetic nephropathy rats, alleviates renal tissue damage, and has a protective effect on diabetic nephropathy rats, and the mechanism of action is related to inhibition of TGF-β1 expression. | Zhao Lianmei, Sun Jiawei, Yan Xi et al.Study on the anti-esophageal cancer effect of components extracted from different parts of forsythia in wuan county, hebei province.The fourth hospital of hebei medical university (2016). |
| 261 | LQ(Phillyrin)                                  | TGFB1(TGFβ1) | -1 |                                                                                                                                                                                                                                                                                                                                                                                                                                           | Leng Wei, Liu Chunying, Shang Cheng et al.Potective effect and mechanism of phillyrin on diabetic nephropathy rats.Chinese journal of immunology 35, 2604-2608(2019).                                                              |
| 262 | LQ(ethanol extract of Forsythia suspensa root) | MAPK1        | -1 | The alcohol extract from forsythia root down-regulated the expression of p-JAK, p-STAT3, and p-ERK proteins in the JAK/STAT and ERK signaling pathways                                                                                                                                                                                                                                                                                    | Yan Xi.Experimental study on the antitumor and immunomodulatory effects of alcohol extract from forsythia root.Hebei: Hebei medical university (2012).                                                                             |
| 263 | LQ(Phillyrin)                                  | CXCL8(IL8)   | -1 | ELISA showed that when forsythin was 50 mg·L <sup>-1</sup> , the levels of TNF- and IL-8 secreted by human mononuclear macrophages stimulated by staphylococcus aureus were significantly increased (P < 0.05), and the inhibitory effect was more obvious as the concentration of forsythin increased (P < 0.001, P < 0.01), showing a concentration-dependent relationship.                                                             | Wang Jiahe. Wan Xiaoxu. Liu Dan. The inhibitory effect of forsythin on the inflammatory response of human mononuclear macrophages stimulated by staphylococcus aureus. Journal of Xinxiang Medical College 33, 466-468(2016).      |
| 264 | LQ(Qinlian)                                    | CRP          | -1 | The 118 patients with pneumonia were divided into the                                                                                                                                                                                                                                                                                                                                                                                     | Li Jing, Lv Zhichao, Ren Hongna. Effects of Qinlian Qiaopi                                                                                                                                                                         |

|     |                      |            |    |                                                                                                                                                                                                                                                                                                                                                                                                                                                                                                                                                                                                                                                                                                                                                                                                                                                             |                                                                                                                                                                              |
|-----|----------------------|------------|----|-------------------------------------------------------------------------------------------------------------------------------------------------------------------------------------------------------------------------------------------------------------------------------------------------------------------------------------------------------------------------------------------------------------------------------------------------------------------------------------------------------------------------------------------------------------------------------------------------------------------------------------------------------------------------------------------------------------------------------------------------------------------------------------------------------------------------------------------------------------|------------------------------------------------------------------------------------------------------------------------------------------------------------------------------|
|     | Qiaopi Recipe )      |            |    | <p>observation group (Qinlian Qiaopi Recipe) and the control group (conventional western medicine). Compared with the two groups before treatment, serum levels of HsCRP, PCT, IL-8 and TNF-<math>\alpha</math> decreased significantly after treatment (P &lt;0. 05), and the observation group was significantly lower than the control group (P&lt;0. 05 or P &lt;0. 01).</p> <p>Tannic acid, at nontoxic concentrations, specifically inhibited CXCL12-induced human monocyte migration (IC(50), 7.5 micro g/ml) but did not inhibit CCL2-, CCL3-, CCL5-, formylmethionylleucylphenylalanine (fMLP)-, or C5a-induced migration. The compound markedly blocked CXCL12 binding to THP-1 cells (IC(50), 0.36 micro g/ml). Tannic acid also inhibited CXCL12-induced, but not epidermal growth factor-induced, migration of MDA 231 breast tumor cells.</p> | <p>Recipe Combined with Western Medicine on Blood Routine and Inflammatory Factors in Patients with Pneumonia. World Chinese Medicine14, 2737-2740(2019).</p>                |
| 265 | LQ                   | CCL2       | —  |                                                                                                                                                                                                                                                                                                                                                                                                                                                                                                                                                                                                                                                                                                                                                                                                                                                             |                                                                                                                                                                              |
| 266 | LQ                   | MAPK8      | /  |                                                                                                                                                                                                                                                                                                                                                                                                                                                                                                                                                                                                                                                                                                                                                                                                                                                             |                                                                                                                                                                              |
| 267 | LQ(Forsythiaside A ) | FOS(C-FOS) | -1 | <p>In vitro experiments, we found that Forsythiaside A inhibited osteoclast differentiation and bone resorption, and down-regulated the expression of osteoclast marker genes, including C-FOS and NFATC1</p>                                                                                                                                                                                                                                                                                                                                                                                                                                                                                                                                                                                                                                               | <p>Sun Xuewu. Discussion on the mechanism of Forsythiaside A inhibiting osteoclast differentiation and its therapeutic application. Zhejiang University (2018).</p>          |
| 268 | LQ(Phillyrin)        | IL4        | 1  | <p>Results: the glomerular swelling and basement membrane thickening of diabetic nephropathy rats were significantly reduced after treatment with phillyrin. The</p>                                                                                                                                                                                                                                                                                                                                                                                                                                                                                                                                                                                                                                                                                        | <p>Leng Wei, Liu Chunying, Shang Cheng et al.Potective effect and mechanism of phillyrin on diabetic nephropathy rats.Chinese journal of immunology 35, 2604-2608(2019).</p> |



contents of urea nitrogen, creatinine, uric acid and urinary albumin were significantly reduced. The levels of interleukin 4(IL-4), IL-6, IL-18, IL-1, tumor necrosis factor  $\alpha$ (TNF- $\alpha$ ), and monocyte chemotactic protein 1(McP-1) in renal tissue were significantly increased.

|     |                     |                         |    |                                                                                                                                                                                                                                                                                                                                                                                         |                                                                                                                                                                                                                                                                 |
|-----|---------------------|-------------------------|----|-----------------------------------------------------------------------------------------------------------------------------------------------------------------------------------------------------------------------------------------------------------------------------------------------------------------------------------------------------------------------------------------|-----------------------------------------------------------------------------------------------------------------------------------------------------------------------------------------------------------------------------------------------------------------|
| 269 | LQ                  | IL1A(IL-1<br>$\alpha$ ) | /  |                                                                                                                                                                                                                                                                                                                                                                                         |                                                                                                                                                                                                                                                                 |
| 270 | LQ(Forsythioside A) | STAT1                   | +1 | In the treatment group of forsythioside A, the expression of IFN- $\gamma$ was induced. In addition, changes in STAT1 protein expression were consistent with this, suggesting that forsythioside A induced IFN-1 May regulate the expression of smad7 by activating the STAT1 signaling pathway.                                                                                       | Zhao Hailei. Gao Lei. Lu Yan et al. Effect of forsythioside A induced IFN- $\gamma$ and inhibition of TGF- $\beta$ 1/Smads signaling pathway on renal tubulointerstitial fibrosis. <i>Chinese Association of Animal Science and Veterinary Medicine</i> (2013). |
| 271 | LQ                  | EGFR                    | /  |                                                                                                                                                                                                                                                                                                                                                                                         |                                                                                                                                                                                                                                                                 |
| 272 | LQ                  | CXCL10                  | /  |                                                                                                                                                                                                                                                                                                                                                                                         |                                                                                                                                                                                                                                                                 |
| 273 | LQ(Forsythin)       | SOD1(SOD)               | +1 | To study the antiaging effect of forsythin on aging model mice. Compared with the model group, the quality enhancement rate and spleen index of the mice in the high, medium and low dose forsythin groups increased. The activities of SOD, GSH-Px and T-AOC in serum and liver tissue of mice in the high and medium dose groups were enhanced, and the content of MDA was decreased. | Yan Liyou, Liu Mingjuan, Yan Huiru et al. Study on the anti-aging effect of forsythin in mice. <i>Chinese pharmacy</i> 26, 37-39(2015).                                                                                                                         |
| 274 | LQ                  | PARP1                   | /  |                                                                                                                                                                                                                                                                                                                                                                                         |                                                                                                                                                                                                                                                                 |
| 275 | LQ                  | CASP8                   | /  |                                                                                                                                                                                                                                                                                                                                                                                         |                                                                                                                                                                                                                                                                 |

|     |                                  |                      |    |                                                                                                                                                                                                                                                                                                                                                                                                                                                                               |                                                                                                                                                                                           |
|-----|----------------------------------|----------------------|----|-------------------------------------------------------------------------------------------------------------------------------------------------------------------------------------------------------------------------------------------------------------------------------------------------------------------------------------------------------------------------------------------------------------------------------------------------------------------------------|-------------------------------------------------------------------------------------------------------------------------------------------------------------------------------------------|
| 276 | LQ                               | IFNG(IFN- $\gamma$ ) | /  |                                                                                                                                                                                                                                                                                                                                                                                                                                                                               |                                                                                                                                                                                           |
| 277 | LQ(Jingjie Lianqiao Decoction)   | IL2                  | +1 | The amount of serum TNF- $\alpha$ in patients with UC significantly decreased and the level of IL-2 significantly increased with the modified Jingjie Lianqiao Decoction, and the difference in its regulatory effect was statistically significant compared with that of the control group (P<0.05)                                                                                                                                                                          | Zhang Yanjun. Regulating effect of modified Jingjie Lianqiao Decoction on Serum TNF- $\alpha$ and IL-2 in Patients with Ulcerative Colitis. Shandong J Tradit Chin Med 35, 966-968(2016). |
| 278 | LQ(water extract from forsythia) | CAT                  | +1 | ater extract from forsythia taishan can significantly improve the phagocytosis rate and phagocytosis index of aging model mice. Significantly reduced MDA content and increased GSH-Px, SOD and CAT activity                                                                                                                                                                                                                                                                  | Li Teng, Li Yalin, He Hao et al. Study on the antiaging effect of water extract from forsythia taishan. Journal of tai shan Medical College 38, 1223-1225(2017).                          |
| 279 | LQ(Forsythia extract)            | IL10                 | —  | Forsythia suspense extract can promot proliferation of PLP135-151-specific lymphocytes and decreased the secretion of IFN- $\gamma$ , but had no effect on the secretion of IL-10.                                                                                                                                                                                                                                                                                            | Xing Guangyu, Yin Ling.Effect of forsythia suspense extract on the proliferation and secretion of PLP135-151-specific T cell.China J Neuroimmunol & Neurol 19, 105-107+120(2012).         |
| 280 | LQ(Forsythiaside A)              | IL10                 | -1 | Compared with the normal control group, the Treg, Foxp3, IL-10 and TGF- $\beta$ 1 of the endotoxemia model group improved significantly ( P<0.01) .With the treatment of forsythiaside A, the abnormal changes reduced in a dose-dependent manner.Result of high doses of the drug was more obvious but similar to that of the control group ( P>0.05) .Forsythiaside A has significant immunomodulatory effects and its therapeutic mechanism for endotoxemia may be related | Yuan Wei, Yang Hui, Xie Yong et al.Effect of forsythiaside A on regulatory T cells in mice with systemic endotoxemia.Chinese Traditional Patent Medicine 36, 1584-1588(2014).             |

|     |                                 |             |    |                                                                                                                                                                                                                                                                                                                                                                                                                                                                                                                                                                                                                                                                                                          |                                                                                                                                                                                                                                                |
|-----|---------------------------------|-------------|----|----------------------------------------------------------------------------------------------------------------------------------------------------------------------------------------------------------------------------------------------------------------------------------------------------------------------------------------------------------------------------------------------------------------------------------------------------------------------------------------------------------------------------------------------------------------------------------------------------------------------------------------------------------------------------------------------------------|------------------------------------------------------------------------------------------------------------------------------------------------------------------------------------------------------------------------------------------------|
|     |                                 |             |    | to the regulation of Treg, interference of Foxp3 gene expression and secretion of cytokine IL-10 and TGF- $\beta$ 1.                                                                                                                                                                                                                                                                                                                                                                                                                                                                                                                                                                                     |                                                                                                                                                                                                                                                |
| 281 | LQ(Phillyrin)                   | HMOX1       | +1 | Compared with the young control group, the content of protein in urine increased significantly in the aged control group. The expression of Nrf 2, HO-1 and NQO- 1 decreased significantly(P<0.01).<br>The results showed that Forsythia suspense flavonoids(FF) significantly inhibited the proliferation and colony formation of MGC80-3 cells, and its molecular mechanism was that FF down-regulated the protein level of mTOR and up-regulated the expressions of Bax as well as cellular autophagy factor Beclin 1 and LC3II, which promoted the autophagic cell death, then inhibiting the survival of MGC80-3 cells. Therefore, FF possesses the potential value for developing anti-tumor drug. | Yang Jieling, Li Shen, Liu Qing et al. Effects of forsythoside on oxidative stress and renal function in aged rats. Chinese journal of clinical anatomy 37, 77-82(2019).                                                                       |
| 282 | LQ(Total flavones in forsythia) | BAX         | +1 | Reporter gene assays showed that Mao reduced LPS-inducible NF-kappaB-dependent transcription that plays a crucial role in induction of COX-2 gene expression.<br>Five mostly studied herbs, including Ephedra Herba, Amygdalus communis Vas, Platycodon grandiforus, Licorice and Scutellariae Radix, were selected from the literature. Of importance, we found that TNF, $\beta$ 2AR and PTGS2 play pivotal role in TCM mediated                                                                                                                                                                                                                                                                       | Li Ping, Zhang Guiping, Hu Jianran. Effects of Total Flavonoids from Forsythia suspense on the Proliferation of Gastric Cancer Cell MGC80-3. Biotechnology bulletin 34, 199-203(2018).                                                         |
| 283 | MH                              | PTGS2(COX2) | -1 |                                                                                                                                                                                                                                                                                                                                                                                                                                                                                                                                                                                                                                                                                                          | Aoki K, Yamakuni T, Yoshida M, Ohizumi Y. Ephedrae herba decreases lipopolysaccharide-induced cyclooxygenase-2 protein expression and NF-kappaB-dependent transcription in C6 rat glioma cells. J Pharmacol Sci 98, 327-330(2005).             |
| 284 | MH                              | PTGS2(COX2) | -1 |                                                                                                                                                                                                                                                                                                                                                                                                                                                                                                                                                                                                                                                                                                          | Jian hong Sun, Fei Sun, Bin Yan, Jun yi Li, De li Xin. Data mining and systematic pharmacology to reveal the mechanisms of traditional Chinese medicine in Mycoplasma pneumoniae pneumonia treatment. Biomedicine & Pharmacotherapy 125(2020). |

|     |                              |           |    |                                                                                                                                                                                                                                                                                                                                                                                                                                                                                                                                                                                                                                                                                         |                                                                                                                                                                                                                                                                                                                                                                                                                                                                                   |
|-----|------------------------------|-----------|----|-----------------------------------------------------------------------------------------------------------------------------------------------------------------------------------------------------------------------------------------------------------------------------------------------------------------------------------------------------------------------------------------------------------------------------------------------------------------------------------------------------------------------------------------------------------------------------------------------------------------------------------------------------------------------------------------|-----------------------------------------------------------------------------------------------------------------------------------------------------------------------------------------------------------------------------------------------------------------------------------------------------------------------------------------------------------------------------------------------------------------------------------------------------------------------------------|
| 285 | MH(Ephedra methanol extract) | iNOS      | -1 | <p>MPP inhibition.</p> <p>In the case of COX2, the mRNA levels were not significantly lowered in response to either of the utilized aqueous extract concentrations. Interestingly, about 50–60% of COX2 mRNA levels were lost in response to either of the added ethanolic extract concentrations. However, the methanolic extract was less efficient, as only about 15% of COX2 mRNA levels were absent in response to 50 µg/ml but not 100 µg/ml of extract. In the case of iNOS, the 3 different extracts were efficient in terms of impairing iNOS transcription, with methanolic extract being the most efficient, followed by ethanolic extract, and finally aqueous extract.</p> | Kallassy H, Fayyad-Kazan M, Makki R, et al. Chemical Composition and Antioxidant, Anti-Inflammatory, and Antiproliferative Activities of Lebanese Ephedra Campylopoda Plant. <i>Med Sci Monit Basic Res</i> 23, 313-325(2017).                                                                                                                                                                                                                                                    |
| 286 | MH                           | RELA(P65) | -1 | <p>The protein content of NF-κB p65 decreased in high and low dose groups of ephedra.</p> <p>Ephedra, dried ginger, scutellaria baicalensis and white mulberry skin can interfere with lung heat syndrome and inhibit the expression of TNF-α, IL-1β inflammatory cytokines, which may be the main ways to reduce lung tissue damage caused by lung heat syndrome in mice.</p>                                                                                                                                                                                                                                                                                                          | <p>Yangping, Jin Suan, Che Lijuan et al. Study on the expression changes of TLR2 and NF-κB in mice with lung heat syndrome after 4 kinds of traditional Chinese medicines. <i>China Journal of Chinese Materia Medica</i> 39, 3359-3362(2014).</p> <p>Yangping, Jin Suan, Che Lijuan et al. Effects of Four Chinese Herbs Belong to Lung on Expression of TNF-α and IL-1β in Mice with Lung Heat Syndrome. <i>Chinese journal of experimental formulae</i> 20, 162-166(2014).</p> |
| 287 | MH                           | TNF       | -1 | <p>The protein content of NF-κB p65 decreased in high and low dose groups of ephedra.</p> <p>Ephedra, dried ginger, scutellaria baicalensis and white mulberry skin can interfere with lung heat syndrome and inhibit the expression of TNF-α, IL-1β inflammatory cytokines, which may be the main ways to reduce lung tissue damage caused by lung heat syndrome in mice.</p>                                                                                                                                                                                                                                                                                                          | <p>Yangping, Jin Suan, Che Lijuan et al. Effects of Four Chinese Herbs Belong to Lung on Expression of TNF-α and IL-1β in Mice with Lung Heat Syndrome. <i>Chinese journal of experimental formulae</i> 20, 162-166(2014).</p>                                                                                                                                                                                                                                                    |
| 288 | MH(Mahuang Lianqiao Chidou)  | IL6       | -1 | <p>After treatment, serum IL-6, IL-8, TNF-α and hs-CRP levels were significantly lower than those before</p>                                                                                                                                                                                                                                                                                                                                                                                                                                                                                                                                                                            | Jiang Wei, Xue Qin, Li Jie et al. Clinical Efficacy of Addition and Subtraction of Mahuang Lianqiao Chidou Decoction in                                                                                                                                                                                                                                                                                                                                                           |

|     |                               |                           |    |                                                                                                                                                                                                                                                                                                                                                                                                                                                                                                                                                                                                                                                      |                                                                                                                                                                                                    |
|-----|-------------------------------|---------------------------|----|------------------------------------------------------------------------------------------------------------------------------------------------------------------------------------------------------------------------------------------------------------------------------------------------------------------------------------------------------------------------------------------------------------------------------------------------------------------------------------------------------------------------------------------------------------------------------------------------------------------------------------------------------|----------------------------------------------------------------------------------------------------------------------------------------------------------------------------------------------------|
|     |                               | Decoction)                |    | treatment in two groups, and the levels in observation group were significantly lower than those in control group ( $P < 0.05$ ).<br>Altogether 23 active ingredients were screened and 156 targets were obtained. Epidermal active growth factor receptor ( EGFR ), E-selectin ( SELE ), macrophage migration inhibitory factor ( MIF ), mitogen-activated protein kinase 14 ( MAPK14 ) might be the important anti-inflammatory targets of ephedra treatment of asthma. All these pathways had epithelial cell signaling pathways.                                                                                                                 | Treatment of Patients with Damp-heat Cough Syndrome. <i>PLA medical journal</i> 31, 85-88(2019).                                                                                                   |
| 289 | MH                            | MAPK14(<br>P38 $\alpha$ ) | -1 |                                                                                                                                                                                                                                                                                                                                                                                                                                                                                                                                                                                                                                                      | Chen ou, Li Guoyong, Liu Aihong. Anti-inflammatory mechanism of ephedra treatment of asthma based on network pharmacology. <i>Journal of shandong university: medical science</i> 57, 69-75(2019). |
| 290 | MH                            | CASP3                     | /  |                                                                                                                                                                                                                                                                                                                                                                                                                                                                                                                                                                                                                                                      |                                                                                                                                                                                                    |
| 291 | MH                            | PTGS1(C<br>OX1)           | -1 | Ethanol extracts of <i>Artemisia persica</i> (IC50: 0.5 $\mu$ g/mL), <i>Dragocephalum paulsenii</i> (IC50: 0.5 $\mu$ g/mL), <i>Ephedra intermedia</i> (IC50: 3.8 $\mu$ g/mL), <i>Hyoscyamus pusillus</i> , <i>Nepeta parmiriensis</i> (IC50: 0.7 $\mu$ g/mL) and <i>Rumex patientia</i> subsp. <i>pamiricus</i> (IC50: 3.5 $\mu$ g/mL) exhibited the best COX-1 inhibitory effect (Table 2).<br>C3 positive expression, MPO activity, and ICAM-1 mRNA level were significantly weaker in the <i>Ephedra sinica</i> group than in the control group at all time points (12 h, day 1, day 3, day 7, and day 14 after SCI) ( $P < 0.01$ , $P < 0.05$ ). | Jeppesen AS, Soelberg J, Jäger AK. Antibacterial and COX-1 Inhibitory Effect of Medicinal Plants from the Pamir Mountains, Afghanistan. <i>Plants (Basel)</i> 1, 74-81(2012).                      |
| 292 | MH                            | ICAM1                     | -1 |                                                                                                                                                                                                                                                                                                                                                                                                                                                                                                                                                                                                                                                      | Li LM, Zhu Y. <i>Zhongguo Zhong Xi Yi Jie He Za Zhi</i> . 2012;32(10):1385–1389.                                                                                                                   |
| 293 | MH(cassia twig<br>and ephedra | IL1B(IL1<br>$\beta$ )     | -1 | ELISA showed that TNF- $\alpha$ , IL-6 and IL-1 $\beta$ expression levels in the prefrontal cortex and hippocampus were                                                                                                                                                                                                                                                                                                                                                                                                                                                                                                                              | Xu Liangkui. The mechanisms of post-ischemic neuroinflammation regulated by <i>Ramulus Cinnamomi</i> - <i>Herba Ephedrae</i> based on                                                              |

significantly increased after modeling ( $P < 0.05$ ) however, by osmanthus twig - ephedra (6 and 12g/kg,  $P < 0.05$ ) significant reduction of TNF- $\alpha$ , IL-6 and IL-1 $\beta$  levels after treatment suggested that cassia twig - ephedra (6 and 12 g/kg, i.g.) significantly inhibited the rise of TNF- $\alpha$ , IL-6 and IL-1 $\beta$  levels

TLR4/MyD88/MAPK pathway. Southern Medical University (2018).

|     |    |                      |   |
|-----|----|----------------------|---|
| 294 | MH | TP53(P53)            | / |
| 295 | MH | BCL2                 | / |
| 296 | MH | TGFB1(TGF $\beta$ 1) | / |

|     |                                       |       |    |
|-----|---------------------------------------|-------|----|
| 297 | MH(Modified Shegan Mahuang Decoction) | MAPK1 | -1 |
|-----|---------------------------------------|-------|----|

The mechanism of inhibiting airway remodeling by adding or subtracting ephedrine decoction may be to reduce the level of PCNA and inhibit the expression levels of ERK, p-ERK and PCNA proteins and inhibit the proliferation of airway smooth muscle, so as to improve the airway remodeling in asthmatic rats

Wang Jing, Zhang Bo. Effects of Modified Shegan Mahuang Decoction on Airway Remodeling and PCNA and ERK in Lung Tissue of Asthmatic Rats. Journal of emergency in traditional Chinese medicine 27, 950-95(2018).

|     |               |            |    |
|-----|---------------|------------|----|
| 298 | MH(Ephedrine) | CXCL8(IL8) | -1 |
|-----|---------------|------------|----|

Ephedrine can inhibit the expression and secretion of IL-8 in 16HBE induced by TNF- $\alpha$ , which may be one of the mechanisms of ephedrine in the treatment of asthma.

Li Zhongyan, Deng Bing, Xiong Bin et al. Effect of ephedrine on expression of interleukin - 8 in human bronchial epithelial cells. Shandong Medical Journal 56, 950-954(2018).

|     |    |     |    |
|-----|----|-----|----|
| 299 | MH | CRP | -1 |
|-----|----|-----|----|

Seventy-three patients in the combined group were treated with Mahuang decoction plus budesonide, In the single drug group, 70 patients were treated with budesonide alone. The PCT value and hs-crp value of the combined group were lower than that of the single

drug group

|     |                                      |                                      |    |                                                                                                                                                                                                                                                                                                                        |                                                                                                                                                                                                                                      |
|-----|--------------------------------------|--------------------------------------|----|------------------------------------------------------------------------------------------------------------------------------------------------------------------------------------------------------------------------------------------------------------------------------------------------------------------------|--------------------------------------------------------------------------------------------------------------------------------------------------------------------------------------------------------------------------------------|
| 300 | MH                                   | CCL2(monocyte chemotactic protein-1) | -1 | Meanwhile, EsM transplantation significantly reduced gene expression of proinflammatory cytokines interleukin-1 and monocyte chemotactic protein-1.                                                                                                                                                                    | Wang JH, Kim BS, Han K, Kim H. Ephedra-Treated Donor-Derived Gut Microbiota Transplantation Ameliorates High Fat Diet-Induced Obesity in Rats. <i>Int J Environ Res Public Health</i> 14, 555(2017).                                 |
| 301 | MH                                   | MAPK8                                | /  |                                                                                                                                                                                                                                                                                                                        |                                                                                                                                                                                                                                      |
| 302 | MH(Ephedrine)                        | FOS(C-FOS)                           | +1 | The mean absorbance value of C-FOS and caspase-3 protein expression in the lung tissues of the ephedrine group was significantly increased.                                                                                                                                                                            | Peng Jing, Li Chongyang, Liu Tingting et al. Effects of ephedrine on lung tissue structure in mice. <i>Acta Anatomica Sinica</i> 47, 521-527(2016).                                                                                  |
| 303 | MH                                   | IL4                                  | -1 | Ephedra and asarum are both effective drugs in xiaoqinglong decoction, which can reduce the level of IL-4 and increase the level of IFN- $\gamma$ .                                                                                                                                                                    | Shao Lijie, Tang Fang. Effects of ephedra and asarum on allergic rhinitis in rats. <i>Information on Traditional Chinese Medicine</i> 36, 47-49(2019).                                                                               |
| 304 | MH                                   | IL1A(IL-1 $\alpha$ )                 | /  |                                                                                                                                                                                                                                                                                                                        |                                                                                                                                                                                                                                      |
| 305 | MH (water extract of ephedra)        | STAT1                                | —  | Ephedrine water extract has an obvious regulatory effect on airway inflammation in asthmatic guinea pigs, and its mechanism may be related to the inhibition of il-5 expression and inflammatory cell accumulation, but ephedrine cannot effectively inhibit the expression of STAT1 and abnormal signal transduction. | Xiong Ying, Xiong Bin, Wang Songping et al. The effect of aqueous extract of ephedra on the airway inflammation and epithelial STAT1 expression of guinea pig with asthma. <i>Med J West China</i> 41, 2206-2211(2018).              |
| 306 | MH (Ephedra and Bitter Apricot Seed) | EGFR                                 | -1 | Ephedrine - almond medicine has the best effect on the down-regulation of EGFR mRNA in medicated intestinal absorption solution. N6A showed the best effect in down-regulating the expression of PI3K mRNA, EGFR protein and the total cell damage rate.                                                               | Xu Zhao, Wang Zhan, Zhou Kaifang et al. Effects of ephedrine - almond on the expression of EGFR and PI3K in histamine rat model of airway epithelial cell damage. <i>Journal of Chinese Medicinal Materials</i> 41, 2206-2211(2018). |

|     |                              |                      |    |                                                                                                                                                                                                                      |                                                                                                                                                                                                                                |
|-----|------------------------------|----------------------|----|----------------------------------------------------------------------------------------------------------------------------------------------------------------------------------------------------------------------|--------------------------------------------------------------------------------------------------------------------------------------------------------------------------------------------------------------------------------|
| 307 | MH                           | CXCL10               | /  |                                                                                                                                                                                                                      |                                                                                                                                                                                                                                |
| 308 | MH(Ephedrine)                | SOD1                 | ±1 | The activity of SOD and CAT in the lung tissues of ephedrine group was temporarily increased at 5d and significantly decreased at 10d and 15d.                                                                       | Peng Jing, Li Chongyang, liu Tingting et al. Effects of ephedrine on lung tissue structure in mice. <i>Acta Anatomica Sinica</i> 47, 521-527(2016).                                                                            |
| 309 | MH                           | PARP1                | /  |                                                                                                                                                                                                                      |                                                                                                                                                                                                                                |
| 310 | MH                           | CASP8                | /  |                                                                                                                                                                                                                      |                                                                                                                                                                                                                                |
| 311 | MH                           | IFNG(IFN- $\gamma$ ) | /  |                                                                                                                                                                                                                      |                                                                                                                                                                                                                                |
| 312 | MH(Mahuangjia zhu Decoction) | IL2                  | +1 | Both ephedrine and ribavirin significantly increased the content of IL-2 and IFN- $\gamma$ in mice (P<0.001), but there was no significant difference in the content of IL-2 between the Chinese and western groups. | Li Junlian, li Yanyan, Gao Peng et al. Effect of Mahuangjiazhu decoction on serum IL-2 and IFN- $\gamma$ in mice infected with respiratory syncytial virus. <i>Chinese journal of experimental formulae</i> 19, 196-199(2013). |
| 313 | MH(Ephedrine)                | CAT                  | ±1 | The activity of SOD and CAT in the lung tissues of ephedrine group was temporarily increased at 5d and significantly decreased at 10d and 15d.                                                                       | Peng Jing, Li Chongyang, liu Tingting et al. Effects of ephedrine on lung tissue structure in mice. <i>Acta Anatomica Sinica</i> 47, 521-527(2016).                                                                            |
| 314 | MH(Ephedrine)                | CAT                  |    | The plasma activity of CK and CK-MB in ephedrine group was higher than that in control group (P < 0.01), and the activity of T-AOC and CAT in cardiac tissue was decreased.                                          | Liu Tingting, Peng Jing, Li Chongyang. Effects of ephedrine on histological structure, activities of total antioxidant capacity and catalase in the myocardial tissue of mice. <i>Acat anatomica sinica</i> 47, 516-520(2016). |
| 315 | MH(Ephedrine)                | CAT                  | -1 | Compared with the normal saline group, the contents of MDA and NO in the frontal cortex of the ephedrine group were significantly increased, and the activities of SOD, CAT and GSH-PX were significantly decreased. | Zheng Fanghao, Luo Jiabo. Ma Huang ( Ephedra) induces oxidative stress in the rat prefrontal cortex. <i>Lishizhen Med Mater Med Res</i> 27, 1313-1316(2016).                                                                   |
| 316 | MH(Shegan Mahuang)           | IL10                 | +1 | Shegan Mahuang Decoction has certain antagonism on airway inflammation in asthmatic mice.                                                                                                                            | Sui Bowen, Li Minghu, Zhai Pingping et al. Effect of Shegan Mahuang Decoction on Asthma Mouse Model of Airway                                                                                                                  |



|     |               |       |    |                                                                                                                                                                                                                                                                                                                                                                                                                                                                                                                                                                                                                                                                                                                             |                                                                                                                                                                                                                                                               |
|-----|---------------|-------|----|-----------------------------------------------------------------------------------------------------------------------------------------------------------------------------------------------------------------------------------------------------------------------------------------------------------------------------------------------------------------------------------------------------------------------------------------------------------------------------------------------------------------------------------------------------------------------------------------------------------------------------------------------------------------------------------------------------------------------------|---------------------------------------------------------------------------------------------------------------------------------------------------------------------------------------------------------------------------------------------------------------|
|     | Decoction)    |       |    | Its mechanism may be related to the decrease of serum IL-6 and increase IL-10 level.                                                                                                                                                                                                                                                                                                                                                                                                                                                                                                                                                                                                                                        | Inflammation and Serum IL-6and IL-10 Levels. <i>Journal of emergency in traditional chinese medicine</i> 26, 783-785+822(2017).                                                                                                                               |
| 317 | MH            | HMOX1 | /  |                                                                                                                                                                                                                                                                                                                                                                                                                                                                                                                                                                                                                                                                                                                             |                                                                                                                                                                                                                                                               |
| 318 | MH(Ephedrine) | BAX   | +1 | The expression intensity of Bax protein in the heart of ephedrine group was significantly higher than that of the control group, ephedrine can promote apoptosis of cardiomyocytes                                                                                                                                                                                                                                                                                                                                                                                                                                                                                                                                          | Liu Tingting. Effects of honeysuckle solution on cardiac injury induced by ephedrine in mice. <i>Journal of northwest normal university</i> (2013).                                                                                                           |
| 319 | XR(Amygdalin) | PTGS2 | -1 | The present results showed that amygdalin suppressed the prostaglandin E(2) synthesis and the nitric oxide production by inhibiting the LPS-stimulated mRNA expressions of COX-2 and iNOS in the mouse BV2 cells.                                                                                                                                                                                                                                                                                                                                                                                                                                                                                                           | Yang HY, Chang HK, Lee JW, et al. Amygdalin suppresses lipopolysaccharide-induced expressions of cyclooxygenase-2 and inducible nitric oxide synthase in mouse BV2 microglial cells. <i>Neurol Res.</i> 29, S59–S64(2007).                                    |
| 320 | XR            | iNOS  | -1 | Besides chromatographic analysis, cell culture experiments were performed using murine macrophages (RAW264.7) to study the capacity of different nut extracts (hazelnut, almond, walnut, macadamia, and pistachio) to modulate inflammatory processes. Oleic acid was the main fatty acid in hazelnut, almond, macadamia, and pistachio extracts. Both oily nut extracts and pure oleic acid significantly reduced the LPS-induced expression of iNos, Cox2, Tnf $\alpha$ , Il1 $\beta$ , and Il6 mRNAs. iNos protein expression was down-regulated followed by reduced nitric oxide formation. Thus, nut extracts at concentrations achievable in the digestive tract inhibit the expression and formation of inflammatory | Müller Anke Katharina, Schmölz Lisa, Wallert Maria, Schubert Martin, Schlörmann Wiebke, Gleil Michael, Lorkowski Stefan. In Vitro Digested Nut Oils Attenuate the Lipopolysaccharide-Induced Inflammatory Response in Macrophages. <i>Nutrients</i> 11(2019). |

mediators in macrophages.

Chlorogenic acid dose-dependently suppressed IL-1beta-induced mRNA expression of vascular cell adhesion molecule-1, intercellular cell adhesion molecule-1 and endothelial cell selectin. Chlorogenic acid also suppressed the IL-1beta-induced production of ROS. We also observed that chlorogenic acid attenuated or blocked IL-1beta-induced nuclear translocation of nuclear factor-kappaB subunits p50 and p65, which in turn attenuated CAM expression at the transcription level. Furthermore, chlorogenic acid significantly reduced the adhesion of human monocyte cells (U937) to IL-1beta-treated HUVECs in a dose-response manner. These results are similar to that of probucol.

The proinflammatory mediators monocyte chemotactic protein-1 (MCP-1) and chemokine ligand 5 (CCL-5) were determined by enzyme-linked immunosorbent assay. We found that ASP significantly promoted phosphorylation of AMP-activated protein kinase (AMPK), increased activity of adipose triglyceride lipase and hormone-sensitive lipase, and inhibited adipogenesis-related transcription factors. In addition, ASP inhibited the tumor necrosis factor- $\alpha$  (TNF- $\alpha$ )-induced cell inflammatory response via downregulation of MCP-1 and CCL-5 secretion. This

Chang WC, Chen CH, Lee MF, Chang T, Yu YM.

Chlorogenic acid attenuates adhesion molecules upregulation in IL-1 $\beta$  treated endothelial cells. *Eur J Nutr* 49, 267–275(2010).

Huang WC, Chen CY, Wu SJ. Almond Skin Polyphenol Extract Inhibits Inflammation and Promotes Lipolysis in Differentiated 3T3-L1 Adipocytes. *J Med Food* 20, 103-109(2017).

321 XR RELA(P65) -1

322 XR(Almond skin polyphenol extract) TNF $\alpha$  -1

study suggests that ASP regulates lipolysis through activation of AMPK, reduced adipogenesis, and suppresses proinflammatory cytokines in adipocytes.

Besides chromatographic analysis, cell culture experiments were performed using murine macrophages (RAW264.7) to study the capacity of different nut extracts (hazelnut, almond, walnut, macadamia, and pistachio) to modulate inflammatory processes. Oleic acid was the main fatty acid in hazelnut, almond, macadamia, and pistachio extracts. Both oily nut extracts and pure oleic acid significantly reduced the LPS-induced expression of iNos, Cox2, Tnf $\alpha$ , Il1 $\beta$ , and Il6 mRNAs. iNos protein expression was down-regulated followed by reduced nitric oxide formation. Thus, nut extracts at concentrations achievable in the digestive tract inhibit the expression and formation of inflammatory mediators in macrophages.

Exercise also significantly increased IL6, IL8, VEGF, INF $\gamma$ , TNF $\alpha$ , IL1 $\alpha$ , IL1 $\beta$ , MCP1, and EGG production rates by LPS-stimulated PBMCs, and this response was attenuated by DHA supplementation.

NS induced a significant decrease in HSV-2 replication, whereas extracts obtained from BS did not significantly influence the viral replication. High levels of cytokines

Müller Anke Katharina, Schmölz Lisa, Wallert Maria, Schubert Martin, Schlörmann Wiebke, Gleil Michael, Lorkowski Stefan. In Vitro Digested Nut Oils Attenuate the Lipopolysaccharide-Induced Inflammatory Response in Macrophages. *Nutrients* 11(2019).

Capó X, Martorell M, Sureda A, Batle JM, Tur JA, Pons A. Docosahexaenoic diet supplementation, exercise and temperature affect cytokine production by lipopolysaccharide-stimulated mononuclear cells. *J Physiol Biochem* 72, 421–434(2016).

Arena A, Bisignano C, Stassi G, Mandalari G, Wickham MS, Bisignano G. Immunomodulatory and antiviral activity of almond skins. *Immunol Lett* 132, 18-23 (2010).

323 XR(Almond skin polyphenol extract) TNF $\alpha$  -1

324 XR (Almond skin polyphenol extract) TNF $\alpha$  -1

325 XR TNF $\alpha$  -1

production, such as IFN-alpha (38+/-5.3 pg/ml), IL-12 (215+/-17.1 pg/ml), IFN-gamma (5+/-0.7 IU/ml), TNF-alpha (3940+/-201.0 pg/ml), were detected. Moreover, IL-10 (210+/-12.2 pg/ml) and IL-4 (170+/-21.4 pg/ml), representative of Th2 responses, were found.

High dose Apricot Kernel could effectively inhibit articular swelling, decrease inflammatory in tissue of AA rats and pull down the levels of TNF- $\alpha$  and sICAM-1.

Of serum inflammatory markers, IL-10 was decreased by almond intake ( $P \leq 0.05$ ), and ICAM-1, IL-1 $\beta$ , and IL-6 tended to be lower with almonds, compared to the cookies.

Besides chromatographic analysis, cell culture experiments were performed using murine macrophages (RAW264.7) to study the capacity of different nut extracts (hazelnut, almond, walnut, macadamia, and pistachio) to modulate inflammatory processes. Oleic acid was the main fatty acid in hazelnut, almond, macadamia, and pistachio extracts. Both oily nut extracts and pure oleic acid significantly reduced the LPS-induced expression of iNos, Cox2, Tnf $\alpha$ , Il1 $\beta$ , and Il6 mRNAs. iNos protein expression was down-regulated followed by reduced nitric oxide formation. Thus, nut extracts at

Zhou Xiaotao, Fulati·Rexiti, An Huawei et al. Research on antiinflammatory mechanism of Apricot Kernel in rat with adjuvantcity arthritis. *Modern Journal of Integrated Traditional Chinese and Western Medicine* 20, 4198-4199(2011).

Jung H, Chen CO, Blumberg JB, Kwak HK. The effect of almonds on vitamin E status and cardiovascular risk factors in Korean adults: a randomized clinical trial. *Eur J Nutr* 57, 2069–2079(2018).

Müller Anke Katharina, Schmölz Lisa, Wallert Maria, Schubert Martin, Schlörmann Wiebke, Glei Michael, Lorkowski Stefan. In Vitro Digested Nut Oils Attenuate the Lipopolysaccharide-Induced Inflammatory Response in Macrophages. *Nutrients* 11(2019).

326 XR TNF -1

327 XR IL6 -1

328 XR IL6 -1

concentrations achievable in the digestive tract inhibit the expression and formation of inflammatory mediators in macrophages.

Exercise also significantly increased IL6, IL8, VEGF, INF $\gamma$ , TNF $\alpha$ , IL1 $\alpha$ , IL1 $\beta$ , MCP1, and EGG production rates by LPS-stimulated PBMCs, and this response was attenuated by DHA supplementation.

The effect of amygdalin on LPS-induced RAW264.7 inflammation model in mouse peritoneal macrophages may be related to inhibiting the expression of inflammatory cytokines IL-17A, IL-23, and chemokines CCL2, CCL5, and the excessive activation of NF- $\kappa$ B and p38MAPK signal pathways.

Fermentation supernatants (FS) of raw and roasted almonds had no genotoxic effects. FS obtained from raw or mildly roasted almonds (R1) significantly increased mRNA levels of CAT (4.6-fold), SOD2 (5.6-fold) and GSTP1 (3.9-fold) but not of GPx1. FS of almonds significantly reduced the growth of LT97 cells in a time- and dose-dependent manner. Treatment with 5% almonds FS increased the number of early apoptotic cells (17.4%, on average) and caspase-3 activity (4.9-fold, on average). The results indicate a chemopreventive potential of in vitro-fermented almonds which is largely independent of the roasting

Capó X, Martorell M, Sureda A, Batle JM, Tur JA, Pons A. Docosahexaenoic diet supplementation, exercise and temperature affect cytokine production by lipopolysaccharide-stimulated mononuclear cells. *J Physiol Biochem* 72, 421–434(2016).

Zhong Xiaoqin, Li Leng, Lu Chuanjian et al. Anti-inflammation Effect of Amygdalin on Macrophage 264.7 Cells Stimulated by Lipopolysaccharide. *Tradit Chin Drug Res Pharmacol* 29, 257-263(2018).

Schlörmann W, Fischer S, Saupe C, Dinc T, Lorkowski S, Gleis M. Influence of roasting on the chemopreventive potential of in vitro fermented almonds in LT97 colon adenoma cells. *Int J Food Sci Nutr* 69, 52-63(2018).

329 XR IL6 -1

330 XR(Amygdalin) MAPK14(P38 $\alpha$ ) +1

331 XR CASP3 +1

|     |                          |                    |    |                                                                                                                                                                                                                                                                                                                                                                                                                                                                                                            |                                                                                                                                                                                                                                                                                                                                                                                                                         |
|-----|--------------------------|--------------------|----|------------------------------------------------------------------------------------------------------------------------------------------------------------------------------------------------------------------------------------------------------------------------------------------------------------------------------------------------------------------------------------------------------------------------------------------------------------------------------------------------------------|-------------------------------------------------------------------------------------------------------------------------------------------------------------------------------------------------------------------------------------------------------------------------------------------------------------------------------------------------------------------------------------------------------------------------|
| 332 | XR(Amygdalin)            | CASP3              | -1 | <p>process.</p> <p>Amygdalin without zinc showed a strong anti-HepG2 activity. Furthermore, HepG2 cell lines treatment with amygdalin + 20<math>\mu</math>mol zinc and amygdalin + 800<math>\mu</math>mol zinc showed a highly significant apoptotic effect than the effect of amygdalin without zinc. Amygdalin treatment induced the cell cycle arrest at G2/M and increased the levels of P53, Bax, cytochrome c, and caspase-3 significantly, while it decreased the level of anti-apoptotic Bcl2.</p> | El-Desouky MA, Fahmi AA, Abdelkader IY, Nasraddin KM. Anticancer effect of Amygdalin (vitamin B17) on hepatocellular carcinoma cell line(HepG2) in the presence and absence of Zinc . Anticancer Agents Med Chem 2020.                                                                                                                                                                                                  |
| 333 | XR                       | PTGS1(COX1)        | /  |                                                                                                                                                                                                                                                                                                                                                                                                                                                                                                            |                                                                                                                                                                                                                                                                                                                                                                                                                         |
| 334 | XR                       | ICAM1              | -1 | <p>Of serum inflammatory markers, IL-10 was decreased by almond intake (<math>P \leq 0.05</math>), and ICAM-1, IL-1<math>\beta</math>, and IL-6 tended to be lower with almonds, compared to the cookies.</p> <p>NS powder also reduced NF-<math>\kappa</math>B and p-JNK activation, the pro-inflammatory cytokines release, the appearance of i-NOS, nitrotyrosine and PARP in the colon and reduced the up-regulation of ICAM-1 and the expression of P-selectin.</p>                                   | <p>Jung H, Chen CO, Blumberg JB, Kwak HK. The effect of almonds on vitamin E status and cardiovascular risk factors in Korean adults: a randomized clinical trial. Eur J Nutr 57, 2069–2079(2018).</p> <p>Mandalari G, Bisignano C, Genovese T, et al. Natural almond skin reduced oxidative stress and inflammation in an experimental model of inflammatory bowel disease. Int Immunopharmacol 11, 915-924(2011).</p> |
| 335 | XR (Natural almond skin) | ICAM1              | -1 |                                                                                                                                                                                                                                                                                                                                                                                                                                                                                                            |                                                                                                                                                                                                                                                                                                                                                                                                                         |
| 336 | XR                       | IL1B(IL1 $\beta$ ) | -1 | <p>Of serum inflammatory markers, IL-10 was decreased by almond intake (<math>P \leq 0.05</math>), and ICAM-1, IL-1<math>\beta</math>, and IL-6 tended to be lower with almonds, compared to the cookies.</p>                                                                                                                                                                                                                                                                                              | <p>Jung H, Chen CO, Blumberg JB, Kwak HK. The effect of almonds on vitamin E status and cardiovascular risk factors in Korean adults: a randomized clinical trial. Eur J Nutr 57, 2069–2079(2018).</p>                                                                                                                                                                                                                  |
| 337 | XR                       | IL1B(IL1           | -1 | Besides chromatographic analysis, cell culture                                                                                                                                                                                                                                                                                                                                                                                                                                                             | Müller Anke Katharina, Schmölz Lisa, Wallert Maria, Schubert                                                                                                                                                                                                                                                                                                                                                            |

β)

experiments were performed using murine macrophages (RAW264.7) to study the capacity of different nut extracts (hazelnut, almond, walnut, macadamia, and pistachio) to modulate inflammatory processes. Oleic acid was the main fatty acid in hazelnut, almond, macadamia, and pistachio extracts. Both oily nut extracts and pure oleic acid significantly reduced the LPS-induced expression of iNos, Cox2, Tnf $\alpha$ , Il1 $\beta$ , and Il6 mRNAs. iNos protein expression was down-regulated followed by reduced nitric oxide formation. Thus, nut extracts at concentrations achievable in the digestive tract inhibit the expression and formation of inflammatory mediators in macrophages.

Chlorogenic acid dose-dependently suppressed IL-1beta-induced mRNA expression of vascular cell adhesion molecule-1, intercellular cell adhesion molecule-1 and endothelial cell selectin. Chlorogenic acid also suppressed the IL-1beta-induced production of ROS. We also observed that chlorogenic acid attenuated or blocked IL-1beta-induced nuclear translocation of nuclear factor-kappaB subunits p50 and p65, which in turn attenuated CAM expression at the transcription level. Furthermore, chlorogenic acid significantly reduced the adhesion of human monocyte cells (U937) to IL-1beta-treated HUVECs in a

Martin, Schlörmann Wiebke, Gleis Michael, Lorkowski Stefan. In Vitro Digested Nut Oils Attenuate the Lipopolysaccharide-Induced Inflammatory Response in Macrophages. *Nutrients* 11(2019).

Chang WC, Chen CH, Lee MF, Chang T, Yu YM. Chlorogenic acid attenuates adhesion molecules upregulation in IL-1 $\beta$  treated endothelial cells. *Eur J Nutr* 49, 267–275(2010).

|     |               |                |    |                                                                                                                                                                                                                                                                                                                                                                                                                                                                                                                                                                                                                                                                                                                                                                                                                                                                                                                                                                                                                                                                                                                                                                                                                                                                                                                                                |                                                                                                                                                                                                                                                           |
|-----|---------------|----------------|----|------------------------------------------------------------------------------------------------------------------------------------------------------------------------------------------------------------------------------------------------------------------------------------------------------------------------------------------------------------------------------------------------------------------------------------------------------------------------------------------------------------------------------------------------------------------------------------------------------------------------------------------------------------------------------------------------------------------------------------------------------------------------------------------------------------------------------------------------------------------------------------------------------------------------------------------------------------------------------------------------------------------------------------------------------------------------------------------------------------------------------------------------------------------------------------------------------------------------------------------------------------------------------------------------------------------------------------------------|-----------------------------------------------------------------------------------------------------------------------------------------------------------------------------------------------------------------------------------------------------------|
| 339 | XR            | IL1B(IL1<br>β) | -1 | <p>dose-response manner. These results are similar to that of probucol.</p> <p>Exercise also significantly increased IL6, IL8, VEGF, INF<math>\gamma</math>, TNF<math>\alpha</math>, IL1<math>\alpha</math>, IL1<math>\beta</math>, MCP1, and EGG production rates by LPS-stimulated PBMCs, and this response was attenuated by DHA supplementation.</p> <p>Amygdalin without zinc showed a strong anti-HepG2 activity. Furthermore, HepG2 cell lines treatment with amygdalin + 20<math>\mu</math>mol zinc and amygdalin + 800<math>\mu</math>mol zinc showed a highly significant apoptotic effect than the effect of amygdalin without zinc. Amygdalin treatment induced the cell cycle arrest at G2/M and increased the levels of P53, Bax, cytochrome c, and caspase-3 significantly, while it decreased the level of anti-apoptotic Bcl2.</p> <p>Amygdalin without zinc showed a strong anti-HepG2 activity. Furthermore, HepG2 cell lines treatment with amygdalin + 20<math>\mu</math>mol zinc and amygdalin + 800<math>\mu</math>mol zinc showed a highly significant apoptotic effect than the effect of amygdalin without zinc. Amygdalin treatment induced the cell cycle arrest at G2/M and increased the levels of P53, Bax, cytochrome c, and caspase-3 significantly, while it decreased the level of anti-apoptotic Bcl2.</p> | <p>Capó X, Martorell M, Sureda A, Batle JM, Tur JA, Pons A. Docosahexaenoic diet supplementation, exercise and temperature affect cytokine production by lipopolysaccharide-stimulated mononuclear cells. <i>J Physiol Biochem</i> 72, 421–434(2016).</p> |
| 340 | XR(Amygdalin) | TP53<br>(P53)  | +1 | <p>Amygdalin without zinc showed a strong anti-HepG2 activity. Furthermore, HepG2 cell lines treatment with amygdalin + 20<math>\mu</math>mol zinc and amygdalin + 800<math>\mu</math>mol zinc showed a highly significant apoptotic effect than the effect of amygdalin without zinc. Amygdalin treatment induced the cell cycle arrest at G2/M and increased the levels of P53, Bax, cytochrome c, and caspase-3 significantly, while it decreased the level of anti-apoptotic Bcl2.</p> <p>Amygdalin without zinc showed a strong anti-HepG2 activity. Furthermore, HepG2 cell lines treatment with amygdalin + 20<math>\mu</math>mol zinc and amygdalin + 800<math>\mu</math>mol zinc showed a highly significant apoptotic effect than the effect of amygdalin without zinc. Amygdalin treatment induced the cell cycle arrest at G2/M and increased the levels of P53, Bax, cytochrome c, and caspase-3 significantly, while it decreased the level of anti-apoptotic Bcl2.</p>                                                                                                                                                                                                                                                                                                                                                          | <p>El-Desouky Mohamed A, Fahmi Abdelgawad A, Abdelkader Ibrahim Y et al. Anticancer effect of Amygdalin (vitamin B17) on hepatocellular carcinoma cell line(HepG2) in the presence and absence of Zinc. <i>Anticancer Agents Med Chem</i> (2020).</p>     |
| 341 | XR(Amygdalin) | BCL2           | -1 | <p>Amygdalin without zinc showed a strong anti-HepG2 activity. Furthermore, HepG2 cell lines treatment with amygdalin + 20<math>\mu</math>mol zinc and amygdalin + 800<math>\mu</math>mol zinc showed a highly significant apoptotic effect than the effect of amygdalin without zinc. Amygdalin treatment induced the cell cycle arrest at G2/M and increased the levels of P53, Bax, cytochrome c, and caspase-3 significantly, while it decreased the level of anti-apoptotic Bcl2.</p> <p>Amygdalin without zinc showed a strong anti-HepG2 activity. Furthermore, HepG2 cell lines treatment with amygdalin + 20<math>\mu</math>mol zinc and amygdalin + 800<math>\mu</math>mol zinc showed a highly significant apoptotic effect than the effect of amygdalin without zinc. Amygdalin treatment induced the cell cycle arrest at G2/M and increased the levels of P53, Bax, cytochrome c, and caspase-3 significantly, while it decreased the level of anti-apoptotic Bcl2.</p>                                                                                                                                                                                                                                                                                                                                                          | <p>El-Desouky MA, Fahmi AA, Abdelkader IY, Nasraddin KM. Anticancer effect of Amygdalin (vitamin B17) on hepatocellular carcinoma cell line(HepG2) in the presence and absence of Zinc . <i>Anticancer Agents Med Chem</i> 2020.</p>                      |
| 342 | XR(Amygdalin) | TGFB1(T        | -1 | <p>Amygdalin group had a significant inhibitory effect on</p>                                                                                                                                                                                                                                                                                                                                                                                                                                                                                                                                                                                                                                                                                                                                                                                                                                                                                                                                                                                                                                                                                                                                                                                                                                                                                  | <p>Luo Huanhuan. Effect of amygdalin on activation and proliferation</p>                                                                                                                                                                                  |



|     |                  | GFβ1)          |    | TGF-βm RNA and CTGFm RNA                                                                                                                                                                                                                                                                                                                                                                                                                   | of HSC and its related cytokine network.Traditional Chinese Medicine University Of Guangzhou (2010).                                                                  |
|-----|------------------|----------------|----|--------------------------------------------------------------------------------------------------------------------------------------------------------------------------------------------------------------------------------------------------------------------------------------------------------------------------------------------------------------------------------------------------------------------------------------------|-----------------------------------------------------------------------------------------------------------------------------------------------------------------------|
| 343 | XR               | MAPK1          | /  |                                                                                                                                                                                                                                                                                                                                                                                                                                            |                                                                                                                                                                       |
| 344 | XR               | CXCL8<br>(IL8) | /  |                                                                                                                                                                                                                                                                                                                                                                                                                                            |                                                                                                                                                                       |
| 345 | XR               | CRP            | /  |                                                                                                                                                                                                                                                                                                                                                                                                                                            |                                                                                                                                                                       |
| 346 | XR               | CCL2           | /  |                                                                                                                                                                                                                                                                                                                                                                                                                                            |                                                                                                                                                                       |
| 347 | XR               | MAPK8          | /  |                                                                                                                                                                                                                                                                                                                                                                                                                                            |                                                                                                                                                                       |
| 348 | XR               | FOS(C-F<br>OS) | /  |                                                                                                                                                                                                                                                                                                                                                                                                                                            |                                                                                                                                                                       |
| 349 | XR(Amygdalin)    | IL4            | -1 | Infiltration of inflammatory cells such as eosinophilic cells, lymphocytes and macrophages in the tracheal submucosa of each dose of bitter almond group showed a decreasing trend, and significantly reduced the content of IL-4 in alveolar lavage fluid.                                                                                                                                                                                | Wei Hao, Xu Dong, Yao Dongfeng et al. Effects of amygdalin on airway inflammation in mice with allergic asthma. <i>Shanxi J Tradit Chin Med</i> 37, 1691-1693(2016).  |
| 350 | XR(Almond skins) | IL4            | +1 | NS induced a significant decrease in HSV-2 replication, whereas extracts obtained from BS did not significantly influence the viral replication. High levels of cytokines production, such as IFN-alpha (38+/-5.3 pg/ml), IL-12 (215+/-17.1 pg/ml), IFN-gamma (5+/-0.7 IU/ml), TNF-alpha (3940+/-201.0 pg/ml), were detected. Moreover, IL-10 (210+/-12.2 pg/ml) and IL-4 (170+/-21.4 pg/ml), representative of Th2 responses, were found. | Arena A, Bisignano C, Stassi G, Mandalari G, Wickham MS, Bisignano G. Immunomodulatory and antiviral activity of almond skins. <i>Immunol Lett</i> 132, 18-23 (2010). |
| 351 | XR(Almond skins) | IL4            | -1 | We have investigated the effect of almond skin extracts on the production of pro-inflammatory and                                                                                                                                                                                                                                                                                                                                          | Arena A, Bisignano C, Stassi G, Filocamo A, Mandalari G. Almond Skin Inhibits HSV-2 Replication in Peripheral Blood                                                   |

anti-inflammatory cytokines in human peripheral blood mononuclear cells (PBMCs). PBMCs were either infected or not by herpes simplex virus type 2 (HSV-2), with and without prior treatment with almond skin extracts. Production of IL-17 induced by HSV-2 was inhibited by natural skins (NS) treatment. NS triggered PBMC in releasing IFN- $\alpha$ , IFN- $\gamma$  and IL-4 in cellular supernatants. These results may explain the antiviral potential of almond skins./NS treatment was able to inhibit IL-17 production up-regulating IFN- $\alpha$  and IL-4. Therefore, NS could play a key role for the antiviral activity of almond skins since it is a good inducer of IFN- $\alpha$ .

Mononuclear Cells by Modulating the Cytokine Network. *Molecules* 20, 8816–8822 (2015).

Exercise also significantly increased IL6, IL8, VEGF, INF $\gamma$ , TNF $\alpha$ , IL1 $\alpha$ , IL1 $\beta$ , MCP1, and EGG production rates by LPS-stimulated PBMCs, and this response was attenuated by DHA supplementation.

Capó X, Martorell M, Sureda A, Batle JM, Tur JA, Pons A. Docosahexaenoic diet supplementation, exercise and temperature affect cytokine production by lipopolysaccharide-stimulated mononuclear cells. *J Physiol Biochem* 72, 421–434(2016).

After the almond intervention, serum alpha-tocopherol, SOD, and GPX increased significantly in smokers by 10, 35, and 16%, respectively and 8-OHdG, MDA, and DNA strand breaks decreased significantly by 28, 34, and 23%.

Li N, Jia X, Chen CY, et al. Almond consumption reduces oxidative DNA damage and lipid peroxidation in male smokers. *J Nutr* 137, 2717–2722(2007).

|     |    |                         |    |
|-----|----|-------------------------|----|
| 352 | XR | IL1A(IL-1<br>$\alpha$ ) | -1 |
| 353 | XR | STAT1                   | /  |
| 354 | XR | EGFR                    | /  |
| 355 | XR | CXCL10                  | /  |

|     |    |      |    |
|-----|----|------|----|
| 356 | XR | SOD1 | +1 |
|-----|----|------|----|

In smokers, after almond supplementation, the concentration of 8-OHdG remained significantly greater than in nonsmokers by 98%. These results suggest almond intake can enhance antioxidant defenses and diminish biomarkers of oxidative stress in smokers.

Western blot results showed that the expressions of caspase-3 and PARP proteins were down-regulated after the treatment of 0.1, 0.25 and 0.5 mL/L bitter almond essential oil(BAEO) on HaCaT cells for 24 h

Yang Wenhua, Zhou Rui, Li Keyou. Effects of bitter almond essential oil on proliferation and apoptosis of HaCaT cells. *Progress in Veterinary Medicine* 84-89(2015).

We have investigated the effect of almond skin extracts on the production of pro-inflammatory and anti-inflammatory cytokines in human peripheral blood mononuclear cells (PBMCs). PBMCs were either infected or not by herpes simplex virus type 2 (HSV-2), with and without prior treatment with almond skin extracts. Production of IL-17 induced by HSV-2 was inhibited by natural skins (NS) treatment. NS triggered PBMC in releasing IFN- $\alpha$ , IFN- $\gamma$  and IL-4 in cellular supernatants. These results may explain the antiviral potential of almond skins. NS treatment was able to inhibit IL-17 production up-regulating IFN- $\alpha$  and IL-4. Therefore, NS could play a key role for the antiviral activity of almond skins since it is a good inducer of IFN- $\alpha$ .

Arena A, Bisignano C, Stassi G, Filocamo A, Mandalari G. Almond Skin Inhibits HSV-2 Replication in Peripheral Blood Mononuclear Cells by Modulating the Cytokine Network. *Molecules* 20, 8816–8822 (2015).

357 XR(Bitter almond essential oil) PARP1 -1

358 XR CASP8 /

359 XR(Almond skin ) IFNG(IFN- $\gamma$ ) -1

|     |                  |                      |    |                                                                                                                                                                                                                                                                                                                                                                                                                                                                                                                                                                              |                                                                                                                                                                                                                                                    |
|-----|------------------|----------------------|----|------------------------------------------------------------------------------------------------------------------------------------------------------------------------------------------------------------------------------------------------------------------------------------------------------------------------------------------------------------------------------------------------------------------------------------------------------------------------------------------------------------------------------------------------------------------------------|----------------------------------------------------------------------------------------------------------------------------------------------------------------------------------------------------------------------------------------------------|
| 360 | XR(Almond skin ) | IFNG(IFN- $\gamma$ ) | +1 | NS induced a significant decrease in HSV-2 replication, whereas extracts obtained from BS did not significantly influence the viral replication. High levels of cytokines production, such as IFN-alpha (38+/-5.3 pg/ml), IL-12 (215+/-17.1 pg/ml), IFN-gamma (5+/-0.7 IU/ml), TNF-alpha (3940+/-201.0 pg/ml), were detected. Moreover, IL-10 (210+/-12.2 pg/ml) and IL-4 (170+/-21.4 pg/ml), representative of Th2 responses, were found.                                                                                                                                   | Arena A, Bisignano C, Stassi G, Mandalari G, Wickham MS, Bisignano G. Immunomodulatory and antiviral activity of almond skins. <i>Immunol Lett</i> 132, 18-23 (2010).                                                                              |
| 361 | XR(Almond skin ) | IFNG(IFN- $\gamma$ ) | -1 | Exercise also significantly increased IL6, IL8, VEGF, INF $\gamma$ , TNF $\alpha$ , IL1 $\alpha$ , IL1 $\beta$ , MCP1, and EGG production rates by LPS-stimulated PBMCs, and this response was attenuated by DHA supplementation.                                                                                                                                                                                                                                                                                                                                            | Capó X, Martorell M, Sureda A, Batle JM, Tur JA, Pons A. Docosahexaenoic diet supplementation, exercise and temperature affect cytokine production by lipopolysaccharide-stimulated mononuclear cells. <i>J Physiol Biochem</i> 72, 421-434(2016). |
| 362 | XR               | IL2                  | /  | Fermentation supernatants (FS) of raw and roasted almonds had no genotoxic effects. FS obtained from raw or mildly roasted almonds (R1) significantly increased mRNA levels of CAT (4.6-fold), SOD2 (5.6-fold) and GSTP1 (3.9-fold) but not of GPx1. FS of almonds significantly reduced the growth of LT97 cells in a time- and dose-dependent manner. Treatment with 5% almonds FS increased the number of early apoptotic cells (17.4%, on average) and caspase-3 activity (4.9-fold, on average). The results indicate a chemopreventive potential of in vitro-fermented | Schlörmann W, Fischer S, Saupe C, Dinc T, Lorkowski S, Gleis M. Influence of roasting on the chemopreventive potential of in vitro fermented almonds in LT97 colon adenoma cells. <i>Int J Food Sci Nutr</i> 69, 52-63(2018).                      |
| 363 | XR               | CAT                  | +1 |                                                                                                                                                                                                                                                                                                                                                                                                                                                                                                                                                                              |                                                                                                                                                                                                                                                    |

|     |               |       |         |                                                                                                                                                                                                                                                                                                                                                                                                                                                                   |                                                                                                                                                                                                                               |
|-----|---------------|-------|---------|-------------------------------------------------------------------------------------------------------------------------------------------------------------------------------------------------------------------------------------------------------------------------------------------------------------------------------------------------------------------------------------------------------------------------------------------------------------------|-------------------------------------------------------------------------------------------------------------------------------------------------------------------------------------------------------------------------------|
|     |               |       |         | almonds which is largely independent of the roasting process.                                                                                                                                                                                                                                                                                                                                                                                                     |                                                                                                                                                                                                                               |
|     |               |       |         | NS induced a significant decrease in HSV-2 replication, whereas extracts obtained from BS did not significantly influence the viral replication. High levels of cytokines production, such as IFN-alpha (38+/-5.3 pg/ml), IL-12 (215+/-17.1 pg/ml), IFN-gamma (5+/-0.7 IU/ml), TNF-alpha (3940+/-201.0 pg/ml), were detected. Moreover, IL-10 (210+/-12.2 pg/ml) and IL-4 (170+/-21.4 pg/ml), representative of Th2 responses, were found.                        |                                                                                                                                                                                                                               |
| 364 | XR            | IL10  | +1      |                                                                                                                                                                                                                                                                                                                                                                                                                                                                   | Arena A, Bisignano C, Stassi G, Mandalari G, Wickham MS, Bisignano G. Immunomodulatory and antiviral activity of almond skins. <i>Immunol Lett</i> 132, 18-23 (2010).                                                         |
| 365 | XR            | IL10  | -1      | Of serum inflammatory markers, IL-10 was decreased by almond intake ( $P \leq 0.05$ ), and ICAM-1, IL-1 $\beta$ , and IL-6 tended to be lower with almonds, compared to the cookies.                                                                                                                                                                                                                                                                              | Jung H, Chen CO, Blumberg JB, Kwak HK. The effect of almonds on vitamin E status and cardiovascular risk factors in Korean adults: a randomized clinical trial. <i>Eur J Nutr</i> 57, 2069–2079(2018).                        |
| 366 | XR            | HMOX1 | /       |                                                                                                                                                                                                                                                                                                                                                                                                                                                                   |                                                                                                                                                                                                                               |
| 367 | XR(Amygdalin) | BAX   | -1      | Amygdalin without zinc showed a strong anti-HepG2 activity. Furthermore, HepG2 cell lines treatment with amygdalin + 20 $\mu$ mol zinc and amygdalin + 800 $\mu$ mol zinc showed a highly significant apoptotic effect than the effect of amygdalin without zinc. Amygdalin treatment induced the cell cycle arrest at G2/M and increased the levels of P53, Bax, cytochrome c, and caspase-3 significantly, while it decreased the level of anti-apoptotic Bcl2. | El-Desouky MA, Fahmi AA, Abdelkader IY, Nasraddin KM. Anticancer effect of Amygdalin (vitamin B17) on hepatocellular carcinoma cell line(HepG2) in the presence and absence of Zinc . <i>Anticancer Agents Med Chem</i> 2020. |
| 368 | HX            | PTGS2 | $\pm$ 1 | In the lps-induced model of RAW264.7 cell                                                                                                                                                                                                                                                                                                                                                                                                                         | Liu Yuhong. Study on the anti - gastric ulcer and ulcerative colitis by                                                                                                                                                       |

|     |                      |       |    |                                                                                                                                                                                                                                                                                                                                                                                                                                                                                                                                                                                                                                                                                                                                                                                                                                                                                                                                                                                                                                                                                                                                                                                                                                                                                                                                                                                                                                                     |                                                                                                                                                                                                                                                                                                               |
|-----|----------------------|-------|----|-----------------------------------------------------------------------------------------------------------------------------------------------------------------------------------------------------------------------------------------------------------------------------------------------------------------------------------------------------------------------------------------------------------------------------------------------------------------------------------------------------------------------------------------------------------------------------------------------------------------------------------------------------------------------------------------------------------------------------------------------------------------------------------------------------------------------------------------------------------------------------------------------------------------------------------------------------------------------------------------------------------------------------------------------------------------------------------------------------------------------------------------------------------------------------------------------------------------------------------------------------------------------------------------------------------------------------------------------------------------------------------------------------------------------------------------------------|---------------------------------------------------------------------------------------------------------------------------------------------------------------------------------------------------------------------------------------------------------------------------------------------------------------|
| 369 | HX(Patchouli ketone) | PTGS2 | -1 | <p>inflammation in vitro, 10, 20 and 40 mol/L of patchouli intervention reduced the level of PGE2 NO TNF-<math>\alpha</math> and increased the level of IL-10, down-regulated the mRNA expression of COX-2 iNOS TNF-<math>\alpha</math> and up-regulated the mRNA expression of IL-6 IL-1, thus slowing down the inflammatory response. It inhibited the excessive production of inflammatory mediators (TNF-<math>\alpha</math>, IL-1<math>\beta</math>, IL-6, IFN-<math>\gamma</math>, IL-12, PGE2, NO) in the serum of endotoxin shock mice, and down-regulated the expression of mediators related to inflammation (TNF-, IL-6, IL-12, COX-2, and iNOS) in the liver and lung tissues of endotoxin shock mice.</p> <p>Epoxopatchouli significantly reduced the levels of proinflammatory cytokines such as TNF-<math>\alpha</math>, IL-1<math>\beta</math> and IL-6 in the foot tissue, but also increased the levels of anti-inflammatory cytokines such as IL-4 and IL-10. Epoxide patchouli significantly down-regulated the expression of COX-2 and iNOS signaling pathways. Epoxopatchouli significantly reduced the levels of proinflammatory cytokines such as TNF-<math>\alpha</math>, IL-1<math>\beta</math> and IL-6 in the foot tissue, but also increased the levels of anti-inflammatory cytokines such as IL-4 and IL-10. Epoxide patchouli significantly down-regulated the expression of COX-2 and iNOS signaling pathways.</p> | <p>- patchouli alcohol metabolite in gastric juice. Traditional Chinese Medicine University Of Guangzhou (2018).</p> <p>Li Yucui. Anti-inflammatory and antifungal activities and drug metabolism of Patchouli ketone and epimedium alcohol. Traditional Chinese Medicine University Of Guangzhou (2013).</p> |
| 370 | HX(Epoxy patchouli ) | PTGS2 | -1 | <p>Epoxopatchouli significantly reduced the levels of proinflammatory cytokines such as TNF-<math>\alpha</math>, IL-1<math>\beta</math> and IL-6 in the foot tissue, but also increased the levels of anti-inflammatory cytokines such as IL-4 and IL-10. Epoxide patchouli significantly down-regulated the expression of COX-2 and iNOS signaling pathways. Epoxopatchouli significantly reduced the levels of proinflammatory cytokines such as TNF-<math>\alpha</math>, IL-1<math>\beta</math> and IL-6 in the foot tissue, but also increased the levels of anti-inflammatory cytokines such as IL-4 and IL-10. Epoxide patchouli significantly down-regulated the expression of COX-2 and iNOS signaling pathways.</p>                                                                                                                                                                                                                                                                                                                                                                                                                                                                                                                                                                                                                                                                                                                        | <p>Liang Jiali. Effect and mechanism of Epoxy patchouli on anti-inflammation and anti-gastric ulcer. Traditional Chinese Medicine University Of Guangzhou (2018).</p>                                                                                                                                         |
| 371 | HX(Epoxy patchouli ) | iNOS  | -1 | <p>Epoxopatchouli significantly reduced the levels of proinflammatory cytokines such as TNF-<math>\alpha</math>, IL-1<math>\beta</math> and IL-6 in the foot tissue, but also increased the levels of anti-inflammatory cytokines such as IL-4 and IL-10. Epoxide patchouli significantly down-regulated the expression of COX-2 and iNOS signaling pathways.</p>                                                                                                                                                                                                                                                                                                                                                                                                                                                                                                                                                                                                                                                                                                                                                                                                                                                                                                                                                                                                                                                                                   | <p>Liang Jiali. Effect and mechanism of Epoxy patchouli on anti-inflammation and anti-gastric ulcer. Traditional Chinese Medicine University Of Guangzhou (2018).</p>                                                                                                                                         |
| 372 | HX(Patchouli         | iNOS  | -1 | <p>In the lps-induced model of RAW264.7 cell</p>                                                                                                                                                                                                                                                                                                                                                                                                                                                                                                                                                                                                                                                                                                                                                                                                                                                                                                                                                                                                                                                                                                                                                                                                                                                                                                                                                                                                    | <p>Liu Yuhong. Study on the anti - gastric ulcer and ulcerative colitis by</p>                                                                                                                                                                                                                                |

|     |                       |           |    |                                                                                                                                                                                                                                                                                                                                                                                                                                                                                                                                                                                                                                                                  |                                                                                                                                                                                                                                                                |
|-----|-----------------------|-----------|----|------------------------------------------------------------------------------------------------------------------------------------------------------------------------------------------------------------------------------------------------------------------------------------------------------------------------------------------------------------------------------------------------------------------------------------------------------------------------------------------------------------------------------------------------------------------------------------------------------------------------------------------------------------------|----------------------------------------------------------------------------------------------------------------------------------------------------------------------------------------------------------------------------------------------------------------|
|     | alcohol)              |           |    | inflammation in vitro, 10, 20 and 40 mol/L of patchouli intervention reduced the level of PGE2 NO TNF- $\alpha$ and increased the level of IL-10, down-regulated the mRNA expression of COX-2 iNOS TNF- $\alpha$ and up-regulated the mRNA expression of IL-6 IL-1, thus slowing down the inflammatory response. It inhibited the excessive production of inflammatory mediators (TNF- $\alpha$ , IL-1 $\beta$ , IL-6, IFN- $\gamma$ , IL-12, PGE2, NO) in the serum of endotoxin shock mice, and down-regulated the expression of mediators related to inflammation (TNF-, IL-6, IL-12, COX-2, and iNOS) in the liver and lung tissues of endotoxin shock mice. | - patchouli alcohol metabolite in gastric juice. Traditional Chinese Medicine University Of Guangzhou (2018).                                                                                                                                                  |
| 373 | HX(Patchouli ketone)  | iNOS      | -1 | The contents of SOD GSH and CAT were increased and the content of MDA was decreased to inhibit oxidative stress.Reduced TNF- $\alpha$ IL-1 $\beta$ and IL-6 levels and down-regulated phosphorylation of p65 and I $\kappa$ B proteins to inhibit the NF- $\kappa$ B signaling pathway and reduce inflammation                                                                                                                                                                                                                                                                                                                                                   | Li Yucui. Anti-inflammatory and antifungal activities and drug metabolism of Patchouli ketone and epimedium alcohol. Traditional Chinese Medicine University Of Guangzhou (2013).                                                                              |
| 374 | HX(Patchouli alcohol) | RELA(P65) | -1 | Patchouli ketone can significantly reduce the loss of hearing in the secretory otitis media model of guinea pigs, the thickness of mucous membrane and neutrophil infiltration, and the effect may be related to the inhibition of TNF- $\alpha$ and ICAM-1 expression in the ear mucous membrane.                                                                                                                                                                                                                                                                                                                                                               | Liu Yuhong.Study on the anti - gastric ulcer and ulcerative colitis by - patchouli alcohol metabolite in gastric juice. Traditional Chinese Medicine University Of Guangzhou (2018).                                                                           |
| 375 | HX(Patchouli ketone)  | TNF       | -1 |                                                                                                                                                                                                                                                                                                                                                                                                                                                                                                                                                                                                                                                                  | Zeng Xiangyue, Sun Haiyan, Li Yangyang et al. Effect of Patchouli ketone on Expressions of TNF — $\alpha$ and ICAM — 1 in Ear Mucous Membrane of Guinea Pigs with Secretory Otitis Media.Chinese archives of traditional Chinese medicine 37, 1629-1633(2019). |
| 376 | HX(Patchouli          | IL6       | -1 | In the lps-induced model of RAW264.7 cell                                                                                                                                                                                                                                                                                                                                                                                                                                                                                                                                                                                                                        | Liu Yuhong.Study on the anti - gastric ulcer and ulcerative colitis by                                                                                                                                                                                         |

|     |                      |                        |    |                                                                                                                                                                                                                                                                                                                                                                                                                                                                                                                                                         |                                                                                                                                                                                   |
|-----|----------------------|------------------------|----|---------------------------------------------------------------------------------------------------------------------------------------------------------------------------------------------------------------------------------------------------------------------------------------------------------------------------------------------------------------------------------------------------------------------------------------------------------------------------------------------------------------------------------------------------------|-----------------------------------------------------------------------------------------------------------------------------------------------------------------------------------|
|     | alcohol)             |                        |    | inflammation in vitro, 10, 20 and 40 mol/L of patchouli intervention reduced the level of PGE2 NO TNF- $\alpha$ and increased the level of IL-10, down-regulated the mRNA expression of COX-2 iNOS TNF- $\alpha$ and up-regulated the mRNA expression of IL-6 IL-1, thus slowing down the inflammatory response. Serum levels of TNF- $\alpha$ IL-6 IL-1 $\beta$ and MDA were decreased in dexamethasone group and patchoulone group                                                                                                                    | - patchouli alcohol metabolite in gastric juice. Traditional Chinese Medicine University Of Guangzhou (2018).                                                                     |
| 377 | HX(Patchouli ketone) | IL6                    | -1 | It inhibited the excessive production of inflammatory mediators (TNF- $\alpha$ , IL-1 $\beta$ , IL-6, IFN- $\gamma$ , IL-12, PGE2, NO) in the serum of endotoxin shock mice, and down-regulated the expression of mediators related to inflammation (TNF-, IL-6, IL-12, COX-2, and iNOS) in the liver and lung tissues of endotoxin shock mice.                                                                                                                                                                                                         | Zhang Weina, Zhang Mingming, Yu Min. Study on protective mechanism of Patchouli ketone on lung injury in COPD mice. Health Studies 39, 428-431(2019).                             |
| 378 | HX(Patchouli ketone) | IL6                    | -1 | Epoxopatchouli significantly reduced the levels of proinflammatory cytokines such as TNF- $\alpha$ , IL-1 $\beta$ and IL-6 in the foot tissue, but also increased the levels of anti-inflammatory cytokines such as IL-4 and IL-10. Epoxide patchouli significantly down-regulated the expression of COX-2 and iNOS signaling pathways. Patchouli ketone can suppress the macrophages induced by LPS in the NF- $\kappa$ B JNK/SAPK and activation of p38MAPK signal transduction pathways, prompt Patchouli ketone of LPS in mice induced by endotoxin | Li Yucui. Anti-inflammatory and antifungal activities and drug metabolism of Patchouli ketone and epimedium alcohol. Traditional Chinese Medicine University Of Guangzhou (2013). |
| 379 | HX(Epoxy patchouli ) | IL6                    | -1 |                                                                                                                                                                                                                                                                                                                                                                                                                                                                                                                                                         | Liang Jiali. Effect and mechanism of Epoxy patchouli on anti - inflammation and anti - gastric ulcer. Traditional Chinese Medicine University Of Guangzhou (2018).                |
| 380 | HX(Patchouli ketone) | MAPK14 (P38 $\alpha$ ) | -1 |                                                                                                                                                                                                                                                                                                                                                                                                                                                                                                                                                         | Li Yucui. Anti-inflammatory and antifungal activities and drug metabolism of Patchouli ketone and epimedium alcohol. Traditional Chinese Medicine University Of Guangzhou (2013). |



shock protection mechanism, may be its blocking the NF- $\kappa$ B of LPS activated cells and MAPK signal transduction pathway, and regulate the expression of related genes, inflammatory mediators eventually curb excessive inflammatory mediators.

Epimedium significantly inhibited the proliferation of DU145 cells in a dose-dependent and time-dependent manner. It can enhance the expression of caspase-3 and Bax proteins in DU145 cells and reduce the expression of Livin bcl-2 proteins, so as to exert the effect of acarbazanol on inducing apoptosis and inhibiting proliferation of DU145 cells

After gavage of -patchouli at different doses, the protein expressions of COX-1, COX-2 and PGE2 were increased, and the expressions of VEGF and flt-1 were promoted.

Patchouli ketone can significantly reduce the loss of hearing in the secretory otitis media model of guinea pigs, the thickness of mucous membrane and neutrophil infiltration, and the effect may be related to the inhibition of TNF- $\alpha$  and ICAM-1 expression in the ear mucous membrane.

The contents of SOD GSH and CAT were increased and the content of MDA was decreased to inhibit oxidative stress. Reduced TNF- $\alpha$ , IL-1 $\beta$  and IL-6 levels, and down-regulated phosphorylation of p65 and I $\kappa$ B

CAI Jian, Peng Cheng, Zhu Xiaoyan, et al. Inhibition of the growth of human androgen independent prostate cancer cells DU145 and its mechanism. Chinese journal of experimental formulae 165-169(2014).

Liu Yuhong. Study on the anti - gastric ulcer and ulcerative colitis by - patchouli alcohol metabolite in gastric juice. Traditional Chinese Medicine University Of Guangzhou (2018).

Zeng Xiangyue, Sun Haiyan, Li Yangyang et al. Effect of Patchouli ketone on Expressions of TNF -  $\alpha$  and ICAM - 1 in Ear Mucous Membrane of Guinea Pigs with Secretory Otitis Media. Chinese archives of traditional Chinese medicine 37, 1629-1633(2019).

Liu Yuhong. Study on the anti - gastric ulcer and ulcerative colitis by - patchouli alcohol metabolite in gastric juice. Traditional Chinese Medicine University Of Guangzhou (2018).

381 HX CASP3 +1

382 HX(Patchouli alcohol) PTGS1(COX1) +1

383 HX(Patchouli ketone) ICAM1 -1

384 HX(Patchouli alcohol) IL1B(IL1 $\beta$ ) -1

|     |                       |                      |    |                                                                                                                                                                                                                                                                                                                                                                                                                                                                                                                            |                                                                                                                                                                                   |
|-----|-----------------------|----------------------|----|----------------------------------------------------------------------------------------------------------------------------------------------------------------------------------------------------------------------------------------------------------------------------------------------------------------------------------------------------------------------------------------------------------------------------------------------------------------------------------------------------------------------------|-----------------------------------------------------------------------------------------------------------------------------------------------------------------------------------|
| 385 | HX(Patchouli ketone)  | IL1B(IL1 $\beta$ )   | -1 | <p>proteins to inhibit the NF-<math>\kappa</math>B signaling pathway and reduce inflammation</p> <p>It inhibited the excessive production of inflammatory mediators (TNF-<math>\alpha</math>, IL-1<math>\beta</math>, IL-6, IFN-<math>\gamma</math>, IL-12, PGE2, NO) in the serum of endotoxin shock mice, and down-regulated the expression of mediators related to inflammation (TNF-, IL-6, IL-12, COX-2, and iNOS) in the liver and lung tissues of endotoxin shock mice.</p>                                         | Li Yucui. Anti-inflammatory and antifungal activities and drug metabolism of Patchouli ketone and epimedium alcohol. Traditional Chinese Medicine University Of Guangzhou (2013). |
| 386 | HX(Patchouli ketone)  | IL1B(IL1 $\beta$ )   | -1 | <p>Serum levels of TNF-<math>\alpha</math>, IL-6, IL-1<math>\beta</math> and MDA were decreased in dexamethasone group and patchoulone group.</p> <p>Epoxopatchouli significantly reduced the levels of proinflammatory cytokines such as TNF-<math>\alpha</math>, IL-1<math>\beta</math> and IL-6 in the foot tissue, but also increased the levels of anti-inflammatory cytokines such as IL-4 and IL-10.</p> <p>Epoxide patchouli significantly down-regulated the expression of COX-2 and iNOS signaling pathways.</p> | Zhang Weina, Zhang Mingming, Yu Min. Study on protective mechanism of Patchouli ketone on lung injury in COPD mice. Health Studies 39, 428-431(2019).                             |
| 387 | HX(Epoxy patchouli )  | IL1B(IL1 $\beta$ )   | -1 | <p>Epoxide patchouli significantly down-regulated the expression of COX-2 and iNOS signaling pathways.</p>                                                                                                                                                                                                                                                                                                                                                                                                                 | Liang Jiali. Effect and mechanism of Epoxy patchouli on anti - inflammation and anti - gastric ulcer. Traditional Chinese Medicine University Of Guangzhou (2018).                |
| 388 | HX                    | TP53 (P53)           | /  |                                                                                                                                                                                                                                                                                                                                                                                                                                                                                                                            |                                                                                                                                                                                   |
| 389 | HX                    | BCL2                 | /  |                                                                                                                                                                                                                                                                                                                                                                                                                                                                                                                            |                                                                                                                                                                                   |
| 390 | HX(Patchouli alcohol) | TGFB1(TGF $\beta$ 1) | -1 | <p>PA has a mild hypotensive effect, and its mechanism may be related to inhibiting RAS and reducing TGF-TGF 1 and PAI-1 levels</p>                                                                                                                                                                                                                                                                                                                                                                                        | Hu Guanying. Study on the mechanism of action of peregrine alcohol in the treatment of hypertensive renal damage. Chengdu University of TCM (2018).                               |
| 391 | HX( Patchouli oil )   | MAPK1                | -1 | <p>The results showed that the content of MDA, p38MAPK, Ras, Raf, MEK, ERK1 /2, Bax, Caspase9,</p>                                                                                                                                                                                                                                                                                                                                                                                                                         | Song Qin, Song Jiquan. The effect of Patchouli oil on photoaging skin rats and the involvement of p38MAPK /E R K signaling                                                        |

C -Fos and C -Jun were increased greatly (P<0.01).while the expression of Bcl2, SOD, GSHPX and CAT were decreased significantly(P<0.01)in model rats. The results also showed that these abnormal expressions were alleviated greatly after the medication of patchouli oil. At the mean time, the effect of Patchouli oil had a dose dependent manner(P<0.01).

Wuwei Changyanning can reduce the levels of inflammatory cytokines TNF- $\alpha$  and IL-8 in the serum of diseased rats and increase the levels of anti-inflammatory cytokines IL-10.It can reduce the content of MDA in the colon tissues of rats and increase the content of SOD and GSH-PX, indicating that it can restore normal immune function and reduce the damage and inflammation of colon mucosa in rats by down-regulating inflammatory cytokines and up-regulating anti-inflammatory cytokines and scavenging oxygen free radicals.

pathway. Journal of Clinical and Experimental Medicine 15, 2191-2194 (2016).

Yang Xian. Evaluation and quality control of the efficacy of Wuwei Changyanning in the treatment of ulcerative colitis.Chongqing University (2012).

Patchouli ketone can suppress the macrophages induced by LPS in the NF- $\kappa$ B JNK/SAPK and activation of p38MAPK signal transduction pathways, prompt Patchouli ketone of LPS in mice induced by endotoxin shock protection mechanism, may be its blocking the NF- $\kappa$ B of LPS activated cells and MAPK signal

Li Yucui. Anti-inflammatory and antifungal activities and drug metabolism of Patchouli ketone and epimedium alcohol. Traditional Chinese Medicine University Of Guangzhou (2013).

392 HX(Wuwei Changyanning) CXCL8 (IL8) -1

393 HX CRP /

394 HX CCL2 /

395 HX(Patchouli ketone) MAPK8 -1

|     |                       |            |    |                                                                                                                                                                                                                                                                                                                                                                                                                                                                                                                                                                                                                                                                                                                                                                                                                                                                                                                                                                                                                                                                                                                                                                                                                                                                                                                                                                                                                                                                    |                                                                                                                                                                                                                        |
|-----|-----------------------|------------|----|--------------------------------------------------------------------------------------------------------------------------------------------------------------------------------------------------------------------------------------------------------------------------------------------------------------------------------------------------------------------------------------------------------------------------------------------------------------------------------------------------------------------------------------------------------------------------------------------------------------------------------------------------------------------------------------------------------------------------------------------------------------------------------------------------------------------------------------------------------------------------------------------------------------------------------------------------------------------------------------------------------------------------------------------------------------------------------------------------------------------------------------------------------------------------------------------------------------------------------------------------------------------------------------------------------------------------------------------------------------------------------------------------------------------------------------------------------------------|------------------------------------------------------------------------------------------------------------------------------------------------------------------------------------------------------------------------|
| 396 | HX(Patchouli alcohol) | FOS(C-FOS) | +1 | <p>transduction pathway, and regulate the expression of related genes, inflammatory mediators eventually curb excessive inflammatory mediators.</p> <p>In the rat model of gastric ulcer induced by anhydrous ethanol, the contents of SOD GSH and CAT were increased and the content of MDA was decreased to inhibit oxidative stress after administration of different doses of -patchouli by gavage.Reduced TNF-<math>\alpha</math>, IL-1<math>\beta</math> and IL-6 levels, as well as down-regulated phosphorylation of p65 and I<math>\kappa</math>B proteins to inhibit NF-<math>\kappa</math>B signaling and reduce inflammation.It can down-regulate the protein expression of Fas, FasL and caspase-3, up-regulate the gene expression of c-fos, c-jun and miR-21 and the phosphorylation level of ERK1/2 to inhibit the apoptosis of gastric mucosal cells.</p> <p>Epoxopatchouli significantly reduced the levels of proinflammatory cytokines such as TNF-<math>\alpha</math>, IL-1<math>\beta</math> and IL-6 in the foot tissue, but also increased the levels of anti-inflammatory cytokines such as IL-4 and IL-10.Epoxy patchouli significantly down-regulated the expression of COX-2 and iNOS signaling pathways. Compared with the model control group, the fecal water content of the Patchouli oil group in the positive control group was all reduced, the defecation time was all prolonged, the serum SIgA, IL-4, IL-10 level of the</p> | <p>Liu Yuhong.Study on the anti - gastric ulcer and ulcerative colitis by - patchouli alcohol metabolite in gastric juice. Traditional Chinese Medicine University Of Guangzhou (2018).</p>                            |
| 397 | HX(Epoxy patchouli )  | IL4        | +1 | <p>Epoxopatchouli significantly reduced the levels of proinflammatory cytokines such as TNF-<math>\alpha</math>, IL-1<math>\beta</math> and IL-6 in the foot tissue, but also increased the levels of anti-inflammatory cytokines such as IL-4 and IL-10.Epoxy patchouli significantly down-regulated the expression of COX-2 and iNOS signaling pathways. Compared with the model control group, the fecal water content of the Patchouli oil group in the positive control group was all reduced, the defecation time was all prolonged, the serum SIgA, IL-4, IL-10 level of the</p>                                                                                                                                                                                                                                                                                                                                                                                                                                                                                                                                                                                                                                                                                                                                                                                                                                                                            | <p>Liang Jiali. Effect and mechanism of Epoxy patchouli on anti - inflammation and anti - gastric ulcer.Traditional Chinese Medicine University Of Guangzhou (2018).</p>                                               |
| 398 | HX(Patchouli oil )    | IL4        |    | <p>Compared with the model control group, the fecal water content of the Patchouli oil group in the positive control group was all reduced, the defecation time was all prolonged, the serum SIgA, IL-4, IL-10 level of the</p>                                                                                                                                                                                                                                                                                                                                                                                                                                                                                                                                                                                                                                                                                                                                                                                                                                                                                                                                                                                                                                                                                                                                                                                                                                    | <p>Huang Hongke, Luo Jianwei,Lli Xiaoting et al. Effect of Patchouli oil on intestinal mucosal barrier in rats with post-infectious irritable bowel syndrome. Chinese Journal of Nosocomiology 28, 971-974 (2018).</p> |

relative contents of the colon tissues zo-1 and occludin was all increased, and the TNF- $\alpha$  level was decreased (P<0.05).(Positive control group (patchouli zhengqi liquid 3.3ml /kg) and Patchouli oil group (Patchouli oil 3.0g /kg)).

399 HX IL1AIL-1  
 $\alpha$ ) /

400 HX STAT1 /

Rhizoma atractylodis and ageratum naphtha can be raised by G2M phase, S phase proportion in epithelial cell cycle, promote cell proliferation, improve cell vitality;Up-regulation of gene expression of EGF and EGFR, and regulation of ICE-6 cell activity/cell cycle cell proliferation and repair of cell damage by regulating P-ERK1 /ERK2 signaling proteins in the MAPK signaling channel.

401 HX( Ageratum naphtha) EGFR

+1

Immunohistochemical results showed that the expression of EGFR in gastric mucosa of rats in the model group was decreased (P<0.05), Huoxiang zhengqi liquid group increased significantly (P<0.05);Conclusion: Huoxiang zhengqi liquid can significantly improve the symptoms of spleen deficiency in rats with wet resistance syndrome and has a protective effect on gastric mucosa damage. The mechanism may be related to enhancing the ability of the body to resist oxidative stress and increasing the

402 HX EGFR

Liu Fenghua. The repair mechanism of heat stress on intestinal epithelial cell damage and cooling granules in pigs. Nanjing Agricultural University (2009).

Xue Xiaoqian, Huang Xuekuan, Gao Ning et al. Effects of Huoxiang Zhengqi Liquid on the Anti-oxidation and Expression of EGFR in Gastric Mucosa of Rats with Dampness Retention Syndrome. Chinese Journal of Experimental Traditional Medical Formulae 18,230-234(2012).

|     |                      |                      |    |                                                                                                                                                                                                                                                                                                                                                                                                                                                                 |                                                                                                                                                                                                                                           |
|-----|----------------------|----------------------|----|-----------------------------------------------------------------------------------------------------------------------------------------------------------------------------------------------------------------------------------------------------------------------------------------------------------------------------------------------------------------------------------------------------------------------------------------------------------------|-------------------------------------------------------------------------------------------------------------------------------------------------------------------------------------------------------------------------------------------|
| 403 | HX                   | CXCL10               | /  | expression of gastric mucosa EGFR.                                                                                                                                                                                                                                                                                                                                                                                                                              |                                                                                                                                                                                                                                           |
| 404 | HX(Patchouli ketone) | SOD1                 | +1 | Serum levels of TNF- $\alpha$ , IL-6, IL-1 $\beta$ and MDA were decreased in dexamethasone group and patchoulone group, SOD content all increased.<br>After treatment with 40, 60 and 80 g/mL of patchouli, the expression levels of activated caspase-9, activated caspase-3, and shear PRAP-1 proteins and Bax/ BCL-2 values in SGC-996 cells were significantly increased (all P < 0.05)                                                                     | Zhang Weina, Zhang Mingming, Yu Min. Study on protective mechanism of Patchouli ketone on lung injury in COPD mice. Health Studies 39, 428-431(2019).                                                                                     |
| 405 | HX(Patchoulone)      | PARP1                | +1 |                                                                                                                                                                                                                                                                                                                                                                                                                                                                 | Wu Yaoshi, Huang Yuan, Dong Jiahong. Patchoulone inhibits the proliferation of human gallbladder carcinoma SGC-996 cells. Tumor 37,50-57(2017).                                                                                           |
| 406 | HX                   | CASP8                | +1 |                                                                                                                                                                                                                                                                                                                                                                                                                                                                 | Kim, J. Y., Kim, E. H., Park, S. S. et al.. Quercetin sensitizes human hepatoma cells to TRAIL-induced apoptosis via Sp1-mediated DR5 up-regulation and proteasome-mediated c-FLIPS down-regulation. J Cell Biochem 105, 1386-1398(2008). |
| 407 | HX                   | IFNG(IFN- $\gamma$ ) | /  |                                                                                                                                                                                                                                                                                                                                                                                                                                                                 |                                                                                                                                                                                                                                           |
| 408 | HX                   | IL2                  | /  |                                                                                                                                                                                                                                                                                                                                                                                                                                                                 |                                                                                                                                                                                                                                           |
| 409 | HX( Patchouli oil )  | CAT                  | +1 | The results showed that the content of MDA, p38MAPK, Ras, Raf, MEK, ERK1 /2, Bax, Caspase9, C -Fos and C -Jun were increased greatly (P<0.01) while the expression of Bcl2, SOD, GSHPX and CAT were decreased significantly (P<0.01) in model rats . The results also showed that these abnormal expressions were alleviated greatly after the medication of patchouli oil . At the mean time, the effect of Patchouli oil had a dose dependent manner (P<0.01) | Song Qin, Song Jiquan. The effect of Patchouli oil on photoaging skin rats and the involvement of p38MAPK /E R K signaling pathway. Journal of Clinical and Experimental Medicine 15, 2191-2194 (2016).                                   |

|     |                       |              |    |                                                                                                                                                                                                                                                                                                                                                                                                                                                                                                                                                                                                                                                                                                                                                                                                                                                                                                                                                                                                                                                                                                                                                                           |                                                                                                                                                                                                                      |
|-----|-----------------------|--------------|----|---------------------------------------------------------------------------------------------------------------------------------------------------------------------------------------------------------------------------------------------------------------------------------------------------------------------------------------------------------------------------------------------------------------------------------------------------------------------------------------------------------------------------------------------------------------------------------------------------------------------------------------------------------------------------------------------------------------------------------------------------------------------------------------------------------------------------------------------------------------------------------------------------------------------------------------------------------------------------------------------------------------------------------------------------------------------------------------------------------------------------------------------------------------------------|----------------------------------------------------------------------------------------------------------------------------------------------------------------------------------------------------------------------|
| 410 | HX(Patchouli alcohol) | IL10         | +1 | In the lps-induced model of RAW264.7 cell inflammation in vitro, 10, 20 and 40 mol/L of patchouli intervention reduced the level of PGE2 NO TNF- $\alpha$ and increased the level of IL-10, down-regulated the mRNA expression of COX-2 iNOS TNF- $\alpha$ and up-regulated the mRNA expression of IL-6 IL-1, thus slowing down the inflammatory response. Epoxopatchouli significantly reduced the levels of proinflammatory cytokines such as TNF- $\alpha$ , IL-1 $\beta$ and IL-6 in the foot tissue, but also increased the levels of anti-inflammatory cytokines such as IL-4 and IL-10. Epoxide patchouli significantly down-regulated the expression of COX-2 and iNOS signaling pathways. Compared with the model control group, the fecal water content of the Patchouli oil group in the positive control group was all reduced, the defecation time was all prolonged, the serum SIgA, IL-4, IL-10 level of the relative contents of the colon tissues ZO-1 and occludin was all increased, and the TNF- $\alpha$ level was decreased (P<0.05). (Positive control group (patchouli zhengqi liquid 3.3ml/kg) and Patchouli oil group (Patchouli oil 3.0g/kg)). | Liu Yuhong. Study on the anti-gastric ulcer and ulcerative colitis by patchouli alcohol metabolite in gastric juice. Traditional Chinese Medicine University Of Guangzhou (2018).                                    |
| 411 | HX(Epoxy patchouli)   | IL10         | +1 | Epoxopatchouli significantly reduced the levels of proinflammatory cytokines such as TNF- $\alpha$ , IL-1 $\beta$ and IL-6 in the foot tissue, but also increased the levels of anti-inflammatory cytokines such as IL-4 and IL-10. Epoxide patchouli significantly down-regulated the expression of COX-2 and iNOS signaling pathways. Compared with the model control group, the fecal water content of the Patchouli oil group in the positive control group was all reduced, the defecation time was all prolonged, the serum SIgA, IL-4, IL-10 level of the relative contents of the colon tissues ZO-1 and occludin was all increased, and the TNF- $\alpha$ level was decreased (P<0.05). (Positive control group (patchouli zhengqi liquid 3.3ml/kg) and Patchouli oil group (Patchouli oil 3.0g/kg)).                                                                                                                                                                                                                                                                                                                                                            | Liang Jiali. Effect and mechanism of Epoxy patchouli on anti-inflammation and anti-gastric ulcer. Traditional Chinese Medicine University Of Guangzhou (2018).                                                       |
| 412 | HX( Patchouli oil )   | IL10         | +1 | Epoxopatchouli significantly reduced the levels of proinflammatory cytokines such as TNF- $\alpha$ , IL-1 $\beta$ and IL-6 in the foot tissue, but also increased the levels of anti-inflammatory cytokines such as IL-4 and IL-10. Epoxide patchouli significantly down-regulated the expression of COX-2 and iNOS signaling pathways. Compared with the model control group, the fecal water content of the Patchouli oil group in the positive control group was all reduced, the defecation time was all prolonged, the serum SIgA, IL-4, IL-10 level of the relative contents of the colon tissues ZO-1 and occludin was all increased, and the TNF- $\alpha$ level was decreased (P<0.05). (Positive control group (patchouli zhengqi liquid 3.3ml/kg) and Patchouli oil group (Patchouli oil 3.0g/kg)).                                                                                                                                                                                                                                                                                                                                                            | Huang Hongke, Luo Jianwei, Lli Xiaoting et al. Effect of Patchouli oil on intestinal mucosal barrier in rats with post-infectious irritable bowel syndrome. Chinese Journal of Nosocomiology 28, 971-974+990 (2018). |
| 413 | HX                    | HMOX1( HO-1) | +1 | $\beta$ -patchouli ene anti infective inflammation effect of p-patchouli ene, after the treatment can significantly improve the acute lung injury induced by LPS in mice survival rate, reduce the damage rate of the lung tissue                                                                                                                                                                                                                                                                                                                                                                                                                                                                                                                                                                                                                                                                                                                                                                                                                                                                                                                                         | Chen Xiaoying. Anti-inflammatory action and mechanism of patchouli-linn. Guangzhou University of TCM (2016).                                                                                                         |

and edema, inhibit LPS induced the increase of MDA, MPO level in the lung tissue, lower alveolar lavage fluid of TNF- $\alpha$ , IL-1 $\beta$  and IL-6, raised Nrf2 and downstream antioxidant gene NQO1 GCLC mRNA and HO - 1 protein expression  
 Patchoulenone significantly induced the apoptosis of SGC-996 cells after treatment with 40, 60 and 80  $\mu$ g/mL patchoulenone and led to S-phase cell-cycle arrest (all P < 0.05). The expression levels of cleaved caspase-9, cleaved caspase-3, cleaved PARP-1 protein and the ratio of Bax to Bcl-2 in SGC-996 cells after treatment with 40, 60 and 80  $\mu$ g/mL were up-regulated (all P < 0.05), whereas the expression levels of cyclin D1, cyclin A and cyclin B1 were down-regulated (all P < 0.01)

414 HX(Patchoulenone) BAX +1

Wu Yaoshi, Huang Yuan, Dong Jiahong. Patchoulenone inhibits the proliferation of human gallbladder carcinoma SGC-996 cells. *Tumor* 37,50-57(2017).

---

414 literatures were found, using CNKI, PubMed, Web of Science and other literature database, to confirm the regulatory directions by 8 herbs. The searching key words included all of the synonyms of herbs and targets. Some other potential key words were used as well, such as one specific ingredient of the herb, a recipe containing one herb and some multiple treatments but including the herb, etc. which were noted in the brackets. Over 3 Literature largely corresponded to each herb with each target. The literatures involved were classed by IF (Impact Factor), study models (e.g., peripheral was better than neural, in vivo was superior in vitro, etc.), etc. We would further assess the direction based on these above rules. 8 herbs were named by the acronyms. The symbols were similar with Supplementary Table 5, which were used for indicating the regulation. Specifically, “+1” was up-regulated, “-1” was down-regulated, “/” was not listed, “-” indicated no effect. The key points were listed in details, and the literature references were attached as well.



**Table S7. The preferable docking results among 919 ingredients of 8 herbs.**

| NO. | Compounds CID | Compounds Name       | Docking Gscore (kcal/mol) 6LU7# | Docking Gscore (kcal/mol)6VSB# | Label in Fig 4G          | Source Herbs                                                                                                      |
|-----|---------------|----------------------|---------------------------------|--------------------------------|--------------------------|-------------------------------------------------------------------------------------------------------------------|
| 1   | 44258007      | Madreselvin B        | -9.017                          | -8.588                         | Red Dot (High in Both)   | JYH(Flos Lonicerae, 金银花, Jin Yin Hua)                                                                             |
| 2   | 5280805       | Rutin                | -9.225                          | -6.377                         | Blue Dot (High in 6LU7)  | LQ (Fructus Forsythiae, 连翘, Lian Qiao),<br>MH(Herba Ephedrae, 麻黄, Ma Huang), GC (Radix Glycyrrhizae, 甘草, Gan Cao) |
| 3   | 44259671      | Madreselvin A        | -7.626                          | -8.88                          | Green Dot (High in 6VSB) | JYH(Flos Lonicerae, 金银花, Jin Yin Hua)                                                                             |
| 4   | 42607811      | Licorice glycoside E | -8.258                          | -8.74                          | Green Dot (High in 6VSB) | GC (Radix Glycyrrhizae, 甘草, Gan Cao)                                                                              |
| 5   | 6079994       | Icos-5-enoic acid    | -7.053                          | -8.563                         | Green Dot (High in 6VSB) | GC (Radix Glycyrrhizae, 甘草, Gan Cao)                                                                              |
| 6   | 486612        | Matairesinoside      | -7.284                          | -8.448                         | Green Dot (High in 6VSB) | LQ (Fructus Forsythiae, 连翘, Lian Qiao)                                                                            |
| 7   | 442428        | Naringin             | -6.891                          | -8.371                         | Green Dot (High in 6VSB) | GC (Radix Glycyrrhizae, 甘草, Gan Cao)                                                                              |
| 8   | 10009317      | B-hydroxyacteoside   | -8.383                          | -8.327                         | Green Dot (High in 6VSB) | LQ (Fructus Forsythiae, 连翘, Lian Qiao)                                                                            |

|    |           |                      |        |        |                                                       |                                                                         |
|----|-----------|----------------------|--------|--------|-------------------------------------------------------|-------------------------------------------------------------------------|
| 9  | 3081212   | Fulvotomentoside A   | -5.949 | -8.24  | Green Dot (High in 6VSB)                              | JYH (Flos Lonicerae, 金银花, Jin Yin Hua)                                  |
| 10 | 131484    | Astrachryoside A     | -7.45  | -8.226 | Green Dot (High in 6VSB)                              | HQi (Radix Astragali seu Hedysari, 黄芪, Huang Qi)                        |
| 11 | 127984    | Astrasieversianin XV | -8.632 | -8.21  | Green Dot (High in 6VSB)                              | HQi (Radix Astragali seu Hedysari, 黄芪, Huang Qi)                        |
| 12 | 14564503  | Macranthoidin A      | -7.597 | -7.959 | Green Dot (High in 6VSB)                              | JYH (Flos Lonicerae, 金银花, Jin Yin Hua)                                  |
| 13 | 132550846 | Suspensaside B       | -9.491 | -7.682 | Blue Dot (High in 6LU7)                               | LQ (Fructus Forsythiae, 连翘, Lian Qiao)                                  |
| 14 | 9986606   | Plantainoside A      | -9.116 | -7.63  | Blue Dot (High in 6LU7)                               | LQ (Fructus Forsythiae, 连翘, Lian Qiao)                                  |
| 15 | 10291003  | Euchrenone           | -9.133 | -6.43  | Blue Dot (High in 6LU7)                               | GC (Radix Glycyrrhizae, 甘草, Gan Cao)                                    |
| 16 | 5318767   | Nicotiflorin         | -8.966 | -5.972 | Blue Dot (High in 6LU7)                               | GC (Radix Glycyrrhizae, 甘草, Gan Cao)                                    |
| 17 | 932       | Naringenin           | -8.764 | -5.553 | Blue Dot (High in 6LU7)                               | MH (Herba Ephedrae, 麻黄, Ma Huang), GC (Radix Glycyrrhizae, 甘草, Gan Cao) |
| 18 | 121304016 | Remdesivir           | -8.738 | -6.754 | Orange Dot (The Best Control among docking with 6LU7) | The Best Control within 6VSB                                            |
| 19 | 392622    | Ritonavir            | -8.089 | -7.828 | Orange Dot (The Best Control among docking with 6VSB) | The Best Control within 6LU7                                            |
| 20 | 92727     | Lopinavir            | -7.794 | -7.037 | Orange Dot (Control)                                  | Positive Control                                                        |
| 21 | 131411    | Arbidol              | -6.487 | -3.934 | Orange Dot (Control)                                  | Positive Control                                                        |

|    |        |                       |        |        |                      |                  |
|----|--------|-----------------------|--------|--------|----------------------|------------------|
| 22 | 37542  | Ribavirin             | -6.159 | -5.977 | Orange Dot (Control) | Positive Control |
| 23 | 64927  | Chloroquine Phosphate | -5.936 | -4.634 | Orange Dot (Control) | Positive Control |
| 24 | 492405 | Favipiravir (T705)    | -5.313 | -5.489 | Orange Dot (Control) | Positive Control |

The preferable docking ingredients, with better efficiency either to only 6LU7, 6VSB or the both, were corresponded to herbs in turn based on the TCMSP database. The docking glide gscores, which indicates the docking energy or affinity with receptor (the lower, the better), were shown in details. The last seven (NO. 18 to NO.24) were the positive controls, which were reported as the potential drugs for combating SARS-CoV-2. Remdesivir (NO.18) and Ritonavir (NO.19) were the best control with 6VSB and 6LU7 respectively. Source herbs were presented in different names, including acronyms, Latin name, Chinese name and Chinese Pin Yin. Fig 4 H pictured this data. The full docking results of 8 herbs (919 unique ingredients) were listed in the Supplementary Table 8.

**Table S8. The entire results of 919 ingredients from 8 herbs docking with the two core structures (6LU7 & 6VSB) of SAR-CoV-2.**

| NO. | CID       | Molecule Name        | Docking gscore (kcal/mol) 6VSB# | Docking gscore (kcal/mol) 6LU7# | Label                        |
|-----|-----------|----------------------|---------------------------------|---------------------------------|------------------------------|
| 1   | 44259671  | madreselvin A        | -8.88                           | -7.626                          | High in 6VSB                 |
| 2   | 42607811  | licorice glycoside E | -8.74                           | -8.258                          | High in 6VSB                 |
| 3   | 44258007  | madreselvin B        | -8.588                          | -9.017                          | High in Both                 |
| 4   | 132550846 | suspensaside B       | -7.682                          | -9.491                          | High in 6LU7                 |
| 5   | 392622    | Ritonavir            | -7.828                          | -8.089                          | The Best Control within 6VSB |
| 6   | 51666248  | neoliquiritin        | -7.692                          | -6.649                          | Relatively Low               |
| 7   | 6079994   | icos-5-enoic acid    | -8.563                          | -7.053                          | High in 6VSB                 |
| 8   | 486612    | Matairesinoside      | -8.448                          | -7.284                          | High in 6VSB                 |

|    |           |                                        |        |        |                |
|----|-----------|----------------------------------------|--------|--------|----------------|
| 9  | 442428    | naringin                               | -8.371 | -6.891 | High in 6VSB   |
| 10 | 10009317  | B-hydroxyacteoside                     | -8.327 | -8.383 | High in 6VSB   |
| 11 | 3081212   | fulvotomentoside A                     | -8.24  | -5.949 | High in 6VSB   |
| 12 | 131484    | astrachryoside A                       | -8.226 | -7.45  | High in 6VSB   |
| 13 | 127984    | astrasieversianin XV                   | -8.21  | -8.632 | High in 6VSB   |
| 14 | 14564503  | macranthoidin A                        | -7.959 | -7.597 | High in 6VSB   |
| 15 | 107876    | Procyanidin                            | -7.677 | -8.29  | Relatively Low |
| 16 | 118705380 | Akebiasaponin D                        | -7.671 | -6.655 | Relatively Low |
| 17 | 9986606   | plantainoside A                        | -7.63  | -9.116 | High in 6LU7   |
| 18 | 101938907 | Licorice glycoside A                   | -7.551 | -7.601 | Relatively Low |
| 19 | 73356106  | EEE                                    | -7.556 | -6.983 | Relatively Low |
| 20 | 5281800   | acteoside                              | -7.513 | -6.964 | Relatively Low |
| 21 | 6442994   | Forsythoside F                         | -7.512 | -8.263 | Relatively Low |
| 22 | 5281773   | Forsythiaside                          | -7.491 | -7.575 | Relatively Low |
| 23 | 5282150   | Rhoifolin                              | -7.48  | -7.198 | Relatively Low |
| 24 | 101231533 | Forsythoside G                         | -7.456 | -8.116 | Relatively Low |
| 25 | 6474310   | isochlorogenic,acid                    | -7.425 | -6.246 | Relatively Low |
| 26 | 503737    | liquiritin                             | -7.41  | -6.627 | Relatively Low |
| 27 | 5281798   | suspensaside A                         | -7.391 | -8.443 | Relatively Low |
| 28 | 5280441   | vitexin                                | -7.367 | -6.805 | Relatively Low |
| 29 | 101606424 | gancaonin T                            | -7.301 | -7.1   | Relatively Low |
| 30 | 122097    | Soyasaponin I                          | -7.231 | -5.189 | Relatively Low |
| 31 | 5353588   | 5,8,2'-Trihydroxy-7-methoxy<br>flavone | -7.187 | -8.643 | Relatively Low |
| 32 | 10621     | hesperidin                             | -7.174 | -7.762 | Relatively Low |
| 33 | 102183195 | Centauroside                           | -7.072 | -6.175 | Relatively Low |

|    |           |                                   |        |        |                |
|----|-----------|-----------------------------------|--------|--------|----------------|
| 34 | 73296     | Helixin                           | -7.072 | -7.079 | Relatively Low |
| 35 | 3037925   | methyl-9-methyl<br>tetradecanoate | -7.051 | -6.692 | Relatively Low |
| 36 | 5315651   | campneoside                       | -7.048 | -8.046 | Relatively Low |
| 37 | 23928102  | Forsythoside B                    | -6.97  | -8.383 | Relatively Low |
| 38 | 131753130 | 6U-O-acetyllicuritin              | -6.96  | -7.654 | Relatively Low |
| 39 | 5282152   | Scolymoside                       | -6.916 | -6.341 | Relatively Low |
| 40 | 5281255   | Corylifolinin                     | -7.02  | -7.809 | Relatively Low |
| 41 | 163744    | uralsaponin B                     | -6.857 | -5.422 | Relatively Low |
| 42 | 5320092   | neoisoliquiritin                  | -6.893 | -6.056 | Relatively Low |
| 43 | 442664    | Vicenin-2                         | -6.857 | -7.332 | Relatively Low |
| 44 | 5318591   | Isoliquiritin                     | -7.06  | -6.232 | Relatively Low |
| 45 | 91895373  | Isomartynoside                    | -6.744 | -7.753 | Relatively Low |
| 46 | 5280637   | luteolin                          | -6.727 | -6.315 | Relatively Low |
| 47 | 71629     | Resivit                           | -6.69  | -7.404 | Relatively Low |
| 48 | 480816    | Gancaonin S                       | -6.69  | -6.742 | Relatively Low |
| 49 | 134694234 | AstragalosideIV                   | -6.681 | -7.401 | Relatively Low |
| 50 | 5282451   | NK                                | -6.679 | -7.878 | Relatively Low |
| 51 | 5317756   | Glycycomarin                      | -6.658 | -6.934 | Relatively Low |
| 52 | 12314162  | PHILLYRIN                         | -6.65  | -7.009 | Relatively Low |
| 53 | 5280704   | apigenin                          | -6.609 | -6.341 | Relatively Low |
| 54 | 442665    | violanthin                        | -6.61  | -7.278 | Relatively Low |
| 55 | 442658    | schaftoside                       | -6.595 | -7.67  | Relatively Low |
| 56 | 480783    | 8-Prenylwighteone                 | -6.553 | -5.975 | Relatively Low |
| 57 | 101939210 | glycyroside                       | -6.501 | -7.127 | Relatively Low |
| 58 | 11168362  | (+)-epipinoresinol-4'-O-D-gl      | -6.474 | -6.882 | Relatively Low |

|    |           |                                               |        |        |                |
|----|-----------|-----------------------------------------------|--------|--------|----------------|
|    |           | ucoside                                       |        |        |                |
| 59 | 195342    | Araboglycyrrhizin                             | -6.454 | -6.071 | Relatively Low |
| 60 | 195343    | apioglycyrrhizin                              | -6.444 | -5.267 | Relatively Low |
| 61 | 3084961   | Oroxindin                                     | -6.441 | -6.827 | Relatively Low |
| 62 | 10291003  | euchrenone                                    | -6.43  | -9.133 | High in 6LU7   |
| 63 | 142443859 | 1,5,8-trimethyl-1,2-dihydro-naphthalene       | -6.421 | -5.978 | Relatively Low |
| 64 | 6438452   | [(3R)-3,7-dimethylocta-1,6-dien-3-yl] acetate | -7.466 | -7.942 | Relatively Low |
| 65 | 68245     | delphinidin                                   | -6.526 | -6.823 | Relatively Low |
| 66 | 5281792   | rosmarinic acid                               | -6.416 | -5.873 | Relatively Low |
| 67 | 9064      | (+)-catechin                                  | -6.392 | -6.945 | Relatively Low |
| 68 | 5316900   | 3,5-Dihydroxy-4',7-dimethoxyflavone           | -6.408 | -6.285 | Relatively Low |
| 69 | 101665834 | acetylastragaloside I                         | -6.354 | -3.641 | Relatively Low |
| 70 | 6450959   | Gancaonin C                                   | -6.359 | -7.448 | Relatively Low |
| 71 | 5280805   | rutin                                         | -6.377 | -9.225 | High in 6LU7   |
| 72 | 480818    | Gancaonin U                                   | -6.322 | -7.541 | Relatively Low |
| 73 | 9015      | MEHQ                                          | -6.304 | -6.035 | Relatively Low |
| 74 | 5273570   | (-)-Olivir                                    | -6.287 | -6.269 | Relatively Low |
| 75 | 5280633   | Neochlorogenic acid                           | -6.264 | -6.584 | Relatively Low |
| 76 | 5319160   | 4,5-di-O-caffeoylquinic acid methyl ester     | -6.252 | -6.947 | Relatively Low |
| 77 | 480817    | Gancaonin V                                   | -6.217 | -6.997 | Relatively Low |
| 78 | 44593361  | orobanchoside                                 | -6.211 | -5.974 | Relatively Low |
| 79 | 480802    | Gancaonin Q                                   | -6.223 | -6.507 | Relatively Low |

|     |          |                                                                 |        |        |                |
|-----|----------|-----------------------------------------------------------------|--------|--------|----------------|
| 80  | 62074    | Glycyram                                                        | -6.212 | -5.107 | Relatively Low |
| 81  | 14982    | glycyrrhizin                                                    | -6.212 | -5.107 | Relatively Low |
| 82  | 441457   | Cathine                                                         | -6.217 | -5.79  | Relatively Low |
| 83  | 69634125 | Forsythoside E                                                  | -6.205 | -6.91  | Relatively Low |
| 84  | 5281789  | Licoisoflavone                                                  | -6.222 | -6.55  | Relatively Low |
| 85  | 5282151  | vitexin                                                         | -6.244 | -6.525 | Relatively Low |
| 86  | 10336244 | shinpterocarpin                                                 | -6.187 | -5.597 | Relatively Low |
| 87  | 5282166  | quercetin 7-O- $\beta$ -D-glucoside                             | -6.205 | -8.025 | Relatively Low |
| 88  | 5282102  | kaempferol                                                      | -6.181 | -7.954 | Relatively Low |
| 89  | 503731   | Licocoumarone                                                   | -6.153 | -7.089 | Relatively Low |
| 90  | 442813   | Ononin                                                          | -6.152 | -5.665 | Relatively Low |
| 91  | 5317480  | Lupiwighteone                                                   | -6.156 | -7.138 | Relatively Low |
| 92  | 3286789  | leucopelargonidin                                               | -6.144 | -8.652 | Relatively Low |
| 93  | 5317300  | Eurycarpin A                                                    | -6.15  | -7.145 | Relatively Low |
| 94  | 5315127  | Uralenol-3-methylether                                          | -6.174 | -6.125 | Relatively Low |
| 95  | 10052718 | 3,4-Dicaffeoylquinic acid                                       | -6.14  | -6.666 | Relatively Low |
| 96  | 5318585  | Isolicoflavonol                                                 | -6.155 | -7.088 | Relatively Low |
| 97  | 5317765  | Glycyrrhiza flavonol A                                          | -6.152 | -6.993 | Relatively Low |
| 98  | 100528   | arctiin                                                         | -6.109 | -5.948 | Relatively Low |
| 99  | 892      | inositol                                                        | -6.106 | -5.934 | Relatively Low |
| 100 | 5481663  | Narcissoside                                                    | -6.129 | -7.743 | Relatively Low |
| 101 | 73205    | Sigmoidin-B                                                     | -6.112 | -6.615 | Relatively Low |
| 102 | 480859   | Glyasperin C                                                    | -6.072 | -6.541 | Relatively Low |
| 103 | 194727   | EIC                                                             | -6.072 | -4.383 | Relatively Low |
| 104 | 13889020 | 5-Hydroxy-7-O- $\beta$ -D-glucopyranosyl-4'-trimethoxyflavanone | -6.043 | -6.751 | Relatively Low |

|     |           |                          |        |        |                |
|-----|-----------|--------------------------|--------|--------|----------------|
| 105 | 12889143  | licorice-saponin H2      | -6.044 | -5.086 | Relatively Low |
| 106 | 5318267   | Calycosin                | -6.027 | -5.929 | Relatively Low |
| 107 | 14135325  | Dihydrobaicalin          | -6.014 | -6.352 | Relatively Low |
| 108 | 64982     | Baicalin                 | -5.997 | -6.273 | Relatively Low |
| 109 | 101422758 | Isoviolanthin            | -6.026 | -7.869 | Relatively Low |
| 110 | 92123     | Picein                   | -5.984 | -6.302 | Relatively Low |
| 111 | 439533    | taxifolin                | -6.007 | -7.306 | Relatively Low |
| 112 | 332427    | Lariciresinol            | -5.976 | -7.631 | Relatively Low |
| 113 | 6101      | Daturic acid             | -5.975 | -5.388 | Relatively Low |
| 114 | 442154    | Afzelechin               | -5.975 | -8.267 | Relatively Low |
| 115 | 5280544   | Herbacetin               | -5.982 | -7.497 | Relatively Low |
| 116 | 96506     | Nortangeretin            | -6.001 | -8.19  | Relatively Low |
| 117 | 5318767   | nicotiflorin             | -5.972 | -8.966 | High in 6LU7   |
| 118 | 5281612   | Diosmetin                | -5.976 | -5.96  | Relatively Low |
| 119 | 17047     | RNG                      | -5.938 | -6.527 | Relatively Low |
| 120 | 5281631   | Euxanthone               | -5.944 | -6.161 | Relatively Low |
| 121 | 5317483   | Gancaonin A              | -5.948 | -7.614 | Relatively Low |
| 122 | 10259181  | methyl icos-11-enoate    | -5.926 | -6.255 | Relatively Low |
| 123 | 5317570   | Germacrene D             | -5.921 | -5.52  | Relatively Low |
| 124 | 10253785  | Luteolin 7-O-glucuronide | -5.96  | -8.107 | Relatively Low |
| 125 | 5320083   | Glycyrol                 | -5.932 | -6.171 | Relatively Low |
| 126 | 480865    | Licoricidin              | -5.912 | -5.987 | Relatively Low |
| 127 | 442411    | Glepidotin A             | -5.911 | -7.082 | Relatively Low |
| 128 | 8468      | vanillic acid            | -5.906 | -5.377 | Relatively Low |
| 129 | 182232    | ent-Epicatechin          | -5.881 | -6.98  | Relatively Low |
| 130 | 5492110   | Ochnaflavone             | -5.961 | -7.009 | Relatively Low |



|     |           |                           |        |        |                |
|-----|-----------|---------------------------|--------|--------|----------------|
| 131 | 102183193 | 7-epi-Vogeloside          | -5.864 | -5.994 | Relatively Low |
| 132 | 5273755   | eupatilin                 | -5.896 | -7.297 | Relatively Low |
| 133 | 101939796 | vogeloside                | -5.859 | -6.656 | Relatively Low |
| 134 | 129901222 | licorice-saponin B2       | -5.862 | -5.122 | Relatively Low |
| 135 | 5481964   | Licoflavonol              | -5.859 | -6.222 | Relatively Low |
| 136 | 443639    | epi-Afzelechin            | -5.845 | -8.599 | Relatively Low |
| 137 | 5352005   | Retusin                   | -5.831 | -6.209 | Relatively Low |
| 138 | 5280666   | Chryseriol                | -5.861 | -6.734 | Relatively Low |
| 139 | 480815    | Gancaonin R               | -5.813 | -6.403 | Relatively Low |
| 140 | 13254473  | eriodictyol-7-o-glucoside | -5.808 | -6.36  | Relatively Low |
| 141 | 5320946   | Rhamnocitrin              | -5.812 | -7.651 | Relatively Low |
| 142 | 3084995   | Isoschaftoside            | -5.825 | -8.026 | Relatively Low |
| 143 | 14891565  | licorice-saponin C2 qt    | -5.766 | -4.325 | Relatively Low |
| 144 | 9840805   | licochalcone C            | -5.816 | -7.206 | Relatively Low |
| 145 | 5202      | DS                        | -5.726 | -6.519 | Relatively Low |
| 146 | 9294      | Eciphin                   | -5.729 | -5.689 | Relatively Low |
| 147 | 130583    | DFV                       | -5.727 | -6.781 | Relatively Low |
| 148 | 10246505  | Licoflavone               | -5.734 | -7.943 | Relatively Low |
| 149 | 124049    | Glabranin                 | -5.724 | -7.699 | Relatively Low |
| 150 | 392442    | glyasperin F              | -5.768 | -6.996 | Relatively Low |
| 151 | 10548420  | 8-epiloganin              | -5.711 | -6.876 | Relatively Low |
| 152 | 69867     | ICO                       | -5.711 | -5.247 | Relatively Low |
| 153 | 7209      | DEP                       | -5.698 | -6.669 | Relatively Low |
| 154 | 72        | protocatechuic acid       | -5.691 | -5.599 | Relatively Low |
| 155 | 5318645   | isorhamnetin              | -5.72  | -6.988 | Relatively Low |
| 156 | 6508      | quinic acid               | -5.691 | -6.089 | Relatively Low |

|     |           |                                            |        |        |                |
|-----|-----------|--------------------------------------------|--------|--------|----------------|
| 157 | 452864    | licorice-saponin C2                        | -5.685 | -5.409 | Relatively Low |
| 158 | 10296     | ursolic acid                               | -5.666 | -5.653 | Relatively Low |
| 159 | 2725045   | (2S)-2-myristyloxirane                     | -5.689 | -6.825 | Relatively Low |
| 160 | 3010930   | 8-hydroxypinoresinol                       | -5.646 | -6.919 | Relatively Low |
| 161 | 46218174  | 5,2',6'-Trihydroxy-7,8-dimet<br>hoxylavone | -5.679 | -7.762 | Relatively Low |
| 162 | 10076238  | Liquiritin apioside                        | -5.644 | -5.954 | Relatively Low |
| 163 | 676295    | 7,4'-Dihydroxyflavone                      | -6.063 | -6.745 | Relatively Low |
| 164 | 131627    | eth                                        | -5.625 | -5.536 | Relatively Low |
| 165 | 6253      | Arabinose,d                                | -5.616 | -6.12  | Relatively Low |
| 166 | 480784    | glyasperin B                               | -5.619 | -7.154 | Relatively Low |
| 167 | 5280460   | Scopoletol                                 | -5.623 | -5.917 | Relatively Low |
| 168 | 14187587  | isoglycycoumarin                           | -5.614 | -6.283 | Relatively Low |
| 169 | 5320287   | Ombuin                                     | -5.614 | -6.048 | Relatively Low |
| 170 | 231114    | Norlapachol                                | -5.613 | -6.201 | Relatively Low |
| 171 | 5281708   | daidzein                                   | -5.607 | -7.173 | Relatively Low |
| 172 | 440735    | eriodictyol                                | -5.614 | -6.399 | Relatively Low |
| 173 | 135398749 | CHEBI:7                                    | -5.87  | -7.102 | Relatively Low |
| 174 | 5317481   | Gancaonin D                                | -5.588 | -7.168 | Relatively Low |
| 175 | 131420    | Astraisoflavanin                           | -5.58  | -6.837 | Relatively Low |
| 176 | 5280681   | 3-O-Methylquercetin                        | -5.611 | -6.597 | Relatively Low |
| 177 | 11045420  | rengyoside A                               | -5.571 | -6.817 | Relatively Low |
| 178 | 64981     | arctigenin                                 | -5.571 | -7.12  | Relatively Low |
| 179 | 221493    | CHD                                        | -5.559 | -6.086 | Relatively Low |
| 180 | 5318869   | Jaranol                                    | -5.55  | -7.778 | Relatively Low |
| 181 | 3001497   | C10230                                     | -6.862 | -5.205 | Relatively Low |

|     |           |                                   |        |        |                |
|-----|-----------|-----------------------------------|--------|--------|----------------|
| 182 | 44453332  | forsythialan B                    | -5.543 | -6.146 | Relatively Low |
| 183 | 57085343  | 4-[(3R)-3-hydroxybutyl]<br>phenol | -5.657 | -7.324 | Relatively Low |
| 184 | 932       | naringenin                        | -5.553 | -8.764 | High in 6LU7   |
| 185 | 480787    | Glycyrrin                         | -5.535 | -5.463 | Relatively Low |
| 186 | 68262     | DMBQ                              | -5.526 | -5.461 | Relatively Low |
| 187 | 5315126   | Uralenol                          | -5.555 | -6.546 | Relatively Low |
| 188 | 131751372 | Kanzonol Z                        | -5.534 | -6.923 | Relatively Low |
| 189 | 4484952   | Phaseolinisoflavan                | -5.514 | -6.812 | Relatively Low |
| 190 | 2214      | Apocynin                          | -5.546 | -6.088 | Relatively Low |
| 191 | 323       | coumarin                          | -5.505 | -4.967 | Relatively Low |
| 192 | 91520     | catalpol                          | -5.495 | -5.378 | Relatively Low |
| 193 | 5280804   | quercetin                         | -5.521 | -7.255 | Relatively Low |
| 194 | 5281787   | Caffeate                          | -5.49  | -6.387 | Relatively Low |
| 195 | 5318999   | Licochalcone B                    | -5.558 | -6.516 | Relatively Low |
| 196 | 1794427   | Heriguard                         | -5.479 | -5.887 | Relatively Low |
| 197 | 5321205   | Scutevulin                        | -5.51  | -7.264 | Relatively Low |
| 198 | 65348     | 7-epi-Loganin_qt                  | -5.497 | -7.127 | Relatively Low |
| 199 | 4374      | ()-N-Methylephedrine              | -5.562 | -6.688 | Relatively Low |
| 200 | 21238     | Caeruloside C                     | -5.47  | -5.776 | Relatively Low |
| 201 | 88295     | 19889-94-2                        | -5.468 | -5.493 | Relatively Low |
| 202 | 132127    | XLS                               | -6.498 | -7.591 | Relatively Low |
| 203 | 87691     | Loganin                           | -5.462 | -5.566 | Relatively Low |
| 204 | 5315396   | Yinyanghuo D                      | -5.5   | -6.16  | Relatively Low |
| 205 | 7028      | Psi-ephedrin                      | -5.467 | -5.635 | Relatively Low |
| 206 | 5281672   | myricetin                         | -5.482 | -6.125 | Relatively Low |

|     |           |                                     |        |        |                |
|-----|-----------|-------------------------------------|--------|--------|----------------|
| 207 | 11809239  | Cornoside                           | -5.444 | -6.656 | Relatively Low |
| 208 | 13405     | p-Toluyyl chloride                  | -5.443 | -5.521 | Relatively Low |
| 209 | 7947      | Fleet-X                             | -5.441 | -5.215 | Relatively Low |
| 210 | 220841    | 2,6-Dimethylnaphthalene             | -5.438 | -5.921 | Relatively Low |
| 211 | 6476139   | methyl chlorogenate                 | -5.431 | -6.978 | Relatively Low |
| 212 | 443024    | Acanthoside B                       | -5.422 | -6.543 | Relatively Low |
| 213 | 439612    | Secologanate                        | -5.431 | -6.239 | Relatively Low |
| 214 | 480799    | glyinflanin A                       | -6.137 | -6.768 | Relatively Low |
| 215 | 102177109 | 4,5-Dicaffeoylquinic acid           | -5.413 | -5.873 | Relatively Low |
| 216 | 11596309  | glabrol                             | -5.409 | -7.556 | Relatively Low |
| 217 | 124050    | Isoglycyrol                         | -5.402 | -5.797 | Relatively Low |
| 218 | 445929    | D-Galacturonic acid,<br>homopolymer | -5.387 | -5.574 | Relatively Low |
| 219 | 244       | WLN: QIR                            | -5.385 | -5.85  | Relatively Low |
| 220 | 162868    | Secoxyloganin                       | -5.373 | -5.618 | Relatively Low |
| 221 | 5271991   | Ganhuangenin                        | -5.404 | -6.101 | Relatively Low |
| 222 | 53462251  | uralenneoside                       | -5.385 | -7.463 | Relatively Low |
| 223 | 44257530  | Phaseol                             | -5.373 | -6.541 | Relatively Low |
| 224 | 133867    | Liconeolignan                       | -5.392 | -6.523 | Relatively Low |
| 225 | 13892717  | Adoxosidic acid                     | -5.366 | -5.291 | Relatively Low |
| 226 | 5318998   | licochalcone a                      | -5.412 | -7.928 | Relatively Low |
| 227 | 5317777   | Glyzaglabrin                        | -5.346 | -6.836 | Relatively Low |
| 228 | 5281702   | tricin                              | -5.365 | -5.896 | Relatively Low |
| 229 | 5988      | glyasperins D                       | -5.324 | -6.301 | Relatively Low |
| 230 | 5280378   | formononetin                        | -5.327 | -6.519 | Relatively Low |
| 231 | 14136854  | secologanoside                      | -5.335 | -5.065 | Relatively Low |

|     |          |                       |        |        |                |
|-----|----------|-----------------------|--------|--------|----------------|
|     |          | 7-methylester_qt      |        |        |                |
| 232 | 54717187 | 1,1,6-trimethyl-2H-   | -5.317 | -7.599 | Relatively Low |
| 233 | 12166    | naphthalene           | -5.314 | -4.973 | Relatively Low |
| 234 | 8447     | p-Nitrosotoluene      | -5.311 | -6.624 | Relatively Low |
| 235 | 5281677  | Usaf cs-6             | -5.306 | -6.141 | Relatively Low |
| 236 | 10774324 | pachypodol            | -5.293 | -4.135 | Relatively Low |
| 237 | 139041   | suspenolic acid       | -5.29  | -5.788 | Relatively Low |
| 238 | 442811   | phenanthrone          | -5.28  | -6.426 | Relatively Low |
| 239 | 5316952  | Mucronulatol          | -5.281 | -4.135 | Relatively Low |
| 240 | 29408    | Docosyl caffeate      | -5.275 | -4.856 | Relatively Low |
| 241 | 5742590  | patchoulane           | -5.274 | -4.571 | Relatively Low |
| 242 | 44593449 | Sitogluside           | -5.269 | -7.703 | Relatively Low |
| 243 | 5281607  | 5,7,4'-trihydroxy-6-  | -5.309 | -7.143 | Relatively Low |
| 244 | 15840593 | methoxyflavanone      | -5.259 | -5.691 | Relatively Low |
| 245 | 64782    | chrysin               | -5.336 | -6.275 | Relatively Low |
| 246 | 122851   | Licoagrocarpin        | -5.247 | -6.509 | Relatively Low |
| 247 | 185617   | Tybraine              | -5.245 | -7.187 | Relatively Low |
| 248 | 4978     | licopyranocoumarin    | -5.426 | -7.974 | Relatively Low |
| 249 | 65575    | scutellarein          | -5.216 | -5.171 | Relatively Low |
| 250 | 480873   | Psuedohypericin       | -5.214 | -6.776 | Relatively Low |
| 251 | 5316802  | Cedrol                | -5.351 | -7.136 | Relatively Low |
| 252 | 22135564 | 1-Methoxyphaseollidin | -5.207 | -6.196 | Relatively Low |
| 253 | 938      | Kanzonol E            | -5.214 | -5.264 | Relatively Low |
| 254 | 5317479  | OXA                   | -5.214 | -6.125 | Relatively Low |
| 255 | 15559328 | nicotinic acid        | -5.214 | -5.718 | Relatively Low |
| 256 | 690730   | Gancaonin B           | -5.202 | -6.019 | Relatively Low |

|     |          |                                  |        |        |                |
|-----|----------|----------------------------------|--------|--------|----------------|
| 257 | 37517    | forsythide                       | -5.2   | -6.732 | Relatively Low |
| 258 | 11468    | 1Ph5SHTetrazol                   | -5.2   | -5.692 | Relatively Low |
| 259 | 147394   | LFA                              | -5.199 | -5.587 | Relatively Low |
| 260 | 5320291  | 1-terpineol                      | -5.497 | -6.53  | Relatively Low |
| 261 | 161276   | Eriodictiol-7-glucoside          | -5.187 | -5.975 | Relatively Low |
| 262 | 10725564 | Onjixanthone I                   | -5.181 | -5.758 | Relatively Low |
| 263 | 637796   | secologanin<br>dimethylacetal_qt | -5.179 | -5.855 | Relatively Low |
| 264 | 165536   | rengyolone                       | -5.175 | -4.742 | Relatively Low |
| 265 | 11363    | Isosafrole                       | -5.174 | -5.752 | Relatively Low |
| 266 | 91457    | Aristolone                       | -5.172 | -6.024 | Relatively Low |
| 267 | 188308   | Pyruvophenone                    | -5.193 | -8.331 | Relatively Low |
| 268 | 5281671  | beta-Eudesmol                    | -5.164 | -6.987 | Relatively Low |
| 269 | 5318679  | Carthamidin                      | -5.185 | -6.444 | Relatively Low |
| 270 | 31493    | Morusin                          | -5.159 | -5.408 | Relatively Low |
| 271 | 480774   | Isotrifoliol                     | -5.157 | -7.197 | Relatively Low |
| 272 | 3845     | m-Ethylacetophenone              | -5.15  | -5.821 | Relatively Low |
| 273 | 182259   | Glabrene                         | -5.149 | -7.156 | Relatively Low |
| 274 | 5281605  | KYNA                             | -5.199 | -7.228 | Relatively Low |
| 275 | 108770   | Vestitol                         | -5.145 | -6.528 | Relatively Low |
| 276 | 6428458  | baicalein                        | -5.143 | -5.486 | Relatively Low |
| 277 | 23724664 | ST069309                         | -5.142 | -5.474 | Relatively Low |
| 278 | 68071    | Methyl (Z)-cinnamate             | -5.157 | -7.991 | Relatively Low |
| 279 | 5316733  | (-)-Medicocarpin                 | -5.152 | -6.926 | Relatively Low |
| 280 | 5317768  | Pinocembrin                      | -5.133 | -6.41  | Relatively Low |
| 281 | 5144     | dihydrooroxylin A                | -5.128 | -5.526 | Relatively Low |

|     |           |                            |        |        |                |
|-----|-----------|----------------------------|--------|--------|----------------|
| 282 | 5281691   | Glypallichalcone           | -5.12  | -7.325 | Relatively Low |
| 283 | 10787     | Safrol                     | -5.106 | -6.457 | Relatively Low |
| 284 | 10223     | Rhamnetin                  | -5.106 | -6.097 | Relatively Low |
| 285 | 15380912  | WLN: QR BQ DQ              | -5.108 | -6.376 | Relatively Low |
| 286 | 10721     | delta-amorphene            | -5.103 | -4.869 | Relatively Low |
| 287 | 73399     | Kanzonol F                 | -5.096 | -5.28  | Relatively Low |
| 288 | 446578    | WLN: NCR B1                | -5.095 | -6.048 | Relatively Low |
| 289 | 392443    | Pinoresinol                | -5.149 | -6.655 | Relatively Low |
| 290 | 73352581  | Fucopyranose, L-           | -5.085 | -6.451 | Relatively Low |
| 291 | 93009     | licoisoflavanone           | -5.082 | -4.57  | Relatively Low |
| 292 | 188316    | Xambioona                  | -5.076 | -7.213 | Relatively Low |
| 293 | 5481948   | L-Bornyl acetate           | -5.094 | -7.203 | Relatively Low |
| 294 | 171335    | Moslosooflavone            | -5.258 | -7.007 | Relatively Low |
| 295 | 135465089 | Semilicoisoflavone B       | -5.15  | -5.042 | Relatively Low |
| 296 | 7059596   | Protopseudohypericin       | -5.152 | -5.507 | Relatively Low |
| 297 | 11455     | DFA                        | -5.059 | -5.181 | Relatively Low |
| 298 | 5281804   | ()-N-Methylpseudoephedrine | -5.058 | -6.875 | Relatively Low |
| 299 | 101297655 | m-Methylacetophenone       | -5.057 | -5.119 | Relatively Low |
| 300 | 440752    | Prunetin                   | -5.052 | -5.943 | Relatively Low |
| 301 | 326       | Matatabiether              | -5.037 | -4.751 | Relatively Low |
| 302 | 520957    | 6-Hydroxykynurenate        | -5.036 | -5.353 | Relatively Low |
| 303 | 785       | cuminal                    | -5.027 | -6.193 | Relatively Low |
| 304 | 6442675   | longipinene                | -5.095 | -7.728 | Relatively Low |
| 305 | 5481234   | hydroquinone               | -5.048 | -6.394 | Relatively Low |
| 306 | 161271    | echinatin                  | -5.021 | -5.727 | Relatively Low |
| 307 | 11229486  | Licoisoflavone B           | -5.019 | -4.809 | Relatively Low |

|     |          |                                  |        |        |                |
|-----|----------|----------------------------------|--------|--------|----------------|
| 308 | 5319013  | Salvigenin                       | -5.024 | -6.017 | Relatively Low |
| 309 | 7929     | CLOVENE                          | -5.015 | -4.973 | Relatively Low |
| 310 | 5320118  | Licoricone                       | -5.02  | -7.037 | Relatively Low |
| 311 | 89640    | m-xylene                         | -5.025 | -5.703 | Relatively Low |
| 312 | 5318619  | Neouralenol                      | -5.006 | -5.767 | Relatively Low |
| 313 | 10363    | loganic                          | -5.001 | -5.964 | Relatively Low |
| 314 | 5481224  | Isoononin                        | -5.026 | -8.44  | Relatively Low |
| 315 | 49856081 | carvenone                        | -5.252 | -8.066 | Relatively Low |
| 316 | 10237    | Guajavarin                       | -5.153 | -6.628 | Relatively Low |
| 317 | 198186   | licochalcone G                   | -5.139 | -5.423 | Relatively Low |
| 318 | 15689652 | bicuculline                      | -4.961 | -6.8   | Relatively Low |
| 319 | 122635   | 2,5-Dimethylpyrazole             | -4.97  | -6.968 | Relatively Low |
| 320 | 6602508  | 7-O-methylisomucronulatol        | -4.951 | -4.642 | Relatively Low |
| 321 | 5281703  | Emodinanthrone                   | -4.985 | -7.216 | Relatively Low |
| 322 | 75818    | stigmasterol- $\beta$ -glucoside | -4.969 | -5.424 | Relatively Low |
| 323 | 638278   | wogonin                          | -5.223 | -8.363 | Relatively Low |
| 324 | 14655552 | Methylbenzylamine                | -4.939 | -6.076 | Relatively Low |
| 325 | 7013     | isoliquiritigenin                | -4.933 | -7.334 | Relatively Low |
| 326 | 69453    | oroxylin a                       | -4.922 | -5.652 | Relatively Low |
| 327 | 636883   | PANA                             | -4.921 | -6.377 | Relatively Low |
| 328 | 65373    | BZQ                              | -4.918 | -6.14  | Relatively Low |
| 329 | 2797     | Licoagroisoflavone               | -4.913 | -4.809 | Relatively Low |
| 330 | 5281704  | Secoisolariciresinol             | -4.918 | -5.868 | Relatively Low |
| 331 | 5281522  | isobutyric acid                  | -4.905 | -4.445 | Relatively Low |
| 332 | 5322111  | Castanin                         | -4.905 | -5.099 | Relatively Low |
| 333 | 21722915 | Isocaryophyllene                 | -4.894 | -5.264 | Relatively Low |



|     |           |                                       |        |        |                |
|-----|-----------|---------------------------------------|--------|--------|----------------|
| 334 | 14632193  | (Z)-caryophyllene                     | -4.967 | -6.984 | Relatively Low |
| 335 | 139291297 | (+)-pinosresinol                      | -4.889 | -6.093 | Relatively Low |
| 336 | 88301     | monomethyl ether<br>4,2',4',          | -4.887 | -4.926 | Relatively Low |
| 337 | 164660    | alpha-Tetrahydroxydihydroc<br>halcone | -5.054 | -6.261 | Relatively Low |
| 338 | 5320438   | 4-stearylmorpholine                   | -4.904 | -6.18  | Relatively Low |
| 339 | 8433      | 19894-97-4                            | -5.146 | -6.074 | Relatively Low |
| 340 | 5280442   | Protohypericin                        | -4.901 | -6.58  | Relatively Low |
| 341 | 91354     | Pectolinarigenin                      | -4.861 | -4.969 | Relatively Low |
| 342 | 363707    | Karenzu DK2                           | -4.861 | -5.234 | Relatively Low |
| 343 | 13965473  | acacetin                              | -4.866 | -6.042 | Relatively Low |
| 344 | 6989      | alloaromadrene                        | -4.856 | -5.942 | Relatively Low |
| 345 | 50515     | rengyol                               | -4.88  | -6.726 | Relatively Low |
| 346 | 7469      | Odoratin                              | -4.884 | -5.94  | Relatively Low |
| 347 | 124052    | thymol                                | -4.848 | -6.603 | Relatively Low |
| 348 | 160876    | FA                                    | -4.844 | -5.692 | Relatively Low |
| 349 | 192490    | Piceol                                | -4.843 | -6.295 | Relatively Low |
| 350 | 12303902  | Glabridin                             | -4.838 | -5.494 | Relatively Low |
| 351 | 5317652   | epiberberine                          | -4.845 | -6.522 | Relatively Low |
| 352 | 58160     | Uralene                               | -4.835 | -6.656 | Relatively Low |
| 353 | 736186    | copaene                               | -4.826 | -4.909 | Relatively Low |
| 354 | 1140      | Glabrone                              | -4.825 | -4.819 | Relatively Low |
| 355 | 23991884  | Cyclobutanol, 1-ethyl-                | -4.824 | -6.246 | Relatively Low |
| 356 | 373261    | isoferulic acid                       | -4.839 | -6.411 | Relatively Low |
| 357 | 6428995   | toluene                               | -4.816 | -4.874 | Relatively Low |

|     |          |                                               |        |        |                |
|-----|----------|-----------------------------------------------|--------|--------|----------------|
| 358 | 439710   | 7-Methoxy-2-methyl<br>isoflavone              | -4.813 | -5.954 | Relatively Low |
| 359 | 14896    | Eriodyctiol (flavanone)                       | -4.81  | -5.511 | Relatively Low |
| 360 | 192240   | cis-Cinnamaldehyde                            | -4.811 | -5.394 | Relatively Low |
| 361 | 10150    | RAM                                           | -4.896 | -6.366 | Relatively Low |
| 362 | 480780   | (-)-nopinene                                  | -4.802 | -5.912 | Relatively Low |
| 363 | 5281617  | darendoside B                                 | -4.797 | -6.3   | Relatively Low |
| 364 | 5281520  | 2,6,2',4'-tetrahydroxy-6'-met<br>hoxychaleone | -4.792 | -5.159 | Relatively Low |
| 365 | 101731   | Gancaonin G                                   | -4.787 | -4.64  | Relatively Low |
| 366 | 493570   | Genkwanin                                     | -4.782 | -6.645 | Relatively Low |
| 367 | 926139   | alpha-humulene                                | -4.763 | -6.057 | Relatively Low |
| 368 | 13297    | $\beta$ -patchoulene                          | -4.761 | -6.502 | Relatively Low |
| 369 | 12594    | Flavaxin                                      | -4.76  | -5.064 | Relatively Low |
| 370 | 6024     | FMT                                           | -4.759 | -5.884 | Relatively Low |
| 371 | 86609    | PEL                                           | -4.758 | -5.688 | Relatively Low |
| 372 | 10364    | 3 $\beta$ -formylglabrolide                   | -4.752 | -5.695 | Relatively Low |
| 373 | 90479675 | OCT                                           | -4.752 | -4.069 | Relatively Low |
| 374 | 15228662 | alpha-Cubebene                                | -4.743 | -6.238 | Relatively Low |
| 375 | 92762    | o-Thymol                                      | -4.738 | -5.031 | Relatively Low |
| 376 | 1274465  | glabrolide                                    | -5.065 | -5.756 | Relatively Low |
| 377 | 480854   | 3'-Hydroxy-4'-O-Methylglab<br>ridin           | -4.749 | -6.163 | Relatively Low |
| 378 | 3749     | alpha-Eudesmol                                | -4.72  | -6.111 | Relatively Low |
| 379 | 13889022 | Scopine                                       | -4.71  | -5.507 | Relatively Low |
| 380 | 7410     | 3-Hydroxyglabrol                              | -4.706 | -5.134 | Relatively Low |

|     |           |                          |        |        |                |
|-----|-----------|--------------------------|--------|--------|----------------|
| 381 | 259846    | NON                      | -4.699 | -3.655 | Relatively Low |
| 382 | 336327    | rivularin                | -4.686 | -6.064 | Relatively Low |
| 383 | 5370646   | Hypnon                   | -4.677 | -5.795 | Relatively Low |
| 384 | 6949      | lupeol                   | -4.675 | -4.983 | Relatively Low |
| 385 | 5320399   | Medicarpin               | -4.672 | -7.749 | Relatively Low |
| 386 | 3663      | Methylbenzylideneacetone | -4.854 | -8.021 | Relatively Low |
| 387 | 159278    | guaiene                  | -4.666 | -6.819 | Relatively Low |
| 388 | 5959      | Panicolin                | -4.665 | -6.175 | Relatively Low |
| 389 | 6445180   | hypericin                | -4.684 | -6.481 | Relatively Low |
| 390 | 1110      | salidroside              | -4.66  | -3.869 | Relatively Low |
| 391 | 64685     | CAM                      | -4.644 | -5.926 | Relatively Low |
| 392 | 1548883   | 2-methyl-6-ethyl decane  | -4.643 | -4.705 | Relatively Low |
| 393 | 5281781   | succinic acid            | -4.664 | -5.75  | Relatively Low |
| 394 | 480872    | Heptan                   | -4.634 | -6.912 | Relatively Low |
| 395 | 528708    | FERULIC ACID (CIS)       | -4.628 | -6.296 | Relatively Low |
| 396 | 189685    | irisolidone              | -4.658 | -5.472 | Relatively Low |
| 397 | 136419    | 1-Methoxyficifolinol     | -4.621 | -6.42  | Relatively Low |
| 398 | 7150      | calacorene               | -4.62  | -5.529 | Relatively Low |
| 399 | 24055     | EGENINE                  | -4.619 | -5.16  | Relatively Low |
| 400 | 135502249 | Daidzein dimethyl ether  | -5.113 | -6.775 | Relatively Low |
| 401 | 11902     | Clorius                  | -4.612 | -5.354 | Relatively Low |
| 402 | 10219606  | 2-Methyl-1-naphthol      | -4.603 | -5.711 | Relatively Low |
| 403 | 3515      | EB                       | -4.603 | -6.534 | Relatively Low |
| 404 | 798       | WLN: T5OJ BVO1           | -4.599 | -6.199 | Relatively Low |
| 405 | 519743    | (2S)-heptane-1,2-diol    | -4.588 | -4.553 | Relatively Low |
| 406 | 14704550  | Azulol                   | -4.585 | -6.674 | Relatively Low |

|     |           |                                                |        |        |                |
|-----|-----------|------------------------------------------------|--------|--------|----------------|
| 407 | 6047      | indole                                         | -4.572 | -4.94  | Relatively Low |
| 408 | 638014    | seychellene                                    | -4.572 | -5.397 | Relatively Low |
| 409 | 10847444  | rhamnocitrin-3-O-glucoside                     | -4.569 | -5.373 | Relatively Low |
| 410 | 7095      | kanzonols L                                    | -4.565 | -5.622 | Relatively Low |
| 411 | 5319439   | Trans-ionone                                   | -4.563 | -6.436 | Relatively Low |
| 412 | 93081     | (2S,5R)-2-isopropenyl-5-methyl-1-cyclohexanone | -4.556 | -4.803 | Relatively Low |
| 413 | 7362      | BNL                                            | -4.556 | -5     | Relatively Low |
| 414 | 8554      | 3'-Methoxyglabridin                            | -4.541 | -4.801 | Relatively Low |
| 415 | 65041     | beta-Cubebene                                  | -4.535 | -5.108 | Relatively Low |
| 416 | 23677976  | Furofuran                                      | -4.535 | -5.108 | Relatively Low |
| 417 | 5281674   | Mipax                                          | -6.078 | -7.095 | Relatively Low |
| 418 | 124211    | DL-Glucuronic acid                             | -4.526 | -5.033 | Relatively Low |
| 419 | 443023    | glucuronic acid                                | -4.524 | -5.505 | Relatively Low |
| 420 | 127       | Norwogonin                                     | -4.511 | -5.547 | Relatively Low |
| 421 | 79028     | Skullcapflavone II                             | -4.51  | -5.61  | Relatively Low |
| 422 | 7967      | (+)-Syringaresinol                             | -4.509 | -5.036 | Relatively Low |
| 423 | 5281600   | 4-Carboxymethylphenol                          | -4.632 | -7.081 | Relatively Low |
| 424 | 31404     | Heptan                                         | -4.503 | -5.727 | Relatively Low |
| 425 | 30248     | CYH                                            | -4.499 | -5.126 | Relatively Low |
| 426 | 5283468   | Amentoflavone                                  | -4.493 | -5.387 | Relatively Low |
| 427 | 92158     | butylated hydroxytoluene                       | -4.489 | -3.415 | Relatively Low |
| 428 | 325       | l-Carvyl acetate                               | -4.487 | -5.858 | Relatively Low |
| 429 | 94275     | HMO                                            | -4.485 | -5.545 | Relatively Low |
| 430 | 129794163 | LUPENONE                                       | -4.488 | -5.466 | Relatively Low |
| 431 | 637857    | Cuminol                                        | -4.482 | -5.753 | Relatively Low |

|     |          |                                      |        |        |                |
|-----|----------|--------------------------------------|--------|--------|----------------|
| 432 | 85567    | 3691-11-0                            | -4.479 | -5.62  | Relatively Low |
| 433 | 14466553 | 7-hydroxy-2-methyl-3-phenyl-chromone | -4.466 | -5.819 | Relatively Low |
| 434 | 91510    | Loniceracetalide A                   | -4.462 | -6.012 | Relatively Low |
| 435 | 348154   | cis-Piperitol                        | -4.454 | -5.423 | Relatively Low |
| 436 | 521710   | XYLOSTOSIDINE                        | -4.437 | -4.67  | Relatively Low |
| 437 | 90351    | Inermine                             | -4.435 | -4.442 | Relatively Low |
| 438 | 15559941 | HYKOP                                | -4.431 | -4.403 | Relatively Low |
| 439 | 439263   | $\alpha$ -patchoulene                | -4.429 | -5.555 | Relatively Low |
| 440 | 1549106  | Acoradiene                           | -4.428 | -4.838 | Relatively Low |
| 441 | 6436722  | isoglabrolide                        | -4.422 | -6.031 | Relatively Low |
| 442 | 10494    | (-)-Neomenthol                       | -4.425 | -4.451 | Relatively Low |
| 443 | 6321405  | cis-p-Coumarate                      | -4.412 | -5.926 | Relatively Low |
| 444 | 73659    | phytofluene                          | -4.411 | -3.716 | Relatively Low |
| 445 | 107801   | oleanolic acid                       | -4.404 | -4.311 | Relatively Low |
| 446 | 11467    | (+/-)-Isoborneol                     | -4.387 | -5.909 | Relatively Low |
| 447 | 638072   | Maslinic acid                        | -4.387 | -5.732 | Relatively Low |
| 448 | 6544     | PHB                                  | -4.386 | -5.904 | Relatively Low |
| 449 | 11197    | gamma-Terpineol                      | -4.389 | -3.941 | Relatively Low |
| 450 | 3084311  | Supraene                             | -4.383 | -5.7   | Relatively Low |
| 451 | 689075   | Izoforon                             | -4.447 | -5.003 | Relatively Low |
| 452 | 72321    | lignoceric acid                      | -4.376 | -7.437 | Relatively Low |
| 453 | 581460   | $\delta$ -cadinol                    | -4.374 | -5.117 | Relatively Low |
| 454 | 247      | Methyl caffeate                      | -4.364 | -4.553 | Relatively Low |
| 455 | 637542   | coptisine                            | -4.363 | -3.889 | Relatively Low |
| 456 | 998      | Isothiazole, trimethyl-              | -4.359 | -5.694 | Relatively Low |

|     |          |                                          |        |        |                |
|-----|----------|------------------------------------------|--------|--------|----------------|
| 457 | 6431015  | betaine                                  | -4.355 | -3.706 | Relatively Low |
| 458 | 92874    | p-coumaric acid                          | -4.34  | -5.354 | Relatively Low |
| 459 | 160767   | Hyacinthin                               | -4.331 | -6.565 | Relatively Low |
| 460 | 519382   | (-)-alpha-cedrene                        | -4.32  | -4.996 | Relatively Low |
| 461 | 5481949  | l-Verbenone                              | -4.329 | -5.368 | Relatively Low |
| 462 | 54715116 | isoflavanone                             | -5.135 | -6.352 | Relatively Low |
| 463 | 237332   | Dihydro-beta-ionone                      | -4.305 | -4.884 | Relatively Low |
| 464 | 6432469  | Gancaonin H                              | -4.305 | -5.42  | Relatively Low |
| 465 | 9895     | 3,7-dimethyl-cyclopenta<br>cyclooctene   | -4.303 | -5.499 | Relatively Low |
| 466 | 145742   | HMF                                      | -4.301 | -5.256 | Relatively Low |
| 467 | 44715835 | (-)-isomenthone                          | -4.298 | -7.428 | Relatively Low |
| 468 | 439250   | beta-Cyclocitral                         | -4.29  | -5.026 | Relatively Low |
| 469 | 91753455 | Prolinum                                 | -4.279 | -4.884 | Relatively Low |
| 470 | 5481962  | darendoside B qt                         | -4.279 | -6.41  | Relatively Low |
| 471 | 61041    | L-Limonen                                | -4.278 | -5.259 | Relatively Low |
| 472 | 7501     | Aromadendrene oxide 2                    | -4.265 | -5.311 | Relatively Low |
| 473 | 442774   | Artonin E                                | -4.265 | -6.34  | Relatively Low |
| 474 | 14189465 | Safranal                                 | -4.264 | -4     | Relatively Low |
| 475 | 107526   | styrene                                  | -4.259 | -5.144 | Relatively Low |
| 476 | 565709   | Hispaglabridin B                         | -4.257 | -5.777 | Relatively Low |
| 477 | 54695756 | 18 $\alpha$ -hydroxyglycyrrhetic<br>acid | -4.254 | -5.032 | Relatively Low |
| 478 | 3084282  | GLO                                      | -4.249 | -3.351 | Relatively Low |
| 479 | 12306047 | Aciphyllene                              | -4.24  | -5.606 | Relatively Low |
| 480 | 62566    | DHELWANGIN                               | -4.24  | -5.308 | Relatively Low |

|     |           |                                         |        |        |                |
|-----|-----------|-----------------------------------------|--------|--------|----------------|
| 481 | 227829    | Myricadiol                              | -4.239 | -5.882 | Relatively Low |
| 482 | 556516    | muurolene                               | -4.234 | -5.742 | Relatively Low |
| 483 | 15560276  | beta-Bourbonene                         | -4.225 | -4.967 | Relatively Low |
| 484 | 11230     | Guaiol                                  | -4.222 | -5.563 | Relatively Low |
| 485 | 8655      | 2-Caren-10-al                           | -4.303 | -6.071 | Relatively Low |
| 486 | 21648     | $\alpha$ -gurjunene                     | -4.209 | -5.142 | Relatively Low |
| 487 | 11463     | ()-Terpinen-4-ol                        | -4.207 | -5.632 | Relatively Low |
| 488 | 101273201 | Syringaldehyde                          | -4.347 | -6.229 | Relatively Low |
| 489 | 16666     | Rheosmin                                | -4.206 | -5.316 | Relatively Low |
| 490 | 5374041   | Tereben                                 | -4.204 | -5.448 | Relatively Low |
| 491 | 196831    | 2,3,4-Trimethyl-5-phenyloxa<br>zolidine | -4.199 | -5.581 | Relatively Low |
| 492 | 108213    | MENTHOL                                 | -4.194 | -5.481 | Relatively Low |
| 493 | 8575      | cinerolon                               | -4.192 | -5.262 | Relatively Low |
| 494 | 102007321 | Licoriisoflavan A                       | -4.184 | -5.478 | Relatively Low |
| 495 | 12313020  | Bifendate                               | -4.18  | -4.507 | Relatively Low |
| 496 | 442393    | MBP                                     | -4.18  | -4.842 | Relatively Low |
| 497 | 203797    | 2,6,10-trimethyl-dodecane               | -4.178 | -5.54  | Relatively Low |
| 498 | 2879      | $\gamma$ -muurolene                     | -4.174 | -6.02  | Relatively Low |
| 499 | 2345      | beta-Selinene                           | -4.17  | -6.109 | Relatively Low |
| 500 | 79812     | Sweroside aglycone                      | -4.157 | -4.674 | Relatively Low |
| 501 | 178323    | PCR                                     | -4.153 | -5.31  | Relatively Low |
| 502 | 480863    | BZM                                     | -4.152 | -6.291 | Relatively Low |
| 503 | 47124     | WLN: VHR                                | -4.147 | -6.15  | Relatively Low |
| 504 | 68313     | 136458-42-9                             | -4.146 | -5.869 | Relatively Low |
| 505 | 3083590   | Kanzonol H                              | -4.147 | -6.3   | Relatively Low |

|     |          |                                    |        |        |                |
|-----|----------|------------------------------------|--------|--------|----------------|
| 506 | 91747494 | 2-methyl-5-propyl -nonane          | -4.141 | -5.136 | Relatively Low |
| 507 | 381152   | Hordenine                          | -4.134 | -5.631 | Relatively Low |
| 508 | 61362    | (-)-Phillygenin                    | -4.13  | -5.335 | Relatively Low |
| 509 | 5281515  | Campherenol                        | -4.121 | -5.251 | Relatively Low |
| 510 | 7302     | Piperitenone                       | -4.12  | -4.937 | Relatively Low |
| 511 | 6267     | d-Piperitone                       | -4.116 | -4.503 | Relatively Low |
| 512 | 1742210  | beta-caryophyllene                 | -4.103 | -5.361 | Relatively Low |
| 513 | 442495   | GBL                                | -4.092 | -5.961 | Relatively Low |
| 514 | 176      | Crystal VI                         | -4.093 | -3.898 | Relatively Low |
| 515 | 13258    | (-)-Epoxyaryophyllene              | -4.083 | -6.326 | Relatively Low |
| 516 | 10114    | Pulegone                           | -4.08  | -3.337 | Relatively Low |
| 517 | 5280794  | acetic acid                        | -4.069 | -5.09  | Relatively Low |
| 518 | 159055   | 3-METHYLPHENANTHRE<br>NE           | -4.067 | -5.082 | Relatively Low |
| 519 | 7463     | 18beta-glycyrrhetic acid           | -4.061 | -5.589 | Relatively Low |
| 520 | 637894   | Stigmasterol                       | -4.058 | -5.07  | Relatively Low |
| 521 | 5317844  | (S)-camphor                        | -4.054 | -5.273 | Relatively Low |
| 522 | 6209     | Cymol                              | -4.049 | -4.884 | Relatively Low |
| 523 | 8766     | (R)-(-)-3-Methylcyclopentano<br>ne | -4.049 | -5.201 | Relatively Low |
| 524 | 82755    | alpha-Guaiene                      | -4.039 | -5.433 | Relatively Low |
| 525 | 6436598  | choline                            | -4.032 | -3.687 | Relatively Low |
| 526 | 3362     | WLN: RSR                           | -4.465 | -5.695 | Relatively Low |
| 527 | 7127     | hydroxytyrosol                     | -4.021 | -4.769 | Relatively Low |
| 528 | 1201518  | 22β-acetylglabric acid             | -4.015 | -5.269 | Relatively Low |
| 529 | 161171   | Labroda                            | -4.01  | -5.626 | Relatively Low |



|     |          |                            |        |        |                |
|-----|----------|----------------------------|--------|--------|----------------|
| 530 | 22955476 | Methyleugenol              | -4.003 | -5.048 | Relatively Low |
| 531 | 5280581  | [(1S)-endo]-(-)-Borneol    | -3.999 | -4.212 | Relatively Low |
| 532 | 7909     | Ephedroxane                | -3.992 | -5.15  | Relatively Low |
| 533 | 15596633 | 3,3-Dimethylpentane        | -3.977 | -5.121 | Relatively Low |
| 534 | 5281862  | glyasperins Z              | -3.973 | -5.564 | Relatively Low |
| 535 | 24135    | MIK                        | -4.714 | -4.77  | Relatively Low |
| 536 | 94741    | 24-Ethylcholest-4-en-3-one | -3.957 | -3.593 | Relatively Low |
| 537 | 11265    | Urushiol III               | -3.944 | -5.058 | Relatively Low |
| 538 | 70962    | Desaspidinol-A             | -3.943 | -5.26  | Relatively Low |
| 539 | 439570   | Hentriacontan              | -3.94  | -4.41  | Relatively Low |
| 540 | 7461     | 2-Methylpentan-3-one       | -3.937 | -5.604 | Relatively Low |
| 541 | 442402   | d-isomenthone              | -3.932 | -4.59  | Relatively Low |
| 542 | 7892     | l-carvone                  | -3.923 | -4.894 | Relatively Low |
| 543 | 7809     | Moslene                    | -3.922 | -4.954 | Relatively Low |
| 544 | 444539   | widdrene                   | -3.918 | -4.182 | Relatively Low |
| 545 | 26447    | Isohexane                  | -3.916 | -5.687 | Relatively Low |
| 546 | 6428535  | p-xylene                   | -3.911 | -4.46  | Relatively Low |
| 547 | 7462     | cinnamic acid              | -3.904 | -5.609 | Relatively Low |
| 548 | 570597   | l-Menthone                 | -3.893 | -5.517 | Relatively Low |
| 549 | 75546    | 53111-25-4                 | -3.883 | -3.959 | Relatively Low |
| 550 | 3314     | Terpilene                  | -3.881 | -4.567 | Relatively Low |
| 551 | 995      | 2,3-dimethyl-1-pentene     | -3.876 | -6.44  | Relatively Low |
| 552 | 12302132 | Methyl lignocerate         | -3.874 | -5.07  | Relatively Low |
| 553 | 11095734 | eugenol                    | -3.87  | -4.957 | Relatively Low |
| 554 | 91472    | PEY                        | -3.866 | -3.658 | Relatively Low |
| 555 | 6427358  | $\beta$ -bulnesene         | -3.865 | -4.296 | Relatively Low |

|     |           |                                          |        |        |                |
|-----|-----------|------------------------------------------|--------|--------|----------------|
| 556 | 94334     | ()-Aromadendrene                         | -3.862 | -4.922 | Relatively Low |
| 557 | 3018525   | Friedelin                                | -3.858 | -5.009 | Relatively Low |
| 558 | 101031952 | [(2S)-6-methylhept-5-en-2-yl]<br>acetate | -3.844 | -5.548 | Relatively Low |
| 559 | 14529     | 6892-80-4                                | -3.842 | -5.775 | Relatively Low |
| 560 | 6918391   | PHYTANTRIOL                              | -3.841 | -4.627 | Relatively Low |
| 561 | 22227     | 2-ethylidene-1,1-dimethyl-cyclopentane   | -3.837 | -4.721 | Relatively Low |
| 562 | 144514377 | p-Cymen-8-ol                             | -3.834 | -5.71  | Relatively Low |
| 563 | 173183    | beta-elemene                             | -3.831 | -3.829 | Relatively Low |
| 564 | 6654      | d-Dihydrocarvone                         | -3.827 | -5.361 | Relatively Low |
| 565 | 22048     | 3-methylhexa-2,4-diene                   | -3.805 | -3.917 | Relatively Low |
| 566 | 1796220   | campest-5-en-3beta-ol                    | -3.797 | -4.856 | Relatively Low |
| 567 | 87771     | (-)-alpha-Pinene                         | -3.796 | -3.99  | Relatively Low |
| 568 | 66841     | METHYL<br>HEXACOSANOATE                  | -3.792 | -5.216 | Relatively Low |
| 569 | 138980964 | junipene                                 | -3.779 | -5.6   | Relatively Low |
| 570 | 119       | Trichloroicosylsilane                    | -3.773 | -4.693 | Relatively Low |
| 571 | 15653     | beta-Terpinene                           | -3.77  | -5.801 | Relatively Low |
| 572 | 10104370  | (5S)-3,5-dimethylcyclohex-2-en-1-one     | -3.76  | -4.647 | Relatively Low |
| 573 | 70719     | gamma-aminobutyric acid                  | -3.993 | -5.626 | Relatively Low |
| 574 | 637563    | 2-Ethyl-p-xylene                         | -3.752 | -4.597 | Relatively Low |
| 575 | 9963735   | beta-Bisabolene                          | -3.745 | -6.261 | Relatively Low |
| 576 | 15801231  | 3-Hydroxy-2-picoline                     | -3.741 | -4.532 | Relatively Low |
| 577 | 12310283  | anethole                                 | -3.736 | -5.253 | Relatively Low |

|     |           |                                  |        |        |                |
|-----|-----------|----------------------------------|--------|--------|----------------|
| 578 | 528127    | adhyperforin                     | -3.736 | -4.923 | Relatively Low |
| 579 | 688210    | 1,8-cineole                      | -3.734 | -5.35  | Relatively Low |
| 580 | 119242    | glycyrrhetol                     | -3.732 | -5.004 | Relatively Low |
| 581 | 6560      | 2,3-DIMETHYLPYRAZINE             | -3.725 | -4.82  | Relatively Low |
| 582 | 5319562   | BOX                              | -3.778 | -5.123 | Relatively Low |
| 583 | 7047      | 16844-71-6                       | -3.724 | -5.142 | Relatively Low |
| 584 | 81722     | iso-Baurenylacetate              | -3.711 | -4.885 | Relatively Low |
| 585 | 110898    | Methyl-p-coumarate               | -3.709 | -3.948 | Relatively Low |
| 586 | 68057     | Leukol                           | -3.688 | -6.104 | Relatively Low |
| 587 | 92221     | delta-Terpineol                  | -3.684 | -5.275 | Relatively Low |
| 588 | 10955174  | 2-isopropenyl-5-methylhex-4-enal | -3.669 | -4.208 | Relatively Low |
| 589 | 441298    | alpha. -Ionene                   | -3.668 | -5.813 | Relatively Low |
| 590 | 131751571 | D-Camphene                       | -3.659 | -3.763 | Relatively Low |
| 591 | 12408     | patchouli alcohol                | -3.637 | -2.153 | Relatively Low |
| 592 | 170833    | hyperforin                       | -3.619 | -4.892 | Relatively Low |
| 593 | 5321047   | liquoric acid                    | -3.618 | -4.219 | Relatively Low |
| 594 | 11074994  | Octacosane                       | -3.596 | -5.236 | Relatively Low |
| 595 | 222284    | ISOPULEGOL                       | -3.591 | -4.919 | Relatively Low |
| 596 | 457801    | Atractylodin                     | -3.589 | -4.515 | Relatively Low |
| 597 | 14353410  | (+)-Ledol                        | -3.585 | -4.868 | Relatively Low |
| 598 | 92173967  | beta-sitosterol                  | -3.585 | -4.59  | Relatively Low |
| 599 | 12048     | poriferast-5-en-3beta-ol         | -3.573 | -4.828 | Relatively Low |
| 600 | 637511    | rengyoxide                       | -3.568 | -4.294 | Relatively Low |
| 601 | 8892      | (4S)-2,4-dimethylhexane          | -3.571 | -3.02  | Relatively Low |
| 602 | 443177    | 3-Ethylpentane                   | -3.566 | -5.684 | Relatively Low |

|     |           |                                                |        |        |                |
|-----|-----------|------------------------------------------------|--------|--------|----------------|
| 603 | 64971     | cinnamaldehyde                                 | -3.562 | -3.032 | Relatively Low |
| 604 | 10393     | hexanoic acid                                  | -3.551 | -5.081 | Relatively Low |
| 605 | 61450     | (4S,6S)-cis-Carveol                            | -3.531 | -4.332 | Relatively Low |
| 606 | 73299     | Mairin                                         | -3.531 | -3.316 | Relatively Low |
| 607 | 66540     | Tyrosol                                        | -3.522 | -4.553 | Relatively Low |
| 608 | 76969264  | ETHYL FURAN                                    | -3.517 | -5.416 | Relatively Low |
| 609 | 268208    | hederagenin                                    | -3.516 | -5.46  | Relatively Low |
| 610 | 5366074   | Truflex OBP                                    | -3.513 | -4.784 | Relatively Low |
| 611 | 101596917 | (2S,4S)-4-methyl-2-(2-methylprop-1-enyl) oxane | -3.506 | -4.244 | Relatively Low |
| 612 | 931       | 7-Acetoxy-2-methylisoflavone                   | -3.504 | -5.723 | Relatively Low |
| 613 | 7296      | Damascenone                                    | -3.493 | -4.883 | Relatively Low |
| 614 | 13584     | ( $\beta$ -maaliene)                           | -3.49  | -4.265 | Relatively Low |
| 615 | 7237      | naphthalene                                    | -3.477 | -4.919 | Relatively Low |
| 616 | 13572     | Methylcyclopentane                             | -3.462 | -3.964 | Relatively Low |
| 617 | 10467     | Methyl behenate                                | -3.456 | -3.419 | Relatively Low |
| 618 | 443163    | o-xylene                                       | -3.448 | -4.779 | Relatively Low |
| 619 | 14296     | 6-Methylheptan-2-one                           | -3.442 | -4.286 | Relatively Low |
| 620 | 443162    | Arachic acid                                   | -3.436 | -4.949 | Relatively Low |
| 621 | 17100     | (1R,2R,4R)-Dihydrocarveol                      | -3.436 | -5.161 | Relatively Low |
| 622 | 1549025   | tetramethylpyrazine                            | -3.426 | -4.406 | Relatively Low |
| 623 | 75519     | (L)-alpha-Terpineol                            | -3.426 | -4.224 | Relatively Low |
| 624 | 8034      | (-)-alpha-Terpineol                            | -3.419 | -4.176 | Relatively Low |
| 625 | 564       | NERYLACETATE                                   | -3.414 | -4.157 | Relatively Low |
| 626 | 19602     | Methyl tricosanoate                            | -3.411 | -3.642 | Relatively Low |

|     |          |                                  |        |        |                |
|-----|----------|----------------------------------|--------|--------|----------------|
| 627 | 8748     | MIAK                             | -3.4   | -5.304 | Relatively Low |
| 628 | 11412    | hexanoic acid                    | -3.39  | -4.259 | Relatively Low |
| 629 | 14498    | PENTYLFURAN                      | -3.388 | -5.178 | Relatively Low |
| 630 | 6432404  | $\beta$ -terpineol               | -3.365 | -5.513 | Relatively Low |
| 631 | 6054     | 2,3-dimethylhexane               | -3.361 | -5.658 | Relatively Low |
| 632 | 14259    | (1S,2S)-1,2-dimethylcyclopentane | -3.348 | -3.976 | Relatively Low |
| 633 | 20240    | CADINENE                         | -3.351 | -5.524 | Relatively Low |
| 634 | 7962     | PEL                              | -3.302 | -5.097 | Relatively Low |
| 635 | 5315649  | Methyl icosanoate                | -3.295 | -4.022 | Relatively Low |
| 636 | 17886    | Isobutyl benzoate                | -3.284 | -5.268 | Relatively Low |
| 637 | 8094     | Sextone B                        | -3.279 | -2.628 | Relatively Low |
| 638 | 33934    | gamma-Camphorene                 | -3.245 | -5.775 | Relatively Low |
| 639 | 5368821  | asernestioside B                 | -3.209 | -4.483 | Relatively Low |
| 640 | 7907     | heptanoic acid                   | -3.183 | -5.161 | Relatively Low |
| 641 | 5352451  | Diop                             | -3.151 | -4.882 | Relatively Low |
| 642 | 7282     | Allocymene                       | -3.142 | -4.825 | Relatively Low |
| 643 | 638011   | 2,2-DIMETHYLPENTANE              | -3.125 | -3.563 | Relatively Low |
| 644 | 15314349 | patchoulan 1,12-diol             | -3.12  | -3.956 | Relatively Low |
| 645 | 439202   | 3-Methylpentane                  | -3.26  | -3.501 | Relatively Low |
| 646 | 519960   | citral                           | -3.103 | -4.77  | Relatively Low |
| 647 | 122844   | (3S)-2,3-dimethylpentane         | -3.067 | -3.215 | Relatively Low |
| 648 | 5460988  | GGB                              | -3.057 | -3.574 | Relatively Low |
| 649 | 12613    | (-)-Cyclosativene                | -3.046 | -4.126 | Relatively Low |
| 650 | 26519    | Betulonic acid                   | -3.037 | -3.254 | Relatively Low |
| 651 | 5460660  | gadelaidic acid                  | -3.033 | -3.908 | Relatively Low |

|     |          |                                              |        |        |                |
|-----|----------|----------------------------------------------|--------|--------|----------------|
| 652 | 6549     | Apple oil                                    | -3.025 | -3.88  | Relatively Low |
| 653 | 6344     | Tetratriacontane                             | -3.025 | -3.977 | Relatively Low |
| 654 | 440917   | Docosanoate                                  | -3.025 | -5.018 | Relatively Low |
| 655 | 16330    | Linalool                                     | -3.023 | -4.652 | Relatively Low |
| 656 | 1549778  | WLN: G1G                                     | -3.015 | -3.983 | Relatively Low |
| 657 | 6782     | Hemo-sol                                     | -2.971 | -4.493 | Relatively Low |
| 658 | 61665    | WLN: 4OVR                                    | -2.937 | -4.651 | Relatively Low |
| 659 | 8842     | Geranylacetone                               | -2.912 | -4.266 | Relatively Low |
| 660 | 18635    | DIBP                                         | -2.899 | -4.068 | Relatively Low |
| 661 | 5320251  | Dehydroxylinalool oxide A                    | -2.888 | -3.896 | Relatively Low |
| 662 | 12407    | beta-Citronellol                             | -2.878 | -3.444 | Relatively Low |
| 663 | 61738    | Methional                                    | -2.869 | -4.737 | Relatively Low |
| 664 | 68406    | Octacosanedioic acid                         | -2.864 | -3.019 | Relatively Low |
| 665 | 8051     | HEXACOSANE                                   | -2.815 | -3.406 | Relatively Low |
| 666 | 74458    | 2-Hexanoylfuran                              | -2.813 | -4.334 | Relatively Low |
| 667 | 1549019  | Octacosanol                                  | -3.212 | -4.834 | Relatively Low |
| 668 | 5280489  | 2-heptanone                                  | -2.794 | -4.69  | Relatively Low |
| 669 | 637566   | Allyloxybenzene                              | -2.79  | -4.16  | Relatively Low |
| 670 | 57491032 | 3-Methyl-2-pent-2-enyl-cycl<br>opent-2-enone | -2.789 | -3.752 | Relatively Low |
| 671 | 5367807  | beta-carotene                                | -2.787 | -3.881 | Relatively Low |
| 672 | 8723     | geraniol                                     | -2.771 | -3.828 | Relatively Low |
| 673 | 5282109  | 3,7-dimethylnonane                           | -2.748 | -4.138 | Relatively Low |
| 674 | 16057860 | Isobutyl tiglate                             | -2.682 | -2.604 | Relatively Low |
| 675 | 15610    | 2-methyl-butanol-1-ol                        | -2.673 | -4.335 | Relatively Low |
| 676 | 5283335  | Geranyl formate                              | -2.667 | -1.836 | Relatively Low |

|     |           |                                      |        |        |                |
|-----|-----------|--------------------------------------|--------|--------|----------------|
| 677 | 28928     | Ginnol                               | -2.63  | -4.261 | Relatively Low |
| 678 | 637920    | METHYL<br>NONADECANOATE              | -2.61  | -3.15  | Relatively Low |
| 679 | 169019    | trans-2-nonenal                      | -2.579 | -3.149 | Relatively Low |
| 680 | 11173     | kanzonols T                          | -2.543 | -3.856 | Relatively Low |
| 681 | 13143     | pent-3-en-2-one                      | -2.535 | -3.229 | Relatively Low |
| 682 | 8344      | Threitol                             | -2.525 | -3.25  | Relatively Low |
| 683 | 5282184   | Prenol                               | -2.511 | -3.562 | Relatively Low |
| 684 | 9862      | Methyl butenone                      | -2.504 | -3.659 | Relatively Low |
| 685 | 102247659 | DMEP                                 | -2.456 | -3.72  | Relatively Low |
| 686 | 5281553   | Mandenol                             | -2.452 | -3.404 | Relatively Low |
| 687 | 12534     | Sulcatone                            | -2.436 | -3.355 | Relatively Low |
| 688 | 5367460   | 1,3-Heptadiene,<br>3-ethyl-2-methyl- | -2.417 | -4.735 | Relatively Low |
| 689 | 5281168   | p-Ocimene                            | -2.416 | -2.733 | Relatively Low |
| 690 | 5318042   | Tricosane                            | -2.39  | -3.402 | Relatively Low |
| 691 | 5321950   | Ethyl linolenate                     | -2.37  | -3.138 | Relatively Low |
| 692 | 11251     | Hexenal                              | -2.363 | -3.385 | Relatively Low |
| 693 | 12592     | 2-Hexenol                            | -2.36  | -3.205 | Relatively Low |
| 694 | 61020     | Tiglaldehyde                         | -2.332 | -3.364 | Relatively Low |
| 695 | 24762     | MIPK                                 | -2.331 | -4.689 | Relatively Low |
| 696 | 637564    | Tetracosane                          | -2.328 | -2.169 | Relatively Low |
| 697 | 6184      | Prenal                               | -2.306 | -2.759 | Relatively Low |
| 698 | 68972     | MYS                                  | -2.303 | -3.621 | Relatively Low |
| 699 | 3026      | Hexadienal                           | -2.287 | -3.08  | Relatively Low |
| 700 | 11519     | hexanal                              | -2.265 | -3.183 | Relatively Low |

|     |         |                                         |        |        |                |
|-----|---------|-----------------------------------------|--------|--------|----------------|
| 701 | 11636   | n-Triacontanol                          | -2.248 | -3.16  | Relatively Low |
| 702 | 643820  | DBP                                     | -2.234 | -4.678 | Relatively Low |
| 703 | 10975   | 3-methylheptane                         | -2.233 | -2.851 | Relatively Low |
| 704 | 2724898 | HEPTACOSANE                             | -2.233 | -2.267 | Relatively Low |
| 705 | 12409   | Nerol                                   | -2.199 | -2.466 | Relatively Low |
| 706 | 6431151 | Myrcenol                                | -2.182 | -3.714 | Relatively Low |
| 707 | 243696  | (S)-Matsutake alcohol                   | -2.153 | -2.455 | Relatively Low |
| 708 | 11507   | Nonacosane                              | -2.132 | -3.84  | Relatively Low |
| 709 | 8129    | (-)-cis-beta-Elemene                    | -2.118 | -2.073 | Relatively Low |
| 710 | 638122  | Nonacosanol                             | -2.097 | -2.148 | Relatively Low |
| 711 | 31272   | 3-methylhexane                          | -2.089 | -2.984 | Relatively Low |
| 712 | 263     | Heptanol                                | -2.073 | -3.16  | Relatively Low |
| 713 | 1549026 | C <sub>2</sub> H <sub>5</sub> CH=CHCOOH | -2.017 | -4.409 | Relatively Low |
| 714 | 25403   | Butylacetat                             | -2.002 | -3.728 | Relatively Low |
| 715 | 92776   | BuOH                                    | -1.959 | -4.484 | Relatively Low |
| 716 | 11582   | Neryl acetate                           | -1.942 | -3.213 | Relatively Low |
| 717 | 5281516 | Ethyltrimethylethylene                  | -1.936 | -1.672 | Relatively Low |
| 718 | 6561    | Zingiberene                             | -1.904 | -2.602 | Relatively Low |
| 719 | 8130    | ISOHEPTANE                              | -1.895 | -2.648 | Relatively Low |
| 720 | 246728  | alpha-Farnesene                         | -1.887 | -3.168 | Relatively Low |
| 721 | 94403   | Isobutyral                              | -1.869 | -3.508 | Relatively Low |
| 722 | 5283316 | WLN: VH6                                | -1.857 | -2.372 | Relatively Low |
| 723 | 5364961 | EAK                                     | -1.818 | -3.037 | Relatively Low |
| 724 | 22434   | Farnesol acetate                        | -1.815 | -4.378 | Relatively Low |
| 725 | 6584    | Heptenal                                | -1.81  | -2.35  | Relatively Low |
| 726 | 5362851 | (E)-1-butoxyhex-2-ene                   | -1.806 | -3.25  | Relatively Low |



|     |         |                        |        |        |                |
|-----|---------|------------------------|--------|--------|----------------|
| 727 | 379     | methyl henicanoate     | -1.792 | -2.355 | Relatively Low |
| 728 | 143243  | Tereton                | -1.737 | -4.505 | Relatively Low |
| 729 | 8158    | 2-Methylpent-2-en-1-ol | -1.713 | -2.909 | Relatively Low |
| 730 | 31253   | caprylic acid          | -1.688 | -2.964 | Relatively Low |
| 731 | 445070  | 1,6-Dicyclohexylhexane | -1.666 | -1.819 | Relatively Low |
| 732 | 7793    | nonanoic acid          | -1.558 | -4.266 | Relatively Low |
| 733 | 15395   | Myrcene                | -1.499 | -2.786 | Relatively Low |
| 734 | 5280934 | farnesol               | -1.417 | -1.956 | Relatively Low |
| 735 | 6276    | beta-Rhodinol          | -1.396 | -2.744 | Relatively Low |
| 736 | 7826    | Propyl vinyl ketone    | -1.374 | -2.601 | Relatively Low |
| 737 | 1549109 | linolenic acid         | -1.347 | -2.071 | Relatively Low |
| 738 | 8091    | Amylol                 | -1.334 | -2.918 | Relatively Low |
| 739 | 5364920 | Methyl heptoate        | -1.317 | -2.283 | Relatively Low |
| 740 | 11594   | (Z,E)-farnesol         | -1.273 | -2.684 | Relatively Low |
| 741 | 1711945 | Methyl octylate        | -1.25  | -3.055 | Relatively Low |
| 742 | 61346   | (E)-Pent-2-en-1-ol     | -1.203 | -2.068 | Relatively Low |
| 743 | 5281525 | Methylheptane          | -1.194 | -1.064 | Relatively Low |
| 744 | 31289   | Farnesylacetone        | -1.189 | -2.4   | Relatively Low |
| 745 | 5356544 | Vinyl amyl ketone      | -1.188 | -2.609 | Relatively Low |
| 746 | 8103    | C09704                 | -1.187 | -2.352 | Relatively Low |
| 747 | 517653  | Nonanal                | -1.151 | -2.203 | Relatively Low |
| 748 | 5364919 | Peruviol               | -1.107 | -2.638 | Relatively Low |
| 749 | 87370   | 1-hexanol              | -1.007 | -2.233 | Relatively Low |
| 750 | 31357   | Octadiene              | -0.951 | -2.014 | Relatively Low |
| 751 | 1549107 | CIS-2-PENTENOL         | -0.91  | -1.905 | Relatively Low |
| 752 | 6442707 | 1-Ethoxypentane        | -0.883 | -1.489 | Relatively Low |

|     |          |                             |        |        |                |
|-----|----------|-----------------------------|--------|--------|----------------|
| 753 | 10408    | TBP                         | -0.883 | -2.353 | Relatively Low |
| 754 | 21414    | (Z,Z)-farnesol              | -0.697 | -1.121 | Relatively Low |
| 755 | 957      | Safynol                     | -0.566 | -2.611 | Relatively Low |
| 756 | 5281167  | FITONE                      | -0.541 | -1.908 | Relatively Low |
| 757 | 5284421  | 2-octyldodecan-1-ol         | -0.477 | -1.886 | Relatively Low |
| 758 | 5280435  | octanol                     | -0.405 | -2.683 | Relatively Low |
| 759 | 98299    | 3-Hexenol                   | -0.397 | -2.093 | Relatively Low |
| 760 | 702      | METHYL LINOLEATE            | -0.303 | -0.372 | Relatively Low |
| 761 | 5362889  | phytol                      | -0.249 | -1.293 | Relatively Low |
| 762 | 78062472 | 2-bromododecane             | -0.223 | -1.972 | Relatively Low |
| 763 | 70214    | 3-ethyl-7hydroxyphthalide   | -0.222 | -2.542 | Relatively Low |
| 764 | 11597    | cis-.alpha.-Farnesene       | -0.216 | -1.696 | Relatively Low |
| 765 | 5281149  | 3,8-dimethylundecane        | -0.18  | -1.985 | Relatively Low |
| 766 | 17903416 | Diisobutyl succinate        | -0.102 | -1.279 | Relatively Low |
| 767 | 522345   | Hexene                      | 0.02   | -0.911 | Relatively Low |
| 768 | 69527    | panaxynol                   | 0.042  | -3.329 | Relatively Low |
| 769 | 5271570  | 12-methyltetradecanoate     | 0.081  | -1.812 | Relatively Low |
| 770 | 5281     | Methyl isoheptadecanoate    | 0.129  | -0.74  | Relatively Low |
| 771 | 105846   | Lauric anhydride            | 0.147  | -0.113 | Relatively Low |
| 772 | 5368064  | DBF                         | 0.154  | -0.519 | Relatively Low |
| 773 | 12366    | stearic acid                | 0.184  | -1.704 | Relatively Low |
| 774 | 10446    | heptadecyloxirane           | 0.211  | -1.415 | Relatively Low |
| 775 | 5364509  | Methyl 2-decenoate          | 0.242  | -1.35  | Relatively Low |
| 776 | 445639   | Ethylpalmitate              | 0.38   | -0.566 | Relatively Low |
| 777 | 8042     | neophytadiene               | 0.445  | -0.75  | Relatively Low |
| 778 | 5463904  | methyl (E)-octadec-2-enoate | 0.524  | -0.894 | Relatively Low |

|     |          |                         |       |        |                |
|-----|----------|-------------------------|-------|--------|----------------|
| 779 | 8181     | oleic acid              | 0.596 | 0.543  | Relatively Low |
| 780 | 8201     | Promyr                  | 0.601 | -1.012 | Relatively Low |
| 781 | 12398    | Ethyl 2-decenoate       | 0.636 | 1.679  | Relatively Low |
| 782 | 15267    | methyl palmitate        | 0.661 | 0.482  | Relatively Low |
| 783 | 985      | Methyl stearate         | 0.695 | -0.582 | Relatively Low |
| 784 | 11005    | Heptadekan              | 0.71  | -0.258 | Relatively Low |
| 785 | 15609    | 2-METHYLPENTADECAN<br>E | 0.744 | -0.683 | Relatively Low |
| 786 | 638303   | palmitic acid           | 0.764 | -0.462 | Relatively Low |
| 787 | 8139     | myristic acid           | 0.784 | -0.241 | Relatively Low |
| 788 | 3893     | Methyl margarate        | 0.817 | 0.104  | Relatively Low |
| 789 | 5367650  | Methyl palmitelaidate   | 1.103 | -0.282 | Relatively Low |
| 790 | 5362793  | Methyl laurate          | 1.119 | -1.193 | Relatively Low |
| 791 | 21204    | lauric acid             | 1.134 | -0.79  | Relatively Low |
| 792 | 75364    | 13-Tetradecenyl acetate | 1.137 | -0.019 | Relatively Low |
| 793 | 13849    | Methyl linolelaidate    | 1.242 | -0.496 | Relatively Low |
| 794 | 61303    | Methyl isomyristate     | 1.666 | -0.446 | Relatively Low |
| 795 | 12403    | 2-Tetradecanone         | 1.768 | 0.423  | Relatively Low |
| 796 | 8186     | PENTADECYCLIC ACID      | 1.877 | 0.715  | Relatively Low |
| 797 | 5283356  | 2-PENTADECANONE         | 1.971 | 0.833  | Relatively Low |
| 798 | 11635    | Henicosane              | 2.046 | 0.588  | Relatively Low |
| 799 | 25913    | undecanal               | 2.052 | 1.464  | Relatively Low |
| 800 | 31284    | Undecenal               | 2.286 | 0.107  | Relatively Low |
| 801 | 15099203 | Oktadekan               | 2.514 | 0.56   | Relatively Low |
| 802 | 143689   | Pentadecene             | 2.598 | 1.588  | Relatively Low |
| 803 | 8182     | Methyl myristate        | 2.608 | 1.334  | Relatively Low |

|     |           |                             |        |        |                              |
|-----|-----------|-----------------------------|--------|--------|------------------------------|
| 804 | 12388     | 1,4-Eicosadiene             | 2.624  | 1.554  | Relatively Low               |
| 805 | 12397     | 3-Undecyne                  | 2.631  | 1.498  | Relatively Low               |
| 806 | 12389     | Dodekan                     | 2.766  | 0.357  | Relatively Low               |
| 807 | 14257     | TRD                         | 2.998  | 0.865  | Relatively Low               |
| 808 | 138108061 | Pentadecanol                | -6.474 | -7.898 | Relatively Low               |
| 809 | 121304016 | tetradecane                 | -6.754 | -8.738 | The Best Control within 6LU7 |
| 810 | 92727     | UND                         | -7.037 | -7.794 | Control                      |
| 811 | 131411    | Macranthoside B             | -3.934 | -6.487 | Control                      |
| 812 | 37542     | Remdesivir                  | -5.977 | -6.159 | Control                      |
| 813 | 64927     | Lopinavir                   | -4.634 | -5.936 | Control                      |
| 814 | 492405    | Arbidol                     | -5.489 | -5.313 | Control                      |
| 815 | 503737    | Ribavirin                   | -7.41  | -6.627 | Relatively Low               |
| 816 | 9064      | Chloroquine Phosphate       | -6.392 | -6.945 | Relatively Low               |
| 817 | 441957    | Favipiravir ( <i>T705</i> ) | -6.288 | -4.631 | Relatively Low               |
| 818 | 14982     | liquiritin                  | -6.212 | -5.107 | Relatively Low               |
| 819 | 892       | (+)-catechin                | -6.106 | -5.934 | Relatively Low               |
| 820 | 5320083   | Ziziphin                    | -5.994 | -6.171 | Relatively Low               |
| 821 | 7067335   | Glycyram                    | -5.865 | -6.421 | Relatively Low               |
| 822 | 5318999   | inositol                    | -5.807 | -6.516 | Relatively Low               |
| 823 | 656516    | Glycyrol                    | -5.703 | -6.609 | Relatively Low               |
| 824 | 44257530  | terephthaldehyde            | -5.652 | -6.541 | Relatively Low               |
| 825 | 439767    | Licochalcone B              | -5.649 | -5.492 | Relatively Low               |
| 826 | 440989    | Amygdalin                   | -5.535 | -7.252 | Relatively Low               |
| 827 | 638278    | Phaseol                     | -5.52  | -8.363 | Relatively Low               |
| 828 | 1794427   | MNN                         | -5.479 | -5.887 | Relatively Low               |
| 829 | 9548674   | Machiline                   | -5.407 | -6.957 | Relatively Low               |

|     |          |                                                       |        |        |                |
|-----|----------|-------------------------------------------------------|--------|--------|----------------|
| 830 | 244      | isoliquiritigenin                                     | -5.385 | -5.85  | Relatively Low |
| 831 | 6917970  | Heriguard                                             | -5.198 | -6.164 | Relatively Low |
| 832 | 5757     | d-mandelonitrile                                      | -4.972 | -7.132 | Relatively Low |
| 833 | 119033   | WLN: Q1R                                              | -4.955 | -6.729 | Relatively Low |
| 834 | 5497163  | l-SPD                                                 | -4.917 | -3.651 | Relatively Low |
| 835 | 240      | 17-beta-estradiol                                     | -4.911 | -4.975 | Relatively Low |
| 836 | 5281522  | prunasin                                              | -4.905 | -4.445 | Relatively Low |
| 837 | 124052   | Olein                                                 | -4.848 | -6.603 | Relatively Low |
| 838 | 6918970  | WLN: VHR                                              | -4.845 | -6.539 | Relatively Low |
| 839 | 12303645 | Isocaryophyllene                                      | -4.818 | -4.822 | Relatively Low |
| 840 | 94253    | Glabridin                                             | -4.811 | -5.573 | Relatively Low |
| 841 | 18183610 | estrone                                               | -4.765 | -5.258 | Relatively Low |
| 842 | 6552009  | sitosterol                                            | -4.641 | -5.238 | Relatively Low |
| 843 | 638014   | Vulgarin                                              | -4.572 | -5.397 | Relatively Low |
| 844 | 11579    | WLN: QVR BVQ                                          | -4.513 | -4.334 | Relatively Low |
| 845 | 31404    | ()-Borneol                                            | -4.503 | -5.727 | Relatively Low |
| 846 | 5325911  | beta-Ionone                                           | -4.436 | -5.735 | Relatively Low |
| 847 | 11975273 | LEVA                                                  | -4.426 | -4.175 | Relatively Low |
| 848 | 64945    | butylated hydroxytoluene                              | -4.383 | -5.183 | Relatively Low |
| 849 | 17739    | (5S)-5-ethylloxolan-2-one                             | -4.263 | -5.078 | Relatively Low |
| 850 | 16666    | (6Z,10E,14E,18E)-2,6,10,15,<br>,6,10,14,18,22-hexaene | -4.206 | -5.316 | Relatively Low |
| 851 | 2724161  | ursolic acid                                          | -4.104 | -5.563 | Relatively Low |
| 852 | 442495   | Cerulignol                                            | -4.092 | -5.961 | Relatively Low |
| 853 | 5280794  | MENTHOL                                               | -4.069 | -5.09  | Relatively Low |

|     |         |                          |        |        |                |
|-----|---------|--------------------------|--------|--------|----------------|
| 854 | 5997    | ()-Terpinen-4-ol         | -3.912 | -5.051 | Relatively Low |
| 855 | 5281331 | Pulegone                 | -3.898 | -5.911 | Relatively Low |
| 856 | 3314    | Stigmasterol             | -3.881 | -4.567 | Relatively Low |
| 857 | 5282805 | CLR                      | -3.754 | -4.361 | Relatively Low |
| 858 | 7057904 | Spinasterol              | -3.678 | -4.914 | Relatively Low |
| 859 | 12408   | eugenol                  | -3.637 | -2.153 | Relatively Low |
| 860 | 64971   | 11,14-eicosadienoic acid | -3.562 | -3.032 | Relatively Low |
| 861 | 768     | (5S)-5-hexyloxolan-2-one | -3.526 | -3.757 | Relatively Low |
| 862 | 10467   | Octacosane               | -3.456 | -3.419 | Relatively Low |
| 863 | 5282768 | Mairin                   | -3.439 | -4.561 | Relatively Low |
| 864 | 443162  | [CHN]                    | -3.436 | -4.949 | Relatively Low |
| 865 | 19602   | Arachic acid             | -3.411 | -3.642 | Relatively Low |
| 866 | 5312549 | gondoic acid             | -3.357 | -4.28  | Relatively Low |
| 867 | 77914   | (L)-alpha-Terpineol      | -3.173 | -3.243 | Relatively Low |
| 868 | 26519   | PENTYLFURAN              | -3.037 | -3.254 | Relatively Low |
| 869 | 8215    | 11-docosenoic acid       | -3.033 | -3.908 | Relatively Low |
| 870 | 6782    | 6-Oxoctanoic acid        | -2.971 | -4.493 | Relatively Low |
| 871 | 12407   | Tetratriacontane         | -2.878 | -3.444 | Relatively Low |
| 872 | 12406   | Docosanoate              | -2.86  | -3.277 | Relatively Low |
| 873 | 443158  | DIBP                     | -2.812 | -3.88  | Relatively Low |
| 874 | 637566  | HEXACOSANE               | -2.79  | -4.16  | Relatively Low |
| 875 | 11008   | PENTACOSANE              | -2.757 | -3.352 | Relatively Low |
| 876 | 12535   | (R)-linalool             | -2.484 | -3.673 | Relatively Low |
| 877 | 12534   | geraniol                 | -2.436 | -3.355 | Relatively Low |
| 878 | 5281168 | Bicetyl                  | -2.416 | -2.733 | Relatively Low |
| 879 | 5318042 | TRIACONTANE              | -2.39  | -3.402 | Relatively Low |

|     |          |                             |        |        |                |
|-----|----------|-----------------------------|--------|--------|----------------|
| 880 | 12592    | Tricosane                   | -2.36  | -3.205 | Relatively Low |
| 881 | 5283349  | Hexenal                     | -2.341 | -2.997 | Relatively Low |
| 882 | 120074   | 2-Hexenol                   | -2.333 | -5.327 | Relatively Low |
| 883 | 6184     | Tetracosane                 | -2.306 | -2.759 | Relatively Low |
| 884 | 3026     | trans-2,4-decadienal        | -2.287 | -3.08  | Relatively Low |
| 885 | 11636    | Diisooctyl succinate        | -2.248 | -3.16  | Relatively Low |
| 886 | 12409    | hexanal                     | -2.199 | -2.466 | Relatively Low |
| 887 | 12405    | DBP                         | -2.178 | -2.945 | Relatively Low |
| 888 | 5283316  | HEPTACOSANE                 | -1.857 | -2.372 | Relatively Low |
| 889 | 12413    | Nonacosane                  | -1.79  | -3.442 | Relatively Low |
| 890 | 12523    | TWT                         | -1.7   | -2.339 | Relatively Low |
| 891 | 12411    | Heptenal                    | -1.657 | -3.613 | Relatively Low |
| 892 | 5280934  | Pentatriacontane            | -1.417 | -1.956 | Relatively Low |
| 893 | 31289    | phytane                     | -1.189 | -2.4   | Relatively Low |
| 894 | 8103     | Tritriacontane              | -1.187 | -2.352 | Relatively Low |
| 895 | 12410    | linolenic acid              | -1.093 | -2.454 | Relatively Low |
| 896 | 12575964 | Nonanal                     | -1.003 | -0.458 | Relatively Low |
| 897 | 1810797  | 1-hexanol                   | -0.568 | -1.656 | Relatively Low |
| 898 | 957      | Hentriacontan               | -0.566 | -2.611 | Relatively Low |
| 899 | 5284421  | 2-Hydroxy-hexadecanoic acid | -0.477 | -1.886 | Relatively Low |
| 900 | 5282760  | ZINC02169908                | -0.427 | -1.194 | Relatively Low |
| 901 | 5280435  | octanol                     | -0.405 | -2.683 | Relatively Low |
| 902 | 15979    | METHYL LINOLEATE            | -0.192 | -2.183 | Relatively Low |
| 903 | 5280450  | Isooleic acid               | -0.085 | -2.122 | Relatively Low |
| 904 | 445638   | phytol                      | 0.03   | -0.412 | Relatively Low |

|     |         |                   |       |        |                |
|-----|---------|-------------------|-------|--------|----------------|
| 905 | 5281    | pristane          | 0.129 | -0.74  | Relatively Low |
| 906 | 5364509 | EIC               | 0.242 | -1.35  | Relatively Low |
| 907 | 520298  | zoomaric acid     | 0.322 | -1.067 | Relatively Low |
| 908 | 445639  | stearic acid      | 0.38  | -0.566 | Relatively Low |
| 909 | 10465   | Exceparl M-OL     | 0.451 | -0.678 | Relatively Low |
| 910 | 8181    | Aseanostatin P1   | 0.596 | 0.543  | Relatively Low |
| 911 | 8201    | oleic acid        | 0.601 | -1.012 | Relatively Low |
| 912 | 12398   | Daturic acid      | 0.636 | 1.67   | Relatively Low |
| 913 | 985     | methyl palmitate  | 0.695 | -0.582 | Relatively Low |
| 914 | 11005   | Methyl stearate   | 0.71  | -0.258 | Relatively Low |
| 915 | 3893    | Heptadekan        | 0.817 | 0.104  | Relatively Low |
| 916 | 5282728 | palmitic acid     | 1.08  | 0.53   | Relatively Low |
| 917 | 12391   | myristic acid     | 1.225 | 0.876  | Relatively Low |
| 918 | 12401   | lauric acid       | 1.309 | -0.17  | Relatively Low |
| 919 | 12403   | 2-undecenoic acid | 1.768 | 0.423  | Relatively Low |
| 920 | 8222    | MYS               | 1.896 | -0.437 | Relatively Low |
| 921 | 11635   | UPL               | 2.046 | 0.588  | Relatively Low |
| 922 | 11006   | Henicosane        | 2.31  | 1.436  | Relatively Low |
| 923 | 5283345 | LFA               | 2.426 | 1.163  | Relatively Low |
| 924 | 12388   | Oktadekan         | 2.624 | 1.554  | Relatively Low |
| 925 | 12389   | hexadecane        | 2.766 | 0.357  | Relatively Low |
| 926 | 8914    | dec-2-enal        | 3.1   | 1.276  | Relatively Low |

919 unique ingredients of the 8 candidates were extracted from TCMSP and PubChem (PubChem CID and Molecular Name were attached here in details), and these all developed valid docking terminally. All docking results, besides seven positive controls, were showed in glide gscore (the lower, the better). In



addition, the notes were attached here for indicating the results contrasted with the best control (Ritonavir to 6VSB: -7.828 kcal/mol while Remdesivir to 6LU7: -8.738 kcal/mol). This included High in 6VSB (< -7.828 kcal/mol) / 6LU7 (< -8.738 kcal/mol), High in both (high affinity in both), Relatively Low (lower efficiency of the both), Control, The Best Control within 6VSB and The Best Control within 6LU7. The preferable results were listed by priority according to the docking results.

**Table S9. Preferable docking results among 2042 natural ingredients.**

| NO. | Compounds<br>CID | Compounds Name                                                                 | Docking Gscore<br>(kcal/mol) 6LU7# | Docking Gscore<br>(kcal/mol) 6VSB# | Label in Fig 4I         | Source Herbs (Abbreviation<br>(Latin Name, Chinese Pinyin)) |
|-----|------------------|--------------------------------------------------------------------------------|------------------------------------|------------------------------------|-------------------------|-------------------------------------------------------------|
| 1   | 9987332          | Sanggenone D                                                                   | -9.14                              | -7.509                             | Blue Dot (High in 6LU7) | SGen (Morus alba L., Sang Gen)                              |
| 2   | 124222341        | Tectorigenin 7-O-xylosylglucoside                                              | -8.798                             | -8.089                             | Blue Dot (High in 6LU7) | YX (Folium Ginkgo, Yin Xing)                                |
| 3   | 10169367         | Quercetin 3-O-β-D-(6"-p- coumaroyl) glucopyranosyl (1- 2)-α-L-rhamnopyranoside | -9.782                             | -7.506                             | Blue Dot (High in 6LU7) | Black Tea                                                   |
| 4   | 137119925        | Theaflavin-3-gallate                                                           | -9.149                             | -7.468                             | Blue Dot (High in 6LU7) | JL (Tribulus terrestris L. , Ji Li)                         |
| 5   | 137796485        | Quercetin 3-O-β-D-glucose-7-O-β-D-gentiobioside                                | -9.674                             | -7.433                             | Blue Dot (High in 6LU7) | YYH ( <i>E.brevicornum</i> Maxim., Yin Yang Huo)            |
| 6   | 92043273         | Epimedin A1                                                                    | -9.633                             | -7.382                             | Blue Dot (High in 6LU7) | JXC ( <i>Centella asiatica</i> (L.) Urban, Ji Xue Cao)      |
| 7   | 45356919         | Madecassoside                                                                  | -8.917                             | -7.346                             | Blue Dot (High in 6LU7) | Black Tea                                                   |
| 8   | 71307578         | Theaflavin-3'-gallate                                                          | -10.328                            | -7.228                             | Blue Dot (High in 6LU7) | SDH (Radix Rehmanniae Recens, Sheng Di Huang)               |
| 9   | 5281782          | Jionoside B1                                                                   | -8.951                             | -7.169                             | Blue Dot (High in 6LU7) | ZJNZ (Fructus Ligustri Lucidi, Zi Jing Nv Zhen)             |

|    |           |                                          |        |         |                          |                                                                  |
|----|-----------|------------------------------------------|--------|---------|--------------------------|------------------------------------------------------------------|
| 10 | 10101498  | Ligupurpuroside B                        | -9.921 | -7.09   | Blue Dot (High in 6LU7)  | DGP (Cortex Lycii, Di Gu Pi)                                     |
| 11 | 10346914  | Kukoamine B                              | -8.925 | -6.916  | Blue Dot (High in 6LU7)  | YZ (Polygala tenuifolia Willd, Yuan Zhi)                         |
| 12 | 46933844  | Tenuifoliside A                          | -8.871 | -6.843  | Blue Dot (High in 6LU7)  | LQ (Forsythiae Fructus, Lian Qiao)                               |
| 13 | 23958169  | Isoforsythiaside                         | -9.92  | -6.763  | Blue Dot (High in 6LU7)  | LLY (Sauropus spatulifolius Beille, Long Li Ye)                  |
| 14 | 9960512   | Kaempferol 3-O-gentiobioside             | -8.754 | -6.469  | Blue Dot (High in 6LU7)  | HM (Flos Sophorae Immaturus, Huai Mi)                            |
| 15 | 5280805   | Rutin                                    | -9.225 | -6.377  | Blue Dot (High in 6LU7)  | HM (Flos Sophorae Immaturus, Huai Mi)                            |
| 16 | 5318767   | Kaempferol-3-Rutinoside                  | -8.966 | -5.972  | Blue Dot (High in 6LU7)  | HH (Sophora Japonica L., Huai Hua), YX (Folium Ginkgo, Yin Xing) |
| 17 | 5320863   | Quercetin 3-O- $\beta$ -D-xylopyranoside | -8.934 | -5.671  | Blue Dot (High in 6LU7)  | RS (Radix Ginseng, Ren Shen)                                     |
| 18 | 9986191   | Panasenoside                             | -8.786 | -5.444  | Blue Dot (High in 6LU7)  | KS (Sophora flavescens Ait., Ku Shen)                            |
| 19 | 72936     | Kushenol F                               | -9.202 | -5.218  | Blue Dot (High in 6LU7)  | BGZ ( Psoraleae Fructus, Bu Gu Zhi)                              |
| 20 | 193679    | Isobavachin                              | -8.895 | -4.843  | Blue Dot (High in 6LU7)  | ZS (Fructus Aurantii Immaturus, Zhi Shi)                         |
| 21 | 439246    | Naringenin                               | -8.764 | -4.79   | Blue Dot (High in 6LU7)  | RCR (Cistanches Herba, Rou Cong Rong)                            |
| 22 | 21637830  | Tubuloside A                             | -9.104 | -3.753  | Blue Dot (High in 6LU7)  | Black Tea                                                        |
| 23 | 118718881 | Acetylarenobufagin                       | -6.616 | -10.954 | Green Dot (High in 6VSB) | CS (Bufonis Venenum, Chan Su)                                    |
| 24 | 137796326 | Ligupurpuroside C                        | -6.615 | -10.116 | Green Dot (High in 6VSB) | ZJNZ (Fructus Ligustri Lucidi, Zi Jing Nv Zhen)                  |

|    |          |                           |        |        |                          |                                                    |
|----|----------|---------------------------|--------|--------|--------------------------|----------------------------------------------------|
| 25 | 51346147 | Pseudoprotodioscin        | -4.983 | -9.713 | Green Dot (High in 6VSB) | CSL (Dioscorea nipponicaMakino, Chuan Shan Long)   |
| 26 | 71307448 | Cistanoside A             | -8.044 | -9.636 | Green Dot (High in 6VSB) | RCR (Cistanches Herba, Rou Cong Rong)              |
| 27 | 441885   | Protodeltonin             | -6.709 | -9.42  | Green Dot (High in 6VSB) | /                                                  |
| 28 | 442439   | Neohesperidin             | -7.682 | -9.041 | Green Dot (High in 6VSB) | CP (Pericarpium Citri Reticulatae, Chen Pi)        |
| 29 | 53462233 | Anemarsaponin B           | -7.008 | -8.863 | Green Dot (High in 6VSB) | ZM (Rhizoma Anemarrhenae, Zhi Mu)                  |
| 30 | 75061243 | Parishin B                | -8.173 | -8.758 | Green Dot (High in 6VSB) | TM (Gastrodiae Rhizoma, Tian Ma )                  |
| 31 | 14037387 | Tubeimoside II            | -4.594 | -8.745 | Green Dot (High in 6VSB) | TBM ( Rhizoma Bolbostemmatis, Tu Bei Mu)           |
| 32 | 5320686  | Tiliroside                | -7.936 | -8.739 | Green Dot (High in 6VSB) | JXH (Edgeworthia chrysantha Lindl., Jie Xiang Hua) |
| 33 | 53317652 | Platycodin D2             | -7.474 | -8.665 | Green Dot (High in 6VSB) | JG (Radix Platycodonis, Jie Geng)                  |
| 34 | 441892   | Protogracillin            | -7.41  | -8.642 | Green Dot (High in 6VSB) | CSL (Dioscorea nipponicaMakino, Chuan Shan Long)   |
| 35 | 51346169 | Jujuboside A              | -5.393 | -8.64  | Green Dot (High in 6VSB) | SZR (Ziziphi Spinosae Semen, Suan Zao Ren)         |
| 36 | 71571492 | Clinodiside A             | -6.827 | -8.61  | Green Dot (High in 6VSB) | DXL (Cholla Stem Caulis Opuntiae, Duan Xue Liu)    |
| 37 | 5281693  | Robinin                   | -8.562 | -8.604 | Green Dot (High in 6VSB) | YJH (Dendranthema indicum, Ye Ju Hua)              |
| 38 | 14189963 | Rubrofusarin gentiobiosid | -8.013 | -8.593 | Green Dot (High in 6VSB) | JMZ (Catsia tora Linn, Jue Ming Zi)                |

|    |           |                            |        |        |                          |                                                                     |
|----|-----------|----------------------------|--------|--------|--------------------------|---------------------------------------------------------------------|
| 39 | 5274591   | Isoliensinine              | -7.855 | -8.577 | Green Dot (High in 6VSB) | LZX (Nelumbon nucifera Gaertn, Lian Zi Xin)                         |
| 40 | 6442411   | Poliumoside                | -8.592 | -8.556 | Green Dot (High in 6VSB) | ZZ (Callicarpa dichotoma, Zi Zhu)                                   |
| 41 | 11491905  | Hederacoside C             | -6.554 | -8.55  | Green Dot (High in 6VSB) | CCT (Hedera nepalensis var. sinensis (Tobl.) Rehd, Chang Chun Teng) |
| 42 | 71307558  | Anemoside B4               | -7.364 | -8.515 | Green Dot (High in 6VSB) | BTW ( Pulsatillae Radix, Bai Tou Weng)                              |
| 43 | 46887681  | Gypenoside IX              | -6.174 | -8.515 | Green Dot (High in 6VSB) | JGL ( Pulsatillae Radix, Jiao Gu Lan)                               |
| 44 | 101568804 | Grosvenorine               | -6.198 | -8.489 | Green Dot (High in 6VSB) | LHG (Mormordica grosvenorii Swingle, Luo Han Guo)                   |
| 45 | 69964214  | Neodiosmin                 | -7.313 | -8.482 | Green Dot (High in 6VSB) | /                                                                   |
| 46 | 169853    | Procyanidin C1             | -6.794 | -8.475 | Green Dot (High in 6VSB) | SZ (Crataegus L., Shan Zha)                                         |
| 47 | 75412556  | Notoginsenoside Fc         | -7.111 | -8.407 | Green Dot (High in 6VSB) | SQ (Notoginseng Radix et Rhizoma , San Qi)                          |
| 48 | 2724385   | Digoxin                    | -6.316 | -8.406 | Green Dot (High in 6VSB) | /                                                                   |
| 49 | 127256227 | Polygalacin D              | -7.323 | -8.404 | Green Dot (High in 6VSB) | YZ (Polygalae Radix, Yuan Zhi)                                      |
| 50 | 442428    | Naringin                   | -6.891 | -8.371 | Green Dot (High in 6VSB) | ZS ( <i>Citrus aurantium</i> L., Zhi Shi)                           |
| 51 | 135403795 | Theaflavine-3,3'-digallate | -7.814 | -8.329 | Green Dot (High in 6VSB) | Black Tea                                                           |
| 52 | 100941542 | Ginsenoside Ra1            | -6.627 | -8.316 | Green Dot (High in 6VSB) | RS (Radix Ginseng, Ren Shen)                                        |
| 53 | 101389834 | Anemarsaponin C            | -6.355 | -8.266 | Green Dot (High in 6VSB) | ZM (Anemarrhenae Rhizoma, Zhi Mu)                                   |
| 54 | 133561676 | Ophiopogonin C             | -5.611 | -8.262 | Green Dot (High in 6VSB) | MD (Radix Ophiopogonis, Mai Dong)                                   |
| 55 | 441891    | Protodioscin               | -6.369 | -8.257 | Green Dot (High in 6VSB) | CSL ( <i>Dioscorea nipponica</i> Makino,                            |

|    |           |                                        |        |        |                          |                                                                           |
|----|-----------|----------------------------------------|--------|--------|--------------------------|---------------------------------------------------------------------------|
| 56 | 71307562  | Congmunoside VII                       | -6.13  | -8.238 | Green Dot (High in 6VSB) | Chuan Shan Long)<br>CM (Aralia chinensis, Cong Mu)                        |
| 57 | 134687322 | HuangjiangSu A                         | -5.637 | -8.216 | Green Dot (High in 6VSB) | JH (Rhizoma Curcumae Longae,<br>Jiang Huang)                              |
| 58 | 24177534  | 2,3,4,5-Tetracaffeoyl-D- Glucaric acid | -6.82  | -8.153 | Green Dot (High in 6VSB) | XFH (Inula japonica Thunb., Xuan<br>Fu Hua)                               |
| 59 | 15940177  | vina-ginsenoside R4                    | -4.752 | -8.147 | Green Dot (High in 6VSB) | RS (Radix Ginseng, Ren Shen)                                              |
| 60 | 14681435  | Arctigenin 4'-O- $\beta$ -gen          | -8.578 | -8.135 | Green Dot (High in 6VSB) | NBZ ( Fructus Arctii, Niu Bang Zi)                                        |
| 61 | 71307572  | Polyphyllin G                          | -7.251 | -8.12  | Green Dot (High in 6VSB) | CL (Rhizoma Paridis, Chong Lou)                                           |
| 62 | 442456    | Poncirin                               | -6.276 | -8.1   | Green Dot (High in 6VSB) | ZS ( <i>Citrus aurantium</i> L., Zhi Shi)                                 |
| 63 | 10557926  | Parishin A                             | -6.667 | -8.09  | Green Dot (High in 6VSB) | TM (Gastrodiae Rhizoma, Tian<br>Ma )                                      |
| 64 | 44575945  | Timosaponin B II                       | -7.287 | -8.075 | Green Dot (High in 6VSB) | ZM (Anemarrhenae Rhizoma, Zhi<br>Mu)                                      |
| 65 | 11993928  | Acanthopanaxoside B                    | -6.22  | -8.07  | Green Dot (High in 6VSB) | CCT (Hedera nepalensis var.<br>sinensis (Tobl.) Rehd, Chang Chun<br>Teng) |
| 66 | 176233    | Polyphyllin VII                        | -6.546 | -8.055 | Green Dot (High in 6VSB) | CL (Rhizoma Paridis, Chong Lou)                                           |
| 67 | 46200821  | Polyphyllin D                          | -7.078 | -8.049 | Green Dot (High in 6VSB) | CL (Rhizoma Paridis, Chong Lou)                                           |
| 68 | 44575944  | Anemarsaponin BIII                     | -5.294 | -8.039 | Green Dot (High in 6VSB) | ZM (Rhizoma Anemarrhenae, Zhi<br>Mu)                                      |
| 69 | 6325450   | Jionoside A1                           | -8.727 | -8.029 | Green Dot (High in 6VSB) | SDH (Radix Rehmanniae Recens,<br>Sheng Di Huang)                          |
| 70 | 11828754  | Alcesefoliside                         | -8.139 | -7.976 | Green Dot (High in 6VSB) | XGZ (Rubus corchorifolius L.f.,<br>Xuan Gou Zi)                           |
| 71 | 14564503  | Macranthoidin A                        | -7.597 | -7.959 | Green Dot (High in 6VSB) | SYH (Lonicera confusa DC., Shan                                           |

|    |           |                                     |         |         |                          |                                                             |
|----|-----------|-------------------------------------|---------|---------|--------------------------|-------------------------------------------------------------|
| 72 | 71307447  | Ciwujianoside B                     | -6.41   | -7.953  | Green Dot (High in 6VSB) | Yin Hua)<br>CWJ (Radix Acanthopanax<br>Senticos, Ci Wu Jia) |
| 73 | 6443665   | Safflomin A                         | -7.276  | -7.937  | Green Dot (High in 6VSB) | HH (Carthamus tinctorius L., Hong<br>Hua)                   |
| 74 | 134715163 | 3-Feruloyl-1-Sinapoyl sucrose       | -7.59   | -7.935  | Green Dot (High in 6VSB) | YZ (Polygala tenuifolia Willd,<br>Yuan Zhi)                 |
| 75 | 10374155  | Polygalasaponin V                   | -6.095  | -7.927  | Green Dot (High in 6VSB) | GZJ (Lemmaphyllum<br>microphyllum, Gua Zi Jin)              |
| 76 | 91440     | Sennoside B                         | -7.65   | -7.904  | Green Dot (High in 6VSB) | FXY ( Sennae Folium, Fan Xie<br>Ye)                         |
| 77 | 138108061 | Macranthoside B                     | -6.162  | -7.898  | Green Dot (High in 6VSB) | JYH (Lonicerae Japonicae Flos, Jin<br>Yin Hua)              |
| 78 | 441905    | Astragaloside III                   | -4.967  | -7.892  | Green Dot (High in 6VSB) | HQi (Hedysarum Multijugum<br>Maxim., Huang Qi)              |
| 79 | 21598300  | Saikosaponin F                      | -5.863  | -7.892  | Green Dot (High in 6VSB) | CH (Radix Bupleuri, Chai Hu)                                |
| 80 | 108174    | Carboxyatractyloside Potassium Salt | -5.647  | -7.882  | Green Dot (High in 6VSB) | CEZ (Fructus Xanthii, Cang Er Zi )                          |
| 81 | 51346137  | Saikosaponin D                      | -6.597  | -7.862  | Green Dot (High in 6VSB) | CH (Radix Bupleuri, Chai Hu)                                |
| 82 | 12855889  | Ginsenoside Rc                      | -5.798  | -7.848  | Green Dot (High in 6VSB) | RS (Radix Ginseng, Ren Shen)                                |
| 83 | 6451798   | Trilobatin                          | -5.828  | -7.839  | Green Dot (High in 6VSB) | DSK (Lithocarpus polystachyus<br>Rehd, Duo Sui Ke)          |
| 84 | 123339619 | 5-MethoxyPinocebroside              | -9.359  | -10.791 | Red Dot (High in Both)   | GHC ( <i>Penthorum chinense</i> Pursh,<br>Gan Huang Cao)    |
| 85 | 65238     | 1,2,3,4,6-Pentagalloylglucose       | -8.927  | -8.889  | Red Dot (High in Both)   | WBZ ( <i>Rhus chinensis</i> Mill., Wu<br>Bei Zi)            |
| 86 | 11664897  | Kaempferol 3-O-β-D-(6"-p-           | -11.316 | -8.732  | Red Dot (High in Both)   | YX (Folium Ginkgo, Yin Xing)                                |

|    |           | coumaroyl) glucopyranosyl (1-2)- $\alpha$ -L-rhamnopyranoside |        |        |                                           |   |
|----|-----------|---------------------------------------------------------------|--------|--------|-------------------------------------------|---|
| 87 | 392622    | Ritonavir                                                     | -8.089 | -7.828 | Orange Dot (The Best Control within 6VSB) | / |
| 88 | 121304016 | Remdesivir                                                    | -8.738 | -6.754 | Orange Dot (The Best Control within 6LU7) | / |
| 89 | 92727     | Lopinavir                                                     | -7.794 | -7.037 | Orange Dot (Control)                      | / |
| 90 | 131411    | Arbidol                                                       | -6.487 | -3.934 | Orange Dot (Control)                      | / |
| 91 | 37542     | Ribavirin                                                     | -6.159 | -5.977 | Orange Dot (Control)                      | / |
| 92 | 64927     | Chloroquine Phosphate                                         | -5.936 | -4.634 | Orange Dot (Control)                      | / |
| 93 | 492405    | Favipiravir (T705)                                            | -5.313 | -5.489 | Orange Dot (Control)                      | / |

We then extended to all 2042 natural compounds. Higher efficiency with 6LU7 was shown in NO.1 to NO.22, while 6VSB was NO.23 to NO.83 and the both was NO.84 to NO.86. The last seven listed were the same control. Source Herbs were named similar as Table 5, except for the Black Tea, using English. Fig 4I showed these data.

**Table S10. Extended potential ingredients with source herbs based on the newly docking results.**

| NO. | Components                                       | Docking Gscore (kcal/mol) 6LU7# | Docking Gscore (kcal/mol) 6VSB# | Source Herbs                     |
|-----|--------------------------------------------------|---------------------------------|---------------------------------|----------------------------------|
| 1   | K3 (Kaempferol 3-O- $\beta$ -D-(6"-p- coumaroyl) | -11.316                         | -8.732                          | YX (Folium Ginkgo, 银杏, Yin Xing) |

|    |                                                                                                   |         |        |                                                       |  |
|----|---------------------------------------------------------------------------------------------------|---------|--------|-------------------------------------------------------|--|
|    | glucopyranosyl (1-2)- $\alpha$ -L-rhamnopyranoside)                                               |         |        |                                                       |  |
| 2  | Q3 (Quercetin3-O- $\beta$ -D-(6"-p-coumaroyl) glucopyranosyl (1-2)- $\alpha$ -L-rhamnopyranoside) | -9.782  | -7.506 | YX (Folium Ginkgo, 银杏, Yin Xing)                      |  |
| 3  | Jionoside A1                                                                                      | -8.727  | -8.029 | SDH (Radix Rehmanniae Recens, 生地<br>黄, Shen Di Huang) |  |
| 4  | Jionoside B1                                                                                      | -8.951  | -7.169 | SDH (Radix Rehmanniae Recens, 生地<br>黄, Shen Di Huang) |  |
| 5  | Cistanoside A                                                                                     | -8.044  | -9.636 | RCR (Cistanches Herba, 肉苁蓉, Rou<br>Cong Rong)         |  |
| 6  | Tubuloside A                                                                                      | -9.104  | -3.753 | RCR (Cistanches Herba, 肉苁蓉, Rou<br>Cong Rong)         |  |
| 7  | Theaflavine-3,3'-digallate                                                                        | -7.814  | -8.329 | Black Tea                                             |  |
| 8  | Theaflavin-3-gallate                                                                              | -9.149  | -7.468 | Black Tea                                             |  |
| 9  | Theaflavin-3'-gallate                                                                             | -10.328 | -7.228 | Black Tea                                             |  |
| 10 | Ginsenoside Ra1                                                                                   | -6.627  | -8.316 | RS (Radix Ginseng, 人参, Ren Shen)                      |  |
| 11 | vina-ginsenoside R4                                                                               | -4.752  | -8.147 | RS (Radix Ginseng, 人参, Ren Shen)                      |  |
| 12 | Ginsenoside Rc                                                                                    | -5.798  | -7.848 | RS (Radix Ginseng, 人参, Ren Shen)                      |  |
| 13 | Panasenoside                                                                                      | -8.786  | -5.444 | RS (Radix Ginseng, 人参, Ren Shen)                      |  |
| 14 | Polygalacin D                                                                                     | -7.323  | -8.404 | YZ (Polygalae Radix, 远志, Yuan Zhi)                    |  |
| 15 | 3-Feruloyl-1-Sinapoyl sucrose                                                                     | -7.59   | -7.935 | YZ (Polygalae Radix, 远志, Yuan Zhi)                    |  |
| 16 | Tenuifoliside A                                                                                   | -8.871  | -6.843 | YZ (Polygalae Radix, 远志, Yuan Zhi)                    |  |
| 17 | Naringin                                                                                          | -6.891  | -8.371 | ZS (Fructus Aurantii Immaturus, 枳实,<br>Zhi Shi)       |  |
| 18 | Poncirin                                                                                          | -6.276  | -8.1   | ZS (Fructus Aurantii Immaturus, 枳实,<br>Zhi Shi)       |  |
| 19 | Naringenin                                                                                        | -8.764  | -4.79  | ZS (Fructus Aurantii Immaturus, 枳实,                   |  |



|    |                 |        |        |                                                 |
|----|-----------------|--------|--------|-------------------------------------------------|
| 20 | Polyphyllin G   | -7.251 | -8.12  | Zhi Shi)<br>CL (Rhizoma Paridis, 重楼, Chong Lou) |
| 21 | Polyphyllin VII | -6.546 | -8.055 | CL (Rhizoma Paridis, 重楼, Chong Lou)             |
| 22 | Polyphyllin D   | -7.078 | -8.049 | CL (Rhizoma Paridis, 重楼, Chong Lou)             |

This table showed the data in details, which was corresponded to Fig 4J. The most potential ingredients were selected after contrasted to controls, and traced back to corresponded herbs in turn. Herbs were presented by Acronyms (Latin name, Chinese name, Chinese Pin Yin), e.g., YX (Folium Ginkgo, 银杏, Yin Xing), etc. except for Black Tea using English name directly.

**Table S11. The all docking lists of 2,042 extended natural compounds.**

| NO. | CID       | Components Name    | Docking gscore<br>(kcal/mol) 6LU7# | Docking gscore<br>(kcal/mol) 6VSB# | Label                        |
|-----|-----------|--------------------|------------------------------------|------------------------------------|------------------------------|
| 1   | 492405    | Favipiravir (T705) | -5.313                             | -5.489                             | Control                      |
| 2   | 121304016 | Remdesivir         | -8.738                             | -6.754                             | The Best Control within 6LU7 |
| 3   | 392622    | Ritonavir          | -8.089                             | -7.828                             | The Best Control within 6VSB |
| 4   | 92727     | Lopinavir          | -7.794                             | -7.037                             | Control                      |
| 5   | 131411    | Arbidol            | -6.487                             | -3.934                             | Control                      |

|    |           |                                                                                                |         |        |              |
|----|-----------|------------------------------------------------------------------------------------------------|---------|--------|--------------|
| 6  | 37542     | Ribavirin                                                                                      | -6.159  | -5.977 | Control      |
| 7  | 64927     | Chloroquine Phosphate                                                                          | -5.936  | -4.634 | Control      |
| 8  | 9987332   | Sanggenone D                                                                                   | -9.14   | -7.509 | High in 6LU7 |
| 9  | 124222341 | Tectorigenin 7-O-xylosylglucoside                                                              | -8.798  | -8.089 | High in 6LU7 |
| 10 | 10169367  | Quercetin<br>3-O- $\beta$ -D-(6"-p-coumaroyl)glucopyranosyl(1-2)- $\alpha$ -L-rhamnopyranoside | -9.782  | -7.506 | High in 6LU7 |
| 11 | 137119925 | Theaflavin-3-gallate<br>Quercetin                                                              | -9.149  | -7.468 | High in 6LU7 |
| 12 | 137796485 | 3-O- $\beta$ -D-glucose-7-O- $\beta$ -D-gentiobioside                                          | -9.674  | -7.433 | High in 6LU7 |
| 13 | 92043273  | Epimedin A1                                                                                    | -9.633  | -7.382 | High in 6LU7 |
| 14 | 45356919  | Madecassoside                                                                                  | -8.917  | -7.346 | High in 6LU7 |
| 15 | 71307578  | Theaflavin-3'-gallate                                                                          | -10.328 | -7.228 | High in 6LU7 |
| 16 | 5281782   | Jionoside B1                                                                                   | -8.951  | -7.169 | High in 6LU7 |
| 17 | 10101498  | Ligupurpurososide B                                                                            | -9.921  | -7.09  | High in 6LU7 |
| 18 | 10346914  | Kukoamine B                                                                                    | -8.925  | -6.916 | High in 6LU7 |
| 19 | 46933844  | Tenuifoliside A                                                                                | -8.871  | -6.843 | High in 6LU7 |
| 20 | 23958169  | Isoforsythiaside                                                                               | -9.92   | -6.763 | High in 6LU7 |
| 21 | 9960512   | Kaempferol<br>3-O-gentiobioside                                                                | -8.754  | -6.469 | High in 6LU7 |
| 22 | 5280805   | Rutin                                                                                          | -9.225  | -6.377 | High in 6LU7 |

|    |           |                                          |        |         |              |
|----|-----------|------------------------------------------|--------|---------|--------------|
| 23 | 5318767   | Kaempferol-3-Rutinoside                  | -8.966 | -5.972  | High in 6LU7 |
| 24 | 5320863   | Quercetin 3-O- $\beta$ -D-xylopyranoside | -8.934 | -5.671  | High in 6LU7 |
| 25 | 9986191   | Panasenoside                             | -8.786 | -5.444  | High in 6LU7 |
| 26 | 72936     | Kushenol F                               | -9.202 | -5.218  | High in 6LU7 |
| 27 | 193679    | Isobavachin                              | -8.895 | -4.843  | High in 6LU7 |
| 28 | 439246    | Naringenin                               | -8.764 | -4.79   | High in 6LU7 |
| 29 | 21637830  | Tubuloside A                             | -9.104 | -3.753  | High in 6LU7 |
| 30 | 118718881 | Acetylarenobufagin                       | -6.616 | -10.954 | High in 6VSB |
| 31 | 137796326 | Ligupurpuroside C                        | -6.615 | -10.116 | High in 6VSB |
| 32 | 51346147  | Pseudoprotodioscin                       | -4.983 | -9.713  | High in 6VSB |
| 33 | 71307448  | Cistanoside A                            | -8.044 | -9.636  | High in 6VSB |
| 34 | 441885    | Protodeltonin                            | -6.709 | -9.42   | High in 6VSB |
| 35 | 442439    | Neohesperidin                            | -7.682 | -9.041  | High in 6VSB |
| 36 | 53462233  | Anemarsaponin B                          | -7.008 | -8.863  | High in 6VSB |
| 37 | 75061243  | Parishin B                               | -8.173 | -8.758  | High in 6VSB |
| 38 | 14037387  | Tubeimoside II                           | -4.594 | -8.745  | High in 6VSB |
| 39 | 5320686   | Tiliroside                               | -7.936 | -8.739  | High in 6VSB |
| 40 | 53317652  | Platycodin D2                            | -7.474 | -8.665  | High in 6VSB |
| 41 | 441892    | Protogracillin                           | -7.41  | -8.642  | High in 6VSB |
| 42 | 51346169  | Jujuboside A                             | -5.393 | -8.64   | High in 6VSB |
| 43 | 71571492  | Clinodiside A                            | -6.827 | -8.61   | High in 6VSB |
| 44 | 5281693   | Robinin                                  | -8.562 | -8.604  | High in 6VSB |
| 45 | 14189963  | Rubrofusarin gentiobiosid                | -8.013 | -8.593  | High in 6VSB |

|    |           |                                       |        |        |              |
|----|-----------|---------------------------------------|--------|--------|--------------|
| 46 | 5274591   | Isoliensinine                         | -7.855 | -8.577 | High in 6VSB |
| 47 | 6442411   | Poliumoside                           | -8.592 | -8.556 | High in 6VSB |
| 48 | 11491905  | Hederacoside C                        | -6.554 | -8.55  | High in 6VSB |
| 49 | 71307558  | Anemoside B4                          | -7.364 | -8.515 | High in 6VSB |
| 50 | 46887681  | Gypenoside IX                         | -6.174 | -8.515 | High in 6VSB |
| 51 | 101568804 | Grosvenorine                          | -6.198 | -8.489 | High in 6VSB |
| 52 | 69964214  | Neodiosmin                            | -7.313 | -8.482 | High in 6VSB |
| 53 | 169853    | Procyanidin C1                        | -6.794 | -8.475 | High in 6VSB |
| 54 | 75412556  | Notoginsenoside Fc                    | -7.111 | -8.407 | High in 6VSB |
| 55 | 2724385   | Digoxin                               | -6.316 | -8.406 | High in 6VSB |
| 56 | 127256227 | Polygalacin D                         | -7.323 | -8.404 | High in 6VSB |
| 57 | 442428    | Naringin                              | -6.891 | -8.371 | High in 6VSB |
| 58 | 135403795 | Theaflavine-3,3'-digallate            | -7.814 | -8.329 | High in 6VSB |
| 59 | 100941542 | Ginsenoside Ra1                       | -6.627 | -8.316 | High in 6VSB |
| 60 | 101389834 | Anemarsaponin C                       | -6.355 | -8.266 | High in 6VSB |
| 61 | 133561676 | Ophiopogonin C                        | -5.611 | -8.262 | High in 6VSB |
| 62 | 441891    | Protodioscin                          | -6.369 | -8.257 | High in 6VSB |
| 63 | 71307562  | Congmunoside VII                      | -6.13  | -8.238 | High in 6VSB |
| 64 | 134687322 | Huangjiangsu A                        | -5.637 | -8.216 | High in 6VSB |
| 65 | 24177534  | 2,3,4,5-Tetracaffeoyl-D-Glucaric acid | -6.82  | -8.153 | High in 6VSB |
| 66 | 15940177  | vina-ginsenoside R4                   | -4.752 | -8.147 | High in 6VSB |
| 67 | 14681435  | Arctigenin 4'-O- $\beta$ -gen         | -8.578 | -8.135 | High in 6VSB |
| 68 | 71307572  | Polyphyllin G                         | -7.251 | -8.12  | High in 6VSB |
| 69 | 442456    | Poncirin                              | -6.276 | -8.1   | High in 6VSB |

|    |           |                                        |        |         |              |
|----|-----------|----------------------------------------|--------|---------|--------------|
| 70 | 10557926  | Parishin A                             | -6.667 | -8.09   | High in 6VSB |
| 71 | 44575945  | Timosaponin B II                       | -7.287 | -8.075  | High in 6VSB |
| 72 | 11993928  | Acanthopanaxoside B                    | -6.22  | -8.07   | High in 6VSB |
| 73 | 176233    | Polyphyllin VII                        | -6.546 | -8.055  | High in 6VSB |
| 74 | 46200821  | Polyphyllin D                          | -7.078 | -8.049  | High in 6VSB |
| 75 | 44575944  | Anemarsaponin BIII                     | -5.294 | -8.039  | High in 6VSB |
| 76 | 6325450   | Jionoside A1                           | -8.727 | -8.029  | High in 6VSB |
| 77 | 11828754  | Alcesefoliside                         | -8.139 | -7.976  | High in 6VSB |
| 78 | 14564503  | Macranthoidin A                        | -7.597 | -7.959  | High in 6VSB |
| 79 | 71307447  | Ciwujianoside B                        | -6.41  | -7.953  | High in 6VSB |
| 80 | 6443665   | Safflomin A                            | -7.276 | -7.937  | High in 6VSB |
| 81 | 134715163 | 3-Feruloyl-1-Sinapoyl<br>sucrose       | -7.59  | -7.935  | High in 6VSB |
| 82 | 10374155  | Polygalasaponin V                      | -6.095 | -7.927  | High in 6VSB |
| 83 | 91440     | Sennoside B                            | -7.65  | -7.904  | High in 6VSB |
| 84 | 138108061 | Macranthoside B                        | -6.162 | -7.898  | High in 6VSB |
| 85 | 441905    | Astragaloside III                      | -4.967 | -7.892  | High in 6VSB |
| 86 | 21598300  | Saikosaponin F                         | -5.863 | -7.892  | High in 6VSB |
| 87 | 108174    | Carboxyatractyloside<br>Potassium Salt | -5.647 | -7.882  | High in 6VSB |
| 88 | 51346137  | Saikosaponin D                         | -6.597 | -7.862  | High in 6VSB |
| 89 | 12855889  | Ginsenoside Rc                         | -5.798 | -7.848  | High in 6VSB |
| 90 | 6451798   | Trilobatin                             | -5.828 | -7.839  | High in 6VSB |
| 91 | 123339619 | 5-MethoxyPinocembrosi<br>de            | -9.359 | -10.791 | High in Both |
| 92 | 65238     | 1,2,3,4,6-Pentagalloylgl               | -8.927 | -8.889  | High in Both |

|     |           |                         |         |        |                |
|-----|-----------|-------------------------|---------|--------|----------------|
|     |           | ucose                   |         |        |                |
|     |           | Kaempferol              |         |        |                |
|     |           | 3-O-β-D-(6"-p-          |         |        |                |
| 93  | 11664897  | coumaroyl)glucopyrano   | -11.316 | -8.732 | High in Both   |
|     |           | syl(1-                  |         |        |                |
|     |           | 2)-α-L-rhamnopyranosid  |         |        |                |
|     |           | e                       |         |        |                |
| 94  | 10033524  | Ophiopogonin D'         | -5.059  | -6.722 | Relatively Low |
| 95  | 122169313 | Terrestrosin D          | -7.839  | -7.819 | Relatively Low |
| 96  | 11968389  | 3',6-Disinapoylsucrose. | -6.126  | -7.817 | Relatively Low |
| 97  | 21636280  | Saikosaponin H          | -6.103  | -7.817 | Relatively Low |
| 98  | 114627    | Neoeriocitrin           | -7.509  | -7.813 | Relatively Low |
| 99  | 101920412 | Esculentoside H         | -5.774  | -7.811 | Relatively Low |
| 100 | 102004611 | Isosakuranin            | -6.088  | -7.808 | Relatively Low |
| 101 | 51106     | Daurisoline             | -6.984  | -7.803 | Relatively Low |
| 102 | 72284     | Chebulinic acid         | -6.339  | -7.754 | Relatively Low |
| 103 | 4613731   | Methyl Hesperidin       | -7.479  | -7.753 | Relatively Low |
| 104 | 16760075  | Didymin                 | -6.613  | -7.738 | Relatively Low |
| 105 | 90657714  | Notoginsenoside Fe      | -6.409  | -7.737 | Relatively Low |
| 106 | 70698266  | Desapioplatycodin D     | -4.967  | -7.728 | Relatively Low |
| 107 | 125181875 | Hosenkoside F           | -6.024  | -7.714 | Relatively Low |
|     |           | Dimethyl                |         |        |                |
| 108 | 72814155  | lithospermate B         | -8.541  | -7.713 | Relatively Low |
| 109 | 11629473  | Polygalasaponin F       | -5.851  | -7.712 | Relatively Low |
| 110 | 5280746   | Apiin                   | -6.704  | -7.702 | Relatively Low |
| 111 | 5748394   | Epimedin C              | -7.843  | -7.7   | Relatively Low |

|     |           |                                        |        |        |                |
|-----|-----------|----------------------------------------|--------|--------|----------------|
| 112 | 51666248  | Neoliquiritin                          | -6.649 | -7.692 | Relatively Low |
| 113 | 30231     | Neohesperidin<br>Dihydrochalcone       | -6.698 | -7.69  | Relatively Low |
| 114 | 25087702  | Baohuoside V                           | -8.42  | -7.685 | Relatively Low |
| 115 | 5317025   | Acaciin                                | -6.556 | -7.685 | Relatively Low |
| 116 | 639665    | Xanthohumol                            | -7.298 | -7.685 | Relatively Low |
| 117 | 162859    | Platycodin D                           | -6.528 | -7.682 | Relatively Low |
| 118 | 91973814  | Notoginsenoside Ft1                    | -5.849 | -7.678 | Relatively Low |
| 119 | 6476333   | Isoacteoside                           | -6.331 | -7.674 | Relatively Low |
| 120 | 160644    | Liensinine                             | -7.262 | -7.672 | Relatively Low |
| 121 | 71307566  | Liensinine<br>Diperchlorate            | -7.9   | -7.672 | Relatively Low |
| 122 | 14284436  | Asperosaponin VI                       | -5.92  | -7.671 | Relatively Low |
| 123 | 102004930 | Hosenkoside G                          | -8.236 | -7.662 | Relatively Low |
| 124 | 44630346  | Xyloglucan<br>heptasaccharide          | -8.497 | -7.659 | Relatively Low |
| 125 | 10396409  | Hosenkoside M                          | -6.24  | -7.646 | Relatively Low |
| 126 | 10328746  | Ardisiacrispin A                       | -6.726 | -7.645 | Relatively Low |
| 127 | 51346142  | 20(R)-Ginsenoside<br>Rg3               | -6.315 | -7.623 | Relatively Low |
| 128 | 74977425  | Chrysin<br>7-O- $\beta$ -gentiobioside | -5.972 | -7.617 | Relatively Low |
| 129 | 5486199   | Kaempferitrin                          | -6.298 | -7.61  | Relatively Low |
| 130 | 5281667   | kuwanon G                              | -6.958 | -7.605 | Relatively Low |
| 131 | 24721205  | Asiaticoside                           | -6.896 | -7.602 | Relatively Low |
| 132 | 6072      | Phloridzin                             | -7.347 | -7.602 | Relatively Low |

|     |           |                                      |        |        |                |
|-----|-----------|--------------------------------------|--------|--------|----------------|
| 133 | 102482481 | Officinalisinin I                    | -7.952 | -7.596 | Relatively Low |
| 134 | 138112388 | Proanthocyanidin A4                  | -8.078 | -7.588 | Relatively Low |
| 135 | 101838198 | Notoginsenoside FP2                  | -6.63  | -7.583 | Relatively Low |
| 136 | 71307556  | Anemarsaponin E                      | -6.242 | -7.583 | Relatively Low |
| 137 | 5748393   | Epimedin B                           | -5.59  | -7.578 | Relatively Low |
| 138 | 102594495 | Mogroside II A2                      | -6.954 | -7.55  | Relatively Low |
| 139 | 441923    | Ginsenoside Rg1                      | -6.537 | -7.542 | Relatively Low |
| 140 | 441934    | Notoginsenoside R1                   | -6.442 | -7.54  | Relatively Low |
| 141 | 122169314 | Terrestrosin K                       | -5.661 | -7.529 | Relatively Low |
| 142 | 76959646  | Rhodosin                             | -6.992 | -7.528 | Relatively Low |
| 143 | 5489425   | Tubeimoside III                      | -6.141 | -7.528 | Relatively Low |
| 144 | 3082025   | Dryocrassin                          | -8.237 | -7.528 | Relatively Low |
| 145 | 46783811  | Saikosaponin C                       | -6.637 | -7.527 | Relatively Low |
| 146 | 5486699   | Troxerutin                           | -7.908 | -7.527 | Relatively Low |
| 147 | 5282160   | Quercetin-7-O-beta-D-glucopyranoside | -6.12  | -7.52  | Relatively Low |
| 148 | 185958    | Vicenin III                          | -7.334 | -7.519 | Relatively Low |
| 149 | 21597353  | Spinosin B                           | -6.987 | -7.514 | Relatively Low |
| 150 | 5281800   | Acteoside                            | -6.964 | -7.513 | Relatively Low |
| 151 | 131849056 | Gypenoside A                         | -6.784 | -7.5   | Relatively Low |
| 152 | 131636627 | 1,3,5-Tricaffeoylquinic acid         | -8.26  | -7.492 | Relatively Low |
| 153 | 11263254  | Methyl protodioscin                  | -6.383 | -7.491 | Relatively Low |
| 154 | 5281773   | Forsythoside A                       | -7.575 | -7.491 | Relatively Low |
| 155 | 91758420  | Buddlejasaponin IVb                  | -7.904 | -7.491 | Relatively Low |
| 156 | 5282150   | Rhoifolin                            | -7.198 | -7.48  | Relatively Low |



|     |           |                                      |        |        |                |
|-----|-----------|--------------------------------------|--------|--------|----------------|
| 157 | 23757181  | Angoroside C                         | -8.195 | -7.47  | Relatively Low |
| 158 | 11592917  | Clitorin                             | -7.478 | -7.457 | Relatively Low |
| 159 | 71717038  | Momordicoside A                      | -6.599 | -7.456 | Relatively Low |
| 160 | 44584733  | Punicalagin                          | -2.666 | -7.45  | Relatively Low |
| 161 | 138107979 | Rebaudioside F                       | -7.179 | -7.437 | Relatively Low |
| 162 | 46173830  | Sennoside D                          | -7.086 | -7.432 | Relatively Low |
| 163 | 21599443  | Bacopasaponin C                      | -7.796 | -7.428 | Relatively Low |
| 164 | 21629996  | 2-Acetylacteoside                    | -6.67  | -7.427 | Relatively Low |
| 165 | 6474310   | 3,5-Dicaffeoylquinic acid            | -6.022 | -7.425 | Relatively Low |
| 166 | 159654    | Neferine                             | -6.285 | -7.425 | Relatively Low |
| 167 | 101422334 | Vitexin<br>2"-O-p-coumarate          | -7.805 | -7.423 | Relatively Low |
| 168 | 102004853 | 9"-Methyl salvianolate B             | -8.171 | -7.417 | Relatively Low |
| 169 | 503737    | Liquiritin                           | -6.627 | -7.41  | Relatively Low |
| 170 | 10417462  | ligustroflavone                      | -6.545 | -7.409 | Relatively Low |
| 171 | 11968391  | Tenuifoliside C                      | -6.22  | -7.408 | Relatively Low |
| 172 | 167928    | Saikosaponin A                       | -5.866 | -7.407 | Relatively Low |
| 173 | 204       | Allantoin                            | -7.54  | -7.401 | Relatively Low |
| 174 | 452707    | 1,3,6-Tri-O-galloyl-beta-D-          | -7.175 | -7.399 | Relatively Low |
| 175 | 21637637  | 11( $\alpha$ )-methoxysaikosaponin F | -6.623 | -7.394 | Relatively Low |
| 176 | 122738    | Procyanidin B2                       | -6.422 | -7.39  | Relatively Low |
| 177 | 73111     | Sennoside A                          | -5.982 | -7.386 | Relatively Low |

|     |           |                                        |        |        |                |
|-----|-----------|----------------------------------------|--------|--------|----------------|
| 178 | 5281668   | Kuwanon H                              | -7.884 | -7.38  | Relatively Low |
| 179 | 21599442  | Bacopaside I                           | -6.46  | -7.379 | Relatively Low |
| 180 | 5280441   | Vitexin                                | -6.805 | -7.367 | Relatively Low |
| 181 | 5317644   | Aloe-emodin-8-O-beta-D-glucopyranoside | -7.975 | -7.361 | Relatively Low |
| 182 | 5089683   | Corilagin                              | -5.066 | -7.358 | Relatively Low |
| 183 | 72941582  | Dulcoside A                            | -6.519 | -7.355 | Relatively Low |
| 184 | 21635749  | Picfeltarraenin IV                     | -4.953 | -7.349 | Relatively Low |
| 185 | 101953010 | Otophyllaside A                        | -5.44  | -7.337 | Relatively Low |
| 186 | 168849    | Pectolarin                             | -7.536 | -7.333 | Relatively Low |
| 187 | 442437    | Neoastilbin                            | -6.704 | -7.332 | Relatively Low |
| 188 | 5281233   | Crocin I                               | -3.495 | -7.331 | Relatively Low |
| 189 | 11250133  | Procyanidin B1                         | -6.474 | -7.322 | Relatively Low |
| 190 | 249332    | Vincristine Sulfate                    | -4.755 | -7.313 | Relatively Low |
| 191 | 36314     | Paclitaxel                             | -6.558 | -7.301 | Relatively Low |
| 192 | 5978      | Vincristine                            | -5.307 | -7.297 | Relatively Low |
| 193 | 16007240  | Gypenoside XLIX                        | -4.77  | -7.283 | Relatively Low |
| 194 | 92794     | Naringenin-7-O-β-D-glucoside           | -6.778 | -7.278 | Relatively Low |
| 195 | 5492427   | Baohuoside VII                         | -5.953 | -7.277 | Relatively Low |
| 196 | 46173829  | Sennoside C                            | -7.497 | -7.265 | Relatively Low |
| 197 | 10079485  | Otophyllaside B                        | -5.435 | -7.264 | Relatively Low |
| 198 | 124005    | Maltopentaose                          | -7.821 | -7.252 | Relatively Low |
| 199 | 6917976   | Ginsenoside Rb2                        | -5.586 | -7.25  | Relatively Low |
| 200 | 5320313   | Oroxin A                               | -7.364 | -7.25  | Relatively Low |

|     |           |                                                                 |        |        |                |
|-----|-----------|-----------------------------------------------------------------|--------|--------|----------------|
| 201 | 143802279 | 8,9-epoxy-3,10-<br>diisobutyryloxythymol<br>6-Methoxykaempferol | -6.596 | -7.248 | Relatively Low |
| 202 | 70694423  | 3-O-<br>rutinoside                                              | -7.841 | -7.246 | Relatively Low |
| 203 | 21637642  | Saikosaponin B2                                                 | -5.586 | -7.242 | Relatively Low |
| 204 | 21627940  | Dipsacoside B                                                   | -6.948 | -7.24  | Relatively Low |
| 205 | 122097    | Soyasaponin Bb                                                  | -5.189 | -7.231 | Relatively Low |
| 206 | 5317093   | Epimedoside A                                                   | -8.664 | -7.224 | Relatively Low |
| 207 | 5322089   | Resveratrol<br>4'-Glucoside                                     | -5.835 | -7.222 | Relatively Low |
| 208 | 21633072  | Pseudoginsenoside F11                                           | -6.755 | -7.205 | Relatively Low |
| 209 | 73400     | Dauricine                                                       | -6.756 | -7.191 | Relatively Low |
| 210 | 442458    | Sanggenon C<br>Luteolin                                         | -7.499 | -7.184 | Relatively Low |
| 211 | 101248035 | 7-apiosyl-(1->2)-<br>glucoside                                  | -7.742 | -7.178 | Relatively Low |
| 212 | 10621     | Hesperidin                                                      | -7.762 | -7.174 | Relatively Low |
| 213 | 5281321   | Cucurbitacin I                                                  | -5.5   | -7.168 | Relatively Low |
| 214 | 10077207  | Oroxin B                                                        | -7.682 | -7.168 | Relatively Low |
| 215 | 71307582  | Vaccarin                                                        | -6.601 | -7.155 | Relatively Low |
| 216 | 11593362  | 3 $\alpha$ -Hydroxymogrol                                       | -6.058 | -7.15  | Relatively Low |
| 217 | 5281793   | Salvianolic acid A                                              | -6.692 | -7.14  | Relatively Low |
| 218 | 21637632  | Saikosaponin E                                                  | -5.375 | -7.132 | Relatively Low |
| 219 | 119245    | Dioscin                                                         | -5.078 | -7.129 | Relatively Low |
| 220 | 102120501 | Picfeltarraenin IB                                              | -4.919 | -7.124 | Relatively Low |

|     |           |                                   |        |        |                |
|-----|-----------|-----------------------------------|--------|--------|----------------|
| 221 | 127509    | Apiopaeonoside                    | -6.718 | -7.117 | Relatively Low |
| 222 | 10473311  | Licochalcone D                    | -5.93  | -7.112 | Relatively Low |
| 223 | 5469424   | Demethoxycurcumin                 | -7.719 | -7.112 | Relatively Low |
| 224 | 21626520  | Pennogenin 3-O-beta-chacotrioside | -4.499 | -7.102 | Relatively Low |
| 225 | 129449684 | Forsythoside H                    | -8.092 | -7.099 | Relatively Low |
| 226 | 71522133  | 17-Hydroxy sprengerinin C         | -5.343 | -7.097 | Relatively Low |
| 227 | 21581293  | sibiricaxanthone B                | -7.331 | -7.096 | Relatively Low |
| 228 | 17752183  | 11-Oxomogroside III               | -5.956 | -7.083 | Relatively Low |
| 229 | 169511    | Tracheloside                      | -6.972 | -7.079 | Relatively Low |
| 230 | 11650910  | Pulsatilla saponin D              | -4.941 | -7.073 | Relatively Low |
| 231 | 73296     | Alpha-Hederin                     | -7.079 | -7.072 | Relatively Low |
| 232 | 12358846  | 1,4-Dicaffeoylquinic acid         | -6.199 | -7.067 | Relatively Low |
| 233 | 135403798 | Theaflavin                        | -7.112 | -7.066 | Relatively Low |
| 234 | 137796480 | Saikosaponin B4                   | -5.364 | -7.05  | Relatively Low |
| 235 | 5388496   | Punicalin                         | -4.792 | -7.049 | Relatively Low |
| 236 | 91808875  | Monensin B                        | -5.079 | -7.042 | Relatively Low |
| 237 | 25115190  | Camelliaside B                    | -7.239 | -7.042 | Relatively Low |
| 238 | 5281318   | Cucurbitacin D                    | -5.241 | -7.035 | Relatively Low |
| 239 | 83489     | Eriocitrin                        | -7.117 | -7.027 | Relatively Low |
| 240 | 75412560  | Tenacissoside H                   | -5.121 | -7.027 | Relatively Low |
| 241 | 5281255   | Isobavachalcone                   | -7.809 | -7.02  | Relatively Low |
| 242 | 6918448   | Neomangiferin                     | -7.537 | -7.019 | Relatively Low |
| 243 | 5281645   | Lancerin                          | -6.52  | -7.015 | Relatively Low |

|     |           |                                       |        |        |                |
|-----|-----------|---------------------------------------|--------|--------|----------------|
| 244 | 9823887   | Rosavin                               | -7.877 | -7.011 | Relatively Low |
| 245 | 9918693   | Ginsenoside Rg3                       | -6.133 | -7.01  | Relatively Low |
| 246 | 120742    | Nepetin-7-glucoside                   | -6.634 | -7.003 | Relatively Low |
| 247 | 21603986  | Paris saponin II                      | -5.116 | -7.003 | Relatively Low |
| 248 | 146798    | Procyanidin B3                        | -8.076 | -6.993 | Relatively Low |
| 249 | 11953944  | Purpureaside C                        | -8.146 | -6.985 | Relatively Low |
| 250 | 5281613   | Diosmin                               | -6.089 | -6.981 | Relatively Low |
| 251 | 124034    | Swertisin                             | -5.707 | -6.975 | Relatively Low |
| 252 | 6453359   | 2"-O-Galloylhyperin                   | -7.498 | -6.971 | Relatively Low |
| 253 | 23928102  | Forsythoside B                        | -8.383 | -6.97  | Relatively Low |
| 254 | 5318597   | Isomangiferin                         | -6.398 | -6.96  | Relatively Low |
| 255 | 159646    | Lycobetaine                           | -7.958 | -6.957 | Relatively Low |
| 256 | 100966786 | Steviol-19-O-Glucoside                | -7.149 | -6.954 | Relatively Low |
| 257 | 92044471  | Cimiracemoside D                      | -5.974 | -6.945 | Relatively Low |
| 258 | 10146542  | Xylopentaose                          | -7.852 | -6.945 | Relatively Low |
| 259 | 24096391  | Octopamine, N-feruloyl-               | -6.653 | -6.939 | Relatively Low |
| 260 | 181183    | Hemslecin A                           | -5.942 | -6.919 | Relatively Low |
| 261 | 101604422 | Syringaresnol-4-O-beta-D-apiofuranosy | -7.001 | -6.917 | Relatively Low |
| 262 | 5282152   | Lonicerin                             | -6.341 | -6.916 | Relatively Low |
| 263 | 11330069  | Styraxlignolide F                     | -6.142 | -6.91  | Relatively Low |
| 264 | 5281316   | Cucurbitacin B                        | -4.371 | -6.908 | Relatively Low |
| 265 | 102004864 | Orientin 2"-O-p-trans-coumarate       | -8.253 | -6.908 | Relatively Low |
| 266 | 442089    | Stevioside                            | -8.207 | -6.907 | Relatively Low |

|     |           |                                          |        |        |                |
|-----|-----------|------------------------------------------|--------|--------|----------------|
| 267 | 442659    | Swertiajaponin                           | -7.218 | -6.896 | Relatively Low |
| 268 | 5273567   | Calceolarioside B                        | -7.868 | -6.895 | Relatively Low |
| 269 | 134692398 | Pinocembroside<br>Kaempferol             | -6.544 | -6.895 | Relatively Low |
| 270 | 12960460  | 3-sophoroside-7-<br>glucoside            | -7.212 | -6.894 | Relatively Low |
| 271 | 11629084  | Salvianolic acid B                       | -7.391 | -6.893 | Relatively Low |
| 272 | 10883790  | 14,15beta-<br>Dihydroxyklaineane         | -5.835 | -6.887 | Relatively Low |
| 273 | 129896873 | Glomeratose A                            | -5.731 | -6.884 | Relatively Low |
| 274 | 21637635  | Saikosaponin B3                          | -5.741 | -6.882 | Relatively Low |
| 275 | 101881655 | Caesappanin C                            | -5.074 | -6.872 | Relatively Low |
| 276 | 101740054 | Polygalaxanthone XI                      | -7.237 | -6.869 | Relatively Low |
| 277 | 102004870 | 14-hydroxysprengerinin<br>C              | -5.027 | -6.866 | Relatively Low |
| 278 | 101967019 | Sylvestroside I                          | -7.132 | -6.857 | Relatively Low |
| 279 | 442664    | Vicenin II                               | -7.332 | -6.857 | Relatively Low |
| 280 | 11016019  | Diosmetin-7-O-beta-D-<br>glucopyranoside | -6.047 | -6.856 | Relatively Low |
| 281 | 169961    | Rhodojaponin V                           | -4.895 | -6.848 | Relatively Low |
| 282 | 14136851  | Oleuroside                               | -6.468 | -6.842 | Relatively Low |
| 283 | 9898279   | Ginsenoside Rb1                          | -6.695 | -6.833 | Relatively Low |
| 284 | 5487343   | Camellianin A                            | -6.583 | -6.829 | Relatively Low |
| 285 | 21630094  | Hederacoside D                           | -6.682 | -6.823 | Relatively Low |
| 286 | 12912363  | Ginsenoside Rb3                          | -6.42  | -6.805 | Relatively Low |
| 287 | 101826550 | Saikosaponin G                           | -7.152 | -6.799 | Relatively Low |

|     |           |                                 |        |        |                |
|-----|-----------|---------------------------------|--------|--------|----------------|
| 288 | 2153      | Theophylline                    | -6.66  | -6.797 | Relatively Low |
| 289 | 10317069  | Xanthohumol D                   | -8.254 | -6.796 | Relatively Low |
| 290 | 6326021   | Sibiricose A6                   | -6.995 | -6.787 | Relatively Low |
| 291 | 10055215  | Tenuifoliside B                 | -7.521 | -6.778 | Relatively Low |
| 292 | 6326022   | Sibirioside A                   | -7.105 | -6.777 | Relatively Low |
| 293 | 6450879   | Bavachalcone                    | -6.098 | -6.777 | Relatively Low |
| 294 | 9875547   | Saikosaponin B1                 | -6.08  | -6.767 | Relatively Low |
| 295 | 71307561  | Congmunoside V                  | -6.562 | -6.758 | Relatively Low |
| 296 | 5281771   | Echinacoside                    | -5.969 | -6.754 | Relatively Low |
| 297 | 176596    | Momordin Ic                     | -6.717 | -6.74  | Relatively Low |
| 298 | 46173859  | Ophiopogonin D                  | -6.098 | -6.739 | Relatively Low |
| 299 | 24121289  | Picroside III                   | -7.247 | -6.734 | Relatively Low |
| 300 | 28523     | Tomatine                        | -7.574 | -6.734 | Relatively Low |
| 301 | 5281718   | Polydatin                       | -5.003 | -6.732 | Relatively Low |
| 302 | 5280637   | Luteoloside                     | -6.315 | -6.727 | Relatively Low |
| 303 | 45033634  | Rhapontigenin<br>3'-O-glucoside | -6.621 | -6.727 | Relatively Low |
| 304 | 107905    | Epicatechin gallate             | -6.346 | -6.727 | Relatively Low |
| 305 | 21723007  | Isosilybin                      | -7.142 | -6.716 | Relatively Low |
| 306 | 60208888  | Rebaudioside C                  | -7.678 | -6.712 | Relatively Low |
| 307 | 10772     | Coixol                          | -6.627 | -6.708 | Relatively Low |
| 308 | 5280960   | Naringenin chalcone             | -6.829 | -6.703 | Relatively Low |
| 309 | 3001497   | Geraniin                        | -5.114 | -6.701 | Relatively Low |
| 310 | 91618002  | Asiaticoside B                  | -5.883 | -6.699 | Relatively Low |
| 311 | 21599924  | Ginsenoside Rg2                 | -4.491 | -6.693 | Relatively Low |
| 312 | 138112434 | Procyanidin A1                  | -8.068 | -6.693 | Relatively Low |

|     |           |                                                              |        |        |                |
|-----|-----------|--------------------------------------------------------------|--------|--------|----------------|
| 313 | 21631098  | Mudanpioside C                                               | -8.225 | -6.686 | Relatively Low |
| 314 | 442431    | Narirutin                                                    | -8.226 | -6.681 | Relatively Low |
| 315 | 5281788   | Plantamajoside                                               | -7.872 | -6.681 | Relatively Low |
| 316 | 70680623  | Alpha-Solamarine                                             | -5.633 | -6.68  | Relatively Low |
| 317 | 65064     | Epigallocatechin gallate                                     | -7.367 | -6.673 | Relatively Low |
| 318 | 5318997   | Icariin                                                      | -7.251 | -6.671 | Relatively Low |
| 319 | 24721031  | Jujuboside B                                                 | -4.187 | -6.662 | Relatively Low |
| 320 | 101672279 | Anemarrhenasaponin I                                         | -6.274 | -6.644 | Relatively Low |
| 321 | 11622076  | Hederacolchiside A1                                          | -7.541 | -6.643 | Relatively Low |
| 322 | 134715175 | Kudinoside D                                                 | -4.853 | -6.637 | Relatively Low |
| 323 | 91973815  | Soyasaponin Ba                                               | -5.108 | -6.63  | Relatively Low |
| 324 | 442731    | Chrysophanol-8-O-beta-D-glucopyranoside                      | -5.77  | -6.628 | Relatively Low |
| 325 | 137796330 | 5,6,7,40-tetrahydroxyisoflavone-6,7-di-O-β-D-glucopyranoside | -5.505 | -6.626 | Relatively Low |
| 326 | 60148697  | Isoastragaloside I                                           | -5.539 | -6.624 | Relatively Low |
| 327 | 9917980   | Secoisolariciresinol Diglucoside                             | -7.736 | -6.624 | Relatively Low |
| 328 | 5315244   | Gaultherin                                                   | -7.13  | -6.622 | Relatively Low |
| 329 | 9894584   | Naringin dihydrochalcone                                     | -6.776 | -6.622 | Relatively Low |
| 330 | 9876264   | Bacopaside II                                                | -6.173 | -6.618 | Relatively Low |



|     |           |                                                    |        |        |                |
|-----|-----------|----------------------------------------------------|--------|--------|----------------|
| 331 | 165901    | Higenamine<br>hydrochloride                        | -7.624 | -6.618 | Relatively Low |
| 332 | 114840    | Higenamine<br>Saponin C, from                      | -7.624 | -6.618 | Relatively Low |
| 333 | 11007422  | Liriope<br>muscari                                 | -4.297 | -6.614 | Relatively Low |
| 334 | 442665    | Violanthin                                         | -7.278 | -6.61  | Relatively Low |
| 335 | 5280704   | Apigetrin                                          | -6.341 | -6.609 | Relatively Low |
| 336 | 5319484   | Apigenin-7-O-glucuroni<br>de                       | -6.736 | -6.608 | Relatively Low |
| 337 | 6453452   | Engeletin                                          | -5.617 | -6.607 | Relatively Low |
| 338 | 101887367 | Pseudoginsenoside Rh2                              | -5.39  | -6.606 | Relatively Low |
| 339 | 174742    | Raddeanin A                                        | -5.022 | -6.606 | Relatively Low |
| 340 | 267250    | Dihydrocucurbitacin B<br>5,7,3'-Trihydroxy-6,4',5' | -6.178 | -6.603 | Relatively Low |
| 341 | 5496475   | -<br>trimethoxyflavone                             | -6.912 | -6.602 | Relatively Low |
| 342 | 10320370  | Rosarin                                            | -6.959 | -6.601 | Relatively Low |
| 343 | 442658    | Schaftoside                                        | -7.67  | -6.595 | Relatively Low |
| 344 | 10343508  | Rhein-8-glucoside                                  | -6.717 | -6.594 | Relatively Low |
| 345 | 148124    | Docetaxel                                          | -4.931 | -6.594 | Relatively Low |
| 346 | 73253     | heraclenol                                         | -6.74  | -6.591 | Relatively Low |
| 347 | 5281807   | Puerarin<br>Acetyl                                 | -5.919 | -6.587 | Relatively Low |
| 348 | 131844296 | Perisesaccharide C                                 | -4.113 | -6.586 | Relatively Low |
| 349 | 5481645   | Triptonine B                                       | -3.569 | -6.581 | Relatively Low |

|     |           |                                          |        |        |                |
|-----|-----------|------------------------------------------|--------|--------|----------------|
| 350 | 46887678  | Ginsenoside F3                           | -6.442 | -6.575 | Relatively Low |
| 351 | 6436208   | Cephalomannine                           | -6.002 | -6.573 | Relatively Low |
| 352 | 68247     | Cyanidin chloride                        | -7.093 | -6.567 | Relatively Low |
| 353 | 182251    | oxyimperatorin                           | -6.543 | -6.558 | Relatively Low |
| 354 | 13878151  | Hederoside D2                            | -6.249 | -6.556 | Relatively Low |
| 355 | 5352014   | Isocucurbitacin B                        | -5.218 | -6.554 | Relatively Low |
| 356 | 441921    | Ginsenoside Re                           | -6.259 | -6.545 | Relatively Low |
| 357 | 13991590  | Salvianolic acid C                       | -6.009 | -6.528 | Relatively Low |
| 358 | 21631107  | Benzoyloxypaeoniflorin                   | -7.459 | -6.515 | Relatively Low |
| 359 | 442830    | (-)-Syringaresinol<br>di-O-<br>glucoside | -6.319 | -6.514 | Relatively Low |
| 360 | 10676408  | Parishin C                               | -6.711 | -6.511 | Relatively Low |
| 361 | 5319485   | 3'-MethoxyPuerarin                       | -5.982 | -6.51  | Relatively Low |
| 362 | 5282155   | Kaempferol-3-O-sophor<br>oside           | -7.047 | -6.502 | Relatively Low |
| 363 | 10481797  | Cucurbitacin IIb                         | -5.051 | -6.501 | Relatively Low |
| 364 | 102004835 | Ginsenoside F4                           | -5.715 | -6.5   | Relatively Low |
| 365 | 197081    | Cyanidin-3-glucoside<br>chloride         | -7.596 | -6.499 | Relatively Low |
| 366 | 71312557  | Eleutheroside E                          | -6.295 | -6.493 | Relatively Low |
| 367 | 6443484   | Mulberroside A                           | -6.256 | -6.492 | Relatively Low |
| 368 | 21676217  | Mirificin                                | -6.423 | -6.491 | Relatively Low |
| 369 | 5488307   | Luteolin 7-glucuronide                   | -6.723 | -6.49  | Relatively Low |
| 370 | 45055483  | Vinorelbine Tartrate                     | -7.663 | -6.485 | Relatively Low |
| 371 | 5390854   | Gelsemine                                | -5.443 | -6.475 | Relatively Low |

|     |           |                                                                                                        |        |        |                |
|-----|-----------|--------------------------------------------------------------------------------------------------------|--------|--------|----------------|
| 372 | 5281777   | Iridin                                                                                                 | -6.682 | -6.472 | Relatively Low |
| 373 | 5320644   | Podocarpusflavone A                                                                                    | -7.79  | -6.465 | Relatively Low |
| 374 | 6758      | Rotenone                                                                                               | -4.658 | -6.462 | Relatively Low |
| 375 | 2723635   | D-Glucosamine<br>hydrochloride                                                                         | -6.549 | -6.458 | Relatively Low |
| 376 | 5321954   | Acacetin-7-Glucoside                                                                                   | -5.711 | -6.457 | Relatively Low |
| 377 | 441381    | Saponarin                                                                                              | -7.845 | -6.456 | Relatively Low |
| 378 | 102004868 | Ophiogenin 3-O- $\alpha$ -L-<br>rhamnopyranosyl-(1 $\rightarrow$ 2<br>) $\beta$ -D-<br>glucopyranoside | -6.987 | -6.453 | Relatively Low |
| 379 | 3084961   | Wogonoside                                                                                             | -6.827 | -6.441 | Relatively Low |
| 380 | 6441498   | Lithospermic acid                                                                                      | -6.149 | -6.44  | Relatively Low |
| 381 | 159861    | Gracillin                                                                                              | -6.116 | -6.432 | Relatively Low |
| 382 | 5318761   | Kaempferol-3-O-<br>glucorhamnoside                                                                     | -7.364 | -6.428 | Relatively Low |
| 383 | 101834999 | Carboxyatractyloside                                                                                   | -5.771 | -6.426 | Relatively Low |
| 384 | 21599925  | Notoginsenoside R2                                                                                     | -6.543 | -6.424 | Relatively Low |
| 385 | 667639    | Piceatannol                                                                                            | -7.036 | -6.423 | Relatively Low |
| 386 | 5490351   | Kakkalide                                                                                              | -7.514 | -6.422 | Relatively Low |
| 387 | 5281792   | Rosmarinic acid                                                                                        | -5.873 | -6.416 | Relatively Low |
| 388 | 5318569   | Isoginkgetin                                                                                           | -7.706 | -6.411 | Relatively Low |
| 389 | 3068143   | Emetine<br>Dihydrochloride                                                                             | -5.352 | -6.403 | Relatively Low |
| 390 | 5281654   | Isorhamnetin                                                                                           | -6.88  | -6.403 | Relatively Low |
| 391 | 161557    | Dihydromyricetin                                                                                       | -6.789 | -6.399 | Relatively Low |

|     |          |                                  |        |        |                |
|-----|----------|----------------------------------|--------|--------|----------------|
| 392 | 107957   | Catechin hydrate                 | -6.947 | -6.396 | Relatively Low |
| 393 | 90477999 | Ophiopojaponin C                 | -5.361 | -6.395 | Relatively Low |
| 394 | 161409   | Columbianetin acetate            | -6.212 | -6.395 | Relatively Low |
| 395 | 114776   | Homoorientin                     | -7.097 | -6.395 | Relatively Low |
| 396 | 9854073  | Cabazitaxel                      | -5.435 | -6.394 | Relatively Low |
| 397 | 65084    | (+)-Galocatechin                 | -6.375 | -6.393 | Relatively Low |
| 398 | 6603320  | Emetine Hydrochloride            | -6.5   | -6.393 | Relatively Low |
| 399 | 9064     | Catechin                         | -6.945 | -6.392 | Relatively Low |
| 400 | 91884878 | Picfeltarraenin IA               | -4.414 | -6.383 | Relatively Low |
| 401 | 25115189 | Camelliaside A                   | -8.514 | -6.378 | Relatively Low |
| 402 | 5272653  | 7,3',4'-Tri-O-methyl<br>lutellin | -6.882 | -6.376 | Relatively Low |
| 403 | 11240167 | Pseudoprotogracillin             | -7.505 | -6.371 | Relatively Low |
| 404 | 185914   | Dihydroresveratrol               | -7.571 | -6.367 | Relatively Low |
| 405 | 324796   | Homoarbutin                      | -5.828 | -6.364 | Relatively Low |
| 406 | 441922   | Ginsenoside Rf                   | -6.389 | -6.361 | Relatively Low |
| 407 | 70702337 | Glucotropaeolin                  | -7.217 | -6.36  | Relatively Low |
| 408 | 21591681 | Rebaudioside G                   | -7.019 | -6.36  | Relatively Low |
| 409 | 5281222  | butein                           | -6.631 | -6.358 | Relatively Low |
| 410 | 11550001 | Ginsenoside Rg5                  | -5.431 | -6.357 | Relatively Low |
| 411 | 3133561  | 12-epinapelline                  | -5.417 | -6.344 | Relatively Low |
| 412 | 9849283  | Picroside II                     | -5.975 | -6.34  | Relatively Low |
| 413 | 14162695 | Scutellarin methyl<br>ester      | -6     | -6.339 | Relatively Low |
| 414 | 6474640  | 1,5-Dicaffeoylquinic<br>acid     | -6.713 | -6.337 | Relatively Low |

|     |          |                              |        |        |                |
|-----|----------|------------------------------|--------|--------|----------------|
| 415 | 157631   | Tinnevellin glucoside        | -5.805 | -6.336 | Relatively Low |
| 416 | 5281670  | Morin                        | -8.236 | -6.327 | Relatively Low |
| 417 | 5320954  | Rhapontigenin                | -6.083 | -6.317 | Relatively Low |
| 418 | 162350   | Isovitexin                   | -7.215 | -6.317 | Relatively Low |
| 419 | 5318865  | Kukoamine A                  | -8.567 | -6.316 | Relatively Low |
| 420 | 5318083  | Homoplantaginin              | -6.665 | -6.314 | Relatively Low |
| 421 | 71306914 | Timosaponin A3               | -7.195 | -6.312 | Relatively Low |
| 422 | 21573759 | Khasianine                   | -4.897 | -6.31  | Relatively Low |
| 423 | 10571940 | Zeylenone                    | -7.049 | -6.309 | Relatively Low |
| 424 | 5318882  | Kurarinone                   | -7.969 | -6.308 | Relatively Low |
| 425 | 51346141 | Albiflorin                   | -5.721 | -6.307 | Relatively Low |
| 426 | 44584555 | Gypenoside XVII              | -6.755 | -6.307 | Relatively Low |
| 427 | 5481958  | Mulberrin                    | -8.037 | -6.301 | Relatively Low |
| 428 | 241902   | Vinblastine sulfate          | -4.48  | -6.299 | Relatively Low |
| 429 | 119247   | Solasonine                   | -5.173 | -6.293 | Relatively Low |
| 430 | 155094   | 6-Prenylnaringenin           | -8.033 | -6.292 | Relatively Low |
| 431 | 164648   | Androsin                     | -6.378 | -6.29  | Relatively Low |
| 432 | 14778357 | Rhodiolin                    | -6.13  | -6.29  | Relatively Low |
| 433 | 10794070 | Gambogenic acid              | -5.871 | -6.287 | Relatively Low |
| 434 | 71307082 | Typhaneoside                 | -7.847 | -6.283 | Relatively Low |
| 435 | 5280863  | Kaempferol                   | -8.455 | -6.283 | Relatively Low |
| 436 | 445154   | Resveratrol                  | -7.336 | -6.28  | Relatively Low |
| 437 | 10079497 | Araloside A                  | -5.126 | -6.278 | Relatively Low |
| 438 | 5320227  | Notopterol                   | -6.798 | -6.278 | Relatively Low |
| 439 | 5384799  | Ochnaflavone 4'-methyl ether | -7.485 | -6.273 | Relatively Low |

|     |           |                              |        |        |                |
|-----|-----------|------------------------------|--------|--------|----------------|
| 440 | 92044472  | Rehmannioside D              | -7.289 | -6.265 | Relatively Low |
| 441 | 637213    | Rhapontin                    | -5.97  | -6.265 | Relatively Low |
| 442 | 5280633   | 5-Caffeoylquinic acid        | -6.584 | -6.264 | Relatively Low |
| 443 | 51346122  | Astragaloside I              | -5.127 | -6.262 | Relatively Low |
| 444 | 11228694  | Cornuside                    | -6.858 | -6.261 | Relatively Low |
| 445 | 53486204  | Lobetyolin                   | -7.056 | -6.255 | Relatively Low |
| 446 | 114829    | Liquiritigenin               | -8.717 | -6.254 | Relatively Low |
| 447 | 5748205   | 3'-hydroxyPuerarin           | -5.814 | -6.253 | Relatively Low |
| 448 | 68079     | Isopimpinellin               | -5.643 | -6.251 | Relatively Low |
| 449 | 5281712   | Astringin                    | -6.354 | -6.25  | Relatively Low |
| 450 | 5282151   | 2"-Rhamnosylvitexin          | -6.525 | -6.244 | Relatively Low |
| 451 | 132993930 | Iristectorin A               | -6.177 | -6.239 | Relatively Low |
| 452 | 5464078   | Gamma-mangostin              | -6.169 | -6.239 | Relatively Low |
| 453 | 9798666   | Cryptochlorogenic acid       | -6.044 | -6.238 | Relatively Low |
| 454 | 160544    | Oxypeucedanin                | -6.132 | -6.236 | Relatively Low |
| 455 | 155692    | Spinosin                     | -6.658 | -6.231 | Relatively Low |
| 456 | 158845    | Curculigoside                | -6.057 | -6.231 | Relatively Low |
| 457 | 135398635 | Guanosine                    | -6.967 | -6.224 | Relatively Low |
| 458 | 486614    | Pinoresinol<br>4-O-glucoside | -6.639 | -6.223 | Relatively Low |
| 459 | 17536     | Oxypeucedanin<br>hydrate     | -6.857 | -6.221 | Relatively Low |
| 460 | 4825      | Pimpinellin                  | -5.677 | -6.219 | Relatively Low |
| 461 | 5280343   | Quercetin                    | -6.137 | -6.219 | Relatively Low |
| 462 | 12896796  | Helicide                     | -6.504 | -6.217 | Relatively Low |
| 463 | 5284452   | Quercetin Dihydrate          | -6.16  | -6.217 | Relatively Low |

|     |           |                                      |        |        |                |
|-----|-----------|--------------------------------------|--------|--------|----------------|
| 464 | 72956     | Yadanzioside A                       | -6.236 | -6.213 | Relatively Low |
| 465 | 313325    | Aloin(mixture of A&B)                | -5.858 | -6.212 | Relatively Low |
| 466 | 14982     | Glycyrrhizic acid                    | -5.107 | -6.212 | Relatively Low |
| 467 | 62074     | Monoammonium glycyrrhizinate         | -5.107 | -6.212 | Relatively Low |
| 468 | 656852    | Dipotassium Glycyrrhizinate          | -5.107 | -6.212 | Relatively Low |
| 469 | 9915886   | Thiocolchicoside                     | -5.886 | -6.21  | Relatively Low |
| 470 | 439538    | Xylobiose                            | -6.674 | -6.207 | Relatively Low |
| 471 | 91873341  | Xylotriose                           | -6.664 | -6.206 | Relatively Low |
| 472 | 6452133   | Glucovanillin                        | -5.897 | -6.206 | Relatively Low |
| 473 | 5281319   | Cucurbitacin E                       | -5.423 | -6.205 | Relatively Low |
| 474 | 69634125  | Forsythoside E                       | -6.91  | -6.205 | Relatively Low |
| 475 | 5282166   | Baimaside                            | -8.025 | -6.205 | Relatively Low |
| 476 | 11499198  | Ginsenoside RK1                      | -5.885 | -6.204 | Relatively Low |
| 477 | 53461957  | Isomucronulatol 7-O-glucoside        | -6.72  | -6.204 | Relatively Low |
| 478 | 5281769   | 1,3-Dicaffeoylquinic acid            | -5.603 | -6.204 | Relatively Low |
| 479 | 102185205 | 3-O-β-D-Glucopyranosylplatycodigenin | -5.186 | -6.201 | Relatively Low |
| 480 | 3083909   | Chimonanthine                        | -5.339 | -6.198 | Relatively Low |
| 481 | 5492406   | Complanatuside                       | -7.836 | -6.192 | Relatively Low |
| 482 | 5315459   | Bilobetin                            | -7.451 | -6.189 | Relatively Low |

|     |           |                                                  |        |        |                |
|-----|-----------|--------------------------------------------------|--------|--------|----------------|
| 483 | 137796406 | Cimifugin 4'-O- $\beta$ -D-glucopyranoside       | -6.115 | -6.185 | Relatively Low |
| 484 | 14355298  | Ormosin VI                                       | -6.538 | -6.181 | Relatively Low |
| 485 | 5282102   | Astragalin                                       | -7.954 | -6.181 | Relatively Low |
| 486 | 5748601   | Quercetin 7-rhamnoside                           | -6.075 | -6.178 | Relatively Low |
| 487 | 29435     | 1-Deoxynojirimycin                               | -6.532 | -6.176 | Relatively Low |
| 488 | 969516    | Curcumin                                         | -8.044 | -6.173 | Relatively Low |
| 489 | 5495926   | Garcinone D                                      | -5.542 | -6.172 | Relatively Low |
| 490 | 71905     | Olaquinox                                        | -6.518 | -6.169 | Relatively Low |
| 491 | 24721355  | Taxifolin 7-rhamnoside                           | -6.65  | -6.169 | Relatively Low |
| 492 | 21633075  | Pseudoginsenoside RT5                            | -5.426 | -6.165 | Relatively Low |
| 493 | 134715181 | 6'-O-Cinnamoyl harpagide                         | -7.279 | -6.155 | Relatively Low |
| 494 | 24721561  | Ginsenoside Rd                                   | -8.019 | -6.154 | Relatively Low |
| 495 | 74315890  | Uvarigranol C                                    | -6.705 | -6.154 | Relatively Low |
| 496 | 442813    | Ononin                                           | -5.665 | -6.152 | Relatively Low |
| 497 | 92201     | columbianetin                                    | -6.871 | -6.151 | Relatively Low |
| 498 | 164722    | Hamaudol                                         | -6.245 | -6.148 | Relatively Low |
| 499 | 13347321  | (5R)-trans-1,7-diphenyl-5-hydroxy-6-hepten-3-one | -6.621 | -6.142 | Relatively Low |
| 500 | 12305761  | Aloin A                                          | -7.09  | -6.141 | Relatively Low |
| 501 | 12575     | isovanillic acid                                 | -5.697 | -6.14  | Relatively Low |
| 502 | 21630160  | Liriopesides B                                   | -5.755 | -6.134 | Relatively Low |



|     |           |                            |        |        |                |
|-----|-----------|----------------------------|--------|--------|----------------|
| 503 | 458010    | heraclenin                 | -6.258 | -6.131 | Relatively Low |
| 504 | 5481663   | Narcissoside               | -7.743 | -6.129 | Relatively Low |
| 505 | 11068834  | Octahydrocurcumin          | -7.463 | -6.128 | Relatively Low |
| 506 | 102393334 | Isoastragaloside IV        | -4.371 | -6.127 | Relatively Low |
| 507 | 6325127   | Ajugol                     | -6.167 | -6.125 | Relatively Low |
| 508 | 130796    | Picrocrocin                | -5.454 | -6.125 | Relatively Low |
| 509 | 144883010 | Isocoptisine acetate       | -4.369 | -6.125 | Relatively Low |
| 510 | 44584241  | Hamamelitannin             | -5.945 | -6.122 | Relatively Low |
| 511 | 11169063  | Polygalaxanthone III       | -7.16  | -6.121 | Relatively Low |
| 512 | 135413566 | Vicine                     | -6.741 | -6.119 | Relatively Low |
| 513 | 25056407  | Corylifol A                | -6.167 | -6.116 | Relatively Low |
| 514 | 6326020   | Sibiricose A5              | -6.876 | -6.115 | Relatively Low |
| 515 | 5461026   | Manninotriose              | -7.614 | -6.11  | Relatively Low |
| 516 | 100528    | Arctiin                    | -5.948 | -6.109 | Relatively Low |
| 517 | 5281627   | Hinokiflavone              | -7.621 | -6.106 | Relatively Low |
| 518 | 78384985  | Glucosylgentiopicroside    | -6.629 | -6.102 | Relatively Low |
| 519 | 10228095  | 6"-O-Acetylglycitin        | -7.095 | -6.101 | Relatively Low |
| 520 | 10478277  | Sec-O-glucosylhamaudo<br>l | -6.344 | -6.1   | Relatively Low |
| 521 | 14987     | Lysergol                   | -5.809 | -6.1   | Relatively Low |
| 522 | 114778    | Kahweol                    | -5.062 | -6.095 | Relatively Low |
| 523 | 101601989 | Xylotetrose                | -6.908 | -6.091 | Relatively Low |
| 524 | 166775    | Nystose                    | -6.846 | -6.088 | Relatively Low |
| 525 | 5281426   | 7-Hydroxycoumarin          | -5.596 | -6.088 | Relatively Low |
| 526 | 21626477  | Rhodionin                  | -5.543 | -6.086 | Relatively Low |
| 527 | 133561686 | Uvarigranol B              | -5.574 | -6.08  | Relatively Low |

|     |           |                                                                                              |        |        |                |
|-----|-----------|----------------------------------------------------------------------------------------------|--------|--------|----------------|
| 528 | 133561674 | Nuezhenidic acid                                                                             | -5.333 | -6.08  | Relatively Low |
| 529 | 5281696   | Sciadopitysin                                                                                | -7.585 | -6.079 | Relatively Low |
| 530 | 5281674   | Norwogonin                                                                                   | -7.095 | -6.078 | Relatively Low |
| 531 | 46173858  | Lirioproliside B                                                                             | -6.332 | -6.077 | Relatively Low |
| 532 | 124025    | Procyanidin A2                                                                               | -6.119 | -6.076 | Relatively Low |
| 533 | 7121      | Veratric acid                                                                                | -5.759 | -6.074 | Relatively Low |
| 534 | 75231     | 4-Methoxysalicylic acid                                                                      | -5.333 | -6.072 | Relatively Low |
| 535 | 115149    | Amarogentin                                                                                  | -7.659 | -6.072 | Relatively Low |
| 536 | 122213508 | Ilexsaponin B1                                                                               | -5.307 | -6.067 | Relatively Low |
| 537 | 5281239   | Fucoxanthin                                                                                  | -4.606 | -6.066 | Relatively Low |
| 538 | 71307080  | Picroside I                                                                                  | -5.033 | -6.06  | Relatively Low |
| 539 | 102041439 | Periplogenin 3-[O- $\beta$ -glucopyranosyl-(1 $\rightarrow$ 4)- $\beta$ -sarmentopyranoside] | -4.921 | -6.057 | Relatively Low |
| 540 | 6438919   | Salviaflaside                                                                                | -5.736 | -6.057 | Relatively Low |
| 541 | 441764    | Silychristin                                                                                 | -5.84  | -6.055 | Relatively Low |
| 542 | 6442433   | Isoliquiritin apioside                                                                       | -6.099 | -6.055 | Relatively Low |
| 543 | 101553595 | Ginkgolide K                                                                                 | -4.055 | -6.053 | Relatively Low |
| 544 | 21576180  | Apigenin 6-C- $\alpha$ -L-arabinopyranosyl-8-C- $\beta$ -D-xylopyranoside                    | -7.31  | -6.052 | Relatively Low |
| 545 | 439514    | Scopolin                                                                                     | -6.074 | -6.051 | Relatively Low |
| 546 | 5318987   | 2"-O-rhamnosyl                                                                               | -6.922 | -6.047 | Relatively Low |

|     |           |                                              |        |        |                |
|-----|-----------|----------------------------------------------|--------|--------|----------------|
|     |           | icariside II                                 |        |        |                |
| 547 | 5281614   | Fisetin                                      | -6.401 | -6.045 | Relatively Low |
| 548 | 12889143  | (18 $\beta$ ,20 $\alpha$ )-Glycyrrhizic acid | -5.086 | -6.044 | Relatively Low |
| 549 | 5281810   | Tectoridin                                   | -7.256 | -6.039 | Relatively Low |
| 550 | 199472    | Gallocatechin gallate                        | -8.313 | -6.039 | Relatively Low |
| 551 | 5494868   | Sotetsuflavone                               | -7.317 | -6.036 | Relatively Low |
| 552 | 6324923   | Chrysophanol<br>1-glucoside                  | -7.168 | -6.03  | Relatively Low |
| 553 | 5320826   | Quercetagitrin                               | -6.418 | -6.03  | Relatively Low |
| 554 | 16088242  | CiMigenol 3-beta-D-xylopyranoside            | -4.422 | -6.028 | Relatively Low |
| 555 | 5318267   | calycosin-7-O-beta-D-glucoside               | -5.929 | -6.027 | Relatively Low |
| 556 | 122850    | Dihydrokaempferol                            | -8.299 | -6.026 | Relatively Low |
| 557 | 101422758 | Isoviolanthin                                | -7.869 | -6.026 | Relatively Low |
| 558 | 11349817  | Licoflavone B                                | -6.29  | -6.021 | Relatively Low |
| 559 | 99649     | Emodin-8-glucoside                           | -7.388 | -6.021 | Relatively Low |
| 560 | 73384     | Brazilin                                     | -6.886 | -6.018 | Relatively Low |
| 561 | 10212     | Imperatorin                                  | -6.367 | -6.016 | Relatively Low |
| 562 | 5318517   | Andrographolide                              | -4.742 | -6.011 | Relatively Low |
| 563 | 44257354  | Iristectorin B                               | -6.405 | -6.008 | Relatively Low |
| 564 | 10994544  | Fabiatrin                                    | -7.089 | -6.007 | Relatively Low |
| 565 | 9918692   | Ginsenoside F2                               | -4.997 | -6.007 | Relatively Low |
| 566 | 439533    | Taxifolin                                    | -7.306 | -6.007 | Relatively Low |
| 567 | 821347    | Dehydronuciferin                             | -6.036 | -6.005 | Relatively Low |

|     |           |                              |        |        |                |
|-----|-----------|------------------------------|--------|--------|----------------|
| 568 | 21631106  | Benzoylpaeoniflorin          | -7.464 | -6.002 | Relatively Low |
| 569 | 24832659  | Benzoylmesaconine            | -4.68  | -6.002 | Relatively Low |
| 570 | 10146     | Nuciferine                   | -6.747 | -6.002 | Relatively Low |
| 571 | 5317764   | Glycyrrhisoflavone           | -6.695 | -6.001 | Relatively Low |
| 572 | 6441913   | Coniferyl ferulate           | -7.533 | -6.001 | Relatively Low |
| 573 | 5281717   | Oxyresveratrol               | -8.267 | -5.997 | Relatively Low |
| 574 | 64982     | Baicalin                     | -6.273 | -5.997 | Relatively Low |
| 575 | 5281601   | 7,4'<br>-Di-O-methylapigenin | -6.256 | -5.996 | Relatively Low |
| 576 | 24721571  | Phillyrin                    | -6.192 | -5.991 | Relatively Low |
| 577 | 5320834   | Quercetin<br>3-gentiobioside | -7.69  | -5.988 | Relatively Low |
| 578 | 5280544   | Herbacetin                   | -7.497 | -5.982 | Relatively Low |
| 579 | 92043450  | Hastatoside                  | -5.417 | -5.981 | Relatively Low |
| 580 | 54580480  | 20(R)-Ginsenoside<br>Rh2     | -4.727 | -5.981 | Relatively Low |
| 581 | 44566720  | Leucoside                    | -7.946 | -5.98  | Relatively Low |
| 582 | 31553     | Silybin(Mixture A&B)         | -6.941 | -5.979 | Relatively Low |
| 583 | 5281680   | Quercetagetin                | -6.395 | -5.979 | Relatively Low |
| 584 | 102004659 | Cratoxylone                  | -6.702 | -5.978 | Relatively Low |
| 585 | 5281612   | Diosmetin                    | -5.96  | -5.976 | Relatively Low |
| 586 | 65085     | Crotonoside                  | -7.325 | -5.973 | Relatively Low |
| 587 | 100990912 | Puerarin<br>6"-O-xyloside    | -8.558 | -5.972 | Relatively Low |
| 588 | 97214     | Eupatorin                    | -6.552 | -5.971 | Relatively Low |
| 589 | 9852185   | Gambogic acid                | -4.306 | -5.971 | Relatively Low |

|     |           |                                 |        |        |                |
|-----|-----------|---------------------------------|--------|--------|----------------|
| 590 | 15596617  | 4'-O-Glucosylvitexin            | -7.871 | -5.971 | Relatively Low |
| 591 | 5280537   | N-trans-Feruloyltyramine        | -8.046 | -5.971 | Relatively Low |
| 592 | 73067     | Medicarpin                      | -6.839 | -5.97  | Relatively Low |
| 593 | 129539794 | 5-Ethoxy-10-Gingerol            | -4.611 | -5.968 | Relatively Low |
| 594 | 480764    | 8-Prenylnaringenin              | -8.601 | -5.967 | Relatively Low |
| 595 | 73466     | Monotropein                     | -4.418 | -5.966 | Relatively Low |
| 596 | 5281544   | Oleuropein                      | -4.239 | -5.961 | Relatively Low |
| 597 | 5280457   | Pinosylvin                      | -6.86  | -5.961 | Relatively Low |
| 598 | 10253785  | Luteolin-3'-D-glucuronide       | -8.107 | -5.96  | Relatively Low |
| 599 | 5316673   | Kaempferin                      | -7.254 | -5.959 | Relatively Low |
| 600 | 23874492  | Octopamine,<br>N-p-coumaroyl-   | -6.802 | -5.958 | Relatively Low |
| 601 | 164943    | Lycorine<br>hydrochloride       | -7.071 | -5.957 | Relatively Low |
| 602 | 448779    | (R)- $\alpha$ -Methyltryptamine | -6.744 | -5.952 | Relatively Low |
| 603 | 5317471   | Luteolin-5-O-glucoside          | -7.637 | -5.949 | Relatively Low |
| 604 | 165549    | Sophoridine                     | -6.64  | -5.948 | Relatively Low |
| 605 | 5281764   | Chicoric acid                   | -4.553 | -5.942 | Relatively Low |
| 606 | 56662029  | taccalonolide B                 | -3.908 | -5.941 | Relatively Low |
| 607 | 5320053   | Neobavaisoflavone               | -6.327 | -5.939 | Relatively Low |
| 608 | 65752     | Rutaecarpine                    | -6.351 | -5.938 | Relatively Low |
| 609 | 10865594  | Bacopaside V                    | -5.855 | -5.937 | Relatively Low |
| 610 | 71463728  | Bruceine D                      | -5.222 | -5.936 | Relatively Low |
| 611 | 11968737  | Melittoside                     | -6.03  | -5.932 | Relatively Low |

|     |           |                                           |        |        |                |
|-----|-----------|-------------------------------------------|--------|--------|----------------|
| 612 | 162305    | Aloenin A                                 | -6.425 | -5.927 | Relatively Low |
| 613 | 581676    | Tetrahydropiperine                        | -5.788 | -5.927 | Relatively Low |
| 614 | 10429233  | Dihydrocurcumin                           | -7.874 | -5.926 | Relatively Low |
| 615 | 10795088  | Apigenin-7-O -(2G-rhamnosyl)gentiobioside | -7.455 | -5.914 | Relatively Low |
| 616 | 10095180  | Kaempferol-7-O-beta-D-glucopyranoside     | -5.96  | -5.911 | Relatively Low |
| 617 | 11146840  | Specnuezhenide                            | -7.823 | -5.911 | Relatively Low |
| 618 | 101916326 | 7-O-Methylmangiferin                      | -6.929 | -5.91  | Relatively Low |
| 619 | 8468      | Vanillic acid                             | -5.377 | -5.906 | Relatively Low |
| 620 | 25659     | Nitidine Chloride                         | -6.15  | -5.902 | Relatively Low |
| 621 | 6438568   | Neogambogic acid                          | -5.4   | -5.899 | Relatively Low |
| 622 | 143905847 | Mogroside IIa                             | -6.222 | -5.899 | Relatively Low |
| 623 | 108052    | Cafestol                                  | -4.462 | -5.898 | Relatively Low |
| 624 | 5273755   | Eupatilin                                 | -7.297 | -5.896 | Relatively Low |
| 625 | 638285    | Isopropylidenylacetyl-marmesin            | -6.419 | -5.894 | Relatively Low |
| 626 | 6419835   | Catechin gallate                          | -6.801 | -5.892 | Relatively Low |
| 627 | 114850    | Oxymatrine                                | -5.405 | -5.891 | Relatively Low |
| 628 | 442021    | Brucine                                   | -5.228 | -5.889 | Relatively Low |
| 629 | 442416    | Agnuside                                  | -6.711 | -5.889 | Relatively Low |
| 630 | 14989     | Aloin B                                   | -7.085 | -5.887 | Relatively Low |
| 631 | 442923    | Paeonolide                                | -7.684 | -5.885 | Relatively Low |
| 632 | 12299879  | Atractyloside potassium salt              | -5.068 | -5.885 | Relatively Low |

|     |           |                               |        |        |                |
|-----|-----------|-------------------------------|--------|--------|----------------|
| 633 | 442433    | Feretoside                    | -5.395 | -5.882 | Relatively Low |
| 634 | 11876135  | Dihydrolycorine               | -7.481 | -5.881 | Relatively Low |
| 635 | 452967    | Steviol                       | -5.047 | -5.881 | Relatively Low |
| 636 | 5281673   | Myricetrin                    | -6.285 | -5.881 | Relatively Low |
| 637 | 5281377   | Genistin                      | -6.656 | -5.88  | Relatively Low |
| 638 | 23615629  | Cephaelin<br>Hydrochloride    | -7.343 | -5.875 | Relatively Low |
| 639 | 442195    | Cephaeline                    | -7.341 | -5.875 | Relatively Low |
| 640 | 21670038  | 5-O-methylvisammiosid<br>e    | -6.093 | -5.868 | Relatively Low |
| 641 | 90479257  | Edpetiline                    | -5.817 | -5.868 | Relatively Low |
| 642 | 5770      | Reserpine                     | -4.079 | -5.868 | Relatively Low |
| 643 | 5317284   | Eupafolin                     | -6.417 | -5.868 | Relatively Low |
| 644 | 6436246   | Columbianadin                 | -6.151 | -5.864 | Relatively Low |
| 645 | 102022989 | Heterophyllin B               | -4.269 | -5.863 | Relatively Low |
| 646 | 5320521   | Raspberry ketone<br>glucoside | -6.666 | -5.859 | Relatively Low |
| 647 | 71307571  | Polyphyllin VI                | -7.959 | -5.855 | Relatively Low |
| 648 | 69502     | Alloimperatorin               | -6.151 | -5.855 | Relatively Low |
| 649 | 5281542   | Harpagoside                   | -5.17  | -5.853 | Relatively Low |
| 650 | 6915739   | Linderane                     | -4.716 | -5.851 | Relatively Low |
| 651 | 73467     | Verbenalin                    | -5.588 | -5.851 | Relatively Low |
| 652 | 441071    | Strychnine                    | -6.411 | -5.851 | Relatively Low |
| 653 | 10314695  | Rosiridin                     | -6.332 | -5.848 | Relatively Low |
| 654 | 441685    | Taccalonolide A               | -3.398 | -5.846 | Relatively Low |
| 655 | 5321398   | Sophoricoside                 | -6.11  | -5.844 | Relatively Low |

|     |           |                                                                                                                      |        |        |                |
|-----|-----------|----------------------------------------------------------------------------------------------------------------------|--------|--------|----------------|
| 656 | 5281647   | Mangiferin                                                                                                           | -6.836 | -5.844 | Relatively Low |
| 657 | 72369     | Tripterifordin                                                                                                       | -4.441 | -5.843 | Relatively Low |
| 658 | 5280459   | Quercitrin                                                                                                           | -6.643 | -5.842 | Relatively Low |
| 659 | 2198      | Anisodamine                                                                                                          | -7.121 | -5.841 | Relatively Low |
| 660 | 5273569   | Fraxetin                                                                                                             | -6.217 | -5.841 | Relatively Low |
| 661 | 5429      | Theobromine                                                                                                          | -6.005 | -5.84  | Relatively Low |
| 662 | 5280352   | Bilirubin                                                                                                            | -7.956 | -5.839 | Relatively Low |
| 663 | 11721847  | Anemoside A3                                                                                                         | -6.554 | -5.838 | Relatively Low |
| 664 | 14211225  | Aloeresin D                                                                                                          | -7.653 | -5.836 | Relatively Low |
| 665 | 131801361 | Ganoderenic acid E                                                                                                   | -4.668 | -5.835 | Relatively Low |
| 666 | 72277     | Epigallocatechin                                                                                                     | -6.554 | -5.835 | Relatively Low |
| 667 | 5481882   | Juglalin                                                                                                             | -8.549 | -5.834 | Relatively Low |
| 668 | 5352005   | Quercetin 3,3',4',7-O-tetramethyl ether rel-(8R,8'R)-dimethyl-(7S,7'R)-bis(3,4-methylenedioxyphenyl)tetrahydro-furan | -6.209 | -5.831 | Relatively Low |
| 669 | 234441    | Quercetin 3,3',4',7-O-tetramethyl ether rel-(8R,8'R)-dimethyl-(7S,7'R)-bis(3,4-methylenedioxyphenyl)tetrahydro-furan | -6.715 | -5.829 | Relatively Low |
| 670 | 5311497   | Vinorelbine                                                                                                          | -5.524 | -5.829 | Relatively Low |
| 671 | 162876    | Erigeroside                                                                                                          | -5.918 | -5.828 | Relatively Low |
| 672 | 5280372   | coniferin                                                                                                            | -6.654 | -5.828 | Relatively Low |
| 673 | 91458     | Aucubin                                                                                                              | -6.458 | -5.827 | Relatively Low |
| 674 | 6175      | Cytidine                                                                                                             | -6.003 | -5.826 | Relatively Low |
| 675 | 14163819  | Fuziline                                                                                                             | -4.43  | -5.826 | Relatively Low |
| 676 | 6917970   | L-Stepholidine                                                                                                       | -4.811 | -5.826 | Relatively Low |



|     |           |                                                   |        |        |                |
|-----|-----------|---------------------------------------------------|--------|--------|----------------|
| 677 | 155831    | 10-Deacetyltaxol                                  | -7.233 | -5.825 | Relatively Low |
| 678 | 3084995   | Isoshaftoside                                     | -8.026 | -5.825 | Relatively Low |
| 679 | 5281567   | Methysticin                                       | -6.925 | -5.82  | Relatively Low |
| 680 | 91895489  | Ginsenoside Rg6                                   | -5.577 | -5.818 | Relatively Low |
| 681 | 9840805   | Licochalcone C<br>Kaempferol                      | -5.72  | -5.816 | Relatively Low |
| 682 | 102004842 | 3-sophoroside-7-<br>rhamnoside                    | -7.668 | -5.815 | Relatively Low |
| 683 | 72276     | Epicatechin                                       | -6.965 | -5.811 | Relatively Low |
| 684 | 12302276  | Calycanthoside                                    | -6.327 | -5.808 | Relatively Low |
| 685 | 70700401  | Orcinol glucoside                                 | -6.473 | -5.805 | Relatively Low |
| 686 | 5481982   | Baohuoside II                                     | -7.07  | -5.804 | Relatively Low |
| 687 | 5316606   | Desoxyrhaponticin                                 | -5.971 | -5.802 | Relatively Low |
| 688 | 131900    | Peimine                                           | -4.594 | -5.799 | Relatively Low |
| 689 | 119258    | Astilbin                                          | -7.031 | -5.799 | Relatively Low |
| 690 | 11487078  | Tetramethylcurcumin                               | -6.121 | -5.798 | Relatively Low |
| 691 | 5281675   | Orientin                                          | -6.739 | -5.797 | Relatively Low |
| 692 | 99514     | Isosteviol                                        | -4.069 | -5.793 | Relatively Low |
| 693 | 6440400   | Menisdaurin                                       | -5.445 | -5.792 | Relatively Low |
| 694 | 10155076  | 1-O-Caffeoylquinic<br>acid                        | -6.511 | -5.792 | Relatively Low |
| 695 | 76336194  | Alisol A,24-acetate                               | -3.997 | -5.791 | Relatively Low |
| 696 | 13892722  | Shanzhiside methylester                           | -6.437 | -5.788 | Relatively Low |
| 697 | 392450    | 8-Desoxygartanin                                  | -6.974 | -5.788 | Relatively Low |
| 698 | 5321884   | 2,3,5,4'-Tetrahydroxyl-<br>diphenylethylene-2-O-b | -8.44  | -5.787 | Relatively Low |

|     |           |                                                                   |        |        |                |
|-----|-----------|-------------------------------------------------------------------|--------|--------|----------------|
|     |           | eta-D-<br>glucoside                                               |        |        |                |
| 699 | 162147    | Aloperine                                                         | -5.413 | -5.785 | Relatively Low |
|     |           | Aldehydoisoophiopogon                                             |        |        |                |
| 700 | 10383616  | anone A,<br>6-                                                    | -6.71  | -5.785 | Relatively Low |
| 701 | 115067    | Gastrodin                                                         | -6.753 | -5.784 | Relatively Low |
| 702 | 5280656   | Rosin                                                             | -6.656 | -5.778 | Relatively Low |
| 703 | 155569    | Yunaconitine                                                      | -4.812 | -5.775 | Relatively Low |
| 704 | 5372945   | Paprazine                                                         | -6.822 | -5.774 | Relatively Low |
| 705 | 9809542   | Ginsenoside F1                                                    | -6.537 | -5.773 | Relatively Low |
| 706 | 13966122  | Rosmanol                                                          | -4.929 | -5.771 | Relatively Low |
| 707 | 3037884   | Hirsutine                                                         | -5.566 | -5.771 | Relatively Low |
| 708 | 6890      | Gramine                                                           | -6.498 | -5.765 | Relatively Low |
| 709 | 446495    | Maltotetraose                                                     | -6.846 | -5.757 | Relatively Low |
| 710 | 71307564  | Cyasterone                                                        | -4.948 | -5.755 | Relatively Low |
| 711 | 10163855  | Vincosamide                                                       | -6.38  | -5.752 | Relatively Low |
|     |           | 20(R)-Notoginsenoside<br>R2                                       |        |        |                |
| 712 | 16757287  | (2R,3R)-3,7,4'-Trihydro<br>xy-5-<br>methoxy-8-prenylflavan<br>one | -6.341 | -5.751 | Relatively Low |
| 713 | 122169315 |                                                                   | -8.719 | -5.751 | Relatively Low |
| 714 | 9929189   | Sophoflavescenol                                                  | -7.767 | -5.748 | Relatively Low |
| 715 | 5320496   | Pilloin                                                           | -6.524 | -5.747 | Relatively Low |
| 716 | 3083726   | 8-Hydroxybergapten                                                | -5.765 | -5.746 | Relatively Low |

|     |           |                                              |        |        |                |
|-----|-----------|----------------------------------------------|--------|--------|----------------|
| 717 | 5464452   | Sinomenine<br>hydrochloride                  | -5.823 | -5.746 | Relatively Low |
| 718 | 12127     | Isovanillin                                  | -5.732 | -5.744 | Relatively Low |
| 719 | 14463159  | Periplocin                                   | -6.66  | -5.743 | Relatively Low |
| 720 | 5464170   | irigenin                                     | -6.147 | -5.742 | Relatively Low |
| 721 | 5316860   | Eleutheroside B                              | -8.092 | -5.741 | Relatively Low |
| 722 | 6694      | Rhodamine B                                  | -7.122 | -5.741 | Relatively Low |
| 723 | 5281806   | Psoralidin                                   | -6.471 | -5.741 | Relatively Low |
| 724 | 124219    | Rubimaillin                                  | -6.284 | -5.741 | Relatively Low |
| 725 | 115723    | BETA-Febrifugine                             | -6.957 | -5.74  | Relatively Low |
| 726 | 5281616   | Galangin                                     | -7.178 | -5.739 | Relatively Low |
| 727 | 164619    | D-Pinitol                                    | -6.786 | -5.738 | Relatively Low |
| 728 | 137795177 | 17-Hydroxyisolathyrol                        | -5.588 | -5.735 | Relatively Low |
| 729 | 5318565   | Isofraxidin                                  | -6.099 | -5.735 | Relatively Low |
| 730 | 10246505  | Licoflavone C                                | -7.943 | -5.734 | Relatively Low |
| 731 | 160511    | Abrine                                       | -5.852 | -5.731 | Relatively Low |
| 732 | 808227    | PiperlotineC                                 | -6.561 | -5.731 | Relatively Low |
| 733 | 5318980   | Icaritin                                     | -7.112 | -5.73  | Relatively Low |
| 734 | 513197    | Isoxanthohumol                               | -7.8   | -5.729 | Relatively Low |
| 735 | 6029      | Uridine                                      | -6.385 | -5.726 | Relatively Low |
| 736 | 5316803   | 1,7-Dihydroxy-2,3-<br>methylenedioxyxanthone | -6.882 | -5.726 | Relatively Low |
| 737 | 10748     | Herniarin                                    | -5.635 | -5.722 | Relatively Low |
| 738 | 15223582  | Baicalin methyl ester                        | -5.794 | -5.722 | Relatively Low |
| 739 | 71609288  | Ziyuglycoside I                              | -4.068 | -5.721 | Relatively Low |

|     |          |                                   |        |        |                |
|-----|----------|-----------------------------------|--------|--------|----------------|
| 740 | 5318645  | Isorhamnetin-3-O-beta-D-Glucoside | -6.988 | -5.72  | Relatively Low |
| 741 | 5319333  | Emodin 1-glucoside                | -7.794 | -5.719 | Relatively Low |
| 742 | 20055771 | 14-Benzoylaconine                 | -4.839 | -5.717 | Relatively Low |
| 743 | 5477212  | Solanesol                         | -5.079 | -5.716 | Relatively Low |
| 744 | 69867    | Indole-3-carboxylic acid          | -5.247 | -5.711 | Relatively Low |
| 745 | 6070     | Veratramine                       | -5.769 | -5.711 | Relatively Low |
| 746 | 13820511 | Isorosmanol                       | -6.5   | -5.709 | Relatively Low |
| 747 | 46886723 | Methylphiopogonanone B            | -6.804 | -5.708 | Relatively Low |
| 748 | 68082    | Isobergapten                      | -5.7   | -5.707 | Relatively Low |
| 749 | 127584   | 7-Ethylcamptothecin               | -6.205 | -5.707 | Relatively Low |
| 750 | 24721373 | Rubusoside                        | -5.527 | -5.704 | Relatively Low |
| 751 | 656516   | Amygdalin                         | -6.609 | -5.703 | Relatively Low |
| 752 | 71307451 | atractyloside A                   | -6.835 | -5.699 | Relatively Low |
| 753 | 91973812 | Tenacissoside I                   | -5.415 | -5.697 | Relatively Low |
| 754 | 99693    | Skimmin                           | -6.132 | -5.697 | Relatively Low |
| 755 | 86328677 | Isorhamnetin-3-O-galactoside      | -7.618 | -5.693 | Relatively Low |
| 756 | 72       | Protocatechuic Acid               | -5.599 | -5.691 | Relatively Low |
| 757 | 6508     | Quinic Acid                       | -5.922 | -5.691 | Relatively Low |
| 758 | 6255462  | Resveratrol 4'-methyl ether       | -7.14  | -5.691 | Relatively Low |
| 759 | 107971   | Daidzin                           | -6.567 | -5.69  | Relatively Low |

|     |           |                                                                     |        |        |                |
|-----|-----------|---------------------------------------------------------------------|--------|--------|----------------|
| 760 | 176079    | Calendulose E                                                       | -4.056 | -5.69  | Relatively Low |
| 761 | 10422896  | KinsenosideKinsenoside                                              | -5.732 | -5.686 | Relatively Low |
| 762 | 6917864   | Artesunate                                                          | -4.769 | -5.684 | Relatively Low |
| 763 | 23616873  | Continentalic acid                                                  | -4.52  | -5.681 | Relatively Low |
| 764 | 23872112  | 1-(3,4-dimethoxyphenyl)-2-(4-allyl-2,6-dimethoxyphenoxy)propan-1-ol | -7.265 | -5.678 | Relatively Low |
| 765 | 14135335  | Chrysin 7-glucuronide                                               | -6.052 | -5.678 | Relatively Low |
| 766 | 102594479 | 2"-O-beta-L-galactopyranosylorientin                                | -6.376 | -5.678 | Relatively Low |
| 767 | 21599923  | 20(R)-Ginsenoside Rh1                                               | -5.549 | -5.676 | Relatively Low |
| 768 | 6479915   | Methyl rosmarinate                                                  | -6.386 | -5.676 | Relatively Low |
| 769 | 21588226  | Tenuifolin                                                          | -5.771 | -5.676 | Relatively Low |
| 770 | 146487    | Daphnetin 7-methyl ether                                            | -5.786 | -5.673 | Relatively Low |
| 771 | 5281666   | Kaempferide                                                         | -6.343 | -5.669 | Relatively Low |
| 772 | 5379033   | Dehydrodiisoeugenol                                                 | -6.452 | -5.668 | Relatively Low |
| 773 | 802       | Indole-3-acetic acid                                                | -5.743 | -5.668 | Relatively Low |
| 774 | 5280961   | Genistein                                                           | -7.23  | -5.667 | Relatively Low |
| 775 | 10153     | Corydine                                                            | -6.692 | -5.666 | Relatively Low |
| 776 | 121587    | Galanthamine hydrobromide                                           | -5.731 | -5.665 | Relatively Low |
| 777 | 13844274  | Schizanthrin E                                                      | -5.028 | -5.66  | Relatively Low |
| 778 | 72767078  | Eupalinilide B                                                      | -5.036 | -5.651 | Relatively Low |

|     |           |                                |        |        |                |
|-----|-----------|--------------------------------|--------|--------|----------------|
| 779 | 5351344   | Combretastatin A4              | -6.246 | -5.647 | Relatively Low |
| 780 | 23682211  | Sinigrin                       | -5.138 | -5.645 | Relatively Low |
| 781 | 10076238  | Liquiritin apioside            | -5.954 | -5.644 | Relatively Low |
| 782 | 160500    | Corytuberine                   | -6.322 | -5.644 | Relatively Low |
| 783 | 4970      | Protopine                      | -5.075 | -5.641 | Relatively Low |
| 784 | 122826    | Aaptamine                      | -5.189 | -5.638 | Relatively Low |
| 785 | 101688189 | Cistanoside F                  | -6.672 | -5.637 | Relatively Low |
| 786 | 1548943   | Capsaicin                      | -5.702 | -5.637 | Relatively Low |
| 787 | 5481968   | Morusinol                      | -6.348 | -5.636 | Relatively Low |
| 788 | 96710     | Aristololactam                 | -5.7   | -5.636 | Relatively Low |
| 789 | 5354284   | 5,7-Dihydroxy-4-methylcoumarin | -6.815 | -5.635 | Relatively Low |
| 790 | 94160     | Mitraphylline                  | -6.929 | -5.635 | Relatively Low |
| 791 | 8417      | Scoparone                      | -5.684 | -5.634 | Relatively Low |
| 792 | 71621984  | 4"-methyloxy-Genistin          | -5.524 | -5.632 | Relatively Low |
| 793 | 91884885  | Ganoderenic acid D             | -4.206 | -5.63  | Relatively Low |
| 794 | 15558620  | Alisol B                       | -4.376 | -5.627 | Relatively Low |
| 795 | 5281780   | 3,4-Dicaffeoylquinic acid      | -4.633 | -5.625 | Relatively Low |
| 796 | 5280460   | Scopoletin                     | -5.917 | -5.623 | Relatively Low |
| 797 | 13606036  | Agarotetrol                    | -7.146 | -5.622 | Relatively Low |
| 798 | 197173    | Monocrotaline N-Oxide          | -5.252 | -5.619 | Relatively Low |
| 799 | 134715174 | Gambogellic acid               | -5.118 | -5.616 | Relatively Low |
| 800 | 6253      | Arabinocytosine                | -6.12  | -5.616 | Relatively Low |
| 801 | 440735    | Eriodictyol                    | -6.399 | -5.614 | Relatively Low |

|     |           |                                                |        |        |                |
|-----|-----------|------------------------------------------------|--------|--------|----------------|
| 802 | 5280373   | Biochanin A                                    | -7.006 | -5.613 | Relatively Low |
| 803 | 122196267 | Isoginsenoside Rh3                             | -5.276 | -5.61  | Relatively Low |
| 804 | 21626375  | Gypsogenin 3-O- $\beta$ -D-glucuronopyranoside | -4.325 | -5.61  | Relatively Low |
| 805 | 5318581   | Isokurarinone                                  | -6.393 | -5.609 | Relatively Low |
| 806 | 11018329  | Polyphyllin I                                  | -6.719 | -5.609 | Relatively Low |
| 807 | 5281708   | Daidzein                                       | -7.173 | -5.607 | Relatively Low |
| 808 | 5392245   | Calycanthine                                   | -5.634 | -5.607 | Relatively Low |
| 809 | 54682930  | 4-Hydroxycoumarin                              | -5.292 | -5.604 | Relatively Low |
| 810 | 125181686 | Rhmannioside C                                 | -6.631 | -5.602 | Relatively Low |
| 811 | 5281608   | Chrysosplenetin B                              | -6.582 | -5.602 | Relatively Low |
| 812 | 14539911  | Norisoboldine                                  | -6.906 | -5.602 | Relatively Low |
| 813 | 11425923  | 15,16-Dihydrotanshinone I                      | -5.953 | -5.601 | Relatively Low |
| 814 | 5473050   | Pinostilbene                                   | -7.617 | -5.598 | Relatively Low |
| 815 | 3082301   | Genipin 1-gentiobioside                        | -6.936 | -5.597 | Relatively Low |
| 816 | 5488822   | Baohuoside I                                   | -5.862 | -5.594 | Relatively Low |
| 817 | 10865257  | Acetylcimigenol arabinoside                    | -4.477 | -5.593 | Relatively Low |
| 818 | 23616879  | Veratrosine                                    | -7.449 | -5.591 | Relatively Low |
| 819 | 442534    | Paeoniflorin                                   | -6.394 | -5.59  | Relatively Low |
| 820 | 91973797  | Parishin E                                     | -6.253 | -5.586 | Relatively Low |
| 821 | 101686456 | Toringin                                       | -6.909 | -5.586 | Relatively Low |
| 822 | 71490387  | Epoxylicheliolide                              | -5.856 | -5.585 | Relatively Low |
| 823 | 174003    | Pinoresinol diglucoside                        | -7.366 | -5.579 | Relatively Low |
| 824 | 6293081   | Flavokawain C                                  | -6.232 | -5.576 | Relatively Low |

|     |          |                                                    |        |        |                |
|-----|----------|----------------------------------------------------|--------|--------|----------------|
| 825 | 11968867 | Asperulosidic acid                                 | -6.16  | -5.575 | Relatively Low |
| 826 | 442514   | Hematoxylin                                        | -6.569 | -5.573 | Relatively Low |
| 827 | 765514   | 1-Cinnamoylpyrrolidine                             | -6.458 | -5.572 | Relatively Low |
| 828 | 5491408  | Myricetin<br>3-O-galactoside                       | -6.778 | -5.572 | Relatively Low |
| 829 | 64981    | Arctigenin                                         | -7.12  | -5.571 | Relatively Low |
| 830 | 15294091 | Ankaflavin                                         | -6.252 | -5.57  | Relatively Low |
| 831 | 71621987 | Daidzein<br>7-O-beta-D-glucoside<br>4"-O-methylate | -6.276 | -5.57  | Relatively Low |
| 832 | 5889042  | 4-Hydroxylonchocarpin                              | -5.348 | -5.57  | Relatively Low |
| 833 | 15736732 | Kirenol                                            | -5.444 | -5.569 | Relatively Low |
| 834 | 476537   | Ecliptasaponin A                                   | -5.038 | -5.567 | Relatively Low |
| 835 | 25149302 | Perisesaccharide B                                 | -5.143 | -5.565 | Relatively Low |
| 836 | 66065    | Bergenin                                           | -5.226 | -5.564 | Relatively Low |
| 837 | 14034912 | Prim-O-glucosylcimifugin                           | -6.992 | -5.562 | Relatively Low |
| 838 | 104842   | 7-Ethyl-10-Hydroxycamptothecin                     | -6.463 | -5.56  | Relatively Low |
| 839 | 10658    | Angelicin                                          | -5.825 | -5.559 | Relatively Low |
| 840 | 9548634  | Glucoraphanin                                      | -5.678 | -5.559 | Relatively Low |
| 841 | 13844298 | Chicanin                                           | -6.388 | -5.558 | Relatively Low |
| 842 | 5281343  | 5,7-Dihydroxychromone                              | -5.96  | -5.558 | Relatively Low |
| 843 | 5318999  | Licochalcone B                                     | -6.516 | -5.558 | Relatively Low |
| 844 | 243      | Benzoic acid                                       | -5.207 | -5.557 | Relatively Low |
| 845 | 5356121  | Flavokawain B                                      | -6.481 | -5.555 | Relatively Low |



|     |          |                                     |        |        |                |
|-----|----------|-------------------------------------|--------|--------|----------------|
| 846 | 660      | Dihydrocoumarin                     | -5.318 | -5.554 | Relatively Low |
| 847 | 21630000 | Liriope muscari baily<br>saponins C | -7.149 | -5.554 | Relatively Low |
| 848 | 20839223 | Ginsenoside Rh3                     | -4.329 | -5.553 | Relatively Low |
| 849 | 5281408  | Rhynchophylline                     | -4.226 | -5.553 | Relatively Low |
| 850 | 6477182  | Dimethylcurcumin                    | -6.822 | -5.552 | Relatively Low |
| 851 | 6305     | L-Tryptophan                        | -5.416 | -5.551 | Relatively Low |
| 852 | 5318869  | Kumatakenin                         | -7.778 | -5.55  | Relatively Low |
| 853 | 471005   | Ganoderic Acid H                    | -4.388 | -5.548 | Relatively Low |
| 854 | 9804842  | (-)-EGCG-3"-O-Me                    | -6.681 | -5.547 | Relatively Low |
| 855 | 2214     | Acetovanillone                      | -6.088 | -5.546 | Relatively Low |
| 856 | 5318547  | Isodemethylwedelolactone            | -6.692 | -5.546 | Relatively Low |
| 857 | 11790    | alpha-Naphthoflavone                | -6.36  | -5.543 | Relatively Low |
| 858 | 14019178 | Kajiichigoside F1                   | -3.978 | -5.54  | Relatively Low |
| 859 | 16401086 | 10-hydroxy aconitine                | -4.376 | -5.537 | Relatively Low |
| 860 | 445858   | Ferulic Acid                        | -4.849 | -5.535 | Relatively Low |
| 861 | 5281636  | Gentisin                            | -6.334 | -5.53  | Relatively Low |
| 862 | 36462    | Etoposide                           | -5.937 | -5.529 | Relatively Low |
| 863 | 21599928 | Ginsenoside Rh4                     | -5.097 | -5.525 | Relatively Low |
| 864 | 5280448  | Calycosin                           | -6.708 | -5.523 | Relatively Low |
| 865 | 13846690 | Protosappanin B                     | -6.104 | -5.522 | Relatively Low |
| 866 | 5280804  | Isoquercitrin                       | -7.255 | -5.521 | Relatively Low |
| 867 | 5375252  | Noreugenin                          | -6.272 | -5.52  | Relatively Low |
| 868 | 91144    | Farrerol                            | -6.644 | -5.515 | Relatively Low |
| 869 | 14140130 | Hydroprotopine                      | -6.711 | -5.515 | Relatively Low |

|     |           |                             |        |        |                |
|-----|-----------|-----------------------------|--------|--------|----------------|
| 870 | 5481237   | Kushenol I                  | -8.182 | -5.515 | Relatively Low |
| 871 | 12305198  | Arenobufagin                | -5.736 | -5.514 | Relatively Low |
| 872 | 5316653   | Dichotomitin                | -6.842 | -5.514 | Relatively Low |
| 873 | 641785    | Cardamonin                  | -7.237 | -5.511 | Relatively Low |
| 874 | 11982272  | Silydianin                  | -6.104 | -5.51  | Relatively Low |
| 875 | 7172      | Synephrine                  | -5.664 | -5.507 | Relatively Low |
| 876 | 42609626  | Synephrine<br>hydrochloride | -5.664 | -5.507 | Relatively Low |
| 877 | 442432    | paederoside                 | -6.395 | -5.505 | Relatively Low |
| 878 | 323       | Coumarin                    | -4.967 | -5.505 | Relatively Low |
| 879 | 6755      | Lawsone                     | -6.132 | -5.504 | Relatively Low |
| 880 | 134715187 | Astraganoside               | -5.283 | -5.502 | Relatively Low |
| 881 | 73191     | Nodakenin                   | -6.232 | -5.501 | Relatively Low |
| 882 | 72340     | Tetrahydroalstonine         | -6.038 | -5.5   | Relatively Low |
| 883 | 5489605   | Demethylwedelolactone       | -6.127 | -5.499 | Relatively Low |
| 884 | 91520     | Catalpol                    | -5.378 | -5.495 | Relatively Low |
| 885 | 91895267  | Koumine                     | -4.424 | -5.494 | Relatively Low |
| 886 | 5318650   | Isorhapontigenin            | -6.531 | -5.49  | Relatively Low |
| 887 | 24721282  | Esculentoside A             | -6.545 | -5.484 | Relatively Low |
| 888 | 441145    | Monensin                    | -5.729 | -5.482 | Relatively Low |
| 889 | 5281672   | Myricetin                   | -6.125 | -5.482 | Relatively Low |
| 890 | 5315472   | Bisdemethoxycurcumin        | -6.961 | -5.48  | Relatively Low |
| 891 | 1794427   | Chlorogenic acid            | -5.887 | -5.479 | Relatively Low |
| 892 | 129371873 | Laetanine                   | -6.839 | -5.477 | Relatively Low |
| 893 | 102507168 | Jasminoside B               | -6.346 | -5.474 | Relatively Low |
| 894 | 3469      | Gentisic acid               | -5.779 | -5.474 | Relatively Low |

|     |           |                                                      |        |        |                |
|-----|-----------|------------------------------------------------------|--------|--------|----------------|
| 895 | 3081405   | Phellodendrine                                       | -6.276 | -5.474 | Relatively Low |
| 896 | 59818     | Phellodendrine<br>chloride                           | -5.424 | -5.474 | Relatively Low |
| 897 | 10168     | Rhein                                                | -6.699 | -5.47  | Relatively Low |
| 898 | 7014      | Sparteine                                            | -5.652 | -5.465 | Relatively Low |
| 899 | 85245726  | Ginsenoside Rh8                                      | -6.004 | -5.463 | Relatively Low |
| 900 | 10217     | Dihydroberberine                                     | -4.717 | -5.462 | Relatively Low |
| 901 | 87691     | Loganin                                              | -5.566 | -5.462 | Relatively Low |
| 902 | 72281     | Hesperetin                                           | -7.408 | -5.456 | Relatively Low |
| 903 | 6990      | 2,4-Dihydroxyacetophen<br>one                        | -6.181 | -5.453 | Relatively Low |
| 904 | 95693     | Isoacetovanillone                                    | -5.581 | -5.451 | Relatively Low |
| 905 | 42994     | Lindleyin                                            | -7.502 | -5.448 | Relatively Low |
| 906 | 441742    | Karacolone                                           | -4.87  | -5.447 | Relatively Low |
| 907 | 14699964  | Bernardioside A                                      | -5.272 | -5.445 | Relatively Low |
| 908 | 386331    | 3,5,6,7,3',4'-<br>Hexamethoxyflavone                 | -6.214 | -5.443 | Relatively Low |
| 909 | 162823    | 8-O-Acetyl<br>shanzhiside methyl<br>ester            | -5.203 | -5.442 | Relatively Low |
| 910 | 187808    | Glycitin                                             | -6.325 | -5.441 | Relatively Low |
| 911 | 591524    | 2-hydroxy-6-methoxybe<br>nzoic<br>acid)              | -5.744 | -5.439 | Relatively Low |
| 912 | 102004869 | Ophiogenin 3-O- $\alpha$ -L-<br>rhamnopyranosyl(1→2) | -4.323 | -5.438 | Relatively Low |

|     |          |                                              |        |        |                |
|-----|----------|----------------------------------------------|--------|--------|----------------|
|     |          | [β-D-xylopyranosyl(1→3)]-β-D-glucopyranoside |        |        |                |
| 913 | 5646     | Usnic acid                                   | -7.767 | -5.438 | Relatively Low |
| 914 | 5319741  | Methylophiopogonanone A                      | -6.897 | -5.437 | Relatively Low |
| 915 | 5271805  | Ginkgetin                                    | -7.257 | -5.436 | Relatively Low |
| 916 | 10243535 | 4'-Hydroxy-5,6-dehydrokawain                 | -6.95  | -5.433 | Relatively Low |
| 917 | 5320315  | Oroxylin A                                   | -6.054 | -5.433 | Relatively Low |
| 918 | 10211    | Byakangelicin                                | -6.002 | -5.432 | Relatively Low |
| 919 | 6476139  | 3-O-Caffeoylquinic acid methyl ester         | -6.978 | -5.431 | Relatively Low |
| 920 | 10062187 | Nortanshinone                                | -6.401 | -5.429 | Relatively Low |
| 921 | 10022392 | Angelol B                                    | -5.759 | -5.428 | Relatively Low |
| 922 | 442872   | securinine                                   | -5.414 | -5.428 | Relatively Low |
| 923 | 124072   | Tetrahydrocurcumin                           | -7.415 | -5.426 | Relatively Low |
| 924 | 1183     | Vanillin                                     | -6.005 | -5.426 | Relatively Low |
| 925 | 4978     | Pseudohypericin                              | -7.974 | -5.426 | Relatively Low |
| 926 | 11968396 | Danmelittoside                               | -6.046 | -5.421 | Relatively Low |
| 927 | 11492597 | DihydroDaidzein                              | -7.106 | -5.42  | Relatively Low |
| 928 | 5281565  |                                              | -6.93  | -5.418 | Relatively Low |
| 929 | 69894    | Isoscopletin                                 | -6.444 | -5.418 | Relatively Low |
| 930 | 636822   | Asarone                                      | -5.765 | -5.413 | Relatively Low |

|     |           |                                                     |        |        |                |
|-----|-----------|-----------------------------------------------------|--------|--------|----------------|
| 931 | 11667940  | Neotuberostemonine                                  | -5.09  | -5.413 | Relatively Low |
| 932 | 16401639  | steviolbioside                                      | -5.493 | -5.412 | Relatively Low |
| 933 | 5318998   | Licochalcone A                                      | -7.928 | -5.412 | Relatively Low |
| 934 | 5281811   | Tectorigenin                                        | -6.753 | -5.411 | Relatively Low |
| 935 | 11596309  | Glabrol                                             | -7.556 | -5.409 | Relatively Low |
| 936 | 5490064   | Avicularin                                          | -7.895 | -5.408 | Relatively Low |
| 937 | 26305     | Nodakenitin                                         | -7.507 | -5.407 | Relatively Low |
| 938 | 54706833  | 2-O- $\beta$ -D-Glucopyranosy<br>l-L- ascorbic acid | -5.98  | -5.404 | Relatively Low |
| 939 | 101249251 | sargentol                                           | -6.549 | -5.402 | Relatively Low |
| 940 | 442725    | Aurantio-obtusin $\beta$ -D-<br>glucoside           | -6.466 | -5.402 | Relatively Low |
| 941 | 16094542  | 5,7,4'-Trihydroxy-8-<br>methylflavanone             | -7.944 | -5.399 | Relatively Low |
| 942 | 3082856   | Sesamoside                                          | -5.842 | -5.395 | Relatively Low |
| 943 | 44715524  | Darutoside                                          | -5.254 | -5.394 | Relatively Low |
| 944 | 348130    | Sakuranetin                                         | -7.275 | -5.392 | Relatively Low |
| 945 | 10836072  | Smyrindioloside                                     | -6.716 | -5.39  | Relatively Low |
| 946 | 443354    | Geniposidic acid                                    | -5.164 | -5.389 | Relatively Low |
| 947 | 338       | Salicylic acid                                      | -5.343 | -5.388 | Relatively Low |
| 948 | 320711    | Thalidezine                                         | -4.377 | -5.388 | Relatively Low |
| 949 | 51346120  | Lappaconitine<br>hydrobromide                       | -5.876 | -5.385 | Relatively Low |
| 950 | 23655938  | (2R)-8-Methylsocotrin-4<br>'-ol                     | -7.707 | -5.384 | Relatively Low |
| 951 | 9978650   | 8-Acetylharpagide                                   | -5.346 | -5.383 | Relatively Low |

|     |           |                                |        |        |                |
|-----|-----------|--------------------------------|--------|--------|----------------|
| 952 | 155380    | Obtusin                        | -4.86  | -5.383 | Relatively Low |
|     |           | Paederosidic acid              |        |        |                |
| 953 | 6325269   | methyl ester                   | -6.224 | -5.38  | Relatively Low |
| 954 | 890       | Phytic acid                    | -3.748 | -5.377 | Relatively Low |
| 955 | 5355469   | Flavokawain A                  | -6.402 | -5.377 | Relatively Low |
| 956 | 5471851   | Poricoic acid A                | -5.197 | -5.376 | Relatively Low |
| 957 | 471719    | 7-O-Methylbaicalein            | -6.491 | -5.376 | Relatively Low |
| 958 | 5320203   | 6,7-dihydroxy-4-phenylcoumarin | -5.989 | -5.376 | Relatively Low |
| 959 | 10207     | Aloe emodin                    | -7.157 | -5.373 | Relatively Low |
| 960 | 162868    | Secoxyloganin                  | -5.618 | -5.373 | Relatively Low |
| 961 | 10065830  | Methylphiopogonone A           | -6.916 | -5.373 | Relatively Low |
| 962 | 92043620  | vina-ginsenoside R3            | -5.176 | -5.37  | Relatively Low |
| 963 | 138111462 | Eupalinolide K                 | -6.397 | -5.369 | Relatively Low |
| 964 | 134715164 | Licochalcone E                 | -6.846 | -5.368 | Relatively Low |
| 965 | 60699     | Topotecan Hydrochloride        | -6.684 | -5.367 | Relatively Low |
| 966 | 60700     | Topotecan                      | -6.684 | -5.367 | Relatively Low |
| 967 | 11020893  | Dihydroartemisinic acid        | -4.46  | -5.365 | Relatively Low |
| 968 | 144       | :5-Hydroxy-DL-tryptophan       | -5.528 | -5.364 | Relatively Low |
| 969 | 63123     | Arborin                        | -6.676 | -5.357 | Relatively Low |
| 970 | 14109405  | Ganoderic acid D               | -4.353 | -5.357 | Relatively Low |
| 971 | 137796517 | (9Z,12Z)-N-(3-                 | -6.624 | -5.356 | Relatively Low |

|     |           | Methoxybenzyl)octadec<br>a-9,12-<br>dienamide |        |        |                |
|-----|-----------|-----------------------------------------------|--------|--------|----------------|
| 972 | 442674    | Chebulagic acid                               | -3.971 | -5.356 | Relatively Low |
| 973 | 65090     | Xanthotoxol                                   | -5.816 | -5.355 | Relatively Low |
| 974 | 10992619  | Zeylenol                                      | -6.764 | -5.353 | Relatively Low |
| 975 | 44568160  | Corynoxene                                    | -4.631 | -5.353 | Relatively Low |
| 976 | 12315350  | Deacetylasperulosidic<br>acid                 | -5.696 | -5.352 | Relatively Low |
| 977 | 472335    | Rubitecan                                     | -6.324 | -5.351 | Relatively Low |
| 978 | 5316802   | Kanzonol C                                    | -7.136 | -5.351 | Relatively Low |
| 979 | 78071341  | Deacetyl ganoderic<br>acid F                  | -4.912 | -5.35  | Relatively Low |
| 980 | 135398638 | Hypoxanthine                                  | -5.921 | -5.35  | Relatively Low |
| 981 | 44561398  | Tenacissoside G                               | -6.515 | -5.349 | Relatively Low |
| 982 | 102004640 | N-Methylnuciferine                            | -6.757 | -5.349 | Relatively Low |
| 983 | 44159808  | Garcinone C                                   | -6.296 | -5.346 | Relatively Low |
| 984 | 65305     | Cephalotaxine                                 | -5.387 | -5.346 | Relatively Low |
| 985 | 442106    | Hypaphorine                                   | -5.924 | -5.343 | Relatively Low |
| 986 | 102144112 | Acetylseneciphylline<br>N-oxide               | -4.6   | -5.341 | Relatively Low |
| 987 | 11948668  | Shanzhiside                                   | -6.09  | -5.34  | Relatively Low |
| 988 | 442977    | Imperialine                                   | -5.269 | -5.338 | Relatively Low |
| 989 | 88308     | Dihydromethysticin                            | -6.851 | -5.334 | Relatively Low |
| 990 | 21637711  | Rehmapicroside                                | -5.656 | -5.333 | Relatively Low |
| 991 | 115221    | Ginkgolide A                                  | -4.218 | -5.332 | Relatively Low |

|      |          |                            |        |        |                |
|------|----------|----------------------------|--------|--------|----------------|
| 992  | 114917   | Tanshinone I               | -5.749 | -5.33  | Relatively Low |
| 993  | 5491637  | Iristectorigenin A         | -6.164 | -5.329 | Relatively Low |
| 994  | 73117    | Pinoresinol dimethyl ether | -5.466 | -5.327 | Relatively Low |
| 995  | 442070   | Phorbol                    | -5.365 | -5.327 | Relatively Low |
| 996  | 5280378  | Formononetin               | -6.519 | -5.327 | Relatively Low |
| 997  | 115196   | Brassinolide               | -4.016 | -5.323 | Relatively Low |
| 998  | 5321919  | Thalrugosaminine           | -4.021 | -5.321 | Relatively Low |
| 999  | 5379096  | Jaceosidin                 | -6.85  | -5.319 | Relatively Low |
| 1000 | 3055167  | Byakangelicol              | -6.264 | -5.317 | Relatively Low |
| 1001 | 5281406  | Dephnoretin                | -6.248 | -5.316 | Relatively Low |
| 1002 | 10189    | Eugenin                    | -6.013 | -5.315 | Relatively Low |
| 1003 | 21589010 | (-)-corynoxidine           | -5.443 | -5.314 | Relatively Low |
| 1004 | 5315865  | 3'-O-Acetylhamaudol        | -5.709 | -5.313 | Relatively Low |
| 1005 | 5458190  | Catharanthine              | -5.696 | -5.313 | Relatively Low |
| 1006 | 91895516 | Catharanthine hemitartrate | -5.696 | -5.313 | Relatively Low |
| 1007 | 72343    | Hernandezine               | -4.406 | -5.312 | Relatively Low |
| 1008 | 6303     | Cordycepin                 | -6.687 | -5.31  | Relatively Low |
| 1009 | 14157896 | Loureirin C                | -6.377 | -5.31  | Relatively Low |
| 1010 | 5281607  | Chrysin                    | -7.143 | -5.309 | Relatively Low |
| 1011 | 204810   | Pseudobufarenogin          | -5.796 | -5.307 | Relatively Low |
| 1012 | 5319000  | Licoflavone A              | -6.948 | -5.306 | Relatively Low |
| 1013 | 441960   | Cimifugin                  | -7.009 | -5.304 | Relatively Low |
| 1014 | 24721095 | Gardenoside                | -6.753 | -5.302 | Relatively Low |
| 1015 | 91457    | Beta-Eudesmol              | -6.067 | -5.301 | Relatively Low |



|      |          |                                           |        |        |                |
|------|----------|-------------------------------------------|--------|--------|----------------|
| 1016 | 4788     | Phloretin                                 | -5.865 | -5.301 | Relatively Low |
| 1017 | 3037151  | Hirsuteine                                | -5.654 | -5.3   | Relatively Low |
| 1018 | 72376    | Narciclasine                              | -7.236 | -5.299 | Relatively Low |
| 1019 | 135      | 4-Hydroxybenzoic acid                     | -5.476 | -5.296 | Relatively Low |
| 1020 | 442169   | Arnepavine                                | -5.669 | -5.296 | Relatively Low |
| 1021 | 11869417 | Asarinin                                  | -6.663 | -5.294 | Relatively Low |
| 1022 | 5320755  | Pseudoaspidin                             | -5.596 | -5.292 | Relatively Low |
| 1023 | 65567    | 10-Nitro Camptothecin                     | -6.115 | -5.291 | Relatively Low |
| 1024 | 5316097  | Corylin                                   | -6.704 | -5.285 | Relatively Low |
| 1025 | 5281643  | Hyperoside                                | -8.042 | -5.285 | Relatively Low |
| 1026 | 72310    | Columbamine                               | -5.694 | -5.28  | Relatively Low |
| 1027 | 8357     | 3,4,5-trimethoxybenzoic acid              | -5.591 | -5.276 | Relatively Low |
| 1028 | 441913   | Cimicifugoside                            | -4.051 | -5.276 | Relatively Low |
| 1029 | 190453   | Mulberroside C                            | -6.552 | -5.275 | Relatively Low |
| 1030 | 5742590  | Eleutheroside A                           | -4.571 | -5.274 | Relatively Low |
| 1031 | 3664     | hypocrellin A                             | -5.746 | -5.27  | Relatively Low |
| 1032 | 14031163 | Bayogenin 3-O- $\beta$ -D-glucopyranoside | -5.536 | -5.268 | Relatively Low |
| 1033 | 5319322  | Medicagol                                 | -6.203 | -5.265 | Relatively Low |
| 1034 | 15886258 | 20(S),24(R)-Ocotillol                     | -4.134 | -5.264 | Relatively Low |
| 1035 | 98055304 | Ranaconitine                              | -6.139 | -5.264 | Relatively Low |
| 1036 | 57041970 | Triglochinic acid                         | -4.288 | -5.26  | Relatively Low |
| 1037 | 442249   | Ipecoside                                 | -6.375 | -5.259 | Relatively Low |

|      |           |                                                           |        |        |                |
|------|-----------|-----------------------------------------------------------|--------|--------|----------------|
| 1038 | 45482321  | Episyringaresinol<br>4'-O- $\beta$ -D-<br>glucopyranoside | -7.196 | -5.254 | Relatively Low |
| 1039 | 10659145  | Osthol hydrate                                            | -5.732 | -5.253 | Relatively Low |
| 1040 | 102004875 | Precyasterone                                             | -4.288 | -5.251 | Relatively Low |
| 1041 | 5320351   | Artemitin                                                 | -6.193 | -5.25  | Relatively Low |
| 1042 | 6199      | Psoralen                                                  | -6.034 | -5.248 | Relatively Low |
| 1043 | 10170     | Berbamine                                                 | -5.487 | -5.247 | Relatively Low |
| 1044 | 5318214   | 3'-hydroxygenkwanin                                       | -6.961 | -5.246 | Relatively Low |
| 1045 | 155948    | Atractylenolide III                                       | -5.602 | -5.246 | Relatively Low |
| 1046 | 185617    | Scutellarin                                               | -7.187 | -5.245 | Relatively Low |
| 1047 | 10163     | Lucidin                                                   | -5.69  | -5.245 | Relatively Low |
| 1048 | 46240156  | Norcimifugin                                              | -7.252 | -5.244 | Relatively Low |
| 1049 | 10337211  | Bavachinin                                                | -6.66  | -5.243 | Relatively Low |
| 1050 | 12799036  | Oxyepiberberine                                           | -6.005 | -5.241 | Relatively Low |
| 1051 | 165274    | Aristolochic acid C                                       | -5.803 | -5.239 | Relatively Low |
| 1052 | 118856308 | Cimicidanol-3-O-alpha-<br>L-<br>arabinoside               | -5.819 | -5.238 | Relatively Low |
| 1053 | 592704    | Nudifloric acid                                           | -5.566 | -5.237 | Relatively Low |
| 1054 | 442088    | Evodiamine                                                | -6.5   | -5.231 | Relatively Low |
| 1055 | 56926890  | Taccalonolide AJ                                          | -3.984 | -5.23  | Relatively Low |
| 1056 | 78381113  | Lotusine                                                  | -7.58  | -5.23  | Relatively Low |
| 1057 | 5316525   | 7-Demethylsuberosin                                       | -5.871 | -5.228 | Relatively Low |
| 1058 | 5281653   | Methylswertianin                                          | -5.641 | -5.228 | Relatively Low |
| 1059 | 13844293  | Wulignan A1                                               | -5.822 | -5.228 | Relatively Low |

|      |           |                              |        |        |                |
|------|-----------|------------------------------|--------|--------|----------------|
| 1060 | 11914     | Mandelic acid                | -5.458 | -5.226 | Relatively Low |
| 1061 | 638278    | Isoliquiritigenin            | -8.363 | -5.223 | Relatively Low |
| 1062 | 5281575   | Yangonin                     | -6.012 | -5.219 | Relatively Low |
| 1063 | 60208818  | Mulberroside F               | -7.093 | -5.217 | Relatively Low |
| 1064 | 14528828  | 1,2,3,7-tetramethoxyxanthone | -5.997 | -5.216 | Relatively Low |
| 1065 | 363209    | Demethyleneberberine         | -6.599 | -5.214 | Relatively Low |
| 1066 | 100781    | Tuberostemonine              | -6.313 | -5.213 | Relatively Low |
| 1067 | 75412558  | Salvianolic acid D           | -6.289 | -5.212 | Relatively Low |
| 1068 | 5462442   | Huperzine B                  | -5.793 | -5.212 | Relatively Low |
| 1069 | 3083575   | Obtusifolin                  | -6.395 | -5.21  | Relatively Low |
| 1070 | 5745470   | Icariside I                  | -6.442 | -5.206 | Relatively Low |
| 1071 | 3084335   | magnolioside                 | -6.377 | -5.203 | Relatively Low |
| 1072 | 13936691  | Eurycomanone                 | -5.2   | -5.201 | Relatively Low |
| 1073 | 124928615 | Perisesaccharide C           | -5.304 | -5.201 | Relatively Low |
| 1074 | 14286954  | Pedunculoside                | -4.174 | -5.199 | Relatively Low |
| 1075 | 151108    | L-Quebrachitol               | -7.387 | -5.199 | Relatively Low |
| 1076 | 6325021   | 6-alpha-Hydroxygeniposide    | -6.037 | -5.199 | Relatively Low |
| 1077 | 5281605   | Baicalein                    | -7.228 | -5.199 | Relatively Low |
| 1078 | 102004874 | Ecliptasaponin D             | -4.506 | -5.195 | Relatively Low |
| 1079 | 13343336  | Benzoylhypaconine            | -5.622 | -5.192 | Relatively Low |
| 1080 | 154279    | Alpinetin                    | -8.105 | -5.19  | Relatively Low |
| 1081 | 24360     | Camptothecin                 | -6.731 | -5.189 | Relatively Low |
| 1082 | 5280445   | Luteolin                     | -5.905 | -5.188 | Relatively Low |
| 1083 | 12855920  | Ginsenoside Rh1              | -5.763 | -5.183 | Relatively Low |

|      |          |                                   |        |        |                |
|------|----------|-----------------------------------|--------|--------|----------------|
| 1084 | 5380876  | Senecionine N-Oxide               | -4.732 | -5.182 | Relatively Low |
| 1085 | 638024   | Piperine                          | -6.403 | -5.182 | Relatively Low |
| 1086 | 9851101  | Toosendanin                       | -5.151 | -5.18  | Relatively Low |
| 1087 | 78384572 | Uvarigrin                         | -6.035 | -5.18  | Relatively Low |
| 1088 | 9415     | Monocrotaline                     | -4.661 | -5.179 | Relatively Low |
| 1089 | 14448070 | Atractylenolide II                | -6.208 | -5.177 | Relatively Low |
| 1090 | 5810     | L-Hydroxyproline                  | -5.322 | -5.175 | Relatively Low |
| 1091 | 6169     | Yohimbine<br>Hydrochloride        | -5.503 | -5.175 | Relatively Low |
| 1092 | 165536   | Aristolone                        | -5.012 | -5.174 | Relatively Low |
| 1093 | 69600    | 4-Methoxysalicylaldehyde          | -6.035 | -5.174 | Relatively Low |
| 1094 | 479499   | Beta,beta-Dimethylacrylshikonin   | -7.038 | -5.172 | Relatively Low |
| 1095 | 25087713 | Geoside                           | -6.709 | -5.169 | Relatively Low |
| 1096 | 5321286  | Shikonofuran A                    | -6.567 | -5.169 | Relatively Low |
| 1097 | 124886   | Glutathione                       | -5.418 | -5.169 | Relatively Low |
| 1098 | 68081    | Isoimperatorin                    | -5.908 | -5.168 | Relatively Low |
| 1099 | 427877   | Sarracenin                        | -5.459 | -5.166 | Relatively Low |
| 1100 | 161036   | Sweroside                         | -5.57  | -5.166 | Relatively Low |
| 1101 | 5280536  | 4-Hydroxy-3-methoxycinnamaldehyde | -4.909 | -5.166 | Relatively Low |
| 1102 | 5281671  | Morusin                           | -6.987 | -5.164 | Relatively Low |
| 1103 | 160481   | Isosakuranetin                    | -6.774 | -5.163 | Relatively Low |
| 1104 | 10143    | Isocorydine                       | -6.614 | -5.162 | Relatively Low |

|      |           |                                                      |        |        |                |
|------|-----------|------------------------------------------------------|--------|--------|----------------|
| 1105 | 3083928   | Di-O-methylfraxetin                                  | -5.508 | -5.16  | Relatively Low |
| 1106 | 101600079 | Ganoderenic acid C                                   | -4.723 | -5.16  | Relatively Low |
| 1107 | 68071     | Pinocembrin                                          | -7.991 | -5.157 | Relatively Low |
| 1108 | 72965     | Ailanthone                                           | -5.226 | -5.156 | Relatively Low |
| 1109 | 10237     | Bicuculline                                          | -6.628 | -5.153 | Relatively Low |
| 1110 | 457928    | Bevirimat                                            | -4.44  | -5.152 | Relatively Low |
| 1111 | 5273568   | Fraxin                                               | -7.649 | -5.152 | Relatively Low |
| 1112 | 670971    | N-Methylcytisine                                     | -5.901 | -5.144 | Relatively Low |
| 1113 | 602152    | Isomucronulatol                                      | -6.62  | -5.143 | Relatively Low |
| 1114 | 6450278   | Guggulsterone E&Z                                    | -4.827 | -5.138 | Relatively Low |
| 1115 | 21602024  | Daphylloside                                         | -6.186 | -5.137 | Relatively Low |
| 1116 | 164676    | Tanshinone IIA                                       | -6.602 | -5.134 | Relatively Low |
| 1117 | 71456946  | Songorine                                            | -5.811 | -5.134 | Relatively Low |
| 1118 | 45358012  | Ginkgolide J                                         | -4.776 | -5.133 | Relatively Low |
| 1119 | 15109     | 2,6-Dimethoxybenzoic acid                            | -5.216 | -5.13  | Relatively Low |
| 1120 | 441793    | Eurycomalactone                                      | -5.379 | -5.129 | Relatively Low |
| 1121 | 170569    | Irisfloreantin                                       | -6.597 | -5.126 | Relatively Low |
| 1122 | 10154     | Boldine                                              | -6.265 | -5.126 | Relatively Low |
| 1123 | 2327270   | 1-(3,4-Dimethoxycinnamoyl)pi<br>peridine             | -6.902 | -5.125 | Relatively Low |
| 1124 | 10206     | Cepharanthine                                        | -5.147 | -5.122 | Relatively Low |
| 1125 | 54693473  | 2-O- $\alpha$ -D-Glucopyranosy<br>l-L- ascorbic acid | -4.973 | -5.121 | Relatively Low |
| 1126 | 441831    | Podocdysone B                                        | -6.03  | -5.12  | Relatively Low |

|      |          |                                                    |        |        |                |
|------|----------|----------------------------------------------------|--------|--------|----------------|
| 1127 | 15296614 | PeucedanolPeucedanol                               | -6.279 | -5.12  | Relatively Low |
| 1128 | 5281691  | beta-Rhamnocitrin                                  | -7.325 | -5.12  | Relatively Low |
| 1129 | 198051   | Rhodojaponin II                                    | -4.127 | -5.119 | Relatively Low |
| 1130 | 10604651 | 4-O-beta-Glucoopyranos<br>yl-cis-<br>coumaric acid | -5.325 | -5.118 | Relatively Low |
| 1131 | 3085362  | Gigantol                                           | -6.74  | -5.115 | Relatively Low |
| 1132 | 161218   | Aristolochic acid D                                | -5.803 | -5.114 | Relatively Low |
| 1133 | 73285    | Isoalantolactone                                   | -5.283 | -5.112 | Relatively Low |
| 1134 | 65126    | Carnosic acid                                      | -4.336 | -5.112 | Relatively Low |
| 1135 | 927642   | Cochliophilin A                                    | -6.762 | -5.11  | Relatively Low |
| 1136 | 10429112 | Uncarine C                                         | -6.924 | -5.108 | Relatively Low |
| 1137 | 122667   | 4'-Demethylpodophyllot<br>oxin                     | -5.984 | -5.106 | Relatively Low |
| 1138 | 4114     | Xanthotoxin                                        | -5.812 | -5.104 | Relatively Low |
| 1139 | 23149    | Magnoflorine chloride                              | -6.482 | -5.104 | Relatively Low |
| 1140 | 73337    | Magnoflorine                                       | -6.482 | -5.104 | Relatively Low |
| 1141 | 6451920  | Magnoflorine Iodide                                | -6.482 | -5.104 | Relatively Low |
| 1142 | 14236566 | Bavachin                                           | -8.035 | -5.103 | Relatively Low |
| 1143 | 53266    | Magnocurarine                                      | -6.948 | -5.1   | Relatively Low |
| 1144 | 5281417  | Esculin                                            | -6.324 | -5.1   | Relatively Low |
| 1145 | 311      | Citric acid                                        | -4.029 | -5.097 | Relatively Low |
| 1146 | 8742     | Shikimic acid                                      | -5.875 | -5.096 | Relatively Low |
| 1147 | 10320238 | Bruceine H                                         | -4.904 | -5.095 | Relatively Low |
| 1148 | 6442675  | Echinatin                                          | -6.43  | -5.095 | Relatively Low |
| 1149 | 10742    | Syringic acid                                      | -5.452 | -5.09  | Relatively Low |

|      |          |                                                 |        |        |                |
|------|----------|-------------------------------------------------|--------|--------|----------------|
| 1150 | 5317598  | Alnustone                                       | -6.138 | -5.09  | Relatively Low |
| 1151 | 10478550 | Arnidiol                                        | -3.757 | -5.09  | Relatively Low |
| 1152 | 162878   | Tarasaponin VI                                  | -4.686 | -5.089 | Relatively Low |
| 1153 | 73399    | (+)-Pinoresinol                                 | -5.28  | -5.088 | Relatively Low |
| 1154 | 84800    | Primin                                          | -5.817 | -5.088 | Relatively Low |
| 1155 | 73657193 | Ganoderic Acid G                                | -5.49  | -5.087 | Relatively Low |
| 1156 | 151529   | Schizantherin A                                 | -4.74  | -5.082 | Relatively Low |
| 1157 | 5708351  | 14-Deoxy-11,12-<br>didehydroandrographoli<br>de | -4.541 | -5.082 | Relatively Low |
| 1158 | 71307576 | Talatisamine                                    | -3.89  | -5.081 | Relatively Low |
| 1159 | 188316   | Moslosooflavone                                 | -7.213 | -5.076 | Relatively Low |
| 1160 | 24721165 | Isocolumbin                                     | -5.025 | -5.074 | Relatively Low |
| 1161 | 5070783  | Meranzin hydrate                                | -5.359 | -5.072 | Relatively Low |
| 1162 | 5281623  | Bellidifolin                                    | -6.474 | -5.072 | Relatively Low |
| 1163 | 275182   | Berbamine<br>dihydrochloride                    | -4.716 | -5.071 | Relatively Low |
| 1164 | 21633061 | Deacylmetaplexigenin                            | -6.312 | -5.069 | Relatively Low |
| 1165 | 85364165 | 13-Oxyingenol<br>dodecanoat                     | -4.828 | -5.066 | Relatively Low |
| 1166 | 5281416  | Esculetin                                       | -6.319 | -5.066 | Relatively Low |
| 1167 | 441805   | Rutaevin                                        | -4.046 | -5.064 | Relatively Low |
| 1168 | 160254   | Cryptotanshinone                                | -6.564 | -5.062 | Relatively Low |
| 1169 | 231412   | Fuscaxanthone C                                 | -5.698 | -5.062 | Relatively Low |
| 1170 | 5322079  | Isoanhydroicaritin                              | -6.45  | -5.062 | Relatively Low |
| 1171 | 5468749  | Kaempferol                                      | -6.671 | -5.061 | Relatively Low |

|      |           |                                         |        |        |                |
|------|-----------|-----------------------------------------|--------|--------|----------------|
|      |           | 3,7,4'-trimethyl<br>ether               |        |        |                |
| 1172 | 100341    | Griffonilide                            | -6.196 | -5.06  | Relatively Low |
| 1173 | 5281804   | Prunetin                                | -6.875 | -5.058 | Relatively Low |
| 1174 | 73062     | Kaurenoic acid                          | -5.03  | -5.057 | Relatively Low |
| 1175 | 20054813  | Aconine                                 | -5.284 | -5.056 | Relatively Low |
| 1176 | 969488    | D-Tetrahydropalmatine                   | -6.421 | -5.056 | Relatively Low |
| 1177 | 164660    | Protohypericin                          | -6.261 | -5.054 | Relatively Low |
| 1178 | 164879    | Carabrone                               | -5.964 | -5.052 | Relatively Low |
| 1179 | 5281727   | Pterostilbene                           | -6.498 | -5.049 | Relatively Low |
| 1180 | 5281511   | Xanthatin                               | -5.723 | -5.048 | Relatively Low |
| 1181 | 471722    | 5-Hydroxy-6,7-<br>dimethoxyflavone      | -5.877 | -5.048 | Relatively Low |
| 1182 | 15513544  | De-O-acetylcinobufotali<br>n            | -4.611 | -5.046 | Relatively Low |
| 1183 | 150893    | 3,5,6,7,8,3',4'-<br>Heptamethoxyflavone | -6.091 | -5.045 | Relatively Low |
| 1184 | 131751666 | 8-epidiosbulbin E<br>acetate            | -4.91  | -5.042 | Relatively Low |
| 1185 | 177359    | Interiotherin A                         | -4.502 | -5.042 | Relatively Low |
| 1186 | 440936    | Arbutin                                 | -6.153 | -5.04  | Relatively Low |
| 1187 | 14108469  | Wilforgine                              | -4.642 | -5.039 | Relatively Low |
| 1188 | 122839    | Sennidin A                              | -5.155 | -5.036 | Relatively Low |
| 1189 | 10459879  | Sennidin B                              | -4.297 | -5.036 | Relatively Low |
| 1190 | 5280371   | Bergaptol                               | -5.74  | -5.036 | Relatively Low |
| 1191 | 11877495  | Desacetylcinobufagin                    | -4.51  | -5.032 | Relatively Low |



|      |          |                                                       |        |        |                |
|------|----------|-------------------------------------------------------|--------|--------|----------------|
| 1192 | 5281954  | 7-O-Methylchrysin                                     | -6.713 | -5.032 | Relatively Low |
| 1193 | 44575270 | Andropanoside                                         | -6.486 | -5.031 | Relatively Low |
| 1194 | 22179    | Norboldine                                            | -7.358 | -5.03  | Relatively Low |
| 1195 | 123617   | 9-Methoxycamptothecin                                 | -6.129 | -5.029 | Relatively Low |
| 1196 | 5280906  | Senecionine                                           | -5.418 | -5.028 | Relatively Low |
| 1197 | 5488919  | 3,3'-Di-O-methylelagic acid                           | -5.659 | -5.027 | Relatively Low |
| 1198 | 5481224  | Quercetin<br>3-O-alpha-L-Arabinopyranoside            | -8.44  | -5.026 | Relatively Low |
| 1199 | 89640    | Loganic acid                                          | -5.703 | -5.025 | Relatively Low |
| 1200 | 161271   | Salvigenin                                            | -5.727 | -5.021 | Relatively Low |
| 1201 | 90476678 | Qingyangshengenin                                     | -5.145 | -5.021 | Relatively Low |
| 1202 | 145659   | Sinensetin                                            | -5.786 | -5.02  | Relatively Low |
| 1203 | 115269   | Sophocarpine                                          | -6.283 | -5.02  | Relatively Low |
| 1204 | 5281750  | Seneciphylline                                        | -6.623 | -5.019 | Relatively Low |
| 1205 | 22524560 | Usaramine N-oxide                                     | -5.188 | -5.017 | Relatively Low |
| 1206 | 354159   | 8,9-epoxy-3-isobutyryloxy-10-(2-methylbutanoyl)thymol | -6.099 | -5.016 | Relatively Low |
| 1207 | 637858   | PIPERLONGUMINE                                        | -5.505 | -5.016 | Relatively Low |
| 1208 | 5315263  | Casticin                                              | -6.542 | -5.014 | Relatively Low |
| 1209 | 5274585  | Quercetin 3-O-beta-D-glucuronide                      | -6.44  | -5.012 | Relatively Low |
| 1210 | 5280443  | Apigenin                                              | -8.43  | -5.011 | Relatively Low |

|      |          |                                     |        |        |                |
|------|----------|-------------------------------------|--------|--------|----------------|
| 1211 | 5321961  | Toddalolactone                      | -5.875 | -5.01  | Relatively Low |
| 1212 | 5464381  | Velutin                             | -7.057 | -5.007 | Relatively Low |
| 1213 | 7092     | 6-Methylcoumarin                    | -5.469 | -5.007 | Relatively Low |
| 1214 | 75412555 | Ginsenoside Rk3                     | -4.732 | -5.005 | Relatively Low |
| 1215 | 11092    | Paeonol                             | -5.698 | -5.004 | Relatively Low |
| 1216 | 3564     | Harmaline                           | -5.881 | -4.995 | Relatively Low |
| 1217 | 6440397  | Caftaric acid                       | -4.885 | -4.993 | Relatively Low |
|      |          | Oroxylin A                          |        |        |                |
| 1218 | 21721956 | 7-O-beta-D-glucuronide methyl ester | -6.352 | -4.993 | Relatively Low |
| 1219 | 4101463  | Pinostrobin                         | -6.824 | -4.989 | Relatively Low |
| 1220 | 10903113 | Salvianolic acid F                  | -6.321 | -4.987 | Relatively Low |
| 1221 | 5281662  | Swertianolin                        | -6.841 | -4.986 | Relatively Low |
| 1222 | 5281703  | Wogonin                             | -7.216 | -4.985 | Relatively Low |
| 1223 | 14240934 | Hupehenine                          | -4.839 | -4.984 | Relatively Low |
| 1224 | 6683     | Purpurin                            | -6.448 | -4.983 | Relatively Low |
| 1225 | 370      | Gallic acid                         | -5.615 | -4.982 | Relatively Low |
| 1226 | 13936703 | 13-alpha-(21)-Epoxyeurycomanone     | -4.932 | -4.981 | Relatively Low |
| 1227 | 13873655 | 3-Isomangostin                      | -4.852 | -4.979 | Relatively Low |
| 1228 | 72724    | Helenine                            | -5.447 | -4.978 | Relatively Low |
| 1229 | 6651     | 4-p-Menthan-1,8-diol                | -5.132 | -4.975 | Relatively Low |
| 1230 | 5280569  | Daphnetin                           | -5.313 | -4.975 | Relatively Low |
| 1231 | 9838995  | Brevifolincarboxylic acid           | -6.409 | -4.975 | Relatively Low |

|      |           |                                 |        |        |                |
|------|-----------|---------------------------------|--------|--------|----------------|
| 1232 | 189695    | 3-Furfuryl 2-pyrrolicarboxylate | -6.579 | -4.973 | Relatively Low |
| 1233 | 21151017  | Rhodojaponin III                | -5.238 | -4.971 | Relatively Low |
| 1234 | 139291217 | Mogroside I A1                  | -6.581 | -4.967 | Relatively Low |
| 1235 | 442523    | Dendrobine                      | -4.977 | -4.964 | Relatively Low |
| 1236 | 5281633   | Gartanin                        | -6.438 | -4.957 | Relatively Low |
| 1237 | 6602508   | Stigmasterol glucoside          | -4.642 | -4.951 | Relatively Low |
| 1238 | 735755    | 3,4,5-Trimethoxycinnamic acid   | -5.373 | -4.95  | Relatively Low |
| 1239 | 21592249  | Paederosidic acid               | -5.191 | -4.949 | Relatively Low |
| 1240 | 5281437   | Costunolide                     | -5.254 | -4.948 | Relatively Low |
| 1241 | 72948694  | Caudatin                        | -5.967 | -4.948 | Relatively Low |
| 1242 | 222528    | Deoxycholic acid                | -5.355 | -4.948 | Relatively Low |
| 1243 | 854026    | Huperzine A                     | -5.539 | -4.948 | Relatively Low |
| 1244 | 453213    | Perakine                        | -4.96  | -4.948 | Relatively Low |
| 1245 | 497204    | Lindenenol acetate              | -5.271 | -4.943 | Relatively Low |
| 1246 | 5317750   | Glycitein                       | -6.467 | -4.943 | Relatively Low |
| 1247 | 24836956  | Neocurdione                     | -4.762 | -4.942 | Relatively Low |
| 1248 | 169234    | Magnolol                        | -5.634 | -4.941 | Relatively Low |
| 1249 | 11827970  | Polyphyllin A                   | -4.876 | -4.94  | Relatively Low |
| 1250 | 5321018   | Atractylenolide I               | -6.218 | -4.939 | Relatively Low |
| 1251 | 14655552  | Oroxyloside                     | -6.076 | -4.939 | Relatively Low |
| 1252 | 1550607   | Auraptene                       | -5.803 | -4.937 | Relatively Low |
| 1253 | 9851693   | ISOFEBRIFUGINE (B604866K055)    | -7.326 | -4.937 | Relatively Low |
| 1254 | 68085     | Dictamnine                      | -5.265 | -4.936 | Relatively Low |

|      |           |                                     |        |        |                |
|------|-----------|-------------------------------------|--------|--------|----------------|
| 1255 | 5281813   | Wedelolactone                       | -5.966 | -4.935 | Relatively Low |
| 1256 | 84298     | Asperuloside                        | -6.155 | -4.934 | Relatively Low |
| 1257 | 440229    | Tetrahydrocolumbamine               | -5.845 | -4.932 | Relatively Low |
| 1258 | 119041    | Obacunone                           | -3.283 | -4.93  | Relatively Low |
| 1259 | 2950      | 1,8-Dihydroxyanthraqui<br>none      | -6.599 | -4.929 | Relatively Low |
| 1260 | 168115    | 10-Gingerol                         | -6.308 | -4.928 | Relatively Low |
| 1261 | 10038868  | 3'-Hydroxypterostilbene             | -5.945 | -4.926 | Relatively Low |
| 1262 | 10220256  | Dihydrokawain                       | -6.413 | -4.923 | Relatively Low |
| 1263 | 60961     | Adenosine                           | -6.693 | -4.92  | Relatively Low |
| 1264 | 72703     | Berberrubine                        | -5.764 | -4.92  | Relatively Low |
| 1265 | 12313579  | N-nornuciferine                     | -5.776 | -4.919 | Relatively Low |
| 1266 | 72435     | Picropodophyllotoxin                | -6.655 | -4.918 | Relatively Low |
| 1267 | 65373     | Secoisolariciresinol                | -6.14  | -4.918 | Relatively Low |
| 1268 | 101671037 | Mesaconine                          | -5.143 | -4.918 | Relatively Low |
| 1269 | 6440408   | Kuwanon E                           | -6.038 | -4.915 | Relatively Low |
| 1270 | 11664505  | Isorhamnetin 3-O-<br>neohesperoside | -6.719 | -4.914 | Relatively Low |
| 1271 | 442279    | Micheliolide                        | -6.114 | -4.912 | Relatively Low |
| 1272 | 31244     | p-Anisaldehyde                      | -5.257 | -4.911 | Relatively Low |
| 1273 | 137706510 | Eupalinolide A                      | -6.772 | -4.909 | Relatively Low |
| 1274 | 9910474   | Neoruscogenin                       | -6.455 | -4.907 | Relatively Low |
| 1275 | 441887    | Gitogenin                           | -5.578 | -4.905 | Relatively Low |
| 1276 | 14525327  | Mogrol                              | -4.981 | -4.905 | Relatively Low |
| 1277 | 57396771  | Ganoderic Acid C2                   | -4.274 | -4.905 | Relatively Low |
| 1278 | 10358150  | Eriosematin                         | -6.306 | -4.904 | Relatively Low |

|      |           |                                                       |        |        |                |
|------|-----------|-------------------------------------------------------|--------|--------|----------------|
| 1279 | 5320438   | Pectolarigenin                                        | -6.18  | -4.904 | Relatively Low |
| 1280 | 71308174  | Chebulic acid                                         | -4.479 | -4.904 | Relatively Low |
| 1281 | 160876    | Epiberberine                                          | -5.762 | -4.903 | Relatively Low |
| 1282 | 71306915  | Astragaloside II                                      | -5.88  | -4.903 | Relatively Low |
| 1283 | 11556558  | 3,29-O-Dibenzoylmultiflor-8-en-3-alpha,7beta,29-triol | -3.797 | -4.903 | Relatively Low |
| 1284 | 5280442   | Acacetin                                              | -6.58  | -4.901 | Relatively Low |
| 1285 | 11316212  | Cowaxanthone B                                        | -6.101 | -4.9   | Relatively Low |
| 1286 | 101679160 | Methylnissolin-3-O-glucoside                          | -5.668 | -4.898 | Relatively Low |
| 1287 | 5281628   | Hispidulin                                            | -6.106 | -4.896 | Relatively Low |
| 1288 | 197810    | Chelidonine                                           | -5.286 | -4.894 | Relatively Low |
| 1289 | 107848    | Geniposide                                            | -5.894 | -4.891 | Relatively Low |
| 1290 | 189670    | Loureirin B                                           | -6.941 | -4.891 | Relatively Low |
| 1291 | 442435    | Swertiamarin                                          | -6.201 | -4.888 | Relatively Low |
| 1292 | 5321010   | Oridonin                                              | -5.5   | -4.888 | Relatively Low |
| 1293 | 3220      | Emodin                                                | -7.035 | -4.888 | Relatively Low |
| 1294 | 161294    | Peimisine                                             | -4.36  | -4.884 | Relatively Low |
| 1295 | 442042    | Ingenol                                               | -5.369 | -4.883 | Relatively Low |
| 1296 | 3806      | Juglone                                               | -6.09  | -4.883 | Relatively Low |
| 1297 | 101300    | D-Dicentrine                                          | -6.708 | -4.883 | Relatively Low |
| 1298 | 14016780  | Luteolin 7-sulfate                                    | -5.461 | -4.881 | Relatively Low |
| 1299 | 97283     | 10-Methoxycamptothecin                                | -6.161 | -4.88  | Relatively Low |
| 1300 | 120682    | Bullatine B                                           | -5.953 | -4.88  | Relatively Low |

|      |           |                                                                                                            |        |        |                |
|------|-----------|------------------------------------------------------------------------------------------------------------|--------|--------|----------------|
| 1301 | 96539     | Gardenin B                                                                                                 | -6.001 | -4.875 | Relatively Low |
| 1302 | 11815492  | Ginsenoside Ro                                                                                             | -4.219 | -4.873 | Relatively Low |
| 1303 | 632135    | Isosinensetin                                                                                              | -6.259 | -4.872 | Relatively Low |
| 1304 | 5284649   | Demethyltexasin                                                                                            | -7.369 | -4.872 | Relatively Low |
| 1305 | 5909      | Pilocarpine<br>Hydrochloride                                                                               | -5.871 | -4.872 | Relatively Low |
| 1306 | 10031398  | Pseudolaric acid<br>B-O-beta-D-<br>glucopyranoside                                                         | -6.849 | -4.871 | Relatively Low |
| 1307 | 5321765   | O-Methylbroussonchalcone B, 4'                                                                             | -6.878 | -4.867 | Relatively Low |
| 1308 | 5281946   | Galangin 3-methyl<br>ether                                                                                 | -6.957 | -4.865 | Relatively Low |
| 1309 | 5944      | Cantharidin                                                                                                | -5.806 | -4.864 | Relatively Low |
| 1310 | 5355836   | 7,8-Dihydroxy-4-<br>methylcoumarin                                                                         | -5.757 | -4.863 | Relatively Low |
| 1311 | 101746    | Sesamolin                                                                                                  | -6.085 | -4.861 | Relatively Low |
| 1312 | 24721502  | Ginkgolide C                                                                                               | -5.528 | -4.861 | Relatively Low |
| 1313 | 102258917 | Tenacigenin B, 3-O-β-<br>Allopyranosyl-(1→4)-β-<br>oleandropyranosyl-11-O-<br>-<br>isobutyryl-12-O-acetyl- | -6.121 | -4.86  | Relatively Low |
| 1314 | 14036813  | Alisol C Monoacetate                                                                                       | -4.304 | -4.86  | Relatively Low |
| 1315 | 14077830  | 3-Hydroxy-9,10-<br>Dimethoxypterocarpan                                                                    | -5.516 | -4.86  | Relatively Low |

|      |          |                                                                      |        |        |                |
|------|----------|----------------------------------------------------------------------|--------|--------|----------------|
| 1316 | 15227299 | Stachysterone D                                                      | -6.989 | -4.859 | Relatively Low |
| 1317 | 71307553 | 8-Deacetyl<br>yunaconitine                                           | -5.277 | -4.859 | Relatively Low |
| 1318 | 6989     | Thymol                                                               | -5.942 | -4.856 | Relatively Low |
| 1319 | 3663     | Hypericin                                                            | -8.021 | -4.854 | Relatively Low |
| 1320 | 441737   | Hypaconitine                                                         | -4.251 | -4.853 | Relatively Low |
| 1321 | 173273   | Triptophenolide                                                      | -6.151 | -4.852 | Relatively Low |
| 1322 | 5317519  | Ganolactone B                                                        | -3.771 | -4.852 | Relatively Low |
| 1323 | 24721310 | Bulleyaconitine A                                                    | -6.221 | -4.852 | Relatively Low |
| 1324 | 497203   | Lindenenol                                                           | -6.332 | -4.851 | Relatively Low |
| 1325 | 124052   | Glabridin                                                            | -6.603 | -4.848 | Relatively Low |
| 1326 | 65243    | Ginkgolide B                                                         | -5.206 | -4.847 | Relatively Low |
| 1327 | 5317652  | Glabrone                                                             | -6.522 | -4.845 | Relatively Low |
| 1328 | 10639    | Physcion                                                             | -6.969 | -4.84  | Relatively Low |
| 1329 | 285033   | Homoharringtonine                                                    | -4.801 | -4.835 | Relatively Low |
| 1330 | 25252741 | 2'-O-methyl-Kurarinone                                               | -6.752 | -4.834 | Relatively Low |
| 1331 | 159999   | Crebanine                                                            | -5.984 | -4.831 | Relatively Low |
| 1332 | 73353637 | N-(3-Methoxybenzyl)(9Z,12Z,<br>,15Z)-<br>octadeca-9,12,15-trienamide | -5.336 | -4.829 | Relatively Low |
| 1333 | 21589011 | (-)-epicorynoxidine                                                  | -5.089 | -4.827 | Relatively Low |
| 1334 | 6474309  | 4,5-Dicaffeoylquinic<br>acid                                         | -7.304 | -4.826 | Relatively Low |
| 1335 | 736186   | Isoferulic Acid                                                      | -4.909 | -4.826 | Relatively Low |

|      |           |                                                                              |        |        |                |
|------|-----------|------------------------------------------------------------------------------|--------|--------|----------------|
| 1336 | 2355      | Bergapten                                                                    | -6.214 | -4.825 | Relatively Low |
| 1337 | 234823    | Eudesmin                                                                     | -5.101 | -4.825 | Relatively Low |
| 1338 | 10032468  | Actein                                                                       | -3.521 | -4.824 | Relatively Low |
| 1339 | 6441391   | Curdione                                                                     | -4.537 | -4.82  | Relatively Low |
| 1340 | 92044469  | Ingenol-5,20-acetonide                                                       | -5.815 | -4.82  | Relatively Low |
| 1341 | 124069    | Dihydrosanguinarine                                                          | -5.275 | -4.818 | Relatively Low |
| 1342 | 10235     | Cytisine                                                                     | -6.906 | -4.816 | Relatively Low |
|      |           | Tanshinone IIA                                                               |        |        |                |
| 1343 | 23669322  | sodium sulfonate                                                             | -4.523 | -4.814 | Relatively Low |
| 1344 | 9890994   | Saikogenin D                                                                 | -5.758 | -4.814 | Relatively Low |
| 1345 | 5495925   | Beta-mangostin                                                               | -5.386 | -4.813 | Relatively Low |
| 1346 | 10988340  | Alismoxide                                                                   | -6.113 | -4.809 | Relatively Low |
| 1347 | 9885603   | Uncarine E                                                                   | -4.011 | -4.809 | Relatively Low |
| 1348 | 441747    | Mesaconitine                                                                 | -4.493 | -4.808 | Relatively Low |
| 1349 | 10051937  | Gymnemagenin                                                                 | -4.451 | -4.807 | Relatively Low |
| 1350 | 102410351 | Lucidenic acid B                                                             | -3.549 | -4.807 | Relatively Low |
| 1351 | 11061578  | Prosapogenin A                                                               | -6.923 | -4.805 | Relatively Low |
| 1352 | 1268142   | Nootkatone                                                                   | -5.725 | -4.802 | Relatively Low |
| 1353 | 6917974   | Bufogenin                                                                    | -4.411 | -4.8   | Relatively Low |
| 1354 | 471003    | Ganoderic Acid B                                                             | -4.664 | -4.8   | Relatively Low |
|      |           | 3-Oxo-21 $\alpha$ -methoxy-24,25,26,27-tetranortirucall-7-ene-23(21)-lactone |        |        |                |
| 1355 | 102263760 |                                                                              | -5.085 | -4.798 | Relatively Low |
| 1356 | 8955      | Pregnenolone                                                                 | -6.844 | -4.798 | Relatively Low |



|      |           |                       |        |        |                |
|------|-----------|-----------------------|--------|--------|----------------|
| 1357 | 5281617   | Genkwanin             | -6.3   | -4.797 | Relatively Low |
| 1358 | 6223      | Gliotoxin             | -5.934 | -4.792 | Relatively Low |
| 1359 | 5574924   | Arglabin              | -5.115 | -4.791 | Relatively Low |
| 1360 | 20056103  | Lucidenic acid C      | -3.382 | -4.79  | Relatively Low |
| 1361 | 10475115  | Corynoxine            | -4.935 | -4.787 | Relatively Low |
| 1362 | 157539    | Crassicauline A       | -4.07  | -4.787 | Relatively Low |
| 1363 | 434211    | Oleaside A            | -4.23  | -4.786 | Relatively Low |
| 1364 | 5281304   | Bruceantin            | -4.472 | -4.786 | Relatively Low |
| 1365 | 358901    | Phyllanthin           | -5.813 | -4.786 | Relatively Low |
| 1366 | 10547386  | Palmatrubine          | -6.447 | -4.783 | Relatively Low |
| 1367 | 73078     | Tetrandrine           | -4.317 | -4.783 | Relatively Low |
| 1368 | 12302076  | Brevilin A            | -5.046 | -4.782 | Relatively Low |
| 1369 | 102004721 | 25-methoxyalisol A    | -3.179 | -4.78  | Relatively Low |
| 1370 | 177014    | Corynoline            | -5.404 | -4.779 | Relatively Low |
| 1371 | 358832    | 5-O-Demethylnobiletin | -7.047 | -4.777 | Relatively Low |
| 1372 | 5281279   | Lappaconitine         | -5.787 | -4.777 | Relatively Low |
| 1373 | 441740    | Indaconitine          | -4.563 | -4.776 | Relatively Low |
| 1374 | 101595    | Vomicine              | -5.442 | -4.775 | Relatively Low |
| 1375 | 23711819  | Sodium Danshensu      | -4.837 | -4.771 | Relatively Low |
| 1376 | 91466     | Matrine               | -5.632 | -4.77  | Relatively Low |
| 1377 | 73481     | Fangchinoline         | -4.572 | -4.77  | Relatively Low |
| 1378 | 44563121  | Kushenol A            | -8.405 | -4.768 | Relatively Low |
| 1379 | 10926754  | Fargesin              | -6.077 | -4.767 | Relatively Low |
| 1380 | 9975641   | Przewalskinic acid A  | -4.827 | -4.766 | Relatively Low |
| 1381 | 5281626   |                       | -6.09  | -4.766 | Relatively Low |
| 1382 | 5281855   | Ellagic Acid          | -5.985 | -4.764 | Relatively Low |

|      |          |                               |        |        |                |
|------|----------|-------------------------------|--------|--------|----------------|
| 1383 | 260535   | Vindoline                     | -4.955 | -4.761 | Relatively Low |
| 1384 | 72344    | Nobiletin                     | -5.902 | -4.76  | Relatively Low |
| 1385 | 441893   | Ruscogenin                    | -6.015 | -4.759 | Relatively Low |
| 1386 | 439503   | Salicin                       | -6.654 | -4.759 | Relatively Low |
| 1387 | 14109375 | Lucidenic acid A              | -4.107 | -4.755 | Relatively Low |
| 1388 | 10364    | Carvacrol                     | -5.695 | -4.752 | Relatively Low |
| 1389 | 88708    | Gentiopicrin                  | -6.772 | -4.749 | Relatively Low |
| 1390 | 443026   | Veraguensin                   | -6.7   | -4.749 | Relatively Low |
| 1391 | 11521428 | Senkyunolide I                | -5.866 | -4.747 | Relatively Low |
| 1392 | 77547517 | N-Benzylinolenamide           | -5.726 | -4.744 | Relatively Low |
| 1393 | 479500   | Isobutylshikonin              | -6.604 | -4.742 | Relatively Low |
| 1394 | 20055073 | Worenine                      | -6.25  | -4.741 | Relatively Low |
| 1395 | 7456     | Methyl<br>4-hydroxybenzoate   | -5.062 | -4.739 | Relatively Low |
| 1396 | 72323    | Jatrorrhizine                 | -5.739 | -4.738 | Relatively Low |
| 1397 | 371256   | Jatrorrhizine chloride        | -5.739 | -4.738 | Relatively Low |
| 1398 | 245005   | Aconitine                     | -4.866 | -4.737 | Relatively Low |
| 1399 | 3047739  | Fraxinol                      | -5.574 | -4.736 | Relatively Low |
| 1400 | 134606   | Trigonelline<br>Hydrochloride | -5.403 | -4.733 | Relatively Low |
| 1401 | 75412551 | 20(R)-Ginsenoside<br>Rg2      | -6.209 | -4.733 | Relatively Low |
| 1402 | 12305974 | Periplocymarin                | -4.747 | -4.731 | Relatively Low |
| 1403 | 54580250 | Morellic acid                 | -4.704 | -4.731 | Relatively Low |
| 1404 | 107985   | Triptolide                    | -5.114 | -4.73  | Relatively Low |
| 1405 | 5283820  | Hyodeoxycholic acid           | -4.138 | -4.729 | Relatively Low |

|      |          |                             |        |        |                |
|------|----------|-----------------------------|--------|--------|----------------|
| 1406 | 6443046  | Geissoschizine methyl ether | -4.89  | -4.724 | Relatively Low |
| 1407 | 441826   | Ajugasterone C              | -5.666 | -4.722 | Relatively Low |
| 1408 | 16220013 | Tomatidine HCl              | -5.491 | -4.717 | Relatively Low |
| 1409 | 185605   | (+)-Corypalmine             | -5.643 | -4.717 | Relatively Low |
| 1410 | 6442374  | Furanodienon                | -4.845 | -4.715 | Relatively Low |
| 1411 | 5321317  | Tetrahydroepiberberine      | -6.73  | -4.71  | Relatively Low |
| 1412 | 5321251  | Senkyunolide H              | -6.927 | -4.71  | Relatively Low |
| 1413 | 38347607 | Praeruptorin A              | -4.86  | -4.709 | Relatively Low |
| 1414 | 334704   | Marmesin                    | -7.335 | -4.708 | Relatively Low |
| 1415 | 10974362 | 27-Deoxyactein              | -4.666 | -4.704 | Relatively Low |
| 1416 | 5281783  | Ethyl 4-methoxycinnamate    | -5.16  | -4.703 | Relatively Low |
| 1417 | 637110   | O-Methylaloeresin A, 7-     | -7.753 | -4.7   | Relatively Low |
| 1418 | 259846   | Lupeol                      | -3.655 | -4.699 | Relatively Low |
| 1419 | 4871     | Pomiferin                   | -6.058 | -4.699 | Relatively Low |
| 1420 | 160006   | Bruceine A                  | -4.332 | -4.699 | Relatively Low |
| 1421 | 11290503 | 20-deoxyingenol             | -5.655 | -4.695 | Relatively Low |
| 1422 | 689043   | Caffeic acid                | -4.481 | -4.695 | Relatively Low |
| 1423 | 3884     | Lapachol                    | -6.586 | -4.695 | Relatively Low |
| 1424 | 1254     | Menthol                     | -5.244 | -4.692 | Relatively Low |
| 1425 | 442009   | Carnosol                    | -6.196 | -4.688 | Relatively Low |
| 1426 | 73174    | Dehydrocostus Lactone       | -5.579 | -4.688 | Relatively Low |
| 1427 | 71448947 | Dahurinol                   | -4.907 | -4.683 | Relatively Low |
| 1428 | 10574    | Periplogenin                | -5.1   | -4.682 | Relatively Low |

|      |           |                              |        |        |                |
|------|-----------|------------------------------|--------|--------|----------------|
| 1429 | 5317808   | Gomisin O                    | -6.673 | -4.68  | Relatively Low |
| 1430 | 1174      | Uracil                       | -6.411 | -4.677 | Relatively Low |
| 1431 | 20525     | Asarylaldehyde               | -5.706 | -4.676 | Relatively Low |
| 1432 | 14078177  | Schisandrone                 | -6.076 | -4.673 | Relatively Low |
| 1433 | 5359389   | Harmine hydrochloride        | -5.651 | -4.673 | Relatively Low |
| 1434 | 21592283  | Lucidenic acid LM1           | -4.204 | -4.672 | Relatively Low |
| 1435 | 74787691  | Dracorhodin perchlorate      | -7.648 | -4.668 | Relatively Low |
| 1436 | 159278    | Salidroside                  | -6.819 | -4.666 | Relatively Low |
| 1437 | 68827     | Artemisinin                  | -5.261 | -4.665 | Relatively Low |
| 1438 | 135394272 | 6-Methoxydihydrosanguinarine | -5.798 | -4.664 | Relatively Low |
| 1439 | 5154      | Sanguinarine                 | -5.859 | -4.664 | Relatively Low |
| 1440 | 68635     | Sanguinarium chloride        | -5.859 | -4.664 | Relatively Low |
| 1441 | 442985    | Solasodine                   | -5.97  | -4.664 | Relatively Low |
| 1442 | 5281781   | Irisolidone                  | -5.75  | -4.664 | Relatively Low |
| 1443 | 194000    | Agrimol B                    | -6.882 | -4.663 | Relatively Low |
| 1444 | 7067324   | Andropanolide                | -4.925 | -4.661 | Relatively Low |
| 1445 | 10208     | Chrysophanol                 | -6.945 | -4.661 | Relatively Low |
| 1446 | 1738      | Homovanillic acid            | -5.379 | -4.66  | Relatively Low |
| 1447 | 1110      | Succinic acid                | -3.869 | -4.66  | Relatively Low |
| 1448 | 5316848   | Angelicide                   | -5.611 | -4.659 | Relatively Low |
| 1449 | 92043552  | Dehydrocorydaline            | -5.975 | -4.659 | Relatively Low |
| 1450 | 638234    | Thermopsine                  | -5.792 | -4.658 | Relatively Low |
| 1451 | 259803    | Gamabufotalin                | -5.894 | -4.657 | Relatively Low |
| 1452 | 21122581  | Rosamultin                   | -5.813 | -4.657 | Relatively Low |
| 1453 | 3037048   | Isorhynchophylline           | -5.056 | -4.655 | Relatively Low |

|      |          |                                |        |        |                |
|------|----------|--------------------------------|--------|--------|----------------|
| 1454 | 6770     | Tetrahydrocoptisine            | -6.993 | -4.655 | Relatively Low |
| 1455 | 124062   | Rubiadin                       | -5.703 | -4.654 | Relatively Low |
| 1456 | 8768     | Protocatechualdehyde           | -5.931 | -4.653 | Relatively Low |
| 1457 | 68486    | Suberosin                      | -5.364 | -4.65  | Relatively Low |
| 1458 | 929262   | Sclareolide                    | -4.965 | -4.646 | Relatively Low |
| 1459 | 78385214 | Liquidambaric lactone          | -3.939 | -4.646 | Relatively Low |
| 1460 | 10177    | Indirubin                      | -5.728 | -4.646 | Relatively Low |
| 1461 | 64685    | 2-Borneol                      | -5.926 | -4.644 | Relatively Low |
| 1462 | 6552009  | (+)-Borneol                    | -5.238 | -4.641 | Relatively Low |
| 1463 | 259776   | Cinobufotalin                  | -4.514 | -4.641 | Relatively Low |
| 1464 | 442424   | Genipin                        | -5.736 | -4.639 | Relatively Low |
| 1465 | 89406    | Dihydroisotanshinone<br>I      | -7.056 | -4.639 | Relatively Low |
| 1466 | 31211    | Zingerone                      | -5.386 | -4.638 | Relatively Low |
| 1467 | 182199   | Arnicolide D                   | -5.059 | -4.636 | Relatively Low |
| 1468 | 71765531 | N-(3-Methoxybenzyl)palmitamide | -5.572 | -4.635 | Relatively Low |
| 1469 | 13322806 | Hydroxylogispinogenin,<br>23-  | -5.026 | -4.635 | Relatively Low |
| 1470 | 75130910 | Gomisin D                      | -3.112 | -4.634 | Relatively Low |
| 1471 | 9852086  | Ginsenoside CK                 | -6.152 | -4.634 | Relatively Low |
| 1472 | 441975   | Tetrahydroalstonine            | -4.703 | -4.634 | Relatively Low |
| 1473 | 27924    | Phorbol-12-Myristate-13-       | -5.245 | -4.633 | Relatively Low |
| 1474 | 5281600  | Amentoflavone                  | -7.081 | -4.632 | Relatively Low |

|      |           |                                   |        |        |                |
|------|-----------|-----------------------------------|--------|--------|----------------|
| 1475 | 13945489  | Kamebakaurine                     | -4.421 | -4.631 | Relatively Low |
| 1476 | 23669636  | Sodium Ferulate                   | -4.455 | -4.63  | Relatively Low |
| 1477 | 3000518   | Dihydroartemisinin                | -6.673 | -4.629 | Relatively Low |
| 1478 | 5317238   | Ethyl caffeate                    | -5.966 | -4.626 | Relatively Low |
| 1479 | 134715246 | Arenobufagin<br>3-hemisuberate    | -4.5   | -4.622 | Relatively Low |
| 1480 | 136419    | 7,4'-Di-O-methylaidzei<br>n       | -6.42  | -4.621 | Relatively Low |
| 1481 | 115250    | Taraxasterol                      | -3.792 | -4.616 | Relatively Low |
| 1482 | 97226     | 10-Hydroxycamptotheci<br>n        | -7.671 | -4.616 | Relatively Low |
| 1483 | 1549095   | Coniferyl alcohol                 | -5.822 | -4.613 | Relatively Low |
| 1484 | 10856530  | lepomerine                        | -6.222 | -4.612 | Relatively Low |
| 1485 | 90474153  | Handelin                          | -3.834 | -4.611 | Relatively Low |
| 1486 | 3000322   | Hyoscine                          | -5.374 | -4.611 | Relatively Low |
| 1487 | 6603108   | Scopolamine<br>hydrobromide       | -6.573 | -4.611 | Relatively Low |
| 1488 | 134715183 | Epimagnolin B                     | -5.878 | -4.608 | Relatively Low |
| 1489 | 441828    | 25R-Inokosterone                  | -6.095 | -4.606 | Relatively Low |
| 1490 | 101616676 | 28-demethyl<br>- $\beta$ -amyrone | -3.537 | -4.606 | Relatively Low |
| 1491 | 3037448   | Isocorynoxine                     | -4.876 | -4.606 | Relatively Low |
| 1492 | 5316262   | Isoolivil                         | -5.615 | -4.605 | Relatively Low |
| 1493 | 9859136   | Eleutheroside C                   | -4.656 | -4.603 | Relatively Low |
| 1494 | 3515      | Guaiazulene                       | -6.534 | -4.603 | Relatively Low |
| 1495 | 5317564   | 8-Geranopsoralen                  | -6.278 | -4.601 | Relatively Low |

|      |          |                               |        |        |                |
|------|----------|-------------------------------|--------|--------|----------------|
| 1496 | 10205    | plumbapin                     | -5.957 | -4.6   | Relatively Low |
| 1497 | 11953931 | Voacamine                     | -4.896 | -4.598 | Relatively Low |
| 1498 | 99615    | Betulinaldehyde               | -3.726 | -4.595 | Relatively Low |
| 1499 | 5281756  | Usaramine                     | -5.064 | -4.592 | Relatively Low |
| 1500 | 10569    | Abietic acid                  | -4.354 | -4.587 | Relatively Low |
| 1501 | 11541511 | Oleandrin                     | -4.471 | -4.586 | Relatively Low |
| 1502 | 8369     | Maltol                        | -5.317 | -4.586 | Relatively Low |
| 1503 | 61361    | Butylphthalide                | -5.872 | -4.585 | Relatively Low |
| 1504 | 91915    | Sclareol glycol               | -5.238 | -4.583 | Relatively Low |
| 1505 | 439877   | N-Caffeoylputrescine,<br>(E)- | -5.459 | -4.583 | Relatively Low |
| 1506 | 5471349  | Bergamottin                   | -6.756 | -4.582 | Relatively Low |
| 1507 | 91453    | Hecogenin                     | -5.55  | -4.581 | Relatively Low |
| 1508 | 5003667  | Naringenin trimethyl<br>ether | -6.315 | -4.58  | Relatively Low |
| 1509 | 5281758  | Beta-Asarone                  | -4.807 | -4.579 | Relatively Low |
| 1510 | 644019   | Cannabidiol                   | -4.722 | -4.576 | Relatively Low |
| 1511 | 9942292  | Osmundacetone                 | -5.031 | -4.575 | Relatively Low |
| 1512 | 68289    | Sesamol                       | -5.822 | -4.574 | Relatively Low |
| 1513 | 5881     | Dehydroepiandrosterone        | -5.957 | -4.573 | Relatively Low |
| 1514 | 73581    | Bilobalide A                  | -5.729 | -4.573 | Relatively Low |
| 1515 | 6047     | Levodopa                      | -4.94  | -4.572 | Relatively Low |
| 1516 | 9974762  | Diosbulbin B                  | -4.635 | -4.572 | Relatively Low |
| 1517 | 11724027 | Guaiacin                      | -5.9   | -4.572 | Relatively Low |
| 1518 | 21669994 | Angelol A                     | -5.511 | -4.569 | Relatively Low |
| 1519 | 6452086  | Alpha Cyperone                | -5.564 | -4.565 | Relatively Low |

|      |          |                                               |        |        |                |
|------|----------|-----------------------------------------------|--------|--------|----------------|
| 1520 | 44150282 | Stachydrine<br>hydrochloride                  | -4.89  | -4.561 | Relatively Low |
| 1521 | 5281697  | Scutellarein                                  | -7.511 | -4.56  | Relatively Low |
| 1522 | 20485    | Tabersonine                                   | -5.352 | -4.558 | Relatively Low |
| 1523 | 442972   | Cyclopamine                                   | -4.703 | -4.557 | Relatively Low |
| 1524 | 5284513  | Acitretin                                     | -5.847 | -4.553 | Relatively Low |
| 1525 | 479501   | Acetylshikonin                                | -6.606 | -4.552 | Relatively Low |
| 1526 | 5420895  | 5-hydroxy-7-<br>acetoxylysaccharidesavon<br>e | -5.571 | -4.55  | Relatively Low |
| 1527 | 259991   | Telocinobufagin                               | -5.057 | -4.546 | Relatively Low |
| 1528 | 79050    | 1-Monomyristin                                | -5.251 | -4.546 | Relatively Low |
| 1529 | 14036811 | Alisol B Acetate                              | -4.031 | -4.545 | Relatively Low |
| 1530 | 15120074 | Seneciphyllinine                              | -5.991 | -4.545 | Relatively Low |
| 1531 | 6442619  | Seneciphylline N-Oxide                        | -5.559 | -4.539 | Relatively Low |
| 1532 | 443028   | Yangambin                                     | -5.231 | -4.534 | Relatively Low |
| 1533 | 7428     | Methyl gallate                                | -5.475 | -4.534 | Relatively Low |
| 1534 | 10228    | Osthol                                        | -5.751 | -4.533 | Relatively Low |
| 1535 | 2734290  | 5-Methyl-7-methoxyisof<br>lavone              | -6.781 | -4.528 | Relatively Low |
| 1536 | 10947    | Muscone                                       | -5.359 | -4.527 | Relatively Low |
| 1537 | 73554029 | Sinapine thiocyanate                          | -6.649 | -4.525 | Relatively Low |
| 1538 | 5316132  | Crocetine dimethyl<br>ester                   | -5.383 | -4.524 | Relatively Low |
| 1539 | 821449   | Cnidilin                                      | -6.091 | -4.524 | Relatively Low |
| 1540 | 442127   | Decursinol                                    | -7.205 | -4.523 | Relatively Low |



|      |           |                               |        |        |                |
|------|-----------|-------------------------------|--------|--------|----------------|
| 1541 | 2758      | Eucalyptol                    | -4.574 | -4.52  | Relatively Low |
| 1542 | 476856    | meso-dihydroguaiaretic acid   | -6.099 | -4.519 | Relatively Low |
| 1543 | 5281120   | Nervonic Acid                 | -4.684 | -4.518 | Relatively Low |
| 1544 | 160921    | Lysionotin                    | -6.378 | -4.516 | Relatively Low |
| 1545 | 139291057 | 3-O-Acetyl-20-hydroxyecdysone | -5.227 | -4.516 | Relatively Low |
| 1546 | 98570     | Allocryptopine                | -4.981 | -4.513 | Relatively Low |
| 1547 | 15558616  | Alisol A                      | -5.015 | -4.512 | Relatively Low |
| 1548 | 127       | 4-Hydroxyphenylacetic acid    | -5.547 | -4.511 | Relatively Low |
| 1549 | 6918670   | Ingenol 3-Angelate            | -4.624 | -4.511 | Relatively Low |
| 1550 | 5316810   | Dehydroeffusol                | -6.999 | -4.507 | Relatively Low |
| 1551 | 72303     | Honokiol                      | -6.73  | -4.505 | Relatively Low |
| 1552 | 441074    | Quinidine                     | -5.11  | -4.505 | Relatively Low |
| 1553 | 736681    | Ferulic acid ethyl ester      | -5.387 | -4.503 | Relatively Low |
| 1554 | 65366     | Baccatin III                  | -4.463 | -4.502 | Relatively Low |
| 1555 | 91895364  | Moluccanin                    | -6.607 | -4.502 | Relatively Low |
| 1556 | 91503     | Hydroquinidine                | -5.896 | -4.5   | Relatively Low |
| 1557 | 183466    | 3'-Demethylnobiletin          | -6.174 | -4.5   | Relatively Low |
| 1558 | 177015    | Acetylcorynoline              | -4.159 | -4.499 | Relatively Low |
| 1559 | 876160    | Isoeugenol acetate            | -5.123 | -4.497 | Relatively Low |
| 1560 | 14583584  | $\beta$ -Anhydroicaritin      | -5.732 | -4.492 | Relatively Low |
| 1561 | 479503    | Shikonin                      | -6.978 | -4.492 | Relatively Low |
| 1562 | 13909684  | Chikusetsusaponin IVa         | -5.174 | -4.49  | Relatively Low |

|      |          |                                     |        |        |                |
|------|----------|-------------------------------------|--------|--------|----------------|
| 1563 | 5319502  | 4-Methyl-6,7-dihydroxycoumarin      | -6.327 | -4.489 | Relatively Low |
| 1564 | 3080635  | Atractylon                          | -5.95  | -4.487 | Relatively Low |
| 1565 | 25256772 | Protostemonine                      | -5.446 | -4.487 | Relatively Low |
| 1566 | 10091424 | Corynoxine B                        | -4.61  | -4.485 | Relatively Low |
| 1567 | 479502   | Beta-Hydroxylsovalerylshikonicin    | -5.852 | -4.483 | Relatively Low |
| 1568 | 5471852  | Poricoic acid B                     | -4.877 | -4.482 | Relatively Low |
| 1569 | 7251185  | Parthenolide                        | -5.151 | -4.481 | Relatively Low |
| 1570 | 356759   | Erianin                             | -5.601 | -4.481 | Relatively Low |
| 1571 | 7118     | Veratryl alcohol                    | -5.371 | -4.48  | Relatively Low |
| 1572 | 276389   | Harringtonine                       | -6.252 | -4.48  | Relatively Low |
| 1573 | 10471963 | glaucocalyxin A                     | -5.458 | -4.479 | Relatively Low |
| 1574 | 19009    | Palmatine                           | -5.085 | -4.478 | Relatively Low |
| 1575 | 5281224  | Astaxanthin                         | -6.007 | -4.478 | Relatively Low |
| 1576 | 21120798 | O-glucopyranosylepiederingenin, 28- | -4.752 | -4.478 | Relatively Low |
| 1577 | 24721564 | Denudatine                          | -5.287 | -4.478 | Relatively Low |
| 1578 | 34781    | Dehydrocorydalin                    | -5.603 | -4.475 | Relatively Low |
| 1579 | 92043243 | Dehydrocorydaline nitrate           | -5.603 | -4.475 | Relatively Low |
| 1580 | 34458    | Tetrahydroberberine                 | -5.212 | -4.475 | Relatively Low |
| 1581 | 21631105 | Oxypaeoniflorin                     | -5.53  | -4.474 | Relatively Low |

|      |          |                                |        |        |                |
|------|----------|--------------------------------|--------|--------|----------------|
| 1582 | 2703     | Chelerythrine                  | -6.5   | -4.473 | Relatively Low |
| 1583 | 547      | 3,4-Dihydroxyphenylacetic acid | -5.67  | -4.47  | Relatively Low |
| 1584 | 265237   | Withaferin A                   | -5.582 | -4.468 | Relatively Low |
| 1585 | 471002   | Ganoderic Acid A               | -4.603 | -4.46  | Relatively Low |
| 1586 | 23915    | Schizandrol A                  | -5.071 | -4.456 | Relatively Low |
| 1587 | 91826818 | Benzoylgomisin O               | -5.109 | -4.454 | Relatively Low |
| 1588 | 11992083 | EGCG Octaacetate               | -6.883 | -4.454 | Relatively Low |
| 1589 | 154417   | Hyoscyamine                    | -6.222 | -4.454 | Relatively Low |
| 1590 | 11479437 | Hyoscyamine sulfate hydrate    | -6.196 | -4.448 | Relatively Low |
| 1591 | 26204131 | Angeloylgomisin H              | -5.012 | -4.447 | Relatively Low |
| 1592 | 75528891 | Inulicin                       | -5.023 | -4.446 | Relatively Low |
| 1593 | 243725   | Dihydrorotenone                | -5.655 | -4.441 | Relatively Low |
| 1594 | 5317235  | 6-Ethoxysanguinarine           | -4.739 | -4.437 | Relatively Low |
| 1595 | 158477   | Wilforlide A                   | -4.369 | -4.437 | Relatively Low |
| 1596 | 119287   | Cucurbitacin S                 | -4.047 | -4.433 | Relatively Low |
| 1597 | 6450191  | Linderalactone                 | -5.233 | -4.431 | Relatively Low |
| 1598 | 11969542 | Cinobufagin                    | -4.443 | -4.431 | Relatively Low |
| 1599 | 108168   | Aristolochic Acid B            | -5.884 | -4.43  | Relatively Low |
| 1600 | 24868376 | 7-beta-Hydroxylathyrol         | -5.077 | -4.429 | Relatively Low |
| 1601 | 90472238 | Ginsenoside RK2                | -4.436 | -4.421 | Relatively Low |
| 1602 | 185481   | Evodol                         | -4.65  | -4.419 | Relatively Low |
| 1603 | 9547215  | Bufalin                        | -5.096 | -4.417 | Relatively Low |
| 1604 | 5459840  | Beta-Ecdysterone               | -4.872 | -4.416 | Relatively Low |

|      |           |                                   |        |        |                |
|------|-----------|-----------------------------------|--------|--------|----------------|
| 1605 | 15541911  | Cimigenol-3-O-alpha-L-arabinoside | -5.891 | -4.415 | Relatively Low |
| 1606 | 44258296  | Kuwanon A                         | -6.56  | -4.414 | Relatively Low |
| 1607 | 260439    | Cyclovirobuxine D                 | -5.746 | -4.413 | Relatively Low |
| 1608 | 10043694  | Cnidicin                          | -6.284 | -4.413 | Relatively Low |
| 1609 | 73659     | Maslinic acid                     | -3.716 | -4.411 | Relatively Low |
| 1610 | 91864462  | Angeloylgomisin O                 | -4.603 | -4.405 | Relatively Low |
| 1611 | 72307     | Sesamin                           | -5.879 | -4.398 | Relatively Low |
| 1612 | 102212087 | Lancifodilactone F                | -5.215 | -4.397 | Relatively Low |
| 1613 | 138112783 | Gomisin H                         | -5.436 | -4.391 | Relatively Low |
| 1614 | 5317228   | 6-Ethoxychelerthrine              | -5.732 | -4.39  | Relatively Low |
| 1615 | 1023495   | Dihydropalmatine                  | -5.422 | -4.389 | Relatively Low |
| 1616 | 13934282  | Ganoderal A                       | -4.48  | -4.384 | Relatively Low |
| 1617 | 14057196  | 4',7-Di-O-methylnaringenin        | -6.815 | -4.383 | Relatively Low |
| 1618 | 64945     | Ursolic acid                      | -5.183 | -4.383 | Relatively Low |
| 1619 | 100780    | Nepodin                           | -5.473 | -4.383 | Relatively Low |
| 1620 | 38347601  | DL-Praeruptorin A                 | -5.604 | -4.382 | Relatively Low |
| 1621 | 5280385   | Sinapine                          | -5.93  | -4.382 | Relatively Low |
| 1622 | 93009     | Bornyl acetate                    | -4.549 | -4.38  | Relatively Low |
| 1623 | 16020000  | Cimigenol                         | -4.248 | -4.377 | Relatively Low |
| 1624 | 15376     | Vincamine                         | -6.125 | -4.375 | Relatively Low |
| 1625 | 72321     | Coptisine Chloride                | -7.433 | -4.369 | Relatively Low |
| 1626 | 72322     | Coptisine sulfate                 | -7.433 | -4.369 | Relatively Low |
| 1627 | 441813    | Bryodulcosigenin                  | -4.548 | -4.367 | Relatively Low |
| 1628 | 13968328  | Regelidine                        | -6.765 | -4.366 | Relatively Low |

|      |           |                             |        |        |                |
|------|-----------|-----------------------------|--------|--------|----------------|
| 1629 | 163263    | Sclareol                    | -5.15  | -4.365 | Relatively Low |
| 1630 | 247       | Betaine                     | -4.553 | -4.364 | Relatively Low |
| 1631 | 11545     | Betaine hydrochloride       | -4.553 | -4.364 | Relatively Low |
| 1632 | 637542    | p-Coumaric acid             | -3.889 | -4.363 | Relatively Low |
| 1633 | 642376    | 3-Butylidenephthalide       | -6.284 | -4.363 | Relatively Low |
| 1634 | 99516     | Tigogenin                   | -5.53  | -4.361 | Relatively Low |
| 1635 | 73294     | Ganodermanondiol            | -4.959 | -4.36  | Relatively Low |
| 1636 | 119093    | Cynaropicrin                | -5.308 | -4.359 | Relatively Low |
| 1637 | 9877482   | Norcantharidin              | -5.883 | -4.357 | Relatively Low |
| 1638 | 10074228  | Flemiphilippinin A          | -5.21  | -4.353 | Relatively Low |
| 1639 | 73432     | Brusatol                    | -4.203 | -4.353 | Relatively Low |
| 1640 | 188289    | Columbin                    | -5.907 | -4.351 | Relatively Low |
| 1641 | 6918114   | 11-Keto-beta-boswellic acid | -3.103 | -4.349 | Relatively Low |
| 1642 | 10248     | Elemicin                    | -4.871 | -4.348 | Relatively Low |
| 1643 | 596894    | Kakuol                      | -5.768 | -4.348 | Relatively Low |
| 1644 | 10466307  | Loganetin                   | -5.351 | -4.342 | Relatively Low |
| 1645 | 148670    | 13-methylberberine          | -5.242 | -4.34  | Relatively Low |
| 1646 | 418033    | Dihydrowithaferin A         | -5.041 | -4.336 | Relatively Low |
| 1647 | 179651    | Limonin                     | -4.475 | -4.335 | Relatively Low |
| 1648 | 102004923 | 1-O-acetylbritannilactone   | -5.283 | -4.33  | Relatively Low |
| 1649 | 9848024   | Neoandrographolide          | -5.612 | -4.33  | Relatively Low |
| 1650 | 6287      | L-Valine                    | -4.453 | -4.33  | Relatively Low |
| 1651 | 440080    | 1-Kestose                   | -5.314 | -4.329 | Relatively Low |
| 1652 | 11624161  | 14-Deoxyandrographoli       | -5.247 | -4.328 | Relatively Low |

|      |          |                                                       |        |        |                |
|------|----------|-------------------------------------------------------|--------|--------|----------------|
|      |          | de                                                    |        |        |                |
| 1653 | 92785    | Taraxerone                                            | -3.757 | -4.324 | Relatively Low |
| 1654 | 20056131 | Maoecrystal A                                         | -5.63  | -4.316 | Relatively Low |
| 1655 | 92231    | Spathulenol                                           | -5.033 | -4.315 | Relatively Low |
| 1656 | 12300142 | Bisabolangelone                                       | -6.819 | -4.308 | Relatively Low |
| 1657 | 354616   | Gentiannine                                           | -5.391 | -4.306 | Relatively Low |
| 1658 | 237332   | 5-Hydroxymethylfurfural                               | -4.884 | -4.305 | Relatively Low |
| 1659 | 467319   | Epitheaflagallin<br>3-O-gallate                       | -7.572 | -4.303 | Relatively Low |
| 1660 | 145742   | L-Proline                                             | -5.256 | -4.301 | Relatively Low |
| 1661 | 46783795 | Nomilin                                               | -4.57  | -4.3   | Relatively Low |
| 1662 | 14704104 | Hydroxyphenethylanisat<br>e, 4-                       | -6.253 | -4.299 | Relatively Low |
| 1663 | 90453    | Cinchonine<br>hydrochloride                           | -6.735 | -4.298 | Relatively Low |
| 1664 | 6540717  | Dehydroandrographolid<br>e<br>succinate               | -3.504 | -4.297 | Relatively Low |
| 1665 | 23685777 | Dehydroandrographolid<br>e<br>Succinate Potasium Salt | -3.504 | -4.297 | Relatively Low |
| 1666 | 65411    | Triptonide                                            | -4.943 | -4.295 | Relatively Low |
| 1667 | 21598997 | 3-Deoxyaconitine                                      | -3.55  | -4.295 | Relatively Low |
| 1668 | 21679042 | Deoxyandrographolide                                  | -5.298 | -4.294 | Relatively Low |
| 1669 | 637775   | Sinapic acid                                          | -4.873 | -4.292 | Relatively Low |

|      |          |                                   |        |        |                |
|------|----------|-----------------------------------|--------|--------|----------------|
| 1670 | 634470   | Schizandrol B                     | -5.481 | -4.289 | Relatively Low |
| 1671 | 98914    | Deoxyshikonin                     | -6.832 | -4.286 | Relatively Low |
| 1672 | 72300    | Magnolol                          | -5.961 | -4.286 | Relatively Low |
| 1673 | 124039   | Fraxinellone                      | -5.849 | -4.284 | Relatively Low |
| 1674 | 14656910 | Arnicolide C                      | -4.653 | -4.277 | Relatively Low |
| 1675 | 168114   | 8-Gingerol                        | -5.721 | -4.276 | Relatively Low |
| 1676 | 122797   | 4'-Demethylepipodophyl<br>lotoxin | -5.692 | -4.275 | Relatively Low |
| 1677 | 71307574 | Schizantharin B                   | -4.505 | -4.273 | Relatively Low |
| 1678 | 72301    | L-Tetrahydropalmitine             | -5.555 | -4.273 | Relatively Low |
| 1679 | 91510    | Maackiain                         | -6.126 | -4.271 | Relatively Low |
| 1680 | 185786   | Ergolide                          | -5.671 | -4.27  | Relatively Low |
| 1681 | 6475945  | Demethylpseudolaric<br>acid B     | -4.482 | -4.26  | Relatively Low |
| 1682 | 71300866 | Bullatine A                       | -4.373 | -4.259 | Relatively Low |
| 1683 | 21599000 | 3-Acetylaconitine                 | -4.094 | -4.257 | Relatively Low |
| 1684 | 1023768  | Hypocrellin B                     | -6.801 | -4.256 | Relatively Low |
| 1685 | 773630   | Piperlotine A                     | -6.655 | -4.254 | Relatively Low |
| 1686 | 54695756 | Pogostone                         | -5.032 | -4.254 | Relatively Low |
| 1687 | 442126   | Decursin                          | -5.541 | -4.252 | Relatively Low |
| 1688 | 3085257  | Senkyunolide A                    | -5.234 | -4.252 | Relatively Low |
| 1689 | 629964   | 6-Demethoxytangeretin             | -6.062 | -4.246 | Relatively Low |
| 1690 | 92097    | Taraxerol                         | -3.881 | -4.246 | Relatively Low |
| 1691 | 8434     | Ethylparaben                      | -4.858 | -4.246 | Relatively Low |
| 1692 | 5319022  | Z-Ligustilide                     | -5.95  | -4.245 | Relatively Low |
| 1693 | 14193399 | Glaucoalyxin B                    | -4.643 | -4.239 | Relatively Low |

|      |          |                                   |        |        |                |
|------|----------|-----------------------------------|--------|--------|----------------|
| 1694 | 6918774  | Corosolic acid                    | -3.38  | -4.238 | Relatively Low |
| 1695 | 5319081  | Loureirin A                       | -6.632 | -4.237 | Relatively Low |
| 1696 | 70698035 | Levistilide A                     | -5.412 | -4.235 | Relatively Low |
| 1697 | 12314399 | Platycodigenin                    | -3.202 | -4.23  | Relatively Low |
| 1698 | 161954   | Jolkinolide B                     | -4.327 | -4.219 | Relatively Low |
| 1699 | 6852391  | Scopolamine<br>butylbromide       | -6.057 | -4.217 | Relatively Low |
| 1700 | 71773126 | Ziyuglycoside II                  | -4.641 | -4.21  | Relatively Low |
| 1701 | 21648    | Raspberry Ketone                  | -5.142 | -4.209 | Relatively Low |
| 1702 | 11066    | Berlambine                        | -5.548 | -4.208 | Relatively Low |
| 1703 | 53232    | Lovastatin                        | -5.225 | -4.208 | Relatively Low |
| 1704 | 16666    | L-Menthol                         | -5.316 | -4.206 | Relatively Low |
| 1705 | 6251     | D-Mannitol                        | -4.11  | -4.203 | Relatively Low |
| 1706 | 9934504  | 20-O-Acetylingenol-3-a<br>ngelate | -4.684 | -4.2   | Relatively Low |
| 1707 | 473252   | Isomeranzin                       | -5.95  | -4.2   | Relatively Low |
| 1708 | 119307   | Ginsenoside Rh2                   | -4.511 | -4.197 | Relatively Low |
| 1709 | 72521    | Alkannin                          | -7.14  | -4.197 | Relatively Low |
| 1710 | 441727   | Delsoline                         | -5.928 | -4.189 | Relatively Low |
| 1711 | 6543478  | Arteannuin B                      | -5.589 | -4.182 | Relatively Low |
| 1712 | 5273621  | Demethoxyyangonin                 | -6.206 | -4.181 | Relatively Low |
| 1713 | 24721223 | Lathyrol                          | -5.476 | -4.181 | Relatively Low |
| 1714 | 442827   | Trifolirhizin                     | -5.847 | -4.18  | Relatively Low |
| 1715 | 485077   | Dihydrochelerythrine              | -5.679 | -4.177 | Relatively Low |
| 1716 | 3001686  | Gomisin J                         | -5.436 | -4.176 | Relatively Low |
| 1717 | 6433206  | Sulforaphene                      | -3.88  | -4.175 | Relatively Low |



|      |          |                                                  |        |        |                |
|------|----------|--------------------------------------------------|--------|--------|----------------|
| 1718 | 10098    | Jervine                                          | -4.636 | -4.175 | Relatively Low |
| 1719 | 154272   | 10-deacetylbaecatin<br>III                       | -4.416 | -4.173 | Relatively Low |
| 1720 | 10287099 | Disodium<br>trans-crocetinate                    | -4.787 | -4.172 | Relatively Low |
| 1721 | 2353     | Berberine                                        | -5.522 | -4.16  | Relatively Low |
| 1722 | 12456    | Berberine<br>hydrochloride                       | -5.522 | -4.16  | Relatively Low |
| 1723 | 12457    | Berberine Sulfate                                | -5.522 | -4.16  | Relatively Low |
| 1724 | 11969465 | Marinobufagin                                    | -4.483 | -4.155 | Relatively Low |
| 1725 | 3083590  | Phillygenin                                      | -6.3   | -4.147 | Relatively Low |
| 1726 | 3084708  | groenlandicine                                   | -6.791 | -4.147 | Relatively Low |
| 1727 | 68313    | Hordenine                                        | -5.869 | -4.146 | Relatively Low |
| 1728 | 101301   | Corydaline                                       | -6.354 | -4.146 | Relatively Low |
| 1729 | 99474    | Diosgenin                                        | -5.937 | -4.144 | Relatively Low |
| 1730 | 10607    | Podophyllotoxin                                  | -6.254 | -4.137 | Relatively Low |
| 1731 | 10001602 | Isoforskolin                                     | -5.855 | -4.136 | Relatively Low |
| 1732 | 14992067 | Gomisin G                                        | -5.602 | -4.135 | Relatively Low |
| 1733 | 68742556 | (9Z,12Z)-N-Benzylocta<br>deca-<br>9,12-dienamide | -6.282 | -4.134 | Relatively Low |
| 1734 | 10394    | Phloretic acid                                   | -5.047 | -4.128 | Relatively Low |
| 1735 | 6438196  | Bacdanol                                         | -4.581 | -4.125 | Relatively Low |
| 1736 | 11090206 | Tokinolide B                                     | -4.253 | -4.125 | Relatively Low |
| 1737 | 133504   | Schinifoline                                     | -6.097 | -4.122 | Relatively Low |
| 1738 | 89594    | L-Nicotine                                       | -4.966 | -4.118 | Relatively Low |

|      |          |                                             |        |        |                |
|------|----------|---------------------------------------------|--------|--------|----------------|
| 1739 | 6267     | L-Asparagine                                | -4.503 | -4.116 | Relatively Low |
| 1740 | 444679   | Ergosterol                                  | -5.447 | -4.113 | Relatively Low |
| 1741 | 345501   | Deoxypodophyllotoxin                        | -6.256 | -4.11  | Relatively Low |
| 1742 | 12442765 | Polygalic Acid                              | -3.391 | -4.109 | Relatively Low |
| 1743 | 78577438 | Dehydroandrographolid<br>e                  | -5.796 | -4.107 | Relatively Low |
| 1744 | 155011   | Aurantioobtusin                             | -5.317 | -4.106 | Relatively Low |
| 1745 | 108130   | Schisandrin B                               | -6.312 | -4.104 | Relatively Low |
| 1746 | 821366   | L-Sinoacutine                               | -6.138 | -4.098 | Relatively Low |
| 1747 | 442495   | Pulegone                                    | -5.961 | -4.092 | Relatively Low |
| 1748 | 2236     | Aristolochic acid A                         | -5.809 | -4.09  | Relatively Low |
| 1749 | 11468733 | (20S)-Protopanaxatriol                      | -4.681 | -4.089 | Relatively Low |
| 1750 | 864      | $\alpha$ -Lipoic acid                       | -4.68  | -4.084 | Relatively Low |
| 1751 | 10114    | Glycyrrhetic acid                           | -3.337 | -4.08  | Relatively Low |
| 1752 | 76314443 | Alisol G                                    | -4.209 | -4.078 | Relatively Low |
| 1753 | 6475946  | demethoxydeacetoxypse<br>udolaric<br>acid B | -4.395 | -4.072 | Relatively Low |
| 1754 | 5280794  | Stigmasterol                                | -5.09  | -4.069 | Relatively Low |
| 1755 | 12118082 | Monascin                                    | -6.897 | -4.066 | Relatively Low |
| 1756 | 443955   | Vinpocetine                                 | -5.714 | -4.065 | Relatively Low |
| 1757 | 73401    | Marrubiin                                   | -5.812 | -4.063 | Relatively Low |
| 1758 | 5315892  | Cinnamyl Alcohol                            | -4.98  | -4.063 | Relatively Low |
| 1759 | 11869658 | 3-Epioleanolic acid                         | -4.515 | -4.05  | Relatively Low |
| 1760 | 5320113  | Danshenxinkun B                             | -5.898 | -4.049 | Relatively Low |
| 1761 | 168136   | Nardosinone                                 | -4.352 | -4.047 | Relatively Low |

|      |           |                                    |        |        |                |
|------|-----------|------------------------------------|--------|--------|----------------|
| 1762 | 101671038 | Hypaconine                         | -5.132 | -4.043 | Relatively Low |
| 1763 | 82755     | Hydroxytyrosol                     | -5.433 | -4.039 | Relatively Low |
| 1764 | 101810    | Quillaic acid                      | -4.361 | -4.039 | Relatively Low |
| 1765 | 220495    | N-Benzylstearamide                 | -4.547 | -4.038 | Relatively Low |
| 1766 | 68316     | Perillene                          | -4.312 | -4.034 | Relatively Low |
| 1767 | 9817839   | Dehydroevodiamine                  | -6.892 | -4.029 | Relatively Low |
| 1768 | 135393457 | Dehydroevodiamine<br>hydrochloride | -6.892 | -4.029 | Relatively Low |
| 1769 | 102004667 | Incensole                          | -4.199 | -4.028 | Relatively Low |
| 1770 | 124928704 | O-Tigloylgymnemagenin,<br>21-      | -5.932 | -4.024 | Relatively Low |
| 1771 | 7127      | Methyleugenol                      | -4.769 | -4.021 | Relatively Low |
| 1772 | 14466541  | Britannin                          | -6.147 | -4.009 | Relatively Low |
| 1773 | 73412     | Madecassic acid                    | -4.343 | -4.007 | Relatively Low |
| 1774 | 11725801  | Sauchinone                         | -4.829 | -4.006 | Relatively Low |
| 1775 | 158103    | Gomisin N                          | -5.009 | -4.004 | Relatively Low |
| 1776 | 12315259  | Santalol                           | -5.264 | -4.001 | Relatively Low |
| 1777 | 155256    | Schisandrin A                      | -6.267 | -3.995 | Relatively Low |
| 1778 | 76310822  | Alisol F                           | -5.705 | -3.995 | Relatively Low |
| 1779 | 5470187   | Zerumbone                          | -5.189 | -3.989 | Relatively Low |
| 1780 | 142768    | etin dimethyl ether?               | -5.586 | -3.988 | Relatively Low |
| 1781 | 5281650   | Alpha-Mangostin                    | -5.511 | -3.987 | Relatively Low |
| 1782 | 431129    | Asatone                            | -4.095 | -3.985 | Relatively Low |
| 1783 | 91472     | Friedelin                          | -3.652 | -3.985 | Relatively Low |
| 1784 | 125       | 4-Hydroxybenzyl<br>alcohol         | -6.055 | -3.978 | Relatively Low |

|      |          |                                           |        |        |                |
|------|----------|-------------------------------------------|--------|--------|----------------|
| 1785 | 6434600  | Isopropyl ferulate                        | -5.279 | -3.972 | Relatively Low |
| 1786 | 3032313  | Epigoitrin                                | -6.444 | -3.972 | Relatively Low |
| 1787 | 9301     | Arecoline<br>hydrobromide                 | -5.172 | -3.969 | Relatively Low |
| 1788 | 7163177  | 3-Epiursolic acid                         | -3.997 | -3.968 | Relatively Low |
| 1789 | 72311    | Chelerythrine chloride                    | -6.251 | -3.964 | Relatively Low |
| 1790 | 88311768 | $\beta$ -Croctin                          | -5.023 | -3.961 | Relatively Low |
| 1791 | 23247892 | Lucidenic Acid E2                         | -4.104 | -3.952 | Relatively Low |
| 1792 | 73309    | Echinocystic acid                         | -3.802 | -3.951 | Relatively Low |
| 1793 | 3503     | Gossypol                                  | -4.739 | -3.941 | Relatively Low |
| 1794 | 6440704  | Pseudolaric Acid C                        | -3.698 | -3.935 | Relatively Low |
| 1795 | 13943286 | Cycloastragenol                           | -4.293 | -3.929 | Relatively Low |
| 1796 | 4947     | Propyl gallate                            | -5.202 | -3.921 | Relatively Low |
| 1797 | 444539   | Cinnamic acid                             | -4.182 | -3.918 | Relatively Low |
| 1798 | 71522011 | Valechlorine                              | -5.54  | -3.918 | Relatively Low |
| 1799 | 235307   | Obtucarbamate A                           | -5.475 | -3.908 | Relatively Low |
| 1800 | 442720   | Dimethylacrylalkannin,<br>$\beta,\beta$ - | -6.321 | -3.905 | Relatively Low |
| 1801 | 13889352 | Taraxasteryl acetate                      | -4.018 | -3.904 | Relatively Low |
| 1802 | 5281425  | Pteryxin                                  | -5.933 | -3.902 | Relatively Low |
| 1803 | 5281331  | Alpha-Spinasterol                         | -5.911 | -3.898 | Relatively Low |
| 1804 | 10367978 | Heteroclitin D                            | -3.228 | -3.895 | Relatively Low |
| 1805 | 12305221 | Bayogenin                                 | -3.032 | -3.887 | Relatively Low |
| 1806 | 227456   | Acetate gossypol                          | -4.605 | -3.884 | Relatively Low |
| 1807 | 3314     | Eugenol                                   | -4.567 | -3.881 | Relatively Low |
| 1808 | 6436348  | Germacrone                                | -4.748 | -3.877 | Relatively Low |

|      |          |                                              |        |        |                |
|------|----------|----------------------------------------------|--------|--------|----------------|
| 1809 | 59054177 | Blinin                                       | -6.09  | -3.877 | Relatively Low |
| 1810 | 155240   | Hydroxytyrosol<br>Acetate                    | -4.821 | -3.875 | Relatively Low |
| 1811 | 73057    | Schisanhenol                                 | -5.829 | -3.875 | Relatively Low |
| 1812 | 21672692 | Anemosapogenin                               | -3.344 | -3.875 | Relatively Low |
| 1813 | 15940183 | Euphorbiasteroid                             | -2.48  | -3.859 | Relatively Low |
| 1814 | 47936    | Forskolin                                    | -5.352 | -3.841 | Relatively Low |
| 1815 | 51666243 | Angelol K                                    | -6.198 | -3.841 | Relatively Low |
| 1816 | 173183   | Campesterol                                  | -3.829 | -3.831 | Relatively Low |
| 1817 | 5469634  | Ginkgolic Acid C17-1                         | -5.683 | -3.82  | Relatively Low |
| 1818 | 46173999 | Clemaphenol A                                | -5.861 | -3.816 | Relatively Low |
| 1819 | 101749   | Galgravin                                    | -6.849 | -3.809 | Relatively Low |
| 1820 | 9847853  | (20R)-Protopanaxatriol                       | -3.954 | -3.805 | Relatively Low |
| 1821 | 10322911 | Demethylzeylasteral                          | -5.142 | -3.792 | Relatively Low |
| 1822 | 119242   | Epifriedelanol                               | -4.954 | -3.791 | Relatively Low |
| 1823 | 21709636 | 1-Methyl-2-pentyl-4(1H)<br>)-<br>quinolinone | -6.464 | -3.783 | Relatively Low |
| 1824 | 5319964  | Murrayone                                    | -5.311 | -3.779 | Relatively Low |
| 1825 | 9750     | L-Citrulline                                 | -4.027 | -3.774 | Relatively Low |
| 1826 | 119      | Gamma-Aminobutyric<br>acid                   | -4.693 | -3.773 | Relatively Low |
| 1827 | 6760     | Skimmianine                                  | -6.354 | -3.77  | Relatively Low |
| 1828 | 14240392 | Curcumol                                     | -5.359 | -3.769 | Relatively Low |
| 1829 | 71463992 | Eupalinolide B                               | -4.34  | -3.769 | Relatively Low |
| 1830 | 31234    | Hydrocinnamyl alcohol                        | -4.476 | -3.762 | Relatively Low |

|      |           |                                     |        |        |                |
|------|-----------|-------------------------------------|--------|--------|----------------|
| 1831 | 10175     | Cotoin                              | -5.985 | -3.757 | Relatively Low |
| 1832 | 10399139  | Isocurcumenol                       | -5.054 | -3.741 | Relatively Low |
| 1833 | 443027    | Schisandrin C                       | -5.256 | -3.734 | Relatively Low |
| 1834 | 124222343 | Neoprzewaquinone A                  | -4.33  | -3.727 | Relatively Low |
| 1835 | 6288      | L-Threonine                         | -4.093 | -3.722 | Relatively Low |
| 1836 | 2773624   | 4-Hydroxyisoleucine                 | -4.407 | -3.715 | Relatively Low |
| 1837 | 12315075  | Rotundic acid                       | -3.229 | -3.71  | Relatively Low |
| 1838 | 471426    | Euscaphic acid                      | -3.211 | -3.7   | Relatively Low |
| 1839 | 10404245  | Anwuligan                           | -6.678 | -3.698 | Relatively Low |
| 1840 | 9890209   | Ursonic acid                        | -3.778 | -3.698 | Relatively Low |
| 1841 | 7184      | Butyl<br>4-Hydroxybenzoate          | -5.256 | -3.695 | Relatively Low |
| 1842 | 12315507  | Shionone                            | -3.23  | -3.694 | Relatively Low |
| 1843 | 439378    | Theanine                            | -3.846 | -3.689 | Relatively Low |
| 1844 | 74990     | Irinotecan<br>Hydrochloride         | -4.342 | -3.689 | Relatively Low |
| 1845 | 115012    | Soyasapogenol B                     | -3.631 | -3.688 | Relatively Low |
| 1846 | 87310     | Alliin                              | -3.55  | -3.68  | Relatively Low |
| 1847 | 167812    | Curcumenol                          | -5.378 | -3.679 | Relatively Low |
| 1848 | 98608     | Phellopterin                        | -6.1   | -3.676 | Relatively Low |
| 1849 | 10577938  | 5,15-Diacetyl-3-<br>benzoyllathyrol | -2.733 | -3.674 | Relatively Low |
| 1850 | 10955174  | Patchouli alcohol                   | -4.213 | -3.662 | Relatively Low |
| 1851 | 92802     | OLEAN-12-ENE-3B,28<br>-DIOL         | -3.725 | -3.66  | Relatively Low |
| 1852 | 15560302  | Gymnastrogenin                      | -4.897 | -3.657 | Relatively Low |

|      |           |                                            |        |        |                |
|------|-----------|--------------------------------------------|--------|--------|----------------|
| 1853 | 2998      | Nonivamide                                 | -3.822 | -3.656 | Relatively Low |
| 1854 | 6442612   | 10-Shogaol                                 | -5.638 | -3.656 | Relatively Low |
| 1855 | 11850     | Dulcitol                                   | -3.969 | -3.655 | Relatively Low |
| 1856 | 71307581  | Tussilagone                                | -4.935 | -3.649 | Relatively Low |
| 1857 | 5321047   | Atractylodin                               | -4.219 | -3.618 | Relatively Low |
| 1858 | 7991      | N-Valeric acid                             | -3.713 | -3.61  | Relatively Low |
| 1859 | 9805290   | Polyporenic acid C                         | -5.06  | -3.607 | Relatively Low |
| 1860 | 20055812  | Chasmanine                                 | -4.207 | -3.605 | Relatively Low |
| 1861 | 445724    | L-Fucitol                                  | -4.134 | -3.602 | Relatively Low |
| 1862 | 70775     | 2-hydroxychavicol                          | -4.256 | -3.6   | Relatively Low |
| 1863 | 11198769  | Macamide B                                 | -6.607 | -3.598 | Relatively Low |
| 1864 | 222284    | Beta-Sitosterol                            | -4.919 | -3.591 | Relatively Low |
| 1865 | 12442762  | Senegenin                                  | -3.041 | -3.585 | Relatively Low |
| 1866 | 23462     | L-Cysteine<br>hydrochloride<br>monohydrate | -4.177 | -3.571 | Relatively Low |
| 1867 | 637511    | Cinnamaldehyde                             | -4.294 | -3.568 | Relatively Low |
| 1868 | 64971     | Betulinic acid                             | -3.032 | -3.562 | Relatively Low |
| 1869 | 10393     | Tyrosol                                    | -5.081 | -3.551 | Relatively Low |
| 1870 | 26248     | Diacerein                                  | -6.036 | -3.549 | Relatively Low |
| 1871 | 10687292  | Cytosporone B                              | -6.277 | -3.548 | Relatively Low |
| 1872 | 131676044 | Euphorbia factor L1                        | -3.9   | -3.531 | Relatively Low |
| 1873 | 73299     | Hederagenin                                | -3.316 | -3.531 | Relatively Low |
| 1874 | 161388    | Polygalacic acid                           | -3.786 | -3.526 | Relatively Low |
| 1875 | 13250     | Gallic Acid Ethyl<br>Ester                 | -5.096 | -3.513 | Relatively Low |

|      |          |                                                    |        |        |                |
|------|----------|----------------------------------------------------|--------|--------|----------------|
| 1876 | 25717254 | Praeruptorin B                                     | -4.7   | -3.499 | Relatively Low |
| 1877 | 161464   | Leonurine                                          | -4.858 | -3.498 | Relatively Low |
| 1878 | 46837042 | Leonurine<br>Hydrochloride                         | -4.858 | -3.498 | Relatively Low |
| 1879 | 517326   | Sodium<br>dichloroacetate                          | -3.108 | -3.488 | Relatively Low |
| 1880 | 3516     | Guaifenesin                                        | -4.993 | -3.483 | Relatively Low |
| 1881 | 73755086 | Incensole acetate                                  | -4.116 | -3.479 | Relatively Low |
| 1882 | 92158    | Lupenone                                           | -3.33  | -3.468 | Relatively Low |
| 1883 | 12442849 | Soyasapogenol A                                    | -3.86  | -3.467 | Relatively Low |
| 1884 | 776123   | Decursinol angelate                                | -5.756 | -3.453 | Relatively Low |
| 1885 | 12315005 | Roburic Acid                                       | -4.092 | -3.449 | Relatively Low |
| 1886 | 119034   | Asiatic acid                                       | -4.543 | -3.446 | Relatively Low |
| 1887 | 14296    | Chuanxingzine                                      | -4.286 | -3.442 | Relatively Low |
| 1888 | 156709   | Ligustrazine<br>Hydrochloride                      | -4.286 | -3.442 | Relatively Low |
| 1889 | 5962     | L-Lysine                                           | -4.125 | -3.439 | Relatively Low |
| 1890 | 73346080 | N-(3-Methoxybenzyl)ol<br>eamide                    | -5.255 | -3.438 | Relatively Low |
| 1891 | 11213350 | 20(S)-Protopanaxadiol                              | -4.688 | -3.438 | Relatively Low |
| 1892 | 4133     | Methyl salicylate                                  | -5.196 | -3.426 | Relatively Low |
| 1893 | 9958136  | 3-O-Acetyl-16alpha-<br>hydroxytrametenolic<br>acid | -4.393 | -3.421 | Relatively Low |
| 1894 | 159516   | Pristimerin                                        | -4.859 | -3.419 | Relatively Low |
| 1895 | 5281858  | Ginkgolic Acid C15-1                               | -5.491 | -3.417 | Relatively Low |



|      |          |                                           |        |        |                |
|------|----------|-------------------------------------------|--------|--------|----------------|
| 1896 | 441678   | Euphol                                    | -3.88  | -3.414 | Relatively Low |
| 1897 | 53343513 | Protostemotinine                          | -4.552 | -3.411 | Relatively Low |
| 1898 | 161800   | Glycyrrhetic Acid<br>3-O-β-D- Glucuronide | -4.213 | -3.41  | Relatively Low |
| 1899 | 151202   | 3-O-acetyloleanolic<br>acid               | -3.597 | -3.393 | Relatively Low |
| 1900 | 9920281  | 20(R)-Protopanaxadiol                     | -4.88  | -3.389 | Relatively Low |
| 1901 | 123976   | 27-Hydroxycholesterol                     | -6.521 | -3.385 | Relatively Low |
| 1902 | 6475119  | 3-acetylursolic acid                      | -4.247 | -3.376 | Relatively Low |
| 1903 | 125468   | Tiglic acid                               | -3.172 | -3.357 | Relatively Low |
| 1904 | 10359753 | Daidzein Diacetate                        | -3.589 | -3.347 | Relatively Low |
| 1905 | 5281232  | Crocetin                                  | -4.165 | -3.345 | Relatively Low |
| 1906 | 5320692  | Praeruptorin C                            | -5.714 | -3.337 | Relatively Low |
| 1907 | 6440581  | Praeruptorin E                            | -5.506 | -3.33  | Relatively Low |
| 1908 | 157081   | Ingenol-3,4-5,20-diaceto<br>nide          | -3.562 | -3.322 | Relatively Low |
| 1909 | 72326    | Betulin                                   | -4.014 | -3.321 | Relatively Low |
| 1910 | 107982   | Dihydrocapsaicin                          | -5.81  | -3.308 | Relatively Low |
| 1911 | 3083352  | 13-Acetyl-9-dihydrobac<br>catin           | -2.108 | -3.302 | Relatively Low |
| 1912 | 11148    | Glycerol<br>tritradecanoate               | -5.316 | -3.288 | Relatively Low |
| 1913 | 12313704 | Oleanonic acid                            | -4.174 | -3.282 | Relatively Low |
| 1914 | 442436   | valepotriate                              | -6.195 | -3.273 | Relatively Low |
| 1915 | 182140   | Hypophyllanthin                           | -4.976 | -3.262 | Relatively Low |
| 1916 | 14219    | 1,1-Dimethylbiguanide                     | -3.313 | -3.262 | Relatively Low |

|      |          |                         |        |        |                |
|------|----------|-------------------------|--------|--------|----------------|
|      |          | hydrochloride           |        |        |                |
| 1917 | 12444386 | Arjungenin              | -4.272 | -3.261 | Relatively Low |
| 1918 | 73193    | Tormentic acid          | -3.499 | -3.251 | Relatively Low |
| 1919 | 10922465 | Artemisic acid          | -4.477 | -3.25  | Relatively Low |
| 1920 | 65048    | Medicagenic acid        | -3.673 | -3.23  | Relatively Low |
| 1921 | 485711   | 3-Epibetulinic acid     | -3.109 | -3.22  | Relatively Low |
| 1922 | 442793   | 6-Gingerol              | -3.7   | -3.215 | Relatively Low |
| 1923 | 101761   | Erythrodiol             | -5.242 | -3.194 | Relatively Low |
| 1924 | 94225    | Taraxerol acetate       | -3.251 | -3.183 | Relatively Low |
| 1925 | 15559100 | Beta-Elemonic acid      | -3.806 | -3.164 | Relatively Low |
| 1926 | 56833075 | 3-Hydroxybakuchiol      | -4.979 | -3.142 | Relatively Low |
| 1927 | 21594228 | Phytolaccagenin         | -3.446 | -3.138 | Relatively Low |
|      |          | Ingenol-5,20-acetonide- |        |        |                |
| 1928 | 92044470 | 3-O-angelate            | -4.406 | -3.125 | Relatively Low |
| 1929 | 6442560  | 8-Shogaol               | -5.512 | -3.102 | Relatively Low |
| 1930 | 10819    | Perilla alcohol         | -5.84  | -3.084 | Relatively Low |
| 1931 | 122844   | Liquidambaric acid      | -3.21  | -3.084 | Relatively Low |
| 1932 | 9577379  | L-Sulforaphane          | -3.583 | -3.077 | Relatively Low |
| 1933 | 643915   | Angelic acid            | -3.119 | -3.075 | Relatively Low |
| 1934 | 168836   | Nordihydrocapsaicin     | -4.321 | -3.067 | Relatively Low |
| 1935 | 38359583 | Isodeoxyelephantopin    | -6.147 | -3.051 | Relatively Low |
| 1936 | 572766   | Curzerene               | -5.48  | -3.047 | Relatively Low |
| 1937 | 6137     | L-Methionine            | -3.738 | -3.045 | Relatively Low |
|      |          | Pseudolaric Acid        |        |        |                |
| 1938 | 6436278  | A                       | -4.677 | -3.031 | Relatively Low |

|      |           |                                      |        |        |                |
|------|-----------|--------------------------------------|--------|--------|----------------|
| 1939 | 6549      | Linalool                             | -3.88  | -3.025 | Relatively Low |
| 1940 | 441728    | deltaline                            | -3.939 | -3.018 | Relatively Low |
| 1941 | 184492    | 7-Epitaxol                           | -6.213 | -3.007 | Relatively Low |
| 1942 | 11168203  | 3-Acetyl-11-keto-beta-boswellic Acid | -3.913 | -2.985 | Relatively Low |
| 1943 | 44630058  | Angelic anhydride                    | -3.915 | -2.954 | Relatively Low |
| 1944 | 68911     | Artemether                           | -4.871 | -2.92  | Relatively Low |
| 1945 | 134714896 | Isoasatone A                         | -4.602 | -2.919 | Relatively Low |
| 1946 | 122724    | Celastrol                            | -4.755 | -2.91  | Relatively Low |
| 1947 | 68406     | 1-Octacosanol                        | -3.019 | -2.864 | Relatively Low |
| 1948 | 161306    | Ginkgolic Acid C13-0                 | -5.679 | -2.861 | Relatively Low |
| 1949 | 155245    | $\beta$ -acetoxysovalerylalannin     | -6.493 | -2.855 | Relatively Low |
| 1950 | 601100    | Wilforine                            | -5.694 | -2.852 | Relatively Low |
| 1951 | 5468522   | Bakuchiol                            | -4.312 | -2.806 | Relatively Low |
| 1952 | 5280489   | Carotene                             | -4.69  | -2.794 | Relatively Low |
| 1953 | 637566    | Geraniol                             | -4.16  | -2.79  | Relatively Low |
| 1954 | 6322      | L-Arginine                           | -3.374 | -2.751 | Relatively Low |
| 1955 | 46870578  | Hydroxy- $\epsilon$ -sanshool        | -3.252 | -2.708 | Relatively Low |
| 1956 | 10220912  | Hydroxy- $\beta$ -sanshool           | -3.741 | -2.68  | Relatively Low |
| 1957 | 14135317  | Hydroxy- $\gamma$ -sanshool          | -1.972 | -2.573 | Relatively Low |
| 1958 | 5281794   | 6-Shogaol                            | -4.355 | -2.558 | Relatively Low |
| 1959 | 5281326   | Fucosterol                           | -5.026 | -2.42  | Relatively Low |
| 1960 | 8294      | Linalyl Acetate                      | -4.085 | -2.381 | Relatively Low |
| 1961 | 68972     | Triacontanol                         | -3.621 | -2.303 | Relatively Low |
| 1962 | 3218      | Embelin                              | -2.522 | -2.289 | Relatively Low |

|      |          |                             |        |        |                |
|------|----------|-----------------------------|--------|--------|----------------|
| 1963 | 23663544 | Sodium houttuynonate        | -2.223 | -2.229 | Relatively Low |
| 1964 | 5283263  | Falcarindiol                | -3.049 | -2.201 | Relatively Low |
| 1965 | 12409    | Nonacosane                  | -2.466 | -2.199 | Relatively Low |
| 1966 | 61253    | Octyl gallate               | -4.373 | -2.129 | Relatively Low |
| 1967 | 10084135 | Hydroxy- $\alpha$ -sanshool | -3.592 | -2.009 | Relatively Low |
| 1968 | 5962587  | AcetylResveratrol           | -3.675 | -1.955 | Relatively Low |
| 1969 | 5284507  | Nerolidol                   | -2.227 | -1.238 | Relatively Low |
| 1970 | 643684   | Ricinoleic acid             | -2.236 | -1.092 | Relatively Low |
| 1971 | 9940690  | Crocin II                   | -6.19  | -1.014 | Relatively Low |
| 1972 | 126312   | Panaxydol                   | -2.824 | -0.989 | Relatively Low |
| 1973 | 71307573 | Pseudolaric Acid B          | -4.488 | -0.861 | Relatively Low |
| 1974 | 5469789  | Panaxynol                   | -1.434 | -0.429 | Relatively Low |
| 1975 | 985      | Palmitic acid               | -0.582 | 0.695  | Relatively Low |
| 1976 | 11005    | Myristic acid               | -0.258 | 0.71   | Relatively Low |
| 1977 | 8164     | Octyl acetate               | 0.37   | 1.551  | Relatively Low |
| 1978 | 5312738  | Royal jelly acid            | 0.939  | 1.738  | Relatively Low |

We then extended to one TCM natural compounds library to exploiting other unlisted potential ingredients and herbs. 1971 ingredients with the valid docking terminally among 2042 compounds, whose PubChem CID were attached in the side. All docking results, besides seven positive controls, were showed in glide gscore (the lower, the better). In addition, the notes were attached here for indicating the results contrasted with the best control (Ritonavir to 6VSB: -7.828 kcal/mol while Remdesivir to 6LU7: -8.738 kcal/mol). This included High in 6VSB (< -7.828 kcal/mol) / 6LU7 (< -8.738 kcal/mol), High in both (high efficiency in both), Relatively Low (lower efficiency in the both), Control, The Best Control within 6VSB and The Best Control within 6LU7.

**Table S12. The best docking results with the both (6LU7 & 6VSB) among all compounds above.**

| NO. | Compounds CID | Compounds Name                                                                                 | Docking gscore (kcal/mol) 6LU7# | Docking gscore (kcal/mol) 6VSB# | Source Herbs (Abbreviation (Latin Name, Chinese Pinyin)) |
|-----|---------------|------------------------------------------------------------------------------------------------|---------------------------------|---------------------------------|----------------------------------------------------------|
| 1   | 44258007      | Madreselvin B                                                                                  | -9.017                          | -8.588                          | JYH (Lonicerae Japonicae Flos, Jin Yin Hua)              |
| 2   | 123339619     | 5-MethoxyPinocembroside                                                                        | -9.359                          | -10.791                         | GHC ( <i>Penthorum chinense</i> Pursh, Gan Huang Cao)    |
| 3   | 65238         | 1,2,3,4,6-Pentagalloylglucose                                                                  | -8.927                          | -8.889                          | WBZ ( <i>Rhus chinensis</i> Mill., Wu Bei Zi)            |
| 4   | 11664897      | Kaempferol 3-O- $\beta$ -D-(6"-p-coumaroyl) glucopyranosyl (1-2)- $\alpha$ -L-rhamnopyranoside | -11.316                         | -8.732                          | YX (Folium Ginkgo, Yin Xing)                             |

Here we collected the most potential compounds targeting SARS-CoV-2 from the two docking results (8 herbs and 2042 natural compounds), which presented better to the both core structures (6LU7 and 6VSB) compared with controls.

**Table S13. The occupation of SSMs' (symptoms, syndromes and medical conditions) targets within the entire targets database we discussed.**

| <b>SSMs</b>                      | <b>Incorporated Genes</b> | <b>Excluded Genes</b> | <b>Occupations (%)</b> |
|----------------------------------|---------------------------|-----------------------|------------------------|
| SARS                             | 38                        | 48                    | 44.19                  |
| Lymphopenia/Decreased Lymphocyte | 318                       | 340                   | 48.33                  |
| COVID-19                         | 172                       | 176                   | 49.43                  |
| Diarrhea                         | 76                        | 76                    | 50.00                  |
| Pyrexia/Fever                    | 159                       | 153                   | 50.96                  |
| Pneumonia                        | 110                       | 102                   | 51.89                  |
| Myalgia/Muscle Soreness          | 165                       | 150                   | 52.38                  |
| Mucus/Phlegm/Sputum              | 124                       | 106                   | 53.91                  |
| Dyspnea                          | 52                        | 35                    | 59.77                  |
| Asthenia/Fatigue                 | 68                        | 45                    | 60.18                  |
| Cytokine storm                   | 23                        | 14                    | 62.16                  |
| Coughing                         | 32                        | 14                    | 69.57                  |
| Nausea/Vomiting                  | 58                        | 23                    | 71.60                  |
| Oxygen Saturation                | 41                        | 16                    | 71.93                  |
| <b>Average</b>                   |                           |                       | <b>56.88</b>           |

The molecular targets of major SSMs for COVID-19 were obtained from NCBI and Genecards database. COVID-19 was used the same as Fig.3. The targets with correlation score  $\geq 20$  in Genecards and all in NCBI targets were combined after TCMSP filter and duplicates removal, which were shown in the "Incorporated Genes". And "Excluded Genes" indicated the actual eliminates of TCMSP filter. The occupations were calculated from the amounts of incorporated genes divided by the amounts of uneliminated data (incorporated genes add to excluded genes). Here we can see that over 50% were

incorporated in TCMSP largely and the average was 56.88% signed at the bottom, which means a certain targets of SSMs would left after constraining with the TCMSP database. And this data was pictured in Fig 5A.

**Table S14. Coherence analysis between TCM remedies and COVID-19 related SSMs.**

| Recipes                                            | No. of intersection | COVID-19 (172) | No. of intersection | pneumonia (110) | No. of intersection | fatigue (68) | No. of intersection | fever (159) | No. of intersection | Myalgia/ Muscle soreness (165) |
|----------------------------------------------------|---------------------|----------------|---------------------|-----------------|---------------------|--------------|---------------------|-------------|---------------------|--------------------------------|
| SMI (Shengmai Injection) [363]                     | 34                  | 4.27           | 22                  | 2.98            | 30                  | 19.00        | 31                  | 3.77        | 40                  | 8.33                           |
| LSY (Preventive prescription by Liu Shangyi) [382] | 61                  | 24.64          | 44                  | 21.89           | 32                  | 20.48        | 59                  | 25.81       | 63                  | 28.97                          |
| RDNI (Reduning Injection) [447]                    | 69                  | 26.58          | 52                  | 26.68           | 35                  | 20.75        | 64                  | 24.79       | 70                  | 29.83                          |
| SFT (Shenfu Injection) [447]                       | 57                  | 15.06          | 33                  | 7.14            | 32                  | 16.45        | 47                  | 9.67        | 55                  | 14.72                          |
| SJZT (Sijunzi Decoction) [498]                     | 66                  | 19.10          | 42                  | 12.12           | 34                  | 16.34        | 57                  | 14.30       | 66                  | 20.78                          |
| XBCQT (Xuanbai Chengqi Decoction) [507]            | 57                  | 11.51          | 39                  | 9.30            | 35                  | 17.17        | 56                  | 13.01       | 63                  | 17.42                          |
| ECT (Erchen Decoction) [551]                       | 70                  | 18.77          | 47                  | 14.03           | 37                  | 17.50        | 59                  | 12.90       | 70                  | 20.48                          |
| XBJI (Xuebijing Injection) [624]                   | 74                  | 17.36          | 53                  | 15.96           | 39                  | 16.58        | 67                  | 14.99       | 75                  | 19.88                          |
| HXZQ (Huoxiang Zhengqi Powder) [728]               | 86                  | 20.57          | 63                  | 20.26           | 41                  | 14.78        | 80                  | 19.41       | 85                  | 21.75                          |
| YPFS (Yupingfeng Powder) [780]                     | 68                  | 7.27           | 47                  | 6.49            | 37                  | 9.54         | 58                  | 4.75        | 72                  | 10.37                          |
| DYY (Dayuan Decoction) [856]                       | 82                  | 11.90          | 54                  | 8.62            | 38                  | 8.61         | 68                  | 7.10        | 81                  | 12.77                          |

|                                      |     |       |    |       |    |       |    |      |     |       |
|--------------------------------------|-----|-------|----|-------|----|-------|----|------|-----|-------|
| MXYG (Maxingyiigan Decoction) [1010] | 91  | 11.54 | 62 | 9.59  | 41 | 7.80  | 77 | 7.31 | 88  | 11.44 |
| YQS (Yinqiao Powder) [1017]          | 92  | 11.84 | 66 | 11.92 | 46 | 11.41 | 78 | 7.57 | 92  | 13.42 |
| MXSG (Maxingshigan Decoction) [1021] | 91  | 11.19 | 63 | 9.92  | 41 | 7.61  | 78 | 7.48 | 88  | 11.10 |
| JHQG (Jinhuaqinggan Granule) [1120]  | 103 | 14.45 | 68 | 10.57 | 48 | 10.84 | 86 | 8.67 | 100 | 14.55 |
| HSBD (Huashibaidu Decoction) [1131]  | 97  | 10.94 | 67 | 9.73  | 44 | 7.77  | 82 | 6.74 | 98  | 13.06 |
| LHQW (Lianhuaqingwen Capsule) [1154] | 102 | 12.80 | 71 | 11.60 | 49 | 10.94 | 84 | 7.06 | 99  | 12.89 |
| QFPD (Qingfeipaidu Decoction) [1202] | 102 | 11.39 | 73 | 11.69 | 47 | 8.62  | 92 | 9.44 | 103 | 13.61 |

(Continued)

| Recipes                                            | No. of intersection | Lymphopenia (318) | No. of intersection | cytokine storm (23) | No. of intersection | oxygen saturation (41) | No. of intersection | Diarrhea (76) | No. of intersection | Dyspnea/Difficult Breathing (52) |
|----------------------------------------------------|---------------------|-------------------|---------------------|---------------------|---------------------|------------------------|---------------------|---------------|---------------------|----------------------------------|
| SMI (Shengmai Injection) [363]                     | 68                  | 10.37             | 8                   | 3.83                | 13                  | 5.03                   | 20                  | 5.21          | 17                  | 6.77                             |
| LSY (Preventive prescription by Liu Shangyi) [382] | 116                 | 50.46             | 13                  | 11.44               | 20                  | 13.93                  | 29                  | 13.47         | 25                  | 16.88                            |
| RDNI (Reduning Injection) [447]                    | 124                 | 46.32             | 16                  | 15.23               | 21                  | 12.59                  | 32                  | 13.60         | 26                  | 14.86                            |
| SFT (Shenfu Injection) [447]                       | 95                  | 20.14             | 13                  | 9.32                | 14                  | 4.29                   | 23                  | 5.22          | 17                  | 4.68                             |
| SJZT (Sijunzi Decoction) [498]                     | 111                 | 26.60             | 14                  | 9.64                | 18                  | 7.13                   | 27                  | 6.86          | 20                  | 6.13                             |
| XBCQT (Xuanbai Chengqi                             | 109                 | 24.08             | 10                  | 4.01                | 21                  | 10.45                  | 26                  | 5.88          | 24                  | 9.90                             |



|                                      |     |       |    |       |    |       |    |       |    |       |
|--------------------------------------|-----|-------|----|-------|----|-------|----|-------|----|-------|
| Decoction) [507]                     |     |       |    |       |    |       |    |       |    |       |
| ECT (Erchen Decoction) [551]         | 122 | 29.18 | 14 | 8.39  | 22 | 10.40 | 32 | 9.42  | 25 | 9.65  |
| XBJI (Xuebijing Injection) [624]     | 133 | 29.69 | 14 | 7.01  | 22 | 8.52  | 35 | 9.74  | 28 | 10.75 |
| HXZQ (Huoxiang Zhengqi Powder) [728] | 151 | 32.54 | 19 | 12.32 | 26 | 10.55 | 39 | 10.09 | 33 | 13.24 |
| YPFS (Yupingfeng Powder) [780]       | 118 | 10.23 | 11 | 2.41  | 23 | 6.55  | 31 | 3.87  | 28 | 7.18  |
| DYY (Dayuan Decoction) [856]         | 137 | 14.74 | 15 | 5.14  | 23 | 5.47  | 33 | 3.82  | 28 | 5.94  |
| MXYG (Maxingyiigan Decoction) [1010] | 156 | 15.71 | 17 | 5.59  | 27 | 6.60  | 38 | 4.21  | 32 | 6.54  |
| YQS (Yinqiao Powder) [1017]          | 161 | 17.67 | 17 | 5.53  | 28 | 7.33  | 42 | 6.17  | 33 | 7.16  |
| MXSG (Maxingshigan Decoction) [1021] | 157 | 15.63 | 17 | 5.49  | 27 | 6.46  | 39 | 4.55  | 32 | 6.39  |
| JHQG (Jinhuaqinggan Granule) [1120]  | 177 | 20.10 | 18 | 5.56  | 30 | 7.61  | 44 | 5.75  | 35 | 7.14  |
| HSBD (Huashibaidu Decoction) [1131]  | 173 | 17.65 | 17 | 4.57  | 27 | 5.21  | 42 | 4.61  | 34 | 6.30  |
| LHQW (Lianhuaqingwen Capsule) [1154] | 180 | 19.83 | 18 | 5.28  | 30 | 7.18  | 44 | 5.29  | 36 | 7.39  |
| QFPD (Qingfeipaidu Decoction) [1202] | 187 | 20.83 | 18 | 4.90  | 30 | 6.61  | 47 | 6.21  | 36 | 6.76  |

(Continued)

| Recipes | No. of intersection | Mucus/<br>phlegm/ | No. of intersection | SARS<br>(38) | No. of intersection | coughing<br>(32) | No. of intersection | Nausea/<br>vomiting |
|---------|---------------------|-------------------|---------------------|--------------|---------------------|------------------|---------------------|---------------------|
|---------|---------------------|-------------------|---------------------|--------------|---------------------|------------------|---------------------|---------------------|

|                                                    | suptum (124) |       |    |       |    |      | (58) |      |
|----------------------------------------------------|--------------|-------|----|-------|----|------|------|------|
| SMI (Shengmai Injection) [363]                     | 28           | 5.04  | 10 | 2.83  | 12 | 6.20 | 16   | 4.68 |
| LSY (Preventive prescription by Liu Shangyi) [382] | 44           | 17.26 | 18 | 12.34 | 12 | 5.74 | 18   | 5.95 |
| RDNI (Reduning Injection) [447]                    | 49           | 18.36 | 19 | 11.03 | 15 | 7.98 | 20   | 6.03 |
| SFT (Shenfu Injection) [447]                       | 34           | 5.93  | 15 | 5.97  | 13 | 5.51 | 19   | 5.19 |
| SJZT (Sijunzi Decoction) [498]                     | 46           | 12.47 | 18 | 8.15  | 11 | 2.88 | 22   | 6.50 |
| XBCQT (Xuanbai Chengqi Decoction) [507]            | 39           | 7.04  | 16 | 5.76  | 14 | 5.47 | 20   | 4.72 |
| ECT (Erchen Decoction) [551]                       | 48           | 11.61 | 18 | 6.92  | 12 | 3.06 | 24   | 6.95 |
| XBJI (Xuebijing Injection) [624]                   | 52           | 11.57 | 19 | 6.52  | 14 | 3.79 | 24   | 5.43 |
| HXZQ (Huoxiang Zhengqi Powder) [728]               | 65           | 17.32 | 22 | 7.59  | 17 | 5.05 | 29   | 7.22 |
| YPFS (Yupingfeng Powder) [780]                     | 51           | 6.26  | 18 | 3.59  | 14 | 2.37 | 25   | 3.75 |
| DYY (Dayuan Decoction) [856]                       | 57           | 7.52  | 21 | 4.87  | 17 | 3.68 | 24   | 2.48 |
| MXYG (Maxingyiigan Decoction) [1010]               | 62           | 6.62  | 22 | 3.99  | 23 | 6.94 | 30   | 3.80 |
| YQS (Yinqiao Powder) [1017]                        | 67           | 8.96  | 21 | 3.32  | 19 | 3.69 | 30   | 3.73 |
| MXSG (Maxingshigan Decoction) [1021]               | 63           | 6.86  | 22 | 3.89  | 24 | 7.75 | 30   | 3.69 |
| JHQG (Jinhuaqinggan Granule) [1120]                | 68           | 7.24  | 24 | 4.29  | 24 | 6.57 | 32   | 3.69 |
| HSBD (Huashibaidu Decoction) [1131]                | 69           | 7.49  | 23 | 3.58  | 25 | 7.34 | 32   | 3.59 |
| LHQW (Lianhuaqingwen Capsule) [1154]               | 72           | 8.49  | 25 | 4.64  | 24 | 6.21 | 32   | 3.38 |
| QFPD (Qingfeipaidu Decoction) [1202]               | 76           | 9.51  | 24 | 3.62  | 26 | 7.46 | 35   | 4.39 |

18 representative recipes were referred to this coherence research, including SMI, LSY, RDNI, SFT, SJZT, XBCQT, ECT, XBJI, HXZQ, YPFS, DYY, MXYG, YQS, MXSG, JHQG, HSBD, LHQW and QFPD, which were sorted in order according to the merged target amounts (the actual number sit in the “[ ]”, e.g., QFPD (Qingfeipaidu Decoction) [1202], etc. 14 SSMs across the COVID-19 phases were listed in the first row, the same attached with target amounts in the “( )”, e.g., Mucus/phlegm/suptum ( 124 ) , etc. Different keywords for the same SSM were divided by “/”. The intersection of SSMs and remedies was presented the details in No. of intersection. The significant level of coherence (SLC) was the indicator to the effect on remedies to SSMs, attached here with

two decimal points.

**TableS 15. The clinical trials of TCM remedies for combating COVID-19 registered in ChiCTR (Chinese Clinical Trial Registry).**

| NO. | Registration ID  | Record Date | Title                                                                                                                                                       | Specific TCM Remedies                 | Sample Size |
|-----|------------------|-------------|-------------------------------------------------------------------------------------------------------------------------------------------------------------|---------------------------------------|-------------|
| 1   | ChiCTR2000029381 | 2020/1/27   | A prospective comparative study for Xue-Bi-Jing injection in the treatment of novel coronavirus pneumonia (COVID-19)                                        | XBJI (Xuebijing injection)            | No record   |
| 2   | ChiCTR2000029400 | 2020/1/29   | Clinical Controlled Trial for Traditional Chinese Medicine in the treatment of Novel Coronavirus Pneumonia (COVID-19)                                       | /                                     | 60          |
| 3   | ChiCTR2000029418 | 2020/1/30   | Chinese Herbal medicine for Severe novel coronavirus pneumonia (COVID-19): a Randomized Controlled Trial                                                    | /                                     | 42          |
| 4   | ChiCTR2000029432 | 2020/2/1    | A Real World Study for the Efficacy and Safety of Large Dose Tanreqing Injection in the Treatment of Patients with Novel Coronavirus Pneumonia (COVID-19)   | Tanreqing Injection                   | 72          |
| 5   | ChiCTR2000029433 | 2020/2/1    | A randomized, open-label, blank-controlled trial for Lian-Hua Qing-Wen Capsule/Granule in the treatment of suspected novel coronavirus pneumonia (COVID-19) | LHQW (Lianhuaqingwen capsule/granule) | 240         |

|    |                  |          |                                                                                                                                                                                                                           |                                       |       |
|----|------------------|----------|---------------------------------------------------------------------------------------------------------------------------------------------------------------------------------------------------------------------------|---------------------------------------|-------|
| 6  | ChiCTR2000029434 | 2020/2/1 | A randomized, open-label, blank-controlled trial for Lian-Hua Qing-Wen Capsule/Granule in the treatment of novel coronavirus pneumonia (COVID-19)                                                                         | LHQW (Lianhuaqingwen capsule/granule) | 240   |
| 7  | ChiCTR2000029435 | 2020/2/1 | Randomized controlled trial for traditional Chinese medicine in the prevention of novel coronavirus pneumonia (COVID-19) in high risk population                                                                          | /                                     | 160   |
| 8  | ChiCTR2000029479 | 2020/2/2 | Research for Traditional Chinese Medicine Technology Prevention and Control of 2019-nCoV Pneumonia (Novel Coronavirus Pneumonia, NCP) in the Community Population                                                         | /                                     | 20000 |
| 9  | ChiCTR2000029487 | 2020/2/2 | Clinical Study for Gu-Biao Jie-Du-Ling in Preventing of 2019-nCoV Pneumonia (Novel Coronavirus Pneumonia, NCP) in Children                                                                                                | Gu-Biao Jie-Du-Ling                   | 200   |
| 10 | ChiCTR2000029493 | 2020/2/2 | Traditional Chinese Medicine for Pulmonary Fibrosis, Pulmonary Function and Quality of Life in Patients With 2019-nCoV Pneumonia (Novel Coronavirus Pneumonia, NCP) in Convalescent Period: a Randomized Controlled Trial | /                                     | 100   |
| 11 | ChiCTR2000029589 | 2020/2/5 | An open, prospective, multicenter clinical study for the efficacy and safety of Reduning injection in the treatment of 2019-nCoV pneumonia (novel coronavirus pneumonia,                                                  | RDNI (Reduning injection)             | 60    |

NCP)

|    |                  |          |                                                                                                                                                                                          |                                 |           |
|----|------------------|----------|------------------------------------------------------------------------------------------------------------------------------------------------------------------------------------------|---------------------------------|-----------|
| 12 | ChiCTR2000029601 | 2020/2/6 | Community based prevention and control for Chinese medicine in the treatment of 2019-nCoV pneumonia (novel coronavirus pneumonia, NCP) in the isolate suspected and confirmed population | /                               | 400       |
| 13 | ChiCTR2000029605 | 2020/2/7 | A randomized, open-label, blank-controlled, multicenter trial for Shuang-Huang-Lian oral solution in the treatment of 2019-nCoV pneumonia (novel coronavirus pneumonia, NCP)             | Shuang-Huang-Lian oral solution | No record |
| 14 | ChiCTR2000029624 | 2020/2/7 | A real world study for traditional Chinese Medicine in the treatment of 2019-nCoV pneumonia (novel coronavirus pneumonia, NCP)                                                           | /                               | 500       |
| 15 | ChiCTR2000029628 | 2020/2/7 | A clinical observational study for Xin-Guan-2 formula in the treatment of suspected 2019-nCoV pneumonia (novel coronavirus pneumonia, NCP)                                               | Xin-Guan-2 formula              | 100       |
| 16 | ChiCTR2000029637 | 2020/2/8 | An observational study for Xin-Guan-1 formula in the treatment of 2019-nCoV pneumonia (novel coronavirus pneumonia, NCP)                                                                 | Xin-Guan-1 formula              | 100       |

|    |                  |           |                                                                                                                                                                              |                            |     |
|----|------------------|-----------|------------------------------------------------------------------------------------------------------------------------------------------------------------------------------|----------------------------|-----|
| 17 | ChiCTR2000029747 | 2020/2/11 | Effect evaluation and prognosis of Chinese medicine based on Novel Coronavirus Pneumonia (COVID-19)                                                                          | /                          | 200 |
| 18 | ChiCTR2000029755 | 2020/2/12 | A randomized, open, parallel-controlled trial for the efficacy and safety of Jingyebaidu granules in treating novel coronavirus pneumonia (COVID-19)                         | Jingyebaidu granules       | 120 |
| 19 | ChiCTR2000029756 | 2020/2/12 | Clinical study of nebulized Xiyanping injection in the treatment of novel coronavirus pneumonia (COVID-19)                                                                   | Xiyanping injection        | 238 |
| 20 | ChiCTR2000029763 | 2020/2/12 | The efficacy of traditional chinese medicine on Novel Coronavirus Pneumonia (COVID-19) patients treated in square cabin hospital: a prospective, randomized controlled trial | /                          | 408 |
| 21 | ChiCTR2000029769 | 2020/2/13 | Babaodan Capsule used for the adjuvant treatment of Severe novel coronavirus pneumonia (COVID-19)                                                                            | Babaodan Capsule           | 40  |
| 22 | ChiCTR2000029780 | 2020/2/13 | A multicenter, randomized, open, controlled trial for the efficacy and safety of Shen-Qi Fu-Zheng injection in the treatment of novel coronavirus pneumonia (COVID-19)       | Shen-Qi Fu-Zheng injection | 160 |
| 23 | ChiCTR2000029813 | 2020/2/14 | Clinical Trial for Tanreqing Capsules in the Treatment of Novel Coronavirus Pneumonia (COVID-19)                                                                             | /                          | 72  |
| 24 | ChiCTR2000029819 | 2020/2/14 | Ba-Bao-Dan in the adjuvant therapy of novel coronavirus pneumonia (COVID-19) patients                                                                                        | Ba-Bao-Dan                 | 80  |

|    |                  |           |                                                                                                                                                                       |                         |     |
|----|------------------|-----------|-----------------------------------------------------------------------------------------------------------------------------------------------------------------------|-------------------------|-----|
| 25 | ChiCTR2000029822 | 2020/2/14 | A randomized controlled trial for honeysuckle decoction in the treatment of patients with novel coronavirus (COVID-19) infection                                      | Honeysuckle decoction   | 110 |
| 26 | ChiCTR2000029855 | 2020/2/15 | A randomized, open and controlled clinical trial for traditional Chinese medicine in the treatment of novel coronavirus pneumonia (COVID-19)                          | /                       | 180 |
| 27 | ChiCTR2000029896 | 2020/2/16 | Evaluate the effectiveness of Traditional Chinese medicine in the treatment of novel coronavirus pneumonia (COVID-19)                                                 | /                       | 100 |
| 28 | ChiCTR2000029941 | 2020/2/17 | A randomized controlled trial for Traditional Chinese Medicine in the treatment for Novel Coronavirus Pneumonia (COVID-19)                                            | /                       | 200 |
| 29 | ChiCTR2000029947 | 2020/2/17 | A Randomized Controlled Trial for Qingyi No. 4 Compound in the treatment of Convalescence Patients of Novel Coronavirus Pneumonia (COVID-19)                          | Qingyi No. 4            | 200 |
| 30 | ChiCTR2000029954 | 2020/2/17 | Efficacy and safety of honeysuckle oral liquid in the treatment of novel coronavirus pneumonia (COVID-19): a multicenter, randomized, controlled, open clinical trial | Honeysuckle oral liquid | 300 |
| 31 | ChiCTR2000029956 | 2020/2/17 | Chinese Medicine Promotes Rehabilitation Recommendations after 2019 Novel Coronavirus Infection (COVID-19)                                                            | /                       | 120 |

|    |                  |           |                                                                                                                                                                                                                               |                                                            |     |
|----|------------------|-----------|-------------------------------------------------------------------------------------------------------------------------------------------------------------------------------------------------------------------------------|------------------------------------------------------------|-----|
| 32 | ChiCTR2000029976 | 2020/2/18 | The effect of Gymnastic Qigong Yangfeifang on functional recovery and quality of life in patients with mild novel coronavirus pneumonia (COVID-19)                                                                            | Gymnastic Qigong Yangfeifang                               | 160 |
| 33 | ChiCTR2000029991 | 2020/2/18 | A randomized, open-label, controlled trial for the safety and efficiency of Kesuting syrup and Keqing capsule in the treatment of mild and moderate novel coronavirus pneumonia (COVID-19)                                    | Kesuting syrup and Keqing capsule                          | 72  |
| 34 | ChiCTR2000030022 | 2020/2/20 | A parallel, randomized controlled clinical trial for the efficacy and safety of Pediatric Huatanzhike granules (containing ipecacuanha tincture) in the treatment of mild and moderate novel coronavirus pneumonia (COVID-19) | Pediatric Huatanzhike granules                             | 100 |
| 35 | ChiCTR2000030033 | 2020/2/21 | A study for the intervention of Xiangxue antiviral oral solution and Wu-Zhi-Fang-Guan-Fang on close contacts of novel coronavirus pneumonia (COVID-19)                                                                        | Xiangxue antiviral oral solution and Wu-Zhi-Fang-Guan-Fang | 828 |
| 36 | ChiCTR2000030034 | 2020/2/21 | Traditional Chinese Medicine in the treatment of novel coronavirus pneumonia (COVID-19): a multicentre, randomized controlled trial                                                                                           |                                                            | 132 |
| 37 | ChiCTR2000030043 | 2020/2/21 | Shen-Fu injection in the treatment of severe novel coronavirus pneumonia (COVID-19): a multicenter, randomized, open-label, controlled trial                                                                                  | SFT (Shen-Fu injection)                                    | 300 |



|    |                  |           |                                                                                                                                                                                                             |                                                     |     |
|----|------------------|-----------|-------------------------------------------------------------------------------------------------------------------------------------------------------------------------------------------------------------|-----------------------------------------------------|-----|
| 38 | ChiCTR2000030117 | 2020/2/23 | A multicenter, randomized, open, parallel controlled trial for the evaluation of the effectiveness and safety of Xiyanping injection in the treatment of common type novel coronavirus pneumonia (COVID-19) | Xiyanping injection                                 | 348 |
| 39 | ChiCTR2000030166 | 2020/2/24 | Randomized, parallel control, open trial for Qing-Wen Bai-Du-Yin combined with antiviral therapy in the treatment of novel coronavirus pneumonia (COVID-19)                                                 | Qing-Wen Bai-Du-Yin                                 | 20  |
| 40 | ChiCTR2000030188 | 2020/2/24 | Clinical Study on Syndrome Differentiation of TCM in Treating Severe and Critical novel coronavirus pneumonia (COVID-19)                                                                                    | /                                                   | 120 |
| 41 | ChiCTR2000030215 | 2020/2/25 | Study for the efficacy of Kangguan No. 1-3 prescription in the treatment of novel coronavirus pneumonia (COVID19)                                                                                           | Kangguan No. 1-3                                    | 120 |
| 42 | ChiCTR2000030288 | 2020/2/27 | Efficacy of Traditional Chinese Medicine in the Treatment of Novel Coronavirus Pneumonia (COVID-19): a Randomized Controlled Trial                                                                          | /                                                   | 204 |
| 43 | ChiCTR2000030314 | 2020/2/28 | Traditional Chinese medicine Ma-Xing-Shi-Gan-Tang and Sheng-Jiang-San in the treatment of children with novel coronavirus pneumonia (COVID-19)                                                              | MXSG (Maxingshigan decoction) and Shengjiang powder | 40  |
| 44 | ChiCTR2000030388 | 2020/3/1  | Efficacy and safety of Xue-Bi-Jing injection in the treatment of severe cases of novel coronavirus pneumonia (COVID-19)                                                                                     | XBJI (Xuebijing injection)                          | 60  |

|    |                  |           |                                                                                                                                                                       |                                    |     |
|----|------------------|-----------|-----------------------------------------------------------------------------------------------------------------------------------------------------------------------|------------------------------------|-----|
| 45 | ChiCTR2000030469 | 2020/3/2  | A randomized parallel controlled trial for LIUSHENWAN in Treatment of Novel Coronavirus Pneumonia (COVID-19)                                                          | Liu-Shen-Wan                       | 96  |
| 46 | ChiCTR2000030479 | 2020/3/3  | Study for the Effectiveness and Safety of Yi-Qi Hua-shi Jie-Du-Fang in the Treatment of the Novel Coronavirus Pneumonia (COVID-19)                                    | Yi-Qi Hua-shi Jie-Du-Fang          | 100 |
| 47 | ChiCTR2000030518 | 2020/3/5  | Zedoary Turmeric Oil for Injection in the treatment of Novel Coronavirus Pneumonia (COVID-19): a randomized, open, controlled trial                                   | Zedoary Turmeric Oil for Injection | 60  |
| 48 | ChiCTR2000030522 | 2020/3/5  | Efficacy and safety of Ma-Xing-Gan-Shi decoction in the treatment of novel coronavirus pneumonia (COVID-19)                                                           | MXSG (Maxingshigan decoction       | 100 |
| 49 | ChiCTR2000030545 | 2020/3/6  | Efficacy and safety of honeysuckle oral liquid in the treatment of novel coronavirus pneumonia (COVID-19): a multicenter, randomized, controlled, open clinical trial | Honeysuckle oral liquid            | 300 |
| 50 | ChiCTR2000030704 | 2020/3/10 | Observation Of Clinical Efficacy And Safety of Bufonis Venenum Injection In The Treatment Of Severe Novel Coronavirus Pneumonia (COVID-19)                            | Bufonis Venenum Injection          | 50  |
| 51 | ChiCTR2000030751 | 2020/3/13 | Clinical Research for Traditional Mongolian Medicine in the treatment of novel coronavirus / pneumonia (COVID-19)                                                     |                                    | 60  |

|    |                  |           |                                                                                                                                                                                                                  |                                                                       |      |
|----|------------------|-----------|------------------------------------------------------------------------------------------------------------------------------------------------------------------------------------------------------------------|-----------------------------------------------------------------------|------|
| 52 | ChiCTR2000030759 | 2020/3/13 | Study for the therapeutic effect and mechanism of traditional Chinese medicine in the treatment of novel coronavirus pneumonia (COVID-19)                                                                        | /                                                                     | 70   |
| 53 | ChiCTR2000030804 | 2020/3/15 | Exocarpium Citri Grandis Relieves Symptoms of Novel Coronavirus Pneumonia (COVID-19): a Randomized Controlled Clinical Trial                                                                                     | Exocarpium citri grandis                                              | 128  |
| 54 | ChiCTR2000030864 | 2020/3/16 | Traditional Chinese Medicine for novel coronavirus pneumonia (COVID-19)                                                                                                                                          | /                                                                     | 50   |
| 55 | ChiCTR2000030898 | 2020/3/16 | Evaluation on the effect of Chushifangyi prescription in preventing novel coronavirus pneumonia (COVID-19)                                                                                                       | Chushifangyi prescription                                             | 1000 |
| 56 | ChiCTR2000030920 | 2020/3/17 | Evaluation of the effect of taking tricholoma matsutake, cannabis sativa capsule and dendrobium candidum to nutrition intervention of patients with novel coronavirus pneumonia (COVID-19) during convalescence. | tricholoma matsutake, cannabis sativa capsule and dendrobium candidum | 100  |
| 57 | ChiCTR2000030936 | 2020/3/18 | A real-world study for the Chinese medicines "Xinguan 2" and "Xinguan 3" in the treatment of novel coronavirus pneumonia (COVID-19)                                                                              | Xin-Guan-2 formula, Xin-Guan-3 formula                                | 2840 |
| 58 | ChiCTR2000030937 | 2020/3/18 | A randomized, open-label, controlled trial for Gu-Shen Ding-Chuan-Wan in the treatment of patients with novel coronavirus pneumonia (COVID-19) at recovery phase with Fei-Pi-Qi-Xu Zhen                          | Gu-Shen Ding-Chuan-Wan                                                | 144  |

|    |                  |           |                                                                                                                                                                                                                  |                             |      |
|----|------------------|-----------|------------------------------------------------------------------------------------------------------------------------------------------------------------------------------------------------------------------|-----------------------------|------|
| 59 | ChiCTR2000030988 | 2020/3/20 | A randomized controlled trial for Hua-Shi Bai-Du granules in patients with novel coronavirus pneumonia (COVID-19)                                                                                                | HSBD (Huashibaidu granules) | 204  |
| 60 | ChiCTR2000031089 | 2020/3/22 | A medical records based study for Tou-Jie-Qu-Wen Granules in the Treatment of mild and moderate patients with novel coronavirus pneumonia (COVID-19)                                                             | Tou-Jie-Qu-Wen Granules     | 300  |
| 61 | ChiCTR2000031672 | 2020/4/5  | Development and application of TCM body regulating protection scheme for the convalescent population of novel coronavirus pneumonia (COVID-19)                                                                   | /                           | 150  |
| 62 | ChiCTR2000031888 | 2020/4/13 | A medical records based study for "Guangdong Pneumonia NO.1" in the Treatment of Novel Coronavirus Pneumonia (COVID-19)                                                                                          | Guangdong Pneumonia NO.1    | 300  |
| 63 | ChiCTR2000031955 | 2020/4/15 | Study for prevention of novel coronavirus pneumonia (COVID-19) in high risk population by Chinese medicine                                                                                                       | /                           | 3808 |
| 64 | ChiCTR2000031982 | 2020/4/16 | Clinical observation for the effect of Ke-Gan-Li-Yan oral liquid on the relief of laryngeal symptoms of novel coronavirus pneumonia (COVID-19) convalescence and suspected patients and other susceptible people | Ke-Gan-Li-Yan oral liquid   | 240  |
| 65 | ChiCTR2000032098 | 2020/4/19 | Danggui Shaoyao Powder in the synergistic treatment of novel coronavirus pneumonia (COVID-19)                                                                                                                    | Danggui Shaoyao Powder      | 300  |

|    |                  |           |                                                                                                                                                                                                             |                             |     |
|----|------------------|-----------|-------------------------------------------------------------------------------------------------------------------------------------------------------------------------------------------------------------|-----------------------------|-----|
| 66 | ChiCTR2000032165 | 2020/4/21 | A multicenter, randomized, double-blind, parallel-controlled trial for Qi-Mai-Fei-Luo-Ping Mixture in the improvement of lung function of novel coronavirus pneumonia (COVID-19) in the convalescent period | Qi-Mai-Fei-Luo-Ping Mixture | 60  |
| 67 | ChiCTR2000032205 | 2020/4/23 | A multicenter randomized, double-blind, placebo-controlled trial for Sheng-Mai-Yin for improvement of the pulmonary heart function related symptoms of convalescence patients of new coronavirus pneumonia  | SMI (Sheng-Mai-Yin)         | 200 |
| 68 | ChiCTR2000032237 | 2020/4/23 | A multicenter, randomized, double-blind, placebo-controlled trial for Xiang-Sha-Liu-Jun Pill in the treatment of novel coronavirus pneumonia (COVID-19) decline in digestive function during convalescence  | Xiang-Sha-Liu-Jun Pill      | 200 |
| 69 | ChiCTR2000032313 | 2020/4/25 | Study for efficacy and safety of Jie-Xing-Jun-Zi granules in the Treatment of convalescent patients of novel coronavirus pneumonia (COVID-19)                                                               | Jie-Xing-Jun-Zi granules    | 60  |
| 70 | ChiCTR2000032399 | 2020/4/27 | A multicenter, randomized, double-blind, placebo-controlled trial for Xiaoyao capsule in the improvement of sleep mood disorder of convalescence patients of novel coronavirus pneumonia (COVID-19)         | Xiaoyao capsule             | 200 |

|    |                  |           |                                                                                                                                                                                                                 |                               |      |
|----|------------------|-----------|-----------------------------------------------------------------------------------------------------------------------------------------------------------------------------------------------------------------|-------------------------------|------|
| 71 | ChiCTR2000032412 | 2020/4/27 | A medical record based retrospective study for the effectiveness and safety of Xi-Yan-Ping injection combined with conventional protocol in the treatment of common type novel coronavirus pneumonia (COVID-19) | Xiyanping injection           | 426  |
| 72 | ChiCTR2000032461 | 2020/4/29 | A medical record based retrospective study for effect of applying individualized Chinese herbal medicine in treatment of patients with novel coronavirus pneumonia (COVID-19)                                   | /                             | 500  |
| 73 | ChiCTR2000032480 | 2020/4/29 | Study on data management and diagnosis-treatment mode of TCM intervention for novel coronavirus pneumonia (COVID-19) convalescence                                                                              | /                             | 1000 |
| 74 | ChiCTR2000032573 | 2020/5/3  | A randomized, double-blind, controlled trial for Bu-Fei-Huo-Xue Capsule in the treatment of novel coronavirus pneumonia (COVID-19) convalescence patient with "Fei-Pi-Qi-Xu zhen"                               | Bu-Fei-Huo-Xue Capsule        | 120  |
| 75 | ChiCTR2000032635 | 2020/5/4  | Study for Screening of Chinese Patent Drugs in the Rehabilitation Treatment of novel coronavirus pneumonia (COVID-19)                                                                                           | /                             | 60   |
| 76 | ChiCTR2000032767 | 2020/5/9  | A Medical Records Based Study for Clinical Efficacy and Safety of "clear lung detoxification soup" in the treatment of Novel Coronavirus Pneumonia (COVID-19)                                                   | QFPD (Qingfeipaidu decoction) | 782  |

---

76 clinical trials with TCM remedies or TCM patents were selected here from 605 registered trials nationwide (the Supplementary Table 13 showed the full lists). Registration ID, record date, research title, TCM remedies, sample size, study design and current phase were included in this table. TCM remedies were named according to their titles, except for some discussed in Fig 5, e.g., QFPD (Qingfeipaidu decoction), etc.

**TableS 16. The all list of clinical trials for COVID-19 registered in ChiCTR (Chinese Clinical Trial Registry).**

| NO. | Registration ID  | Record Date | Research Institutions                                                     | Trials Title                                                                                                                                                |
|-----|------------------|-------------|---------------------------------------------------------------------------|-------------------------------------------------------------------------------------------------------------------------------------------------------------|
| 1   | ChiCTR2000029381 | 2020/1/27   | The First Affiliated Hospital of Guangzhou Medical University             | A prospective comparative study for Xue-Bi-Jing injection in the treatment of novel coronavirus pneumonia (COVID-19)                                        |
| 2   | ChiCTR2000029400 | 2020/1/29   | China Academy of Chinese Medical Sciences                                 | Clinical Controlled Trial for Traditional Chinese Medicine in the treatment of Novel Coronavirus Pneumonia (COVID-19)                                       |
| 3   | ChiCTR2000029418 | 2020/1/30   | Dongzhimen Hospital Affiliated to Beijing University of Chinese Medicine  | Chinese Herbal medicine for Severe novel coronavirus pneumonia (COVID-19): a Randomized Controlled Trial                                                    |
| 4   | ChiCTR2000029432 | 2020/2/1    | The First Affiliated Hospital of Guangzhou University of Chinese Medicine | A Real World Study for the Efficacy and Safety of Large Dose Tanreqing Injection in the Treatment of Patients with Novel Coronavirus Pneumonia (COVID-19)   |
| 5   | ChiCTR2000029433 | 2020/2/1    | Hebei Yiling Hospital, Renmin Hospital of Wuhan University                | A randomized, open-label, blank-controlled trial for Lian-Hua Qing-Wen Capsule/Granule in the treatment of suspected novel coronavirus pneumonia (COVID-19) |
| 6   | ChiCTR2000029434 | 2020/2/1    | Hebei Yiling Hospital, Renmin Hospital of Wuhan University                | A randomized, open-label, blank-controlled trial for Lian-Hua Qing-Wen Capsule/Granule in the treatment of novel coronavirus pneumonia (COVID-19)           |
| 7   | ChiCTR2000029435 | 2020/2/1    | Wuhan 1st Hospital                                                        | Randomized controlled trial for traditional Chinese medicine in the prevention of novel coronavirus pneumonia (COVID-19) in high risk population            |

|    |                          |                                                                                                                                              |                                                                                                                                                                                                                           |
|----|--------------------------|----------------------------------------------------------------------------------------------------------------------------------------------|---------------------------------------------------------------------------------------------------------------------------------------------------------------------------------------------------------------------------|
| 8  | ChiCTR20000294792020/2/2 | Hospital of Chengdu University of Traditional Chinese Medicine                                                                               | Research for Traditional Chinese Medicine Technology Prevention and Control of 2019-nCoV Pneumonia (Novel Coronavirus Pneumonia, NCP) in the Community Population                                                         |
| 9  | ChiCTR20000294872020/2/2 | Wuhan Hospital of Integrated Traditional Chinese and Western Medicine                                                                        | Clinical Study for Gu-Biao Jie-Du-Ling in Preventing of 2019-nCoV Pneumonia (Novel Coronavirus Pneumonia, NCP) in Children                                                                                                |
| 10 | ChiCTR20000294932020/2/2 | 1. Xinhua affiliated hospital, Hubei University of Chinese Medicine; 2. Hubei Provincial Hospital of Integrated Chinese and Western Medicine | Traditional Chinese Medicine for Pulmonary Fibrosis, Pulmonary Function and Quality of Life in Patients With 2019-nCoV Pneumonia (Novel Coronavirus Pneumonia, NCP) in Convalescent Period: a Randomized Controlled Trial |
| 11 | ChiCTR20000295892020/2/5 | Beijing hospital of Traditional Chinese Medicine; Hubei Integrated Traditional Chinese and Western Medicine Hospital                         | An open, prospective, multicenter clinical study for the efficacy and safety of Reduning injection in the treatment of 2019-nCoV pneumonia (novel coronavirus pneumonia, NCP)                                             |
| 12 | ChiCTR20000296012020/2/6 | Hubei Provincial Hospital of TCM                                                                                                             | Community based prevention and control for Chinese medicine in the treatment of 2019-nCoV pneumonia (novel coronavirus pneumonia, NCP) in the isolate suspected and confirmed population                                  |
| 13 | ChiCTR20000296052020/2/7 | Tongji Hospital, Tongji Medical College, Huazhong University of Science and Technology                                                       | A randomized, open-label, blank-controlled, multicenter trial for Shuang-Huang-Lian oral solution in the treatment of 2019-nCoV pneumonia (novel coronavirus pneumonia, NCP)                                              |
| 14 | ChiCTR20000296242020/2/7 | Shanghai Public Health Clinical Center                                                                                                       | A real world study for traditional Chinese Medicine in the treatment of 2019-nCoV pneumonia (novel coronavirus pneumonia, NCP)                                                                                            |
| 15 | ChiCTR20000296282020/2/7 | Guangdong Provincial Hospital of Chinese Medicine                                                                                            | A clinical observational study for Xin-Guan-2 formula in the treatment of suspected 2019-nCoV pneumonia (novel coronavirus pneumonia, NCP)                                                                                |
| 16 | ChiCTR20000296372020/2/8 | Guangdong Provincial Hospital of Chinese Medicine                                                                                            | An observational study for Xin-Guan-1 formula in the treatment of 2019-nCoV pneumonia (novel coronavirus pneumonia, NCP)                                                                                                  |



|    |                           |                                                                                                                                          |                                                                                                                                                                              |
|----|---------------------------|------------------------------------------------------------------------------------------------------------------------------------------|------------------------------------------------------------------------------------------------------------------------------------------------------------------------------|
| 17 | ChiCTR20000297472020/2/11 | The First Affiliated Hospital of Anhui University of Traditional Chinese Medicine<br>Institutional Review Board, Tongji Hospital, Tongji | Effect evaluation and prognosis of Chinese medicine based on Novel Coronavirus Pneumonia (COVID-19)                                                                          |
| 18 | ChiCTR20000297552020/2/12 | Medical College, Huazhong University of Science and Technology                                                                           | A randomized, open, parallel-controlled trial for the efficacy and safety of Jingyebaidu granules in treating novel coronavirus pneumonia (COVID-19)                         |
| 19 | ChiCTR20000297562020/2/12 | Renmin Hospital of Wuhan University                                                                                                      | Clinical study of nebulized Xiyanping injection in the treatment of novel coronavirus pneumonia (COVID-19)                                                                   |
| 20 | ChiCTR20000297632020/2/12 | China Academy of Chinese Medical Sciences                                                                                                | The efficacy of traditional chinese medicine on Novel Coronavirus Pneumonia (COVID-19) patients treated in square cabin hospital: a prospective, randomized controlled trial |
| 21 | ChiCTR20000297692020/2/13 | Taizhou Hospital of Zhejiang Province                                                                                                    | Babaodan Capsule used for the adjuvant treatment of Severe novel coronavirus pneumonia (COVID-19)                                                                            |
| 22 | ChiCTR20000297802020/2/13 | Union Hospital affiliated to Tongji Medical College of Huazhong University of Science and Technology                                     | A multicenter, randomized, open, controlled trial for the efficacy and safety of Shen-Qi Fu-Zheng injection in the treatment of novel coronavirus pneumonia (COVID-19)       |
| 23 | ChiCTR20000298132020/2/14 | Shanghai Public Health Clinical Center                                                                                                   | Clinical Trial for Tanreqing Capsules in the Treatment of Novel Coronavirus Pneumonia (COVID-19)                                                                             |
| 24 | ChiCTR20000298192020/2/14 | Sir Run Run Show Hospital, School of Medicine, Zhejiang University                                                                       | Ba-Bao-Dan in the adjuvant therapy of novel coronavirus pneumonia (COVID-19) patients                                                                                        |
| 25 | ChiCTR20000298222020/2/14 | Nanjing Second Hospital                                                                                                                  | A randomized controlled trial for honeysuckle decoction in the treatment of patients with novel coronavirus (COVID-19) infection                                             |
| 26 | ChiCTR20000298552020/2/15 | The First Affiliated Hospital of Medical College of Zhejiang University                                                                  | A randomized, open and controlled clinical trial for traditional Chinese medicine in the treatment of novel coronavirus pneumonia (COVID-19)                                 |
| 27 | ChiCTR20000298962020/2/16 | Affiliated Hospital of Changchun University of traditional Chinese Medicine                                                              | Evaluate the effectiveness of Traditional Chinese medicine in the treatment of novel coronavirus pneumonia (COVID-19)                                                        |

|    |                  |           |                                                                                    |                                                                                                                                                                                                                               |
|----|------------------|-----------|------------------------------------------------------------------------------------|-------------------------------------------------------------------------------------------------------------------------------------------------------------------------------------------------------------------------------|
| 28 | ChiCTR2000029941 | 2020/2/17 | Longhua Hospital Affiliated to Shanghai University of Traditional Chinese Medicine | A randomized controlled trial for Traditional Chinese Medicine in the treatment for Novel Coronavirus Pneumonia (COVID-19)                                                                                                    |
| 29 | ChiCTR2000029947 | 2020/2/17 | Longhua Hospital Affiliated to Shanghai University of Traditional Chinese Medicine | A Randomized Controlled Trial for Qingyi No. 4 Compound in the treatment of Convalescence Patients of Novel Coronavirus Pneumonia (COVID-19)                                                                                  |
| 30 | ChiCTR2000029954 | 2020/2/17 | Hubei Hospital of Traditional Chinese Medicine                                     | Efficacy and safety of honeysuckle oral liquid in the treatment of novel coronavirus pneumonia (COVID-19): a multicenter, randomized, controlled, open clinical trial                                                         |
| 31 | ChiCTR2000029956 | 2020/2/17 | Hospital of Chengdu University of Traditional Chinese Medicine                     | Chinese Medicine Promotes Rehabilitation Recommendations after 2019 Novel Coronavirus Infection (COVID-19)                                                                                                                    |
| 32 | ChiCTR2000029976 | 2020/2/18 | Shanghai University of Traditional Chinese Medicine                                | The effect of Gymnastic Qigong Yangfeifang on functional recovery and quality of life in patients with mild novel coronavirus pneumonia (COVID-19)                                                                            |
| 33 | ChiCTR2000029991 | 2020/2/18 | The First Affiliated Hospital of Nanchang University                               | A randomized, open-label, controlled trial for the safety and efficiency of Kesuting syrup and Keqing capsule in the treatment of mild and moderate novel coronavirus pneumonia (COVID-19)                                    |
| 34 | ChiCTR2000030022 | 2020/2/20 | First Affiliated Hospital of Anhui Medical University                              | A parallel, randomized controlled clinical trial for the efficacy and safety of Pediatric Huatanzhike granules (containing ipecacuanha tincture) in the treatment of mild and moderate novel coronavirus pneumonia (COVID-19) |
| 35 | ChiCTR2000030033 | 2020/2/21 | The First Affiliated Hospital of Guangzhou Medical University                      | A study for the intervention of Xiangxue antiviral oral solution and Wu-Zhi-Fang-Guan-Fang on close contacts of novel coronavirus pneumonia (COVID-19)                                                                        |
| 36 | ChiCTR2000030034 | 2020/2/21 | Tongde Hospital of Zhejiang Province                                               | Traditional Chinese Medicine in the treatment of novel coronavirus pneumonia (COVID-19): a multicentre, randomized controlled trial                                                                                           |

|    |                           |                                                                                                        |                                                                                                                                                                                                                                                                                                                                                                            |
|----|---------------------------|--------------------------------------------------------------------------------------------------------|----------------------------------------------------------------------------------------------------------------------------------------------------------------------------------------------------------------------------------------------------------------------------------------------------------------------------------------------------------------------------|
| 37 | ChiCTR20000300432020/2/21 | Peking University Third Hospital                                                                       | Shen-Fu injection in the treatment of severe novel coronavirus pneumonia (COVID-19): a multicenter, randomized, open-label, controlled trial                                                                                                                                                                                                                               |
| 38 | ChiCTR20000301172020/2/23 | Jiangxi Qingfeng Pharmaceutical Co., Ltd.                                                              | A multicenter, randomized, open, parallel controlled trial for the evaluation of the effectiveness and safety of Xiyanping injection in the treatment of common type novel coronavirus pneumonia (COVID-19)<br>Randomized, parallel control, open trial for Qing-Wen Bai-Du-Yin combined with antiviral therapy in the treatment of novel coronavirus pneumonia (COVID-19) |
| 39 | ChiCTR20000301662020/2/24 | The 5th Medical Center Chinese PLA General Hospital                                                    | Clinical Study on Syndrome Differentiation of TCM in Treating Severe and Critical novel coronavirus pneumonia (COVID-19)                                                                                                                                                                                                                                                   |
| 40 | ChiCTR20000301882020/2/24 | Guangdong Provincial Hospital of Chinese Medicine - Zhuhai Hospital                                    | Study for the efficacy of Kangguan No. 1-3 prescription in the treatment of novel coronavirus pneumonia (COVID19)                                                                                                                                                                                                                                                          |
| 41 | ChiCTR20000302152020/2/25 | The First Affiliated Hospital of Nanchang University                                                   | Efficacy of Traditional Chinese Medicine in the Treatment of Novel Coronavirus Pneumonia (COVID-19): a Randomized Controlled Trial                                                                                                                                                                                                                                         |
| 42 | ChiCTR20000302882020/2/27 | China Academy of Chinese Medical Sciences                                                              | Traditional Chinese medicine Ma-Xing-Shi-Gan-Tang and Sheng-Jiang-San in the treatment of children with novel coronavirus pneumonia (COVID-19)                                                                                                                                                                                                                             |
| 43 | ChiCTR20000303142020/2/28 | Xiangyang Central Hospital, Affiliated Hospital of Hubei University of Arts and Sciences               | Efficacy and safety of Xue-Bi-Jing injection in the treatment of severe cases of novel coronavirus pneumonia (COVID-19)                                                                                                                                                                                                                                                    |
| 44 | ChiCTR20000303882020/3/1  | Jingzhou First People's Hospital                                                                       | A randomized parallel controlled trial for LIUSHENWAN in Treatment of Novel Coronavirus Pneumonia (COVID-19)                                                                                                                                                                                                                                                               |
| 45 | ChiCTR20000304692020/3/2  | Shuguang Hospital Affiliated to Shanghai University of T.C.M.                                          | Study for the Effectiveness and Safety of Yi-Qi Hua-shi Jie-Du-Fang in the Treatment of the Novel Coronavirus Pneumonia (COVID-19)                                                                                                                                                                                                                                         |
| 46 | ChiCTR20000304792020/3/3  | Affiliated Hospital of traditional Chinese and Western Medicine Nanjing University of Chinese Medicine |                                                                                                                                                                                                                                                                                                                                                                            |

|    |                           |                                                                                    |                                                                                                                                                                                                                  |
|----|---------------------------|------------------------------------------------------------------------------------|------------------------------------------------------------------------------------------------------------------------------------------------------------------------------------------------------------------|
| 47 | ChiCTR20000305182020/3/5  | the Second Affiliated Hospital of Wenzhou Medical University                       | Zedoary Turmeric Oil for Injection in the treatment of Novel Coronavirus Pneumonia (COVID-19): a randomized, open, controlled trial                                                                              |
| 48 | ChiCTR20000305222020/3/5  | Affiliated Hospital of Chengdu University of Traditional Chinese Medicine          | Efficacy and safety of Ma-Xing-Gan-Shi decoction in the treatment of novel coronavirus pneumonia (COVID-19)                                                                                                      |
| 49 | ChiCTR20000305452020/3/6  | Hubei Hospital of Traditional Chinese Medicine                                     | Efficacy and safety of honeysuckle oral liquid in the treatment of novel coronavirus pneumonia (COVID-19): a multicenter, randomized, controlled, open clinical trial                                            |
| 50 | ChiCTR20000307042020/3/10 | Jiangsu Provincial Hospital of Integrated Traditional Chinese and Western Medicine | Observation Of Clinical Efficacy And Safety Of Bufonis Venenum Injection In The Treatment Of Severe Novel Coronavirus Pneumonia (COVID-19)                                                                       |
| 51 | ChiCTR20000307512020/3/13 | Affiliated Hospital of Inner Mongolia University for the Nationalities             | Clinical Research for Traditional Mongolian Medicine in the treatment of novel coronavirus pneumonia (COVID-19)                                                                                                  |
| 52 | ChiCTR20000307592020/3/13 | The First Affiliated Hospital of Wenzhou Medical University                        | Study for the therapeutic effect and mechanism of traditional Chinese medicine in the treatment of novel coronavirus pneumonia (COVID-19)                                                                        |
| 53 | ChiCTR20000308042020/3/15 | Maoming People's Hospital                                                          | Exocarpium Citri Grandis Relieves Symptoms of Novel Coronavirus Pneumonia (COVID-19): a Randomized Controlled Clinical Trial                                                                                     |
| 54 | ChiCTR20000308642020/3/16 | Xiangyang 1st People's Hospital                                                    | Traditional Chinese Medicine for novel coronavirus pneumonia (COVID-19)                                                                                                                                          |
| 55 | ChiCTR20000308982020/3/16 | Affiliated Hospital of Changchun University of Traditional Chinese Medicine        | Evaluation on the effect of Chushifangyi prescription in preventing novel coronavirus pneumonia (COVID-19)                                                                                                       |
| 56 | ChiCTR20000309202020/3/17 | HwaMei Hospital, University of Chinese Academy of Sciences                         | Evaluation of the effect of taking tricholoma matsutake, cannabis sativa capsule and dendrobium candidum to nutrition intervention of patients with novel coronavirus pneumonia (COVID-19) during convalescence. |

|    |                           |                                                                |                                                                                                                                                                                                                  |
|----|---------------------------|----------------------------------------------------------------|------------------------------------------------------------------------------------------------------------------------------------------------------------------------------------------------------------------|
| 57 | ChiCTR20000309362020/3/18 | Hospital of Chengdu University of Traditional Chinese Medicine | A real-world study for the Chinese medicines "Xinguan 2" and "Xinguan 3" in the treatment of novel coronavirus pneumonia (COVID-19)                                                                              |
| 58 | ChiCTR20000309372020/3/18 | the First Affiliated Hospital of Guangzhou Medical University  | A randomized, open-label, controlled trial for Gu-Shen Ding-Chuan-Wan in the treatment of patients with novel coronavirus pneumonia (COVID-19) at recovery phase with Fei-Pi-Qi-Xu Zhen                          |
| 59 | ChiCTR20000309882020/3/20 | Guangdong Provincial Hospital of Chinese Medicine              | A randomized controlled trial for Hua-Shi Bai-Du granules in patients with novel coronavirus pneumonia (COVID-19)                                                                                                |
| 60 | ChiCTR20000310892020/3/22 | Guangzhou Eighth People's Hospital                             | A medical records based study for Tou-Jie-Qu-Wen Granules in the Treatment of mild and moderate patients with novel coronavirus pneumonia (COVID-19)                                                             |
| 61 | ChiCTR20000316722020/4/5  | Beijing University of Chinese Medicine                         | Development and application of TCM body regulating protection scheme for the convalescent population of novel coronavirus pneumonia (COVID-19)                                                                   |
| 62 | ChiCTR20000318882020/4/13 | Guangzhou Eighth People's Hospital                             | A medical records based study for "Guangdong Pneumonia NO.1" in the Treatment of Novel Coronavirus Pneumonia (COVID-19)                                                                                          |
| 63 | ChiCTR20000319552020/4/15 | Beijing University of traditional Chinese Medicine             | Study for prevention of novel coronavirus pneumonia (COVID-19) in high risk population by Chinese medicine                                                                                                       |
| 64 | ChiCTR20000319822020/4/16 | The Fifth Affiliated Hospital of Sun Yat-Sen University        | Clinical observation for the effect of Ke-Gan-Li-Yan oral liquid on the relief of laryngeal symptoms of novel coronavirus pneumonia (COVID-19) convalescence and suspected patients and other susceptible people |
| 65 | ChiCTR20000320982020/4/19 | Union Hospital                                                 | Danggui Shaoyao Powder in the synergistic treatment of novel coronavirus pneumonia (COVID-19)                                                                                                                    |

|    |                           |                                                                                                                                                               |                                                                                                                                                                                                                  |
|----|---------------------------|---------------------------------------------------------------------------------------------------------------------------------------------------------------|------------------------------------------------------------------------------------------------------------------------------------------------------------------------------------------------------------------|
| 66 | ChiCTR20000321652020/4/21 | Hubei Provincial Hospital of TCM                                                                                                                              | A multicenter, randomized, double-blind, parallel-controlled trial for Qi-Mai-Fei-Luo-Ping Mixture in the improvement of lung function of novel coronavirus pneumonia (COVID-19) in the convalescent period      |
| 67 | ChiCTR20000322052020/4/23 | Wuhan Hospital Of Traditional Chinese and Western Medicine (Wuhan 1st Hospital)                                                                               | A multicenter randomized, double-blind, placebo-controlled trial for Sheng-Mai-Yin for improvement of the pulmonary heart function related symptoms of convalescence patients of new coronavirus pneumonia       |
| 68 | ChiCTR20000322372020/4/23 | Ezhou Hospital of traditional Chinese Medicine                                                                                                                | A multicenter, randomized, double-blind, placebo-controlled trial for Xiang-Sha-Liu-Jun Pill in the treatment of novel coronavirus pneumonia (COVID-19) decline in digestive function during convalescence       |
| 69 | ChiCTR20000323132020/4/25 | Beijing University of Chinese Medicine, Third Affiliated Hospital                                                                                             | Study for efficacy and safety of Jie-Xing-Jun-Zi granules in the Treatment of convalescent patients of novel coronavirus pneumonia (COVID-19)                                                                    |
| 70 | ChiCTR20000323992020/4/27 | Xiaogan Traditional Chinese Medicine Hospital                                                                                                                 | A multicenter, randomized, double-blind, placebo-controlled trial for Xiaoyao capsule in the improvement of sleep mood disorder of convalescence patients of novel coronavirus pneumonia (COVID-19)              |
| 71 | ChiCTR20000324122020/4/27 | Jiangxi Qingfeng Pharmaceutical Co., Ltd./Shanghai Public Health Clinical Center                                                                              | A medical records based retrospective study for the effectiveness and safety of Xi-Yan-Ping injection combined with conventional protocol in the treatment of common type novel coronavirus pneumonia (COVID-19) |
| 72 | ChiCTR20000324612020/4/29 | Chengdu University of Traditional Chinese Medicine                                                                                                            | A medical records based retrospective study for effect of applying individualized Chinese herbal medicine in treatment of patients with novel coronavirus pneumonia (COVID-19)                                   |
| 73 | ChiCTR20000324802020/4/29 | Institute of Basic Research for Clinical Medicine, China Academy of Chinese Medical Sciences/Guang'anmen Hospital, China Academy of Chinese Medical Sciences/ | Study on data management and diagnosis-treatment mode of TCM intervention for novel coronavirus pneumonia (COVID-19) convalescence                                                                               |

|    |                           |                                                                                                                                              |                                                                                                                                                                                           |
|----|---------------------------|----------------------------------------------------------------------------------------------------------------------------------------------|-------------------------------------------------------------------------------------------------------------------------------------------------------------------------------------------|
| 74 | ChiCTR20000325732020/5/3  | The First Affiliated Hospital of Guangzhou Medical University                                                                                | A randomized, double-blind, controlled trial for Bu-Fei-Huo-Xue Capsule in the treatment of novel coronavirus pneumonia (COVID-19) convalescence patient with "Fei-Pi-Qi-Xu zhen"         |
| 75 | ChiCTR20000326352020/5/4  | Hubei Provincial Hospital of TCM                                                                                                             | Study for Screening of Chinese Patent Drugs in the Rehabilitation Treatment of novel coronavirus pneumonia (COVID-19)                                                                     |
| 76 | ChiCTR20000294302020/2/1  | Hubei Integrated Hospital of Traditional Chinese and Western Medicine                                                                        | Study for the TCM syndrome characteristics of novel coronavirus pneumonia (COVID-19)                                                                                                      |
| 77 | ChiCTR20000294602020/2/2  | 1. Xinhua affiliated hospital, Hubei University of Chinese Medicine; 2. Hubei Provincial Hospital of Integrated Chinese and Western Medicine | The effect of shadowboxing for pulmonary function and quality of life in patients with 2019-nCoV pneumonia (novel coronavirus pneumonia, NCP) in rehabilitation period                    |
| 78 | ChiCTR20000294622020/2/2  | The First Affiliated Hospital of He'nan University of Chinese Medicine                                                                       | Study for clinical characteristics and distribution of TCM syndrome of 2019-nCoV pneumonia (novel coronavirus pneumonia, NCP)                                                             |
| 79 | ChiCTR20000295172020/2/3  | Zhejiang Chinese Medical University                                                                                                          | Chinese medicine prevention and treatment program for suspected 2019-nCoV pneumonia (novel coronavirus pneumonia, NCP): a perspective, double-blind, placebo, randomised controlled trial |
| 80 | ChiCTR20000295182020/2/3  | Zhejiang Chinese Medical University                                                                                                          | Chinese medicine prevention and treatment program for 2019-nCoV pneumonia (novel coronavirus pneumonia, NCP): a perspective, double-blind, placebo, randomised controlled trial           |
| 81 | ChiCTR20000295782020/2/5  | Zhejiang Chinese Medical University                                                                                                          | Chinese medicine prevention and treatment program for 2019-nCoV pneumonia (novel coronavirus pneumonia, NCP): a perspective, sing-arm trial                                               |
| 82 | ChiCTR20000297892020/2/13 | He'nan University of Chinese Medicine                                                                                                        | Randomized controlled trial for TCM syndrome differentiation treatment impacting quality of life of post-discharge patients with novel coronavirus pneumonia (COVID-19)                   |

|    |                           |                                                                                                                                               |                                                                                                                                                                                   |
|----|---------------------------|-----------------------------------------------------------------------------------------------------------------------------------------------|-----------------------------------------------------------------------------------------------------------------------------------------------------------------------------------|
| 83 | ChiCTR20000299782020/2/18 | Tuina Institute, Yueyang Hospital of Integrated Traditional Chinese and Western Medicine, Shanghai University of Traditional Chinese Medicine | A randomized controlled trial for the efficacy of Dao-Yin in the prevention and controlling novel coronavirus pneumonia (COVID-19)                                                |
| 84 | ChiCTR20000299942020/2/19 | Huangshi Hospital of TCM/Faculty of Rehabilitation Medicine, Shanghai University of Chinese Medicine                                          | Liu-Zi-Jue Qigong and Acupressure Therapy for Pulmonary Function and Quality of Life in Patient with Severe novel coronavirus pneumonia (COVID-19): A Randomized Controlled Trial |
| 85 | ChiCTR20000302252020/2/25 | Yueyang Hospital of Integrated Traditional Chinese and Western Medicine, Shanghai University of Traditional Chinese Medicine                  | Clinical Reseach of Acupuncture in the treatment of Novel Coronavirus Pneumonia (COVID-19)                                                                                        |
| 86 | ChiCTR20000303242020/2/28 | Xiangyang Central Hospital, Affiliated Hospital of Hubei University of Arts and Sciences                                                      | Traditional Chinese Medicine 'Zang-Fu Point-pressing' massage for children with novel coronavirus pneumonia (COVID-19)                                                            |
| 87 | ChiCTR20000303862020/2/18 | Hu'nan University of Chinese Medicine                                                                                                         | Study for moxibustion in the preventing of novel coronavirus pneumonia (COVID-19)                                                                                                 |
| 88 | ChiCTR20000303892020/3/1  | Hubei Provincial Hospital of TCM                                                                                                              | A Comparative Study for the Effectiveness of "triple energizer treatment" Method in Repairing Lung Injury in Patients with Novel coronavirus pneumonia (COVID-19)                 |
| 89 | ChiCTR20000304182020/3/1  | The First Affiliated Hospital of Fujian Medical University                                                                                    | Application of rehabilitation lung exercise eight-segment exercise in patients with novel coronavirus pneumonia (COVID-19)                                                        |
| 90 | ChiCTR20000304202020/3/1  | Institute of Integrative Medicine of Dalian Medical University                                                                                | A Clinical Trial Study for the Influence of TCM Psychotherapy on Negative Emotion of Patients with Novel Coronavirus Pneumonia (COVID-19) Based on Network Platform               |
| 91 | ChiCTR20000304322020/3/1  | The First Affiliated Hospital of Fujian Medical University                                                                                    | Application of rehabilitation and Lung eight-segment exercise in front-line nurses in the prevention of novel coronavirus pneumonia (COVID-19) epidemic                           |



|     |                           |                                                                            |                                                                                                                                                                                                            |
|-----|---------------------------|----------------------------------------------------------------------------|------------------------------------------------------------------------------------------------------------------------------------------------------------------------------------------------------------|
| 92  | ChiCTR20000304332020/3/1  | The First Affiliated Hospital of Fujian Medical University                 | Application of Rehabilitation and Lung Eight-segment Exercise in Home Rehabilitation of Survivors from novel coronavirus pneumonia (COVID-19)                                                              |
| 93  | ChiCTR20000304672020/3/2  | Dalian Medical University                                                  | A Randomized Controlled Trial for the Influence of TCM Psychotherapy on Negative Emotion of Patients with Novel Coronavirus Pneumonia (COVID-19) Based on Network Platform                                 |
| 94  | ChiCTR20000304682020/3/2  | Affiliated Hospital of Shandong University of Traditional Chinese Medicine | Study for the key technique of integrative therapy of Novel Coronavirus Pneumonia (COVID-19): the TCM symptoms and treatment regulation                                                                    |
| 95  | ChiCTR20000305282020/3/5  | The Second Clinical College of Guangzhou University of Chinese Medicine    | Application of TCM Nursing Scheme in Patients with Novel Coronavirus Pneumonia (COVID-19)                                                                                                                  |
| 96  | ChiCTR20000305972020/3/8  | Xiyuan Hospital, Chinese Academy of Traditional Chinese Medicine           | Medical records based study for the correlation between Chinese medicine certificate and lung image of novel coronavirus pneumonia (COVID-19)                                                              |
| 97  | ChiCTR20000306062020/3/8  | Xiyuan Hospital, Chinese Academy of Traditional Chinese Medicine           | Medical records based study for the correlation between Chinese medicine certificate and lung image of novel coronavirus pneumonia (COVID-19)                                                              |
| 98  | ChiCTR20000307472020/3/13 | Hubei Provincial Hospital of TCM                                           | A prospective cohort study for comprehensive treatment of Chinese medicine in the treatment of convalescent patients of novel coronavirus pneumonia (COVID-19)                                             |
| 99  | ChiCTR20000308102020/3/15 | Hubei 672 Orthopaedics Hospital of Integrated Chinese & Western Medicine   | Clinical observation and evaluation of traditional Chinese medicine in the treatment of novel coronavirus pneumonia (COVID-19) in Hubei 672 Orthopaedics Hospital of Integrated Chinese & Western Medicine |
| 100 | ChiCTR20000308962020/3/16 | Zhengzhou People's Hospital                                                | Clinical Application and Theoretical Discussion of Fu-Zheng Qing-Fei Thought in Treating Non-Critical Novel Coronavirus Pneumonia (COVID-19)                                                               |
| 101 | ChiCTR20000309382020/3/18 | First Teaching Hospital of Tianjin University of                           | Clinical investigation and reseach on TCM syndrome of novel coronavirus                                                                                                                                    |

|     |                                                                                                                                                                     |                                                                                                                                                                                            |
|-----|---------------------------------------------------------------------------------------------------------------------------------------------------------------------|--------------------------------------------------------------------------------------------------------------------------------------------------------------------------------------------|
|     | Traditional Chinese Medicine                                                                                                                                        | pneumonia (COVID-19)                                                                                                                                                                       |
| 102 | ChiCTR20000309402020/3/18<br>Longhua Hospital Affiliated to Shanghai University of traditional Chinese Medicine                                                     | Study for "Bai-Du Duan Fang" application on the acupoint in the treatment of general type novel coronavirus pneumonia (COVID-19)                                                           |
| 103 | ChiCTR20000309622020/3/20<br>Hospital of Chengdu University of Traditional Chinese Medicine                                                                         | Clinical efficacy of TCM syndrome differentiation in the treatment of severe/critical type of novel coronavirus pneumonia (COVID-19): a prospective, observational, one-arm clinical study |
| 104 | ChiCTR20000309962020/3/20<br>Nursing Department of Xiyuan Hospital, Chinese Academy of Traditional Chinese Medicine                                                 | Effect of Auricular point pressing on insomnia of novel coronavirus pneumonia (COVID-19) patients: a randomized controlled trial.                                                          |
| 105 | ChiCTR20000312032020/3/24<br>Zhengzhou People's Hospital                                                                                                            | Study for the effect of Moxibustion Guidance and Intervention based on internet for the discharged patients with novel coronavirus pneumonia (COVID-19)                                    |
| 106 | ChiCTR20000323672020/4/26<br>Yueyang Integrated Traditional Chinese and Western Medicine Hospital Affiliated to Shanghai University of Traditional Chinese Medicine | Efficacy of Liu-zi-jue in Patients with 2019 Novel Coronavirus Pneumonia (COVID-19): a randomized controlled trial                                                                         |
| 107 | ChiCTR20000327672020/5/9<br>Institute of Basic Research for Clinical Medicine, China Academy of Chinese Medical Sciences                                            | A Medical Records Based Study for Clinical Efficacy and Safety of "clear lung detoxification soup" in the treatment of Novel Coronavirus Pneumonia (COVID-19)                              |
| 108 | ChiCTR20000294362020/2/1<br>The First Hospital of He'nan University of Chinese Medicine                                                                             | A single arm study for evaluation of integrated traditional Chinese and western medicine in the treatment of novel coronavirus pneumonia (COVID-19)                                        |
| 109 | ChiCTR20000294372020/2/1<br>Hubei Provincial Integrated Hospital of traditional Chinese and Western Medicine                                                        | A single arm study for combination of traditional Chinese and Western Medicine in the treatment of novel coronavirus pneumonia (COVID-19)                                                  |

|     |                           |                                                                                                                                                                                                          |                                                                                                                                                                                              |
|-----|---------------------------|----------------------------------------------------------------------------------------------------------------------------------------------------------------------------------------------------------|----------------------------------------------------------------------------------------------------------------------------------------------------------------------------------------------|
| 110 | ChiCTR20000294382020/2/1  | Beijing hospital of Traditional Chinese medicine; Hubei integrated traditional Chinese and Western Medicine Hospital                                                                                     | A randomized controlled trial of integrated TCM and Western Medicine in the treatment of severe 2019-nCoV pneumonia (novel coronavirus pneumonia, NCP)                                       |
| 111 | ChiCTR20000294392020/2/1  | Beijing Hospital of Traditional Chinese Medicine affiliated to Capital Medical University/Beijing institute of Traditional Chinese MedHubei integrated traditional Chinese and Western Medicine Hospital | Combination of traditional chinese medicne and western medicine in the treatment of common type 2019-nCoV pneumonia (novel coronavirus pneumonia, NCP)                                       |
| 112 | ChiCTR20000294612020/2/2  | 1. Xinhua affiliated hospital, Hubei University of Chinese Medicine; 2. Hubei Provincial Hospital of Integrated Chinese and Western Medicine                                                             | A Randomized Controlled Trial for Integrated Traditional Chinese Medicine and Western Medicine in the Treatment of Common Type 2019-nCoV Pneumonia (Novel Coronavirus Pneumonia, NCP)        |
| 113 | ChiCTR20000295492020/2/4  | Hospital of Chengdu University of Traditional Chinese Medicine                                                                                                                                           | Recommendations of Integrated Traditional Chinese and Western Medicine for 2019-nCoV Pneumonia (Novel Coronavirus Pneumonia, NCP)                                                            |
| 114 | ChiCTR20000295582020/2/4  | Hospital of Chengdu University of Traditional Chinese Medicine                                                                                                                                           | Recommendations of Integrated Traditional Chinese and Western Medicine for Diagnosis and Treatment of 2019-nCoV Pneumonia (Novel Coronavirus Pneumonia, NCP) in Sichuan Province             |
| 115 | ChiCTR20000297512020/2/12 | The First Affiliated Hospital of Zhejiang University of Traditional Chinese Medicine                                                                                                                     | Clinical Study for Traditional Chinese Medicine in the Prevention and Treatment of Novel Coronavirus Pneumonia (COVID-19)                                                                    |
| 116 | ChiCTR20000297772020/2/13 | Huangshi Hospital of Traditional Chinese Medicine                                                                                                                                                        | A multicenter, randomized, controlled trial for integrated chinese and western medicine in the treatment of novel coronavirus pneumonia (COVID-19) based on the 'Truncated Torsion' strategy |
| 117 | ChiCTR20000297782020/2/13 | Shuguang Hospital Affiliated to Shanghai University of TCM.                                                                                                                                              | Clinical Study for Traditional Chinese Medicine Combined With Western Medicine in Treatment of Novel Coronavirus Pneumonia (COVID-19)                                                        |
| 118 | ChiCTR20000297882020/2/13 | Dongzhimen Hospital Affiliated to Beijing University of Chinese Medicine                                                                                                                                 | Traditional Chinese medicine cooperative therapy for patients with novel coronavirus pneumonia (COVID-19): a randomized controlled trial                                                     |

|     |                           |                                                                                         |                                                                                                                                                                                                                                                                                                                                                                                    |
|-----|---------------------------|-----------------------------------------------------------------------------------------|------------------------------------------------------------------------------------------------------------------------------------------------------------------------------------------------------------------------------------------------------------------------------------------------------------------------------------------------------------------------------------|
| 119 | ChiCTR20000297902020/2/13 | Shanghai Pulmonary Hospital                                                             | Clinical study for the integration of traditional Chinese and western medicine in the treatment of novel coronavirus pneumonia (COVID-19)                                                                                                                                                                                                                                          |
| 120 | ChiCTR20000298142020/2/14 | Children's Hospital of Fudan University                                                 | Clinical Trial for Integrated Chinese and Western Medicine in the Treatment of Children with Novel Coronavirus Pneumonia (COVID-19)<br><br>A multicenter, randomized, controlled trial for integrated Chinese and western medicine in the treatment of ordinary novel coronavirus pneumonia (COVID-19) based on the ' Internal and External Relieving -Truncated Torsion' strategy |
| 121 | ChiCTR20000298692020/2/15 | Huangshi Hospital of Traditional Chinese Medicine                                       | Comparative study for integrate Chinese and conventional medicine the the treatment of novel coronavirus pneumonia (COVID-19) in Hu'nan province                                                                                                                                                                                                                                   |
| 122 | ChiCTR20000299602020/2/17 | The First Affiliated Hospital of Hu'nan University of traditional Chinese Medicine      | A pilot study for Integrated Chinese and Western Medicine in the treatment of non-critical novel coronavirus pneumonia (COVID-19)                                                                                                                                                                                                                                                  |
| 123 | ChiCTR20000299932020/2/19 | The First Affiliated Hospital of Guangzhou Medical University                           | An open, controlled clinical trial for evaluation of ganovo combined with ritonavir and integrated traditional Chinese and Western medicine in the treatment of novel coronavirus infection (COVID-19)                                                                                                                                                                             |
| 124 | ChiCTR20000300002020/2/19 | Nanchang Ninth Hospital                                                                 | Optimization Protocol of Integrated Traditional Chinese and Western Medicine in the Treatment for Novel Coronavirus Pneumonia (COVID-19)                                                                                                                                                                                                                                           |
| 125 | ChiCTR20000300032020/2/19 | Affiliated Hospital of Chengdu University of Traditional Chinese Medicine               | Traditional Chinese medicine cooperative therapy for patients with Novel coronavirus pneumonia (COVID-19) and its effect on spermatogenesis: a randomized controlled trial                                                                                                                                                                                                         |
| 126 | ChiCTR20000300272020/2/20 | Dongzhimen Hospital Affiliated to Beijing University of Chinese Medicine, Beijing China | Study for evaluation of integrated traditional Chinese and Western Medicine in the treatment of Novel Coronavirus Pneumonia (COVID-19)                                                                                                                                                                                                                                             |
| 127 | ChiCTR20000302192020/2/25 | First Teaching Hospital of Tianjin University of Traditional Chinese Medicine           |                                                                                                                                                                                                                                                                                                                                                                                    |

|     |                           |                                                                                    |                                                                                                                                                                                                                                                                                                                                                                 |
|-----|---------------------------|------------------------------------------------------------------------------------|-----------------------------------------------------------------------------------------------------------------------------------------------------------------------------------------------------------------------------------------------------------------------------------------------------------------------------------------------------------------|
| 128 | ChiCTR20000303052020/2/28 | The Fourth Affiliated Hospital of Zhejiang University School of Medicine           | Multiomics study and emergency plan optimization of spleen strengthening clearing damp and stomach therapy combined with antiviral therapy for novel coronavirus pneumonia (COVID-19)                                                                                                                                                                           |
| 129 | ChiCTR20000303152020/2/28 | Affiliated Hospital of Changchun University of traditional Chinese Medicine        | Clinical Study for Traditional Chinese Medicine in the Prevention and Treatment of Novel Coronavirus Pneumonia (COVID-19)<br>A medical records based real world study for the characteristics and correlation mechanism of traditional Chinese medicine combined with western medicine in the treatment of patients with novel coronavirus pneumonia (COVID-19) |
| 130 | ChiCTR20000306192020/3/8  | The First Affiliated Hospital of Bengbu Medical College                            | A retrospective cohort study for integrated traditional Chinese and western medicine in the treatment of 1071 patients with novel coronavirus pneumonia (COVID-19) in Wuhan                                                                                                                                                                                     |
| 131 | ChiCTR20000307192020/3/11 | Wuhan Hospital of Integrated Traditional Chinese and Western Medicine              | Retrospective study for the efficacy of ulinastatin combined with "clear lung detoxification soup" in the treatment of novel coronavirus pneumonia (COVID-19)                                                                                                                                                                                                   |
| 132 | ChiCTR20000308062020/3/15 | Wuhan 3rd Hospital                                                                 | Novel coronavirus pneumonia (COVID-19) combined with Chinese and Western medicine based on "Internal and External Relieving -Truncated Torsion" strategy                                                                                                                                                                                                        |
| 133 | ChiCTR20000308362020/3/15 | Longhua Hospital Affiliated to Shanghai University of traditional Chinese Medicine | Effectiveness of "Liu-Zi-Jue" combined with respiratory muscle training for respiratory function in novel coronavirus pneumonia (COVID-19) patients: a randomized controlled trial                                                                                                                                                                              |
| 134 | ChiCTR20000309332020/3/18 | The First Affiliated Hospital of Nanchang University                               | A medical records based study for the curative effect of combined traditional Chinese and western medicine in the treatment of severe novel coronavirus pneumonia (COVID-19)                                                                                                                                                                                    |
| 135 | ChiCTR20000320402020/4/18 | Affiliated Hospital of Guangdong Medical University                                |                                                                                                                                                                                                                                                                                                                                                                 |

|     |                           |                                                                                                                                              |                                                                                                                                                                                                              |
|-----|---------------------------|----------------------------------------------------------------------------------------------------------------------------------------------|--------------------------------------------------------------------------------------------------------------------------------------------------------------------------------------------------------------|
| 136 | ChiCTR20000327172020/5/8  | Xi'an International Medical Center Hospital                                                                                                  | Efficacy and safety of high-dose vitamin C combined with traditional Chinese medicine in the treatment of moderate and severe novel coronavirus pneumonia (COVID-19)                                         |
| 137 | ChiCTR20000293082020/1/23 | Wuhan Jinyintan Hospital (Wuhan Infectious Diseases Hospital)                                                                                | A randomized, open-label, blank-controlled trial for the efficacy and safety of lopinavir-ritonavir and interferon-alpha 2b in hospitalization patients with novel coronavirus pneumonia (COVID-19)          |
| 138 | ChiCTR20000293862020/1/28 | Chongqing Public Health Medical Center                                                                                                       | Adjunctive Corticosteroid Therapy for Patients with Severe Novel Coronavirus Pneumonia (COVID-19): a Randomized Controlled Trial                                                                             |
| 139 | ChiCTR20000293872020/1/28 | Chongqing Public Health Medical Center                                                                                                       | Comparison of efficacy and safety of three antiviral regimens in patients with mild to moderate novel coronavirus pneumonia (COVID-19): a randomized controlled trial                                        |
| 140 | ChiCTR20000294312020/2/1  | Affiliated Zhongshan Hospital of Dalian University                                                                                           | Clinical study for the remedy of M1 macrophages target in the treatment of novel coronavirus pneumonia (COVID-19)                                                                                            |
| 141 | ChiCTR20000294592020/2/2  | 1.Xinhua affiliated hospital, Hubei University of Chinese Medicine; 2. Hubei Provincial Hospital of Integrated Chinese and Western Medicine  | The effect of pulmonary rehabilitation for pulmonary function and quality of life in patients with 2019-nCoV pneumonia (novel coronavirus pneumonia, NCP) in rehabilitation period                           |
| 142 | ChiCTR20000294682020/2/2  | Institute of Emergency Medicine and Disaster Medicine<br>Sichuan People's Hospital, Sichuan Academy of Medical Sciences                      | A real-world study for lopinavir/ritonavir (LPV/r) and emtricitabine (FTC) / Tenofovir alafenamide Fumarate tablets (TAF) regimen in the treatment of 2019-nCoV pneumonia (novel coronavirus pneumonia, NCP) |
| 143 | ChiCTR20000294952020/2/2  | 1. Xinhua Affiliated Hospital, Hubei University of Chinese Medicine; 2. Hubei Provincial Hospital of Integrated Chinese and Western Medicine | Traditional Chinese Medicine, Psychological Intervention and Investigation of Mental Health for Patients With 2019-nCoV Pneumonia (Novel Coronavirus Pneumonia, NCP) in Convalescent Period                  |

|     |                          |                                                                                         |                                                                                                                                                                                                                                                       |
|-----|--------------------------|-----------------------------------------------------------------------------------------|-------------------------------------------------------------------------------------------------------------------------------------------------------------------------------------------------------------------------------------------------------|
| 144 | ChiCTR20000294962020/2/3 | The First Hospital of Changsha; The Second Xiangya Hospital of Central South University | A randomized, open label, parallel controlled trial for evaluating the efficacy of recombinant cytokine gene-derived protein injection in eliminating novel coronavirus in patients with 2019-nCoV pneumonia (novel coronavirus pneumonia, NCP)       |
| 145 | ChiCTR20000295392020/2/3 | Tongji Hospital, Tongji Medical College, Huazhong University of Science and Technology  | A randomized, open-label study to evaluate the efficacy and safety of Lopinavir-Ritonavir in patients with mild 2019-nCoV pneumonia (novel coronavirus pneumonia, NCP)                                                                                |
| 146 | ChiCTR20000295412020/2/3 | Zhongnan Hospital of Wuhan University                                                   | A randomised, open, controlled trial for darunavir/cobicistat or Lopinavir/ritonavir combined with thymosin a1 in the treatment of 2019-nCoV pneumonia (novel coronavirus pneumonia, NCP)                                                             |
| 147 | ChiCTR20000295422020/2/3 | Sun Yat sen Memorial Hospital of Sun Yat sen University                                 | Study for the efficacy of chloroquine in patients with 2019-nCoV pneumonia (novel coronavirus pneumonia, NCP)                                                                                                                                         |
| 148 | ChiCTR20000295442020/2/3 | The First Hospital Affiliated to Zhejiang University's Medical School                   | A randomized controlled trial for the efficacy and safety of Baloxavir Marboxil, Favipiravir tablets in 2019-nCoV pneumonia (novel coronavirus pneumonia, NCP) patients who are still positive on virus detection under the current antiviral therapy |
| 149 | ChiCTR20000295482020/2/4 | The First Affiliated Hospital, Zhejiang University School of Medicine                   | Randomized, open-label, controlled trial for evaluating of the efficacy and safety of Baloxavir Marboxil, Favipiravir, and Lopinavir-Ritonavir in the treatment of 2019-nCoV pneumonia (novel coronavirus pneumonia, NCP) patients                    |
| 150 | ChiCTR20000295502020/2/4 | Hospital of Chengdu University of Traditional Chinese Medicine                          | Recommendations for Diagnosis and Treatment of Influenza Patients in the Hospital of Chengdu University of Traditional Chinese Medicine Under the Raging of 2019-nCoV Pneumonia (Novel Coronavirus Pneumonia, NCP)                                    |
| 151 | ChiCTR20000295592020/2/4 | Renmin Hospital of Wuhan University                                                     | Therapeutic effect of hydroxychloroquine on 2019-nCoV pneumonia (novel coronavirus pneumonia, NCP)                                                                                                                                                    |

|     |                          |                                                                                                                  |                                                                                                                                                                                                                                                                                    |
|-----|--------------------------|------------------------------------------------------------------------------------------------------------------|------------------------------------------------------------------------------------------------------------------------------------------------------------------------------------------------------------------------------------------------------------------------------------|
| 152 | ChiCTR20000295692020/2/4 | Xiangyang 1st People's Hospital                                                                                  | Safety and efficacy of umbilical cord blood mononuclear cells conditioned medium in the treatment of severe and critically 2019-nCoV pneumonia (novel coronavirus pneumonia, NCP): a randomized controlled trial                                                                   |
| 153 | ChiCTR20000295722020/2/5 | Xiangyang First People's Hospital                                                                                | Safety and efficacy of umbilical cord blood mononuclear cells in the treatment of severe and critically 2019-nCoV pneumonia (novel coronavirus pneumonia, NCP): a randomized controlled clinical trial                                                                             |
| 154 | ChiCTR20000295732020/2/4 | The First Affiliated Hospital of Medical College of Zhejiang University                                          | A multicenter, randomized, open-label, positive-controlled trial for the efficacy and safety of recombinant cytokine gene-derived protein injection combined with abidole, lopinavir/litonavir in the treatment of 2019-nCoV pneumonia (novel coronavirus pneumonia, NCP) patients |
| 155 | ChiCTR20000295792020/2/5 | Department of Hematology, Tongji Hospital, Tongji Medical College, Huazhong University of Science and Technology | Cytokines profiling and their clinical significance analysis of 2019-nCoV pneumonia (novel coronavirus pneumonia, NCP) patients                                                                                                                                                    |
| 156 | ChiCTR20000295802020/2/5 | Department of Hematology, Tongji Hospital, Tongji Medical College, Huazhong University of Science and Technology | A prospective, single-blind, randomized controlled trial for Ruxolitinib combined with mesenchymal stem cell infusion in the treatment of patients with severe 2019-nCoV pneumonia (novel coronavirus pneumonia, NCP)                                                              |
| 157 | ChiCTR20000295922020/2/5 | Union Hospital, Tongji Medical College, Huazhong University of Science and Technology                            | Study for Arbidol Hydrochloride in the Prophylaxis of Novel Coronavirus Infection in High-risk Population with History of Exposed to 2019-nCoV pneumonia                                                                                                                           |
| 158 | ChiCTR20000296002020/2/6 | The Third People's Hospital of Shenzhen                                                                          | Clinical study for safety and efficacy of Favipiravir in the treatment of 2019-nCoV pneumonia (novel coronavirus pneumonia, NCP)                                                                                                                                                   |
| 159 | ChiCTR20000296022020/2/6 | Hubei Provincial Hospital of TCM                                                                                 | Clinical study for community based prevention and control strategy of novel coronavirus pneumonia (COVID-19) in the isolate suspected and confirmed population                                                                                                                     |



|     |                  |          |                                                                                       |                                                                                                                                                                                                                                   |
|-----|------------------|----------|---------------------------------------------------------------------------------------|-----------------------------------------------------------------------------------------------------------------------------------------------------------------------------------------------------------------------------------|
| 160 | ChiCTR2000029603 | 2020/2/6 | The First Affiliated Hospital of Zhejiang University School of Medicine               | A Randomized, Open-Label, Multi-Centre Clinical Trial Evaluating and Comparing the Safety and Efficiency of ASC09/Ritonavir and Lopinavir/Ritonavir for Confirmed Cases of 2019-nCoV Pneumonia (Novel Coronavirus Pneumonia, NCP) |
| 161 | ChiCTR2000029606 | 2020/2/7 | The First Affiliated Hospital, College of Medicine, Zhejiang University               | Clinical Study for Human Menstrual Blood-Derived Stem Cells in the Treatment of Acute Novel Coronavirus Pneumonia (NCP)                                                                                                           |
| 162 | ChiCTR2000029609 | 2020/2/6 | The Fifth Affiliated Hospital of Sun Yat-Sen University                               | A prospective, open-label, multiple-center study for the efficacy of chloroquine phosphate in patients with 2019-nCoV pneumonia (novel coronavirus pneumonia, NCP)                                                                |
| 163 | ChiCTR2000029621 | 2020/2/7 | Ruijin Hospital, Shanghai Jiao Tong University School of Medicine                     | Clinical study of arbidol hydrochloride tablets in the treatment of 2019-nCoV pneumonia (novel coronavirus pneumonia, NCP)                                                                                                        |
| 164 | ChiCTR2000029625 | 2020/2/7 | The First Affiliated Hospital of Zhejiang University School of Medicine               | Construction of Early Warning and Prediction System for Patients with Severe / Critical 2019-nCoV Pneumonia (Novel Coronavirus Pneumonia, NCP)                                                                                    |
| 165 | ChiCTR2000029626 | 2020/2/7 | The First Affiliated Hospital of Zhejiang University School of Medicine               | Immune Repertoire (TCR & BCR) Evaluation and Immunotherapy Research in Peripheral Blood of 2019-nCoV Pneumonia (Novel Coronavirus Pneumonia, NCP) Patients                                                                        |
| 166 | ChiCTR2000029636 | 2020/2/8 | Union Hospital, Tongji Medical College, Huazhong University of Science and Technology | Efficacy and safety of aerosol inhalation of vMIP in the treatment of 2019-nCoV pneumonia (novel coronavirus pneumonia, NCP): a single arm clinical trial                                                                         |
| 167 | ChiCTR2000029638 | 2020/2/8 | West China Hospital, Sichuan University                                               | Multicenter randomized controlled trial for novel recombinant high-efficiency compound interferon in the treatment of novel coronavirus pneumonia (COVID-19)                                                                      |
| 168 | ChiCTR2000029639 | 2020/2/8 | Department of Psychology, the Fifth Affiliated Hospital Sun Yat-Sen University        | Study for Mental health and psychological status of doctors, nurses and patients in novel coronavirus pneumonia (COVID-19) designated hospital and effect of interventions                                                        |

|     |                           |                                                                                        |                                                                                                                                                                                       |
|-----|---------------------------|----------------------------------------------------------------------------------------|---------------------------------------------------------------------------------------------------------------------------------------------------------------------------------------|
| 169 | ChiCTR20000296562020/2/9  | Wuhan Pulmonary Hospital                                                               | A randomized, open-label study to evaluate the efficacy and safety of low-dose corticosteroids in hospitalized patients with 2019-nCoV pneumonia (novel coronavirus pneumonia, NCP)   |
| 170 | ChiCTR20000296952020/2/10 | Shenzhen Third People's Hospital                                                       | Early Detection of Novel Coronavirus Pneumonia Based on a Novel High-Throughput Mass Spectrometry Analysis With Exhaled Breath                                                        |
| 171 | ChiCTR20000297282020/2/10 | Tongji Hospital, Tongji Medical College, Huazhong University of Science and Technology | A Retrospective Study for Preventive Medication in Tongji Hospital during the epidemic of 2019-nCoV Pneumonia (novel coronavirus pneumonia, NCP)                                      |
| 172 | ChiCTR20000297322020/2/10 | West China Hospital, Sichuan University                                                | Impact of vitamin D deficiency on prognosis of novel coronavirus pneumonia patients                                                                                                   |
| 173 | ChiCTR20000297342020/2/10 | The First People's Hospital of Huaihua                                                 | Epidemiological investigation and clinical characteristics analysis of novel coronavirus pneumonia (NCP)                                                                              |
| 174 | ChiCTR20000297352020/2/10 | Tongji Hospital, Tongji Medical College, Huazhong University of Science and Technology | Risks of Death and Severe cases in Patients with 2019 Novel Coronavirus Pneumonia                                                                                                     |
| 175 | ChiCTR20000297392020/2/11 | The First Affiliated Hospital of Guangzhou Medical University                          | A Multicenter, Randomized, Parallel Controlled Clinical Study of Hydrogen-Oxygen Nebulizer to Improve the Symptoms of Patients With Novel Coronavirus Pneumonia (COVID-19)            |
| 176 | ChiCTR20000297402020/2/11 | The First hospital of Peking University                                                | Efficacy of therapeutic effects of hydroxychloroquine in 2019-nCoV pneumonia (novel coronavirus pneumonia) patients                                                                   |
| 177 | ChiCTR20000297412020/2/11 | The Fifth Affiliated Hospital Sun Yat-Sen University                                   | Efficacy of Chloroquine and Lopinavir/ Ritonavir in mild/general novel coronavirus (CoVID-19) infections: a prospective, open-label, multicenter randomized controlled clinical study |
| 178 | ChiCTR20000297422020/2/11 | Tongji Hospital, Tongji Medical College, Huazhong University of Science and Technology | A randomized, parallel controlled trial for the efficacy and safety of Sodium Aescinate Injection in the treatment of patients with pneumonia (COVID-19)                              |

|     |                  |           |                                                                                                            |                                                                                                                                                                                                                                                                                           |
|-----|------------------|-----------|------------------------------------------------------------------------------------------------------------|-------------------------------------------------------------------------------------------------------------------------------------------------------------------------------------------------------------------------------------------------------------------------------------------|
| 179 | ChiCTR2000029754 | 2020/2/12 | West China Hospital, Sichuan University                                                                    | Study for the Effect of Novel Coronavirus Pneumonia (COVID-19) on the Health of Different People                                                                                                                                                                                          |
| 180 | ChiCTR2000029757 | 2020/2/12 | Institute of Blood Transfusion, Chinese Academy of Medical Sciences                                        | Convalescent plasma for the treatment of severe novel coronavirus pneumonia (COVID-19): a prospective randomized controlled trial                                                                                                                                                         |
| 181 | ChiCTR2000029758 | 2020/2/12 | West China Hospital, Sichuan University                                                                    | Cohort Study of Novel Coronavirus Pneumonia (COVID-19) Critical Ill Patients                                                                                                                                                                                                              |
| 182 | ChiCTR2000029764 | 2020/2/13 | West China Hospital, Sichuan University                                                                    | Imaging Features and Mechanisms of Novel Coronavirus Pneumonia (COVID-19): a Multicenter Study                                                                                                                                                                                            |
| 183 | ChiCTR2000029765 | 2020/2/13 | The First Affiliated Hospital of University of science and technology of China (Anhui Provincial Hospital) | A multicenter, randomized controlled trial for the efficacy and safety of tocilizumab in the treatment of new coronavirus pneumonia (COVID-19)                                                                                                                                            |
| 184 | ChiCTR2000029768 | 2020/2/13 | Zhongnan Hospital of Wuhan University                                                                      | A randomized, open, controlled trial for diammonium glycyrrhizinate enteric-coated capsules combined with vitamin C tablets in the treatment of common novel coronavirus pneumonia (COVID-19) in the basic of clinical standard antiviral treatment to evaluate the safety and efficiency |
| 185 | ChiCTR2000029770 | 2020/2/13 | Union Hospital, Tongji Medical College, Huazhong University of Science and Technology                      | Study for epidemiology, diagnosis and treatment of novel coronavirus pneumonia (COVID-19)                                                                                                                                                                                                 |
| 186 | ChiCTR2000029776 | 2020/2/13 | The First Affiliated of Wenzhou Medical University                                                         | A randomized, open-label, blank-controlled, multicenter trial for Polyinosinic-Polycytidylic Acid Injection in the treatment of novel coronavirus pneumonia (COVID-19)                                                                                                                    |
| 187 | ChiCTR2000029779 | 2020/2/13 | Wuxi People's Hospital                                                                                     | Study for the key issues of the diagnosis and treatment of novel coronavirus pneumonia (COVID-19) based on the medical imaging                                                                                                                                                            |
| 188 | ChiCTR2000029781 | 2020/2/13 | Union Hospital affiliated to Tongji Medical College of Huazhong University of Science and Technology       | A multicenter, randomized, open and controlled trial for the efficacy and safety of Kang-Bing-Du granules in the treatment of novel coronavirus pneumonia (COVID-19)                                                                                                                      |

|     |                  |           |                                                               |                                                                                                                                                                                                                                   |
|-----|------------------|-----------|---------------------------------------------------------------|-----------------------------------------------------------------------------------------------------------------------------------------------------------------------------------------------------------------------------------|
| 189 | ChiCTR2000029782 | 2020/2/13 | Zhejiang Provincial People's Hospital                         | Clinical study for the changes in mental state of medical staff in the department of radiotherapy in a comprehensive tertiary hospital in Zhejiang Province during the epidemic of novel coronavirus infection (COVID-19)         |
| 190 | ChiCTR2000029803 | 2020/2/14 | Renmin Hospital of Wuhan University                           | A prospective, randomized, open-label, parallel controlled trial for the preventive effect of hydroxychloroquine on medical personnel after exposure to COVID-19                                                                  |
| 191 | ChiCTR2000029804 | 2020/2/14 | Wuhan Jinyintan Hospital (Wuhan Infectious Diseases Hospital) | Clinical Application of ECMO in the Treatment of Patients with Very Serious Respiratory Failure due to novel Coronavirus Pneumonia (COVID-19)                                                                                     |
| 192 | ChiCTR2000029805 | 2020/2/14 | Wuhan Jinyintan Hospital (Wuhan Infectious Diseases Hospital) | Analysis of clinical characteristics of severe novel coronavirus pneumonia (COVID-19)                                                                                                                                             |
| 193 | ChiCTR2000029806 | 2020/2/14 | Wuhan Jinyintan Hospital (Wuhan Infectious Diseases Hospital) | Immunomodulatory Therapy for Severe Novel Coronavirus Pneumonia (COVID-19)                                                                                                                                                        |
| 194 | ChiCTR2000029810 | 2020/2/14 | Shenzhen Second People's Hospital                             | Clinical study of a novel high sensitivity nucleic acid assay for novel coronavirus pneumonia (COVID-19) based on CRISPR-cas protein                                                                                              |
| 195 | ChiCTR2000029815 | 2020/2/14 | Guangdong Provincial Hospital of Chinese Medicine             | Psychological survey of frontline medical staff in various regions of China during the epidemic of novel coronavirus pneumonia (COVID-19)                                                                                         |
| 196 | ChiCTR2000029821 | 2020/2/14 | Deyang integrative medicine hospital                          | Based on Delphi Method to Preliminarily Construct a Recommended Protocol for the Prevention of Novel Coronavirus Pneumonia (COVID-19) in Deyang Area by Using Chinese Medicine Technology and its Clinical Application Evaluation |
| 197 | ChiCTR2000029829 | 2020/2/15 | Three Gorges Central Hospital                                 | Medical records based study for Heart-type fatty acid-binding protein on prognosis of novel coronavirus pneumonia (COVID-19)                                                                                                      |

|     |                  |           |                                                                                                                                                                                         |                                                                                                                                                                                  |
|-----|------------------|-----------|-----------------------------------------------------------------------------------------------------------------------------------------------------------------------------------------|----------------------------------------------------------------------------------------------------------------------------------------------------------------------------------|
| 198 | ChiCTR2000029830 | 2020/2/15 | The Fifth Affiliated Hospital of Sun Yat-Sen University                                                                                                                                 | A study for the psychological status, social support, and care needs of tumor patients admitted to a general hospital during the novel coronavirus pneumonia (COVID-19) outbreak |
| 199 | ChiCTR2000029839 | 2020/2/15 | Ningbo First Hospital                                                                                                                                                                   | An observational study on the clinical characteristics, treatment and outcome of novel coronavirus pneumonia (COVID-19)                                                          |
| 200 | ChiCTR2000029849 | 2020/2/15 | The First Affiliated Hospital of Zhengzhou University                                                                                                                                   | Application of Regulating Intestinal Flora in the Treatment of Severe Novel Coronavirus Pneumonia (COVID-19)                                                                     |
| 201 | ChiCTR2000029850 | 2020/2/15 | The First Affiliated Hospital of Zhejiang University, State Key Laboratory for Diagnosis and Treatment of Infectious Diseases, National Clinical Research Center for Infectious Disease | Study for convalescent plasma treatment for severe patients with novel coronavirus pneumonia (COVID-19)                                                                          |
| 202 | ChiCTR2000029851 | 2020/2/15 | Zhongshan Hospital, Fudan University                                                                                                                                                    | A multicenter, randomized controlled trial for the efficacy and safety of Alpha lipoic acid (iv) in the treatment of patients of severe novel coronavirus pneumonia (COVID-19)   |
| 203 | ChiCTR2000029853 | 2020/2/15 | People's Hospital of Guangshan County                                                                                                                                                   | A randomized, open-label, controlled clinical trial for azvudine in the treatment of novel coronavirus pneumonia (COVID-19)                                                      |
| 204 | ChiCTR2000029865 | 2020/2/15 | Union Hospital Affiliated to Tongji Medical College of Huazhong University of Science and Technology                                                                                    | Descriptive study for the clinical characteristics and outcomes of novel coronavirus pneumonia (COVID-19) in cardiovascular patients                                             |
| 205 | ChiCTR2000029866 | 2020/2/15 | Enze Hospital of Taizhou Enze Medical Center (Group)/Taizhou Hospital of Zhejiang Province                                                                                              | Early warning prediction of patients with severe novel coronavirus pneumonia (COVID-19) based on multiomics                                                                      |
| 206 | ChiCTR2000029867 | 2020/2/15 | Beijing You'an Hospital, Capital Medical University                                                                                                                                     | The efficacy and safety of carrimycin treatment in patients with novel coronavirus infectious disease (COVID-19): a multicenter, randomized, open- label controlled trial        |
| 207 | ChiCTR2000029868 | 2020/2/15 | Ruijin Hospital, Shanghai Jiaotong University School of Medicine                                                                                                                        | Hydroxychloroquine treating novel coronavirus pneumonia (COVID-19): a multicenter, randomized controlled trial                                                                   |

|     |                  |           |                                                                                        |                                                                                                                                                                                                                                                               |
|-----|------------------|-----------|----------------------------------------------------------------------------------------|---------------------------------------------------------------------------------------------------------------------------------------------------------------------------------------------------------------------------------------------------------------|
| 208 | ChiCTR2000029870 | 2020/2/15 | Jiangsu Institute of Parasitic Diseases                                                | Evaluation of Rapid Diagnostic Kit (IgM/IgG) for Novel Coronavirus Pneumonia (COVID-19)                                                                                                                                                                       |
| 209 | ChiCTR2000029883 | 2020/2/16 | Tongji Hospital, Tongji Medical College, Huazhong University of Science and Technology | A comparative study on the sensitivity of nasopharyngeal and oropharyngeal swabbing for the detection of influenza virus by real-time PCR                                                                                                                     |
| 210 | ChiCTR2000029898 | 2020/2/16 | Peking University Third Hospital                                                       | A Randomized, Open-label, Parallel, Controlled Trial for Evaluation of the Efficacy and Safety of Chloroquine Phosphate in the treatment of Severe Patients with Novel Coronavirus Pneumonia (COVID-19)                                                       |
| 211 | ChiCTR2000029899 | 2020/2/16 | Peking University Third Hospital                                                       | A Prospective, Multicenter, Open, Randomized Controlled Trial for Evaluation of the Efficacy and Safety of Chloroquine Phosphate and Hydroxychloroquine Sulfate in the treatment of Patients With Mild and Common type novel coronavirus pneumonia (COVID-19) |
| 212 | ChiCTR2000029900 | 2020/2/16 | Renmin Hospital of Wuhan University                                                    | Research for Risks Associated with Novel Coronavirus Pneumonia (COVID-19) in the Hospital Workers and Nosocomial Prevention and Control Strategy                                                                                                              |
| 213 | ChiCTR2000029905 | 2020/2/16 | Zhongnan Hospital of Wuhan University                                                  | A medical records based study of novel coronavirus pneumonia (COVID-19) and influenza virus co-infection                                                                                                                                                      |
| 214 | ChiCTR2000029907 | 2020/2/16 | West China Hospital, Sichuan University                                                | Study for construction and assessment of early warning score of the clinical risk of novel coronavirus (COVID-19) infected patients                                                                                                                           |
| 215 | ChiCTR2000029935 | 2020/2/17 | HwaMei Hospital, University of Chinese Academy of Sciences                             | A Single-arm Clinical Trial for Chloroquine Phosphate in the treatment of Novel Coronavirus Pneumonia 2019 (COVID-19)                                                                                                                                         |
| 216 | ChiCTR2000029939 | 2020/2/17 | HwaMei Hospital, University of Chinese Academy of Sciences                             | A Single-blind, Randomized, Controlled Clinical Trial for Chloroquine Phosphate in the Treatment of Novel Coronavirus Pneumonia 2019 (COVID-19)                                                                                                               |

|     |                           |                                                                                        |                                                                                                                                                                                                                                     |
|-----|---------------------------|----------------------------------------------------------------------------------------|-------------------------------------------------------------------------------------------------------------------------------------------------------------------------------------------------------------------------------------|
| 217 | ChiCTR20000299492020/2/17 | Emergency Department of Zhongnan hospital of Wuhan University                          | A Medical Records Based Study for the Effectiveness of Extracorporeal Membrane Oxygenation in Patients with Severe Novel Coronavirus Pneumonia (COVID-19)                                                                           |
| 218 | ChiCTR20000299522020/2/17 | Chongqing Three Gorges Central Hospital                                                | Medical records based study for epidemiological and clinical characteristics of 2019 novel coronavirus pneumonia (COVID-19) in Chongqing                                                                                            |
| 219 | ChiCTR20000299532020/2/17 | Emergency Department of Zhongnan hospital of Wuhan University                          | Construction and Analysis of Prognostic Predictive Model of Novel Coronavirus Pneumonia (COVID-19)                                                                                                                                  |
| 220 | ChiCTR20000299552020/2/17 | West China Second University Hospital, Sichuan University                              | Evaluation of myocardial injury of novel coronavirus pneumonia (COVID-19) assessed by multimodal MRI imaging                                                                                                                        |
| 221 | ChiCTR20000299582020/2/17 | Zhongnan Hospital of Wuhan University                                                  | A medical records based study for the clinical characteristics of anesthesia novel coronavirus pneumonia (COVID-19) patients during perioperative period and assessment of infection and mental health of Anesthesiology Department |
| 222 | ChiCTR20000299592020/2/17 | West China Second University Hospital, Sichuan University                              | Clinical observation and research of Severe acute respiratory syndrome coronavirus 2(COVID-19) infection in perinatal newborns                                                                                                      |
| 223 | ChiCTR20000299722020/2/17 | Tongji Hospital, Tongji Medical College, Huazhong University of Science and Technology | A randomized controlled trial for the Efficacy of Ultra Short Wave Electrotherapy in the treatment of Novel Coronavirus Pneumonia (COVID-19)                                                                                        |
| 224 | ChiCTR20000299742020/2/18 | Qilu Hospital of Shandong University                                                   | A prospective, multicenter, open-label, randomized, parallel-controlled trial for probiotics to evaluate efficacy and safety in patients infected with 2019 novel coronavirus pneumonia (COVID-19)                                  |
| 225 | ChiCTR20000299752020/2/18 | The First Hospital of Jilin University                                                 | Single arm study for exploration of chloroquine phosphate aerosol inhalation in the treatment of novel coronavirus pneumonia (COVID-19)                                                                                             |

|     |                  |           |                                                                                        |                                                                                                                                                                                   |
|-----|------------------|-----------|----------------------------------------------------------------------------------------|-----------------------------------------------------------------------------------------------------------------------------------------------------------------------------------|
| 226 | ChiCTR2000029981 | 2020/2/18 | Tongji Hospital, Tongji Medical College, Huazhong University of Science and Technology | Study for nucleic acid detection of novel coronavirus pneumonia (COVID-2019) in female vaginal secretions                                                                         |
| 227 | ChiCTR2000029982 | 2020/2/18 | Union Hospital, Tongji Medical College, Huazhong University of Science and Technology  | Study for using multiomics in the diagnosis and treatment of novel coronavirus pneumonia (COVID-19)                                                                               |
| 228 | ChiCTR2000029985 | 2020/2/18 | Sichuan Academy of Medical Sciences & Sichuan Provincial People's Hospital             | Study for mental health status and influencing factors of nurses during epidemic prevention of novel coronavirus pneumonia (COVID-19)                                             |
| 229 | ChiCTR2000029988 | 2020/2/18 | Zhongnan Hospital of Wuhan University                                                  | Clinical Study of Chloroquine Phosphate in the Treatment of Severe Novel Coronavirus Pneumonia (COVID-19)                                                                         |
| 230 | ChiCTR2000029989 | 2020/2/18 | Chinese PLA General Hospital                                                           | A randomized controlled Trial for therapeutic efficacy of Recombinant Human Interferon alpha 1b Eye Drops in the treatment of elderly with novel coronavirus pneumonia (COVID-19) |
| 231 | ChiCTR2000029990 | 2020/2/18 | institute of basic medicine, Chinese Academy of medical sciences                       | Clinical trials of mesenchymal stem cells for the treatment of pneumonitis caused by novel coronavirus pneumonia (COVID-19)                                                       |
| 232 | ChiCTR2000029992 | 2020/2/18 | Zhongshan Hospital Affiliated to Xiamen University                                     | A prospective, randomized, open label, controlled trial for chloroquine and hydroxychloroquine in patients with severe novel coronavirus pneumonia (COVID-19)                     |
| 233 | ChiCTR2000029995 | 2020/2/19 | Shanghai General hospital of Shanghai Jiaotong University                              | Study on anxiety of different populations under novel coronavirus (COVID-19) infection                                                                                            |
| 234 | ChiCTR2000029996 | 2020/2/19 | Beijing Chaoyang Hospital, Capital Medical University                                  |                                                                                                                                                                                   |
| 235 | ChiCTR2000029999 | 2020/2/19 | Shanghai 10th People's Hospital, Tongji University                                     | A clinical study for probiotics in the regulation of intestinal function and microflora structure of novel coronavirus pneumonia (COVID-19)                                       |
| 236 | ChiCTR2000030001 | 2020/2/19 | Heilongjiang Province hospital                                                         | The efficacy and safety of Triazavirin for 2019 novel coronary pneumonia (COVID-19): a multicenter, randomized, double blinded, placebo-controlled trial                          |



|     |                  |           |                                                                                                                |                                                                                                                                                                                                                   |
|-----|------------------|-----------|----------------------------------------------------------------------------------------------------------------|-------------------------------------------------------------------------------------------------------------------------------------------------------------------------------------------------------------------|
| 237 | ChiCTR2000030002 | 2020/2/19 | The First Affiliated Hospital of University of science and technology of China (Anhui Provincial Hospital)     | Clinical study of novel NLRP Inflammasome inhibitor (Tranilast) in the treatment of novel coronavirus pneumonia (COVID-19)                                                                                        |
| 238 | ChiCTR2000030004 | 2020/2/19 | West China Hospital, Sichuan University                                                                        | Effect of Novel Coronavirus Pneumonia (COVID-19) on the Mental Health of College Students                                                                                                                         |
| 239 | ChiCTR2000030005 | 2020/2/19 | Tongji Hospital, Tongji Medical College, Huazhong University of Science and Technology                         | Nucleic acid analysis of novel coronavirus (COVID-19) in morning salivary samples and pharyngeal swabs-a prospectively diagnostic test                                                                            |
| 240 | ChiCTR2000030006 | 2020/2/19 | Union Hospital, Tongji Medical College, Huazhong University of Science and Technology                          | A randomized controlled trial for the efficacy of ozonated autohemotherapy in the treatment of Novel Coronavirus Pneumonia (COVID-19)                                                                             |
| 241 | ChiCTR2000030007 | 2020/2/19 | Multicenter randomized controlled trial for rhG-CSF in the treatment of novel coronavirus pneumonia (COVID-19) | Multicenter randomized controlled trial for rhG-CSF in the treatment of novel coronavirus pneumonia (COVID-19)                                                                                                    |
| 242 | ChiCTR2000030008 | 2020/2/19 | The Fifth Affiliated Hospital of Sun Yat-Sen University                                                        | Correlation between anxiety as well as depression and gut microbiome among staff of hospital during the novel coronavirus pneumonia (COVID-19) outbreak                                                           |
| 243 | ChiCTR2000030010 | 2020/2/19 | Wuhan Jinyintan Hospital (Wuhan Infectious Diseases Hospital)                                                  | A randomized, double-blind, parallel-controlled, trial to evaluate the efficacy and safety of anti-SARS-CoV-2 virus inactivated plasma in the treatment of severe novel coronavirus pneumonia patients (COVID-19) |
| 244 | ChiCTR2000030012 | 2020/2/19 | The First People's Hospital of Chenzhou, Institute of Translational Medicine, University of South China        | Development of anti-2019-nCoV therapeutic antibody from the recovered novel coronavirus pneumonia patients (COVID-19)                                                                                             |
| 245 | ChiCTR2000030013 | 2020/2/20 | Chinese PLA General Hospital                                                                                   | A prospective clinical study for recombinant human interferon alpha 1b spray in the prevention of novel coronavirus (COVID-19) infection in highly exposed medical staffs.                                        |
| 246 | ChiCTR2000030014 | 2020/2/20 | Wuhan Fourth Hospital                                                                                          | Effect of early pulmonary training on lung function and quality of life for novel coronavirus pneumonia (COVID-19) patients                                                                                       |

|     |                  |           |                                                                                                                                              |                                                                                                                                                                                                              |
|-----|------------------|-----------|----------------------------------------------------------------------------------------------------------------------------------------------|--------------------------------------------------------------------------------------------------------------------------------------------------------------------------------------------------------------|
| 247 | ChiCTR2000030015 | 2020/2/20 | Tongji Hospital, Tongji Medical College, Huazhong University of Science and Technology                                                       | Study for the correlation between the incidence and outcome of novel coronary pneumonia (COVID-2019) and ovarian function in women                                                                           |
| 248 | ChiCTR2000030016 | 2020/2/20 | Beihai People's Hospital/Department of respiratory medicine, the First Affiliated Hospital of Guangxi Medical University                     | Basic and clinical study of inhalation of inactivated mycobacterium vaccine in the treatment of Novel coronavirus pneumonia (COVID-19)                                                                       |
| 249 | ChiCTR2000030017 | 2020/2/20 | Renmin Hospital of Wuhan University                                                                                                          | Feature of Multiple Organs in Ultrasound Investigation for Clinical Management and Prognostic Evaluation of Novel Coronavirus Pneumonia (COVID-19)                                                           |
| 250 | ChiCTR2000030019 | 2020/2/20 | Zhongshan Hospital Fudan University                                                                                                          | The COVID-19 Mobile Health Study (CMHS), a large-scale clinical observational registration study using nCapp                                                                                                 |
| 251 | ChiCTR2000030020 | 2020/2/20 | Second Hospital of University of South China, Hengyang                                                                                       | The clinical application and basic research related to mesenchymal stem cells to treat novel coronavirus pneumonia (COVID-19)                                                                                |
| 252 | ChiCTR2000030021 | 2020/2/20 | Department of Respiratory and Critical Care Medicine, Tongji Hospital, Tongji Medical College, Huazhong University of Science and Technology | A medical records based analysis for the clinical characteristics of novel coronavirus pneumonia (COVID-19) in immunocompromised patients                                                                    |
| 253 | ChiCTR2000030028 | 2020/2/20 | West China Hospital, Sichuan University                                                                                                      | Clinical comparative study of PD-1 mAb in the treatment of severe and critical patients with novel coronavirus pneumonia (COVID-19)                                                                          |
| 254 | ChiCTR2000030029 | 2020/2/21 | The First Affiliated Hospital of Zhejiang University School of Medicine                                                                      | A multi-center study on the efficacy and safety of suramin sodium in adult patients with novel coronavirus pneumonia (COVID-19)                                                                              |
| 255 | ChiCTR2000030030 | 2020/2/21 | Tongji Hospital, Tongji Medical College, Huazhong University of Science and Technology                                                       | A medical records based study for acute kidney injury in novel coronavirus pneumonia (COVID-19)                                                                                                              |
| 256 | ChiCTR2000030031 | 2020/2/21 | The Sixth Affiliated Hospital of Guangzhou Medical University (Qingyuan People's Hospital)                                                   | A randomized, double-blind, parallel, controlled trial for comparison of phosphoric chloroquine combined with standard therapy and standard therapy in mild/common patients with novel coronavirus pneumonia |

|     |                  |           |                                                                                     |                                                                                                                                                                                                               |
|-----|------------------|-----------|-------------------------------------------------------------------------------------|---------------------------------------------------------------------------------------------------------------------------------------------------------------------------------------------------------------|
|     |                  |           | (COVID-19)                                                                          |                                                                                                                                                                                                               |
| 257 | ChiCTR2000030032 | 2020/2/21 | Xi'an Chest Hospital                                                                | A medical records based study for ultrasonographic manifestations of new type of novel coronavirus pneumonia (covid-19) in non-critical stage of pulmonary lesions                                            |
| 258 | ChiCTR2000030039 | 2020/2/21 | Affiliated Hospital of Xuzhou Medical University                                    | Clinical study for infusing convalescent plasma to treat patients with new coronavirus pneumonia (COVID-19)                                                                                                   |
| 259 | ChiCTR2000030041 | 2020/2/21 | Zhongnan Hospital of Wuhan University                                               | A single-arm, single-center clinical trial for Azivudine tablets in the treatment of adult novel coronavirus pneumonia (COVID-19)                                                                             |
| 260 | ChiCTR2000030046 | 2020/2/21 | First People's Hospital of Jiangxia District, Wuhan (Union Jiangnan Hospital)       | A single arm trial to evaluate the efficacy and safety of anti-2019-nCoV inactivated convalescent plasma in the treatment of novel coronavirus pneumonia patient (COVID-19)                                   |
| 261 | ChiCTR2000030054 | 2020/2/22 | Zhongshan Hospital Affiliated to Xiamen University                                  | A prospective, open label, randomized, control trial for chloroquine or hydroxychloroquine in patients with mild and common novel coronavirus pulmonary (COVIP-19)                                            |
| 262 | ChiCTR2000030055 | 2020/2/22 | The First Affiliated Hospital of Guangzhou Medical University                       | Multicenter study for the treatment of Dipyridamole with novel coronavirus pneumonia (COVID-19)                                                                                                               |
| 263 | ChiCTR2000030056 | 2020/2/22 | Union Hospital, Tongji Medical College, Huazhong University of Science & Technology | Study for the effect of early endotracheal intubation on the outcome of novel coronavirus pneumonia (COVID-19) patients                                                                                       |
| 264 | ChiCTR2000030058 | 2020/2/22 | Renmin Hospital of Wuhan University                                                 | A multicenter, randomized, double-blind, controlled clinical trial for leflunomide in the treatment of novel coronavirus pneumonia (COVID-19)                                                                 |
| 265 | ChiCTR2000030084 | 2020/2/22 | The First Hospital of Shanxi Medical University                                     | A multicenter study for efficacy of intelligent psychosomatic adjustment system intervention in the treatment of novel coronavirus pneumonia (COVID-19) patients with mild to moderate anxiety and depression |

|     |                  |           |                                                                                       |                                                                                                                                                                                                                                      |
|-----|------------------|-----------|---------------------------------------------------------------------------------------|--------------------------------------------------------------------------------------------------------------------------------------------------------------------------------------------------------------------------------------|
| 266 | ChiCTR2000030086 | 2020/2/22 | Union Hospital, Tongji Medical College, Huazhong University of Science & Technology   | A medical records based study for the impacting on medical providers' infection rate and mental health after performing different anesthesia schemes in cesarean section for novel coronavirus pneumonia (COVID-19) puerperae        |
| 267 | ChiCTR2000030087 | 2020/2/22 | Union Hospital, Tongji Medical College, Huazhong University of Science and Technology | Clinical study for the diagnostic value of pulmonary ultrasound for novel coronavirus pneumonia (COVID-19)                                                                                                                           |
| 268 | ChiCTR2000030088 | 2020/2/23 | The Sixth Medical Center of PLA General Hospital                                      | Umbilical cord Wharton's Jelly derived mesenchymal stem cells in the treatment of severe novel coronavirus pneumonia (COVID-19)                                                                                                      |
| 269 | ChiCTR2000030089 | 2020/2/23 | Shanghai Changzheng Hospital                                                          | A clinical study for the efficacy and safety of Adalimumab Injection in the treatment of patients with severe novel coronavirus pneumonia (COVID-19)                                                                                 |
| 270 | ChiCTR2000030090 | 2020/2/23 | West China Hospital, Sichuan University                                               | A Prospective Randomized Controlled Trial for Home Exercise Prescription Intervention During Epidemic of Novel Coronary Pneumonia (COVID-19) in College Students                                                                     |
| 271 | ChiCTR2000030091 | 2020/2/23 | West China Hospital, Sichuan University                                               | A prospective randomized controlled trial for the home exercise prescription intervention in nursing students during epidemic of novel coronary pneumonia (COVID-19)                                                                 |
| 272 | ChiCTR2000030092 | 2020/2/23 | Union Hospital, Tongji Medical College, Huazhong University of Science & Technology   | Assessment of cardiac function in patients with Novel Coronavirus Pneumonia (COVID-19) by echocardiography and its new techniques                                                                                                    |
| 273 | ChiCTR2000030093 | 2020/2/23 | The Second Hospital of Shanxi Medical University                                      | Study for application of simplified cognitive-behavioral therapy for related emergency psychological stress reaction of medical providers working in the position of treatment and control of novel coronavirus pneumonia (COVID-19) |
| 274 | ChiCTR2000030094 | 2020/2/23 | Chengdu University of Traditional Chinese Medicine                                    | Effects of novel coronavirus pneumonia (COVID-19) on menstruation, TCM body construction and psychological state for female at different ages                                                                                        |

|     |                           |                                                                                                                                                             |                                                                                                                                                                                                                        |
|-----|---------------------------|-------------------------------------------------------------------------------------------------------------------------------------------------------------|------------------------------------------------------------------------------------------------------------------------------------------------------------------------------------------------------------------------|
| 275 | ChiCTR20000300952020/2/23 | The First Affiliated Hospital of Nanchang University                                                                                                        | A medical records based study for optimization and evaluation of the comprehensive diagnosis and treatment of novel coronavirus pneumonia (COVID-19) and the assessment of risk factors for severe pneumonia           |
| 276 | ChiCTR20000300962020/2/23 | Peking University First Hospital                                                                                                                            | Study for establishment of correlation between virological dynamics and clinical features in novel coronavirus pneumonia (COVID-19)                                                                                    |
| 277 | ChiCTR20000301132020/2/23 | Clinical study for safety and efficacy of Favipiravir in the treatment of novel coronavirus pneumonia (COVID-19) with poorly responsive ritonavir/ritonavir | Randomized controlled trial for safety and efficacy of Favipiravir in the treatment of novel coronavirus pneumonia (COVID-19) with poorly responsive ritonavir/ritonavir                                               |
| 278 | ChiCTR20000301142020/2/23 | Peking University People's Hospital                                                                                                                         | Lung ultrasound in the diagnosis, treatment and prognosis of pulmonary lesions of novel coronavirus pneumonia (COVID-19)                                                                                               |
| 279 | ChiCTR20000301152020/2/23 | Tongji Hospital, Tongji Medical College, Huazhong University of Science and Technology                                                                      | A clinical research for the changes of Blood cortisol ACTH level and adrenal morphology in blood cortisol to guide the application of individualized hormone in severe novel coronavirus pneumonia (COVID-19) patients |
| 280 | ChiCTR20000301162020/2/23 | The First Affiliated Hospital of Nanchang University                                                                                                        | Safety and effectiveness of human umbilical cord mesenchymal stem cells in the treatment of acute respiratory distress syndrome of severe novel coronavirus pneumonia (COVID-19)                                       |
| 281 | ChiCTR20000301382020/2/24 | Chinese PLA General Hospital                                                                                                                                | Clinical Trial for Human Mesenchymal Stem Cells in the Treatment of Severe Novel Coronavirus Pneumonia (COVID-19)                                                                                                      |
| 282 | ChiCTR20000301632020/2/24 | Yueyang Hospital of Integrated Traditional Chinese Medicine and Western Medicine Affiliated to Shanghai University of Traditional Medicine                  | A Medical Based Retrospective Real World Study for Assessment of Effectiveness of Comprehensive Traditional Chinese Medicine in the treatment of Novel Coronavirus Pneumonia (COVID-19)                                |
| 283 | ChiCTR20000301642020/2/24 | Union Hospital, Tongji Medical College, Huazhong University of Science and Technology                                                                       | A cross-sectional study of novel coronavirus pneumonia (COVID-19) patients in ICU                                                                                                                                      |

|     |                  |           |                                                                                            |                                                                                                                                                                            |
|-----|------------------|-----------|--------------------------------------------------------------------------------------------|----------------------------------------------------------------------------------------------------------------------------------------------------------------------------|
| 284 | ChiCTR2000030165 | 2020/2/24 | Haihe hospital, Tianjin University                                                         | Clinical study for ozonated autohemotherapy in the treatment of Novel Coronavirus Pneumonia (COVID-19)                                                                     |
| 285 | ChiCTR2000030167 | 2020/2/24 | Renmin Hospital of Wuhan University                                                        | Clinical Trial for Recombinant Human Interleukin-2 in the Treatment of Novel Coronavirus Pneumonia (COVID-19)                                                              |
| 286 | ChiCTR2000030170 | 2020/2/24 | Shanghai Public Health Clinical Center                                                     | Study for safety and efficacy of Jakotinib hydrochloride tablets in the treatment severe and acute exacerbation patients of novel coronavirus pneumonia (COVID-19)         |
| 287 | ChiCTR2000030173 | 2020/2/24 | Hu'nan Yuanpin Cell Biotechnology Co., Ltd/Nanhua Hospital Affiliated to Nanhua University | Key techniques of umbilical cord mesenchymal stem cells for the treatment of novel coronavirus pneumonia (COVID-19) and clinical application demonstration                 |
| 288 | ChiCTR2000030179 | 2020/2/24 | The First Affiliated Hospital of Nanchang University                                       | Experimental study of novel coronavirus pneumonia rehabilitation plasma therapy severe novel coronavirus pneumonia (COVID-19)                                              |
| 289 | ChiCTR2000030185 | 2020/2/24 | Department of Critical Care Medicine, West China Hospital of Sichuan University            | The Value of Critical Care Ultrasound in Rapid Screening, Diagnosis, Evaluation of Effectiveness and Intensive Prevention of Novel Coronavirus Pneumonia (COVID-19)        |
| 290 | ChiCTR2000030187 | 2020/2/24 | Jingzhou First People's Hospital                                                           | Clinical study for Lopinavir and Ritonavir in the treatment of novel coronavirus pneumonia (COVID-19)                                                                      |
| 291 | ChiCTR2000030196 | 2020/2/25 | Central South Hospital, Wuhan University                                                   | A multicenter, single arm, open label trial for the efficacy and safety of CMAB806 in the treatment of cytokine release syndrome of novel coronavirus pneumonia (COVID-19) |
| 292 | ChiCTR2000030198 | 2020/2/25 | West China Hospital, Sichuan University                                                    | Clinical research of pulmonary rehabilitation in survivors due to severe or critical novel coronavirus pneumonia (COVID-19)                                                |
| 293 | ChiCTR2000030218 | 2020/2/25 | Fifth People's Hospital of Ganzhou                                                         | Study of Pinavir / Ritonavir Tablets (Trade Name: Kelizhi) Combined with Xiyanping Injection for Novel Coronavirus Pneumonia (COVID-19)                                    |

|     |                  |           |                                                                                  |                                                                                                                                                                                           |
|-----|------------------|-----------|----------------------------------------------------------------------------------|-------------------------------------------------------------------------------------------------------------------------------------------------------------------------------------------|
| 294 | ChiCTR2000030223 | 2020/2/25 | JC School Of Public Health And Primary Care, The Chinese University Of Hong Kong | Quality of life among Chinese residents during and after novel coronavirus pneumonia (COVID19) outbreak: an online survey                                                                 |
| 295 | ChiCTR2000030226 | 2020/2/25 | The Fourth Hospital of Hebei Medical University                                  | The treatment status and risk factors related to prognosis of hospitalized patients with novel coronavirus pneumonia (COVID-19) in intensive care unit, Hebei, China: a descriptive study |
| 296 | ChiCTR2000030253 | 2020/2/26 | Ganzi Hospital of West China Hospital, Sichuan University                        | Exploration and Research for a new method for detection of novel coronavirus (COVID-19) nucleic acid                                                                                      |
| 297 | ChiCTR2000030254 | 2020/2/26 | Zhongnan Hospital of Wuhan University                                            | A randomized, open-controlled trial for farpiravir tablets in the treatment of novel coronavirus pneumonia (COVID-19)                                                                     |
| 298 | ChiCTR2000030255 | 2020/2/26 | Shanghai University of Traditional Chinese Medicine                              | Efficacy and Safety of Jing-Yin Granule in the treatment of novel coronavirus pneumonia (COVID-19) wind-heat syndrome                                                                     |
| 299 | ChiCTR2000030256 | 2020/2/26 | Daping Hospital, Army Medical University                                         | Medical records based study for epidemic and clinical characteristics of hospitalized patients with novel coronavirus pneumonia (COVID-19) in Huoshenshan hospital, Wuhan                 |
| 300 | ChiCTR2000030257 | 2020/2/26 | Guangdong Second Provincial General Hospital/Puren Hospital of Wuhan City        | The coagulation function of novel coronavirus pneumonia (COVID-19) patients                                                                                                               |
| 301 | ChiCTR2000030258 | 2020/2/26 | The Fourth Affiliated Hospital of Harbin Medical University                      | A multicenter, randomized, controlled trial for efficacy and safety of hydrogen inhalation in the treatment of novel coronavirus pneumonia (COVID-19) patients                            |
| 302 | ChiCTR2000030259 | 2020/2/26 | Shanghai Changzheng Hospital                                                     | Evaluation Danorevir sodium tablets combined with ritonavir in the treatment of novel coronavirus pneumonia (COVID-19): a randomized, open and controlled trial                           |
| 303 | ChiCTR2000030260 | 2020/2/26 | Ganzi Hospital of West China Hospital, Sichuan University                        | Clinical study for individualized nutritional assessment and supportive treatment of novel coronavirus pneumonia (COVID-19) patients in Tibetan Plateau                                   |

- 304 ChiCTR2000030261 2020/2/26 Wuxi Fifth People's Hospital A study for the key technology of mesenchymal stem cells exosomes atomization in the treatment of novel coronavirus pneumonia (COVID-19)
- 305 ChiCTR2000030262 2020/2/26 Shanghai Public Health Clinical Center Clinical study for combination of anti-viral drugs and type I interferon and inflammation inhibitor TFF2 in the treatment of novel coronavirus pneumonia (COVID-19)
- 306 ChiCTR2000030263 2020/2/26 Beijing Geriatric Hospital Investigation and analysis of psychological status of hospital staff during the novel coronavirus pneumonia (COVID-19) epidemic
- 307 ChiCTR2000030264 2020/2/26 Department of critical care, Zhongnan Hospital of Wuhan University ICU healthcare personnel burnout investigation during the fight against novel coronavirus pneumonia (COVID-19)
- 308 ChiCTR2000030265 2020/2/26 The First Affiliated Hospital of Harbin Medical University Clinical research program of continuous renal replacement therapy with adsorption filter for the treatment of the novel coronavirus pneumonia (COVID-19)
- 309 ChiCTR2000030283 2020/2/27 Xianning Central Hospital Correlation between imaging characteristics and laboratory tests of new coronavirus pneumonia (COVID-19)
- 310 ChiCTR2000030290 2020/2/27 Xiamen University Health related quality of life and its influencing factors among front line nurses caring patients with new coronavirus pneumonia (COVID-19) from two hospitals in China
- 311 ChiCTR2000030293 2020/2/27 Shanghai Public Health Clinical Center Clinical observation and research plan of novel coronavirus pneumonia (COVID-19) patients
- 312 ChiCTR2000030304 2020/2/28 The Third Affiliated Hospital of Sun Yat-sen University Protective factors of mental resilience in first-line nurses with novel coronavirus pneumonia (COVID-19)
- 313 ChiCTR2000030312 2020/2/28 First People's Hospital of Jiangxi District A single-center, open-label and single arm trial to evaluate the efficacy and safety of anti-SARS-CoV-2 inactivated convalescent plasma in the treatment of novel coronavirus pneumonia (COVID-19) patient



|     |                  |           |                                                                                                            |                                                                                                                                                                                                                        |
|-----|------------------|-----------|------------------------------------------------------------------------------------------------------------|------------------------------------------------------------------------------------------------------------------------------------------------------------------------------------------------------------------------|
| 314 | ChiCTR2000030317 | 2020/2/28 | West China Hospital, Sichuan University                                                                    | Clinical study for a new type of Gastroscope isolation mask for preventing and controlling the novel coronavirus pneumonia (COVID-19) Epidemic period                                                                  |
| 315 | ChiCTR2000030322 | 2020/2/28 | Xinyang Central Hospital                                                                                   | Identification and Clinical Treatment of Severe novel coronavirus pneumonia (COVID-19) Patients                                                                                                                        |
| 316 | ChiCTR2000030325 | 2020/2/28 | Xiangyang Central Hospital, Affiliated Hospital of Hubei University of Arts and Sciences                   | A survey for mental health of first-line medical providers and to construction of crisis intervention model for novel coronavirus pneumonia (COVID-19) in Xiangyang                                                    |
| 317 | ChiCTR2000030327 | 2020/2/28 | The Second Affiliated hospital of Anhui Medical University                                                 | Analysis of clinical characteristics of novel coronavirus pneumonia (COVID-19)                                                                                                                                         |
| 318 | ChiCTR2000030331 | 2020/2/29 | The First Affiliated Hospital of University of science and technology of China (Anhui Provincial Hospital) | Construction of a Bio information platform for novel coronavirus pneumonia (COVID-19) patients follow-up in Anhui                                                                                                      |
| 319 | ChiCTR2000030333 | 2020/2/29 | Tongji Hospital of Tongji Medical College; Huazhong Science and Technology University                      | A randomized, open-label controlled trial for the efficacy and safety of Pirfenidone in patients with severe and critical novel coronavirus pneumonia (COVID-19)                                                       |
| 320 | ChiCTR2000030334 | 2020/2/29 | College of Life Sciences, Xianlin Campus, Nanjing University/Nanjing Second Hospital                       | microRNA as a marker for early diagnosis of novel coronavirus infection (COVID-19)                                                                                                                                     |
| 321 | ChiCTR2000030363 | 2020/2/29 | Tongji Hospital, Tongji Medical College, Huazhong University of Science and Technology                     | Novel Coronavirus Infected Disease (COVID-19) in children: epidemiology, clinical features and treatment outcome                                                                                                       |
| 322 | ChiCTR2000030381 | 2020/2/29 | First people's hospital of Jiangxi district, Wuhan                                                         | A randomized, open-label, controlled and single-center trial to evaluate the efficacy and safety of anti-SARS-CoV-2 inactivated convalescent plasma in the treatment of novel coronavirus pneumonia (COVID-19) patient |
| 323 | ChiCTR2000030382 | 2020/2/29 | Hubei Provincial Hospital of TCM                                                                           | Construction and application of non-contact doctor-patient interactive diagnosis and treatment mode of moxibustion therapy for novel coronary pneumonia (COVID-19) based on mobile internet                            |

|     |                          |                                                                                                                        |                                                                                                                                                                                                                |
|-----|--------------------------|------------------------------------------------------------------------------------------------------------------------|----------------------------------------------------------------------------------------------------------------------------------------------------------------------------------------------------------------|
| 324 | ChiCTR20000303872020/3/1 | Tongji Hospital of Tongji University                                                                                   | Clinical observation and research of multiple organs injury in severe patients with novel coronavirus pneumonia (COVID-19)                                                                                     |
| 325 | ChiCTR20000303902020/3/1 | Key Laboratory of Ministry of Industry and Information Technology of Biomedical Engineering and Translational Medicine | Research and Development of Diagnostic Assistance Decision Support System for novel coronavirus pneumonia (COVID-19) Based on Big Data Technology                                                              |
| 326 | ChiCTR20000303912020/3/1 | Lishui Central Hospital                                                                                                | A medical records based analysis for antiviral therapy effect on novel coronavirus pneumonia COVID-19 patients                                                                                                 |
| 327 | ChiCTR20000303982020/3/1 | Wuhan Jinyintan Hospital (Wuhan Infectious Diseases Hospital)                                                          | A randomized, double-blind, placebo-controlled trial for evaluation of the efficacy and safety of bismuth potassium citrate capsules in the treatment of patients with novel coronavirus pneumonia (COVID-19). |
| 328 | ChiCTR20000304172020/3/1 | Harbin Peiyou Jiandi Biotechnology Co., Ltd/Heilongjiang Social Rehabilitation Hospital                                | Efficacy and safety of chloroquine phosphate inhalation combined with standard therapy in the treatment of novel coronavirus pneumonia (COVID-19)                                                              |
| 329 | ChiCTR20000304242020/3/1 | He'nan Provincial People's Hospital                                                                                    | A single-center, single-arm clinical trial for azvudine in the treatment of novel coronavirus pneumonia (COVID-19)                                                                                             |
| 330 | ChiCTR20000304362020/3/1 | Shanghai Sixth People's Hospital                                                                                       | Application of flash glucose monitoring to evaluate the effect of blood glucose changes on prognosis in patients with novel coronavirus pneumonia (COVID-19)                                                   |
| 331 | ChiCTR20000304532020/3/2 | The First Affiliated Hospital of Wenzhou Medical University                                                            | Clinical study for the effects of ACEIs/ARBs on the infection of novel coronavirus pneumonia (CoVID-19)                                                                                                        |
| 332 | ChiCTR20000304642020/3/2 | The Third Xiangya Hospital, Central South University                                                                   | Study on the clinical characteristics of novel coronavirus pneumonia (COVID-19)                                                                                                                                |
| 333 | ChiCTR20000304712020/3/2 | Maoming People's Hospital                                                                                              | Efficacy and safety of lipoic acid injection in reducing the risk of progression in common patients with novel coronavirus pneumonia (COVID-19)                                                                |

|     |                          |                                                                                                                                                |                                                                                                                                                                                                 |
|-----|--------------------------|------------------------------------------------------------------------------------------------------------------------------------------------|-------------------------------------------------------------------------------------------------------------------------------------------------------------------------------------------------|
| 334 | ChiCTR20000304722020/3/3 | Shenyang Sixth People's Hospital                                                                                                               | An open and controlled clinical study to evaluate the efficacy and safety of Ganovo combined with ritonavir in the treatment of novel coronavirus pneumonia (COVID-19)                          |
| 335 | ChiCTR20000304752020/3/3 | Peking Union Medical College Hospital, Chinese Academy of Medical Sciences and Peking Union Medical College                                    | Cytosorb in Treating Critically Ill Hospitalized Adult Patients with novel coronavirus pneumonia (COVID-19)                                                                                     |
| 336 | ChiCTR20000304762020/3/3 | Cancer Institute, Longhua Hospital, Shanghai University of Traditional Chinese Medicine                                                        | Study for emotion regulation of traditional Chinese medicine assists for the rehabilitation of patients with novel coronavirus pneumonia (COVID-19)                                             |
| 337 | ChiCTR20000304772020/3/3 | Peking Union Medical College Hospital, Chinese Academy of Medical Sciences and Peking Union Medical College                                    | oXiris Membrane in Treating Critically Ill Hospitalized Adult Patients with novel coronavirus pneumonia (COVID-19)                                                                              |
| 338 | ChiCTR20000304802020/3/3 | Department of Respiratory and Critical Care Medicine, Tongji Hospital of Tongji Medical College, Huazhong University of Science and Technology | Randomized, open, blank controlled trial for the efficacy and safety of recombinant human interferon alpha 1beta in the treatment of Wuhan patients with novel coronavirus pneumonia (COVID-19) |
| 339 | ChiCTR20000304812020/3/3 | Zhongnan Hospital of Wuhan University                                                                                                          | The clinical value of corticosteroid therapy timing in the treatment of novel coronavirus pneumonia (COVID-19): a prospective randomized controlled trial                                       |
| 340 | ChiCTR20000304822020/3/3 | Peking University First Hospital/China Cardiovascular Association                                                                              | A Multicenter, Long-term Follow-up and Registration Study for Myocardial Injury and Prognosis of Novel coronavirus pneumonia (COVID-19)                                                         |
| 341 | ChiCTR20000304842020/3/3 | Beijing Darwin Cell Biotechnology Co., Ltd/Hubei Shiyan Taihe hospital                                                                         | HUMSCs and Exosomes Treating Patients with Lung Injury following Novel Coronavirus Pneumonia (COVID-19)                                                                                         |
| 342 | ChiCTR20000304852020/3/3 | Eergency / Intensive Care Department of Tongji Hospital, Tongji Medical College, Huazhong University of Science and Technology                 | Study for timing of mechanical ventilation for critically ill patients with novel coronavirus pneumonia (COVID-19): A medical records based retrospective Cohort study                          |

|     |                          |                                                                                                                                                                                         |                                                                                                                                                                                        |
|-----|--------------------------|-----------------------------------------------------------------------------------------------------------------------------------------------------------------------------------------|----------------------------------------------------------------------------------------------------------------------------------------------------------------------------------------|
| 343 | ChiCTR20000304872020/3/4 | The First Affiliated Hospital of HeNan University of CM                                                                                                                                 | A single-center, single-arm clinical trial for azvudine in the treatment of novel coronavirus pneumonia (COVID-19)                                                                     |
| 344 | ChiCTR20000304892020/3/4 | Department of Ophthalmology, Tongji Hospital, Tongji Medical College, Huazhong University of Science and Technology                                                                     | Study for the route of ocular surface transmission of novel coronavirus pneumonia (COVID-19) infection and related eye diseases                                                        |
| 345 | ChiCTR20000304902020/3/4 | Changhai Hospital/Huo-Shen-Shan Hospital                                                                                                                                                | To evaluate the efficacy and safety of diammonium glycyrrhizinate enteric-coated capsules combined with hydrogen-rich water in the treatment of novel coronavirus pneumonia (COVID-19) |
| 346 | ChiCTR20000304912020/3/4 | West China Hospital, Sichuan University                                                                                                                                                 | A medical records based study for Comparing Differences of Clinical Features and Outcomes of Novel Coronavirus Pneumonia (COVID-19) Patients between Sichuan Province and Wuhan City   |
| 347 | ChiCTR20000304922020/3/4 | The First Affiliated Hospital of Hu'nan University of traditional Chinese Medicine                                                                                                      | Retrospective study for integrate Chinese and conventional medicine treatment of novel coronavirus pneumonia (COVID-19) in Hu'nan province                                             |
| 348 | ChiCTR20000304932020/3/4 | Renmin Hospital of Wuhan University                                                                                                                                                     | Survey for sleep, anxiety and depression status of Chinese residents during the outbreak of novel coronavirus infected disases (COVID-19)                                              |
| 349 | ChiCTR20000304942020/3/4 | West China Hospital, Sichuan University                                                                                                                                                 | Early risk stratification of the Novel coronavirus infected diseases (COVID-19): a multicenter retrospective study (ERS-COVID-19 study)                                                |
| 350 | ChiCTR20000305032020/3/5 | The First Affiliated Hospital of Zhejiang University, State Key Laboratory for Diagnosis and Treatment of Infectious Diseases, National Clinical Research Center for Infectious Disease | Extracorporeal blood purification therapy using Li's Artificial Liver System for patients with severe novel coronavirus pneumonia (COVID19) patient                                    |
| 351 | ChiCTR20000305392020/3/6 | Guangzhou Eighth People's Hospital                                                                                                                                                      | Study for clinical oral characteristics of patients with novel coronavirus pneumonia (COVID-19) and Effect of 3% hydrogen peroxide gargle on the Intraoral novel coronavirus           |

|     |                          |                                                                                                                                                                                         |                                                                                                                                                                                                          |
|-----|--------------------------|-----------------------------------------------------------------------------------------------------------------------------------------------------------------------------------------|----------------------------------------------------------------------------------------------------------------------------------------------------------------------------------------------------------|
| 352 | ChiCTR20000305402020/3/6 | Tongji Hospital Affiliated to Tongji Medical College of Huazhong University of science and technology                                                                                   | Research for the mechanism of improvement of novel coronavirus pneumonia (COVID-19) patients' pulmonary exudation by continuous renal replacement therapy                                                |
| 353 | ChiCTR20000305412020/3/6 | Shijiazhuang Medical College/Xiamen Medical College                                                                                                                                     | Novel coronavirus pneumonia (COVID-19) epidemic survey of medical students in various provinces and municipalities throughout the country                                                                |
| 354 | ChiCTR20000305422020/3/6 | West China Hospital, Sichuan University                                                                                                                                                 | A clinical study about the diagnosis and prognosis evaluation of novel coronavirus pneumonia (COVID-19) based on viral genome, host genomic sequencing, relative cytokines and other laboratory indexes. |
| 355 | ChiCTR20000305432020/3/6 | Central Theater General Hospital of PLA                                                                                                                                                 | Detection of coronavirus in simultaneously collecting tears and throat swab samples collected from the patients with novel coronavirus pneumonia (COVID-19)                                              |
| 356 | ChiCTR20000305442020/3/6 | Emergency / Intensive Care Department of Tongji Hospital, Tongji Medical College, Huazhong University of Science and Technology                                                         | Study for the risk factors of critically ill patients with novel coronavirus pneumonia (COVID-19)                                                                                                        |
| 357 | ChiCTR20000305562020/3/7 | Anhui Cancer Hospital                                                                                                                                                                   | Clinical study of nano-nose and its extended technology in diagnosis of novel coronavirus pneumonia (COVID-19)                                                                                           |
| 358 | ChiCTR20000305572020/3/7 | The Third Affiliated Hospital of the Second Military Medical University                                                                                                                 | A retrospective study on virus typing, Hematological Immunology and case Review of novel coronavirus infected and convalescent patients (COVID-19)                                                       |
| 359 | ChiCTR20000305592020/3/7 | The First Affiliated Hospital of Zhejiang University, State Key Laboratory for Diagnosis and Treatment of Infectious Diseases, National Clinical Research Center for Infectious Disease | Safety of artificial liver cluster nursing in critically ill patients with novel coronavirus pneumonia (COVID-19)                                                                                        |
| 360 | ChiCTR20000305642020/3/7 | Tongji Hospital, Tongji Medical College, Huazhong University of Science and Technology                                                                                                  | Psychological Intervention of Children with Novel Coronavirus Disease (COVID-19)                                                                                                                         |

|     |                          |                                                                                                                                               |                                                                                                                                                                                                                                                |
|-----|--------------------------|-----------------------------------------------------------------------------------------------------------------------------------------------|------------------------------------------------------------------------------------------------------------------------------------------------------------------------------------------------------------------------------------------------|
| 361 | ChiCTR20000305782020/3/8 | Shandong Provincial Hospital                                                                                                                  | Clinical Prediction and Intervention of Pulmonary Function Impairment in Patients with Novel Coronavirus Pneumonia (COVID-19)                                                                                                                  |
| 362 | ChiCTR20000305792020/3/8 | Shandong Provincial Hospital                                                                                                                  | Risk Factors for Outcomes of Novel Coronavirus Pneumonia (COVID-19)                                                                                                                                                                            |
| 363 | ChiCTR20000305802020/3/8 | Shanghai General Hospital                                                                                                                     | Efficacy and safety of adamumab combined with tozumab in severe and critical patients with novel coronavirus pneumonia (COVID-19)                                                                                                              |
| 364 | ChiCTR20000305812020/3/8 | West China Hospital, Sichuan University                                                                                                       | The immediate psychological impact of novel coronavirus pneumonia (COVID-19) outbreak on medical students in anesthesiology and how they cope                                                                                                  |
| 365 | ChiCTR20000305932020/3/8 | The First Affiliated Hospital, College of Medicine of Zhejiang University                                                                     | Novel coronavirus pneumonia (COVID-19) antiviral related liver dysfunction: a multicenter, retrospective, observational study                                                                                                                  |
| 366 | ChiCTR20000306272020/3/8 | The First Affiliated Hospital of Zhengzhou University                                                                                         | Study for using the healed novel coronavirus pneumonia (COVID-19) patients plasma in the treatment of severe critical cases                                                                                                                    |
| 367 | ChiCTR20000306792020/3/9 | Wuhan Children's Hospital (Wuhan Maternal and Child Healthcare Hospital), Tongji Medical College, Huazhong University of Science & Technology | Cohort study of Novel Coronavirus Pneumonia (COVID-19) in children                                                                                                                                                                             |
| 368 | ChiCTR20000306812020/3/9 | Liaocheng people's hospital                                                                                                                   | An anaesthesia procedure and extubation strategy for reducing patient agitation and cough after extubation that can be used to prevent the spread of novel coronavirus pneumonia (COVID-19) and other infectious viruses in the operating Room |
| 369 | ChiCTR20000306832020/3/9 | The Sixth Affiliated Hospital of Sun Yat-sen University                                                                                       | The prediction value of prognosis of novel coronavirus pneumonia (COVID-19) in elderly patients by modified early warning score (MEWS): a medical records based retrospective observational study                                              |

|     |                           |                                                                                                                                                      |                                                                                                                                                                                                                    |
|-----|---------------------------|------------------------------------------------------------------------------------------------------------------------------------------------------|--------------------------------------------------------------------------------------------------------------------------------------------------------------------------------------------------------------------|
| 370 | ChiCTR20000306862020/3/9  | Peking University Third Hospital                                                                                                                     | The effects of prevention and control measures on treatment and psychological status of cancer patients during the novel coronavirus pneumonia (COVID-19) outbreak                                                 |
| 371 | ChiCTR20000306872020/3/9  | Department of Nephrology, Wuhan Children's Hospital                                                                                                  | Novel coronavirus pneumonia (COVID-19) associated kidney injury in children                                                                                                                                        |
| 372 | ChiCTR20000306902020/3/10 | The Third Affiliated Hospital of the Second Military Medical University                                                                              | Study for immune cell subsets in convalescent patients with novel coronavirus pneumonia (COVID-19)                                                                                                                 |
| 373 | ChiCTR20000306972020/3/10 | Ningbo First Hospital, Ningbo Hospital of Zhejiang University                                                                                        | A multi-center, open-label observation study for psychological status and intervention efficacy of doctors, nurses, patients and their families in novel coronavirus pneumonia (COVID-19) designated hospitals     |
| 374 | ChiCTR20000307002020/3/10 | Shenzhen Hepalink Pharmaceutical Group Co., Ltd/Union Hospital affiliated to Tongji Medical College of Huazhong University of Science and Technology | Study for the Efficacy and safety of Prolongin (Enoxaparin Sodium Injection) in treatment of novel coronavirus pneumonia (COVID-19) adult common patients                                                          |
| 375 | ChiCTR20000307012020/3/10 | Shenzhen Hepalink Pharmaceutical Group Co., Ltd/Union Hospital affiliated to Tongji Medical College of Huazhong University of Science and Technology | A randomized, parallel controlled open-label trial for the efficacy and safety of Prolongin (Enoxaparin Sodium Injection) in the treatment of adult patients with novel coronavirus pneumonia (COVID-19)           |
| 376 | ChiCTR20000307022020/3/10 | China-Japan Friendship Hospital                                                                                                                      | Using plasma of the convalescent in the treatment of novel coronavirus pneumonia (COVID-19) common patient: a prospective clinical trial                                                                           |
| 377 | ChiCTR20000307032020/3/10 | Xiangya Hospital of Central South University                                                                                                         | A randomized, blinded, controlled, multicenter clinical trial to evaluate the efficacy and safety of Ixekizumab combined with conventional antiviral drugs in patients with novel coronavirus pneumonia (COVID-19) |
| 378 | ChiCTR20000307072020/3/11 | Ganzi Hospital of West China Hospital, Sichuan University                                                                                            | Retrospective study on novel coronavirus pneumonia (COVID-19) in Tibetan Plateau                                                                                                                                   |

|     |                           |                                                                                                   |                                                                                                                                                                                     |
|-----|---------------------------|---------------------------------------------------------------------------------------------------|-------------------------------------------------------------------------------------------------------------------------------------------------------------------------------------|
| 379 | ChiCTR20000307082020/3/11 | West China Hospital, Sichuan University                                                           | Cross sectional study of dialysis treatment and mental status under the outbreak of novel coronavirus pneumonia (COVID-2019) in China                                               |
| 380 | ChiCTR20000307162020/3/11 | Huazhong University of Science and Technology<br>Department of Emergency, Tongji Hospital, Tongji | Shedding of SARS-CoV-2 in human semen and evaluation of reproductive health of novel coronavirus pneumonia (COVID-19) male patients                                                 |
| 381 | ChiCTR20000307172020/3/11 | Medical College, Huazhong University of Science and Technology                                    | A medical records based study for risk assessment and treatment timing of invasive fungal infection in novel coronavirus pneumonia (COVID-19) critical patients                     |
| 382 | ChiCTR20000307182020/3/11 | Zhongnan Hospital of Wuhan University                                                             | Randomized controlled trial for Chloroquine Phosphate in the Treatment of novel coronavirus pneumonia (COVID-19)                                                                    |
| 383 | ChiCTR20000307202020/3/11 | Hubei Provincial Hospital of TCM                                                                  | Prognosis Investigation and Intervention Study on Patients with novel coronavirus pneumonia (COVID-19) in recovery period Based on Community Health Management                      |
| 384 | ChiCTR20000307212020/3/12 | Affiliated Hospital of Guangdong Medical University                                               | A comparative study for the sensitivity of induced sputum and throat swabs for the detection of SARS-CoV-2 by real-time PCR in patients with novel coronavirus pneumonia (COVID-19) |
| 385 | ChiCTR20000307222020/3/12 | Shanghai First People's Hospital                                                                  | Auscultatory characteristics of novel coronavirus pneumonia (COVID-19)                                                                                                              |
| 386 | ChiCTR20000307392020/3/13 | Shandong Provincial Chest hospital                                                                | Exploration of the Clinical Characteristics of Patients with Novel Coronavirus Pneumonia (COVID-19) and Its Differences from Patients with Severe Influenza A and MERS              |
| 387 | ChiCTR20000307402020/3/13 | Shandong Provincial Chest hospital                                                                | Analysis of the incidence and risk factors of ARDS in patients with Novel Coronavirus Pneumonia (COVID-19).                                                                         |
| 388 | ChiCTR20000307412020/3/13 | Shandong Provincial Chest hospital                                                                | Observational Study for Prone Position Ventilation and Conventional Respiratory Support in ARDS Patients with Novel Coronavirus Pneumonia (COVID-19)                                |



|     |                  |           |                                                                                                                         |                                                                                                                                                                             |
|-----|------------------|-----------|-------------------------------------------------------------------------------------------------------------------------|-----------------------------------------------------------------------------------------------------------------------------------------------------------------------------|
| 389 | ChiCTR2000030742 | 2020/3/13 | Department of Geriatrics, Tongji Hospital, Tongji Medical College, Huazhong University of Science and Technology        | Characteristics, prognosis, and treatments effectiveness of critically ill patients with Novel Coronavirus Pneumonia (COVID-19)                                             |
| 390 | ChiCTR2000030744 | 2020/3/13 | Shandong Provincial Chest hospital                                                                                      | Clinical Application of ECMO(or Ultra-Protective Lung Mechanical Ventilation) in the Treatment of Patients with ARDS due to novel Coronavirus Pneumonia (COVID-19)          |
| 391 | ChiCTR2000030750 | 2020/3/13 | Shenzhen Third People's Hospital/Shenzhen Ruipuxun Academy for Stem Cell & Regenerative Medicine                        | A clinical study for effectiveness and safety evaluation for recombinant chimeric COVID-19 epitope DC vaccine in the treatment of novel coronavirus pneumonia               |
| 392 | ChiCTR2000030752 | 2020/3/13 | Shandong Provincial Chest hospital                                                                                      | A medical records based analysis for risk factors for death in patients with Novel Coronavirus Pneumonia (COVID-19)                                                         |
| 393 | ChiCTR2000030753 | 2020/3/13 | Shandong Provincial Chest hospital                                                                                      | A medical records based analysis of the Incidence and Risk Factors of Ventilator-associated Pneumonia in ARDS Patients with Novel Coronavirus Pneumonia (COVID-19)          |
| 394 | ChiCTR2000030754 | 2020/3/13 | The Third Affiliated Hospital of Sun Yat-sen University                                                                 | Medical records based study for the accuracy of SARS-CoV-2 IgM antibody screening for diagnosis of novel coronavirus pneumonia (COVID-19)                                   |
| 395 | ChiCTR2000030755 | 2020/3/13 | Department of Geriatrics, Tongji Hospital, Tongji Medical College, Huazhong University of Science and Technology        | A medical records based study for characteristics, prognosis of elderly patients with Novel Coronavirus Pneumonia (COVID-19) in Wuhan area                                  |
| 396 | ChiCTR2000030756 | 2020/3/13 | Shenzhen Hospital of Southern Medical University                                                                        | Detection of SARS-CoV-2 in EPS / semen of patients with novel coronavirus pneumonia (COVID-19)                                                                              |
| 397 | ChiCTR2000030757 | 2020/3/13 | Clinical Research Institute, Shenzhen-Peking University-The Hong Kong University of Science & Technology Medical Center | Impact of Novel Coronavirus Pneumonia (COVID-19) Epidemic Period on the Management of investigator-initiated clinical trial and the resilience of medical service providers |
| 398 | ChiCTR2000030758 | 2020/3/13 | Eergency / Intensive Care Department of Tongji Hospital, Tongji Medical College, Huazhong University of Science         | A medical records based study for sedation and Analgesia Usage in critically ill patients with novel coronavirus pneumonia (COVID-19)                                       |

and Technology

- 399 ChiCTR20000307602020/3/13 Zhejiang Hospital A medical records based study for clinical characteristics of 2019 novel coronavirus pneumonia (COVID-19) in Zhejiang province, China
- 400 ChiCTR20000307612020/3/13 Renji Hospital Affiliated to Shanghai Jiaotong University School of Medicine Continuous renal replacement therapy (CRRT) alleviating inflammatory response in severe patients with novel coronavirus pneumonia (COVID-19) associated with renal injury: A Prospective study
- 401 ChiCTR20000307632020/3/13 Shandong Provincial Chest hospital A Medical Records Based analysis for Risk Factors for Outcomes After Respiratory Support in Patients with ARDS Due to Novel Coronavirus Pneumonia (COVID-19)
- 402 ChiCTR20000307642020/3/13 Xiyuan Hospital of China Academy of Chinese Medical Sciences Research for the influence of epidemic of novel coronavirus pneumonia (COVID-19) on sleep, psychological and chronic diseases among different populations
- 403 ChiCTR20000307682020/3/14 Zhongnan Hospital of Wuhan University Study for the Psychological Status of Medical Staff of Otolaryngology Head and Neck Surgery in Hubei Province under the Epidemic of novel coronavirus pneumonia (COVID-19)
- 404 ChiCTR20000307712020/3/14 The 2nd Xiangya Hospital of CSU Screening and identification of peripheral blood biomarkers in patients with novel coronavirus pneumonia (COVID-19) based on multiomics studies
- 405 ChiCTR20000307722020/3/14 Huashan Hospital Fudan University Application of blood purification in the treatment of novel coronavirus pneumonia (COVID-19)
- 406 ChiCTR20000307782020/3/14 Ningbo First Hospital A medical records based study for epidemic and clinical features of novel coronavirus pneumonia (COVID-19) in Ningbo First Hospital
- 407 ChiCTR20000307792020/3/14 Shanghai Changzheng Hospital A clinical trial for Ulinastatin Injection in the treatment of patients with

|     |                  |           |                                                                                                      |                                                                                                                                                                          |
|-----|------------------|-----------|------------------------------------------------------------------------------------------------------|--------------------------------------------------------------------------------------------------------------------------------------------------------------------------|
|     |                  |           | severe novel coronavirus pneumonia (COVID-19)                                                        |                                                                                                                                                                          |
| 408 | ChiCTR2000030782 | 2020/3/14 | Cangzhou People's Hospital                                                                           | The value of CD4 / CD8 cells, CRP / ALB and APCHEII in novel coronavirus pneumonia (COVID-19)                                                                            |
| 409 | ChiCTR2000030784 | 2020/3/14 | The People's Hospital of Guangxi Zhuang Autonomous Region                                            | A study for clinical characteristics of novel coronavirus pneumonia (COVID-19) patients follow-up in Guangxi                                                             |
| 410 | ChiCTR2000030795 | 2020/3/15 | Tongji Hospital, Tongji Medical College, Huazhong University of Science and Technology               | A multicenter retrospective study of rheumatic patients with novel coronavirus pneumonia (COVID-19)                                                                      |
| 411 | ChiCTR2000030796 | 2020/3/15 | The Second Hospital of Hebei Medical University                                                      | Clinical characteristics and treatment of novel coronavirus pneumonia (COVID-19)                                                                                         |
| 412 | ChiCTR2000030797 | 2020/3/15 | Shanghai Fifth People's Hospital, Fudan University                                                   | Clinical study for hemodynamics and cardiac arrhythmia of novel coronavirus pneumonia (COVID-19) patients                                                                |
| 413 | ChiCTR2000030798 | 2020/3/15 | Wuhan 3rd Hospital                                                                                   | A medical records based study for clinical characteristics of novel coronavirus pneumonia (COVID-19)                                                                     |
| 414 | ChiCTR2000030799 | 2020/3/15 | Tongji Hospital, Tongji Medical College, Huazhong University of Science and Technology               | Establishment and validation of Premonitory model of deterioration of the 2019 novel corona virus pneumonia (COVID-19)                                                   |
| 415 | ChiCTR2000030801 | 2020/3/15 | Wuhan 3rd Hospital                                                                                   | Analysis of risk factors affecting prognosis of elderly patients infected with novel coronavirus pneumonia (COVID-19): a single-center retrospective observational study |
| 416 | ChiCTR2000030802 | 2020/3/15 | Tongji Hospital, Tongji Medical College of HUST                                                      | A retrospective study of clinical drug therapy in patients with novel coronavirus pneumonia (COVID-19)                                                                   |
| 417 | ChiCTR2000030803 | 2020/3/15 | Union Hospital affiliated to Tongji Medical College of Huazhong University of Science and Technology | Collection and analysis of clinical data in severe and critically ill patients with novel coronavirus pneumonia (COVID-19)                                               |
| 418 | ChiCTR2000030805 | 2020/3/15 | Tongji Hospital, Tongji Medical College, Huazhong University of Science & Technology                 | Quantitative CT characteristic estimate the severity of novel coronavirus pneumonia (COVID-19)                                                                           |

|     |                           |                                                                                                      |                                                                                                                                                                                                                                |
|-----|---------------------------|------------------------------------------------------------------------------------------------------|--------------------------------------------------------------------------------------------------------------------------------------------------------------------------------------------------------------------------------|
| 419 | ChiCTR20000308072020/3/15 | Tongji Hospital, Tongji Medical College, Huazhong University of Science and Technology(HUST)         | Clinical characteristics and prognosis of cancer patients with novel coronavirus pneumonia (COVID-19)                                                                                                                          |
| 420 | ChiCTR20000308092020/3/15 | Tongji Hospital, Tongji Medical College, Huazhong University of Science and Technology(HUST)         | A medical records based study for clinical outcomes and follow-up of novel coronavirus pneumonia (COVID-19) patients                                                                                                           |
| 421 | ChiCTR20000308122020/3/15 | Shanghai Ninth People's Hospital                                                                     | Study for the virus molecular evolution which driven the immune-pathological responses and the protection mechanisms of novel coronavirus pneumonia (COVID-19) patients                                                        |
| 422 | ChiCTR20000308142020/3/15 | Tongji hospital, Tongji medical College, Huazhong University of Science and Technology               | A medical records based analysis of clinical evidence of human-to-human transmission of novel coronavirus pneumonia (COVID-19) by conjunctival route                                                                           |
| 423 | ChiCTR20000308162020/3/15 | Tongji hospital, Tongji medical College, Huazhong University of Science and Technology               | Nutritional risk assessment and outcome prediction of critically ill novel coronavirus pneumonia (COVID-19) patients                                                                                                           |
| 424 | ChiCTR20000308172020/3/15 | Union Hospital affiliated to Tongji Medical College of Huazhong University of Science and Technology | Multicenter clinical study of evaluation of multi-organ function in patients with novel coronavirus pneumonia (COVID-19) by ultrasound                                                                                         |
| 425 | ChiCTR20000308182020/3/15 | The First Affiliated Hospital, He'nan Traditional Chinese Medicine University                        | A medical records based study for the value of Lymphocyte subsets in the diagnose and treatment of novel coronavirus pneumonia (COVID-19)                                                                                      |
| 426 | ChiCTR20000308192020/3/15 | Wuhan 3rd Hospital                                                                                   | Retrospective analysis of digestive system symptoms in 600 cases of novel coronavirus pneumonia (COVID-19) in Guanggu district, Wuhan                                                                                          |
| 427 | ChiCTR20000308302020/3/15 | Hwa Mei Hospital, University of Chinese Academy of Sciences                                          | Development and application of novel coronavirus pneumonia (COVID-19) intelligent image classification system based on deep learning                                                                                           |
| 428 | ChiCTR20000308312020/3/15 | Tongji Hospital, Tongji Medical College, Huazhong University of Science and Technology               | The analysis of related factors on improving oxygenation status by endotracheal intubation ventilation in severe patients suffered from novel coronavirus pneumonia (COVID-19): a single center and descriptive study in Wuhan |

|     |                  |           |                                                                                                      |                                                                                                                                                                                                     |
|-----|------------------|-----------|------------------------------------------------------------------------------------------------------|-----------------------------------------------------------------------------------------------------------------------------------------------------------------------------------------------------|
| 429 | ChiCTR2000030832 | 2020/3/15 | Tongji Hospital, Tongji Medical College, Huazhong University of Science and Technology(HUST)         | Study for the pathogenesis and effective intervention of mood disorders caused by the novel coronavirus pneumonia (COVID-19)                                                                        |
| 430 | ChiCTR2000030834 | 2020/3/15 | Tongji Hospital, Tongji Medical College, Huazhong University of Science and Technology(HUST)         | Epidemiological Characteristics and Antibody Levels of novel coronavirus pneumonia (COVID-19) of Pediatric Medical Staff working in Quarantine Area                                                 |
| 431 | ChiCTR2000030835 | 2020/3/15 | the First Affiliated Hospital of Xinxiang Medical University                                         | Clinical study for the efficacy of Mesenchymal stem cells (MSC) in the treatment of severe novel coronavirus pneumonia (COVID-19)                                                                   |
| 432 | ChiCTR2000030838 | 2020/3/15 | Wuhan University Central South Hospital                                                              | Development of warning system with clinical differential diagnosis and prediction for severe type of novel coronavirus pneumonia (COVID-19) patients based on artificial intelligence and CT images |
| 433 | ChiCTR2000030839 | 2020/3/15 | Tongren Hospital, Shanghai Jiao Tong University School of Medicine                                   | Preliminary screening of novel coronavirus pneumonia (COVID-19) by special laboratory examination and CT imaging before surgery                                                                     |
| 434 | ChiCTR2000030841 | 2020/3/15 | Union Hospital affiliated to Tongji Medical College of Huazhong University of Science and Technology | Exploratory study for Immunoglobulin From Cured COVID-19 Patients in the Treatment of Acute Severe novel coronavirus pneuvirus (COVID-19)                                                           |
| 435 | ChiCTR2000030849 | 2020/3/15 | Zhengzhou People's Hospital                                                                          | Investigation on psychological status of novel coronavirus pneumonia (COVID-19) rehabilitation patients in Zhengzhou City and research on coping strategies                                         |
| 436 | ChiCTR2000030850 | 2020/3/15 | the First Affiliated Hospital, Guangzhou University of Chinese Medicine                              | Study for the physical and mental health status of medical workers under the novel coronavirus pneumonia (COVID-19) epidemic                                                                        |
| 437 | ChiCTR2000030852 | 2020/3/16 | Beijing Anzhen Hospital, Capital Medical University                                                  | Factors associated with death in patients with novel coronavirus pneumonia (COVID-19)                                                                                                               |
| 438 | ChiCTR2000030853 | 2020/3/16 | The Third Affiliated Hospital of Zunyi Medical University                                            | Evaluation of the protective effect of dexmedetomidine on patients with severe novel coronavirus pneumonia (COVID-19)                                                                               |

|     |                  |           |                                                                                            |                                                                                                                                                                                                                 |
|-----|------------------|-----------|--------------------------------------------------------------------------------------------|-----------------------------------------------------------------------------------------------------------------------------------------------------------------------------------------------------------------|
| 439 | ChiCTR2000030854 | 2020/3/16 | The First Affiliated Hospital, College of Medicine, Zhejiang University                    | A clinical multicenter study for the occurrence, development and prognosis of novel coronavirus pneumonia (COVID-19)                                                                                            |
| 440 | ChiCTR2000030855 | 2020/3/16 | The Third Affiliated Hospital of Zunyi Medical University                                  | Study for the effect of external diaphragmatic pacing assisted invasive ventilation and weaning in patients with severe novel coronavirus pneumonia (COVID-19)                                                  |
| 441 | ChiCTR2000030856 | 2020/3/16 | Tongji Hospital of Tongji Medical College of Huazhong University of Science and Technology | An artificial intelligence assistant system for suspected novel coronavirus pneumonia (COVID-19) based on chest CT                                                                                              |
| 442 | ChiCTR2000030857 | 2020/3/16 | Tongji Hospital of Tongji Medical College of Huazhong University of Science and Technology | Clinical study for bronchoscopic alveolar lavage in the treatment of critically trachea intubation patients with new coronavirus pneumonia (COVID-19)                                                           |
| 443 | ChiCTR2000030858 | 2020/3/16 | Hubei Cancer Hospital                                                                      | Clinical characteristics and outcomes of 483 mild patients with novel coronavirus pneumonia (COVID-19) in Wuhan, China during the outbreak: A single-center, retrospective study from the mobile cabin hospital |
| 444 | ChiCTR2000030859 | 2020/3/16 | Wuhan 3rd Hospital                                                                         | A medical based analysis for influencing factors of death of novel coronavirus pneumonia (COVID-19) patients in Wuhan third hospital                                                                            |
| 445 | ChiCTR2000030860 | 2020/3/16 | Tongji Hospital, Tongji Medical College, Huazhong University of Science and Technology     | A medical records based study for investigation of dynamic profile of RT-PCR test for SARS-CoV-2 nucleic acid of novel coronavirus pneumonia (COVID-19) patients                                                |
| 446 | ChiCTR2000030861 | 2020/3/16 | The First Affiliated Hospital of the Guangzhou Medical University                          | Development and application of a new intelligent robot for novel coronavirus (2019-nCoV) oropharyngeal sampling                                                                                                 |
| 447 | ChiCTR2000030862 | 2020/3/16 | Tongji Hospital of Tongji Medical College of Huazhong University of Science and Technology | Correlation analysis of blood eosinophil cell levels and clinical type category of novel coronavirus pneumonia (COVID-19): a medical records based retrospective study                                          |
| 448 | ChiCTR2000030863 | 2020/3/16 | Jinling Hospital, Medical School of Nanjing University                                     | Clinical and CT imaging Characteristics of novel coronavirus pneumonia (COVID-19): An Multicenter Cohort Study                                                                                                  |

|     |                  |           |                                                                                                                                                                                                         |                                                                                                                                                                                     |
|-----|------------------|-----------|---------------------------------------------------------------------------------------------------------------------------------------------------------------------------------------------------------|-------------------------------------------------------------------------------------------------------------------------------------------------------------------------------------|
| 449 | ChiCTR2000030865 | 2020/3/16 | Tongji Hospital, Huazhong University of Science and Technology                                                                                                                                          | Establishment of an early warning model for maternal and child vertical transmission of COVID-19 infection                                                                          |
| 450 | ChiCTR2000030866 | 2020/3/16 | The First Hospital of Changsha                                                                                                                                                                          | Open-label, observational study of human umbilical cord derived mesenchymal stem cells in the treatment of severe and critical patients with novel coronavirus pneumonia (COVID-19) |
| 451 | ChiCTR2000030892 | 2020/3/16 | State Key Laboratory of Respiratory Disease, National Clinical Center for Respiratory Disease, Guangzhou Institute of Respiratory Health, The First Affiliated Hospital of Guangzhou Medical University | Efficacy and Safety of Pirfenidone in the Treatment of Severe Post-Novel Coronavirus Pneumonia (COVID-19) Fibrosis: a prospective exploratory experimental medical study            |
| 452 | ChiCTR2000030893 | 2020/3/16 | Zhengzhou People's Hospital                                                                                                                                                                             | Study for effects of crisis intervention based on positive psychology for medical staffs working in the novel coronavirus pneumonia (COVID-19) field                                |
| 453 | ChiCTR2000030894 | 2020/3/16 | Peking University First Hospital                                                                                                                                                                        | Favipiravir Combined With Tocilizumab in the Treatment of novel coronavirus pneumonia (COVID-19) - A Multicenter, Randomized, Controlled Trial                                      |
| 454 | ChiCTR2000030895 | 2020/3/16 | Tongji Hospital, Tongji Medical College, Huazhong University of Science and Technology                                                                                                                  | Retrospective and Prospective Study for Nosocomial infection in Stomatology Department under the Background of novel coronavirus pneumonia (COVID-19) epidemic period               |
| 455 | ChiCTR2000030897 | 2020/3/16 | HwaMei Hospital, University of Chinese Academy of Sciences                                                                                                                                              | Evaluation of the effect of taking Newgen beta-gluten probiotic composite powder to nutrition intervention of patients with novel coronavirus pneumonia (COVID-19)                  |
| 456 | ChiCTR2000030902 | 2020/3/16 | Jingzhou Mental Health Center                                                                                                                                                                           | Analysis on the mental health status of residents in Jingzhou during the outbreak of the novel coronavirus pneumonia (COVID-19) and corresponding influencing factors               |
| 457 | ChiCTR2000030906 | 2020/3/16 | Institute of Biotechnology, Military Medical Science, PLA of China                                                                                                                                      | A phase I clinical trial for recombinant novel coronavirus (2019-CoV) vaccine (adenoviral vector)                                                                                   |

|     |                           |                                                                           |                                                                                                                                                                                                         |
|-----|---------------------------|---------------------------------------------------------------------------|---------------------------------------------------------------------------------------------------------------------------------------------------------------------------------------------------------|
| 458 | ChiCTR20000309192020/3/17 | Intensive Care Unit, XiangYa Hospital, Central South University           | An observational study for cardiac and pulmonary ultrasound and evaluation of treatment of severe patients with novel coronavirus pneumonia (COVID-19)                                                  |
| 459 | ChiCTR20000309222020/3/17 | Department of Infectious Diseases, Foshan First People's Hospital         | Prospective, open-label, controlled, multicenter cohort study of long-acting interferon plus ribavirin in patients with novel coronavirus pneumonia (COVID-19)                                          |
| 460 | ChiCTR20000309232020/3/17 | Affiliated Hospital of Shaanxi University of Traditional Chinese Medicine | The treatment and diagnosis plan of integrated traditional Chinese and Western medicine for novel coronavirus pneumonia (COVID-19)                                                                      |
| 461 | ChiCTR20000309292020/3/17 | Renmin Hospital of Wuhan University                                       | A randomized, double-blind, parallel-controlled trial to evaluate the efficacy and safety of anti-SARS-CoV-2 virus inactivated plasma in the treatment of severe novel coronavirus pneumonia (COVID-19) |
| 462 | ChiCTR20000309312020/3/18 | HuiZhou Municipal Central Hospital                                        | A Medical Records Based Study for Clinical Characteristic and Outcomes of Hospitalized Patients With Novel Coronavirus Pneumonia (COVID-19)                                                             |
| 463 | ChiCTR20000309322020/3/18 | Department of Infectious Diseases, Anqing Municipal Hospital              | Correlation between virological negative conversion and clinical factors and prognosis in patients with novel coronavirus pneumonia (COVID-19)                                                          |
| 464 | ChiCTR20000309342020/3/18 | The Fifth Affiliated Hospital of Sun Yat-sen University                   | A Platform for Rapid Immuno-detection and Emergency Vaccine Development of Novel Coronavirus (2019-COV)                                                                                                 |
| 465 | ChiCTR20000309392020/3/18 | PLA General Hospital                                                      | Preliminary evaluation of the safety and efficacy of oral LL-37 antiviral peptide (CAS001) in the treatment of novel coronavirus pneumonia (COVID-19)                                                   |
| 466 | ChiCTR20000309412020/3/18 | Hu'nan Provincial People's Hospital, Hu'nan Normal University             | A medical records based study for clinical features and prognosis of severe patients with novel coronavirus pneumonia (COVID-19) in Huanggan, Hubei in Huanggang.                                       |



|     |                  |           |                                                                                                                                   |                                                                                                                                                                     |
|-----|------------------|-----------|-----------------------------------------------------------------------------------------------------------------------------------|---------------------------------------------------------------------------------------------------------------------------------------------------------------------|
| 467 | ChiCTR2000030942 | 2020/3/19 | Shanghai Kongjiang Hospital                                                                                                       | Combined diagnostic value of novel coronavirus (2019-CoV) infection detected by NLR and CRP                                                                         |
| 468 | ChiCTR2000030943 | 2020/3/19 | Shandong Provincial Hospital                                                                                                      | Venous Thrombosis Risk of novel coronavirus pneumonia (COVID-19) Patients: A Prospective Study                                                                      |
| 469 | ChiCTR2000030944 | 2020/3/19 | The Second Affiliated Hospital of Nanchang University                                                                             | Clinical study of human NK cells and MSCs transplantation for severe novel coronavirus pneumonia (COVID-19)                                                         |
| 470 | ChiCTR2000030946 | 2020/3/19 | Effects of different VTE prevention methods on the prognosis of hospitalized patients with novel coronavirus pneumonia (COVID-19) | Effects of different VTE prevention methods on the prognosis of hospitalized patients with novel coronavirus pneumonia (COVID-19)                                   |
| 471 | ChiCTR2000030947 | 2020/3/19 | Beijing Chaoyang Hospital                                                                                                         | Clinical application of extracorporeal membrane oxygenation in the treatment of severe respiratory failure patients with novel coronavirus pneumonia (COVID-19)     |
| 472 | ChiCTR2000030950 | 2020/3/19 | West China Hospital, Sichuan University                                                                                           | Study for novel coronavirus pneumonia (COVID-19) patients etiology and immune response and guidance for vaccine design                                              |
| 473 | ChiCTR2000030951 | 2020/3/19 | Tongji Hospital, Tongji Medical College, Huazhong University of Science and Technology                                            | Developing and evaluating of artificial intelligence triage system for suspected novel coronavirus pneumonia (COVID-19): a retrospective study                      |
| 474 | ChiCTR2000030952 | 2020/3/19 | The Fifth Hospital Affiliated to Sun Yat-sen University                                                                           | Myocardial injury and arrhythmias in the novel coronavirus pneumonia (COVID-19) patients                                                                            |
| 475 | ChiCTR2000030961 | 2020/3/20 | Department of Respiratory Medicine, Changzheng Hospital, Naval Military Medical University                                        | A Medical Records Based Retrospective Study for Clinical Characteristics, Treatments and Prognosis of Patients with Novel Coronavirus Pneumonia (COVID-19) in WuHan |
| 476 | ChiCTR2000030985 | 2020/3/20 | Renmin Hospital of Wuhan University                                                                                               | Psychological Responses of Medical Staff during the Metaphase of novel coronavirus pneumonia (COVID-19) Outbreak in Hubei, China                                    |

|     |                           |                                                                                            |                                                                                                                                                                              |
|-----|---------------------------|--------------------------------------------------------------------------------------------|------------------------------------------------------------------------------------------------------------------------------------------------------------------------------|
| 477 | ChiCTR20000309862020/3/20 | Shenzhen Third People's Hospital                                                           | Correlation of T lymphocytes level and clinical severity in novel coronavirus pneumonia (COVID-19) patients: a medical records based retrospective study                     |
| 478 | ChiCTR20000309872020/3/20 | Beijing Chao-yang Hospital, Capital Medical University                                     | A Randomized Controlled Trial for Favipiravir Tablets Combine With Chloroquine Phosphate in the Treatment of Novel Coronavirus Pneumonia (COVID-19)                          |
| 479 | ChiCTR20000309892020/3/20 | Mental Health Service Center, Beijing Normal University                                    | Internet based Solution Focused Brief Therapy treating adolescent anxiety under the novel coronavirus pneumonia (COVID-19) outbreak: A randomized controlled trial           |
| 480 | ChiCTR20000309922020/3/20 | Department of Respiratory Medicine, Changzheng Hospital, Naval Military Medical University | A medical records based study for the diagnosis and prognosis prediction AI model of novel coronavirus pneumonia (COVID-19)                                                  |
| 481 | ChiCTR20000309932020/3/20 | Wuhan Third Hospital                                                                       | A medical records based study for the value of Upper Respiratory Tract Virus Detection in the assessment of rehabilitation of novel coronavirus pneumonia (COVID-19) patient |
| 482 | ChiCTR20000310142020/3/21 | HwaMei Hospital, University of Chinese Academy of Sciences                                 | Study for SARS-COV-2 RNA Level in Blood and Excrement of Novel Coronavirus Pneumonia (COVID-19) Convalescent Patients                                                        |
| 483 | ChiCTR20000310882020/3/22 | Xiangyang 1st People's Hospital                                                            | A prognosis study of novel coronavirus pneumonia (COVID-19)                                                                                                                  |
| 484 | ChiCTR20000310902020/3/22 | Ningbo Kangning Hospital                                                                   | Psychological Support for Diagnosed Patients with novel coronavirus pneumonia (COVID-19)                                                                                     |
| 485 | ChiCTR20000311042020/3/22 | The Fifth Affiliated Hospital of Sun Yat-Sen University                                    | Study for metagenomics of patients with novel coronavirus pneumonia (COVID-19)                                                                                               |
| 486 | ChiCTR20000311152020/3/22 | Zhengzhou People's Hospital                                                                | A medical records based study of peripheral blood T lymphocyte subsets in patients with novel coronavirus pneumonia (COVID-19)                                               |

|     |                           |                                                                                                       |                                                                                                                                                              |
|-----|---------------------------|-------------------------------------------------------------------------------------------------------|--------------------------------------------------------------------------------------------------------------------------------------------------------------|
| 487 | ChiCTR20000311382020/3/22 | The Third Xiangya Hospital of Central South University                                                | A randomized controlled trial for the efficacy and safety of pirfenidone capsules in the treatment of severe novel coronavirus pneumonia (COVID-19)          |
| 488 | ChiCTR20000311392020/3/22 | Wuhan Jinyintan Hospital (Wuhan Infectious Diseases Hospital)                                         | Safety and Effectiveness of Human embryonic stem cell-derived M cells (CAStem) for Pulmonary Fibrosis Correlated with novel coronavirus pneumonia (COVID-19) |
| 489 | ChiCTR20000311402020/3/22 | Union Hospital West Campus, Tongji Medical College, Huazhong University of Science and Technology     | Study for the impact on fetus and neonates of vertical transmission of 2019-nCoV                                                                             |
| 490 | ChiCTR20000311502020/3/23 | Hwa Mei Hospital, University of Chinese Academy of Sciences                                           | Application of radiology in the prevention and control system of emergency respiratory infectious diseases                                                   |
| 491 | ChiCTR20000311632020/3/23 | The People's Hospital of GuangXi Zhuang Autonomous Region                                             | The relationship between Vitamin D and novel coronavirus pneumonia (COVID-19)                                                                                |
| 492 | ChiCTR20000311742020/3/23 | Shanghai Public Health Clinical Center                                                                | Effectiveness and safety of hydroxychloroquine sulfate in the preventive treatment of novel coronavirus pneumonia (COVID-19)                                 |
| 493 | ChiCTR20000311762020/3/23 | People's hospital of Zhengzhou                                                                        | Study on home pharmaceutical care for chronic patients over the novel coronavirus pneumonia (COVID-19) epidemic                                              |
| 494 | ChiCTR20000311872020/3/23 | Wuhan Third Hospital & Tongren Hospital of Wuhan University                                           | A medical records based retrospective study for novel coronavirus pneumonia (COVID-19)                                                                       |
| 495 | ChiCTR20000311962020/3/23 | Diagnosis, treatment and Research Center for infectious diseases, the fifth medical center of the PLA | Efficacy and optimization of antiviral therapy for novel coronavirus pneumonia (COVID-19) patients                                                           |
| 496 | ChiCTR20000312042020/3/24 | Beijing Institute of Pharmacology and Toxicology/Beijing You'an Hospital, Capital Medical University  | A multicenter, single-blind, randomized controlled clinical trial for chloroquine phosphate in the treatment of novel coronavirus pneumonia (COVID-19)       |
| 497 | ChiCTR20000312142020/3/24 | The First Rehabilitation Hospital of Shanghai                                                         | Clinical study on the correlation between novel coronavirus pneumonia (COVID-19) clinical rehabilitation assessment and prognosis                            |

|     |                  |           |                                                                                          |                                                                                                                                                                                                |
|-----|------------------|-----------|------------------------------------------------------------------------------------------|------------------------------------------------------------------------------------------------------------------------------------------------------------------------------------------------|
| 498 | ChiCTR2000031227 | 2020/3/24 | Renmin Hospital of Wuhan University                                                      | Clinical features and prognosis of invasive mechanical ventilation patients with novel coronavirus pneumonia (COVID-19) in Wuhan, China: a single-centered, retrospective, observational study |
| 499 | ChiCTR2000031244 | 2020/3/25 | Tongji Hospital, Tongji Medical College, Huazhong University of Science and Technology   | Shedding virus and functional prognosis in patients with novel coronavirus pneumonia (COVID-19): a cohort study                                                                                |
| 500 | ChiCTR2000031245 | 2020/3/25 | Renmin Hospital of Wuhan University                                                      | Epidemiologic and Clinical Characteristics of novel coronavirus pneumonia (COVID-19) in surgical patients: a medical records based retrospective study                                         |
| 501 | ChiCTR2000031246 | 2020/3/25 | School of Public Health and Management, Chongqing Medical University                     | Epidemiological survey of close contacts of novel coronavirus pneumonia (COVID-19)                                                                                                             |
| 502 | ChiCTR2000031247 | 2020/3/25 | West China Hospital, Sichuan University                                                  | Study on the mental state of medical staff during the epidemic period of novel coronavirus pneumonia (COVID-19)                                                                                |
| 503 | ChiCTR2000031252 | 2020/3/25 | Department of Public Health and Management, Chongqing Medical University                 | Outcomes and infectivity of patients with asymptomatic novel coronavirus (COVID-19) infection                                                                                                  |
| 504 | ChiCTR2000031271 | 2020/3/26 | Department of Pediatrics, The Third Affiliated Hospital of Sun Yat-sen University        | Metabolic abnormalities and rearrangement reversal treatment of patient with novel coronavirus pneumonia (COVID-19)                                                                            |
| 505 | ChiCTR2000031272 | 2020/3/26 | China European International Business School (CEIBS)                                     | The effectiveness of mindfulness intervention in improving people's psychological and physical well-being during novel coronavirus pneumonia (COVID-19) outbreak                               |
| 506 | ChiCTR2000031293 | 2020/3/27 | Tongji Hospital of Tongji Medical College, Huazhong University of Science and Technology | Epidemiological study of novel coronavirus infection (COVID-19) in children at medium/low risk                                                                                                 |
| 507 | ChiCTR2000031296 | 2020/3/27 | Yichang Central People's Hospital                                                        | A medical records based study for clinical features of novel coronavirus pneumonia (COVID-19) patients and risk factors of death                                                               |

|     |                  |           |                                                                                        |                                                                                                                                                                         |
|-----|------------------|-----------|----------------------------------------------------------------------------------------|-------------------------------------------------------------------------------------------------------------------------------------------------------------------------|
| 508 | ChiCTR2000031301 | 2020/3/27 | China-Japan Union hospital of Jilin University                                         | A retrospective study of clinical characteristics and prognosis of novel coronavirus pneumonia (COVID-19) patients with myocardial injury                               |
| 509 | ChiCTR2000031319 | 2020/3/27 | Center for Regenerative Medicine, Renmin Hospital of Wuhan University                  | Safety and Efficacy Study of Allogeneic Human Dental Pulp Mesenchymal Stem Cells to Treat Severe novel coronavirus pneumonia (COVID-19) patients                        |
| 510 | ChiCTR2000031324 | 2020/3/27 | Nanjing University Medical College Affiliated Drum Tower Hospital                      | The investigation on medical adhesive-related skin injury caused by protective dressings of medical staffs during the period of novel coronavirus pneumonia (COVID-19)  |
| 511 | ChiCTR2000031327 | 2020/3/27 | Tongji Hospital, Tongji Medical College, Huazhong University of Science and Technology | Clinical characteristics and death risk factors in severe novel coronavirus pneumonia (COVID-19) patients: a single-center respective analysis based on medical records |
| 512 | ChiCTR2000031328 | 2020/3/27 | First Teaching Hospital of Tianjin University of Traditional Chinese Medicine          | The protective effect of sleep psychology and music therapy of novel coronavirus pneumonia (COVID-19) mild and moderate type patients                                   |
| 513 | ChiCTR2000031329 | 2020/3/27 | Guangdong Second Provincial General Hospital                                           | Influence of novel coronavirus pneumonia (COVID-19) on disease activity, medical and mental condition of patients with rheumatic diseases                               |
| 514 | ChiCTR2000031330 | 2020/3/27 | Shandong Eye Institute                                                                 | Analysis for prevention and control effects of orthokeratology lens on myopia adolescents during the novel coronavirus pneumonia (COVID-19) pandemic situation          |
| 515 | ChiCTR2000031336 | 2020/3/28 | Union Hospital, Tongji Medical College, Huazhong University of Science and Technology  | AI based prognostic evaluation of novel coronavirus pneumonia (COVID-19)                                                                                                |
| 516 | ChiCTR2000031337 | 2020/3/28 | Shandong Eye Institute                                                                 | The relationship between habits of using eyes, degree of visual fatigue and myopia progression in students during the novel coronavirus pneumonia (COVID-19) pandemic   |
| 517 | ChiCTR2000031356 | 2020/3/28 | Union Hospital, Tongji Medical College, Huazhong                                       | Study for the changes of the brain structure and function in healed patients                                                                                            |

|     |                                                                                                                                     |                                                                                                                                                                                    |
|-----|-------------------------------------------------------------------------------------------------------------------------------------|------------------------------------------------------------------------------------------------------------------------------------------------------------------------------------|
|     | University of Science and Technology                                                                                                | of novel coronavirus pneumonia (COVID-19)                                                                                                                                          |
| 518 | ChiCTR20000313612020/3/28 Maternal and Child Health Hospital of Hubei Province                                                      | Retrospective analysis of anesthesia management of emergency cesarean section in non-pneumonia hospital of Wuhan during pandemic of novel coronavirus pneumonia (COVID-19)         |
| 519 | ChiCTR20000313652020/3/29 Taizhou Hospital of Zhejiang Province                                                                     | To explore the pathogenesis and course prediction of novel coronavirus pneumonia (COVID-19) severe patients                                                                        |
| 520 | ChiCTR20000313662020/3/29 Department of Pulmonary & Critical Care Medicine, Chinese People's Liberation Army (PLA) General Hospital | Causes of fever in outpatient outside Wuhan during novel coronavirus pneumonia (COVID-19) pandemic: a medical records based retrospective analysis                                 |
| 521 | ChiCTR20000313762020/3/29 Peking University Third Hospital                                                                          | A medical records based study for safety and effectiveness analysis of data from novel coronavirus pneumonia (COVID-19) patients with conventional therapy                         |
| 522 | ChiCTR20000314272020/3/31 the First People's Hospital of Jiangxia District                                                          | Novel coronavirus infection (COVID-19) IgM detection kit (magnetic particle chemiluminescence) clinical trial                                                                      |
| 523 | ChiCTR20000314282020/3/31 Wuhan Asia General Hospital                                                                               | Clinical application value of multiple tests for novel coronavirus pneumonia (COVID-19)                                                                                            |
| 524 | ChiCTR20000314292020/3/31 Tongji Hospital, Tongji Medical College, Huazhong University of Science and Technology                    | The Effects of novel coronavirus pneumonia (COVID-19) Risk Factors on Dynamic Changes of Immunological, biochemical, and Metabolic Parameters: a Retrospective Observational Study |
| 525 | ChiCTR20000314302020/3/31 The Fifth Medical Center of PLA General Hospital                                                          | Clinical study of human umbilical cord mesenchymal stem cells in the treatment of novel coronavirus pneumonia (COVID-19) induced pulmonary fibrosis                                |
| 526 | ChiCTR20000314322020/4/1 Nanjing University                                                                                         | A single center clinical study of evaluating the injection of microRNA2911 plasmid in healthy adults                                                                               |

|     |                          |                                                                                        |                                                                                                                                                                                                                                       |
|-----|--------------------------|----------------------------------------------------------------------------------------|---------------------------------------------------------------------------------------------------------------------------------------------------------------------------------------------------------------------------------------|
| 527 | ChiCTR20000314382020/4/1 | Affiliated Hospital of Southwest Medical University                                    | Analysis of changes in high risk factors of cervical spondylosis during novel coronavirus pneumonia (COVID-19) pandemic                                                                                                               |
| 528 | ChiCTR20000314392020/4/1 | Tongji Hospital, Tongji Medical College, Huazhong University of Science and Technology | A medical records based study for novel coronavirus pneumonia (COVID-19) patients undergoing endotracheal intubation                                                                                                                  |
| 529 | ChiCTR20000314532020/4/1 | Tongji Hospital, Tongji Medical College, Huazhong University of Science and Technology | Efficacy and safety of Nintedanib esilate soft capsules in the treatment of pulmonary fibrosis in healed moderate to severe patients of novel coronavirus pneumonia (COVID-19): a single-center, randomized, placebo-controlled trial |
| 530 | ChiCTR20000314542020/4/1 | The Fifth Affiliated Hospital of Sun Yat-Sen University                                | Clinical study for prevention and treatment of digestive tract lesions caused by novel coronavirus pneumonia (COVID-19)                                                                                                               |
| 531 | ChiCTR20000314652020/4/2 | the First People's Hospital of Jiangxia District                                       | Novel coronavirus (2019-nCoV) IgG detection kit (magnetic particle chemiluminescence) clinical trial                                                                                                                                  |
| 532 | ChiCTR20000314942020/4/2 | Huangshi Hospital of Traditional Chinese Medicine                                      | Clinical study for stem cells in the treatment of severe novel coronavirus pneumonia (COVID-19)                                                                                                                                       |
| 533 | ChiCTR20000314992020/4/2 | Shanghai Oriental Hospital                                                             | Sleep quality of patients with novel coronavirus pneumonia (COVID-19) treated in mobile cabin hospital: a retrospective study                                                                                                         |
| 534 | ChiCTR20000315002020/4/2 | Peking University First Hospital                                                       | Impact of measuring distance and cold outdoor environment on the screening of novel coronavirus pneumonia (COVID-19)                                                                                                                  |
| 535 | ChiCTR20000315012020/4/2 | Eastern theater General Hospital                                                       | The efficacy of convalescent plasma in patients with critical novel coronavirus pneumonia (COVID-19): a pragmatic, prospective cohort study                                                                                           |
| 536 | ChiCTR20000315032020/4/3 | Shanghai Sixth People's Hospital                                                       | Application of non-invasive multichannel cardiopulmonary monitoring cloud management platform in patients with Novel Coronavirus Pneumonia (COVID-19)                                                                                 |

|     |                          |                                                                                        |                                                                                                                                                                                    |
|-----|--------------------------|----------------------------------------------------------------------------------------|------------------------------------------------------------------------------------------------------------------------------------------------------------------------------------|
| 537 | ChiCTR20000315042020/4/3 | Tongji Hospital, Tongji Medical College, Huazhong University of Science and Technology | A multi-center telephone follow-up study of disease management and infection in rheumatic patients during novel coronavirus pneumonia (COVID-19) pandemic in Hubei province        |
| 538 | ChiCTR20000315332020/4/3 | Peking Union Hospital                                                                  | Survey of psychological status and related factors of emergency medical staff in the country during the novel coronavirus pneumonia (COVID-19) pandemic                            |
| 539 | ChiCTR20000315382020/4/3 | Ninth People's Hospital, Shanghai Jiao Tong University School of Medicine              | Assessment of mental health status of first-line dental emergency medical personnel during novel coronavirus pneumonia (COVID-19) pandemic                                         |
| 540 | ChiCTR20000315392020/4/3 | Wuhan Women and Children's Health Care Center                                          | A Medical Records Based Study for the Correlation between Angiotensin II Type 1 Receptor Blockers (ARBs) and the Progression and Outcome of Novel Coronavirus Pneumonia (COVID-19) |
| 541 | ChiCTR20000315402020/4/3 | Affiliated Hospital of Zunyi Medical University                                        | Study for clinical effect of rehabilitation nursing program for patients with novel coronavirus pneumonia (COVID-19)                                                               |
| 542 | ChiCTR20000315872020/4/4 | Tongji Hospital, Tongji Medical College, Huazhong University of Science and Technology | A paired clinical study for novel coronavirus pneumonia (COVID-19) patients with ordinary, severe, critical, and deceased patients in Tongji Hospital                              |
| 543 | ChiCTR20000315892020/4/4 | Wuhan University Renmin Hospital                                                       | Investigation for the sleep quality in non-health care workers during the pandemic of novel coronavirus pneumonia (COVID-19)                                                       |
| 544 | ChiCTR20000316272020/4/4 | 2nd People's Hospital of Fuyang City                                                   | Study for the Mechanism of the Relationship between Infection of novel coronavirus pneumonia (COVID-19) and Host Innate Immune                                                     |
| 545 | ChiCTR20000316302020/4/4 | Guangzhou Eighth People's Hospital                                                     | Clinical study for Celebrex in the treatment of novel coronavirus pneumonia (COVID-19)                                                                                             |



|     |                          |                                                                  |                                                                                                                                                                                                 |
|-----|--------------------------|------------------------------------------------------------------|-------------------------------------------------------------------------------------------------------------------------------------------------------------------------------------------------|
| 546 | ChiCTR20000316392020/4/4 | Peking University Sixth Hospital                                 | Effects of a single session internet-delivered cognitive behavioral therapy for Acute Insomnia during the pandemic of novel coronavirus pneumonia (COVID-19)                                    |
| 547 | ChiCTR20000316752020/4/5 | Women's Hospital, Medical School of Zhejiang University          | A medical records based retrospective analysis of maternal and infant outcomes in Cesarean delivery in Hangzhou non pneumonia Hospital during pandemic of Novel coronavirus pneumonia(COVID-19) |
| 548 | ChiCTR20000316992020/4/7 | Wenzhou Central Hospital                                         | Study for immune antibody and multi-group function of novel coronavirus pneumonia (COVID-19) patients                                                                                           |
| 549 | ChiCTR20000317002020/4/7 | Chinese PLA General Hospital                                     | Development and clinical application of novel coronavirus pneumonia (COVID-19) antigen reagent                                                                                                  |
| 550 | ChiCTR20000317052020/4/7 | Shanghai Jiao Tong University Affiliated Sixth People's Hospital | Study for early biological warning signals in patients with acute renal injury caused by novel coronavirus pneumonia (COVID-19)                                                                 |
| 551 | ChiCTR20000317072020/4/7 | Shanghai Orient Hospital                                         | Study for sleep quality of medical teams members moved to Hubei for the fighting of novel coronavirus pneumonia (COVID-19) pandemic                                                             |
| 552 | ChiCTR20000317122020/4/7 | Chinese University of Hong Kong                                  | Study for investigation of contamination by novel coronavirus pneumonia (COVID-19) in the clinical environment                                                                                  |
| 553 | ChiCTR20000317342020/4/8 | Huoshenshan Hospital                                             | a randomized, open-label, controlled trial                                                                                                                                                      |
| 554 | ChiCTR20000317352020/4/8 | Huzhou Central Hospital                                          | Clinical study for natural killer (NK) cells from umbilical cord blood in the treatment of novel coronavirus pneumonia (COVID-19)                                                               |
| 555 | ChiCTR20000317512020/4/8 | Wuhan Fourth Hospital                                            | Novel coronavirus pneumonia (COVID-2019) patients' prognosis and their influence on heart and lung function                                                                                     |
| 556 | ChiCTR20000317522020/4/9 | the First Affiliated Hospital of Nanjing Medical University      | A medical records based observational study for myocardial injury and cardiac function in critically ill patients with novel coronavirus pneumonia (COVID-19)                                   |

|     |                           |                                                                                                                                             |                                                                                                                                                                         |
|-----|---------------------------|---------------------------------------------------------------------------------------------------------------------------------------------|-------------------------------------------------------------------------------------------------------------------------------------------------------------------------|
| 557 | ChiCTR20000317702020/4/10 | Shanghai Jiao Tong University Affiliated Sixth People's Hospital                                                                            | Experiences in nursing care for patients with suspected novel coronavirus pneumonia (COVID-19) in Shanghai                                                              |
| 558 | ChiCTR20000317792020/4/10 | Shandong Provincial Hospital                                                                                                                | Effect of novel coronavirus pneumonia (COVID-19) upon male reproductive system                                                                                          |
| 559 | ChiCTR20000317812020/4/10 | Institute of Biotechnology, Academy of Military Medical Sciences, PLA of China/Jiangsu Provincial Center for Disease Control and Prevention | A randomized, double-blinded, placebo-controlled phase II clinical trial for Recombinant Novel Coronavirus (2019-nCoV) Vaccine (Adenovirus Vector)                      |
| 560 | ChiCTR20000317822020/4/10 | The Second Xiangya Hospital of Central South University                                                                                     | A questionnaire investigation of hydroxychloroquine for its potential protective effect against novel coronavirus infection (COVID-19)                                  |
| 561 | ChiCTR20000317942020/4/10 | Huanggang Central Hospital                                                                                                                  | A medical records based retrospective study for analysis clinical characteristics and risk factors of death in patients with novel coronavirus pneumonia (COVID-19)     |
| 562 | ChiCTR20000318092020/4/10 | Wuhan Institute of Biological Products co., LTD./He'nan Provincial Center for Disease Control and Prevention                                | A randomized, double-blind, placebo parallel-controlled phase I/II clinical trial for inactivated COVID-19 vaccine (Vero cells)                                         |
| 563 | ChiCTR20000318342020/4/11 | Chengdu Shangyi Information Technology co. LTD/Jiangsu Provincial Hospital                                                                  | A clinical study for the effect of remote monitoring exercise rehabilitation on the discharged patients with novel coronavirus pneumonia (COVID-19)                     |
| 564 | ChiCTR20000318362020/4/11 | The First Affiliated Hospital of Yangtze University                                                                                         | A Medical Records Based study for the Clinical Characteristics Of Hospitalized Novel Coronavirus Pneumonia (COVID-19) Patients With Acute Respiratory Distress Syndrome |
| 565 | ChiCTR20000318602020/4/12 | Beijing Sports University                                                                                                                   | Study for the exercise rehabilitation therapy for the dysfunction of cured discharged novel coronavirus pneumonia (COVID-19) patients                                   |
| 566 | ChiCTR20000318962020/4/14 | Fujian Provincial Hospital                                                                                                                  | Study for the influence of novel coronavirus pneumonia (COVID-19) on mental health of Chinese public hospital staffs                                                    |

|     |                           |                                                                                                               |                                                                                                                                                                                                    |
|-----|---------------------------|---------------------------------------------------------------------------------------------------------------|----------------------------------------------------------------------------------------------------------------------------------------------------------------------------------------------------|
| 567 | ChiCTR20000319282020/4/14 | The Chinese University of Hong Kong                                                                           | Delineate the prevalence, risk factors, temporal distribution and epidemiological characteristics of hidden novel coronavirus (2019-nCoV) infection in the community                               |
| 568 | ChiCTR20000319302020/4/15 | Affiliated Hospital of Zunyi Medical University                                                               | Analysis of clinical characteristics and therapeutic effect of 9 cases of novel coronavirus pneumonia (COVID-19)                                                                                   |
| 569 | ChiCTR20000319542020/4/15 | International Peace Maternity and Children Health Hospital, School of Medicine, Shanghai Jiao Tong University | Medical Records Based Study for Maternal and Perinatal Outcomes of Women with novel coronavirus pneumonia (COVID-19)                                                                               |
| 570 | ChiCTR20000320092020/4/17 | Renji Hospital, Shanghai Jiaotong University School of Medicine                                               | Clinical characteristics and risk factors of novel coronavirus pneumonia (COVID-19) patients with chronic liver disease                                                                            |
| 571 | ChiCTR20000320102020/4/17 | Union Hospital, Tongji Medical College, Huazhong University of Science and Technology                         | Novel coronavirus pneumonia (COVID-19) Intelligent Assistant Analysis System:A Multi-center Clinical Research                                                                                      |
| 572 | ChiCTR20000320112020/4/17 | Sixth Medical Center of PLA General Hospital                                                                  | Efficacy and Safety of Hyperbaric Oxygen Therapy to patients with novel coronavirus pneumonia (COVID-19)                                                                                           |
| 573 | ChiCTR20000320132020/4/17 | The Fourth Medical Center of Chinese PLA General Hospital                                                     | The prevention and treatment strategy of the protective respirator related facial pressure injuries among healthcare professionals fighting novel coronavirus pneumonia (COVID-19)                 |
| 574 | ChiCTR20000320952020/4/19 | The Third Affiliated Hospital of Sun Yat-sen University                                                       | Study for Healthy Behavior, Psychological Analysis and Psychological Reconstruction Strategies of Students Population Keeping in Home Under the Pandemic of Novel Coronavirus Pneumonia (COVID-19) |
| 575 | ChiCTR20000321352020/4/20 | Shanghai Public Health Clinical Center                                                                        | Efficacy and Safety of ulinastatin in the Treatment of novel coronavirus pneumonia (COVID-19)                                                                                                      |
| 576 | ChiCTR20000321612020/4/21 | Tongji Hospital, Tongji Medical College, Huazhong University of Science and Technology                        | A retrospective study for evolution and clinical outcomes study of novel coronavirus pneumonia (COVID-19) patients                                                                                 |

|     |                  |           |                                                                                                    |                                                                                                                                                                                                        |
|-----|------------------|-----------|----------------------------------------------------------------------------------------------------|--------------------------------------------------------------------------------------------------------------------------------------------------------------------------------------------------------|
| 577 | ChiCTR2000032162 | 2020/4/21 | Children's Hospital of Chongqing Medical University/Seventh Medical Center of PLA General Hospital | A medical records based study for ECMO in the rescue therapy of extremely critical novel coronavirus pneumonia (COVID-19) patients                                                                     |
| 578 | ChiCTR2000032213 | 2020/4/23 | the First Affiliated Hospital of Chongqing Medical University                                      | A medical records based study for the impact of wearing medical masks on oxygen saturation in adult surgical patients after general anaesthesia during novel coronavirus pneumonia (COVID-19) pandemic |
| 579 | ChiCTR2000032214 | 2020/4/23 | Hubei Provincial Hospital of TCM                                                                   | Screening of proprietary Chinese medicines in convalescent rehabilitation of novel coronavirus pneumonia (COVID-19) convalescent patients                                                              |
| 580 | ChiCTR2000032233 | 2020/4/23 | Xinhua Hospital Affiliated to Shanghai Jiao Tong University School of Medicine                     | Clinical study for the potential impact of novel coronavirus pneumonia (COVID-19) on endocrine system                                                                                                  |
| 581 | ChiCTR2000032239 | 2020/4/23 | Yangzhou Jiangdu People's Hospital                                                                 | Epidemiological characteristics of 88 patients with new coronavirus pneumonia (COVID-19) and its impact on severe disease                                                                              |
| 582 | ChiCTR2000032242 | 2020/4/24 | The First Affiliated Hospital of Harbin Medical University                                         | A multicenter, randomized, open, controlled trial for the efficacy and safety of oral kolimycin in the treatment of patients with new coronavirus pneumonia (CoVID-19)                                 |
| 583 | ChiCTR2000032314 | 2020/4/25 | West China Hospital, Sichuan University                                                            | A randomized clinical trial for the efficacy and safety of Aliskiren and Nifedipine in novel coronavirus pneumonia (COVID-19) patients with hypertension                                               |
| 584 | ChiCTR2000032346 | 2020/4/26 | The First Affiliated Hospital of Guangzhou University of Chinese Medicine                          | Lingnan Fire-Needle Therapy Improves the Quality of Life in General Population Under the Pandemic of novel coronavirus pneumonia (COVID-19): A Prospective, Randomized Controlled Trial                |
| 585 | ChiCTR2000032368 | 2020/4/26 | China-Japan Friendship Hospital                                                                    | Investigation on the mental health status and intervention of the medical staff of the national rescue medical team in hubei province during the pandemic of novel coronavirus pneumonia (COVID-19)    |

|     |                           |                                                                                                                                                              |                                                                                                                                                                                                                                             |
|-----|---------------------------|--------------------------------------------------------------------------------------------------------------------------------------------------------------|---------------------------------------------------------------------------------------------------------------------------------------------------------------------------------------------------------------------------------------------|
| 586 | ChiCTR20000324002020/4/27 | Emergency department of Rujin Hospital, Shanghai Jiao Tong University School of Medicine                                                                     | the efficacy and safety of high dose intravenous vitamin C in the treatment of novel coronavirus pneumonia (COVID-19): a prospective, randomized, controlled trial                                                                          |
| 587 | ChiCTR20000324552020/4/28 | Ningxia Ning'an Hospital                                                                                                                                     | A study for the mental health status of novel coronavirus pneumonia (COVID-19) convalescent patients and first-line medical staff and Isolate residents and Hospital staff and the intervention strategy of psychological crisis in Ningxia |
| 588 | ChiCTR20000324562020/4/28 | Shanghai Public Health Clinical Center                                                                                                                       | A Randomized Controlled Trial for the Effects of Low-Oxygen Consumption Instruction on the Prognosis of Patients with Novel Coronavirus Pneumonia (COVID-19)                                                                                |
| 589 | ChiCTR20000324572020/4/28 | West Campus of Union Hospital affiliated to Tongji Medical College of Huazhong University of Science and Technology                                          | Application of pulmonary rehabilitation exercise in the treatment of novel coronavirus pneumonia (COVID-19) patients during convalescence period.                                                                                           |
| 590 | ChiCTR20000324582020/4/28 | Affiliated Hospital of Zunyi Medical University                                                                                                              | A medical records based retrospective study: Leukopenia is more common in asymptomatic patients less than 18 years old with novel coronavirus pneumonia (COVID-19) in convalescence                                                         |
| 591 | ChiCTR20000324592020/4/28 | Beijing Institute of Biological Products Co., LTD. /He'nan Provincial Center for Disease Control and Prevention                                              | A phase I/II clinical trial for inactivated novel coronavirus (2019-CoV) vaccine (Vero cells)                                                                                                                                               |
| 592 | ChiCTR20000324602020/4/29 | The First Affiliated Hospital of university of Science and Technology of China                                                                               | Early warning model and new biomarker of severe novel coronavirus pneumonia (COVID-19)                                                                                                                                                      |
| 593 | ChiCTR20000324762020/4/29 | Xiangya Hospital Central South University                                                                                                                    | Analysis of clinical features of novel coronavirus pneumonia (COVID-19): a medical records based study                                                                                                                                      |
| 594 | ChiCTR20000324782020/4/29 | Institute of Basic Research for Clinical Medicine, China Academy of Chinese Medical Sciences/Guang'anmen Hospital, China Academy of Chinese Medical Sciences | TCM Intervention study for novel coronavirus pneumonia (COVID-19) patient during home/designate-unit isolation based on community prevention and control                                                                                    |

|     |                           |                                                                                                                                |                                                                                                                                                                                                                       |
|-----|---------------------------|--------------------------------------------------------------------------------------------------------------------------------|-----------------------------------------------------------------------------------------------------------------------------------------------------------------------------------------------------------------------|
| 595 | ChiCTR20000324872020/4/29 | Shanghai Public Health Clinical Center                                                                                         | Study for using sulfate in the prevention and control of novel coronavirus pneumonia (COVID-19) in high and low prevalence communities                                                                                |
| 596 | ChiCTR20000325142020/4/30 | Zhongnan Hospital of Wuhan University                                                                                          | Direct evidence of rectal cancer patient infected with novel coronavirus pneumonia (COVID-19)                                                                                                                         |
| 597 | ChiCTR20000325272020/5/1  | Eergency / Intensive Care Department of Tongji Hospital, Tongji Medical College, Huazhong University of Science and Technology | Developing and validating of clinical prediction model for novel coronavirus pneumonia (COVID-19) patients progressing to critical type, acute respiratory distress syndrome and death: a medical records based study |
| 598 | ChiCTR20000325742020/5/3  | Ganzhou People's Hospital                                                                                                      | Diagnostic value of chest CT in outpatient for novel coronavirus pneumonia (COVID-19) compared to RT-PCR                                                                                                              |
| 599 | ChiCTR20000326662020/5/5  | Union Hospital, Tongji Medical College, Huazhong University of Science and Technology                                          | Follow-up study of pregnancy outcomes of novel coronavirus pneumonia (COVID-19) complicated in the first and second trimester                                                                                         |
| 600 | ChiCTR20000326862020/5/6  | Huazhong University of Science and Technology                                                                                  | Study for the application of novel coronavirus pneumonia (COVID-19) intestinal tract toxicity in diagnosis and its prognostic effect                                                                                  |
| 601 | ChiCTR20000327162020/5/8  | Ruijin Hospital Affiliated to Shanghai Jiaotong University School of Medicine                                                  | High dose intravenous vitamin C might be used as an important rescue therapy for aggravation of severe and critical novel coronavirus pneumonia (COVID-19) patients                                                   |
| 602 | ChiCTR20000327372020/5/8  | The First Affiliated Hospital of Guangdong Pharmaceutical University                                                           | Clinical trial for the washed microbiota transplantation in the treatment of novel coronavirus pneumonia (COVID-19) patients suspected with gut microbiota dysbiosis                                                  |
| 603 | ChiCTR20000327432020/5/9  | The First Affiliated Hospital of Dalian Medical University                                                                     | The effectiveness of diaphragmatic breathing relaxation training for improving sleep quality among nursing staff during the novel coronavirus pneumonia (COVID-19) pandemic: a before and after study                 |

|     |                           |                                                                         |                                                                                                                                                         |
|-----|---------------------------|-------------------------------------------------------------------------|---------------------------------------------------------------------------------------------------------------------------------------------------------|
| 604 | ChiCTR20000327682020/5/9  | Department of Nursing, Xiangya Third Hospital, Central South University | Correlation between novel coronavirus pneumonia (COVID-19) and mental health of breast cancer patients: a cross-sectional study in Hunan Province       |
| 605 | ChiCTR20000327702020/5/10 | Affiliated Hospital of Zunyi Medical University                         | Asymptomatic novel coronavirus pneumonia (COVID-19) patients Have Longer Treatment Cycle Than Mild and Moderate Patients: a medical records based study |

605 clinical trials were registered nationwide for combating COVID-19. Registration ID, Record Date, Research Institutions and Trials Title were the mainly points with details here. In particular, 137 clinical trials were related to TCM, containing 76 definitely related to remedies or TCM patents, 32 with other TCM treatments (e.g., Shadowboxing, Liu-Zi-Jue Qigong, moxibustion, acupuncture, Triple Energizer Treatment, etc.) and 29 combining with Western Medicine; while the last were largely no concerned with TCM.
